# Supplementary material for: Identification of Fatty acid metabolism-Related Genes in the Progression from Non-Alcoholic Fatty Liver to Nonalcoholic fatty liver disease
Source: Research Square preprint supplement (doi:10.21203/rs.3.rs-5030401/v1), 2024-10-21
Supplement: Supplementary file 1 [file 078903ef7a7a37295be24b23.docx]

| ID | Description | GeneRatio | BgRatio | pvalue | p.adjust | qvalue | geneID | Count |
| --- | --- | --- | --- | --- | --- | --- | --- | --- |
| hsa04668 | TNF signaling pathway | 32/990 | 112/8157 | 2.02E-06 | 0.00067238 | 0.000597246 | BCL3/IL6/EDN1/CCL2/PTGS2/JUNB/SOCS3/CXCL10/TRADD/IKBKB/LIF/TNFRSF1A/FOS/VEGFC/MAP3K14/MAP3K8/CXCL1/CREB3L3/ICAM1/MAPK9/IL1B/FAS/BAG4/TNFRSF1B/CCL5/CREB3L4/IL15/MAP3K7/JUN/CXCL2/TRAF3/RPS6KA5 | 32 |
| hsa05166 | Human T-cell leukemia virus 1 infection | 45/990 | 222/8157 | 0.00031461 | 0.052382525 | 0.046529128 | IL6/FOSL1/MYC/EGR1/ZFP36/SRF/IKBKB/POLB/CRTC3/CD3G/LTBR/TLN2/ANAPC7/TNFRSF1A/ETS2/IL15RA/FOS/MAP3K14/TGFB3/TGFBR2/MAD2L1/SMAD3/MSX1/CDC23/PTTG1/VDAC3/XPO1/LCK/CHEK1/CREB3L3/NFATC2/ICAM1/MAPK9/ANAPC11/JAK3/CD3E/CREB3L4/CDKN1A/IL15/NFATC4/JUN/ADCY6/PRKACB/HLA-A/NFYB | 45 |
| hsa04933 | AGE-RAGE signaling pathway in diabetic complications | 24/990 | 100/8157 | 0.000694143 | 0.07704986 | 0.068440053 | IL6/EDN1/CCL2/FOXO1/EGR1/VEGFC/TGFB3/TGFBR2/SMAD3/THBD/PIM1/PLCB1/COL1A2/CDKN1B/SERPINE1/PLCD1/ICAM1/MAPK9/NOS3/IL1B/RAC1/COL4A3/VEGFA/JUN | 24 |
| hsa05164 | Influenza A | 34/990 | 171/8157 | 0.002292432 | 0.113604651 | 0.10091009 | IL6/OAS1/CCL2/SOCS3/CXCL10/TRADD/IKBKB/CASP1/NXT1/TNFRSF1A/CDK6/TNFRSF10B/RNASEL/TLR7/PRSS3/XPO1/DDX58/APAF1/ICAM1/IL1B/FAS/TNFSF10/OAS2/TMPRSS2/ACTB/CCL5/TLR3/IFIH1/RSAD2/TICAM1/OAS3/IFNA8/TRAF3/EIF2AK2 | 34 |
| hsa03030 | DNA replication | 11/990 | 36/8157 | 0.002688063 | 0.113604651 | 0.10091009 | PCNA/FEN1/MCM5/RFC1/RFC3/MCM6/POLE2/POLD1/RNASEH2A/RFC5/PRIM1 | 11 |
| hsa04060 | Cytokine-cytokine receptor interaction | 52/990 | 295/8157 | 0.003221124 | 0.113604651 | 0.10091009 | IL6/CLCF1/IL4R/CXCL9/CCL2/CXCL10/INHBB/LIF/LTBR/IL18RAP/TNFRSF1A/CSF3R/IL20/IL15RA/IL10/TGFB3/TGFBR2/CXCL1/CX3CR1/OSM/TNFRSF10D/TNFRSF10B/CSF3/CCL7/IL1RN/ACVR2B/BMP5/INHBE/CCL18/CCR2/IL1RL1/CSF2RB/EDAR/THPO/CXCL11/GDF5/IL1B/FAS/EBI3/TNFSF10/TNFRSF1B/LEPR/CCL5/IL15/CD40LG/BMPR1A/TNFRSF8/CXCL2/CXCL13/IL11/IFNA8/IL32 | 52 |
| hsa05323 | Rheumatoid arthritis | 21/990 | 93/8157 | 0.003253933 | 0.113604651 | 0.10091009 | IL6/CCL2/ACP5/FOS/TGFB3/CXCL1/ATP6V0D1/CTLA4/ICAM1/IL1B/ATP6V1B2/CCL5/IL15/VEGFA/ATP6V1A/JUN/CXCL2/IL11/ATP6V1D/ATP6V1E2/ATP6V1H | 21 |
| hsa05169 | Epstein-Barr virus infection | 38/990 | 202/8157 | 0.003630743 | 0.113604651 | 0.10091009 | IL6/OAS1/MYC/CXCL10/TRADD/IKBKB/GADD45B/CD3G/MAP3K14/CDK6/PSMD14/ISG15/SKP2/PSMD1/DDX58/CD19/APAF1/GADD45G/CDKN1B/ICAM1/MAPK9/FAS/RAC1/OAS2/JAK3/CD3E/CDKN1A/ENTPD3/PSMD7/MAP3K7/BCL2L11/JUN/HLA-A/OAS3/IFNA8/TRAF3/PSMD4/EIF2AK2 | 38 |
| hsa04061 | Viral protein interaction with cytokine and cytokine receptor | 22/990 | 100/8157 | 0.003697724 | 0.113604651 | 0.10091009 | IL6/CXCL9/CCL2/CXCL10/LTBR/IL18RAP/TNFRSF1A/IL20/IL10/CXCL1/CX3CR1/TNFRSF10D/TNFRSF10B/CCL7/CCL18/CCR2/CXCL11/TNFSF10/TNFRSF1B/CCL5/CXCL2/CXCL13 | 22 |
| hsa04068 | FoxO signaling pathway | 27/990 | 131/8157 | 0.003708674 | 0.113604651 | 0.10091009 | IL6/CCNG2/BCL6/FOXO1/IKBKB/GADD45B/HOMER1/IL10/TGFB3/TGFBR2/PRKAA2/SMAD3/PRKAB2/CSNK1E/SKP2/GADD45G/CDKN1B/KLF2/MAPK9/TNFSF10/FOXO3/CDKN1A/BCL2L11/SETD7/IRS2/RAG2/PRKAG1 | 27 |
| hsa04142 | Lysosome | 27/990 | 132/8157 | 0.004139096 | 0.113604651 | 0.10091009 | SUMF1/ACP5/AP3S1/MANBA/SLC11A1/ATP6V0D1/NPC1/CTSZ/AP1S1/SLC17A5/HEXA/AP3M1/GM2A/CTSG/GLA/CLTA/CTNS/PPT1/LIPA/CTSE/AP3M2/M6PR/FUCA1/LAMP2/LAMP3/NCOA7/ATP6V1H | 27 |
| hsa03430 | Mismatch repair | 8/990 | 23/8157 | 0.004195147 | 0.113604651 | 0.10091009 | MSH2/PCNA/PMS2/RFC1/RFC3/MLH1/POLD1/RFC5 | 8 |
| hsa05418 | Fluid shear stress and atherosclerosis | 28/990 | 139/8157 | 0.004435016 | 0.113604651 | 0.10091009 | EDN1/CCL2/SDC4/IKBKB/TNFRSF1A/FOS/PRKAA2/CALML4/CALM3/MGST1/THBD/ACVR2B/GSTA4/GSTO1/KLF2/ICAM1/MAPK9/NOS3/IL1B/RAC1/KEAP1/ACTB/BMPR1A/MAP2K5/VEGFA/MAP3K7/JUN/NFE2L2 | 28 |
| hsa05210 | Colorectal cancer | 19/990 | 86/8157 | 0.006399388 | 0.15221401 | 0.135205111 | MSH2/TCF7L1/MYC/TCF7L2/GADD45B/RALGDS/FOS/TGFB3/TGFBR2/SMAD3/AXIN1/GADD45G/MAPK9/RAC1/MLH1/CDKN1A/BCL2L11/JUN/AXIN2 | 19 |
| hsa04657 | IL-17 signaling pathway | 20/990 | 94/8157 | 0.00808884 | 0.157367579 | 0.139782803 | IL6/FOSB/FOSL1/CCL2/PTGS2/CXCL10/TRADD/IKBKB/TRAF3IP2/FOS/CXCL1/CSF3/CCL7/MAPK9/IL1B/MAPK4/MAP3K7/JUN/CXCL2/TRAF3 | 20 |
| hsa05168 | Herpes simplex virus 1 infection | 78/990 | 495/8157 | 0.008120814 | 0.157367579 | 0.139782803 | IL6/OAS1/ZNF605/CCL2/ZNF564/ZNF248/SOCS3/ZNF627/TRADD/IKBKB/ZNF763/ZNF555/ZNF585B/ZNF780B/TNFRSF1A/ZNF766/ZFP30/ZNF616/ZNF606/ZNF226/ZNF436/ZFP14/RNASEL/ZNF680/ZNF302/ZNF468/ZNF331/ZNF568/HCFC2/ZNF177/ZNF33B/ZNF84/ZNF57/DDX58/APAF1/ZNF780A/ZNF552/ZNF566/ZNF30/ZNF350/IL1B/ZNF714/ZNF224/ZNF33A/FAS/OAS2/ZNF772/ZNF761/ZNF584/ZNF823/CCL5/ZNF596/ZNF514/ZNF214/TLR3/ZNF582/ZNF83/BST2/ZNF429/ZNF544/MAP3K7/IFIH1/ZNF234/ZNF132/ZNF671/TICAM1/ZFP90/HLA-A/ZNF420/ZNF383/ZNF14/OAS3/IFNA8/TRAF3/ZNF441/ZNF773/ZNF597/EIF2AK2 | 78 |
| hsa05120 | Epithelial cell signaling in Helicobacter pylori infection | 16/990 | 70/8157 | 0.008462404 | 0.157367579 | 0.139782803 | IKBKB/CSK/HBEGF/MAP3K14/CXCL1/ATP6V0D1/MAPK9/RAC1/ATP6V1B2/CCL5/ATP6V1A/JUN/CXCL2/ATP6V1D/ATP6V1E2/ATP6V1H | 16 |
| hsa05165 | Human papillomavirus infection | 55/990 | 331/8157 | 0.008757814 | 0.157367579 | 0.139782803 | TCF7L1/PTGS2/FOXO1/TCF7L2/TRADD/IKBKB/TNXB/WNT3/SPP1/TNR/WNT5A/PARD6B/TNFRSF1A/ITGB8/TUBG1/CDK6/ATP6V0D1/LAMA4/AXIN1/THBS1/ITGB7/ISG15/LAMC2/COL1A2/CREB3L3/CDKN1B/FAS/TUBG2/OASL/COL4A3/ATP6V1B2/MFNG/CREB3L4/TLR3/CDKN1A/VEGFA/ATP6V1A/RBL1/ITGA6/PRKACB/MAML1/PPP2R5B/TICAM1/HLA-A/ATP6V1D/ATP6V1E2/MAGI1/AXIN2/VWF/IFNA8/TRAF3/LAMA3/ATP6V1H/ITGA10/EIF2AK2 | 55 |
| hsa05142 | Chagas disease | 21/990 | 102/8157 | 0.009905731 | 0.157367579 | 0.139782803 | IL6/CCL2/IKBKB/CD3G/TNFRSF1A/FOS/IL10/TGFB3/GNA11/TGFBR2/GNAI1/GNA15/PLCB1/SERPINE1/MAPK9/IL1B/FAS/CD3E/CCL5/JUN/TICAM1 | 21 |
| hsa05146 | Amoebiasis | 21/990 | 102/8157 | 0.009905731 | 0.157367579 | 0.139782803 | IL6/PRDX1/IL10/TGFB3/GNA11/SERPINB9/CXCL1/LAMA4/ARG2/LAMC2/GNA15/PLCB1/COL1A2/IL1B/CTSG/VCL/COL4A3/SERPINB6/CXCL2/PRKACB/LAMA3 | 21 |
| hsa05167 | Kaposi sarcoma-associated herpesvirus infection | 35/990 | 194/8157 | 0.009924082 | 0.157367579 | 0.139782803 | IL6/TCF7L1/MYC/PTGS2/TCF7L2/ZFP36/TRADD/IKBKB/ITPR1/TNFRSF1A/FOS/CALML4/CXCL1/CDK6/CALM3/MAPKAPK2/MICB/NFATC2/ICAM1/MAPK9/FAS/RAC1/MICA/TLR3/CDKN1A/VEGFA/NFATC4/JUN/CXCL2/MAP1LC3B/TICAM1/HLA-A/IFNA8/TRAF3/EIF2AK2 | 35 |
| hsa04934 | Cushing syndrome | 29/990 | 155/8157 | 0.0110183 | 0.162818704 | 0.144624801 | NR4A1/TCF7L1/TCF7L2/WNT3/WNT5A/ITPR1/GNA11/RASD1/CYP11A1/CDK6/GNAI1/AXIN1/LDLR/ORAI1/PLCB1/CRHR2/CREB3L3/CDKN1B/AIPL1/CACNA1I/PDE11A/ASH2L/CREB3L4/CDKN1A/ADCY6/PRKACB/CYP21A2/AXIN2/CACNA1G | 29 |
| hsa04064 | NF-kappa B signaling pathway | 21/990 | 104/8157 | 0.012330771 | 0.162818704 | 0.144624801 | PTGS2/TRADD/IKBKB/GADD45B/LTBR/TNFRSF1A/MAP3K14/CXCL1/LCK/DDX58/EDAR/GADD45G/ICAM1/IL1B/CD40LG/MAP3K7/CXCL2/EDARADD/TICAM1/TRAF3/BCL2A1 | 21 |
| hsa04620 | Toll-like receptor signaling pathway | 21/990 | 104/8157 | 0.012330771 | 0.162818704 | 0.144624801 | IL6/CXCL9/CXCL10/IKBKB/SPP1/FOS/MAP3K8/TLR7/TLR8/CXCL11/MAPK9/IL1B/RAC1/CCL5/TLR3/MAP3K7/JUN/TLR1/TICAM1/IFNA8/TRAF3 | 21 |
| hsa00900 | Terpenoid backbone biosynthesis | 7/990 | 22/8157 | 0.012483226 | 0.162818704 | 0.144624801 | DHDDS/PMVK/HMGCS1/PCYOX1/PDSS2/MVK/IDI1 | 7 |
| hsa04115 | p53 signaling pathway | 16/990 | 73/8157 | 0.012712572 | 0.162818704 | 0.144624801 | CCNG2/GADD45B/SFN/TP53I3/CDK6/TNFRSF10B/THBS1/CHEK1/APAF1/GADD45G/SERPINE1/FAS/CDKN1A/AIFM2/SERPINB5/EI24 | 16 |
| hsa03410 | Base excision repair | 9/990 | 33/8157 | 0.014215025 | 0.169057266 | 0.150166245 | PCNA/POLB/PARP2/FEN1/POLE2/NEIL2/POLD1/OGG1/LIG3 | 9 |
| hsa04130 | SNARE interactions in vesicular transport | 9/990 | 33/8157 | 0.014215025 | 0.169057266 | 0.150166245 | VAMP5/GOSR1/STX7/STX8/STX18/GOSR2/STX17/VAMP3/BET1 | 9 |
| hsa05162 | Measles | 26/990 | 139/8157 | 0.015563077 | 0.178707054 | 0.158737734 | IL6/OAS1/TRADD/IKBKB/CD3G/FOS/CDK6/TLR7/DDX58/APAF1/CDKN1B/MAPK9/IL1B/FAS/EIF3H/HSPA2/OAS2/JAK3/CD3E/MAP3K7/IFIH1/JUN/OAS3/IFNA8/TRAF3/EIF2AK2 | 26 |
| hsa04350 | TGF-beta signaling pathway | 19/990 | 94/8157 | 0.016591758 | 0.179611668 | 0.159541264 | MYC/INHBB/TGFB3/TGFBR2/SMAD3/THBS1/GREM2/ACVR2B/LTBP1/BMP5/RBX1/INHBE/CHRD/GDF5/RGMA/BMPR1A/ID4/RBL1/ROCK1 | 19 |
| hsa04924 | Renin secretion | 15/990 | 69/8157 | 0.016720606 | 0.179611668 | 0.159541264 | EDN1/EDN3/ITPR1/ADRB2/CALML4/PTGER2/ADCYAP1/GNAI1/CALM3/ORAI1/PLCB1/CLCA1/ADCY6/ADRB1/PRKACB | 15 |
| hsa05161 | Hepatitis B | 29/990 | 162/8157 | 0.019665721 | 0.204646414 | 0.181778543 | IL6/MYC/IKBKB/EGR3/PCNA/YWHAZ/FOS/TGFB3/TGFBR2/SMAD3/VDAC3/DDX58/CREB3L3/APAF1/NFATC2/MAPK9/FAS/JAK3/CREB3L4/TLR3/CDKN1A/MAP3K7/IFIH1/NFATC4/JUN/TICAM1/DDX3X/IFNA8/TRAF3 | 29 |
| hsa04927 | Cortisol synthesis and secretion | 14/990 | 65/8157 | 0.02200663 | 0.22023961 | 0.195629304 | NR4A1/ITPR1/GNA11/CYP11A1/LDLR/ORAI1/PLCB1/CREB3L3/CACNA1I/CREB3L4/ADCY6/PRKACB/CYP21A2/CACNA1G | 14 |
| hsa03420 | Nucleotide excision repair | 11/990 | 47/8157 | 0.022486927 | 0.22023961 | 0.195629304 | CETN2/GTF2H5/PCNA/RFC1/RFC3/RBX1/XPA/POLE2/POLD1/ERCC8/RFC5 | 11 |
| hsa00100 | Steroid biosynthesis | 6/990 | 20/8157 | 0.027198897 | 0.251382901 | 0.22329254 | SQLE/FDFT1/CYP27B1/LIPA/NSDHL/CYP2R1 | 6 |
| hsa00604 | Glycosphingolipid biosynthesis - ganglio series | 5/990 | 15/8157 | 0.027574079 | 0.251382901 | 0.22329254 | ST6GALNAC6/ST3GAL5/HEXA/ST8SIA5/SLC33A1 | 5 |
| hsa04110 | Cell cycle | 23/990 | 126/8157 | 0.028570072 | 0.251382901 | 0.22329254 | MYC/GADD45B/SFN/PCNA/YWHAZ/ANAPC7/TGFB3/MAD2L1/SMAD3/CDK6/MCM5/CDC23/PTTG1/SKP2/RBX1/MCM6/CHEK1/GADD45G/CDKN1B/ANAPC11/BUB1/CDKN1A/RBL1 | 23 |
| hsa04928 | Parathyroid hormone synthesis, secretion and action | 20/990 | 106/8157 | 0.028686337 | 0.251382901 | 0.22329254 | FGFR1/EGR1/NR4A2/ITPR1/HBEGF/FOS/GNA11/GNAI1/PDE4D/PLCB1/SLC34A3/CREB3L3/MAFB/MMP25/CYP27B1/CREB3L4/CDKN1A/ADCY6/PRKACB/KL | 20 |
| hsa00520 | Amino sugar and nucleotide sugar metabolism | 11/990 | 49/8157 | 0.030074954 | 0.256153977 | 0.227530481 | CMAS/GCK/NPL/CYB5R2/GFPT2/GNPDA1/GALK2/HEXA/CYB5RL/CYB5R4/GALT | 11 |
| hsa04512 | ECM-receptor interaction | 17/990 | 88/8157 | 0.033899536 | 0.256153977 | 0.227530481 | SDC4/TNXB/SPP1/TNR/ITGB8/HMMR/LAMA4/THBS1/ITGB7/LAMC2/COL1A2/COL4A3/SV2A/ITGA6/VWF/LAMA3/ITGA10 | 17 |
| hsa04936 | Alcoholic liver disease | 25/990 | 142/8157 | 0.034558785 | 0.256153977 | 0.227530481 | IL6/TCF7L1/FOXO1/TCF7L2/TRADD/IKBKB/ADH5/PPARGC1A/TNFRSF1A/MAP3K14/PRKAA2/CXCL1/PRKAB2/MAPK9/IL1B/FAS/FOXO3/CPT1C/MAP3K7/CXCL2/TICAM1/IFNA8/TRAF3/PRKAG1/C5AR1 | 25 |
| hsa05340 | Primary immunodeficiency | 9/990 | 38/8157 | 0.034644373 | 0.256153977 | 0.227530481 | RFX5/ORAI1/LCK/CD19/DCLRE1C/JAK3/CD3E/CD40LG/RAG2 | 9 |
| hsa04218 | Cellular senescence | 27/990 | 156/8157 | 0.035085399 | 0.256153977 | 0.227530481 | IL6/MYC/FOXO1/GADD45B/LIN52/ITPR1/TRAF3IP2/TGFB3/TGFBR2/SMAD3/CALML4/CDK6/CALM3/RBBP4/MAPKAPK2/VDAC3/CHEK1/NFATC2/GADD45G/SERPINE1/FOXO3/CDKN1A/HIPK2/ZFP36L2/NFATC4/RBL1/HLA-A | 27 |
| hsa04621 | NOD-like receptor signaling pathway | 31/990 | 184/8157 | 0.035308201 | 0.256153977 | 0.227530481 | IL6/OAS1/CCL2/IKBKB/CASP1/CARD16/ITPR1/GBP5/CXCL1/GBP7/RNASEL/VDAC3/PLCB1/MAPK9/IL1B/OAS2/CCL5/NAMPT/MAP3K7/JUN/CXCL2/TRIP6/MAP1LC3B/NLRP12/TICAM1/DEFB103A/NEK7/OAS3/IFNA8/TRAF3/TP53BP1 | 31 |
| hsa04310 | Wnt signaling pathway | 29/990 | 170/8157 | 0.035315455 | 0.256153977 | 0.227530481 | TCF7L1/FOSL1/MYC/TCF7L2/WNT3/RNF43/WNT5A/SMAD3/SOX17/CBY1/AXIN1/INVS/CSNK1E/RBX1/PLCB1/NFATC2/NKD2/FRAT1/MAPK9/RAC1/TLE2/RSPO1/MAP3K7/NFATC4/JUN/PRKACB/AXIN2/DKK1/DKK4 | 29 |
| hsa04920 | Adipocytokine signaling pathway | 14/990 | 69/8157 | 0.035384633 | 0.256153977 | 0.227530481 | SOCS3/TRADD/IKBKB/PPARGC1A/TNFRSF1A/PRKAA2/PRKAB2/MAPK9/TNFRSF1B/LEPR/NPY/CPT1C/IRS2/PRKAG1 | 14 |
| hsa04210 | Apoptosis | 24/990 | 136/8157 | 0.036900683 | 0.261445266 | 0.232230503 | ERN1/TRADD/IKBKB/GADD45B/ITPR1/TNFRSF1A/FOS/MAP3K14/PARP2/TNFRSF10B/CTSZ/APAF1/CSF2RB/GADD45G/MAPK9/FAS/TNFSF10/DFFA/ACTB/BCL2L11/JUN/TUBA8/CASP6/BCL2A1 | 24 |
| hsa04966 | Collecting duct acid secretion | 7/990 | 27/8157 | 0.038008886 | 0.263686649 | 0.234221427 | ATP6V0D1/ATP6V1B2/ATP6V1A/ATP6V1D/ATP6V1E2/ATP4B/ATP4A | 7 |
| hsa05417 | Lipid and atherosclerosis | 35/990 | 215/8157 | 0.041596956 | 0.282689515 | 0.25110085 | IL6/CCL2/ERN1/IKBKB/CASP1/ITPR1/TNFRSF1A/FOS/CALML4/CXCL1/TNFRSF10B/CALM3/LDLR/MIB1/PLCB1/APAF1/NFATC2/ICAM1/MAPK9/NOS3/IL1B/FAS/RAC1/TNFSF10/HSPA2/CCL5/CD40LG/MAP3K7/JUN/CXCL2/NFE2L2/TICAM1/CASP6/IFNA8/TRAF3 | 35 |
| hsa00650 | Butanoate metabolism | 7/990 | 28/8157 | 0.045562651 | 0.301967655 | 0.268224786 | OXCT2/ACSM2B/GAD2/HMGCS1/L2HGDH/HADH/BDH1 | 7 |
| hsa04925 | Aldosterone synthesis and secretion | 18/990 | 98/8157 | 0.046247298 | 0.301967655 | 0.268224786 | NR4A1/NR4A2/ITPR1/GNA11/CYP11A1/CALML4/ATP2B4/CALM3/LDLR/ORAI1/PLCB1/CREB3L3/CACNA1I/CREB3L4/ADCY6/PRKACB/CYP21A2/CACNA1G | 18 |
| hsa05222 | Small cell lung cancer | 17/990 | 92/8157 | 0.049246874 | 0.315369403 | 0.280128979 | MYC/PTGS2/IKBKB/GADD45B/CDK6/LAMA4/LAMC2/SKP2/APAF1/GADD45G/CDKN1B/COL4A3/CDKN1A/ITGA6/CKS1B/TRAF3/LAMA3 | 17 |
