# Supplementary material for: Identification of Fatty acid metabolism-Related Genes in the Progression from Non-Alcoholic Fatty Liver to Nonalcoholic fatty liver disease
Source: Research Square preprint supplement (doi:10.21203/rs.3.rs-5030401/v1), 2024-10-21
Supplement: Supplementary file 2 [file 10e18464e569984ab9116716.docx]

**Reagents**

DMEM contains l-L-Glutamine (BI, USA), fetal bovine serum (BI, USA), oleic acid (Sigma-Aldrich, USA), palmitic acid (Sigma-Aldrich, USA), bovine serum albumin (Meilunbio, Dalian, China), Lipi-Red (DOJINDO, Japan). Oil red O staining and triglyceride enzyme method assay kits were purchased from Applygen (Beijing, China).TRIzol (Invitrogen, Shanghai, China), HiScript Ⅲ All-in-one RT SuperMix and Taq Pro Universal SYBR qPCR Master Mix for qPCR were purchased from Vazyme (Nanjing, China). The primers for qPCR were designed and synthesized by Sangon Biotech (GAPDH-F: CCCATCACCATCTTCCAGG; GAPDH-R: CATCACGCCACAGTTTCCC, FMO1-F: GCCAAGCGAGTTGCCATTG; FMO1-R: CACAGACTTGTAGAGACTGGCT). RIPA (Meilunbio, Dalian, China), Antibodies for glyceraldehyde-3-phosphate dehydrogenase (GAPDH) (2118) was purchased from Cell Signaling Technology (USA), antibodies for FMO1 (A25236) was purchased from ABclonal Technology (Wuhan, China).

**Free fatty acids preparation**

Prepare FFA-free BSA solution by dissolving 2g of FFA-free BSA in 20ml of PBS at 55°C for 30 minutes. Store it at -20°C. For Palmitic Acid (PA), dissolve 0.01g of PA in 1.95ml of 20% FFA-free BSA solution at 70°C for 30 minutes. Prepare a 20mM PA stock solution and store it at -20°C. For Oleic Acid (OA), dissolve 1g of OA in 17.5ml of anhydrous ethanol, dilute 10 times with 20% FFA-free BSA solution, and heat at 55°C for 30 minutes. Prepare a 20mM OA stock solution and store it long-term at -20°C in the dark. Mix OA and PA at a ratio of 2:1 to prepare a 20mM FFA stock solution. Store it at -20°C.

**Oil red O Staining**

The Oil Red O staining solution was prepared by combining Oil Red O solution A and B at a 3:2 ratio and allowing it to stand for 10 minutes, with filtration in case of precipitation. Subsequently, the cell culture medium was aspirated and the cells were washed with PBS for 1-2 times before fixation with Fixative Reagent A for 25-30 minutes. After fixation, the cells were rinsed twice with double distilled water and treated with 60% isopropanol for 5 minutes. Following the removal of isopropanol, cells were incubated with 1-2ml of freshly prepared staining solution for 15-20 minutes. Subsequent to staining, the cells were washed thoroughly with double distilled water until no apparent dye residue remained. Nuclei were then stained with Mayer's hematoxylin staining solution for 1-2 minutes, followed by rinsing with double distilled water. A 1-minute treatment with ORO Buffer was conducted before discarding. Finally, an appropriate volume of double distilled water was added to the six-well plate for observation of cell staining results under a microscope.

**Lipi-Red** **Staining**

Initially, 100ul of DMSO was added to the Lipi-Red vial and thoroughly mixed by vortexing to prepare a 1mmol/L Lipi-Red DMSO stock solution, which was stored long-term at -20°C. Prior to experimentation, the Lipi-Red stock solution was diluted with PBS or serum-free medium to a final concentration of 1-5umol/L. Subsequently, cell seeding was performed on culture dishes for adherence, followed by overnight incubation at 37°C in a 5% CO2 humidified atmosphere. The culture medium was then removed, and cells were washed twice with PBS. Lipi-Red working solution was added, and cells were incubated for 30 minutes at 37°C in a 5% CO2 incubator. Finally, cell staining was observed under a fluorescence microscope.

**Triglyceride enzymatic assay**

Cells were lysed with 300-500ul of buffer for 10 minutes at room temperature. The lysate was then heated at 70ºC for 5-10 minutes and centrifuged at 3000rpm for 5-10 minutes. The supernatant was collected for analysis. Triglyceride concentration was determined by incubating samples in a 96-well plate at 37ºC or room temperature for 15-20 minutes. OD values were measured at 550nm, and concentration of triglycerides was calculated by plotting a standard curve using the OD values of each standard tube on the Y-axis and the concentration of the standard solution on the X-axis.

**qRT-PCR**

Total RNA was extracted from HepG2 cells using the standard TRIzol method according to the manufacturer's instructions. HiScript Ⅲ All-in-one RT SuperMix was used to transcribe the RNA to cDNA reversely. Quantitative real-time PCR was carried out using a Taq Pro Universal SYBR

qPCR Master Mix Kit ABI Prism 7900 real-time PCR System (ThermoFisher, USA). The relative expression levels of target genes were calculated using the ΔΔCT method, which were normalized to GAPDH expression.

**Western blot**

Cells were lysed in radioimmunoprecipitation assay (RIPA) added with protease and phosphatase inhibitor. Proteins were separated by sodium dodecyl sulfate-polyacrylamide gel electrophoresis (SDS-PAGE) and transferred to polyvinylidene fluoride membranes (Millipore, Germany). Membranes were blocked with 5% nonfat milk in tris-buffered saline containing 0.05% Tween-20 (TBST) for 2 hour at room temperature, followed by primary antibody incubations overnight at 4°C. After three washes with TBST, the membranes were then incubated with the horseradish peroxidase (HRP)-conjugated secondary antibodies (1:10000) for 2h. After three washes with TBST, an enhanced ECL kit (Meilunbio, Dalian, China) was used for detection.
