# Supplementary material for: Identification of Fatty acid metabolism-Related Genes in the Progression from Non-Alcoholic Fatty Liver to Nonalcoholic fatty liver disease
Source: Research Square preprint supplement (doi:10.21203/rs.3.rs-5030401/v1), 2024-10-21
Supplement: Supplementary file 4 [file 2518d5ebb22acba7f0a6a5c5.docx]

| Genes | LogFC | P.Value | Adj.P.Val |
| --- | --- | --- | --- |
| **Upregulated** | | | |
| CYP7A1 | 1.75638974 | 1.34E-12 | 2.09E-08 |
| AKR1B10 | 0.900710605 | 3.61E-06 | 0.000550813 |
| PEG10 | 0.897731319 | 1.04E-07 | 7.06E-05 |
| EEF1A2 | 0.656746778 | 2.07E-06 | 0.000384217 |
| LGALS4 | 0.631915661 | 0.000121945 | 0.004673688 |
| FMO1 | 0.601802555 | 9.46E-07 | 0.000237337 |
| FABP4 | 0.56854776 | 3.10E-06 | 0.000500813 |
| GPAM | 0.558085613 | 1.51E-07 | 8.70E-05 |
| CXCL9 | 0.553742051 | 6.83E-07 | 0.000204219 |
| KRT222 | 0.546888643 | 4.20E-07 | 0.000154657 |
| MEP1B | 0.543598338 | 8.66E-06 | 0.000962508 |
| LRRC31 | 0.509218884 | 4.10E-06 | 0.000601567 |
| ME1 | 0.499349681 | 3.00E-06 | 0.000495843 |
| TRHDE | 0.498831803 | 7.50E-07 | 0.000218692 |
| SPP1 | 0.490670668 | 2.96E-05 | 0.001932952 |
| GINS2 | 0.4798009 | 7.11E-06 | 0.000851068 |
| ACE2 | 0.46902241 | 1.34E-06 | 0.000293902 |
| CXCL10 | 0.467553989 | 1.22E-05 | 0.001185339 |
| TYMS | 0.456183134 | 1.16E-07 | 7.22E-05 |
| RNF43 | 0.453859788 | 2.15E-05 | 0.001665597 |
| SQLE | 0.45004682 | 4.15E-05 | 0.002423589 |
| PPP1R3C | 0.443368542 | 3.97E-05 | 0.002348778 |
| ANKS4B | 0.443261824 | 3.13E-05 | 0.001996712 |
| OAS1 | 0.439921444 | 4.74E-07 | 0.000154657 |
| RTP4 | 0.435202107 | 1.36E-05 | 0.001270201 |
| C11orf52 | 0.43079369 | 8.27E-07 | 0.000229612 |
| RTP3 | 0.426694928 | 0.001911988 | 0.024336968 |
| IFIT2 | 0.418089926 | 5.68E-06 | 0.000729974 |
| NOL4 | 0.414593756 | 7.43E-05 | 0.003431535 |
| NINL | 0.404188528 | 1.94E-05 | 0.001575825 |
| CD3G | 0.403283977 | 4.68E-05 | 0.002572066 |
| NCAM2 | 0.402371849 | 0.006357348 | 0.04814669 |
| BTN3A2 | 0.40167336 | 1.79E-07 | 9.62E-05 |
| CHST9 | 0.401177122 | 0.000291089 | 0.008042951 |
| SPTLC3 | 0.400624823 | 0.00010277 | 0.004263187 |
| WNT5A | 0.397098727 | 3.73E-05 | 0.00222638 |
| ANXA13 | 0.39633069 | 0.000107048 | 0.004370697 |
| ISM1 | 0.395514605 | 1.72E-05 | 0.001444969 |
| PDZK1 | 0.393720844 | 4.99E-06 | 0.000674882 |
| UBD | 0.393191107 | 0.001595969 | 0.021812631 |
| ADH5 | 0.392644939 | 4.21E-05 | 0.002423589 |
| LPL | 0.38479783 | 0.000146865 | 0.005111046 |
| CNTNAP2 | 0.384296038 | 1.44E-05 | 0.001325425 |
| RAB26 | 0.38316089 | 2.16E-05 | 0.001665879 |
| GBP5 | 0.382825687 | 8.00E-05 | 0.003617533 |
| TMEM98 | 0.381296603 | 4.72E-06 | 0.000650425 |
| GCK | 0.379401691 | 1.86E-06 | 0.000366756 |
| ACOT12 | 0.377192432 | 2.90E-08 | 3.01E-05 |
| PRKAA2 | 0.376220885 | 0.000178708 | 0.005782834 |
| DDO | 0.375723091 | 2.71E-07 | 0.000120662 |
| FRMD7 | 0.371326022 | 4.39E-07 | 0.000154657 |
| GIMAP2 | 0.370290381 | 0.000115907 | 0.004572643 |
| NCAPG2 | 0.370262935 | 0.000144172 | 0.005097148 |
| IFI27 | 0.367969022 | 0.00183767 | 0.023882031 |
| MSH2 | 0.365321766 | 1.00E-07 | 7.06E-05 |
| CEBPA | 0.365051876 | 0.00559294 | 0.044824202 |
| IFI6 | 0.363844885 | 0.000114209 | 0.004565548 |
| CD24 | 0.363690956 | 1.80E-05 | 0.001484117 |
| CKAP2 | 0.362988303 | 0.00012198 | 0.004673688 |
| FNDC5 | 0.361756365 | 0.001774756 | 0.023350095 |
| TMEM154 | 0.360077952 | 0.005647727 | 0.045008222 |
| TRPM8 | 0.359720929 | 0.004934226 | 0.041818315 |
| IFIT3 | 0.356523741 | 7.28E-05 | 0.003416793 |
| SLC7A6OS | 0.35193685 | 1.65E-05 | 0.001423212 |
| SLC12A1 | 0.351778822 | 0.000187233 | 0.005956241 |
| MAMDC4 | 0.349830694 | 0.000635981 | 0.012507359 |
| GPNMB | 0.34942678 | 0.000301286 | 0.008208058 |
| PRSS3 | 0.349402119 | 0.000576483 | 0.011705886 |
| SPATA18 | 0.34829474 | 0.000755129 | 0.01391414 |
| ELMOD2 | 0.344075816 | 8.27E-05 | 0.003705717 |
| KLB | 0.341476476 | 5.61E-06 | 0.000727129 |
| CCDC146 | 0.341411697 | 7.77E-06 | 0.000902795 |
| ASPM | 0.338959948 | 2.04E-05 | 0.001609833 |
| NUSAP1 | 0.338021511 | 6.42E-07 | 0.000195782 |
| CNTLN | 0.336453678 | 7.76E-06 | 0.000902795 |
| NOL3 | 0.336142101 | 2.63E-05 | 0.001834565 |
| HDAC8 | 0.334940002 | 2.01E-06 | 0.000384217 |
| SLC25A34 | 0.334857896 | 0.005138378 | 0.042961432 |
| LRIG3 | 0.333983402 | 0.000732332 | 0.013638195 |
| GRIA3 | 0.33209189 | 0.000227892 | 0.006870336 |
| TMEM19 | 0.331562816 | 9.12E-07 | 0.000234542 |
| BCAR3 | 0.329782246 | 4.60E-06 | 0.000644271 |
| FABP5 | 0.329436191 | 0.003401961 | 0.034054639 |
| SAMD3 | 0.328988277 | 1.01E-05 | 0.001053452 |
| UGT2A3 | 0.328950597 | 0.000164533 | 0.00544568 |
| MPHOSPH9 | 0.328205031 | 0.000114462 | 0.004565548 |
| AFP | 0.327102692 | 0.001400533 | 0.020347657 |
| NPR3 | 0.32624185 | 0.000116886 | 0.004572643 |
| BTN3A1 | 0.32429511 | 9.70E-06 | 0.001033972 |
| INHBE | 0.322781877 | 0.000983805 | 0.016299748 |
| TBX15 | 0.32075293 | 0.002435037 | 0.027996624 |
| BBS10 | 0.31923072 | 0.000141181 | 0.005089563 |
| THRSP | 0.318709843 | 0.001093743 | 0.017432645 |
| ING4 | 0.31486606 | 5.53E-05 | 0.002904313 |
| OXT | 0.314748583 | 0.005539673 | 0.044604116 |
| FAM13A | 0.31468814 | 9.84E-07 | 0.000239283 |
| TOP2A | 0.314042887 | 0.000216665 | 0.006595775 |
| ANKRD50 | 0.312660387 | 0.000103598 | 0.004278566 |
| HEXIM1 | 0.312536867 | 0.00019061 | 0.006051285 |
| NDC80 | 0.312119836 | 2.11E-07 | 0.000104645 |
| PCDH18 | 0.310235326 | 0.000237625 | 0.007081421 |
| CCNG2 | 0.310210719 | 2.02E-07 | 0.000104645 |
| ZNF28 | 0.310052139 | 4.77E-07 | 0.000154657 |
| TMEM169 | 0.309848485 | 0.000357283 | 0.008937553 |
| TRIM55 | 0.30977248 | 0.002506691 | 0.028504444 |
| TBC1D8B | 0.309210694 | 3.23E-05 | 0.002040385 |
| SIRT4 | 0.308953268 | 0.000105489 | 0.004329786 |
| PDP2 | 0.308023058 | 0.000119479 | 0.00461533 |
| CASP1 | 0.307674676 | 2.93E-05 | 0.001929664 |
| TBX10 | 0.306883766 | 0.000199783 | 0.006228114 |
| CASP8AP2 | 0.306572777 | 7.29E-05 | 0.003416793 |
| ZNF605 | 0.30540154 | 8.23E-07 | 0.000229612 |
| RBP5 | 0.305212042 | 0.001734674 | 0.02304585 |
| REEP4 | 0.305153649 | 5.70E-05 | 0.00294594 |
| ENO3 | 0.305090481 | 0.002871834 | 0.03076431 |
| PIN4 | 0.304539528 | 0.000118639 | 0.004603387 |
| ABCC4 | 0.304401715 | 0.000367091 | 0.009007093 |
| LYRM2 | 0.304096861 | 0.000757603 | 0.01391414 |
| CARD16 | 0.303859357 | 3.02E-05 | 0.0019477 |
| RMND1 | 0.303203419 | 4.58E-05 | 0.002534402 |
| UBTD2 | 0.302492232 | 1.02E-08 | 1.59E-05 |
| ARMCX6 | 0.301797277 | 6.33E-07 | 0.000195782 |
| SYTL5 | 0.30142365 | 7.87E-05 | 0.003580212 |
| TFB1M | 0.301179037 | 0.000108917 | 0.004423812 |
| MRGPRF | 0.300288761 | 4.65E-05 | 0.002565123 |
| VPS45 | 0.300189397 | 1.76E-07 | 9.62E-05 |
| TRIM22 | 0.299869208 | 4.11E-05 | 0.002423545 |
| ACP5 | 0.29931526 | 7.69E-05 | 0.003516193 |
| IL32 | 0.299238911 | 0.006161493 | 0.047457803 |
| FRAT1 | 0.299118916 | 0.001458674 | 0.020826531 |
| ITGBL1 | 0.298889483 | 0.000248113 | 0.007266904 |
| FAM47E | 0.298707712 | 0.001848059 | 0.023976983 |
| CHRNB1 | 0.296775063 | 0.001036182 | 0.016878379 |
| NHEJ1 | 0.296493493 | 2.85E-06 | 0.000487902 |
| FIGNL1 | 0.295686293 | 3.92E-07 | 0.000154657 |
| CDK5RAP2 | 0.295375117 | 8.37E-06 | 0.00095093 |
| CSTA | 0.294543122 | 0.000264925 | 0.00759843 |
| TP53I3 | 0.294080791 | 5.68E-05 | 0.00294594 |
| AKTIP | 0.292551954 | 4.63E-07 | 0.000154657 |
| SGCB | 0.291365114 | 9.16E-05 | 0.003927403 |
| GNAI1 | 0.289924879 | 0.000402433 | 0.009652841 |
| UBXN2B | 0.289648476 | 6.85E-08 | 5.92E-05 |
| ANKRD29 | 0.289568888 | 0.000756239 | 0.01391414 |
| FANCL | 0.289485854 | 0.000896259 | 0.015371788 |
| CHMP4A | 0.289018814 | 0.000467745 | 0.010419382 |
| USP18 | 0.289006023 | 0.00270262 | 0.029621508 |
| ZFP14 | 0.288986931 | 0.000398524 | 0.009611544 |
| C11orf80 | 0.288301566 | 5.26E-05 | 0.002802247 |
| FNBP1L | 0.287896884 | 1.09E-06 | 0.000250448 |
| FRK | 0.287685971 | 2.39E-05 | 0.00176432 |
| HSDL1 | 0.286755524 | 5.04E-06 | 0.000676112 |
| FKBP14 | 0.286703396 | 1.12E-06 | 0.000252045 |
| HMGCS1 | 0.286514873 | 0.00185131 | 0.023996926 |
| MPP6 | 0.285741169 | 0.000665923 | 0.012916574 |
| APOL3 | 0.285619075 | 0.000534667 | 0.011180363 |
| SLC1A7 | 0.283663688 | 0.000248521 | 0.007266904 |
| SLC5A9 | 0.283078537 | 0.00189599 | 0.024215119 |
| ABHD10 | 0.282801586 | 4.27E-06 | 0.000610064 |
| RWDD2B | 0.282462949 | 0.00053734 | 0.011194707 |
| CSAD | 0.281668465 | 1.48E-05 | 0.001334332 |
| ZDHHC2 | 0.281519619 | 0.000562395 | 0.011511345 |
| STMN2 | 0.280975063 | 0.002760596 | 0.030020742 |
| CYB5R2 | 0.280106203 | 0.000183476 | 0.005897014 |
| KDELR3 | 0.279666509 | 0.000141879 | 0.005089563 |
| GBP7 | 0.279315744 | 0.000305172 | 0.008260825 |
| ANAPC7 | 0.278674761 | 7.01E-05 | 0.003316372 |
| DSN1 | 0.278566991 | 7.34E-08 | 6.01E-05 |
| TREM2 | 0.278540098 | 0.000510402 | 0.010974086 |
| GRAMD1C | 0.278484643 | 0.004061673 | 0.037592238 |
| CNTN3 | 0.278318707 | 0.000431451 | 0.010032727 |
| TNFSF10 | 0.278019815 | 0.002089724 | 0.025735402 |
| BMP5 | 0.27796951 | 0.000971876 | 0.016186838 |
| TIGD2 | 0.277372127 | 0.000127471 | 0.004801088 |
| NUPR1 | 0.275866772 | 3.01E-05 | 0.0019477 |
| ZNF33B | 0.275252037 | 0.000971541 | 0.016186838 |
| SLC22A7 | 0.275048916 | 0.000908232 | 0.015470396 |
| SCRN2 | 0.275044991 | 0.000295795 | 0.008144035 |
| COMMD2 | 0.274962126 | 0.001393155 | 0.020273073 |
| FBXO8 | 0.274451559 | 0.001735271 | 0.02304585 |
| THAP2 | 0.272982712 | 6.29E-05 | 0.003112037 |
| NIT2 | 0.272870078 | 0.00041687 | 0.009844421 |
| CCDC112 | 0.272830983 | 1.58E-05 | 0.001387129 |
| PTTG1 | 0.272526929 | 0.000739698 | 0.0137476 |
| DHDDS | 0.27243461 | 7.78E-06 | 0.000902795 |
| ANKRD55 | 0.272170925 | 0.000239714 | 0.007130013 |
| MICA | 0.272146115 | 0.002520856 | 0.028623678 |
| ART4 | 0.272007708 | 0.000330266 | 0.008578744 |
| C17orf75 | 0.271887727 | 9.93E-06 | 0.001051082 |
| COQ10A | 0.271567126 | 0.001736591 | 0.02304585 |
| VSNL1 | 0.271450933 | 0.001098348 | 0.017453242 |
| SPINT2 | 0.270754109 | 0.000707706 | 0.013360531 |
| CMAS | 0.270750508 | 4.31E-07 | 0.000154657 |
| SULF2 | 0.27061671 | 2.44E-05 | 0.001764696 |
| TBX3 | 0.270538724 | 0.0020979 | 0.025777986 |
| ARMC6 | 0.270531876 | 0.0008651 | 0.015079674 |
| CYP11A1 | 0.270489812 | 0.000223509 | 0.006777583 |
| ZNF780B | 0.270335339 | 5.29E-05 | 0.002806158 |
| ZNF117 | 0.270326345 | 0.000448285 | 0.010255181 |
| MTMR4 | 0.270019776 | 0.001200515 | 0.018472013 |
| PDE11A | 0.26875705 | 0.0022556 | 0.026866855 |
| ISG15 | 0.26872921 | 0.00081747 | 0.014566511 |
| GPR174 | 0.268289417 | 2.76E-05 | 0.001891738 |
| RABGAP1L | 0.268248218 | 2.42E-05 | 0.00176432 |
| TRIM5 | 0.268239181 | 2.78E-06 | 0.000485266 |
| DAO | 0.26806349 | 0.00029037 | 0.008042951 |
| NPM2 | 0.267910706 | 0.001169986 | 0.018163973 |
| UGT2B11 | 0.267631723 | 0.000256852 | 0.007440563 |
| VPS8 | 0.267231666 | 1.64E-05 | 0.001421441 |
| ZNF248 | 0.267086777 | 3.05E-06 | 0.000499216 |
| MCM5 | 0.266836734 | 0.000434376 | 0.010057988 |
| EDAR | 0.266496663 | 0.0013608 | 0.019932767 |
| MVK | 0.266292216 | 0.003261424 | 0.03335079 |
| AKR1A1 | 0.266070937 | 6.35E-08 | 5.81E-05 |
| PARD6B | 0.265942856 | 4.48E-05 | 0.002497028 |
| MPZL2 | 0.265673645 | 2.09E-05 | 0.001639158 |
| ITGB7 | 0.26564271 | 0.000495151 | 0.010742769 |
| MMAB | 0.26551668 | 0.000501127 | 0.010827121 |
| ACTR8 | 0.265450962 | 0.000124073 | 0.004730582 |
| DPH5 | 0.26511649 | 1.26E-05 | 0.001209876 |
| PLA2G7 | 0.264468518 | 0.000450294 | 0.010255891 |
| ZNF555 | 0.264329739 | 2.28E-05 | 0.001731911 |
| SLC25A40 | 0.262842466 | 0.00068351 | 0.01311059 |
| KLRG1 | 0.262795435 | 9.51E-06 | 0.00102961 |
| GPD1 | 0.262704814 | 0.000376543 | 0.00919545 |
| PSMD10 | 0.262683665 | 1.02E-05 | 0.001054458 |
| IFI44 | 0.262321485 | 0.000730547 | 0.013638195 |
| GSTA4 | 0.261821381 | 0.001038124 | 0.016887734 |
| PRKAB2 | 0.261813567 | 0.000282334 | 0.007970951 |
| FBXO27 | 0.261287954 | 0.001254533 | 0.019076752 |
| TPRG1 | 0.261233441 | 0.000541714 | 0.011265922 |
| CD160 | 0.260751021 | 0.000366242 | 0.009007093 |
| TTPA | 0.260135359 | 0.001107931 | 0.017533034 |
| CD2 | 0.259433716 | 4.96E-05 | 0.002687809 |
| FBXO2 | 0.259195896 | 0.003293646 | 0.033531386 |
| ZNF616 | 0.258991998 | 0.000170539 | 0.005610477 |
| RABIF | 0.258024186 | 4.38E-05 | 0.002469657 |
| CTSG | 0.257425531 | 0.00221779 | 0.026661465 |
| HDHD3 | 0.257256245 | 1.05E-05 | 0.001081125 |
| AMACR | 0.257167112 | 0.001192293 | 0.018404553 |
| ZNF564 | 0.25695917 | 2.92E-06 | 0.000491131 |
| GDPD4 | 0.256558318 | 2.39E-05 | 0.00176432 |
| ACSS3 | 0.256198873 | 0.001671047 | 0.022486864 |
| CLCN5 | 0.256061246 | 0.000178808 | 0.005782834 |
| KLHDC8B | 0.255739212 | 2.29E-05 | 0.001731911 |
| GUCA2B | 0.255164061 | 0.002392617 | 0.027900711 |
| NEB | 0.254731666 | 0.002229326 | 0.026712276 |
| P4HA2 | 0.25465723 | 8.92E-05 | 0.003879483 |
| KLHDC10 | 0.25365511 | 0.000129093 | 0.004815769 |
| DDX58 | 0.253549611 | 0.001226238 | 0.018756505 |
| TTPAL | 0.253182708 | 0.002088478 | 0.025735402 |
| MOGAT3 | 0.252925158 | 0.001715114 | 0.02287624 |
| COG4 | 0.252886581 | 5.79E-05 | 0.002961841 |
| ACBD5 | 0.252736814 | 0.000815138 | 0.014558317 |
| ALG1L | 0.252707859 | 0.002958485 | 0.031393446 |
| PLA2G1B | 0.252678726 | 0.000840099 | 0.014811891 |
| BRCA1 | 0.252404179 | 0.002274613 | 0.0270484 |
| ONECUT1 | 0.252181994 | 0.000789124 | 0.014273962 |
| STBD1 | 0.251924096 | 0.000447175 | 0.010244853 |
| GIMAP1 | 0.251918224 | 0.000161611 | 0.005364066 |
| CXCL11 | 0.251802077 | 0.001431265 | 0.020577409 |
| NAT1 | 0.251459416 | 0.00056734 | 0.011582081 |
| DTL | 0.251184236 | 8.90E-05 | 0.003879483 |
| RABL3 | 0.25087088 | 3.57E-05 | 0.002169809 |
| GFM2 | 0.250687871 | 0.000419571 | 0.009844421 |
| FPR3 | 0.25059689 | 0.000911229 | 0.01548761 |
| HPS3 | 0.250591446 | 0.00011546 | 0.004572643 |
| COL1A2 | 0.2504695 | 0.001023626 | 0.016743985 |
| OAS2 | 0.250260776 | 0.002132172 | 0.026137163 |
| DTNA | 0.250208314 | 0.0046846 | 0.04053039 |
| ASF1A | 0.250116086 | 0.000887451 | 0.015285812 |
| SLC35D1 | 0.24998818 | 0.001804057 | 0.023563311 |
| HTR2B | 0.249633234 | 0.001970901 | 0.024853876 |
| COMMD10 | 0.249539996 | 3.73E-05 | 0.00222638 |
| SLC39A11 | 0.248915252 | 0.003987279 | 0.037407834 |
| CDKN3 | 0.248347722 | 9.03E-07 | 0.000234542 |
| PRRG2 | 0.248214044 | 0.002699464 | 0.029614153 |
| HPGD | 0.248205545 | 0.00412455 | 0.037896927 |
| XPA | 0.247490272 | 0.001217797 | 0.018645722 |
| PPP1R3B | 0.247409624 | 0.002581008 | 0.028922728 |
| TLR7 | 0.246559554 | 0.000481689 | 0.010583552 |
| IMMP1L | 0.245563989 | 9.60E-05 | 0.004058637 |
| FCGBP | 0.245484519 | 0.006064374 | 0.047141417 |
| ZBTB41 | 0.243863369 | 0.002691293 | 0.02959616 |
| TSPAN12 | 0.242994428 | 0.000198437 | 0.006211047 |
| UEVLD | 0.242726307 | 8.87E-05 | 0.003879483 |
| IGSF3 | 0.242259445 | 0.000152216 | 0.005204115 |
| LAMA4 | 0.24223932 | 0.000403339 | 0.009652841 |
| TUBG2 | 0.241861893 | 0.001958481 | 0.024749088 |
| KLHL12 | 0.241469126 | 0.000333244 | 0.00860837 |
| CETN2 | 0.241195916 | 2.25E-07 | 0.000104645 |
| RSAD2 | 0.240207638 | 0.004278395 | 0.038560087 |
| NPL | 0.23992202 | 2.32E-05 | 0.001731911 |
| DMGDH | 0.239803765 | 0.002209347 | 0.02661669 |
| ARID4A | 0.239632718 | 9.89E-05 | 0.004145219 |
| FDFT1 | 0.239521787 | 0.000577167 | 0.011705886 |
| SCFD1 | 0.239237513 | 0.002601722 | 0.029034497 |
| GZMA | 0.239217543 | 0.000290994 | 0.008042951 |
| BST2 | 0.239169601 | 0.003382263 | 0.033937998 |
| CX3CR1 | 0.238549236 | 0.000305764 | 0.008260825 |
| DBI | 0.238213333 | 0.004324798 | 0.038849909 |
| GPX8 | 0.237917683 | 0.002404854 | 0.02793081 |
| COX15 | 0.237888775 | 0.000142928 | 0.005089563 |
| TLR1 | 0.237711525 | 0.00491775 | 0.04173514 |
| ELOVL6 | 0.237702781 | 0.001699351 | 0.022730093 |
| MREG | 0.237520095 | 0.004011074 | 0.037407834 |
| NHLRC1 | 0.237488145 | 0.004837395 | 0.041437513 |
| ZNF740 | 0.237256417 | 0.000349309 | 0.008842903 |
| ZNF429 | 0.23712287 | 0.003488292 | 0.034475138 |
| ATF7IP2 | 0.236892415 | 6.07E-05 | 0.003053704 |
| C19orf25 | 0.236815208 | 0.002729159 | 0.029771943 |
| DHRS9 | 0.236474568 | 0.000118139 | 0.004603387 |
| SNX10 | 0.236435706 | 0.001476605 | 0.02085936 |
| TDRD3 | 0.235989269 | 0.001352019 | 0.019841509 |
| KIF22 | 0.23552963 | 0.005929006 | 0.046444157 |
| MAD2L1 | 0.23513095 | 0.000181638 | 0.005850031 |
| TRADD | 0.235107024 | 1.23E-05 | 0.001185339 |
| ARL6IP5 | 0.235017747 | 1.44E-05 | 0.001325425 |
| OAZ2 | 0.234951001 | 0.001525464 | 0.021244514 |
| ZNF627 | 0.234736214 | 1.13E-05 | 0.001125182 |
| SLC22A9 | 0.234244767 | 0.00041946 | 0.009844421 |
| KBTBD7 | 0.234180535 | 0.002239335 | 0.026775635 |
| PSPH | 0.233796008 | 0.001690655 | 0.022652734 |
| EFCAB7 | 0.233563513 | 0.001970294 | 0.024853876 |
| NUCB2 | 0.23326918 | 0.001064964 | 0.017185254 |
| TBL2 | 0.233266844 | 0.000723207 | 0.013538156 |
| PRPSAP2 | 0.233067866 | 0.000128002 | 0.004801088 |
| GOSR1 | 0.232950931 | 0.000148126 | 0.005131949 |
| RWDD3 | 0.232901659 | 1.47E-05 | 0.001334332 |
| MYL6B | 0.232855281 | 0.001647803 | 0.022289765 |
| TFEC | 0.23271595 | 0.000372439 | 0.009123875 |
| IFIH1 | 0.232115363 | 0.004006784 | 0.037407834 |
| RALGPS1 | 0.23173909 | 0.005827462 | 0.045899749 |
| KLRC4 | 0.231003703 | 0.000959436 | 0.016065653 |
| IPP | 0.230592257 | 0.001971566 | 0.024853876 |
| SLC25A20 | 0.230244499 | 0.000324209 | 0.008511614 |
| PIGF | 0.230183264 | 1.13E-05 | 0.001125182 |
| TMEM170A | 0.230095908 | 0.000477203 | 0.010514681 |
| CDK5 | 0.22969021 | 0.00097727 | 0.016241897 |
| TRIP11 | 0.22959499 | 0.001597106 | 0.021812631 |
| PARP14 | 0.229421359 | 0.0042159 | 0.038266739 |
| SLC39A9 | 0.229375335 | 5.70E-05 | 0.00294594 |
| HIBCH | 0.229070016 | 0.004552385 | 0.039851938 |
| KLRD1 | 0.229069214 | 0.004151441 | 0.037965798 |
| STX18 | 0.228522894 | 0.001122899 | 0.017728596 |
| SCRN3 | 0.228453913 | 1.00E-05 | 0.001051589 |
| GIMAP8 | 0.228325102 | 0.000712724 | 0.013406444 |
| EPSTI1 | 0.228259273 | 0.000560761 | 0.011493024 |
| RPS21 | 0.227904256 | 0.000281221 | 0.007955391 |
| ZNF385B | 0.227535032 | 0.002340669 | 0.027459618 |
| PMS2 | 0.227063787 | 5.95E-05 | 0.003024239 |
| C11orf65 | 0.226963156 | 0.003496973 | 0.034535235 |
| WIPI1 | 0.226329148 | 7.37E-05 | 0.003421666 |
| C17orf58 | 0.226112036 | 0.000196731 | 0.006170064 |
| ING2 | 0.226054743 | 8.24E-06 | 0.000942592 |
| PKIB | 0.225866694 | 0.000511456 | 0.010974086 |
| VPS41 | 0.225852685 | 6.14E-05 | 0.003060085 |
| BRF2 | 0.22571759 | 0.002250421 | 0.026825714 |
| CD151 | 0.22552064 | 0.000830354 | 0.01471589 |
| TLR3 | 0.225494957 | 0.003167353 | 0.032869474 |
| AOAH | 0.225120807 | 0.002595305 | 0.029003284 |
| MANBA | 0.225002716 | 0.000246707 | 0.007241098 |
| TRIM68 | 0.224124703 | 0.005408583 | 0.0441101 |
| C17orf80 | 0.224074973 | 9.25E-05 | 0.003953516 |
| PCNA | 0.224027055 | 1.98E-05 | 0.001593168 |
| SGCE | 0.223780195 | 1.93E-05 | 0.001574482 |
| SLC28A1 | 0.223727121 | 0.001593249 | 0.021812631 |
| IFIT1 | 0.223443937 | 0.004065331 | 0.037598266 |
| ADORA3 | 0.223315691 | 0.000308222 | 0.008291047 |
| ALG11 | 0.223008441 | 0.004215129 | 0.038266739 |
| RBM43 | 0.222023501 | 0.000132406 | 0.004892406 |
| IYD | 0.221939285 | 0.002118801 | 0.025993749 |
| COPS4 | 0.221592691 | 1.10E-05 | 0.00110618 |
| SDR42E1 | 0.221427147 | 2.74E-05 | 0.001891738 |
| SEC14L3 | 0.221309311 | 0.006323925 | 0.048058123 |
| IDI1 | 0.221279191 | 0.003620995 | 0.035359824 |
| KIF16B | 0.2212174 | 0.000701119 | 0.013298341 |
| RBBP9 | 0.221158584 | 6.10E-05 | 0.003053704 |
| ADK | 0.221074504 | 0.001045491 | 0.016958976 |
| CCDC150 | 0.220874049 | 0.003540115 | 0.034832399 |
| TMEM167A | 0.220794679 | 0.000175195 | 0.00574965 |
| MDFIC | 0.220754479 | 8.80E-07 | 0.000234542 |
| PALMD | 0.220624422 | 8.36E-05 | 0.00373556 |
| EML2 | 0.22060664 | 0.002151672 | 0.02625208 |
| CEP290 | 0.220191087 | 0.000593916 | 0.011952078 |
| TMEM106C | 0.219803804 | 0.001152827 | 0.01798734 |
| RET | 0.21973721 | 0.003317298 | 0.033640086 |
| COMT | 0.219594302 | 0.003761806 | 0.03640684 |
| SPAST | 0.219521729 | 1.51E-05 | 0.001352154 |
| PCSK9 | 0.219245788 | 0.000623757 | 0.012345001 |
| CHEK1 | 0.219099847 | 0.001038928 | 0.016887734 |
| TMEM9 | 0.219077064 | 0.002250283 | 0.026825714 |
| ENHO | 0.218769214 | 0.002790812 | 0.030190449 |
| OASL | 0.218724484 | 0.001985262 | 0.025006259 |
| ZKSCAN3 | 0.21854076 | 0.002224221 | 0.026692761 |
| SLC35B3 | 0.218475588 | 0.0054131 | 0.0441101 |
| IFT80 | 0.218422029 | 0.000548094 | 0.011367128 |
| SH2D1A | 0.218382144 | 0.000140593 | 0.005089563 |
| UBE2T | 0.218240573 | 0.004231048 | 0.038310937 |
| SCUBE1 | 0.21770082 | 0.00534738 | 0.043827101 |
| MAL2 | 0.217642723 | 0.003772681 | 0.03640684 |
| ZWINT | 0.217456521 | 2.45E-05 | 0.001764696 |
| CAP2 | 0.217386845 | 0.001695842 | 0.022702688 |
| INTS2 | 0.216701238 | 0.00030113 | 0.008208058 |
| TMEM99 | 0.216603346 | 0.002630689 | 0.029126691 |
| SUDS3 | 0.216435124 | 0.000146375 | 0.005109771 |
| CRELD2 | 0.216067467 | 0.006602943 | 0.049219502 |
| CALML4 | 0.216048653 | 0.000231548 | 0.006967051 |
| MAGEH1 | 0.215713766 | 0.00044614 | 0.010236212 |
| MSR1 | 0.215702375 | 0.002607431 | 0.029034497 |
| UCK1 | 0.215685355 | 0.002754855 | 0.029989171 |
| FAHD1 | 0.215603259 | 0.000185817 | 0.005927609 |
| MGST1 | 0.215406574 | 0.000526976 | 0.011139707 |
| ZRANB3 | 0.215387577 | 0.000460331 | 0.010408815 |
| PIR | 0.215163247 | 0.002225541 | 0.026692761 |
| LRP11 | 0.214875916 | 4.25E-05 | 0.00242566 |
| AURKA | 0.214821821 | 0.000251586 | 0.007328969 |
| CETN3 | 0.214790896 | 0.001005181 | 0.016546666 |
| LTBP1 | 0.214752362 | 0.000887402 | 0.015285812 |
| ZNF823 | 0.214611152 | 0.002815791 | 0.030319868 |
| PLCD1 | 0.21416461 | 0.00164007 | 0.022223802 |
| MANBAL | 0.21415735 | 0.000116659 | 0.004572643 |
| ZNHIT3 | 0.214063874 | 0.000147687 | 0.005128154 |
| CYSLTR1 | 0.213630784 | 0.004256134 | 0.038493269 |
| UNC119B | 0.21346327 | 0.002072294 | 0.02569177 |
| HMMR | 0.213404036 | 0.000136662 | 0.005002134 |
| KCNJ10 | 0.213274425 | 0.005842397 | 0.045970829 |
| OSGEPL1 | 0.213122504 | 0.001910378 | 0.024336968 |
| MBD5 | 0.212841587 | 0.000196036 | 0.006160693 |
| TMEM14A | 0.212784489 | 0.002873524 | 0.03076431 |
| MAF | 0.212704203 | 0.000533643 | 0.011180363 |
| RAPH1 | 0.212515166 | 0.002060227 | 0.025618617 |
| ATP8B1 | 0.212390497 | 0.001432975 | 0.020582978 |
| CTNNBL1 | 0.212136857 | 0.000986121 | 0.016319253 |
| CDADC1 | 0.212039223 | 0.001278156 | 0.019277901 |
| GAS2 | 0.21170087 | 0.000195286 | 0.006150735 |
| COG5 | 0.211643194 | 0.001177797 | 0.01825387 |
| PDE6D | 0.211473366 | 0.004711779 | 0.040632781 |
| TBC1D2 | 0.211364841 | 0.004323528 | 0.038849909 |
| LIN52 | 0.211348524 | 2.62E-05 | 0.001834565 |
| RAD51AP1 | 0.211014672 | 0.000413721 | 0.009807599 |
| BIVM | 0.210829253 | 0.002985514 | 0.031529302 |
| TAF12 | 0.210737755 | 0.002684549 | 0.029575673 |
| ZNF680 | 0.210715823 | 0.000460624 | 0.010408815 |
| LYPLAL1 | 0.210506566 | 0.002559865 | 0.028820168 |
| SS18L1 | 0.210492441 | 0.00520485 | 0.043179592 |
| ZNF33A | 0.210486668 | 0.001885472 | 0.02417359 |
| MED22 | 0.210412041 | 2.88E-05 | 0.001924946 |
| TRAPPC6B | 0.210032114 | 0.001538692 | 0.021333243 |
| ERAP1 | 0.209966382 | 0.006452383 | 0.048536398 |
| ACSS2 | 0.209957561 | 0.004229099 | 0.038310937 |
| NLRP11 | 0.209265862 | 0.001900834 | 0.024257076 |
| SLC22A25 | 0.208935875 | 0.00536297 | 0.043862438 |
| ANP32A | 0.208934514 | 0.001031446 | 0.016836981 |
| MAPK9 | 0.208788494 | 0.001666494 | 0.02246445 |
| HCFC2 | 0.208704159 | 0.000701847 | 0.013298341 |
| PPP1R7 | 0.208541136 | 0.000516873 | 0.011029458 |
| UGT2B15 | 0.208378299 | 0.000245248 | 0.007225523 |
| MPP5 | 0.207935725 | 0.003554873 | 0.034955501 |
| CCDC51 | 0.207920797 | 0.00307985 | 0.032251334 |
| FOXD2 | 0.207880409 | 0.001464658 | 0.020826531 |
| GOLPH3L | 0.207874948 | 3.30E-05 | 0.002063154 |
| AP1S1 | 0.207871682 | 0.001094917 | 0.0174335 |
| ITGA6 | 0.207762473 | 0.004388572 | 0.039100012 |
| TMEM26 | 0.207394501 | 0.000546541 | 0.011351127 |
| ZNF177 | 0.207118569 | 0.000877485 | 0.015234556 |
| RNASEL | 0.206814362 | 0.000428217 | 0.010009417 |
| IDH1 | 0.206725368 | 0.00086989 | 0.015119558 |
| SERAC1 | 0.206565727 | 2.44E-05 | 0.001764696 |
| ARMCX2 | 0.206491217 | 0.004344039 | 0.038859039 |
| PDIK1L | 0.206302402 | 0.000431467 | 0.010032727 |
| SAMD9 | 0.206092155 | 0.000336908 | 0.0086345 |
| ZC3H8 | 0.205893278 | 0.003885341 | 0.036982678 |
| BBS4 | 0.205830236 | 0.000181295 | 0.005850031 |
| CCDC121 | 0.20579493 | 0.003173118 | 0.032893695 |
| TMEM60 | 0.205652261 | 3.21E-05 | 0.002039478 |
| OAS3 | 0.205603789 | 0.006016845 | 0.046892804 |
| MAGED2 | 0.205584734 | 0.001387837 | 0.020214606 |
| STX17 | 0.20542083 | 0.001522947 | 0.021228463 |
| RNF128 | 0.205013488 | 0.005163319 | 0.043067344 |
| HTATSF1 | 0.204585186 | 0.005356516 | 0.043837727 |
| PMVK | 0.204289583 | 0.00151761 | 0.021173037 |
| CCL5 | 0.204235713 | 0.002964093 | 0.031431106 |
| WDR25 | 0.204096339 | 0.001421662 | 0.020534239 |
| PEPD | 0.204085843 | 0.000330885 | 0.008578744 |
| COMMD9 | 0.203589584 | 0.002746961 | 0.02992418 |
| CASP6 | 0.203521992 | 0.005240073 | 0.043335768 |
| SMC2 | 0.203388799 | 0.000623251 | 0.012345001 |
| HERC4 | 0.203168825 | 6.32E-05 | 0.003112037 |
| RELL2 | 0.202949123 | 0.001211603 | 0.018569154 |
| SNAPC3 | 0.202927618 | 0.00033062 | 0.008578744 |
| ZNF585B | 0.202651481 | 2.55E-05 | 0.001824474 |
| C4orf33 | 0.202439059 | 0.001314632 | 0.019566506 |
| USP40 | 0.202068148 | 0.00079423 | 0.014349649 |
| NEIL2 | 0.20183596 | 0.002419295 | 0.027960287 |
| TUBG1 | 0.201625672 | 0.000142554 | 0.005089563 |
| PNRC2 | 0.201585381 | 0.006167593 | 0.047457803 |
| IFI27L1 | 0.200619936 | 0.000360173 | 0.008945617 |
| SKA2 | 0.200436885 | 0.002278786 | 0.0270484 |
| ATP6V0D1 | 0.200401236 | 0.000396883 | 0.009601718 |
| RFC1 | 0.200031685 | 0.000498295 | 0.010795927 |
| IFT52 | 0.200024174 | 0.002395592 | 0.0279045 |
| TMEM140 | 0.200011787 | 0.004384025 | 0.039081886 |
| S100A14 | 0.199965005 | 0.000457451 | 0.010388485 |
| NUDT14 | 0.19995923 | 0.003237211 | 0.03323964 |
| AXIN2 | 0.19988067 | 0.005584951 | 0.044783249 |
| RACGAP1 | 0.19961042 | 4.23E-06 | 0.000608889 |
| PTCD2 | 0.199309027 | 0.001453042 | 0.020794404 |
| ZNF784 | 0.199298311 | 0.001744635 | 0.02309748 |
| MGAT2 | 0.199296786 | 0.001888392 | 0.02417359 |
| RNF214 | 0.1989565 | 0.000308596 | 0.008291047 |
| SPATS2 | 0.198881503 | 0.000133537 | 0.00492253 |
| ZNF671 | 0.198253562 | 0.004874261 | 0.041592983 |
| RCC1 | 0.198192441 | 0.0028388 | 0.03049749 |
| SLC46A3 | 0.198005464 | 0.000177828 | 0.005782834 |
| TUBE1 | 0.197920159 | 0.002528139 | 0.0286421 |
| EAF2 | 0.197919587 | 4.01E-06 | 0.000594577 |
| FAM111A | 0.197515302 | 7.01E-05 | 0.003316372 |
| CDC123 | 0.19749386 | 0.003501444 | 0.034539296 |
| JRKL | 0.197178974 | 0.000409313 | 0.009779859 |
| PLEKHH3 | 0.197083155 | 0.003265706 | 0.03335079 |
| LARP6 | 0.196958961 | 0.000967035 | 0.016140776 |
| SLC44A3 | 0.196904404 | 0.004911597 | 0.041734049 |
| CENPBD1 | 0.196753205 | 0.003890854 | 0.036995789 |
| UPF3B | 0.19674994 | 0.001260668 | 0.019134987 |
| PBK | 0.196686469 | 0.003373636 | 0.033937998 |
| C3orf18 | 0.196543035 | 0.003768285 | 0.03640684 |
| CCDC66 | 0.196516509 | 0.004045845 | 0.037554025 |
| NUDCD2 | 0.196232158 | 0.004221247 | 0.038266739 |
| TRIP6 | 0.196050997 | 0.004683387 | 0.04053039 |
| SKP2 | 0.195409841 | 0.000934442 | 0.015778106 |
| RNPC3 | 0.195189098 | 0.000411297 | 0.009798063 |
| RAB8A | 0.195093882 | 0.000234105 | 0.007016824 |
| ZNF302 | 0.194748999 | 0.000488967 | 0.010702716 |
| C2orf88 | 0.194634524 | 0.00091339 | 0.01548761 |
| TLR8 | 0.194506551 | 0.00131094 | 0.019533511 |
| KCTD18 | 0.19418812 | 0.00297366 | 0.031468205 |
| SCHIP1 | 0.194078024 | 0.000466888 | 0.010419382 |
| TIA1 | 0.19406639 | 0.000373906 | 0.009145412 |
| PSMB9 | 0.193800408 | 0.001289427 | 0.019305421 |
| AQP4 | 0.193770924 | 5.18E-05 | 0.002776524 |
| TTC8 | 0.193686622 | 0.003255942 | 0.03335079 |
| AP3M1 | 0.193450027 | 0.001737772 | 0.02304585 |
| PLA2G12B | 0.193446668 | 2.43E-06 | 0.000435187 |
| SLC17A5 | 0.193391145 | 0.001718239 | 0.022884361 |
| MRFAP1L1 | 0.193378435 | 1.74E-06 | 0.000349533 |
| DNAJC24 | 0.193293191 | 0.001949813 | 0.02467965 |
| DIP2C | 0.193021689 | 0.003966148 | 0.037407834 |
| BUB1 | 0.192497301 | 0.002863534 | 0.030720781 |
| PLD6 | 0.192129328 | 0.004896674 | 0.04169275 |
| CCL18 | 0.192103523 | 0.001043836 | 0.016949802 |
| TOM1L1 | 0.191933583 | 0.003356831 | 0.03386437 |
| STX8 | 0.191885005 | 0.00091496 | 0.01548761 |
| C15orf40 | 0.19188089 | 0.002313519 | 0.027305838 |
| GALT | 0.191724824 | 0.005945518 | 0.046499988 |
| AP3M2 | 0.191327077 | 0.00433182 | 0.038849909 |
| FEN1 | 0.191081115 | 0.000428534 | 0.010009417 |
| YWHAZ | 0.191072047 | 2.38E-05 | 0.00176432 |
| ABCC6 | 0.190853269 | 0.002930438 | 0.0311379 |
| CPPED1 | 0.19057759 | 0.004436004 | 0.039312091 |
| LARS2 | 0.19054337 | 0.003895545 | 0.036995789 |
| NUDT16L1 | 0.190466007 | 0.005767973 | 0.045706955 |
| BBS2 | 0.190320195 | 0.002617785 | 0.029108118 |
| TMEM135 | 0.190260204 | 0.000603302 | 0.012078466 |
| MIB1 | 0.189688851 | 0.000602524 | 0.012078442 |
| SETD7 | 0.189567043 | 0.004275131 | 0.038560087 |
| SPATS2L | 0.189421468 | 0.001482293 | 0.0209053 |
| ZNF30 | 0.189298184 | 0.001424552 | 0.02053784 |
| POLE2 | 0.189078296 | 0.002306797 | 0.027247176 |
| VPS11 | 0.189063298 | 0.001004837 | 0.016546666 |
| INVS | 0.189038017 | 0.000494683 | 0.010742769 |
| ZNF185 | 0.189025618 | 0.002069089 | 0.02568775 |
| NR1I2 | 0.188855714 | 0.000732935 | 0.013638195 |
| SLFN12 | 0.188820084 | 0.001357098 | 0.019897286 |
| GIN1 | 0.188765912 | 0.001083247 | 0.017336407 |
| NAPB | 0.188703323 | 0.006590626 | 0.049219292 |
| GOPC | 0.188384365 | 0.002209981 | 0.02661669 |
| MIA3 | 0.188235872 | 0.002549334 | 0.02875811 |
| TMEM156 | 0.187826672 | 0.002212354 | 0.02661669 |
| MDM1 | 0.187397796 | 0.000585629 | 0.011846614 |
| ZNF552 | 0.187396861 | 0.001301795 | 0.019434479 |
| EI24 | 0.187271002 | 0.006615364 | 0.049219502 |
| FANCI | 0.186899258 | 0.000529636 | 0.01114888 |
| MEIS1 | 0.186792288 | 0.003660212 | 0.035653264 |
| MRPS10 | 0.186746561 | 6.11E-05 | 0.003053704 |
| CCNF | 0.186561194 | 0.002603786 | 0.029034497 |
| LIAS | 0.186547865 | 0.000553392 | 0.011417194 |
| ARHGEF9 | 0.186383506 | 0.002672689 | 0.029465872 |
| C7orf25 | 0.186292716 | 0.000349605 | 0.008842903 |
| NAALADL2 | 0.186225627 | 0.00543497 | 0.044186617 |
| KBTBD6 | 0.186086707 | 0.003360755 | 0.033881987 |
| DHRS11 | 0.185997487 | 0.000219798 | 0.006678081 |
| ZNF83 | 0.185878713 | 0.003380323 | 0.033937998 |
| ARL2BP | 0.185597739 | 2.84E-06 | 0.000487902 |
| RPL39L | 0.18537573 | 0.003588747 | 0.035182045 |
| CBY1 | 0.185329068 | 0.000336921 | 0.0086345 |
| ALAD | 0.185200166 | 0.001676686 | 0.022540896 |
| GMNN | 0.185197207 | 0.001288627 | 0.019305421 |
| GTF2E1 | 0.185027445 | 1.75E-05 | 0.001454755 |
| SENP8 | 0.184968296 | 0.000768275 | 0.014060339 |
| MRPL35 | 0.184885606 | 0.000125549 | 0.004763527 |
| TBC1D19 | 0.184814536 | 0.003706902 | 0.03595048 |
| CCDC125 | 0.184607188 | 0.002053039 | 0.025577564 |
| FKBP9 | 0.184553367 | 0.000912762 | 0.01548761 |
| HEATR6 | 0.184532012 | 0.005123534 | 0.042873427 |
| LMBRD2 | 0.184519998 | 0.00162677 | 0.022101341 |
| ABCC5 | 0.184476423 | 0.000357939 | 0.008937553 |
| BMPR1A | 0.184285678 | 0.003347887 | 0.033829495 |
| HEATR5A | 0.184208416 | 0.000888417 | 0.015285812 |
| DDC | 0.184178811 | 0.000657043 | 0.012840403 |
| GIMAP7 | 0.184003186 | 0.004440174 | 0.039312091 |
| RASSF4 | 0.183840548 | 0.000262459 | 0.00756075 |
| MICB | 0.183708669 | 0.001276394 | 0.019277901 |
| FBXO48 | 0.183402705 | 0.000846887 | 0.014869279 |
| PCYOX1 | 0.183401641 | 0.002081047 | 0.025727953 |
| DHFR | 0.183241478 | 0.00569019 | 0.045253885 |
| CYB5D1 | 0.183228476 | 2.80E-05 | 0.001902488 |
| POLD1 | 0.183212782 | 0.003833755 | 0.036745466 |
| COPS6 | 0.18317117 | 0.005423339 | 0.044147283 |
| ANLN | 0.182771746 | 1.14E-05 | 0.001125182 |
| FAS | 0.182641626 | 0.001943559 | 0.024640596 |
| ZNF763 | 0.182601595 | 1.33E-05 | 0.001254534 |
| KBTBD3 | 0.182483863 | 0.005629719 | 0.045003035 |
| PDE4DIP | 0.18246162 | 0.000110519 | 0.00446553 |
| MCM6 | 0.182241833 | 0.001031476 | 0.016836981 |
| MEST | 0.182165715 | 0.002279891 | 0.0270484 |
| ZFP30 | 0.181967877 | 0.00014578 | 0.005109771 |
| ACP1 | 0.181716661 | 2.95E-05 | 0.001932952 |
| ATG4C | 0.181621997 | 0.001836783 | 0.023882031 |
| SUPT7L | 0.181598643 | 0.001464376 | 0.020826531 |
| MCTS1 | 0.181552932 | 3.01E-05 | 0.0019477 |
| ZNF566 | 0.181510066 | 0.001414539 | 0.020450343 |
| CD3E | 0.181425218 | 0.002399737 | 0.0279045 |
| NDUFA6 | 0.18141618 | 7.02E-05 | 0.003316372 |
| RHOBTB1 | 0.181415075 | 4.22E-05 | 0.002423589 |
| TMEM42 | 0.1813862 | 0.005317891 | 0.043725475 |
| ST3GAL5 | 0.181382103 | 0.001483945 | 0.020909642 |
| SAC3D1 | 0.180931872 | 0.006162189 | 0.047457803 |
| AKAP10 | 0.180761064 | 0.000722567 | 0.013538156 |
| TRIM32 | 0.180740409 | 0.000527052 | 0.011139707 |
| IP6K2 | 0.180728593 | 0.000159338 | 0.005341935 |
| MPZL3 | 0.180605936 | 0.005178368 | 0.043077373 |
| POLB | 0.180327673 | 2.03E-05 | 0.001609833 |
| ZNF780A | 0.180129462 | 0.001283871 | 0.019277901 |
| MYO5C | 0.180110935 | 0.001334235 | 0.019691995 |
| CDK6 | 0.17983002 | 0.000314043 | 0.008379511 |
| ZKSCAN4 | 0.17964552 | 0.000680543 | 0.013087169 |
| DOLPP1 | 0.179635634 | 0.000548773 | 0.011367128 |
| ZNF436 | 0.179503304 | 0.000367093 | 0.009007093 |
| CLUAP1 | 0.179278029 | 1.40E-06 | 0.000299179 |
| MR1 | 0.179198948 | 1.15E-05 | 0.001125182 |
| FKBP3 | 0.17918776 | 0.003780254 | 0.03643472 |
| PDCL | 0.178999554 | 9.52E-05 | 0.004047854 |
| SLC23A1 | 0.178966715 | 0.001765548 | 0.023255606 |
| PRDX1 | 0.178963563 | 5.74E-05 | 0.00294594 |
| DUT | 0.178843892 | 3.24E-05 | 0.002040711 |
| ZNF226 | 0.178168564 | 0.000339124 | 0.00866243 |
| CNOT8 | 0.178127237 | 0.000656619 | 0.012840403 |
| KATNAL1 | 0.178118863 | 7.32E-05 | 0.003418161 |
| F8 | 0.178118836 | 0.001619222 | 0.022056587 |
| TP63 | 0.178041783 | 0.000756466 | 0.01391414 |
| ZBTB33 | 0.177779305 | 0.000326562 | 0.008537805 |
| HS2ST1 | 0.177734736 | 0.000865656 | 0.015079674 |
| CCDC90B | 0.177601993 | 0.000115332 | 0.004572643 |
| PARP2 | 0.177383361 | 0.000392985 | 0.009522228 |
| C12orf65 | 0.177357035 | 0.005353181 | 0.043837727 |
| DERL2 | 0.177288311 | 0.002154441 | 0.026265273 |
| CENPK | 0.177284043 | 0.003833106 | 0.036745466 |
| ATAD2B | 0.177246581 | 0.005416117 | 0.044111575 |
| GKAP1 | 0.177198503 | 0.005752841 | 0.045635486 |
| MINPP1 | 0.176790511 | 0.002490338 | 0.028359959 |
| EVI5L | 0.176678564 | 0.002211205 | 0.02661669 |
| ZNF766 | 0.176559456 | 0.000134104 | 0.004931718 |
| MEMO1 | 0.176557377 | 0.006060786 | 0.047141417 |
| ABCA5 | 0.176487697 | 0.002178285 | 0.026472966 |
| PSMB7 | 0.176348288 | 0.00491424 | 0.041734049 |
| SH3BGRL | 0.176347898 | 0.00188963 | 0.02417359 |
| JAZF1 | 0.176267234 | 0.000880521 | 0.015270224 |
| GALM | 0.176123624 | 4.94E-05 | 0.002687809 |
| ZMAT2 | 0.176118635 | 0.000155449 | 0.00525689 |
| OGG1 | 0.176112585 | 0.005607121 | 0.044846014 |
| KLRB1 | 0.175968296 | 0.00583229 | 0.045914528 |
| LZIC | 0.175933397 | 0.000255743 | 0.007422266 |
| CDC23 | 0.175890649 | 0.000555999 | 0.011434958 |
| ANP32E | 0.175483048 | 0.002234986 | 0.026744192 |
| MRPS14 | 0.17532456 | 0.003572794 | 0.035065229 |
| TARBP1 | 0.175274325 | 0.005227047 | 0.043251036 |
| NAPEPLD | 0.175172402 | 0.001505718 | 0.021044877 |
| SMC4 | 0.175063047 | 0.004093426 | 0.037701203 |
| TMCO3 | 0.175015375 | 0.004062262 | 0.037592238 |
| VPS13C | 0.174911359 | 0.000125333 | 0.004763527 |
| NME7 | 0.174910573 | 0.00260572 | 0.029034497 |
| TDRD6 | 0.17484029 | 0.004667807 | 0.040494881 |
| PIP4K2B | 0.174562884 | 0.001384879 | 0.020190417 |
| EXD2 | 0.174540751 | 6.87E-06 | 0.000834889 |
| GCSH | 0.174401884 | 0.004126857 | 0.037896927 |
| LMAN2L | 0.174283414 | 0.000309314 | 0.008296018 |
| CD84 | 0.174212295 | 0.000807334 | 0.014477064 |
| SLC39A7 | 0.173922898 | 0.006280569 | 0.047831118 |
| VRK3 | 0.173361271 | 0.000127097 | 0.004798843 |
| CACNB2 | 0.172956802 | 0.002145092 | 0.026212927 |
| GARNL3 | 0.172902804 | 0.000892814 | 0.01532959 |
| ZNF350 | 0.172766259 | 0.001475233 | 0.02085936 |
| ZNF772 | 0.172473873 | 0.002191677 | 0.026545537 |
| NBR1 | 0.172156828 | 0.003460849 | 0.034356715 |
| HSF2 | 0.172042784 | 0.003669572 | 0.035677418 |
| ZNF606 | 0.171883397 | 0.000299301 | 0.00818265 |
| NMT1 | 0.171805068 | 0.006247193 | 0.047754956 |
| PSME2 | 0.171544626 | 0.000283694 | 0.007994819 |
| BCAT1 | 0.171542501 | 0.004331883 | 0.038849909 |
| ENSA | 0.17151172 | 0.000102249 | 0.004263187 |
| ZFP90 | 0.171325101 | 0.005262528 | 0.043429117 |
| SCPEP1 | 0.171305952 | 0.003297768 | 0.033549997 |
| DYNLT1 | 0.171241276 | 0.001143951 | 0.017884721 |
| CLOCK | 0.170837555 | 0.005030806 | 0.042392314 |
| NFYB | 0.170819438 | 0.006082813 | 0.047164249 |
| ACOT9 | 0.170794781 | 0.00111317 | 0.017598038 |
| GOLGA2 | 0.170784475 | 0.000145388 | 0.005109771 |
| ZNF568 | 0.170754712 | 0.000670427 | 0.012987754 |
| GTF2H5 | 0.170474748 | 1.69E-05 | 0.001432931 |
| ACADL | 0.169910376 | 0.001885623 | 0.02417359 |
| ACTR6 | 0.169725594 | 0.002446615 | 0.028046831 |
| C12orf45 | 0.169659105 | 0.005446021 | 0.044212428 |
| HDAC11 | 0.169626697 | 0.006752654 | 0.04966633 |
| ZMYM1 | 0.169569375 | 0.002726383 | 0.029762537 |
| CRYM | 0.169491981 | 0.000122528 | 0.004683154 |
| RRAGB | 0.169407962 | 0.001271681 | 0.019245609 |
| UBTF | 0.169378158 | 0.0027752 | 0.030084324 |
| STX7 | 0.169345118 | 0.000414219 | 0.009807599 |
| SLAMF7 | 0.169299716 | 0.00398821 | 0.037407834 |
| ZFAND2A | 0.16918656 | 0.000477103 | 0.010514681 |
| EXOC4 | 0.169182078 | 0.004905476 | 0.041734049 |
| PAAF1 | 0.169106857 | 0.000473539 | 0.010463599 |
| MFSD3 | 0.169040564 | 0.003311978 | 0.033608042 |
| TMEM186 | 0.169008292 | 0.004586632 | 0.04003908 |
| ZCCHC17 | 0.168937867 | 0.001320866 | 0.019606288 |
| CHMP5 | 0.168850182 | 0.000154663 | 0.00525689 |
| NUDT6 | 0.168831101 | 0.002768484 | 0.030053414 |
| FUT10 | 0.168801403 | 0.003617408 | 0.035346988 |
| MRO | 0.168673761 | 0.006224101 | 0.04769562 |
| TFG | 0.168366325 | 0.001501762 | 0.021027368 |
| NSDHL | 0.168329164 | 0.004046332 | 0.037554025 |
| NMNAT1 | 0.168305194 | 0.003386267 | 0.033941214 |
| PSMD14 | 0.168300483 | 0.000746133 | 0.013834144 |
| RAD51C | 0.167822449 | 0.000184628 | 0.005921812 |
| GLS | 0.167811693 | 0.005539472 | 0.044604116 |
| ZWILCH | 0.167592125 | 0.000227821 | 0.006870336 |
| MOSPD2 | 0.167549077 | 0.002623168 | 0.029119713 |
| ZNF512 | 0.16736076 | 8.72E-05 | 0.003862827 |
| ZNF821 | 0.167336125 | 0.005220836 | 0.043245651 |
| GDE1 | 0.167119008 | 0.002801359 | 0.03024146 |
| AURKB | 0.16678669 | 0.005748391 | 0.045623451 |
| SIT1 | 0.166625162 | 0.001929023 | 0.024496234 |
| NCAPD2 | 0.166534669 | 0.002722065 | 0.029757165 |
| ZNF214 | 0.166519989 | 0.003145299 | 0.03272794 |
| TTC33 | 0.166358546 | 0.000955482 | 0.016033962 |
| DDX60 | 0.166225188 | 0.003260528 | 0.03335079 |
| DSTYK | 0.166098624 | 0.002980849 | 0.031501423 |
| SPATA7 | 0.165975791 | 0.001265953 | 0.01919412 |
| TARP | 0.165900426 | 0.003151306 | 0.032765017 |
| POLH | 0.165290679 | 0.00043912 | 0.01011992 |
| VWA5A | 0.164963189 | 0.000290951 | 0.008042951 |
| PRKACB | 0.164758071 | 0.004694492 | 0.040548315 |
| ITGB1BP1 | 0.164725808 | 0.000287582 | 0.008042951 |
| ZNF468 | 0.164658971 | 0.000516581 | 0.011029458 |
| TTC31 | 0.164489173 | 0.004746999 | 0.040910977 |
| KEAP1 | 0.164405124 | 0.002688219 | 0.029595143 |
| DONSON | 0.164135433 | 0.000195324 | 0.006150735 |
| WDR92 | 0.164094556 | 0.000950772 | 0.015989421 |
| SPOP | 0.163987697 | 7.50E-05 | 0.003450966 |
| DHX58 | 0.163616219 | 0.000786931 | 0.014273962 |
| ASB8 | 0.163609765 | 0.001828733 | 0.023825598 |
| GIMAP4 | 0.163350699 | 0.000118665 | 0.004603387 |
| LY86 | 0.163333522 | 0.000844151 | 0.014854774 |
| SLC33A1 | 0.163321158 | 0.004202877 | 0.038233889 |
| BET1 | 0.163232022 | 0.00671417 | 0.049474459 |
| DENND2D | 0.163199514 | 0.000868566 | 0.015113439 |
| DDX60L | 0.163131911 | 0.0062466 | 0.047754956 |
| TRPS1 | 0.163036922 | 0.006603823 | 0.049219502 |
| SLAMF6 | 0.162936011 | 0.00208286 | 0.025727953 |
| HADH | 0.16266044 | 0.005075787 | 0.04256564 |
| USP47 | 0.162570534 | 0.000192674 | 0.006091941 |
| CRELD1 | 0.162515571 | 6.67E-05 | 0.003242634 |
| SNX2 | 0.162509604 | 0.000529277 | 0.01114888 |
| NDUFB2 | 0.161901364 | 0.00043729 | 0.010107704 |
| ZNF441 | 0.161757547 | 0.006246628 | 0.047754956 |
| VAMP5 | 0.161654764 | 6.89E-05 | 0.003316372 |
| MFNG | 0.161607091 | 0.002972174 | 0.031468205 |
| SASS6 | 0.161602023 | 0.001427887 | 0.020565782 |
| ZGPAT | 0.161563774 | 0.005044437 | 0.042421646 |
| PHPT1 | 0.161494164 | 0.000409904 | 0.009779859 |
| OPTN | 0.161454885 | 0.000534726 | 0.011180363 |
| MRPL1 | 0.161107181 | 0.002461433 | 0.028154455 |
| LANCL1 | 0.16083278 | 4.45E-05 | 0.002490947 |
| FBXO6 | 0.160362059 | 0.002332186 | 0.027401422 |
| TSPAN3 | 0.1603487 | 0.003017585 | 0.031824785 |
| CEP78 | 0.160257692 | 0.001087118 | 0.017344824 |
| RNF185 | 0.160193695 | 9.81E-05 | 0.004125979 |
| GMPR2 | 0.160064247 | 0.000294453 | 0.00812148 |
| MAT2B | 0.160044561 | 0.000656804 | 0.012840403 |
| ZFYVE1 | 0.160035864 | 0.000156592 | 0.005272593 |
| LACTB2 | 0.159917685 | 0.006609148 | 0.049219502 |
| ZNF224 | 0.159625657 | 0.001867596 | 0.024109814 |
| ZNF514 | 0.159503163 | 0.003093703 | 0.032320473 |
| PRKAG1 | 0.15928807 | 0.00616866 | 0.047457803 |
| OXR1 | 0.15922587 | 0.000305878 | 0.008260825 |
| ZNF132 | 0.159160049 | 0.004672381 | 0.040494881 |
| IMPACT | 0.159132198 | 0.001889199 | 0.02417359 |
| ZNF420 | 0.158805841 | 0.005560239 | 0.044700301 |
| SERGEF | 0.158756057 | 0.006774472 | 0.049779732 |
| ZMYND12 | 0.158741376 | 0.001012901 | 0.016620979 |
| TBC1D22A | 0.158671519 | 0.003939339 | 0.037275158 |
| ZNF84 | 0.158362772 | 0.001082063 | 0.017335293 |
| SCFD2 | 0.158128117 | 0.00116587 | 0.018136275 |
| GTF2I | 0.158102784 | 0.003226554 | 0.033217916 |
| HAO1 | 0.157905342 | 0.002446364 | 0.028046831 |
| LAMP3 | 0.157563182 | 0.006229123 | 0.047710606 |
| TBC1D23 | 0.157378657 | 0.000327729 | 0.008553939 |
| THOC3 | 0.157250009 | 0.00607701 | 0.04714911 |
| RPUSD3 | 0.157160125 | 0.004794989 | 0.041187658 |
| DNAJC8 | 0.157009331 | 0.000489865 | 0.010702716 |
| HEXA | 0.156604118 | 0.00172275 | 0.022924802 |
| L2HGDH | 0.156435012 | 0.003920281 | 0.037170938 |
| STAU2 | 0.156247926 | 0.000584925 | 0.011846614 |
| ARFIP1 | 0.155941466 | 0.001128174 | 0.017763034 |
| BHMT2 | 0.155803297 | 0.0023225 | 0.027328462 |
| GM2A | 0.155796278 | 0.001795012 | 0.023493814 |
| NEDD1 | 0.155375113 | 0.004082206 | 0.037653557 |
| RCCD1 | 0.155215352 | 0.002795337 | 0.030204538 |
| CCDC22 | 0.155047379 | 0.004310018 | 0.038777701 |
| GABRE | 0.154979439 | 0.002324219 | 0.027328462 |
| ZBTB26 | 0.154915112 | 0.002773848 | 0.030084324 |
| RAB4A | 0.154849836 | 0.002589388 | 0.028957958 |
| NSF | 0.154681471 | 0.00514898 | 0.042993844 |
| FLVCR1 | 0.154623875 | 0.005822268 | 0.045899749 |
| NIF3L1 | 0.154374524 | 6.60E-06 | 0.000820606 |
| RNF20 | 0.154333984 | 0.001477694 | 0.02085936 |
| AIFM2 | 0.154333018 | 0.003770835 | 0.03640684 |
| PFKM | 0.154315337 | 0.00236266 | 0.027655037 |
| IKZF3 | 0.154297987 | 0.005428689 | 0.044167719 |
| MIA2 | 0.153895003 | 0.006181803 | 0.047535406 |
| HMGN3 | 0.153693539 | 0.006647444 | 0.049288676 |
| ACSM2B | 0.153562768 | 0.00112978 | 0.017770326 |
| ZNF260 | 0.153525932 | 0.002915251 | 0.031018905 |
| GPRASP2 | 0.153520148 | 0.003266142 | 0.03335079 |
| RFC3 | 0.153338081 | 0.000810421 | 0.014507369 |
| ANKRD13A | 0.153006634 | 0.002884541 | 0.03083741 |
| APOBEC3C | 0.152926676 | 0.003265812 | 0.03335079 |
| KRR1 | 0.152747427 | 0.004333376 | 0.038849909 |
| OIP5 | 0.152639909 | 0.006681031 | 0.049362142 |
| AMZ2 | 0.152591695 | 0.000244679 | 0.007225523 |
| ANO10 | 0.152578775 | 0.005103791 | 0.042754213 |
| PTGR1 | 0.152482188 | 0.002524362 | 0.0286421 |
| CEP250 | 0.152425187 | 0.002010111 | 0.025217161 |
| CLCN2 | 0.152245126 | 0.00522681 | 0.043251036 |
| NIPAL2 | 0.151923778 | 0.005770665 | 0.045706955 |
| CCDC82 | 0.151598777 | 0.006437381 | 0.048493898 |
| NIPSNAP3A | 0.151568346 | 0.004652777 | 0.040457577 |
| PRDX3 | 0.151559743 | 0.002710701 | 0.029674637 |
| PSMD4 | 0.151476948 | 0.006567764 | 0.049120475 |
| APLF | 0.151354964 | 0.006814073 | 0.049929216 |
| NAE1 | 0.151283389 | 0.006801992 | 0.049911222 |
| APAF1 | 0.151258932 | 0.001283048 | 0.019277901 |
| TRAT1 | 0.151043928 | 0.004218002 | 0.038266739 |
| ZMYM2 | 0.151009896 | 0.00156064 | 0.021465356 |
| HDAC6 | 0.150792357 | 0.003690496 | 0.035835724 |
| RPRD1A | 0.150744219 | 0.001178123 | 0.01825387 |
| XPO1 | 0.150631967 | 0.000858854 | 0.015028492 |
| PAPSS1 | 0.150599976 | 0.000714447 | 0.013422637 |
| ADCY6 | 0.150596831 | 0.004180703 | 0.038121347 |
| ZNF234 | 0.150555811 | 0.004050949 | 0.037554025 |
| RNASEH2A | 0.150434979 | 0.004256097 | 0.038493269 |
| PKP4 | 0.150356185 | 0.004037881 | 0.037522864 |
| NICN1 | 0.15030987 | 0.000826803 | 0.014699148 |
| ELMOD3 | 0.150070878 | 0.003063466 | 0.032134375 |
| POLR2G | 0.150030272 | 0.000889281 | 0.015285812 |
| C9orf40 | 0.149645218 | 0.004626004 | 0.040276181 |
| CCDC28A | 0.149602127 | 0.000611684 | 0.012214841 |
| ANKRA2 | 0.149529723 | 0.00019958 | 0.006228114 |
| EIF4E2 | 0.149439084 | 0.003232844 | 0.033238684 |
| SLC9A6 | 0.149277315 | 0.000265232 | 0.00759843 |
| FRS2 | 0.149209645 | 0.002425426 | 0.027989563 |
| VAMP3 | 0.149194102 | 0.002724844 | 0.029762537 |
| THAP1 | 0.149151926 | 0.006161281 | 0.047457803 |
| FUNDC1 | 0.148961153 | 0.005884261 | 0.046183432 |
| ZNF57 | 0.148791485 | 0.001165704 | 0.018136275 |
| KIF3A | 0.148789568 | 0.004512847 | 0.039727446 |
| TMEM50B | 0.14878112 | 0.004518805 | 0.039727446 |
| CMBL | 0.148740524 | 0.005568922 | 0.044746976 |
| NUP43 | 0.148736516 | 0.002346651 | 0.027509042 |
| SEC24A | 0.148590484 | 0.003383764 | 0.033937998 |
| TMX1 | 0.148331269 | 0.003873632 | 0.036916075 |
| C5orf24 | 0.148299744 | 0.001277807 | 0.019277901 |
| LECT2 | 0.14820569 | 0.005196322 | 0.043179592 |
| GALK2 | 0.148148675 | 0.000945634 | 0.015920227 |
| FAM136A | 0.14799286 | 0.000288781 | 0.008042951 |
| SEMA6D | 0.147959689 | 0.002913427 | 0.031018905 |
| GCKR | 0.147813476 | 0.00386422 | 0.036880998 |
| LIPA | 0.147569726 | 0.004015672 | 0.037428277 |
| NBAS | 0.147179357 | 0.006630542 | 0.049233754 |
| PHTF1 | 0.147077846 | 0.000458488 | 0.010396858 |
| SUMF1 | 0.146903607 | 4.20E-05 | 0.002423589 |
| COMMD6 | 0.146865119 | 0.005508915 | 0.044499221 |
| CCDC126 | 0.146862918 | 0.006374781 | 0.048212991 |
| COG6 | 0.146830841 | 0.002433447 | 0.027996624 |
| PRIM1 | 0.146632147 | 0.004869096 | 0.04157171 |
| SNX7 | 0.146279271 | 0.004157886 | 0.03798169 |
| FAM118B | 0.146187209 | 0.00514786 | 0.042993844 |
| CALM3 | 0.146100383 | 0.000471992 | 0.010444244 |
| DUSP28 | 0.146083975 | 0.001106714 | 0.017531619 |
| GATM | 0.146060344 | 0.001566239 | 0.021523329 |
| ATP6V1H | 0.146057549 | 0.006640128 | 0.049269492 |
| RNF7 | 0.146035217 | 0.002698146 | 0.029614153 |
| VBP1 | 0.145800552 | 0.0054827 | 0.044351989 |
| PTK6 | 0.145787539 | 0.005393229 | 0.044040454 |
| SRP14 | 0.14571265 | 0.003992854 | 0.037407834 |
| FBXW2 | 0.145706627 | 0.000149585 | 0.005159528 |
| THYN1 | 0.145544385 | 0.00324951 | 0.033343916 |
| CREB3L4 | 0.1454642 | 0.003092818 | 0.032320473 |
| COX11 | 0.145445067 | 0.002565951 | 0.028820168 |
| IKBKB | 0.145057019 | 1.31E-05 | 0.001240877 |
| MTFR1 | 0.144982892 | 0.001055219 | 0.017096574 |
| RDH16 | 0.144893774 | 0.001324998 | 0.01963932 |
| TXNDC5 | 0.1448167 | 0.001199584 | 0.018472013 |
| ZNF761 | 0.144665139 | 0.002428096 | 0.027991862 |
| YIPF5 | 0.144502054 | 0.001373558 | 0.020044159 |
| HESX1 | 0.144416394 | 0.004085832 | 0.037653557 |
| ZNF329 | 0.14430325 | 0.001332143 | 0.019679781 |
| SLC40A1 | 0.144216484 | 0.001325616 | 0.01963932 |
| ATP6V1E2 | 0.143712559 | 0.00537459 | 0.043934378 |
| TMEM101 | 0.143710267 | 0.004561669 | 0.039910553 |
| DNASE1 | 0.143563385 | 0.00488105 | 0.04162808 |
| CEP152 | 0.143312816 | 0.003667188 | 0.035677418 |
| RNF121 | 0.142901707 | 0.000128955 | 0.004815769 |
| PSMD7 | 0.142876233 | 0.003465351 | 0.034379466 |
| HELLS | 0.1428537 | 0.004305966 | 0.03876366 |
| CCDC115 | 0.142697439 | 0.001504218 | 0.021042815 |
| SLC26A6 | 0.142662538 | 0.000322885 | 0.008505424 |
| MED7 | 0.142628397 | 0.003173916 | 0.032893695 |
| WDR48 | 0.142492428 | 0.001100948 | 0.01747586 |
| MSL3 | 0.142331937 | 0.002383681 | 0.027838245 |
| KIFAP3 | 0.142260958 | 0.001469248 | 0.020843037 |
| RNF186 | 0.142168633 | 0.003231939 | 0.033238684 |
| USF1 | 0.142157182 | 0.000533637 | 0.011180363 |
| BAG4 | 0.141902165 | 0.002134746 | 0.026148113 |
| RNF14 | 0.141663077 | 0.000935164 | 0.015778106 |
| ZNF14 | 0.141626965 | 0.005961656 | 0.046579366 |
| PJA1 | 0.141462293 | 0.000461511 | 0.010408815 |
| TTC5 | 0.141259065 | 0.000202929 | 0.006299485 |
| CTSZ | 0.14110719 | 0.001056172 | 0.017096574 |
| ZNF596 | 0.141039472 | 0.003058168 | 0.032122119 |
| GPC6 | 0.140920206 | 9.14E-05 | 0.003927403 |
| PPIC | 0.140883303 | 0.002672589 | 0.029465872 |
| CCR2 | 0.140782957 | 0.001086362 | 0.017344824 |
| MAFB | 0.140767901 | 0.001549473 | 0.021395929 |
| AGBL5 | 0.140595794 | 0.005255194 | 0.043429117 |
| ALG6 | 0.140557195 | 0.003683179 | 0.035787337 |
| STAM2 | 0.140478005 | 0.001752187 | 0.023158048 |
| PPIE | 0.140462458 | 0.003638505 | 0.035486263 |
| FMO3 | 0.140440952 | 0.002782201 | 0.030139215 |
| FAM162A | 0.140415336 | 0.004656598 | 0.040468174 |
| ZNF396 | 0.140347846 | 0.001316928 | 0.019566506 |
| TMEM167B | 0.140063054 | 1.70E-05 | 0.001434523 |
| PSMD1 | 0.139933416 | 0.001150162 | 0.017963768 |
| STK38 | 0.139650901 | 0.006460951 | 0.04855389 |
| DBT | 0.139591712 | 0.004803828 | 0.041218059 |
| FAR2 | 0.139587047 | 0.006102801 | 0.047254938 |
| COPS5 | 0.139515692 | 7.43E-05 | 0.003431535 |
| CSDE1 | 0.139456963 | 0.004626738 | 0.040276181 |
| MIPOL1 | 0.139414929 | 0.002090907 | 0.025735402 |
| ARL6IP6 | 0.139359733 | 0.002995824 | 0.031616711 |
| LRRC28 | 0.139221144 | 0.000903252 | 0.015426607 |
| PCBD2 | 0.139202376 | 0.004909113 | 0.041734049 |
| GRB14 | 0.139085595 | 0.004935615 | 0.041818315 |
| CLTA | 0.138990238 | 0.003373699 | 0.033937998 |
| MRPL45 | 0.138705671 | 0.001589112 | 0.021779942 |
| DCLRE1A | 0.138535081 | 0.005509482 | 0.044499221 |
| DNAJB14 | 0.138526129 | 0.001765205 | 0.023255606 |
| LCK | 0.138513853 | 0.000952121 | 0.015994808 |
| RBBP4 | 0.138467226 | 0.000615246 | 0.012254506 |
| TPRG1L | 0.138370914 | 0.000108622 | 0.004423369 |
| THOC5 | 0.138127826 | 0.000439881 | 0.010122463 |
| SNX5 | 0.138119674 | 2.81E-05 | 0.001902488 |
| SCP2 | 0.137950978 | 0.002613943 | 0.029086188 |
| TRAF3 | 0.137779752 | 0.006075289 | 0.04714911 |
| GOSR2 | 0.137712892 | 0.001280526 | 0.019277901 |
| PGAM1 | 0.137013378 | 0.000630623 | 0.012433414 |
| TRIM23 | 0.136959053 | 0.005299491 | 0.043618455 |
| FEZ2 | 0.13687812 | 0.000350169 | 0.008842903 |
| ZNF277 | 0.136738744 | 0.000502859 | 0.010849487 |
| CRYZL1 | 0.136689551 | 0.000353892 | 0.008893606 |
| EED | 0.136582297 | 0.00497356 | 0.042071073 |
| SERPINB6 | 0.13644704 | 0.002511064 | 0.028533317 |
| CNPY4 | 0.136247828 | 0.005531077 | 0.044604116 |
| CEPT1 | 0.136242047 | 0.001331238 | 0.019679781 |
| BDH1 | 0.135841717 | 0.005261212 | 0.043429117 |
| TP53BP1 | 0.135822816 | 0.006676271 | 0.049362142 |
| ZNF582 | 0.135708997 | 0.003324768 | 0.033693868 |
| TMEM14C | 0.135547505 | 0.000334795 | 0.00860837 |
| GOLGA7 | 0.135293294 | 0.004022228 | 0.037466935 |
| EDF1 | 0.135260662 | 0.003185489 | 0.032991654 |
| LACTB | 0.135129887 | 0.00667227 | 0.049362142 |
| PIGY | 0.135039325 | 0.001795715 | 0.023493814 |
| LAMP2 | 0.134828829 | 0.006161427 | 0.047457803 |
| HSBP1 | 0.13481978 | 0.006153273 | 0.047457803 |
| ZNF773 | 0.134549804 | 0.006568198 | 0.049120475 |
| ZNF720 | 0.134324592 | 0.00413313 | 0.037909772 |
| CCDC14 | 0.134276782 | 0.005470741 | 0.044307255 |
| ARL1 | 0.134263792 | 0.002209839 | 0.02661669 |
| FBXO3 | 0.134205874 | 0.003981695 | 0.037407834 |
| HMGN1 | 0.134130748 | 0.006209468 | 0.047677438 |
| UROD | 0.134054514 | 0.003339803 | 0.033802201 |
| RNF144B | 0.133876337 | 0.006354967 | 0.04814669 |
| PDZD11 | 0.133783242 | 0.001344539 | 0.019769042 |
| THUMPD1 | 0.133779056 | 0.001606885 | 0.021926939 |
| COPB2 | 0.133752026 | 0.003996614 | 0.037407834 |
| KLHL22 | 0.133659859 | 0.001649691 | 0.022295907 |
| COX7A2L | 0.133526099 | 0.000361662 | 0.008949321 |
| GLRX3 | 0.133217332 | 0.000132349 | 0.004892406 |
| PDE7A | 0.132914328 | 0.001104371 | 0.017512332 |
| EBAG9 | 0.132792627 | 0.003278728 | 0.033408793 |
| CISD1 | 0.132765035 | 0.000939611 | 0.015835949 |
| ADAMTSL5 | 0.132371871 | 0.001494827 | 0.021004337 |
| CSE1L | 0.132134426 | 0.002040035 | 0.025469331 |
| C21orf62 | 0.132124771 | 0.005339708 | 0.043821292 |
| CBX5 | 0.131779738 | 0.000249143 | 0.007271435 |
| MAP2K5 | 0.13169532 | 0.003484333 | 0.034457905 |
| EHBP1 | 0.131590997 | 0.001488462 | 0.020954312 |
| RNF157 | 0.131557478 | 0.002548121 | 0.02875811 |
| TRIP13 | 0.131410217 | 0.003821599 | 0.036719452 |
| KLHL7 | 0.131374716 | 0.00427026 | 0.038560087 |
| MRPL33 | 0.131352176 | 0.000530848 | 0.011159278 |
| CUL5 | 0.131254488 | 0.00101979 | 0.0166988 |
| TMEM126B | 0.131251386 | 0.001631721 | 0.02214926 |
| NUP37 | 0.131160504 | 0.001875376 | 0.024160219 |
| CYP2R1 | 0.131149679 | 0.006701726 | 0.04944021 |
| MRPS27 | 0.131131058 | 0.003792947 | 0.036511813 |
| BPNT1 | 0.130919397 | 0.001372553 | 0.020044159 |
| LY9 | 0.130842415 | 0.00020137 | 0.006265012 |
| HARS2 | 0.130768785 | 0.000322864 | 0.008505424 |
| LMBR1 | 0.130746097 | 0.000621782 | 0.012337292 |
| GSTCD | 0.130562496 | 0.001550091 | 0.021395929 |
| NDUFA9 | 0.130558246 | 0.000903422 | 0.015426607 |
| MAP3K7 | 0.130346301 | 0.003802049 | 0.036554186 |
| KIF21A | 0.12982763 | 0.001677961 | 0.022540896 |
| TCF19 | 0.129815838 | 0.006623151 | 0.049219502 |
| PDSS2 | 0.129777732 | 0.003209228 | 0.033149234 |
| POLI | 0.129707485 | 0.002888281 | 0.03083741 |
| ANKRD54 | 0.129584241 | 0.002542413 | 0.028721865 |
| KLHDC2 | 0.129430496 | 0.001753947 | 0.023161627 |
| DPYSL2 | 0.12938494 | 0.000253408 | 0.007368245 |
| YPEL5 | 0.129325862 | 3.35E-05 | 0.002074238 |
| PCCB | 0.129314736 | 0.005004607 | 0.042276825 |
| ARMCX3 | 0.128976093 | 0.000365796 | 0.009007093 |
| GNPDA1 | 0.128821035 | 0.000528219 | 0.01114888 |
| RARS2 | 0.128308237 | 0.001010806 | 0.016604113 |
| AKAP1 | 0.128224076 | 0.003130243 | 0.032614909 |
| RNF181 | 0.127874601 | 0.003483813 | 0.034457905 |
| NDRG3 | 0.127522141 | 0.002816419 | 0.030319868 |
| KLRC3 | 0.127423192 | 0.002563318 | 0.028820168 |
| ERCC8 | 0.127319735 | 0.004712107 | 0.040632781 |
| DERL3 | 0.127290577 | 0.001536066 | 0.021333243 |
| POLR3GL | 0.127128396 | 0.003301944 | 0.033549997 |
| ABCD2 | 0.127087796 | 0.006798014 | 0.049905571 |
| CLASP2 | 0.126935408 | 0.001211573 | 0.018569154 |
| AP3S1 | 0.12666153 | 0.000208404 | 0.00641968 |
| NHLRC3 | 0.126410491 | 0.000883782 | 0.015285812 |
| PSEN2 | 0.126296591 | 0.00535713 | 0.043837727 |
| MATK | 0.126028776 | 0.002463594 | 0.028158469 |
| LAMA3 | 0.125855635 | 0.006334627 | 0.048115947 |
| SMAP1 | 0.125646356 | 0.002287157 | 0.027056285 |
| PDCL3 | 0.125590928 | 0.004116268 | 0.037889153 |
| COMMD3 | 0.125251175 | 0.002053894 | 0.025577564 |
| GEMIN6 | 0.125220896 | 0.000143741 | 0.005095796 |
| MCCC1 | 0.125188844 | 0.0006874 | 0.013147763 |
| WDHD1 | 0.124939151 | 0.003376941 | 0.033937998 |
| PEX11B | 0.124806559 | 0.002015677 | 0.025266618 |
| FXR1 | 0.124529523 | 0.00047194 | 0.010444244 |
| EIF2AK2 | 0.124433244 | 0.006749132 | 0.049663907 |
| SMG1 | 0.124399719 | 0.006085025 | 0.047164249 |
| ELL3 | 0.124334978 | 0.00434007 | 0.038859039 |
| BANP | 0.124259399 | 0.006359249 | 0.04814669 |
| CEP70 | 0.124146655 | 0.003977572 | 0.037407834 |
| CYP4F2 | 0.124077758 | 0.006307055 | 0.047953347 |
| NCKAP1L | 0.12401459 | 0.004852886 | 0.041467562 |
| ATP6V1D | 0.123737293 | 0.005295568 | 0.043618455 |
| RCOR3 | 0.12364191 | 0.003769311 | 0.03640684 |
| USP48 | 0.123410283 | 0.006281755 | 0.047831118 |
| MRPL40 | 0.123182943 | 0.00262474 | 0.029119713 |
| XRCC3 | 0.123178474 | 0.003445966 | 0.034274582 |
| IFI27L2 | 0.12306797 | 0.00574212 | 0.045596945 |
| FCRL1 | 0.123031712 | 0.000840762 | 0.014811891 |
| RPL13A | 0.122933041 | 0.000700525 | 0.013298341 |
| RTN4IP1 | 0.122681509 | 0.002971764 | 0.031468205 |
| RFX5 | 0.122543273 | 0.000506176 | 0.010905911 |
| PCNP | 0.122475771 | 0.004159369 | 0.03798169 |
| FUCA1 | 0.122449952 | 0.005448394 | 0.044212428 |
| SLU7 | 0.122111044 | 0.004149531 | 0.037965798 |
| MTIF3 | 0.122016973 | 0.005871363 | 0.046128752 |
| PACSIN2 | 0.121657335 | 0.004160504 | 0.03798169 |
| MARVELD2 | 0.121430491 | 0.002284752 | 0.0270484 |
| CYB5RL | 0.121322903 | 0.004220642 | 0.038266739 |
| NR2C1 | 0.120934555 | 0.001364381 | 0.019966427 |
| VDAC3 | 0.120873325 | 0.00077412 | 0.014134044 |
| SPATA5 | 0.120761338 | 0.005646406 | 0.045008222 |
| EIF3H | 0.120151108 | 0.002028118 | 0.025381663 |
| EDC3 | 0.12009172 | 0.005704196 | 0.045342089 |
| FBXO22 | 0.119629442 | 0.002813552 | 0.030319868 |
| ITGAE | 0.11962609 | 0.003378037 | 0.033937998 |
| ZNF383 | 0.119581726 | 0.005906453 | 0.046334232 |
| RBL1 | 0.119512047 | 0.00414426 | 0.037960825 |
| NUF2 | 0.119439031 | 0.003053277 | 0.032092416 |
| CKS1B | 0.118661373 | 0.004408097 | 0.039184206 |
| RBX1 | 0.118583509 | 0.000973596 | 0.016198135 |
| RPP30 | 0.118431158 | 0.005825971 | 0.045899749 |
| DPM3 | 0.118363351 | 0.001472519 | 0.020843037 |
| RASA1 | 0.118262286 | 0.001572836 | 0.021583861 |
| RFC5 | 0.118098988 | 0.004854232 | 0.041467562 |
| NSMCE4A | 0.117767537 | 0.000382751 | 0.009332409 |
| HJURP | 0.117193577 | 0.002914346 | 0.031018905 |
| CD40LG | 0.117163562 | 0.003334124 | 0.03376669 |
| CBFA2T2 | 0.117101798 | 0.004348834 | 0.038879577 |
| BBX | 0.117039393 | 0.004452539 | 0.039399149 |
| CRLS1 | 0.116913942 | 0.003827051 | 0.036745466 |
| UFC1 | 0.116740963 | 0.004217946 | 0.038266739 |
| SCOC | 0.116673865 | 0.00585301 | 0.046031054 |
| NEK7 | 0.116157584 | 0.005735733 | 0.045569487 |
| MAN1A2 | 0.116095509 | 0.004005119 | 0.037407834 |
| FNIP1 | 0.116054572 | 0.004276077 | 0.038560087 |
| EXTL2 | 0.115823579 | 0.005102037 | 0.042754213 |
| GSTO1 | 0.115769501 | 0.001181461 | 0.018287369 |
| MTX3 | 0.115724087 | 0.004536053 | 0.039776125 |
| SH3KBP1 | 0.115500443 | 0.006442711 | 0.04851056 |
| UQCRQ | 0.115383344 | 0.001498731 | 0.021004337 |
| CTPS2 | 0.115350689 | 0.006457194 | 0.048549108 |
| IMMP2L | 0.115097909 | 0.000663114 | 0.012910386 |
| PTPRO | 0.114753503 | 0.005440578 | 0.044195111 |
| ESR1 | 0.114482897 | 0.004843425 | 0.041466325 |
| MLH1 | 0.114315837 | 0.002761615 | 0.030020742 |
| NEK1 | 0.114145816 | 0.00067315 | 0.013017832 |
| CEP63 | 0.114070276 | 0.002055281 | 0.025577564 |
| IL15 | 0.114053293 | 0.003267331 | 0.03335079 |
| MTHFS | 0.113617583 | 0.005390346 | 0.044040037 |
| PRRC1 | 0.113381779 | 0.003199616 | 0.033071914 |
| UBE2F | 0.11324715 | 0.000983895 | 0.016299748 |
| SMN1 | 0.113197262 | 0.003300984 | 0.033549997 |
| ROCK1 | 0.112156144 | 0.00580063 | 0.045813386 |
| FBXL5 | 0.11199279 | 0.004567296 | 0.039910553 |
| PRPSAP1 | 0.111860882 | 0.001315963 | 0.019566506 |
| DYNC2LI1 | 0.111240004 | 0.000260016 | 0.007504271 |
| CISD2 | 0.111211349 | 0.006515023 | 0.048911674 |
| GNPAT | 0.111110728 | 0.002382251 | 0.027838245 |
| CYB5R4 | 0.111050808 | 0.005578309 | 0.044754144 |
| SEC22A | 0.110980859 | 0.001194818 | 0.018420795 |
| ZBED5 | 0.110591635 | 0.005877518 | 0.046153798 |
| SLC35F5 | 0.110491587 | 0.000304936 | 0.008260825 |
| ATP6V1B2 | 0.110464769 | 0.002582519 | 0.028922728 |
| PANK2 | 0.110033001 | 0.001624336 | 0.022087566 |
| AASDH | 0.109986276 | 0.004283374 | 0.038582606 |
| TM2D2 | 0.109952394 | 0.005490551 | 0.044392418 |
| FAH | 0.109901958 | 0.004006737 | 0.037407834 |
| CDKN1B | 0.109888485 | 0.00154245 | 0.021366303 |
| TSPAN31 | 0.109822329 | 0.005688769 | 0.045253885 |
| CAMK2N1 | 0.109778175 | 0.005642358 | 0.045008222 |
| NIN | 0.109468389 | 0.002628187 | 0.029119713 |
| MRPL18 | 0.109444276 | 0.003770879 | 0.03640684 |
| TMEM9B | 0.108894054 | 0.00383881 | 0.036760272 |
| CHN1 | 0.108709841 | 0.000855031 | 0.014978453 |
| CLYBL | 0.108611207 | 0.006220785 | 0.04769371 |
| EXOC6 | 0.108551359 | 0.003569955 | 0.035059479 |
| TTC23 | 0.108535619 | 0.002695388 | 0.0296112 |
| UNC45A | 0.108489397 | 0.00661038 | 0.049219502 |
| DRAP1 | 0.108477062 | 0.002414689 | 0.027936875 |
| RPL34 | 0.108325188 | 0.004462159 | 0.039441889 |
| ANAPC11 | 0.108226374 | 0.001780227 | 0.023350095 |
| ARHGEF18 | 0.1076354 | 0.006771752 | 0.049779732 |
| C6orf89 | 0.107604938 | 0.004122246 | 0.037896927 |
| GPBP1 | 0.1075774 | 0.005334142 | 0.043810934 |
| ARHGAP25 | 0.107388404 | 0.004681065 | 0.04053039 |
| SRGAP2 | 0.107356552 | 0.006136542 | 0.047457803 |
| GLA | 0.107351996 | 0.00281276 | 0.030319868 |
| LETMD1 | 0.107066932 | 0.003458372 | 0.034354043 |
| RPL17 | 0.106850362 | 0.004008019 | 0.037407834 |
| MRPL13 | 0.106802854 | 0.002025672 | 0.025371464 |
| ERP29 | 0.106781443 | 0.002458394 | 0.02814038 |
| NPEPPS | 0.106676757 | 0.003378608 | 0.033937998 |
| CRLF3 | 0.106403253 | 0.003394958 | 0.034006421 |
| RPL41 | 0.106076691 | 0.004792155 | 0.041186056 |
| KDM5B | 0.10603394 | 0.001889167 | 0.02417359 |
| DFFA | 0.105754051 | 0.002620483 | 0.029117311 |
| NT5DC1 | 0.105166672 | 0.006263407 | 0.047762379 |
| MED31 | 0.104778668 | 0.003950417 | 0.037357261 |
| DCLRE1C | 0.104272861 | 0.001878352 | 0.024160219 |
| TMED2 | 0.103990607 | 0.004356727 | 0.038927765 |
| ASH2L | 0.103934958 | 0.003027251 | 0.031883487 |
| MPP1 | 0.103511335 | 0.00557658 | 0.044754144 |
| M6PR | 0.103190659 | 0.004622109 | 0.040276181 |
| PPCS | 0.102932372 | 0.001077026 | 0.017280922 |
| ERI3 | 0.102335736 | 0.003933624 | 0.037243734 |
| PPT1 | 0.102197968 | 0.003716801 | 0.03602402 |
| ATP6V1A | 0.102118302 | 0.004053305 | 0.037554025 |
| HDAC9 | 0.101822692 | 0.005173943 | 0.043077373 |
| ZNF544 | 0.101653974 | 0.003538375 | 0.034832399 |
| PSMB10 | 0.101099528 | 0.005549087 | 0.04463371 |
| PDXDC1 | 0.100048024 | 0.001498244 | 0.021004337 |
| SAE1 | 0.099989223 | 0.000400269 | 0.009623789 |
| CTNS | 0.099756663 | 0.00358922 | 0.035182045 |
| ZNF714 | 0.099111165 | 0.001853323 | 0.023996926 |
| ARL6 | 0.099097455 | 0.006452 | 0.048536398 |
| CNTN6 | 0.098970891 | 0.006265856 | 0.047762379 |
| VHL | 0.098467768 | 0.005055211 | 0.042484526 |
| ZHX1 | 0.098427802 | 0.004692655 | 0.040548315 |
| UFSP2 | 0.098171305 | 0.006616496 | 0.049219502 |
| ZSWIM3 | 0.097552258 | 0.006219446 | 0.04769371 |
| PARK7 | 0.096802482 | 0.006009994 | 0.046862893 |
| MIOS | 0.096760206 | 0.00546887 | 0.044307255 |
| TMED1 | 0.096491007 | 0.002637141 | 0.029156622 |
| HLA-A | 0.096415334 | 0.005285099 | 0.043592256 |
| BPGM | 0.096123699 | 0.005796229 | 0.045813386 |
| DPYS | 0.093906938 | 0.005929422 | 0.046444157 |
| SERF2 | 0.093499337 | 0.004329009 | 0.038849909 |
| CLNS1A | 0.093110432 | 0.006682738 | 0.049362142 |
| RPS6KC1 | 0.0911823 | 0.006187321 | 0.047554334 |
| PSMG2 | 0.090318203 | 0.001286547 | 0.019299439 |
| DNAJC9 | 0.089813562 | 0.000688459 | 0.013147763 |
| COQ5 | 0.089451182 | 0.006613242 | 0.049219502 |
| PCMT1 | 0.088495348 | 0.006202802 | 0.047649768 |
| EFR3A | 0.088210209 | 0.006387497 | 0.048239295 |
| GTF3A | 0.081387595 | 0.006678775 | 0.049362142 |
| CES1 | 0.081340819 | 0.001406562 | 0.020391866 |
| **Downregulated** | | | |
| ATP4B | -0.069928272 | 0.006036542 | 0.047022756 |
| STRA8 | -0.074646312 | 0.005139575 | 0.042961432 |
| MAGI1 | -0.080765691 | 0.005436692 | 0.044186617 |
| SASH1 | -0.08185717 | 0.003758367 | 0.036404212 |
| PROP1 | -0.082217471 | 0.005298218 | 0.043618455 |
| LIG3 | -0.082274908 | 0.006568231 | 0.049120475 |
| ZIC4 | -0.082736537 | 0.001861349 | 0.02404913 |
| FOXE3 | -0.087591081 | 0.00461867 | 0.040273561 |
| TAC3 | -0.089509153 | 0.002397213 | 0.0279045 |
| EDARADD | -0.091068032 | 0.004370481 | 0.039005855 |
| ANKRD13C | -0.092012352 | 0.00624055 | 0.047754956 |
| C17orf102 | -0.093395429 | 0.0032582 | 0.03335079 |
| ACTB | -0.093965146 | 0.002841768 | 0.030508312 |
| BVES | -0.094991993 | 0.003063189 | 0.032134375 |
| CCDC141 | -0.095499203 | 0.004614313 | 0.040258132 |
| MOG | -0.095569497 | 0.003981531 | 0.037407834 |
| WAS | -0.096239524 | 0.006375297 | 0.048212991 |
| HHLA2 | -0.096506066 | 0.002784691 | 0.0301452 |
| CDH26 | -0.096819651 | 0.003476658 | 0.034435781 |
| ESR2 | -0.097695754 | 0.003788919 | 0.036495622 |
| HOXD10 | -0.098526582 | 0.002169086 | 0.026423101 |
| CACNA1I | -0.098886289 | 0.002142853 | 0.026212927 |
| TAF1C | -0.100754359 | 0.004538732 | 0.039777196 |
| MT2A | -0.100995556 | 0.003145045 | 0.03272794 |
| PDCL2 | -0.101019107 | 0.003866862 | 0.036880998 |
| SLCO1C1 | -0.101075803 | 0.000573793 | 0.011667881 |
| VAX1 | -0.101842893 | 0.005212709 | 0.043201335 |
| COL25A1 | -0.102680588 | 0.006686798 | 0.049368692 |
| DEFB103A | -0.103581733 | 0.005455761 | 0.044249124 |
| ANKRD34B | -0.104142661 | 0.003082653 | 0.032251334 |
| NPAS3 | -0.104264606 | 0.003646057 | 0.035537637 |
| WSCD2 | -0.104402101 | 0.003829348 | 0.036745466 |
| DNAH8 | -0.104991089 | 0.000103691 | 0.004278566 |
| CCKAR | -0.105033235 | 0.002390231 | 0.027893801 |
| MAML1 | -0.105065693 | 0.005022441 | 0.042376844 |
| ZKSCAN2 | -0.105529457 | 0.003436789 | 0.034262051 |
| POLR3C | -0.105671923 | 0.000800853 | 0.01443176 |
| YOD1 | -0.106451254 | 0.006002756 | 0.046853423 |
| QRFPR | -0.106972266 | 0.004914938 | 0.041734049 |
| DNAJA2 | -0.107328102 | 0.004565903 | 0.039910553 |
| HHLA1 | -0.108074146 | 0.003875286 | 0.036916075 |
| IQCJ | -0.108707712 | 0.001076629 | 0.017280922 |
| HOXC9 | -0.108751109 | 0.000812224 | 0.014522939 |
| SPO11 | -0.109418338 | 0.001340029 | 0.019733504 |
| ZAN | -0.109590288 | 0.006428398 | 0.048449688 |
| RPS6KA5 | -0.11007837 | 0.006266586 | 0.047762379 |
| EFHD2 | -0.110493132 | 0.006722303 | 0.049489894 |
| FLNB | -0.110540136 | 0.005060502 | 0.042506027 |
| PGC | -0.110630686 | 0.005968224 | 0.046607278 |
| ASTN1 | -0.111021563 | 0.000710676 | 0.013394668 |
| DUSP23 | -0.111022585 | 0.00475806 | 0.040983599 |
| GCHFR | -0.111293158 | 0.006598286 | 0.049219502 |
| SPEF1 | -0.112202166 | 0.002564819 | 0.028820168 |
| ZMIZ1 | -0.113145842 | 0.002605652 | 0.029034497 |
| BANF2 | -0.113221175 | 0.000321851 | 0.008505424 |
| CACNA1G | -0.113576205 | 0.006419276 | 0.048404389 |
| AKAP8 | -0.113660339 | 0.00044381 | 0.010197788 |
| NPTN | -0.113781967 | 0.000511376 | 0.010974086 |
| CNGA3 | -0.114066659 | 0.000319744 | 0.008502448 |
| DKK1 | -0.114740696 | 0.006088342 | 0.047166457 |
| CLCA1 | -0.114813929 | 0.003444573 | 0.034274582 |
| GLI3 | -0.114829229 | 0.002224688 | 0.026692761 |
| ATG4D | -0.114887169 | 0.001621749 | 0.022071678 |
| SYMPK | -0.114933063 | 0.006159244 | 0.047457803 |
| RBM12 | -0.115151654 | 0.002873337 | 0.03076431 |
| NKAIN1 | -0.11559367 | 0.005601462 | 0.044846014 |
| WDR1 | -0.115871539 | 0.006812185 | 0.049929216 |
| FGF10 | -0.116395002 | 0.005295644 | 0.043618455 |
| S100A7L2 | -0.116425793 | 0.001536479 | 0.021333243 |
| TP53I11 | -0.116673238 | 0.005260421 | 0.043429117 |
| ECEL1 | -0.116678016 | 0.004521791 | 0.039727446 |
| RBM15 | -0.116790795 | 0.002043064 | 0.025486688 |
| RNF113B | -0.11693462 | 0.000694979 | 0.01323267 |
| MYT1 | -0.116939295 | 0.004890544 | 0.041663364 |
| PNPLA1 | -0.117113947 | 0.005481133 | 0.044351989 |
| NXNL1 | -0.117122029 | 0.001833167 | 0.023863385 |
| SERPINA1 | -0.117628737 | 0.006290737 | 0.047876079 |
| SLC6A4 | -0.117901804 | 0.00614578 | 0.047457803 |
| MUC16 | -0.118681337 | 0.006538429 | 0.049017739 |
| LHX9 | -0.119139292 | 0.005318115 | 0.043725475 |
| NFATC4 | -0.119795705 | 0.004077031 | 0.037653557 |
| CTLA4 | -0.120384835 | 0.00133123 | 0.019679781 |
| KALRN | -0.120399448 | 0.000449747 | 0.010255891 |
| WDR88 | -0.120427328 | 0.000618621 | 0.012290261 |
| NPY | -0.120597118 | 0.002411073 | 0.027936875 |
| ADAMTS15 | -0.120795149 | 0.002295976 | 0.027139971 |
| ADNP2 | -0.122052614 | 0.000516318 | 0.011029458 |
| SPRY1 | -0.122061428 | 0.003153075 | 0.032765017 |
| CABP1 | -0.122442059 | 0.00086092 | 0.015041175 |
| PDE9A | -0.122543858 | 0.000806225 | 0.014477064 |
| TSPAN2 | -0.122717676 | 0.006352455 | 0.04814669 |
| OR52A5 | -0.122815044 | 0.003032782 | 0.031920137 |
| PHRF1 | -0.123161227 | 0.005756942 | 0.045644749 |
| GABPB2 | -0.123325903 | 0.005578445 | 0.044754144 |
| ANKRD16 | -0.123782146 | 0.002424188 | 0.027989563 |
| RAC1 | -0.124074715 | 0.002003481 | 0.025154275 |
| SCRT1 | -0.124437061 | 0.000244806 | 0.007225523 |
| HPCAL4 | -0.124600432 | 0.004397385 | 0.03915611 |
| IZUMO1 | -0.124988547 | 0.001669033 | 0.022479203 |
| PPP2R5B | -0.124989175 | 0.005026066 | 0.042376956 |
| PHACTR4 | -0.125024792 | 0.001798838 | 0.023514893 |
| MYO3A | -0.125987213 | 0.001497668 | 0.021004337 |
| PDZD7 | -0.12605414 | 0.006552345 | 0.049098402 |
| KHSRP | -0.126207028 | 0.001445164 | 0.020719787 |
| EFHB | -0.126253737 | 0.004785339 | 0.041150215 |
| VCL | -0.126316146 | 0.002321193 | 0.027328462 |
| POR | -0.126496323 | 0.004427414 | 0.039312091 |
| HIF3A | -0.126507193 | 0.000853689 | 0.0149718 |
| TMEM108 | -0.1267935 | 0.000772406 | 0.014119334 |
| MAT1A | -0.126809711 | 0.000422816 | 0.009905612 |
| FBRS | -0.126868854 | 0.000905266 | 0.01544113 |
| TUBA8 | -0.126995254 | 0.004436622 | 0.039312091 |
| DENND5A | -0.127259138 | 0.00105932 | 0.017129714 |
| SYNGR3 | -0.127358259 | 0.001573418 | 0.021583861 |
| STMN4 | -0.12778281 | 0.006674087 | 0.049362142 |
| CEACAM19 | -0.127835039 | 0.00305133 | 0.032092416 |
| DGKE | -0.127904925 | 0.004028954 | 0.037507129 |
| GATAD2B | -0.128452987 | 0.006262899 | 0.047762379 |
| OR6X1 | -0.128478293 | 0.001292428 | 0.019331739 |
| TBXA2R | -0.12871511 | 0.00664169 | 0.049269492 |
| CTXN3 | -0.128828112 | 0.002564586 | 0.028820168 |
| NLRP12 | -0.129483455 | 0.005023329 | 0.042376844 |
| NPFFR2 | -0.129718315 | 0.001283696 | 0.019277901 |
| ATP4A | -0.130135581 | 0.006789993 | 0.049870225 |
| CYP19A1 | -0.130250504 | 0.000801558 | 0.01443176 |
| TMEM95 | -0.130551537 | 0.005942482 | 0.046499626 |
| SMOX | -0.130633417 | 0.004672686 | 0.040494881 |
| MT1X | -0.130946266 | 0.002371692 | 0.027739883 |
| FFAR3 | -0.131020429 | 0.001424268 | 0.02053784 |
| TICAM1 | -0.131054875 | 0.005040672 | 0.042421646 |
| SLC34A3 | -0.13106403 | 0.001033085 | 0.01684557 |
| ATOH1 | -0.131107926 | 0.006069957 | 0.047141417 |
| NCOR1 | -0.131228194 | 0.002083905 | 0.025727953 |
| ANXA11 | -0.13125066 | 0.004569343 | 0.039910553 |
| FBXW12 | -0.131316313 | 0.003416833 | 0.03417248 |
| CTSE | -0.131761232 | 0.004133109 | 0.037909772 |
| IFNA8 | -0.132042012 | 0.006064221 | 0.047141417 |
| KCNT1 | -0.132423852 | 0.004118807 | 0.037890103 |
| CASZ1 | -0.132506092 | 0.005113905 | 0.042815881 |
| KCNN3 | -0.132600667 | 0.002442653 | 0.028042739 |
| ELL2 | -0.132653887 | 0.002564729 | 0.028820168 |
| NFE2L2 | -0.132864834 | 0.004463246 | 0.039441889 |
| OBSCN | -0.133270613 | 0.00520731 | 0.043179592 |
| AKNA | -0.133872265 | 0.003969768 | 0.037407834 |
| FEM1A | -0.13402769 | 0.000364109 | 0.008990605 |
| MAN2C1 | -0.134634992 | 0.00386624 | 0.036880998 |
| TP53INP2 | -0.134754862 | 0.00116977 | 0.018163973 |
| SORCS1 | -0.134776765 | 0.004998402 | 0.042258226 |
| ZPBP2 | -0.1349144 | 0.006006154 | 0.046856436 |
| C2CD4C | -0.134977304 | 0.003853518 | 0.03682145 |
| C20orf173 | -0.135397782 | 0.001645686 | 0.022280492 |
| STK40 | -0.135489938 | 0.000321227 | 0.008505424 |
| KCNIP1 | -0.135598312 | 0.001659649 | 0.02241102 |
| TMC5 | -0.13600752 | 0.005657816 | 0.045065529 |
| SERPINB5 | -0.13687645 | 0.004931205 | 0.041818315 |
| RFFL | -0.137401179 | 0.001239066 | 0.018896969 |
| KRTAP4-1 | -0.137865335 | 0.006162335 | 0.047457803 |
| TNFRSF1B | -0.137911706 | 0.00219218 | 0.026545537 |
| PTF1A | -0.138383001 | 0.005045002 | 0.042421646 |
| GLRA1 | -0.139272634 | 0.006525534 | 0.048944654 |
| ASL | -0.139283868 | 0.001074259 | 0.017280922 |
| FSD1 | -0.13962491 | 0.000214944 | 0.006566803 |
| SLC13A5 | -0.139687919 | 9.93E-05 | 0.00415051 |
| CSRNP2 | -0.140091057 | 0.004197836 | 0.038232749 |
| RHPN2 | -0.140247582 | 0.003912401 | 0.037133194 |
| GJC1 | -0.140431198 | 0.001260823 | 0.019134987 |
| TACC1 | -0.140554696 | 0.000185952 | 0.005927609 |
| CSNK1E | -0.140807786 | 0.000597678 | 0.012012242 |
| CRHR2 | -0.141292052 | 0.001125187 | 0.017733957 |
| C10orf53 | -0.141315282 | 0.00055596 | 0.011434958 |
| GSR | -0.141474758 | 0.000168017 | 0.005549182 |
| KLHL36 | -0.14153981 | 0.000754452 | 0.01391414 |
| FGD2 | -0.141624543 | 0.004435963 | 0.039312091 |
| ITIH4 | -0.141733698 | 0.004037337 | 0.037522864 |
| DDX51 | -0.142243896 | 5.17E-05 | 0.002776524 |
| DRP2 | -0.142279112 | 0.002429224 | 0.027991862 |
| DMRTC2 | -0.142307977 | 0.003111983 | 0.032468148 |
| INPP1 | -0.142568017 | 0.001400896 | 0.020347657 |
| EFS | -0.142696935 | 0.004503303 | 0.039689385 |
| GABRB2 | -0.142884945 | 0.004522376 | 0.039727446 |
| PMEPA1 | -0.143051968 | 0.000680607 | 0.013087169 |
| GBX1 | -0.1432263 | 0.003512184 | 0.034623283 |
| DCST2 | -0.143405715 | 0.004193674 | 0.038217223 |
| LDHA | -0.143788708 | 0.003269642 | 0.033352491 |
| MTAP | -0.144178608 | 0.000332712 | 0.00860837 |
| C17orf64 | -0.144239812 | 0.006717026 | 0.049474459 |
| TGFBR2 | -0.144622852 | 0.000178335 | 0.005782834 |
| OR5AS1 | -0.145058958 | 0.002192972 | 0.026545537 |
| ENTPD3 | -0.145061894 | 0.003308754 | 0.033597239 |
| TPH2 | -0.145219971 | 0.00580277 | 0.045813386 |
| A2ML1 | -0.145845428 | 0.005471473 | 0.044307255 |
| PROX1 | -0.145854393 | 0.001609847 | 0.021948097 |
| HOXD8 | -0.146096712 | 0.001557491 | 0.021440998 |
| NFATC2 | -0.146442063 | 0.001303867 | 0.019446751 |
| IL11 | -0.146570012 | 0.005075808 | 0.04256564 |
| LONRF1 | -0.146679076 | 0.000731994 | 0.013638195 |
| WBP2 | -0.146892211 | 6.99E-05 | 0.003316372 |
| TMEM151B | -0.147054559 | 0.00010262 | 0.004263187 |
| SLC9A8 | -0.148050881 | 0.001912595 | 0.024336968 |
| MYT1L | -0.148524116 | 0.000829364 | 0.01471589 |
| PLCB1 | -0.148712497 | 0.000999939 | 0.016495274 |
| TMEM130 | -0.148808305 | 0.004010967 | 0.037407834 |
| SPATA2 | -0.14963798 | 0.004403473 | 0.039166131 |
| OR2AK2 | -0.150144858 | 0.005642153 | 0.045008222 |
| EXD1 | -0.150179322 | 0.000438368 | 0.010117587 |
| BSPH1 | -0.150430913 | 0.004165024 | 0.038000653 |
| RBMS1 | -0.15051001 | 0.000777952 | 0.014187365 |
| CDC42EP2 | -0.150984829 | 0.000359091 | 0.008937633 |
| SCMH1 | -0.150991909 | 0.002529844 | 0.0286421 |
| VPS4A | -0.151270202 | 0.00053757 | 0.011194707 |
| LOC400499 | -0.151581332 | 0.000296853 | 0.008158726 |
| LRRTM1 | -0.151984502 | 0.005412679 | 0.0441101 |
| DUSP9 | -0.152048581 | 0.006066948 | 0.047141417 |
| PKD1L1 | -0.152101498 | 4.49E-05 | 0.002497028 |
| FOXO3 | -0.152223171 | 0.002258666 | 0.026882797 |
| DCLK2 | -0.152378482 | 0.001449532 | 0.020763283 |
| ACER1 | -0.152798772 | 0.002978302 | 0.031495898 |
| LOC284009 | -0.152876958 | 0.004808782 | 0.041237823 |
| CPA1 | -0.153262746 | 0.003095751 | 0.032320473 |
| OPLAH | -0.153548949 | 0.000598951 | 0.012022292 |
| GPR162 | -0.153683608 | 0.00133777 | 0.019725451 |
| ESAM | -0.153916475 | 0.004342066 | 0.038859039 |
| CHRM1 | -0.154228446 | 0.006302112 | 0.047939198 |
| KLF9 | -0.154466541 | 0.000756923 | 0.01391414 |
| FHAD1 | -0.154659983 | 0.001077558 | 0.017280922 |
| ECE1 | -0.154894026 | 0.003025805 | 0.031883487 |
| SAMD4B | -0.154988848 | 0.000999263 | 0.016495274 |
| DDX3X | -0.155105304 | 0.005539539 | 0.044604116 |
| OR2K2 | -0.155114634 | 0.003777665 | 0.036432339 |
| PCDH1 | -0.155419664 | 0.002001306 | 0.025147266 |
| C15orf62 | -0.155840547 | 0.005343854 | 0.043821292 |
| PUS7 | -0.156237767 | 0.005176616 | 0.043077373 |
| RSPO1 | -0.156324896 | 0.003559204 | 0.034975979 |
| EFHC2 | -0.15650771 | 0.00347754 | 0.034435781 |
| SSBP3 | -0.156638121 | 0.001778788 | 0.023350095 |
| PLEKHM1 | -0.157267494 | 0.003953645 | 0.037365066 |
| NUP153 | -0.157289919 | 0.000324466 | 0.008511614 |
| RNF126 | -0.157389681 | 0.004433211 | 0.039312091 |
| DENND4B | -0.157429585 | 0.002437726 | 0.028006846 |
| TINAGL1 | -0.157732238 | 0.006388078 | 0.048239295 |
| HIPK2 | -0.158685383 | 0.003346501 | 0.033829495 |
| DLGAP4 | -0.158909781 | 0.000463699 | 0.010408815 |
| AKAP7 | -0.159048664 | 0.002536986 | 0.028702079 |
| NOL6 | -0.159064137 | 0.00078798 | 0.014273962 |
| DEFB119 | -0.159634779 | 0.003667903 | 0.035677418 |
| GMEB2 | -0.159639794 | 0.000320782 | 0.008505424 |
| EFCAB6 | -0.159640361 | 0.002926357 | 0.031115797 |
| NTRK3 | -0.160992456 | 0.000485109 | 0.010643652 |
| NID1 | -0.161624238 | 0.000987826 | 0.016330095 |
| RHBDL3 | -0.161841953 | 0.000315276 | 0.008397991 |
| NEK5 | -0.16220644 | 0.0001419 | 0.005089563 |
| TIMP3 | -0.162592478 | 0.002489147 | 0.028359959 |
| OR4D1 | -0.16263299 | 0.004274113 | 0.038560087 |
| CAMTA1 | -0.162935072 | 0.005598844 | 0.044846014 |
| KCNB2 | -0.163027076 | 0.006265521 | 0.047762379 |
| GPR12 | -0.163073065 | 0.002887421 | 0.03083741 |
| PSRC1 | -0.163133199 | 0.004470188 | 0.03944313 |
| FGFRL1 | -0.163461765 | 0.006215929 | 0.04769371 |
| DLK1 | -0.163486531 | 0.006412671 | 0.048387661 |
| APLP1 | -0.16364935 | 0.003692766 | 0.035835724 |
| SLC25A28 | -0.163959924 | 0.003477669 | 0.034435781 |
| ZNF597 | -0.164206012 | 0.006711634 | 0.049474459 |
| DEFB123 | -0.164392851 | 0.001913353 | 0.024336968 |
| REXO1 | -0.164482286 | 0.004670571 | 0.040494881 |
| DIRC1 | -0.164596527 | 0.000210868 | 0.006469951 |
| SORBS1 | -0.164753845 | 0.000434493 | 0.010057988 |
| CD93 | -0.164879503 | 0.000688829 | 0.013147763 |
| SV2A | -0.165274105 | 0.004139892 | 0.037949412 |
| ZNF331 | -0.165402518 | 0.000661251 | 0.012890257 |
| KBTBD11 | -0.165696585 | 0.000589542 | 0.011910273 |
| VN1R5 | -0.166750018 | 0.002243289 | 0.02678174 |
| PLEKHG2 | -0.167033151 | 0.000647908 | 0.012709783 |
| ADRB1 | -0.167275569 | 0.004528931 | 0.039736066 |
| NPC1 | -0.167570301 | 0.00084593 | 0.014869244 |
| AXIN1 | -0.167578635 | 0.000468189 | 0.010419382 |
| SCNN1A | -0.167916863 | 0.000684557 | 0.013114488 |
| KRT6A | -0.168032723 | 0.005202137 | 0.043179592 |
| MTUS1 | -0.168418696 | 0.002337112 | 0.027438582 |
| DNAH10 | -0.168973824 | 0.002692117 | 0.02959616 |
| CCDC86 | -0.169165237 | 0.001716159 | 0.02287624 |
| KRTAP1-3 | -0.16917597 | 0.003418127 | 0.03417248 |
| MAPKAPK2 | -0.169296808 | 0.000711237 | 0.013394668 |
| ABL2 | -0.169527326 | 0.005173543 | 0.043077373 |
| PNPLA5 | -0.170503699 | 0.000524564 | 0.011139707 |
| C8orf86 | -0.170560141 | 0.002434672 | 0.027996624 |
| MPPED2 | -0.170589181 | 0.004146017 | 0.037960825 |
| HSPA2 | -0.170671612 | 0.002091125 | 0.025735402 |
| HABP4 | -0.171025903 | 0.000284311 | 0.007997721 |
| SEC14L1 | -0.171162427 | 0.002576029 | 0.028912486 |
| BCOR | -0.17120122 | 0.000659749 | 0.012877103 |
| KLF2 | -0.171223061 | 0.001549882 | 0.021395929 |
| ELOVL4 | -0.171530891 | 0.003165816 | 0.032869474 |
| TNS3 | -0.171928025 | 0.000306683 | 0.008268203 |
| DKK4 | -0.172229819 | 0.00636034 | 0.04814669 |
| MAN1C1 | -0.172291166 | 0.006381906 | 0.048239295 |
| C21orf58 | -0.172769708 | 0.005342524 | 0.043821292 |
| CLEC4D | -0.172994308 | 0.005547099 | 0.04463371 |
| CYP4Z1 | -0.173294422 | 0.002734441 | 0.029808668 |
| VWC2 | -0.17333533 | 0.006413947 | 0.048387661 |
| PLOD2 | -0.173440498 | 0.003082909 | 0.032251334 |
| TAS2R40 | -0.173559084 | 8.97E-05 | 0.003885554 |
| TGM5 | -0.173857536 | 0.005169736 | 0.043077373 |
| IFITM2 | -0.173864302 | 0.000764869 | 0.014014482 |
| ETV3 | -0.174729795 | 0.004360375 | 0.038937998 |
| LGI2 | -0.17514203 | 0.000361862 | 0.008949321 |
| DDX56 | -0.175273934 | 0.000748867 | 0.013868299 |
| PMP22 | -0.175640362 | 0.00393092 | 0.037240802 |
| ANKRD30A | -0.175737915 | 0.004403546 | 0.039166131 |
| RGMA | -0.17581644 | 0.002093814 | 0.025748122 |
| KCNH3 | -0.175960407 | 0.005070301 | 0.042565351 |
| FOXP1 | -0.176125459 | 7.99E-05 | 0.003617533 |
| GOT1 | -0.176147116 | 3.74E-05 | 0.00222638 |
| ART3 | -0.176308534 | 0.002200114 | 0.026592836 |
| LOC401589 | -0.176402895 | 0.003450803 | 0.03430076 |
| EFCAB3 | -0.176502334 | 0.000258429 | 0.007472336 |
| VEGFA | -0.176681723 | 0.003800409 | 0.036554186 |
| CRTC3 | -0.176841702 | 4.18E-05 | 0.002423589 |
| BRPF1 | -0.177395847 | 0.000665078 | 0.012916298 |
| CAMK2N2 | -0.177877094 | 0.005205015 | 0.043179592 |
| RAPGEF1 | -0.177937142 | 0.000312593 | 0.00835516 |
| SHB | -0.178290853 | 0.0014583 | 0.020826531 |
| ODF3 | -0.178314858 | 0.003118702 | 0.032516443 |
| PCOLCE | -0.179881883 | 0.003984411 | 0.037407834 |
| CCDC9 | -0.180498185 | 0.002912866 | 0.031018905 |
| TIMP4 | -0.180891544 | 0.001461612 | 0.020826531 |
| PLEKHF1 | -0.181453541 | 0.002958523 | 0.031393446 |
| KLHL15 | -0.181654082 | 0.001952326 | 0.02469137 |
| AKNAD1 | -0.18207572 | 0.000961426 | 0.016081663 |
| TNFRSF10B | -0.182170255 | 0.000399996 | 0.009623789 |
| RCL1 | -0.182330648 | 0.002230602 | 0.026712276 |
| OR11L1 | -0.182556828 | 0.00450575 | 0.039689385 |
| FAM171A1 | -0.182831673 | 0.000887525 | 0.015285812 |
| NUFIP1 | -0.183046321 | 0.000341938 | 0.00870572 |
| DACT1 | -0.183524168 | 0.001205612 | 0.018513823 |
| ZNF584 | -0.183936473 | 0.002527196 | 0.0286421 |
| COL4A3 | -0.184000417 | 0.002495937 | 0.028402923 |
| OR2L13 | -0.184073437 | 0.004437956 | 0.039312091 |
| UPP1 | -0.184804953 | 3.54E-05 | 0.002162223 |
| SETBP1 | -0.185094661 | 9.69E-06 | 0.001033972 |
| INTS5 | -0.185149999 | 0.00051274 | 0.010986475 |
| RP1 | -0.185463954 | 0.000614543 | 0.012254506 |
| CEACAM1 | -0.185464434 | 7.62E-06 | 0.000902795 |
| ZBTB2 | -0.185901198 | 2.15E-05 | 0.001665597 |
| SPHK1 | -0.186956103 | 0.003498813 | 0.034535235 |
| NKRF | -0.18712996 | 0.004764158 | 0.041013418 |
| C9orf72 | -0.187314739 | 0.001136649 | 0.017806353 |
| XKR5 | -0.187450704 | 0.006822622 | 0.049968321 |
| STRC | -0.18762589 | 0.002414171 | 0.027936875 |
| ATG9B | -0.187659738 | 0.006259814 | 0.047762379 |
| LCMT2 | -0.187689729 | 3.08E-05 | 0.001970377 |
| AIPL1 | -0.187769771 | 0.001989988 | 0.025025261 |
| IRAK2 | -0.188040096 | 0.00258215 | 0.028922728 |
| SIM2 | -0.188499454 | 0.000552638 | 0.011417194 |
| KCTD13 | -0.188988171 | 0.002077905 | 0.025715106 |
| IER5 | -0.189285379 | 0.002144099 | 0.026212927 |
| CPEB4 | -0.189510574 | 0.001192581 | 0.018404553 |
| PLEKHA4 | -0.190017989 | 0.001340853 | 0.019733504 |
| ELN | -0.19073755 | 0.00038543 | 0.009383019 |
| UST | -0.190803764 | 0.00123481 | 0.018850548 |
| RNF175 | -0.190872694 | 0.002477023 | 0.028268899 |
| OR5B21 | -0.191140131 | 0.004464976 | 0.039441889 |
| TGFBR3 | -0.191218048 | 0.001634048 | 0.02216151 |
| KRT4 | -0.191239373 | 0.005807662 | 0.045813386 |
| GNA11 | -0.19128346 | 0.000161722 | 0.005364066 |
| RBM38 | -0.191748953 | 0.001777831 | 0.023350095 |
| CLDN2 | -0.191881744 | 0.001879266 | 0.024160219 |
| PI16 | -0.19247006 | 0.003845602 | 0.036768394 |
| METTL7B | -0.192587977 | 0.001123708 | 0.017728596 |
| PDE4D | -0.194116711 | 0.000570696 | 0.011620081 |
| CDH13 | -0.194333183 | 0.004525394 | 0.039727446 |
| NRIP3 | -0.194465845 | 0.005784219 | 0.045767706 |
| DPP6 | -0.194471134 | 0.000144651 | 0.005102472 |
| KCNA5 | -0.194912142 | 0.003423656 | 0.034183816 |
| DUSP5 | -0.19521608 | 0.0003379 | 0.008645358 |
| FHL1 | -0.195244081 | 0.001463868 | 0.020826531 |
| FLOT2 | -0.195263369 | 0.000297765 | 0.008169368 |
| CHL1 | -0.195850989 | 0.006561795 | 0.049120475 |
| GPM6B | -0.19595 | 0.004008072 | 0.037407834 |
| DENND2A | -0.195963834 | 0.002637139 | 0.029156622 |
| ETV1 | -0.196130103 | 0.001067602 | 0.017209961 |
| BIK | -0.196136362 | 0.006624432 | 0.049219502 |
| SYN1 | -0.196365653 | 0.002316719 | 0.027322878 |
| JAK3 | -0.196782043 | 0.002284544 | 0.0270484 |
| ANK2 | -0.196794716 | 0.002283553 | 0.0270484 |
| SH3BP4 | -0.196841925 | 0.000215291 | 0.006566803 |
| PRDM8 | -0.197127274 | 0.001530691 | 0.021298237 |
| ZFP36L2 | -0.197387251 | 0.003990854 | 0.037407834 |
| NDST1 | -0.197636623 | 0.004647833 | 0.040437183 |
| TRPC1 | -0.197815694 | 0.005200482 | 0.043179592 |
| LTBR | -0.198064804 | 5.97E-05 | 0.003024239 |
| BTG2 | -0.19806644 | 0.00178794 | 0.023431498 |
| RTP2 | -0.198194749 | 0.003429698 | 0.034222183 |
| BCL2L11 | -0.198355246 | 0.004001629 | 0.037407834 |
| RHBDD2 | -0.198551031 | 0.000556458 | 0.011434958 |
| MMP25 | -0.198730995 | 0.001892341 | 0.024188383 |
| RGS5 | -0.19916425 | 0.001015213 | 0.016641356 |
| PI4KA | -0.199599749 | 0.005870046 | 0.046128752 |
| TNFRSF8 | -0.199620131 | 0.003525389 | 0.034731447 |
| PNCK | -0.199657282 | 0.004690856 | 0.040548315 |
| ADARB2 | -0.200021947 | 0.001086007 | 0.017344824 |
| SNORA33 | -0.200284174 | 0.001300108 | 0.019427938 |
| STK31 | -0.200835764 | 0.000290601 | 0.008042951 |
| FAM43A | -0.200881542 | 0.006673014 | 0.049362142 |
| EFCAB1 | -0.201426861 | 0.000840614 | 0.014811891 |
| ICAM4 | -0.201534595 | 0.003978796 | 0.037407834 |
| ZNF280B | -0.201957088 | 0.004081465 | 0.037653557 |
| SLC24A4 | -0.202066674 | 0.00046939 | 0.010429985 |
| MAP1LC3B | -0.202468092 | 0.004705664 | 0.040622258 |
| PODXL | -0.202532074 | 0.000233858 | 0.007016824 |
| ITGA10 | -0.202705596 | 0.006702842 | 0.04944021 |
| GPR37L1 | -0.202921544 | 1.49E-05 | 0.001342261 |
| CNGB1 | -0.203139424 | 0.002639667 | 0.029163824 |
| PARVB | -0.203485004 | 0.001538173 | 0.021333243 |
| PROK1 | -0.204225344 | 0.006806667 | 0.049921976 |
| IRX2 | -0.204342953 | 0.005640622 | 0.045008222 |
| C10orf99 | -0.204720181 | 0.003842389 | 0.036760272 |
| PPIL6 | -0.204775366 | 0.000782617 | 0.014222423 |
| CENPO | -0.204903946 | 0.00069145 | 0.013181616 |
| C4orf17 | -0.204957731 | 0.004034568 | 0.037522864 |
| SMAD3 | -0.205251727 | 0.000210369 | 0.006467401 |
| TRIB1 | -0.205431018 | 0.0001609 | 0.005364066 |
| PHOX2B | -0.206147827 | 0.003071599 | 0.032197973 |
| LEPR | -0.206334066 | 0.002203068 | 0.026607867 |
| THPO | -0.206607759 | 0.001372594 | 0.020044159 |
| ZNF503 | -0.20684826 | 4.26E-05 | 0.00242566 |
| NEDD9 | -0.207290986 | 0.000356331 | 0.008937553 |
| FAM43B | -0.207527013 | 0.002542428 | 0.028721865 |
| EBI3 | -0.207679709 | 0.002032139 | 0.025398144 |
| ATP2B4 | -0.207773841 | 0.000334616 | 0.00860837 |
| SLITRK2 | -0.20876994 | 0.000237604 | 0.007081421 |
| USP29 | -0.208889467 | 0.004049079 | 0.037554025 |
| TRAF3IP2 | -0.209860287 | 6.49E-05 | 0.00317303 |
| CXCL13 | -0.209917141 | 0.004523578 | 0.039727446 |
| ITPR1 | -0.210068391 | 4.41E-05 | 0.002476599 |
| OR4D2 | -0.211018591 | 0.003194278 | 0.033038692 |
| PNMA2 | -0.211543705 | 0.000899141 | 0.015387277 |
| TMOD1 | -0.212449133 | 0.00095827 | 0.016063408 |
| AGPAT4 | -0.212513058 | 0.000212178 | 0.006497311 |
| NLRP9 | -0.212733412 | 0.001932187 | 0.024516393 |
| NCOA7 | -0.212782482 | 0.006586248 | 0.049210216 |
| SPATA12 | -0.212816528 | 0.00141266 | 0.020447238 |
| LENG9 | -0.213049487 | 0.003440301 | 0.034262051 |
| ALPL | -0.213129843 | 9.29E-06 | 0.001018105 |
| ABCA10 | -0.213268182 | 0.004801526 | 0.041218059 |
| TFAP4 | -0.213372708 | 0.004668128 | 0.040494881 |
| SALL4 | -0.213597816 | 0.00141301 | 0.020447238 |
| SNX33 | -0.213758713 | 0.000633584 | 0.012475988 |
| SNORA2B | -0.213767133 | 0.001403207 | 0.020362208 |
| PRSS38 | -0.214112357 | 0.003607259 | 0.035292149 |
| CHRNA10 | -0.214596584 | 0.000357495 | 0.008937553 |
| CSF2RB | -0.214854009 | 0.001347302 | 0.019790961 |
| CSN2 | -0.214914206 | 0.00258924 | 0.028957958 |
| CYP27B1 | -0.214938422 | 0.002665585 | 0.029429264 |
| RPH3A | -0.215100231 | 0.000429244 | 0.010010973 |
| USP49 | -0.215807537 | 0.005919448 | 0.046412768 |
| GRK7 | -0.216437353 | 0.001877004 | 0.024160219 |
| SLC4A8 | -0.216514529 | 0.006153657 | 0.047457803 |
| DPPA2 | -0.216820235 | 0.004953289 | 0.041935381 |
| GJA1 | -0.216920866 | 0.002191002 | 0.026545537 |
| CALY | -0.216981373 | 0.004544687 | 0.039806952 |
| SPATA13 | -0.216983379 | 0.001855766 | 0.023996926 |
| PER2 | -0.217260324 | 3.12E-06 | 0.000500813 |
| ORAI1 | -0.217859591 | 0.000751583 | 0.013902043 |
| CD164L2 | -0.218039832 | 0.002277932 | 0.0270484 |
| CDKN1A | -0.218301155 | 0.003189513 | 0.033011351 |
| RAG2 | -0.218463659 | 0.005033338 | 0.042392314 |
| CA4 | -0.218673515 | 0.001134847 | 0.017805276 |
| SPRY2 | -0.21992188 | 3.03E-05 | 0.001947753 |
| CCDC57 | -0.220293335 | 0.005006037 | 0.042276825 |
| DUS3L | -0.220996104 | 0.001844473 | 0.02395043 |
| RASL10A | -0.221561067 | 0.000717273 | 0.013459472 |
| CITED4 | -0.22166569 | 2.91E-05 | 0.001929664 |
| GNAT1 | -0.221676619 | 0.002627155 | 0.029119713 |
| TMEM185B | -0.221735847 | 0.004816545 | 0.041281641 |
| ZNF408 | -0.222025472 | 0.000419303 | 0.009844421 |
| MAL | -0.222649482 | 0.001545599 | 0.021390864 |
| CSF3 | -0.222680118 | 0.000418824 | 0.009844421 |
| SSX4B | -0.222921436 | 0.005607193 | 0.044846014 |
| MAK | -0.223018722 | 0.000591856 | 0.011941529 |
| SPINK4 | -0.223661396 | 0.00068208 | 0.0130993 |
| SIRPA | -0.223988396 | 0.00217808 | 0.026472966 |
| ACSS1 | -0.22407042 | 0.001190591 | 0.018404553 |
| GFI1B | -0.224371906 | 0.000553104 | 0.011417194 |
| LAMC2 | -0.224747598 | 0.000830583 | 0.01471589 |
| PLXNA3 | -0.225430749 | 0.004954823 | 0.041935381 |
| SLC26A8 | -0.225873877 | 0.000807797 | 0.014477064 |
| ANKDD1A | -0.226124693 | 0.000358979 | 0.008937633 |
| CDC42EP3 | -0.226251901 | 0.00593658 | 0.046476822 |
| CSF3R | -0.226353918 | 9.81E-05 | 0.004125979 |
| ATG2A | -0.226437821 | 1.57E-05 | 0.001387129 |
| AMDHD1 | -0.226445293 | 0.000116991 | 0.004572643 |
| GLIS3 | -0.226762255 | 6.25E-06 | 0.000790322 |
| TLE2 | -0.226843635 | 0.002073287 | 0.02569177 |
| KDM6B | -0.226845767 | 0.005409936 | 0.0441101 |
| KRT80 | -0.227073764 | 0.000156224 | 0.005271614 |
| ERF | -0.227450536 | 0.000281272 | 0.007955391 |
| SH3TC1 | -0.227529298 | 0.000161261 | 0.005364066 |
| SERTAD4 | -0.227754292 | 0.000462205 | 0.010408815 |
| SNORA71C | -0.228028207 | 0.006625459 | 0.049219502 |
| FGF9 | -0.228062 | 0.006164339 | 0.047457803 |
| OR52I2 | -0.228660203 | 0.002415473 | 0.027936875 |
| SCG3 | -0.228879175 | 0.005796283 | 0.045813386 |
| TCF7L2 | -0.229042468 | 6.65E-06 | 0.000820606 |
| ANGPTL4 | -0.229174908 | 0.003894404 | 0.036995789 |
| C7orf26 | -0.229542961 | 2.92E-05 | 0.001929664 |
| CDH19 | -0.229773348 | 8.93E-05 | 0.003879483 |
| CLVS2 | -0.230665215 | 0.003220418 | 0.033205641 |
| HPCA | -0.23127418 | 0.004767677 | 0.041021005 |
| KRT72 | -0.231389492 | 0.000706566 | 0.013355221 |
| GALNT3 | -0.231573011 | 0.003349024 | 0.033829495 |
| EGFLAM | -0.231734886 | 8.76E-05 | 0.003873227 |
| MYADM | -0.231826359 | 0.000489235 | 0.010702716 |
| NOS3 | -0.23207094 | 0.001750712 | 0.023158048 |
| ARHGEF5 | -0.232521122 | 0.001498767 | 0.021004337 |
| CHSY1 | -0.23321709 | 1.75E-06 | 0.000349533 |
| VEGFC | -0.233315096 | 0.000143807 | 0.005095796 |
| WT1 | -0.233562199 | 0.00043253 | 0.010042454 |
| OR2B2 | -0.234624882 | 0.005667337 | 0.045118267 |
| GPR27 | -0.234862739 | 0.000897799 | 0.015381231 |
| LATS2 | -0.234895299 | 1.29E-05 | 0.001228366 |
| ADM | -0.235478525 | 0.000884746 | 0.015285812 |
| DAPL1 | -0.235754988 | 0.000981903 | 0.016299748 |
| TAC1 | -0.235870504 | 4.20E-05 | 0.002423589 |
| NKD2 | -0.236250995 | 0.001429134 | 0.020565782 |
| LTBP4 | -0.236513107 | 0.005642228 | 0.045008222 |
| GREM2 | -0.236894157 | 0.0006249 | 0.012345222 |
| MNT | -0.237453313 | 2.62E-05 | 0.001834565 |
| RAP1GAP | -0.237555524 | 0.000728412 | 0.0136192 |
| ADRB2 | -0.237855638 | 0.000113395 | 0.004546335 |
| NAV2 | -0.238283333 | 9.53E-06 | 0.00102961 |
| IL15RA | -0.238877172 | 0.000119567 | 0.00461533 |
| CSK | -0.238895272 | 1.67E-05 | 0.00143137 |
| VWF | -0.239644637 | 0.006042154 | 0.047042914 |
| NXNL2 | -0.239903135 | 0.002066529 | 0.025676464 |
| SIN3B | -0.239913667 | 2.31E-05 | 0.001731911 |
| MYL9 | -0.240853655 | 0.000861512 | 0.015041175 |
| PELI2 | -0.241341127 | 0.001252902 | 0.019070594 |
| IL20 | -0.241414279 | 0.000116767 | 0.004572643 |
| DNAJC27 | -0.241994202 | 4.28E-05 | 0.002428068 |
| SLC25A25 | -0.24233731 | 0.001271823 | 0.019245609 |
| CHST3 | -0.242355538 | 0.001713055 | 0.02287624 |
| TRH | -0.242754607 | 0.005533476 | 0.044604116 |
| C5AR1 | -0.24279312 | 0.006464779 | 0.048559197 |
| SNCAIP | -0.242819907 | 0.001281534 | 0.019277901 |
| HPDL | -0.244563689 | 0.002472318 | 0.028237435 |
| NXT1 | -0.244676354 | 3.49E-05 | 0.002137266 |
| CHST10 | -0.245221377 | 0.002194495 | 0.026545537 |
| VPS37B | -0.245817543 | 1.81E-05 | 0.001485833 |
| CYP21A2 | -0.245977185 | 0.005325682 | 0.043764558 |
| ANGPT4 | -0.246054882 | 0.005805469 | 0.045813386 |
| PRDM12 | -0.246187309 | 0.000142976 | 0.005089563 |
| ATF3 | -0.24651858 | 0.00018554 | 0.005927609 |
| FAM89A | -0.24672457 | 7.04E-05 | 0.003316372 |
| SAG | -0.247007534 | 7.00E-05 | 0.003316372 |
| HOMER1 | -0.247302187 | 8.56E-05 | 0.003804737 |
| CCL7 | -0.247361374 | 0.000525235 | 0.011139707 |
| OR7C1 | -0.24739602 | 0.00180759 | 0.023589652 |
| TYRO3 | -0.247502484 | 0.003438389 | 0.034262051 |
| SLC5A1 | -0.248355819 | 0.0004678 | 0.010419382 |
| ZDHHC19 | -0.248854215 | 1.07E-05 | 0.001097867 |
| ZNF367 | -0.249034379 | 0.000339841 | 0.008666506 |
| SLC25A18 | -0.250496888 | 0.00015918 | 0.005341935 |
| SIRPB1 | -0.250798959 | 0.004380447 | 0.039072377 |
| DUSP8 | -0.250831505 | 0.001135435 | 0.017805276 |
| DTX1 | -0.251458858 | 0.004469006 | 0.03944313 |
| ST8SIA2 | -0.251570901 | 0.002795997 | 0.030204538 |
| ICAM1 | -0.251667371 | 0.001662926 | 0.022435805 |
| TNIP3 | -0.251823606 | 0.004083018 | 0.037653557 |
| ZSWIM4 | -0.252307057 | 3.70E-05 | 0.00222638 |
| NOS1AP | -0.252390985 | 0.001596107 | 0.021812631 |
| PASD1 | -0.252886502 | 0.003978735 | 0.037407834 |
| MAG | -0.252905372 | 0.001854733 | 0.023996926 |
| MYBPHL | -0.253326938 | 0.003981891 | 0.037407834 |
| SOX7 | -0.25360935 | 0.000413328 | 0.009807599 |
| GPR32 | -0.253719951 | 0.0020327 | 0.025398144 |
| CADM2 | -0.254202952 | 9.01E-05 | 0.003892711 |
| PHYHIPL | -0.254364836 | 0.001875158 | 0.024160219 |
| C3orf52 | -0.254561074 | 0.000448954 | 0.010255396 |
| CPLX1 | -0.254723816 | 0.000825701 | 0.014696344 |
| DPEP3 | -0.254879701 | 0.00028527 | 0.008010208 |
| ELL | -0.255234911 | 0.00015531 | 0.00525689 |
| FGFR1 | -0.255579097 | 2.29E-06 | 0.000414391 |
| KRTCAP3 | -0.25582417 | 0.002838476 | 0.03049749 |
| EPAS1 | -0.256051317 | 9.16E-10 | 2.85E-06 |
| IGFBP6 | -0.256249016 | 0.002105612 | 0.025852326 |
| GNA15 | -0.256816025 | 0.00090897 | 0.015470396 |
| CD9 | -0.256909186 | 0.000350113 | 0.008842903 |
| RFX2 | -0.257058483 | 8.04E-05 | 0.003625687 |
| WNT3 | -0.257407667 | 1.78E-05 | 0.001474842 |
| TEAD2 | -0.257409995 | 0.000177768 | 0.005782834 |
| KRTAP3-2 | -0.257471076 | 0.000673654 | 0.013017832 |
| NR4A3 | -0.257592128 | 0.000664603 | 0.012916298 |
| FAM187B | -0.258317944 | 0.000499233 | 0.010801208 |
| OR2A7 | -0.258331714 | 0.004488019 | 0.039578019 |
| TSC22D2 | -0.258885111 | 2.60E-05 | 0.001834565 |
| PMP2 | -0.25910725 | 0.000242089 | 0.007186894 |
| KIF13A | -0.259416688 | 4.54E-07 | 0.000154657 |
| SGMS2 | -0.259676237 | 0.002074368 | 0.02569177 |
| SCN7A | -0.26033245 | 0.00321694 | 0.033205641 |
| SLC35F1 | -0.260745878 | 3.79E-05 | 0.002250304 |
| CHRD | -0.26097577 | 0.001069781 | 0.017227233 |
| LRRC8B | -0.261130573 | 0.000224058 | 0.006781033 |
| ZNF462 | -0.261311814 | 0.00093435 | 0.015778106 |
| TRPM1 | -0.262010253 | 0.002185241 | 0.026536773 |
| EEPD1 | -0.262192403 | 0.000141777 | 0.005089563 |
| ITPRIP | -0.262500429 | 0.000137151 | 0.00500826 |
| OR2B11 | -0.263440306 | 0.00064448 | 0.012658505 |
| CCDC68 | -0.263959201 | 6.56E-06 | 0.000820606 |
| AHDC1 | -0.264335918 | 8.09E-05 | 0.003636639 |
| HAL | -0.264354851 | 0.002400117 | 0.0279045 |
| AKAP12 | -0.264408739 | 0.000141135 | 0.005089563 |
| ARG2 | -0.264841528 | 0.000470006 | 0.010429985 |
| USP43 | -0.264867869 | 0.000888562 | 0.015285812 |
| RSPH9 | -0.26507907 | 0.002894268 | 0.030880135 |
| MKX | -0.265440371 | 0.000346401 | 0.008804914 |
| ZCCHC14 | -0.265549606 | 4.18E-06 | 0.00060788 |
| CDS1 | -0.265685952 | 2.85E-05 | 0.001921896 |
| GPR152 | -0.265885174 | 0.003602328 | 0.035288294 |
| PRPH | -0.266110189 | 0.003625644 | 0.035383012 |
| SCGB3A1 | -0.266795234 | 0.001471031 | 0.020843037 |
| GABRB1 | -0.266869935 | 0.000491162 | 0.010716018 |
| SLC22A4 | -0.268085573 | 0.000302579 | 0.008228866 |
| NUAK2 | -0.268357491 | 0.000132071 | 0.004892406 |
| ST6GALNAC6 | -0.268633745 | 8.92E-08 | 6.60E-05 |
| FJX1 | -0.26927163 | 0.004200296 | 0.038232771 |
| RHOB | -0.269329392 | 0.000290651 | 0.008042951 |
| HCN4 | -0.269478208 | 0.005780513 | 0.04576166 |
| CDKL2 | -0.26974436 | 0.00168295 | 0.022588413 |
| FOXC2 | -0.269803016 | 0.00011655 | 0.004572643 |
| HUNK | -0.270339239 | 9.59E-05 | 0.004058637 |
| DYDC2 | -0.270532136 | 0.003421255 | 0.03418179 |
| CASS4 | -0.271064792 | 0.000236879 | 0.007081421 |
| SEMA4B | -0.271328737 | 0.000519083 | 0.011054392 |
| ADCYAP1 | -0.271712627 | 0.00038991 | 0.009462473 |
| TEX28 | -0.27263854 | 0.001063905 | 0.017185254 |
| OR2A42 | -0.272656021 | 0.000245982 | 0.007233459 |
| P2RX1 | -0.273062569 | 0.000525913 | 0.011139707 |
| RBM44 | -0.273783763 | 0.000276184 | 0.007840004 |
| SRF | -0.273796254 | 1.09E-05 | 0.00110618 |
| HOXD13 | -0.273901644 | 0.003279457 | 0.033408793 |
| OSR1 | -0.273976775 | 0.001924707 | 0.024461387 |
| ASIP | -0.274132602 | 3.59E-05 | 0.002170617 |
| PLAUR | -0.274658732 | 0.000676108 | 0.013049058 |
| LDLR | -0.274721916 | 0.000493604 | 0.010739165 |
| CENPV | -0.274878009 | 0.0001465 | 0.005109771 |
| NANOS2 | -0.276385553 | 0.002353868 | 0.027572873 |
| CPT1C | -0.276427414 | 0.003353017 | 0.033847849 |
| DNAJC5G | -0.276438899 | 0.000537559 | 0.011194707 |
| NAMPT | -0.276514152 | 0.003225177 | 0.033217916 |
| CPLX3 | -0.276536377 | 0.000914247 | 0.01548761 |
| B3GALT1 | -0.277046746 | 0.002715507 | 0.02970635 |
| SH2D7 | -0.27800977 | 0.004335526 | 0.038849909 |
| SNORA71A | -0.278255062 | 0.002457342 | 0.02814038 |
| RASL11A | -0.278307348 | 6.99E-05 | 0.003316372 |
| SLC11A1 | -0.278481292 | 0.000267595 | 0.007652045 |
| ITGB8 | -0.280155107 | 8.84E-05 | 0.003879483 |
| TSPAN16 | -0.280546076 | 0.003610251 | 0.03529922 |
| TUBB6 | -0.281958293 | 0.000563776 | 0.011524445 |
| B4GALT1 | -0.282021044 | 0.001740571 | 0.023063301 |
| EGR3 | -0.282064055 | 1.42E-05 | 0.001321011 |
| OR13G1 | -0.28218812 | 0.000965907 | 0.016139252 |
| RNU11 | -0.282296405 | 2.12E-05 | 0.001660821 |
| SLC7A2 | -0.284021557 | 2.07E-06 | 0.000384217 |
| SEZ6L | -0.284184047 | 0.000298322 | 0.008170241 |
| TNFRSF1A | -0.284472318 | 8.55E-05 | 0.003804737 |
| KLK13 | -0.285446504 | 0.002405971 | 0.02793081 |
| KL | -0.286486943 | 0.004850489 | 0.041467562 |
| TMIGD1 | -0.287615311 | 0.000462698 | 0.010408815 |
| RAB43 | -0.287795727 | 2.41E-05 | 0.00176432 |
| SLC22A8 | -0.287850435 | 0.001508819 | 0.021069295 |
| LRIG1 | -0.288091922 | 0.00115541 | 0.01800957 |
| DEFB126 | -0.288108889 | 0.002242877 | 0.02678174 |
| MSX1 | -0.288374345 | 0.00045348 | 0.010313346 |
| ST8SIA5 | -0.288425736 | 0.002413995 | 0.027936875 |
| PPP1R10 | -0.288719112 | 4.70E-05 | 0.002572083 |
| IKZF4 | -0.288790298 | 0.000478748 | 0.01053382 |
| OXCT2 | -0.288924108 | 0.000839697 | 0.014811891 |
| PTGER2 | -0.289018972 | 0.000353865 | 0.008893606 |
| CDH4 | -0.290897361 | 0.001464362 | 0.020826531 |
| TLN2 | -0.291355093 | 6.34E-05 | 0.003113372 |
| CH25H | -0.291440672 | 0.002765463 | 0.030041577 |
| CDC42EP1 | -0.292288128 | 0.00515879 | 0.043052651 |
| IL10 | -0.292802932 | 0.000150177 | 0.005164967 |
| LRG1 | -0.292908086 | 0.003921156 | 0.037170938 |
| KIR3DL3 | -0.292945221 | 0.002478708 | 0.028268899 |
| PELI1 | -0.293001426 | 4.17E-05 | 0.002423589 |
| CREB3L3 | -0.293138849 | 0.001245259 | 0.018972817 |
| IL1RN | -0.293229485 | 0.000779167 | 0.014188647 |
| DUSP6 | -0.29413081 | 0.000170594 | 0.005610477 |
| TEAD4 | -0.294695341 | 1.14E-07 | 7.22E-05 |
| OLFML2A | -0.294762894 | 0.000206572 | 0.006375855 |
| RNF152 | -0.294878947 | 0.004885696 | 0.041644873 |
| CIT | -0.295285092 | 0.000463262 | 0.010408815 |
| LONRF2 | -0.295634253 | 0.00026414 | 0.007595129 |
| MAMDC2 | -0.295834539 | 0.006339083 | 0.048126295 |
| BCL2A1 | -0.296537727 | 0.006517993 | 0.048911674 |
| SYNPO2L | -0.296687887 | 0.005956663 | 0.046563741 |
| TNXB | -0.297016049 | 1.59E-05 | 0.00139084 |
| OR4F4 | -0.297018412 | 0.006571079 | 0.049120475 |
| SOX3 | -0.29703915 | 0.003840064 | 0.036760272 |
| LIPN | -0.29799046 | 0.000111672 | 0.004500449 |
| TMC7 | -0.298103798 | 0.000388767 | 0.009449473 |
| SLC23A2 | -0.298129622 | 1.14E-05 | 0.001125182 |
| PAPPA | -0.299579771 | 0.00113125 | 0.017775474 |
| OR1L3 | -0.299841705 | 0.000569887 | 0.011618819 |
| TRIM15 | -0.300338965 | 0.000696905 | 0.013253127 |
| TNFAIP8L3 | -0.300825191 | 0.000593525 | 0.011952078 |
| TP53TG3 | -0.301012131 | 0.000126111 | 0.004773209 |
| HTR3C | -0.301160382 | 0.001947507 | 0.024670541 |
| SERPINB2 | -0.301467546 | 0.000705781 | 0.013355221 |
| OR4K13 | -0.301938036 | 0.001814293 | 0.023657283 |
| JUN | -0.302035293 | 0.004085041 | 0.037653557 |
| OSM | -0.302980833 | 0.000334624 | 0.00860837 |
| SERTAD1 | -0.304382792 | 5.72E-05 | 0.00294594 |
| ITLN2 | -0.304869161 | 0.000268339 | 0.007659221 |
| MT1M | -0.305044024 | 0.003236037 | 0.03323964 |
| CD19 | -0.306502197 | 0.001232895 | 0.018839805 |
| RASIP1 | -0.30676072 | 0.000130728 | 0.004865083 |
| ETS2 | -0.307060781 | 0.000105961 | 0.004337705 |
| BATF3 | -0.307226927 | 0.001988403 | 0.025025261 |
| CYP2C19 | -0.307488258 | 0.000468127 | 0.010419382 |
| TNFAIP6 | -0.308416779 | 0.000398508 | 0.009611544 |
| GDF5 | -0.308961339 | 0.00175602 | 0.023169339 |
| GEM | -0.309505273 | 0.000625356 | 0.012345222 |
| DEFB118 | -0.310226348 | 0.001715744 | 0.02287624 |
| ACVR2B | -0.311503832 | 0.000779847 | 0.014188647 |
| EDN3 | -0.311585606 | 2.01E-05 | 0.001609833 |
| IRS2 | -0.31248085 | 0.004850743 | 0.041467562 |
| CCDC62 | -0.312839307 | 0.000146041 | 0.005109771 |
| ERN1 | -0.313056767 | 8.54E-06 | 0.00095621 |
| SULT1C3 | -0.314180533 | 0.000134931 | 0.004950452 |
| HAS2 | -0.314517927 | 7.84E-05 | 0.003577025 |
| SBNO2 | -0.315321111 | 0.000160059 | 0.005354585 |
| CALCA | -0.315951706 | 3.83E-06 | 0.000577691 |
| POU4F3 | -0.316073002 | 0.001098401 | 0.017453242 |
| HDC | -0.316750252 | 0.000150407 | 0.005164967 |
| C2orf66 | -0.316977048 | 0.002324109 | 0.027328462 |
| PRR22 | -0.31712463 | 6.99E-05 | 0.003316372 |
| HAS1 | -0.317708748 | 1.06E-06 | 0.000248265 |
| STC1 | -0.317938304 | 4.99E-05 | 0.002696 |
| URB2 | -0.318715043 | 0.000175831 | 0.005758382 |
| XKR4 | -0.318940699 | 6.30E-05 | 0.003112037 |
| CXCL2 | -0.320402947 | 0.00426454 | 0.038546881 |
| LPAR1 | -0.320679288 | 5.24E-06 | 0.000690685 |
| MAPK4 | -0.320994577 | 0.002151552 | 0.02625208 |
| MAP3K8 | -0.321441885 | 0.00015524 | 0.00525689 |
| SLC2A3 | -0.322144767 | 0.000806906 | 0.014477064 |
| ARID5B | -0.323220973 | 1.73E-05 | 0.001448484 |
| TCF7L1 | -0.323792843 | 3.95E-07 | 0.000154657 |
| IRX3 | -0.324656662 | 0.000799619 | 0.014430249 |
| DAND5 | -0.32493383 | 0.001468177 | 0.020843037 |
| FAM9B | -0.325830078 | 0.000177464 | 0.005782834 |
| MAP3K14 | -0.327126874 | 0.000151789 | 0.005200945 |
| FLNC | -0.327202305 | 0.003221092 | 0.033205641 |
| LRP4 | -0.328297496 | 2.77E-05 | 0.00189192 |
| APOBEC3A | -0.3283326 | 0.00068039 | 0.013087169 |
| ID4 | -0.329308522 | 0.00360659 | 0.035292149 |
| CNN1 | -0.330137085 | 0.002174808 | 0.026472073 |
| RRP12 | -0.33121409 | 0.000121709 | 0.004673688 |
| PPARGC1A | -0.332350781 | 6.07E-05 | 0.003053704 |
| MCAM | -0.332395929 | 0.000788928 | 0.014273962 |
| IL1B | -0.332705659 | 0.001777697 | 0.023350095 |
| IL18RAP | -0.333974338 | 6.82E-05 | 0.003302948 |
| FCAR | -0.33437913 | 1.89E-06 | 0.000366842 |
| TAGLN | -0.334896633 | 0.000617983 | 0.012290261 |
| SOX17 | -0.335820866 | 0.000328365 | 0.008556188 |
| MMP10 | -0.336204776 | 0.000311374 | 0.008336903 |
| TNR | -0.336623267 | 3.45E-05 | 0.002123901 |
| FGF14 | -0.338216998 | 8.84E-05 | 0.003879483 |
| NHLH1 | -0.339593422 | 0.000206548 | 0.006375855 |
| ALOX12B | -0.340042627 | 0.000403019 | 0.009652841 |
| RAMP1 | -0.340245498 | 5.94E-05 | 0.003024239 |
| KLF6 | -0.341069408 | 0.000604293 | 0.012082762 |
| APOD | -0.343088378 | 0.006342803 | 0.048131042 |
| SPSB1 | -0.345114083 | 0.0028781 | 0.030792108 |
| NLRP8 | -0.345974113 | 5.31E-05 | 0.002810441 |
| CXCL1 | -0.34935323 | 0.000244685 | 0.007225523 |
| CMYA5 | -0.34943993 | 3.32E-06 | 0.00051659 |
| TMPRSS2 | -0.349560002 | 0.002703943 | 0.029621508 |
| SLC8A2 | -0.350559404 | 0.000351424 | 0.008860217 |
| IL1RL1 | -0.350971244 | 0.001203046 | 0.018492678 |
| TSPAN13 | -0.351545073 | 0.000468041 | 0.010419382 |
| KLF11 | -0.351642525 | 0.000270664 | 0.007711451 |
| ZNF446 | -0.352147588 | 6.20E-07 | 0.000195782 |
| TACSTD2 | -0.35217363 | 7.35E-05 | 0.003421666 |
| PSORS1C2 | -0.35312047 | 0.001471594 | 0.020843037 |
| GPR142 | -0.355774951 | 0.000325539 | 0.008525402 |
| THBD | -0.35685384 | 0.000742935 | 0.013791283 |
| RRS1 | -0.359369833 | 0.000413263 | 0.009807599 |
| ODF3L1 | -0.359371236 | 5.71E-05 | 0.00294594 |
| INHBB | -0.361928369 | 2.63E-05 | 0.001834565 |
| TNFRSF10D | -0.365285956 | 0.000360562 | 0.008945617 |
| CISH | -0.369251273 | 0.003887033 | 0.036982678 |
| MAFF | -0.369715567 | 2.31E-05 | 0.001731911 |
| PPRC1 | -0.370964813 | 8.47E-06 | 0.000955089 |
| PCDH20 | -0.371949856 | 0.000109259 | 0.004426119 |
| CRISPLD2 | -0.372830742 | 5.23E-05 | 0.002794648 |
| GFPT2 | -0.373104585 | 0.000323136 | 0.008505424 |
| EFHD1 | -0.375446844 | 0.00100882 | 0.016589008 |
| PIM3 | -0.375609284 | 4.67E-06 | 0.000648352 |
| FOXO1 | -0.376369147 | 1.73E-06 | 0.000349533 |
| SPATA3 | -0.377779878 | 0.000105276 | 0.004329786 |
| SDS | -0.379158284 | 0.002833717 | 0.030484997 |
| SERPINB9 | -0.379626266 | 0.000203288 | 0.006299485 |
| EDN1 | -0.380897256 | 1.82E-08 | 2.36E-05 |
| C2CD4A | -0.381782327 | 0.000419211 | 0.009844421 |
| MLF1 | -0.382756124 | 4.14E-07 | 0.000154657 |
| PIM1 | -0.383322821 | 0.000816854 | 0.014566511 |
| KLF5 | -0.384199561 | 2.87E-05 | 0.001921896 |
| RALGDS | -0.384736083 | 2.68E-05 | 0.001858871 |
| EMP1 | -0.386274534 | 0.000762957 | 0.013995933 |
| RGS2 | -0.387918229 | 0.000835957 | 0.014794252 |
| OR2L8 | -0.390300557 | 0.005524463 | 0.044597067 |
| GAD2 | -0.393692696 | 0.001685984 | 0.022609625 |
| DHRS13 | -0.393998906 | 9.34E-05 | 0.003982152 |
| SIPA1L2 | -0.396061469 | 0.000271651 | 0.007725428 |
| SFN | -0.398253793 | 1.66E-05 | 0.001423872 |
| HBEGF | -0.398555951 | 6.65E-05 | 0.003242333 |
| FAM169B | -0.399421589 | 0.000149086 | 0.005153741 |
| SCNN1B | -0.400076756 | 9.16E-05 | 0.003927403 |
| ELF3 | -0.401522633 | 2.02E-05 | 0.001609833 |
| TMEM158 | -0.40211267 | 2.94E-06 | 0.000491131 |
| CEBPD | -0.402380745 | 3.95E-06 | 0.000591323 |
| PFKFB3 | -0.402418646 | 3.15E-07 | 0.00013616 |
| SDC4 | -0.402502309 | 6.73E-06 | 0.000823936 |
| FILIP1L | -0.408214772 | 3.46E-07 | 0.00014537 |
| S100A12 | -0.419802902 | 0.006668008 | 0.049362142 |
| NFKBIZ | -0.421581641 | 5.71E-05 | 0.00294594 |
| LIF | -0.421696637 | 4.31E-05 | 0.002436365 |
| SPRY4 | -0.427279331 | 4.81E-10 | 1.87E-06 |
| TNIK | -0.429289243 | 2.85E-08 | 3.01E-05 |
| THBS1 | -0.430903151 | 0.000493094 | 0.010739165 |
| IER5L | -0.433976258 | 7.59E-05 | 0.003481558 |
| MIDN | -0.435868678 | 1.72E-06 | 0.000349533 |
| NFE2 | -0.436049161 | 2.19E-05 | 0.001675729 |
| KLF4 | -0.442733593 | 9.29E-06 | 0.001018105 |
| GADD45B | -0.443329964 | 1.58E-05 | 0.001387129 |
| TGFB3 | -0.44434802 | 0.000154141 | 0.00525689 |
| GPRC5A | -0.446998851 | 6.26E-05 | 0.003110225 |
| CMTM2 | -0.447376916 | 4.95E-06 | 0.000674882 |
| HIVEP1 | -0.4484461 | 5.86E-08 | 5.70E-05 |
| KIAA0040 | -0.45175097 | 3.45E-05 | 0.002123901 |
| MYBPH | -0.458757227 | 1.47E-05 | 0.001334332 |
| PTX3 | -0.462015258 | 5.76E-06 | 0.000734272 |
| MYOM1 | -0.462088275 | 0.001142424 | 0.017878822 |
| CLCF1 | -0.462846754 | 1.61E-08 | 2.27E-05 |
| PADI4 | -0.467440392 | 1.07E-06 | 0.000248265 |
| PROK2 | -0.46920745 | 0.000519463 | 0.011054392 |
| SIK1 | -0.470568943 | 0.000141787 | 0.005089563 |
| PNRC1 | -0.470733617 | 0.000113379 | 0.004546335 |
| MT1B | -0.470887857 | 0.000559499 | 0.011482269 |
| S100P | -0.474747245 | 5.44E-05 | 0.002868219 |
| BCL6 | -0.474773825 | 9.64E-07 | 0.000237921 |
| IL4R | -0.480449778 | 4.63E-07 | 0.000154657 |
| FOXC1 | -0.480827745 | 2.56E-05 | 0.001824474 |
| C2CD4B | -0.491449088 | 1.37E-06 | 0.000296236 |
| SOCS3 | -0.491484032 | 4.57E-06 | 0.000644271 |
| BACH2 | -0.493896411 | 2.27E-07 | 0.000104645 |
| GRAMD4 | -0.494623365 | 2.07E-06 | 0.000384217 |
| RND1 | -0.49684528 | 0.001555018 | 0.021430884 |
| PTGS2 | -0.497935574 | 1.68E-06 | 0.000349533 |
| FOSL2 | -0.507127157 | 3.47E-06 | 0.000534102 |
| BCL3 | -0.518792526 | 2.40E-10 | 1.25E-06 |
| CCL2 | -0.521525668 | 1.06E-06 | 0.000248265 |
| ARL14 | -0.521806999 | 1.36E-07 | 8.13E-05 |
| ACTG2 | -0.522053229 | 4.96E-05 | 0.002687809 |
| P4HA1 | -0.530307378 | 3.33E-05 | 0.002070754 |
| ZFP36 | -0.539547344 | 7.06E-06 | 0.000851068 |
| NR4A2 | -0.53968542 | 7.96E-06 | 0.000916805 |
| SERPINE1 | -0.53979216 | 0.001555378 | 0.021430884 |
| IGFBP2 | -0.542020771 | 0.000128083 | 0.004801088 |
| NR4A1 | -0.544279116 | 2.29E-07 | 0.000104645 |
| FAM107A | -0.54434649 | 3.20E-06 | 0.000502731 |
| RASD1 | -0.553152383 | 0.000192585 | 0.006091941 |
| PHLDA1 | -0.553366925 | 2.26E-06 | 0.000413268 |
| PPP1R15A | -0.554712901 | 1.66E-09 | 4.31E-06 |
| ADAMTS1 | -0.560251303 | 3.28E-05 | 0.002059532 |
| IER3 | -0.582696172 | 6.94E-09 | 1.20E-05 |
| GADD45G | -0.583336669 | 0.001435512 | 0.020600392 |
| KCNK1 | -0.594546321 | 8.27E-08 | 6.43E-05 |
| EPHA2 | -0.614013784 | 1.10E-10 | 8.56E-07 |
| APOLD1 | -0.620096554 | 2.76E-05 | 0.001891738 |
| SOCS2 | -0.620097218 | 5.54E-06 | 0.00072392 |
| SOCS1 | -0.620452819 | 9.20E-07 | 0.000234542 |
| MYC | -0.625798878 | 1.27E-06 | 0.000282416 |
| FOSL1 | -0.662676718 | 8.52E-07 | 0.00023261 |
| ZC3H12A | -0.664377351 | 2.72E-08 | 3.01E-05 |
| IGFBP1 | -0.740349451 | 0.000286578 | 0.008032458 |
| JUNB | -0.753996594 | 3.18E-06 | 0.000502731 |
| FOS | -0.768143375 | 0.000142733 | 0.005089563 |
| EGR1 | -0.787553322 | 2.73E-06 | 0.000482149 |
| VIL1 | -0.82813308 | 7.59E-07 | 0.000218692 |
| IL6 | -0.830291181 | 3.89E-09 | 8.65E-06 |
| SLITRK3 | -0.83749118 | 5.19E-06 | 0.000690082 |
| FOSB | -1.316251504 | 5.56E-09 | 1.08E-05 |
