# Supplementary material for: Identification of Fatty acid metabolism-Related Genes in the Progression from Non-Alcoholic Fatty Liver to Nonalcoholic fatty liver disease
Source: Research Square preprint supplement (doi:10.21203/rs.3.rs-5030401/v1), 2024-10-21
Supplement: Supplementary file 5 [file 2ab641f40a6c55cd0af98429.docx]

| Machine learning | Genes |
| --- | --- |
| Random forest | ACOT12 ENO3 FMO1 DPEP3 |
| Least absolute shrinkage and selection operator | ACOT12 |
| FMO1 |
| PTGS2 |
| ME1 |
| PRKAA2 |
| DPEP3 |
| ALOX12B |
| CYP2C19 |
| TP53INP2 |
| ALAD |
| ACADL |
| ERP29 |
| ELOVL4 |
| LDHA |
| Support vector machine-recursive feature elimination | ACOT12 |
| ENO3 |
| FMO1 |
| ME1 |
| LDHA |
| RDH16 |
| CYP2C19 |
| GPD1 |
| PTGS2 |
| ELOVL4 |
| CA4 |
| DPEP3 |
| ADH5 |
| PRKAB2 |
| THRSP |
| ERP29 |
| ALAD |
| MAPKAPK2 |
| PRKAA2 |
| TP53INP2 |
| HPGD |
| AMACR |
|  |  |
| Weighted Co-Expression Network Analysis | Genes |
| black | AAAS |
| black | ABCA3 |
| black | ABCA9 |
| black | ABCC3 |
| black | ABCC6 |
| black | ABCG8 |
| black | ABHD15 |
| black | ABHD8 |
| black | ABI3 |
| black | ABTB2 |
| black | ACAD8 |
| black | ACBD4 |
| black | ACOT8 |
| black | ACP6 |
| black | ACSF2 |
| black | ACSF3 |
| black | ACSS2 |
| black | ACTR5 |
| black | ADA |
| black | ADAMTS1 |
| black | ADAMTS17 |
| black | ADCY7 |
| black | ADCY9 |
| black | ADRA2A |
| black | ADRA2B |
| black | ADRM1 |
| black | AEN |
| black | AGFG2 |
| black | AGPAT3 |
| black | AKR7A2 |
| black | AKR7A3 |
| black | AKT1S1 |
| black | ALAD |
| black | ALDH16A1 |
| black | ALDH1L1 |
| black | ALDOC |
| black | ALG1 |
| black | ALG12 |
| black | ALG3 |
| black | ALKBH2 |
| black | ALOX5AP |
| black | ANGEL1 |
| black | ANGPT2 |
| black | ANKH |
| black | ANKLE2 |
| black | ANKRD29 |
| black | ANKRD37 |
| black | ANKRD40 |
| black | ANKRD42 |
| black | ANKS6 |
| black | ANO1 |
| black | ANXA1 |
| black | ANXA2 |
| black | ANXA6 |
| black | ANXA9 |
| black | AOC3 |
| black | AP1S1 |
| black | AP2A2 |
| black | AP3M2 |
| black | APBA1 |
| black | APBA3 |
| black | APBB3 |
| black | APEH |
| black | APEX2 |
| black | APH1A |
| black | APOA5 |
| black | APOL5 |
| black | APRT |
| black | AQP11 |
| black | AQP3 |
| black | AR |
| black | ARAF |
| black | ARAP1 |
| black | ARF6 |
| black | ARG2 |
| black | ARHGAP26 |
| black | ARHGAP9 |
| black | ARHGDIA |
| black | ARHGEF16 |
| black | ARID3C |
| black | ARMC6 |
| black | ARMC7 |
| black | ARPC1B |
| black | ARRDC1 |
| black | ARSA |
| black | ARSD |
| black | ARSF |
| black | ARVCF |
| black | ASB13 |
| black | ASCL2 |
| black | ATAD3C |
| black | ATF5 |
| black | ATOH7 |
| black | ATP10D |
| black | ATP1B2 |
| black | ATP1B3 |
| black | ATP2B2 |
| black | ATP6AP1 |
| black | ATP6V0C |
| black | ATP6V0D1 |
| black | ATP6V0E2 |
| black | ATXN7L1 |
| black | AURKB |
| black | AXIN2 |
| black | AXL |
| black | B3GALT6 |
| black | B9D2 |
| black | BACE2 |
| black | BAD |
| black | BAIAP2L1 |
| black | BAK1 |
| black | BAP1 |
| black | BCL2L10 |
| black | BCL9 |
| black | BCL9L |
| black | BCORL1 |
| black | BET1L |
| black | BEX2 |
| black | BLOC1S1 |
| black | BLVRB |
| black | BMP6 |
| black | BOK |
| black | BOLA1 |
| black | BOP1 |
| black | BRD1 |
| black | BRF2 |
| black | BRIP1 |
| black | BSCL2 |
| black | BTBD2 |
| black | BTBD8 |
| black | BTC |
| black | C11orf24 |
| black | C11orf71 |
| black | C12orf57 |
| black | C12orf76 |
| black | C16orf70 |
| black | C19orf18 |
| black | C19orf33 |
| black | C1orf21 |
| black | C1orf53 |
| black | C20orf27 |
| black | C2orf88 |
| black | C4orf19 |
| black | C6orf47 |
| black | C8G |
| black | C8orf44 |
| black | CA14 |
| black | CABLES1 |
| black | CACNA1H |
| black | CALHM2 |
| black | CAMK1 |
| black | CAPN1 |
| black | CAPN2 |
| black | CARS2 |
| black | CASK |
| black | CBL |
| black | CBLC |
| black | CBLN3 |
| black | CBR1 |
| black | CBX4 |
| black | CBX7 |
| black | CC2D1A |
| black | CCDC106 |
| black | CCDC120 |
| black | CCDC124 |
| black | CCDC148 |
| black | CCDC158 |
| black | CCDC38 |
| black | CCDC51 |
| black | CCDC69 |
| black | CCDC77 |
| black | CCDC92 |
| black | CCL11 |
| black | CCL14 |
| black | CCNA2 |
| black | CCNB1 |
| black | CCNB2 |
| black | CCND3 |
| black | CCNJ |
| black | CCNT1 |
| black | CCS |
| black | CD151 |
| black | CD22 |
| black | CD36 |
| black | CD3D |
| black | CD48 |
| black | CD8A |
| black | CD96 |
| black | CDC20 |
| black | CDC34 |
| black | CDC42EP5 |
| black | CDC6 |
| black | CDK2AP2 |
| black | CDK5 |
| black | CENPP |
| black | CENPQ |
| black | CENPV |
| black | CERK |
| black | CFP |
| black | CH25H |
| black | CHAD |
| black | CHERP |
| black | CHIC1 |
| black | CHMP6 |
| black | CHRNB1 |
| black | CHST15 |
| black | CIZ1 |
| black | CKMT2 |
| black | CLC |
| black | CLDN2 |
| black | CLDN3 |
| black | CLEC14A |
| black | CLEC3B |
| black | CLIC5 |
| black | CLN3 |
| black | CLPTM1L |
| black | CLSTN2 |
| black | CMTM8 |
| black | CNP |
| black | CNTF |
| black | CNTFR |
| black | CNTROB |
| black | COBL |
| black | COL27A1 |
| black | COL4A1 |
| black | COL4A2 |
| black | COL5A1 |
| black | COMT |
| black | COPE |
| black | COPZ2 |
| black | COQ10A |
| black | COQ4 |
| black | COQ9 |
| black | CORO1A |
| black | COTL1 |
| black | COX6A2 |
| black | COX8A |
| black | CPA3 |
| black | CPB1 |
| black | CPNE2 |
| black | CPT1B |
| black | CRB3 |
| black | CREB5 |
| black | CRTC2 |
| black | CRY2 |
| black | CRYAA |
| black | CRYL1 |
| black | CTCFL |
| black | CTNNBIP1 |
| black | CTSA |
| black | CTSD |
| black | CTSF |
| black | CTSH |
| black | CUEDC1 |
| black | CUEDC2 |
| black | CX3CL1 |
| black | CYB561D2 |
| black | CYB5D2 |
| black | CYC1 |
| black | CYFIP2 |
| black | CYHR1 |
| black | CYP11A1 |
| black | CYP1A1 |
| black | CYP26A1 |
| black | CYP3A5 |
| black | CYP4A11 |
| black | CYP4A22 |
| black | CYTL1 |
| black | D2HGDH |
| black | DAAM2 |
| black | DAGLB |
| black | DAO |
| black | DAXX |
| black | DCAF15 |
| black | DCLRE1B |
| black | DCUN1D3 |
| black | DDAH2 |
| black | DDT |
| black | DDTL |
| black | DDX50 |
| black | DECR2 |
| black | DENR |
| black | DFFB |
| black | DGAT1 |
| black | DGAT2 |
| black | DGCR2 |
| black | DHCR24 |
| black | DHRS9 |
| black | DHTKD1 |
| black | DIO1 |
| black | DIP2C |
| black | DIRAS3 |
| black | DMRTA1 |
| black | DMXL2 |
| black | DNAJC27 |
| black | DNASE1L2 |
| black | DNMT3L |
| black | DNPEP |
| black | DPP9 |
| black | DTNB |
| black | DTWD2 |
| black | DUS1L |
| black | DUSP14 |
| black | DUSP19 |
| black | DUSP2 |
| black | DVL1 |
| black | DYRK4 |
| black | DYSF |
| black | E4F1 |
| black | EBP |
| black | EEFSEC |
| black | EFNA1 |
| black | EFNA2 |
| black | EFNA4 |
| black | EGFL7 |
| black | EGR2 |
| black | EHBP1L1 |
| black | EHD3 |
| black | EIF3C |
| black | ELFN1 |
| black | ELK1 |
| black | EMILIN1 |
| black | EMILIN2 |
| black | EML2 |
| black | EMP1 |
| black | EMP3 |
| black | ENHO |
| black | ENO3 |
| black | ENPP7 |
| black | ENTPD4 |
| black | EPHA1 |
| black | EPHB4 |
| black | EPS8L2 |
| black | ERBB2 |
| black | ERCC2 |
| black | ESCO2 |
| black | ESRP2 |
| black | ETHE1 |
| black | ETNK2 |
| black | ETV3 |
| black | ETV5 |
| black | EVI5L |
| black | EXOC6B |
| black | EXOSC4 |
| black | F13A1 |
| black | F8A2 |
| black | FAAH |
| black | FADS1 |
| black | FADS2 |
| black | FAM102A |
| black | FAM117A |
| black | FAM149A |
| black | FAM151A |
| black | FAM160A1 |
| black | FAM167B |
| black | FAM168A |
| black | FAM168B |
| black | FAM169B |
| black | FAM171B |
| black | FAM20C |
| black | FAM50B |
| black | FAM83D |
| black | FAM83F |
| black | FAM83G |
| black | FAP |
| black | FARP2 |
| black | FASN |
| black | FASTK |
| black | FBLN7 |
| black | FBXL15 |
| black | FBXL17 |
| black | FBXO2 |
| black | FBXW5 |
| black | FERMT3 |
| black | FGF2 |
| black | FGF23 |
| black | FGFRL1 |
| black | FIZ1 |
| black | FKBP8 |
| black | FLNA |
| black | FLVCR2 |
| black | FMO2 |
| black | FN3K |
| black | FNBP4 |
| black | FNDC5 |
| black | FNIP2 |
| black | FOLR2 |
| black | FOXA3 |
| black | FOXF1 |
| black | FOXK2 |
| black | FOXQ1 |
| black | FRAT1 |
| black | FXYD1 |
| black | FYCO1 |
| black | FZD5 |
| black | FZR1 |
| black | GAB1 |
| black | GADD45GIP1 |
| black | GALNS |
| black | GALT |
| black | GAPT |
| black | GAS6 |
| black | GATA4 |
| black | GBA |
| black | GBF1 |
| black | GCDH |
| black | GCGR |
| black | GDF2 |
| black | GEMIN4 |
| black | GEMIN8 |
| black | GFOD2 |
| black | GGT6 |
| black | GIGYF1 |
| black | GJA1 |
| black | GJA10 |
| black | GLB1 |
| black | GLI2 |
| black | GLOD5 |
| black | GLRB |
| black | GLS2 |
| black | GLTPD2 |
| black | GMDS |
| black | GNB2 |
| black | GNG5 |
| black | GNMT |
| black | GNPTG |
| black | GOLT1A |
| black | GORASP1 |
| black | GPAA1 |
| black | GPC1 |
| black | GPKOW |
| black | GPR141 |
| black | GPR146 |
| black | GPR52 |
| black | GPRC5A |
| black | GPRC5B |
| black | GPRC5C |
| black | GPT |
| black | GPX2 |
| black | GRAMD1A |
| black | GREM2 |
| black | GRINA |
| black | GRTP1 |
| black | GSDMB |
| black | GSS |
| black | GSTA5 |
| black | GSTT2 |
| black | GTF2H4 |
| black | GTF2IRD2B |
| black | GTPBP1 |
| black | GUK1 |
| black | HAAO |
| black | HAPLN4 |
| black | HAX1 |
| black | HBEGF |
| black | HCLS1 |
| black | HCN3 |
| black | HCST |
| black | HDAC11 |
| black | HDHD3 |
| black | HES6 |
| black | HEXIM2 |
| black | HHAT |
| black | HIF1AN |
| black | HIP1R |
| black | HLA-DMB |
| black | HLA-DPA1 |
| black | HLA-DPB1 |
| black | HLA-F |
| black | HLA-G |
| black | HMG20B |
| black | HMHB1 |
| black | HNF1A |
| black | HNF1B |
| black | HNF4A |
| black | HNRNPU |
| black | HOMER2 |
| black | HOXB2 |
| black | HOXB4 |
| black | HOXB5 |
| black | HPN |
| black | HS3ST3A1 |
| black | HS6ST1 |
| black | HSD11B2 |
| black | HSD17B10 |
| black | HSD17B14 |
| black | HSD17B3 |
| black | HSD3B1 |
| black | HSPA12B |
| black | HSPG2 |
| black | HYI |
| black | IAPP |
| black | ICAM3 |
| black | ID3 |
| black | IDH2 |
| black | IDUA |
| black | IER2 |
| black | IFI30 |
| black | IFT57 |
| black | IGFALS |
| black | IGSF8 |
| black | IGSF9 |
| black | IL18RAP |
| black | IL20RB |
| black | IL22RA1 |
| black | IL27 |
| black | IL2RA |
| black | IL2RB |
| black | IL34 |
| black | IL6R |
| black | IL7R |
| black | IMPA2 |
| black | INMT |
| black | INO80B |
| black | INSR |
| black | INTS1 |
| black | IP6K3 |
| black | IPO13 |
| black | IQSEC1 |
| black | IRF6 |
| black | IRS1 |
| black | ISCA2 |
| black | ISM1 |
| black | ITGAD |
| black | ITGB7 |
| black | ITPK1 |
| black | ITPR3 |
| black | JAK2 |
| black | JMJD7 |
| black | KANK2 |
| black | KCNJ10 |
| black | KCNJ3 |
| black | KCNK17 |
| black | KCNK5 |
| black | KCTD1 |
| black | KCTD11 |
| black | KCTD15 |
| black | KDELR1 |
| black | KHK |
| black | KIAA0100 |
| black | KIAA1522 |
| black | KIF12 |
| black | KIF1C |
| black | KIF22 |
| black | KIT |
| black | KLF13 |
| black | KLF15 |
| black | KLF16 |
| black | KLF3 |
| black | KPNA5 |
| black | KRBA2 |
| black | KRT23 |
| black | KRT8 |
| black | KRTAP5-2 |
| black | KRTAP5-4 |
| black | KRTAP9-4 |
| black | LAGE3 |
| black | LARP6 |
| black | LCA5L |
| black | LDHD |
| black | LETM1 |
| black | LGALS3BP |
| black | LGALS4 |
| black | LGR5 |
| black | LHX2 |
| black | LILRA5 |
| black | LIMD1 |
| black | LIMS2 |
| black | LIN7B |
| black | LMCD1 |
| black | LMF2 |
| black | LMLN |
| black | LMO2 |
| black | LPCAT1 |
| black | LPIN3 |
| black | LRAT |
| black | LRP5 |
| black | LRPAP1 |
| black | LRRC14 |
| black | LRRC20 |
| black | LRRC25 |
| black | LRRC3 |
| black | LRRC37A2 |
| black | LRRC41 |
| black | LRRC47 |
| black | LRRC6 |
| black | LRRC61 |
| black | LSM10 |
| black | LSM14B |
| black | LSR |
| black | LSS |
| black | LTBP2 |
| black | LTBP3 |
| black | LYG1 |
| black | LYPD6B |
| black | LZTS2 |
| black | MACC1 |
| black | MACROD1 |
| black | MAF1 |
| black | MAL |
| black | MAL2 |
| black | MALL |
| black | MAMDC4 |
| black | MAMLD1 |
| black | MAN1B1 |
| black | MAN1C1 |
| black | MAN2A2 |
| black | MAN2B1 |
| black | MAP3K11 |
| black | MAP3K12 |
| black | MAP7D1 |
| black | MAPK3 |
| black | MAZ |
| black | MBD3 |
| black | MBD6 |
| black | MBOAT4 |
| black | MBOAT7 |
| black | MBTD1 |
| black | MCM5 |
| black | MCTP2 |
| black | MDK |
| black | MEA1 |
| black | MECP2 |
| black | MED12 |
| black | MED13L |
| black | MED19 |
| black | MED25 |
| black | MED26 |
| black | MED9 |
| black | MEF2D |
| black | MEFV |
| black | MEPCE |
| black | MFSD3 |
| black | MGAT4B |
| black | MGLL |
| black | MID1IP1 |
| black | MIF |
| black | MIF4GD |
| black | MIIP |
| black | MINK1 |
| black | MKNK2 |
| black | MLST8 |
| black | MLYCD |
| black | MMP15 |
| black | MMRN1 |
| black | MMRN2 |
| black | MMS19 |
| black | MOGAT2 |
| black | MOGAT3 |
| black | MON1A |
| black | MORN4 |
| black | MOV10 |
| black | MPND |
| black | MPST |
| black | MPV17L |
| black | MRGPRF |
| black | MRPL2 |
| black | MRPL28 |
| black | MRPL51 |
| black | MRPS18A |
| black | MRPS2 |
| black | MRPS34 |
| black | MRPS7 |
| black | MSL1 |
| black | MTA1 |
| black | MUC1 |
| black | MUC20 |
| black | MVD |
| black | MVK |
| black | MYBL1 |
| black | MYH3 |
| black | MYL5 |
| black | MYL6B |
| black | MYO16 |
| black | MYOZ1 |
| black | MYRIP |
| black | NAAA |
| black | NAB2 |
| black | NADSYN1 |
| black | NAGS |
| black | NAIP |
| black | NAP1L2 |
| black | NAPA |
| black | NAT10 |
| black | NAT9 |
| black | NCF1 |
| black | NCLN |
| black | NDST1 |
| black | NDST2 |
| black | NDUFA11 |
| black | NDUFA7 |
| black | NDUFB11 |
| black | NDUFS7 |
| black | NEIL1 |
| black | NEU4 |
| black | NEXN |
| black | NFASC |
| black | NFIC |
| black | NGFR |
| black | NHLRC1 |
| black | NINJ2 |
| black | NINL |
| black | NNMT |
| black | NOP56 |
| black | NOTCH1 |
| black | NOTCH4 |
| black | NOTUM |
| black | NOVA2 |
| black | NPAS2 |
| black | NPFF |
| black | NPM1 |
| black | NPR1 |
| black | NPR2 |
| black | NQO1 |
| black | NQO2 |
| black | NR0B2 |
| black | NR1H2 |
| black | NR2F2 |
| black | NR2F6 |
| black | NR3C2 |
| black | NT5DC2 |
| black | NTHL1 |
| black | NUBP2 |
| black | NUDT14 |
| black | NUDT16L1 |
| black | NUDT4 |
| black | NUP210 |
| black | NUP214 |
| black | NUTF2 |
| black | NXF3 |
| black | OAZ3 |
| black | ODF3B |
| black | OGFOD2 |
| black | OGG1 |
| black | ONECUT2 |
| black | OR14I1 |
| black | OR2D2 |
| black | OR2T8 |
| black | OR4Q3 |
| black | OR51I2 |
| black | OR52K2 |
| black | OR56B1 |
| black | ORAI3 |
| black | OSGIN1 |
| black | OVCA2 |
| black | OVGP1 |
| black | OXER1 |
| black | OXT |
| black | P2RX4 |
| black | PACSIN3 |
| black | PANX2 |
| black | PAPOLG |
| black | PAQR7 |
| black | PARP12 |
| black | PARP16 |
| black | PARP6 |
| black | PARS2 |
| black | PATL1 |
| black | PBXIP1 |
| black | PCDH17 |
| black | PCDHB14 |
| black | PCGF1 |
| black | PCK2 |
| black | PCSK7 |
| black | PCSK9 |
| black | PCYT2 |
| black | PDCD2L |
| black | PDE2A |
| black | PDE4D |
| black | PDK2 |
| black | PDP2 |
| black | PDRG1 |
| black | PDZD4 |
| black | PEAR1 |
| black | PEG10 |
| black | PELP1 |
| black | PEPD |
| black | PER1 |
| black | PERP |
| black | PES1 |
| black | PEX11G |
| black | PEX14 |
| black | PEX5 |
| black | PEX6 |
| black | PFDN2 |
| black | PGPEP1 |
| black | PHACTR1 |
| black | PHF23 |
| black | PHYHD1 |
| black | PICK1 |
| black | PID1 |
| black | PIGQ |
| black | PIGV |
| black | PIK3CG |
| black | PINK1 |
| black | PITPNM1 |
| black | PKD2L1 |
| black | PKDCC |
| black | PKHD1 |
| black | PKLR |
| black | PLCB3 |
| black | PLCD1 |
| black | PLCG1 |
| black | PLD3 |
| black | PLD6 |
| black | PLEKHA6 |
| black | PLP2 |
| black | PLTP |
| black | PMAIP1 |
| black | PMVK |
| black | PNKD |
| black | PNKP |
| black | PNMA6A |
| black | PNPLA2 |
| black | PNPLA3 |
| black | POLD2 |
| black | POLD4 |
| black | POLDIP2 |
| black | POLG |
| black | POLM |
| black | POLR1A |
| black | POLR2I |
| black | POLR2L |
| black | POLR3E |
| black | POLRMT |
| black | PPARA |
| black | PPARGC1B |
| black | PPBP |
| black | PPIAL4G |
| black | PPIF |
| black | PPIL4 |
| black | PPL |
| black | PPM1L |
| black | PPP1R15B |
| black | PPP1R1A |
| black | PPP1R9B |
| black | PPP2R1A |
| black | PPP2R5D |
| black | PRAM1 |
| black | PRAMEF10 |
| black | PRAP1 |
| black | PRCC |
| black | PREB |
| black | PRELID1 |
| black | PRF1 |
| black | PRG2 |
| black | PRKACA |
| black | PRKD2 |
| black | PRMT6 |
| black | PROCR |
| black | PRODH |
| black | PRPS2 |
| black | PRR15L |
| black | PRRG2 |
| black | PRSS8 |
| black | PSENEN |
| black | PSKH1 |
| black | PSMD3 |
| black | PSMG3 |
| black | PTGES2 |
| black | PTPN18 |
| black | PTPN21 |
| black | PTPN9 |
| black | PTPRN2 |
| black | PTPRS |
| black | PTPRU |
| black | PTRH1 |
| black | PUSL1 |
| black | PXDN |
| black | PYGO2 |
| black | PYHIN1 |
| black | QSOX1 |
| black | RAB11FIP3 |
| black | RAB11FIP4 |
| black | RAB13 |
| black | RAB26 |
| black | RAC2 |
| black | RAD54L2 |
| black | RAG1 |
| black | RAMP2 |
| black | RANBP10 |
| black | RANGRF |
| black | RAPGEFL1 |
| black | RASA2 |
| black | RASGEF1A |
| black | RASL10B |
| black | RASSF3 |
| black | RBM28 |
| black | RBM33 |
| black | RBP5 |
| black | RCC1 |
| black | REEP4 |
| black | REEP6 |
| black | REPIN1 |
| black | RER1 |
| black | RFNG |
| black | RFPL1 |
| black | RGPD1 |
| black | RGS19 |
| black | RGS7BP |
| black | RHBG |
| black | RHCE |
| black | RHOJ |
| black | RILP |
| black | RIMKLB |
| black | RNF10 |
| black | RNF133 |
| black | RNF144A |
| black | RNF167 |
| black | RNF19B |
| black | RNF208 |
| black | RNF44 |
| black | RNH1 |
| black | RNPEPL1 |
| black | ROBO3 |
| black | ROBO4 |
| black | RORC |
| black | RPA4 |
| black | RPAP1 |
| black | RPL7L1 |
| black | RPRML |
| black | RRAGD |
| black | RRP1B |
| black | RSAD1 |
| black | RTN4RL2 |
| black | RUSC2 |
| black | SAMD1 |
| black | SAMD4A |
| black | SAP30L |
| black | SARDH |
| black | SASH3 |
| black | SATB1 |
| black | SCAMP2 |
| black | SCAP |
| black | SCD |
| black | SCN4A |
| black | SCN8A |
| black | SCRN2 |
| black | SCYL1 |
| black | SDC1 |
| black | SDC3 |
| black | SDR39U1 |
| black | SEC14L2 |
| black | SEC14L3 |
| black | SEC14L4 |
| black | SEC16A |
| black | SEMA4C |
| black | SEMA4D |
| black | SEMA4G |
| black | SERF1B |
| black | SERHL2 |
| black | SERINC2 |
| black | SF1 |
| black | SF3A1 |
| black | SF3A2 |
| black | SFRP5 |
| black | SFT2D3 |
| black | SFXN5 |
| black | SGSM3 |
| black | SH2B3 |
| black | SH3RF2 |
| black | SHARPIN |
| black | SHF |
| black | SIGLEC1 |
| black | SIGMAR1 |
| black | SIPA1L1 |
| black | SIPA1L3 |
| black | SIRT4 |
| black | SIX2 |
| black | SKAP1 |
| black | SLC12A1 |
| black | SLC12A4 |
| black | SLC12A8 |
| black | SLC15A3 |
| black | SLC16A10 |
| black | SLC16A2 |
| black | SLC16A9 |
| black | SLC19A1 |
| black | SLC22A1 |
| black | SLC22A5 |
| black | SLC22A7 |
| black | SLC23A1 |
| black | SLC23A3 |
| black | SLC24A3 |
| black | SLC25A1 |
| black | SLC25A10 |
| black | SLC25A11 |
| black | SLC25A12 |
| black | SLC25A18 |
| black | SLC25A21 |
| black | SLC25A22 |
| black | SLC25A23 |
| black | SLC25A27 |
| black | SLC25A37 |
| black | SLC25A42 |
| black | SLC25A43 |
| black | SLC27A3 |
| black | SLC27A5 |
| black | SLC28A1 |
| black | SLC29A1 |
| black | SLC2A10 |
| black | SLC2A14 |
| black | SLC2A3 |
| black | SLC2A4RG |
| black | SLC38A10 |
| black | SLC38A11 |
| black | SLC38A3 |
| black | SLC39A5 |
| black | SLC41A1 |
| black | SLC43A1 |
| black | SLC46A1 |
| black | SLC4A2 |
| black | SLC5A9 |
| black | SLC6A1 |
| black | SLC6A12 |
| black | SLC6A13 |
| black | SLC9A3R1 |
| black | SLC9A3R2 |
| black | SLCO2B1 |
| black | SLFN12 |
| black | SLITRK3 |
| black | SMAD6 |
| black | SMAD7 |
| black | SMAD9 |
| black | SMARCA4 |
| black | SMARCD2 |
| black | SMG5 |
| black | SMG6 |
| black | SMO |
| black | SMOC1 |
| black | SMPD1 |
| black | SNAP47 |
| black | SNF8 |
| black | SNN |
| black | SNORA22 |
| black | SNORA2A |
| black | SNORA2B |
| black | SNORA46 |
| black | SNORA65 |
| black | SNORD8 |
| black | SNRNP25 |
| black | SNTA1 |
| black | SNX12 |
| black | SOX13 |
| black | SOX9 |
| black | SPATA18 |
| black | SPATA20 |
| black | SPATA2L |
| black | SPDYC |
| black | SPHK2 |
| black | SPI1 |
| black | SPNS1 |
| black | SPNS2 |
| black | SPR |
| black | SPRED2 |
| black | SPRYD3 |
| black | SPTBN2 |
| black | SREBF1 |
| black | SREBF2 |
| black | SRRD |
| black | SS18L1 |
| black | SSBP4 |
| black | SSH1 |
| black | SSNA1 |
| black | SSRP1 |
| black | SSTR1 |
| black | ST3GAL1 |
| black | ST3GAL4 |
| black | STAB1 |
| black | STAG3 |
| black | STAMBPL1 |
| black | STAP2 |
| black | STARD10 |
| black | STARD3 |
| black | STAT4 |
| black | STAT5A |
| black | STK11 |
| black | STK16 |
| black | STK25 |
| black | STOML1 |
| black | STON2 |
| black | STS |
| black | STUB1 |
| black | STX4 |
| black | SURF2 |
| black | SUSD2 |
| black | SUSD4 |
| black | SYDE1 |
| black | SYPL2 |
| black | SYT7 |
| black | SYVN1 |
| black | TAF6L |
| black | TAF8 |
| black | TAP2 |
| black | TAPBP |
| black | TAS2R14 |
| black | TAS2R19 |
| black | TAS2R31 |
| black | TAS2R41 |
| black | TBC1D10B |
| black | TBC1D13 |
| black | TBC1D14 |
| black | TBC1D16 |
| black | TBC1D2 |
| black | TBL2 |
| black | TBL3 |
| black | TBX19 |
| black | TBX2 |
| black | TBX3 |
| black | TCEA2 |
| black | TCEAL7 |
| black | TCF3 |
| black | TCTA |
| black | TCTN1 |
| black | TDGF1 |
| black | TEAD3 |
| black | TESK2 |
| black | TFE3 |
| black | THAP10 |
| black | THNSL2 |
| black | THY1 |
| black | TIE1 |
| black | TIGD5 |
| black | TIMM13 |
| black | TJAP1 |
| black | TKT |
| black | TM4SF1 |
| black | TM6SF2 |
| black | TM7SF2 |
| black | TMBIM1 |
| black | TMC8 |
| black | TMCC2 |
| black | TMCO3 |
| black | TMED6 |
| black | TMEM129 |
| black | TMEM147 |
| black | TMEM159 |
| black | TMEM175 |
| black | TMEM177 |
| black | TMEM18 |
| black | TMEM200A |
| black | TMEM204 |
| black | TMEM222 |
| black | TMEM25 |
| black | TMEM30B |
| black | TMEM37 |
| black | TMEM42 |
| black | TMEM44 |
| black | TMEM52 |
| black | TMEM53 |
| black | TMEM63A |
| black | TMEM64 |
| black | TMEM71 |
| black | TMEM80 |
| black | TMEM82 |
| black | TMEM86A |
| black | TMEM86B |
| black | TMEM9 |
| black | TMEM98 |
| black | TMOD1 |
| black | TMPRSS6 |
| black | TNF |
| black | TNFSF14 |
| black | TNFSF4 |
| black | TNIK |
| black | TNIP1 |
| black | TNS1 |
| black | TOB2 |
| black | TOLLIP |
| black | TOMM6 |
| black | TOP1MT |
| black | TOR3A |
| black | TP53I13 |
| black | TP53I3 |
| black | TPCN2 |
| black | TPPP2 |
| black | TRA2A |
| black | TRAF7 |
| black | TRAP1 |
| black | TRAPPC6A |
| black | TREH |
| black | TREM1 |
| black | TRIB3 |
| black | TRIM16L |
| black | TRIM25 |
| black | TRIM27 |
| black | TRIM44 |
| black | TRIM47 |
| black | TRIM66 |
| black | TRIP6 |
| black | TRPV4 |
| black | TRRAP |
| black | TSC22D4 |
| black | TSKU |
| black | TSPAN1 |
| black | TSPAN14 |
| black | TSPAN15 |
| black | TSPAN17 |
| black | TSPAN33 |
| black | TSPYL5 |
| black | TTC21B |
| black | TTC31 |
| black | TTC7B |
| black | TTL |
| black | TUBA1B |
| black | TUBA4A |
| black | TUBB3 |
| black | TUSC3 |
| black | TXN2 |
| black | TYMP |
| black | UBAC2 |
| black | UBASH3B |
| black | UBE2R2 |
| black | UBXN6 |
| black | UCHL1 |
| black | UCK1 |
| black | UCP2 |
| black | UGT2A2 |
| black | UGT3A2 |
| black | ULK3 |
| black | UMPS |
| black | UNC13B |
| black | UNC5CL |
| black | UNC93B1 |
| black | UPF1 |
| black | UROC1 |
| black | UROS |
| black | USP49 |
| black | USP50 |
| black | USP51 |
| black | VAPB |
| black | VASN |
| black | VAT1 |
| black | VAV2 |
| black | VCAN |
| black | VENTX |
| black | VGLL4 |
| black | VOPP1 |
| black | WASF3 |
| black | WDR24 |
| black | WDR27 |
| black | WDR74 |
| black | WDR77 |
| black | WDR81 |
| black | WDR91 |
| black | WFS1 |
| black | WNT11 |
| black | WNT2 |
| black | WSB2 |
| black | XPNPEP2 |
| black | XYLT2 |
| black | YIF1B |
| black | YIPF2 |
| black | YLPM1 |
| black | YPEL1 |
| black | YPEL3 |
| black | ZBED3 |
| black | ZBTB10 |
| black | ZBTB22 |
| black | ZBTB39 |
| black | ZBTB42 |
| black | ZBTB45 |
| black | ZBTB7B |
| black | ZDHHC1 |
| black | ZDHHC18 |
| black | ZDHHC23 |
| black | ZFAND2B |
| black | ZFAND3 |
| black | ZFPL1 |
| black | ZFPM1 |
| black | ZFYVE19 |
| black | ZGPAT |
| black | ZHX2 |
| black | ZKSCAN5 |
| black | ZNF100 |
| black | ZNF121 |
| black | ZNF165 |
| black | ZNF185 |
| black | ZNF266 |
| black | ZNF273 |
| black | ZNF275 |
| black | ZNF286A |
| black | ZNF320 |
| black | ZNF324 |
| black | ZNF346 |
| black | ZNF362 |
| black | ZNF414 |
| black | ZNF415 |
| black | ZNF417 |
| black | ZNF430 |
| black | ZNF449 |
| black | ZNF471 |
| black | ZNF485 |
| black | ZNF493 |
| black | ZNF512B |
| black | ZNF546 |
| black | ZNF569 |
| black | ZNF598 |
| black | ZNF625 |
| black | ZNF641 |
| black | ZNF652 |
| black | ZNF662 |
| black | ZNF664 |
| black | ZNF672 |
| black | ZNF676 |
| black | ZNF687 |
| black | ZNF704 |
| black | ZNF747 |
| black | ZNF765 |
| black | ZNF777 |
| black | ZNF787 |
| black | ZNF813 |
| black | ZNF836 |
| black | ZNF837 |
| black | ZNF841 |
| black | ZNF844 |
| black | ZYX |
| cyan | ABCE1 |
| cyan | ABCG5 |
| cyan | ABLIM3 |
| cyan | ADCY1 |
| cyan | AMD1 |
| cyan | APBB1IP |
| cyan | APLNR |
| cyan | APOF |
| cyan | ARAP2 |
| cyan | ARFGAP3 |
| cyan | ARL5B |
| cyan | AVPR1A |
| cyan | BAG3 |
| cyan | BAZ1A |
| cyan | BCAT2 |
| cyan | BIRC3 |
| cyan | BLNK |
| cyan | C17orf58 |
| cyan | C1orf210 |
| cyan | C3orf33 |
| cyan | C9orf72 |
| cyan | CALML3 |
| cyan | CAPN12 |
| cyan | CASP4 |
| cyan | CCDC59 |
| cyan | CCDC68 |
| cyan | CCT6A |
| cyan | CD38 |
| cyan | CD59 |
| cyan | CDA |
| cyan | CEBPA |
| cyan | CHAF1A |
| cyan | CHD1 |
| cyan | CHORDC1 |
| cyan | CKAP2L |
| cyan | COL4A5 |
| cyan | CPN1 |
| cyan | CRP |
| cyan | CSAD |
| cyan | CTSG |
| cyan | CXCR1 |
| cyan | CYCS |
| cyan | CYP1B1 |
| cyan | DDIT3 |
| cyan | DDX21 |
| cyan | DDX55 |
| cyan | DENND4A |
| cyan | DHODH |
| cyan | DHX8 |
| cyan | DNAJB1 |
| cyan | DNAJB9 |
| cyan | DNAJC17 |
| cyan | DNAJC2 |
| cyan | DUSP6 |
| cyan | EDAR |
| cyan | EDEM3 |
| cyan | EEF1E1 |
| cyan | EIF2AK3 |
| cyan | EIF4A1 |
| cyan | EIF5 |
| cyan | ENTPD7 |
| cyan | EPB41L1 |
| cyan | ERI1 |
| cyan | ERP44 |
| cyan | ESPN |
| cyan | ETS2 |
| cyan | EXT1 |
| cyan | F3 |
| cyan | FAM110B |
| cyan | FAM124B |
| cyan | FAM3C |
| cyan | FGL1 |
| cyan | FKBP5 |
| cyan | FPR1 |
| cyan | FPR2 |
| cyan | FRMD6 |
| cyan | FUNDC2 |
| cyan | G0S2 |
| cyan | GATA6 |
| cyan | GCA |
| cyan | GCK |
| cyan | GFPT1 |
| cyan | GLB1L |
| cyan | GLCCI1 |
| cyan | GNL3 |
| cyan | GPATCH4 |
| cyan | GPX7 |
| cyan | GRAP |
| cyan | GSPT1 |
| cyan | GSTO2 |
| cyan | GUCA2B |
| cyan | GZF1 |
| cyan | GZMH |
| cyan | HELB |
| cyan | HERPUD1 |
| cyan | HEY2 |
| cyan | HIVEP1 |
| cyan | HNRNPF |
| cyan | HOOK2 |
| cyan | HPS5 |
| cyan | HSPA13 |
| cyan | HSPA1A |
| cyan | HSPA1B |
| cyan | HSPA5 |
| cyan | HSPH1 |
| cyan | IL1R1 |
| cyan | IL1RN |
| cyan | ILDR1 |
| cyan | IRAK3 |
| cyan | IRAK4 |
| cyan | ITGAL |
| cyan | IVNS1ABP |
| cyan | JOSD1 |
| cyan | KANK4 |
| cyan | KCNK6 |
| cyan | KIAA0895 |
| cyan | KLHDC7A |
| cyan | KLHDC8B |
| cyan | KLHL18 |
| cyan | LBP |
| cyan | LMNB1 |
| cyan | LRG1 |
| cyan | LRRC59 |
| cyan | LRRC8B |
| cyan | LSG1 |
| cyan | LYSMD3 |
| cyan | MAK16 |
| cyan | MAP3K5 |
| cyan | MARVELD3 |
| cyan | MB |
| cyan | MBNL2 |
| cyan | MIS12 |
| cyan | MLKL |
| cyan | MOCS3 |
| cyan | MPL |
| cyan | MRTO4 |
| cyan | MTHFD2L |
| cyan | MTRR |
| cyan | MYOM1 |
| cyan | MYPOP |
| cyan | NAMPT |
| cyan | NANS |
| cyan | NCAPG |
| cyan | NCOA7 |
| cyan | NEU3 |
| cyan | NFKBIZ |
| cyan | NIP7 |
| cyan | NKG7 |
| cyan | NLRC3 |
| cyan | NLRP11 |
| cyan | NOL8 |
| cyan | NOLC1 |
| cyan | NOP14 |
| cyan | NOP16 |
| cyan | NOP2 |
| cyan | NOP58 |
| cyan | NPC1L1 |
| cyan | NT5C2 |
| cyan | NUDT10 |
| cyan | NUS1 |
| cyan | OLFM2 |
| cyan | ONECUT1 |
| cyan | OSMR |
| cyan | P4HA1 |
| cyan | PBX1 |
| cyan | PDGFRB |
| cyan | PGM2 |
| cyan | PGM3 |
| cyan | PIGW |
| cyan | PIK3R2 |
| cyan | PITPNM2 |
| cyan | PLA2G2A |
| cyan | PLA2G4C |
| cyan | PLEKHG6 |
| cyan | PLEKHH3 |
| cyan | PLOD2 |
| cyan | PLSCR1 |
| cyan | PNO1 |
| cyan | PNPLA8 |
| cyan | POLR1B |
| cyan | PPDPF |
| cyan | PRMT5 |
| cyan | PSTPIP2 |
| cyan | PTPN2 |
| cyan | PTRH2 |
| cyan | RAB20 |
| cyan | RAB27A |
| cyan | RALGPS1 |
| cyan | RAP1B |
| cyan | RIC8B |
| cyan | RNASEH1 |
| cyan | RND3 |
| cyan | RNF4 |
| cyan | RPF2 |
| cyan | RPGR |
| cyan | RRP15 |
| cyan | RRS1 |
| cyan | RSL24D1 |
| cyan | S100A12 |
| cyan | S100A8 |
| cyan | S100A9 |
| cyan | SAA1 |
| cyan | SAA2 |
| cyan | SAMSN1 |
| cyan | SEC23B |
| cyan | SEL1L |
| cyan | SELL |
| cyan | SERP1 |
| cyan | SERPINB1 |
| cyan | SERPINB8 |
| cyan | SESN2 |
| cyan | SETX |
| cyan | SGK2 |
| cyan | SGMS2 |
| cyan | SH3BP2 |
| cyan | SHD |
| cyan | SIRPA |
| cyan | SLC16A13 |
| cyan | SLC16A7 |
| cyan | SLC25A32 |
| cyan | SLC25A34 |
| cyan | SLC28A2 |
| cyan | SLC33A1 |
| cyan | SLC38A1 |
| cyan | SLC38A2 |
| cyan | SLC45A3 |
| cyan | SNAP25 |
| cyan | SNORA33 |
| cyan | SOD2 |
| cyan | SORCS2 |
| cyan | SRFBP1 |
| cyan | SRGN |
| cyan | SS18 |
| cyan | STAT3 |
| cyan | STEAP4 |
| cyan | STIP1 |
| cyan | STK17A |
| cyan | TBC1D24 |
| cyan | THADA |
| cyan | TIFA |
| cyan | TK1 |
| cyan | TLR2 |
| cyan | TMEM139 |
| cyan | TMEM39A |
| cyan | TMEM92 |
| cyan | TNFRSF1A |
| cyan | TPST1 |
| cyan | TRMT11 |
| cyan | TTC39B |
| cyan | TXNL4A |
| cyan | UTP15 |
| cyan | UTP3 |
| cyan | VNN2 |
| cyan | WDR75 |
| cyan | YAP1 |
| cyan | YRDC |
| cyan | ZER1 |
| cyan | ZNF460 |
| greenyellow | ABI3BP |
| greenyellow | ACTA2 |
| greenyellow | ADAMTS5 |
| greenyellow | ADAMTS9 |
| greenyellow | ADAMTSL2 |
| greenyellow | AEBP1 |
| greenyellow | AFF3 |
| greenyellow | AMOT |
| greenyellow | ANGPTL2 |
| greenyellow | ANK2 |
| greenyellow | ANTXR1 |
| greenyellow | ANXA3 |
| greenyellow | APOD |
| greenyellow | AQP1 |
| greenyellow | ATP8A1 |
| greenyellow | B3GALNT1 |
| greenyellow | BICC1 |
| greenyellow | C1orf198 |
| greenyellow | C7 |
| greenyellow | CACNA2D1 |
| greenyellow | CCDC102B |
| greenyellow | CCDC146 |
| greenyellow | CCDC3 |
| greenyellow | CCDC80 |
| greenyellow | CCL19 |
| greenyellow | CCL21 |
| greenyellow | CCND2 |
| greenyellow | CD1E |
| greenyellow | CD24 |
| greenyellow | CDH11 |
| greenyellow | CDH13 |
| greenyellow | CDH6 |
| greenyellow | CFTR |
| greenyellow | CHRDL1 |
| greenyellow | CHST4 |
| greenyellow | CLDN11 |
| greenyellow | CNDP1 |
| greenyellow | COL14A1 |
| greenyellow | COL1A1 |
| greenyellow | COL1A2 |
| greenyellow | COL3A1 |
| greenyellow | COL6A3 |
| greenyellow | CRIM1 |
| greenyellow | CRIP2 |
| greenyellow | CRYAB |
| greenyellow | CSGALNACT1 |
| greenyellow | DCDC2 |
| greenyellow | DCN |
| greenyellow | DPT |
| greenyellow | DSEL |
| greenyellow | DTNA |
| greenyellow | EDNRA |
| greenyellow | EFEMP1 |
| greenyellow | EHF |
| greenyellow | ELOVL7 |
| greenyellow | ENO2 |
| greenyellow | ENPP5 |
| greenyellow | EPCAM |
| greenyellow | EPHA3 |
| greenyellow | FBLN1 |
| greenyellow | FBLN5 |
| greenyellow | FBN1 |
| greenyellow | FCER1A |
| greenyellow | FLRT2 |
| greenyellow | FNDC1 |
| greenyellow | FRZB |
| greenyellow | GEM |
| greenyellow | GPC3 |
| greenyellow | GPC4 |
| greenyellow | GPR171 |
| greenyellow | GSN |
| greenyellow | GULP1 |
| greenyellow | HEPH |
| greenyellow | IGFBP5 |
| greenyellow | IGSF10 |
| greenyellow | IKZF1 |
| greenyellow | INPP4B |
| greenyellow | ITGBL1 |
| greenyellow | JAG1 |
| greenyellow | KCNA3 |
| greenyellow | KCNJ16 |
| greenyellow | KRT7 |
| greenyellow | LAMB1 |
| greenyellow | LAMC3 |
| greenyellow | LBH |
| greenyellow | LOX |
| greenyellow | LPAR1 |
| greenyellow | LPL |
| greenyellow | LRRC7 |
| greenyellow | LUM |
| greenyellow | MAMDC2 |
| greenyellow | MFAP4 |
| greenyellow | MFGE8 |
| greenyellow | MGAT4C |
| greenyellow | MGP |
| greenyellow | MOXD1 |
| greenyellow | MSRB3 |
| greenyellow | MTHFD2 |
| greenyellow | MYOF |
| greenyellow | NPNT |
| greenyellow | NPR3 |
| greenyellow | NTRK2 |
| greenyellow | OGN |
| greenyellow | OPHN1 |
| greenyellow | PAMR1 |
| greenyellow | PARM1 |
| greenyellow | PCDH18 |
| greenyellow | PDE3A |
| greenyellow | PDGFD |
| greenyellow | PDGFRA |
| greenyellow | PDPN |
| greenyellow | PLA2G5 |
| greenyellow | PLA2R1 |
| greenyellow | PLCE1 |
| greenyellow | PLCXD3 |
| greenyellow | PLEKHH2 |
| greenyellow | PLN |
| greenyellow | PMP22 |
| greenyellow | PODN |
| greenyellow | PRICKLE1 |
| greenyellow | PROM1 |
| greenyellow | PTGDS |
| greenyellow | PTGIS |
| greenyellow | PVALB |
| greenyellow | RASL11B |
| greenyellow | RASSF9 |
| greenyellow | RBMS3 |
| greenyellow | RCAN2 |
| greenyellow | RERG |
| greenyellow | RNASE1 |
| greenyellow | RNF150 |
| greenyellow | SCN7A |
| greenyellow | SCRN1 |
| greenyellow | SEMA3C |
| greenyellow | SEMA3D |
| greenyellow | SLC3A2 |
| greenyellow | SLC5A1 |
| greenyellow | SLIT2 |
| greenyellow | SMOC2 |
| greenyellow | SPARCL1 |
| greenyellow | SPP1 |
| greenyellow | SRPX |
| greenyellow | SSPN |
| greenyellow | STMN2 |
| greenyellow | SULF1 |
| greenyellow | SVEP1 |
| greenyellow | SYT11 |
| greenyellow | TANC1 |
| greenyellow | TGFB2 |
| greenyellow | THBS2 |
| greenyellow | TRPC1 |
| greenyellow | TUBA1A |
| greenyellow | VLDLR |
| greenyellow | VTCN1 |
| greenyellow | ZNF521 |
| greenyellow | ZNF532 |
| grey | ACOT1 |
| grey | ACTA1 |
| grey | AKR1B10 |
| grey | ALPK2 |
| grey | ANKRD1 |
| grey | ANO5 |
| grey | ARL3 |
| grey | ARRDC4 |
| grey | ASCL1 |
| grey | BAG1 |
| grey | BCAT1 |
| grey | BEX5 |
| grey | BPY2B |
| grey | CA3 |
| grey | CAMP |
| grey | CAP2 |
| grey | CAPN13 |
| grey | CD209 |
| grey | CD300LF |
| grey | CD52 |
| grey | CD80 |
| grey | CENPK |
| grey | CES3 |
| grey | CHL1 |
| grey | CHRM3 |
| grey | CLDN14 |
| grey | CLEC12A |
| grey | CMYA5 |
| grey | COL6A6 |
| grey | CPE |
| grey | CRISP3 |
| grey | CSDC2 |
| grey | CXCL13 |
| grey | CXCR6 |
| grey | CYP1A2 |
| grey | CYP2B6 |
| grey | CYP2C19 |
| grey | CYP4F12 |
| grey | CYTH4 |
| grey | DAGLA |
| grey | DCPS |
| grey | DDX3Y |
| grey | DHRS2 |
| grey | DHX33 |
| grey | DLG2 |
| grey | DNAH6 |
| grey | DOCK5 |
| grey | DPPA4 |
| grey | DPYSL4 |
| grey | EIF1AY |
| grey | EPB41L4A |
| grey | EPHA4 |
| grey | ESPL1 |
| grey | ETV1 |
| grey | EXOC3 |
| grey | F2RL1 |
| grey | FAM184A |
| grey | FANCE |
| grey | FCAMR |
| grey | FCRL3 |
| grey | FGF21 |
| grey | FLRT3 |
| grey | FREM2 |
| grey | GPR88 |
| grey | GRM8 |
| grey | GSTM1 |
| grey | GSTM2 |
| grey | GSTM3 |
| grey | GSTM4 |
| grey | GSTT1 |
| grey | GZMB |
| grey | HAMP |
| grey | HBD |
| grey | HKDC1 |
| grey | HLA-C |
| grey | HLA-DQA1 |
| grey | HLA-DRB1 |
| grey | HLA-DRB3 |
| grey | HLA-DRB5 |
| grey | ID1 |
| grey | ITLN1 |
| grey | KCNJ2 |
| grey | KCNMA1 |
| grey | KCNS3 |
| grey | KIF4A |
| grey | KL |
| grey | LAMP3 |
| grey | LCE3B |
| grey | LDHC |
| grey | LGALS9 |
| grey | LILRA2 |
| grey | LINGO4 |
| grey | LOXL4 |
| grey | MBD4 |
| grey | MCM2 |
| grey | METTL7B |
| grey | MKX |
| grey | MYH1 |
| grey | MYH7 |
| grey | MYL1 |
| grey | MYL2 |
| grey | MYLPF |
| grey | MYOM2 |
| grey | MYOT |
| grey | N4BP1 |
| grey | NEB |
| grey | NEDD4L |
| grey | NEK10 |
| grey | NFKBIE |
| grey | NLGN4Y |
| grey | NPBWR1 |
| grey | NR1D1 |
| grey | OLR1 |
| grey | OR14A16 |
| grey | PADI1 |
| grey | PCOLCE2 |
| grey | PEG3 |
| grey | PELI2 |
| grey | PLD5 |
| grey | PLEK2 |
| grey | PRAMEF4 |
| grey | PRELID2 |
| grey | PROZ |
| grey | PRSS35 |
| grey | PTPRH |
| grey | RAD52 |
| grey | RASEF |
| grey | RIMBP2 |
| grey | RND2 |
| grey | RPS23 |
| grey | RPS4Y1 |
| grey | RTN4RL1 |
| grey | SAMD5 |
| grey | SCUBE1 |
| grey | SERPINE1 |
| grey | SIGLEC14 |
| grey | SLC17A8 |
| grey | SLC22A3 |
| grey | SLC3A1 |
| grey | SLC44A3 |
| grey | SLC5A12 |
| grey | SLCO1A2 |
| grey | SNAI2 |
| grey | SNORA75 |
| grey | SOX18 |
| grey | SOX6 |
| grey | SPINK1 |
| grey | SPIRE1 |
| grey | ST8SIA6 |
| grey | STARD5 |
| grey | SULF2 |
| grey | SYT9 |
| grey | TAS2R60 |
| grey | TBL1Y |
| grey | TECTB |
| grey | TFF3 |
| grey | TMC4 |
| grey | TMEM107 |
| grey | TMEM88 |
| grey | TMSB4Y |
| grey | TMTC1 |
| grey | TNC |
| grey | TNMD |
| grey | TRIM31 |
| grey | TRIM9 |
| grey | TRIP10 |
| grey | TSPAN13 |
| grey | UFSP1 |
| grey | USP9Y |
| grey | UTY |
| grey | WIPF3 |
| grey | ZFY |
| grey | ZNF385D |
| grey | ZNF683 |
| grey | ZNF7 |
| lightcyan | AACS |
| lightcyan | AAK1 |
| lightcyan | ACSM1 |
| lightcyan | ADCK5 |
| lightcyan | ADCY10 |
| lightcyan | ADM2 |
| lightcyan | ALDH3A1 |
| lightcyan | AMDHD2 |
| lightcyan | ARFRP1 |
| lightcyan | B4GALNT4 |
| lightcyan | C11orf52 |
| lightcyan | C11orf68 |
| lightcyan | C19orf25 |
| lightcyan | C1QTNF7 |
| lightcyan | C1orf216 |
| lightcyan | C1orf35 |
| lightcyan | C1orf74 |
| lightcyan | C2orf27A |
| lightcyan | C3orf18 |
| lightcyan | CARD9 |
| lightcyan | CBX8 |
| lightcyan | CCDC121 |
| lightcyan | CCNF |
| lightcyan | CD247 |
| lightcyan | CD7 |
| lightcyan | CDH15 |
| lightcyan | CHCHD6 |
| lightcyan | CLDND2 |
| lightcyan | COL10A1 |
| lightcyan | COL21A1 |
| lightcyan | COL9A3 |
| lightcyan | CTHRC1 |
| lightcyan | DBNDD1 |
| lightcyan | DBNDD2 |
| lightcyan | DEF6 |
| lightcyan | DLEU7 |
| lightcyan | DTD1 |
| lightcyan | EEF1A2 |
| lightcyan | ELMO3 |
| lightcyan | ESPNL |
| lightcyan | ETV2 |
| lightcyan | FAM3B |
| lightcyan | FAM53A |
| lightcyan | FCGBP |
| lightcyan | FCHO1 |
| lightcyan | FOXD2 |
| lightcyan | FZD1 |
| lightcyan | GOLM1 |
| lightcyan | IFI27L1 |
| lightcyan | IGSF3 |
| lightcyan | IL1A |
| lightcyan | IQCC |
| lightcyan | ITGB6 |
| lightcyan | ITPKA |
| lightcyan | KRT19 |
| lightcyan | LGALS2 |
| lightcyan | LGALS3 |
| lightcyan | LRRC45 |
| lightcyan | LTB |
| lightcyan | LYL1 |
| lightcyan | MDP1 |
| lightcyan | MESP1 |
| lightcyan | MORC2 |
| lightcyan | NAP1L5 |
| lightcyan | NEK2 |
| lightcyan | NOL3 |
| lightcyan | NOXA1 |
| lightcyan | NPM2 |
| lightcyan | PAFAH1B3 |
| lightcyan | PAQR4 |
| lightcyan | PARD6A |
| lightcyan | PDE6D |
| lightcyan | PDE6G |
| lightcyan | PDE7B |
| lightcyan | PDGFA |
| lightcyan | PLLP |
| lightcyan | PPP1R10 |
| lightcyan | PTPRCAP |
| lightcyan | RAMP3 |
| lightcyan | RET |
| lightcyan | RGS5 |
| lightcyan | RNF2 |
| lightcyan | SAC3D1 |
| lightcyan | SEMA3G |
| lightcyan | SERGEF |
| lightcyan | SLC1A7 |
| lightcyan | SLC22A11 |
| lightcyan | SLC22A18AS |
| lightcyan | SNAPC2 |
| lightcyan | SP5 |
| lightcyan | SPINT2 |
| lightcyan | SPRY4 |
| lightcyan | TACC3 |
| lightcyan | TBX10 |
| lightcyan | TCAP |
| lightcyan | TFF2 |
| lightcyan | TMEM54 |
| lightcyan | TNFRSF4 |
| lightcyan | TSEN54 |
| lightcyan | TTLL5 |
| lightcyan | UCN |
| lightcyan | VPS37D |
| lightcyan | WFDC1 |
| lightcyan | WNT4 |
| lightcyan | YBX2 |
| lightcyan | ZDBF2 |
| lightcyan | ZDHHC24 |
| lightcyan | ZNF597 |
| lightcyan | ZNF784 |
| lightcyan | ZNF805 |
| lightcyan | ZNF821 |
| pink | A4GALT |
| pink | ADM |
| pink | AGPAT2 |
| pink | AKAP12 |
| pink | ALDH1B1 |
| pink | AMACR |
| pink | AMDHD1 |
| pink | ANGPTL4 |
| pink | ANKRD22 |
| pink | APOLD1 |
| pink | ARID5B |
| pink | ARL4D |
| pink | ARNTL |
| pink | ATF3 |
| pink | BACH2 |
| pink | BCAR3 |
| pink | BCL2A1 |
| pink | BCL6 |
| pink | BMP2 |
| pink | BTG2 |
| pink | BTNL9 |
| pink | C2CD4A |
| pink | C3orf52 |
| pink | CALCA |
| pink | CCL2 |
| pink | CCL20 |
| pink | CD69 |
| pink | CD9 |
| pink | CDC42EP3 |
| pink | CDC7 |
| pink | CDH1 |
| pink | CDH19 |
| pink | CEBPD |
| pink | CHAC1 |
| pink | CHI3L1 |
| pink | CHRNA10 |
| pink | CLEC1A |
| pink | CLEC4E |
| pink | CLECL1 |
| pink | CNTNAP2 |
| pink | CPEB4 |
| pink | CRISPLD2 |
| pink | CRY1 |
| pink | CSF3R |
| pink | CSRNP3 |
| pink | CXCL1 |
| pink | CXCL2 |
| pink | CXCL5 |
| pink | CXCL6 |
| pink | CXCR4 |
| pink | CYP27B1 |
| pink | CYTIP |
| pink | DBP |
| pink | DDIT4 |
| pink | DUSP1 |
| pink | DUSP10 |
| pink | EGR1 |
| pink | EGR3 |
| pink | ELOVL6 |
| pink | EPO |
| pink | ERN1 |
| pink | FAM131A |
| pink | FAM174B |
| pink | FAM9B |
| pink | FBXO27 |
| pink | FGFR2 |
| pink | FILIP1L |
| pink | FMO1 |
| pink | FOLR3 |
| pink | FOS |
| pink | FOSB |
| pink | FOSL2 |
| pink | FOXO1 |
| pink | FST |
| pink | G6PC |
| pink | GADD45B |
| pink | GADD45G |
| pink | GMNN |
| pink | GPAM |
| pink | GPD1 |
| pink | GPR183 |
| pink | HAL |
| pink | HAS2 |
| pink | HES5 |
| pink | HHEX |
| pink | HORMAD2 |
| pink | IER5L |
| pink | IGFBP1 |
| pink | IL10 |
| pink | IL1RL1 |
| pink | INHBA |
| pink | INHBB |
| pink | INHBE |
| pink | INSIG1 |
| pink | IRAK1BP1 |
| pink | IRS2 |
| pink | ITPRIP |
| pink | JUN |
| pink | JUNB |
| pink | KCNE4 |
| pink | KCNK1 |
| pink | KLF11 |
| pink | KLF4 |
| pink | KLF6 |
| pink | KLHL15 |
| pink | KLHL25 |
| pink | KRT80 |
| pink | LCN2 |
| pink | LDLR |
| pink | LIF |
| pink | LONRF3 |
| pink | LYVE1 |
| pink | MAF |
| pink | MAP1LC3B |
| pink | MAP3K8 |
| pink | MAPK4 |
| pink | MICB |
| pink | MIDN |
| pink | MLF1 |
| pink | MMACHC |
| pink | MTMR4 |
| pink | MXRA5 |
| pink | MYBPH |
| pink | MYC |
| pink | NAT8 |
| pink | NAT8B |
| pink | NDC80 |
| pink | NDRG1 |
| pink | NEDD9 |
| pink | NFIL3 |
| pink | NHEJ1 |
| pink | NPTX2 |
| pink | NR1D2 |
| pink | NR4A1 |
| pink | NR4A2 |
| pink | NR4A3 |
| pink | NUPR1 |
| pink | NXT1 |
| pink | OSBPL11 |
| pink | PCDH20 |
| pink | PCK1 |
| pink | PELI1 |
| pink | PER3 |
| pink | PFKFB3 |
| pink | PHLDA1 |
| pink | PIM1 |
| pink | PLEKHA7 |
| pink | PLEKHF1 |
| pink | PMS2 |
| pink | PNRC1 |
| pink | PPARGC1A |
| pink | PPP1R15A |
| pink | PPP1R3B |
| pink | PPP1R3C |
| pink | PRKAB1 |
| pink | PRKCE |
| pink | PTGS2 |
| pink | RASD1 |
| pink | RASGEF1B |
| pink | RASL10A |
| pink | RBPMS |
| pink | RCL1 |
| pink | RELB |
| pink | RGS1 |
| pink | RGS2 |
| pink | RHOB |
| pink | RIN1 |
| pink | RND1 |
| pink | RNF152 |
| pink | RNF175 |
| pink | RNF43 |
| pink | ROM1 |
| pink | RTP3 |
| pink | RUNX1 |
| pink | S100P |
| pink | SDC4 |
| pink | SEC14L1 |
| pink | SERPINB9 |
| pink | SGK1 |
| pink | SIK1 |
| pink | SIPA1L2 |
| pink | SLA |
| pink | SLC17A4 |
| pink | SLC1A3 |
| pink | SLC23A2 |
| pink | SLC25A25 |
| pink | SLC30A10 |
| pink | SLC7A2 |
| pink | SLITRK2 |
| pink | SOCS1 |
| pink | SOCS2 |
| pink | SPHK1 |
| pink | STK17B |
| pink | SYTL3 |
| pink | TBX15 |
| pink | TEAD4 |
| pink | TEF |
| pink | TGFB3 |
| pink | TGFBR3 |
| pink | THBS1 |
| pink | THRSP |
| pink | TIPARP |
| pink | TLN2 |
| pink | TMCC3 |
| pink | TMEM100 |
| pink | TMEM169 |
| pink | TMPRSS2 |
| pink | TNFAIP3 |
| pink | TNFAIP6 |
| pink | TSC22D2 |
| pink | TSHZ3 |
| pink | USP2 |
| pink | VEGFA |
| pink | WNT3 |
| pink | WNT5A |
| pink | YPEL2 |
| pink | ZDHHC19 |
| pink | ZFAND5 |
| pink | ZFP36 |
| pink | ZKSCAN3 |
| pink | ZNF367 |
| purple | ABCG2 |
| purple | ACVR2B |
| purple | ADAL |
| purple | ADAMTS4 |
| purple | ADRB2 |
| purple | AHNAK2 |
| purple | AKTIP |
| purple | ALDH1A3 |
| purple | ANKRD55 |
| purple | ANKS4B |
| purple | APOBEC3A |
| purple | ARHGAP10 |
| purple | ARHGEF5 |
| purple | ARID4A |
| purple | ARL14 |
| purple | ASB1 |
| purple | ATAD3B |
| purple | ATF7IP2 |
| purple | B3GAT3 |
| purple | B3GNT5 |
| purple | B4GALT1 |
| purple | B4GALT3 |
| purple | B4GALT5 |
| purple | BATF3 |
| purple | BCAR1 |
| purple | BCL3 |
| purple | BCL6B |
| purple | BDH2 |
| purple | BEX1 |
| purple | BLID |
| purple | BYSL |
| purple | C17orf75 |
| purple | C2CD4B |
| purple | C5AR1 |
| purple | CAMSAP1 |
| purple | CAND2 |
| purple | CCDC150 |
| purple | CCDC9 |
| purple | CCL3 |
| purple | CCL3L3 |
| purple | CCNL2 |
| purple | CD244 |
| purple | CD274 |
| purple | CD276 |
| purple | CD2BP2 |
| purple | CDC42EP1 |
| purple | CDKAL1 |
| purple | CHPF2 |
| purple | CHRD |
| purple | CHRDL2 |
| purple | CHSY3 |
| purple | CIT |
| purple | CLEC4D |
| purple | CLEC5A |
| purple | CMTM2 |
| purple | CNTLN |
| purple | CPEB2 |
| purple | CREB3L3 |
| purple | CRIP1 |
| purple | CSTA |
| purple | CYP21A2 |
| purple | CYP7A1 |
| purple | DDO |
| purple | DDX28 |
| purple | DHRS13 |
| purple | DNAH5 |
| purple | DTX1 |
| purple | E2F3 |
| purple | E2F4 |
| purple | EDC4 |
| purple | EEF2K |
| purple | EHD4 |
| purple | ELF3 |
| purple | ELL |
| purple | EPHA2 |
| purple | ETV7 |
| purple | FAHD1 |
| purple | FAM107A |
| purple | FAM110C |
| purple | FAM13A |
| purple | FAM20A |
| purple | FAM43A |
| purple | FAM89A |
| purple | FARSA |
| purple | FCN1 |
| purple | FIGN |
| purple | FJX1 |
| purple | FNBP1L |
| purple | FNDC4 |
| purple | FOSL1 |
| purple | FOXP2 |
| purple | FPGT |
| purple | FRK |
| purple | FRMD8 |
| purple | FSTL3 |
| purple | GDI1 |
| purple | GIN1 |
| purple | GRAMD4 |
| purple | GRHL1 |
| purple | GRWD1 |
| purple | H6PD |
| purple | HDAC4 |
| purple | HDC |
| purple | HMOX1 |
| purple | HS3ST3B1 |
| purple | HTR2B |
| purple | HYAL2 |
| purple | ICAM1 |
| purple | IER3 |
| purple | IER5 |
| purple | IFFO2 |
| purple | IGFBP2 |
| purple | IL15RA |
| purple | IL4R |
| purple | IL6 |
| purple | IPO4 |
| purple | IRAK2 |
| purple | IRF1 |
| purple | IRF4 |
| purple | ISG20 |
| purple | ITGB3 |
| purple | JAKMIP2 |
| purple | KAT2A |
| purple | KBTBD3 |
| purple | KBTBD8 |
| purple | KDM6B |
| purple | KIAA0040 |
| purple | KLHL21 |
| purple | KLHL3 |
| purple | KLRG1 |
| purple | KRTCAP3 |
| purple | LAMA4 |
| purple | LENG9 |
| purple | LILRB2 |
| purple | LIMK2 |
| purple | LMNA |
| purple | LRIG1 |
| purple | LRP10 |
| purple | LRRC31 |
| purple | LRRN3 |
| purple | MAFF |
| purple | MAFK |
| purple | MAK |
| purple | MAP3K14 |
| purple | METRNL |
| purple | MEX3C |
| purple | MLXIP |
| purple | MMAB |
| purple | MMP25 |
| purple | MOGAT1 |
| purple | MREG |
| purple | MT1A |
| purple | MT1B |
| purple | MT1F |
| purple | MT1H |
| purple | MT1M |
| purple | MTA2 |
| purple | MYADM |
| purple | MYBBP1A |
| purple | NCOA5 |
| purple | NDST3 |
| purple | NFE2 |
| purple | NOC2L |
| purple | NOL4 |
| purple | OSM |
| purple | PADI4 |
| purple | PAK1 |
| purple | PALMD |
| purple | PANX1 |
| purple | PDZD8 |
| purple | PGS1 |
| purple | PHC2 |
| purple | PIM2 |
| purple | PIM3 |
| purple | PINX1 |
| purple | PKD2 |
| purple | PKIB |
| purple | PLEKHA4 |
| purple | PLXNA1 |
| purple | PMM2 |
| purple | PNMA1 |
| purple | PPRC1 |
| purple | PROK2 |
| purple | PSTK |
| purple | PTGDR |
| purple | PTGFRN |
| purple | PTX3 |
| purple | PVR |
| purple | PWP2 |
| purple | QSOX2 |
| purple | RAB15 |
| purple | RAB35 |
| purple | RAB43 |
| purple | RABGAP1 |
| purple | RALGDS |
| purple | RAP1GAP |
| purple | RAPH1 |
| purple | RASGRP3 |
| purple | RASL11A |
| purple | RBM15B |
| purple | RBM38 |
| purple | RBM43 |
| purple | RELA |
| purple | REXO1 |
| purple | RGS14 |
| purple | RHOD |
| purple | RIPK4 |
| purple | RPRD1B |
| purple | RRP1 |
| purple | RRP12 |
| purple | RRP9 |
| purple | S100A6 |
| purple | SALL1 |
| purple | SBNO2 |
| purple | SCG5 |
| purple | SEMA4B |
| purple | SERTAD1 |
| purple | SETD1A |
| purple | SHROOM1 |
| purple | SLC11A1 |
| purple | SLC16A3 |
| purple | SLC17A9 |
| purple | SLC1A4 |
| purple | SLC22A25 |
| purple | SLC22A4 |
| purple | SLC2A12 |
| purple | SLC35C1 |
| purple | SLC5A6 |
| purple | SLC7A1 |
| purple | SLCO4A1 |
| purple | SMARCAL1 |
| purple | SMYD5 |
| purple | SNIP1 |
| purple | SNX33 |
| purple | SOCS3 |
| purple | SOX7 |
| purple | SPRN |
| purple | SPSB1 |
| purple | SRF |
| purple | SRM |
| purple | SRPX2 |
| purple | STC1 |
| purple | STC2 |
| purple | STX11 |
| purple | STX3 |
| purple | SYT12 |
| purple | TAP1 |
| purple | TCF7L1 |
| purple | TEAD2 |
| purple | TFAP4 |
| purple | TGIF2 |
| purple | TGM2 |
| purple | THBD |
| purple | THPO |
| purple | TIGD2 |
| purple | TLR3 |
| purple | TMEM171 |
| purple | TMEM185B |
| purple | TNFAIP8L3 |
| purple | TNFRSF10D |
| purple | TNFRSF12A |
| purple | TNIP2 |
| purple | TNIP3 |
| purple | TNKS1BP1 |
| purple | TOMM40 |
| purple | TOP2A |
| purple | TRAF3IP3 |
| purple | TRAM2 |
| purple | TRHDE |
| purple | TRIM15 |
| purple | TRMT1 |
| purple | TRMT61A |
| purple | TRPM4 |
| purple | TSPYL2 |
| purple | TSSC4 |
| purple | TUBB6 |
| purple | UBE2Q1 |
| purple | UBE2T |
| purple | UCK2 |
| purple | UGT2B11 |
| purple | URB2 |
| purple | USP43 |
| purple | VIL1 |
| purple | VPS41 |
| purple | VPS45 |
| purple | VWA1 |
| purple | WWC1 |
| purple | ZC3H12A |
| purple | ZC3H3 |
| purple | ZCCHC24 |
| purple | ZCCHC3 |
| purple | ZFHX4 |
| purple | ZFP14 |
| purple | ZFYVE27 |
| purple | ZNF276 |
| purple | ZNF30 |
| purple | ZNF385B |
| purple | ZNF44 |
| purple | ZNF441 |
| purple | ZNF446 |
| purple | ZNF584 |
| purple | ZNF605 |
| purple | ZNF616 |
| purple | ZNF680 |
| purple | ZNF692 |
| red | ABCA12 |
| red | ABCC11 |
| red | ABCC8 |
| red | ABCG4 |
| red | ABHD12B |
| red | ABO |
| red | ACBD6 |
| red | ACCSL |
| red | ACOXL |
| red | ACP5 |
| red | ACSBG2 |
| red | ACTBL2 |
| red | ACTN2 |
| red | ACTRT2 |
| red | ACY3 |
| red | ADAM11 |
| red | ADAM30 |
| red | ADAMTS20 |
| red | ADAMTSL3 |
| red | ADARB2 |
| red | ADCYAP1 |
| red | ADIG |
| red | ADIPOQ |
| red | ADORA3 |
| red | ADPGK |
| red | ADRB1 |
| red | ADRB3 |
| red | ADSL |
| red | AGBL4 |
| red | AHRR |
| red | AIPL1 |
| red | AIRE |
| red | AKR1C1 |
| red | ALDH3B2 |
| red | ALOX12B |
| red | ALPP |
| red | ALX4 |
| red | AMELX |
| red | AMIGO1 |
| red | AMIGO3 |
| red | AMTN |
| red | ANGPT4 |
| red | ANGPTL5 |
| red | ANKRD30A |
| red | ANKRD45 |
| red | ANO3 |
| red | ANP32C |
| red | AP1M2 |
| red | APC2 |
| red | APCDD1L |
| red | APIP |
| red | APOBEC1 |
| red | APOBEC3H |
| red | APOBEC4 |
| red | ARGFX |
| red | ARHGEF9 |
| red | ARL4C |
| red | ARMC3 |
| red | ARX |
| red | ASB18 |
| red | ASB5 |
| red | ASH1L |
| red | ASPHD2 |
| red | ASTE1 |
| red | ATCAY |
| red | ATG9B |
| red | ATP1A2 |
| red | ATP2A1 |
| red | ATP6V1B1 |
| red | ATP8B3 |
| red | AURKC |
| red | AZU1 |
| red | B3GALT1 |
| red | BARHL1 |
| red | BBS2 |
| red | BEND6 |
| red | BEST2 |
| red | BEST3 |
| red | BEST4 |
| red | BRSK1 |
| red | BRSK2 |
| red | BST1 |
| red | BTN1A1 |
| red | BUB1 |
| red | C10orf90 |
| red | C10orf99 |
| red | C11orf40 |
| red | C12orf50 |
| red | C14orf178 |
| red | C15orf40 |
| red | C16orf71 |
| red | C17orf50 |
| red | C19orf44 |
| red | C1QL4 |
| red | C1orf100 |
| red | C1orf158 |
| red | C1orf189 |
| red | C1orf94 |
| red | C21orf58 |
| red | C2orf66 |
| red | C3orf20 |
| red | C3orf36 |
| red | C4orf17 |
| red | C4orf36 |
| red | C4orf45 |
| red | C4orf50 |
| red | C5orf60 |
| red | C6orf120 |
| red | C6orf15 |
| red | C6orf58 |
| red | C7orf33 |
| red | C7orf61 |
| red | C7orf66 |
| red | C9orf153 |
| red | CA9 |
| red | CABP2 |
| red | CABP5 |
| red | CACNG1 |
| red | CACNG2 |
| red | CACNG3 |
| red | CACNG6 |
| red | CACNG7 |
| red | CADPS |
| red | CALB1 |
| red | CALML5 |
| red | CALY |
| red | CAMK2A |
| red | CAMK2N2 |
| red | CAPG |
| red | CAPN11 |
| red | CAPN9 |
| red | CAPZA3 |
| red | CARTPT |
| red | CASP14 |
| red | CASS4 |
| red | CBLN4 |
| red | CCDC102A |
| red | CCDC112 |
| red | CCDC116 |
| red | CCDC144A |
| red | CCDC144NL |
| red | CCDC15 |
| red | CCDC57 |
| red | CCDC62 |
| red | CCDC73 |
| red | CCDC8 |
| red | CCL18 |
| red | CCL24 |
| red | CCL25 |
| red | CCL26 |
| red | CCNA1 |
| red | CCNO |
| red | CCT8L2 |
| red | CD109 |
| red | CD180 |
| red | CD19 |
| red | CD1A |
| red | CD2 |
| red | CD207 |
| red | CD300C |
| red | CD3G |
| red | CD4 |
| red | CD68 |
| red | CD70 |
| red | CD99 |
| red | CDC20B |
| red | CDCA2 |
| red | CDCA7 |
| red | CDH10 |
| red | CDH12 |
| red | CDH16 |
| red | CDH18 |
| red | CDH4 |
| red | CDH8 |
| red | CDKL1 |
| red | CDKL2 |
| red | CDT1 |
| red | CEACAM20 |
| red | CEACAM6 |
| red | CEACAM7 |
| red | CEBPE |
| red | CEL |
| red | CELSR3 |
| red | CHAF1B |
| red | CHIT1 |
| red | CHRM5 |
| red | CHST10 |
| red | CHST3 |
| red | CHST6 |
| red | CIB3 |
| red | CINP |
| red | CKAP4 |
| red | CLCA2 |
| red | CLCA4 |
| red | CLCNKA |
| red | CLDN19 |
| red | CLPS |
| red | CLRN2 |
| red | CLVS2 |
| red | CMTM4 |
| red | CNGA2 |
| red | CNGA4 |
| red | CNGB1 |
| red | CNPY1 |
| red | COL24A1 |
| red | COX6B2 |
| red | COX7B2 |
| red | CPA4 |
| red | CPLX3 |
| red | CPT1C |
| red | CREG2 |
| red | CRIP3 |
| red | CRYBA1 |
| red | CRYBB2 |
| red | CRYGA |
| red | CRYGB |
| red | CSMD1 |
| red | CSN2 |
| red | CSN3 |
| red | CSRP3 |
| red | CST7 |
| red | CSTL1 |
| red | CTAGE1 |
| red | CTNND2 |
| red | CXCL11 |
| red | CYP24A1 |
| red | CYP2F1 |
| red | CYP4Z2P |
| red | CYS1 |
| red | DACH2 |
| red | DACT3 |
| red | DAND5 |
| red | DAOA |
| red | DAPL1 |
| red | DAZL |
| red | DCBLD1 |
| red | DCC |
| red | DCDC1 |
| red | DCT |
| red | DDIT4L |
| red | DDX49 |
| red | DEFB104B |
| red | DEFB106B |
| red | DEFB113 |
| red | DEFB115 |
| red | DEFB118 |
| red | DEFB125 |
| red | DEFB126 |
| red | DEFB129 |
| red | DEFB132 |
| red | DHDH |
| red | DHRS7C |
| red | DIO2 |
| red | DMAP1 |
| red | DMRT3 |
| red | DNAI2 |
| red | DNAJB7 |
| red | DNAJC14 |
| red | DNAJC5G |
| red | DPEP3 |
| red | DPF2 |
| red | DPPA2 |
| red | DPPA3 |
| red | DPPA5 |
| red | DPRX |
| red | DQX1 |
| red | DRD4 |
| red | DRD5 |
| red | DTX2 |
| red | DUSP21 |
| red | DUSP26 |
| red | DUSP8 |
| red | DUX3 |
| red | DUX4 |
| red | DUXA |
| red | DYDC1 |
| red | DYDC2 |
| red | DYNC1I1 |
| red | EBF2 |
| red | EDN3 |
| red | EFNA5 |
| red | EGLN3 |
| red | EID2B |
| red | ELANE |
| red | ELAVL2 |
| red | ELK3 |
| red | ELOVL1 |
| red | ELSPBP1 |
| red | EMB |
| red | ENAH |
| red | ENPP6 |
| red | EPB42 |
| red | EPHB6 |
| red | ERC2 |
| red | ERCC6L |
| red | ESRRB |
| red | ETV3L |
| red | EVPL |
| red | F2 |
| red | FA2H |
| red | FAAH2 |
| red | FABP4 |
| red | FABP6 |
| red | FAIM2 |
| red | FAM102B |
| red | FAM153A |
| red | FAM153B |
| red | FAM155B |
| red | FAM163A |
| red | FAM170A |
| red | FAM178B |
| red | FAM181A |
| red | FAM181B |
| red | FAM184B |
| red | FAM187B |
| red | FAM24A |
| red | FAM25C |
| red | FAM3D |
| red | FAM47E |
| red | FAM71A |
| red | FAM71B |
| red | FAM71F1 |
| red | FAM83A |
| red | FAM83E |
| red | FAM8A1 |
| red | FAM90A1 |
| red | FAT4 |
| red | FBN2 |
| red | FBP2 |
| red | FBXO24 |
| red | FBXW10 |
| red | FBXW9 |
| red | FEV |
| red | FFAR2 |
| red | FGF14 |
| red | FGF20 |
| red | FGF5 |
| red | FGF7 |
| red | FGF9 |
| red | FKBP1B |
| red | FLJ42627 |
| red | FLYWCH2 |
| red | FNDC7 |
| red | FOLR1 |
| red | FOXC2 |
| red | FOXI2 |
| red | FOXN4 |
| red | FOXR2 |
| red | FRMPD1 |
| red | FSCN3 |
| red | FSIP2 |
| red | FTO |
| red | FTSJ3 |
| red | FUT3 |
| red | FUT5 |
| red | GABBR2 |
| red | GABRA2 |
| red | GABRA3 |
| red | GABRB1 |
| red | GABRD |
| red | GABRG3 |
| red | GABRR1 |
| red | GABRR2 |
| red | GAD2 |
| red | GADL1 |
| red | GAL3ST1 |
| red | GAL3ST3 |
| red | GALNT3 |
| red | GALNTL6 |
| red | GANAB |
| red | GAP43 |
| red | GAS1 |
| red | GCM1 |
| red | GCNT3 |
| red | GDAP1 |
| red | GDAP1L1 |
| red | GDF3 |
| red | GDF5 |
| red | GDPD4 |
| red | GFAP |
| red | GFI1B |
| red | GFRA2 |
| red | GFRA3 |
| red | GFRAL |
| red | GGN |
| red | GHRH |
| red | GHSR |
| red | GINS4 |
| red | GIP |
| red | GJD3 |
| red | GLB1L2 |
| red | GLDN |
| red | GLI1 |
| red | GLRA2 |
| red | GLT1D1 |
| red | GML |
| red | GNA14 |
| red | GNAT1 |
| red | GNB3 |
| red | GNRH1 |
| red | GPC5 |
| red | GPR119 |
| red | GPR139 |
| red | GPR142 |
| red | GPR148 |
| red | GPR149 |
| red | GPR152 |
| red | GPR173 |
| red | GPR179 |
| red | GPR25 |
| red | GPR27 |
| red | GPR3 |
| red | GPR32 |
| red | GPR6 |
| red | GPR61 |
| red | GPR63 |
| red | GPRC6A |
| red | GPRIN3 |
| red | GPX5 |
| red | GRIK4 |
| red | GRIP2 |
| red | GRK7 |
| red | GRM3 |
| red | GRM4 |
| red | GRM7 |
| red | GRP |
| red | GSG1L |
| red | GSTA3 |
| red | GTSF1 |
| red | GUCY2C |
| red | GYPE |
| red | GZMM |
| red | HAND1 |
| red | HAND2 |
| red | HAPLN3 |
| red | HAUS5 |
| red | HAVCR1 |
| red | HBE1 |
| red | HBQ1 |
| red | HCN4 |
| red | HEATR4 |
| red | HEMGN |
| red | HES2 |
| red | HFE |
| red | HIPK4 |
| red | HLA-DQB1 |
| red | HMCN1 |
| red | HOXA13 |
| red | HOXB1 |
| red | HOXD13 |
| red | HPDL |
| red | HRCT1 |
| red | HRK |
| red | HS3ST6 |
| red | HS6ST3 |
| red | HTR3B |
| red | HTR3C |
| red | HUNK |
| red | HYDIN |
| red | IDI2 |
| red | IFNA14 |
| red | IFNA16 |
| red | IFNA21 |
| red | IFNB1 |
| red | IFT52 |
| red | IGF2BP2 |
| red | IGF2BP3 |
| red | IGFL1 |
| red | IGFL3 |
| red | IGFL4 |
| red | IGSF22 |
| red | IL17D |
| red | IL17F |
| red | IL17REL |
| red | IL1F10 |
| red | IL1RL2 |
| red | IL20 |
| red | IL2RG |
| red | IL9R |
| red | INA |
| red | INO80D |
| red | INPP5J |
| red | INSL3 |
| red | INSM2 |
| red | IRGC |
| red | IRGQ |
| red | IRX2 |
| red | IRX3 |
| red | ISM2 |
| red | ITIH3 |
| red | ITPA |
| red | KCNA1 |
| red | KCNA10 |
| red | KCNB2 |
| red | KCNC2 |
| red | KCNE3 |
| red | KCNG2 |
| red | KCNG4 |
| red | KCNH3 |
| red | KCNH5 |
| red | KCNH6 |
| red | KCNJ12 |
| red | KCNJ14 |
| red | KCNJ6 |
| red | KCNK13 |
| red | KCTD16 |
| red | KCTD8 |
| red | KEL |
| red | KIF15 |
| red | KIF17 |
| red | KIF2A |
| red | KIF2B |
| red | KIF7 |
| red | KIR3DL2 |
| red | KIR3DL3 |
| red | KISS1 |
| red | KLF17 |
| red | KLHDC7B |
| red | KLK13 |
| red | KLK14 |
| red | KLK2 |
| red | KLK3 |
| red | KLK4 |
| red | KLK6 |
| red | KLK7 |
| red | KLRG2 |
| red | KPRP |
| red | KRT12 |
| red | KRT13 |
| red | KRT15 |
| red | KRT16 |
| red | KRT20 |
| red | KRT24 |
| red | KRT28 |
| red | KRT33A |
| red | KRT33B |
| red | KRT4 |
| red | KRT6A |
| red | KRT71 |
| red | KRT72 |
| red | KRT74 |
| red | KRT85 |
| red | KRTAP1-3 |
| red | KRTAP10-10 |
| red | KRTAP10-3 |
| red | KRTAP10-4 |
| red | KRTAP10-7 |
| red | KRTAP10-8 |
| red | KRTAP10-9 |
| red | KRTAP11-1 |
| red | KRTAP13-1 |
| red | KRTAP17-1 |
| red | KRTAP20-1 |
| red | KRTAP20-3 |
| red | KRTAP3-2 |
| red | KRTAP4-12 |
| red | KRTAP4-4 |
| red | KRTAP5-3 |
| red | KRTAP5-7 |
| red | KRTAP5-9 |
| red | KRTAP6-2 |
| red | KRTAP6-3 |
| red | KRTAP8-1 |
| red | LALBA |
| red | LAMA1 |
| red | LAMP1 |
| red | LANCL3 |
| red | LARS2 |
| red | LCE1C |
| red | LCE5A |
| red | LEMD1 |
| red | LEP |
| red | LHCGR |
| red | LHFPL5 |
| red | LHX5 |
| red | LHX8 |
| red | LILRA1 |
| red | LIN28B |
| red | LINGO2 |
| red | LIX1 |
| red | LMX1B |
| red | LOC401589 |
| red | LOXL2 |
| red | LPO |
| red | LPXN |
| red | LRCH2 |
| red | LRFN2 |
| red | LRFN5 |
| red | LRIT1 |
| red | LRP2 |
| red | LRP2BP |
| red | LRRC29 |
| red | LRRN4 |
| red | LRRTM2 |
| red | LTBP1 |
| red | LUZP1 |
| red | LUZP2 |
| red | LY6G6D |
| red | LYG2 |
| red | MADCAM1 |
| red | MAGEA10 |
| red | MAP1LC3C |
| red | MAP3K13 |
| red | MAP6D1 |
| red | MAPRE2 |
| red | MAPT |
| red | MAS1 |
| red | MAST4 |
| red | MATN4 |
| red | MBD5 |
| red | MC2R |
| red | MC3R |
| red | MCCD1 |
| red | MDH1B |
| red | MECR |
| red | MED12L |
| red | MEGF11 |
| red | MEMO1 |
| red | METRN |
| red | METTL8 |
| red | MFSD11 |
| red | MICA |
| red | MIOX |
| red | MIXL1 |
| red | MMP10 |
| red | MMP26 |
| red | MMP8 |
| red | MPP2 |
| red | MPPED2 |
| red | MRGPRX3 |
| red | MRGPRX4 |
| red | MS4A12 |
| red | MS4A5 |
| red | MSH4 |
| red | MST1R |
| red | MSTN |
| red | MTBP |
| red | MTMR10 |
| red | MUC13 |
| red | MUC17 |
| red | MUC21 |
| red | MUCL1 |
| red | MXRA8 |
| red | MYBPC2 |
| red | MYBPHL |
| red | MYEOV |
| red | MYL3 |
| red | MYO18B |
| red | MYO1D |
| red | MYOM3 |
| red | MYOZ3 |
| red | MYPN |
| red | N4BP3 |
| red | NAF1 |
| red | NALCN |
| red | NANOS2 |
| red | NCAPD3 |
| red | NCR1 |
| red | NDST4 |
| red | NECAB1 |
| red | NELL1 |
| red | NEUROG2 |
| red | NEUROG3 |
| red | NHLH1 |
| red | NKX2-1 |
| red | NKX2-2 |
| red | NKX2-5 |
| red | NLGN1 |
| red | NLGN3 |
| red | NLRP2 |
| red | NLRP4 |
| red | NLRP5 |
| red | NLRP7 |
| red | NLRP8 |
| red | NLRP9 |
| red | NMBR |
| red | NME5 |
| red | NMNAT3 |
| red | NMUR2 |
| red | NOG |
| red | NOS1 |
| red | NOTCH2 |
| red | NOX1 |
| red | NPDC1 |
| red | NPFFR1 |
| red | NPHS1 |
| red | NPTX1 |
| red | NPTXR |
| red | NPW |
| red | NR2E3 |
| red | NTF4 |
| red | NTM |
| red | NTN5 |
| red | NTS |
| red | NUDT11 |
| red | NUP210L |
| red | NWD1 |
| red | NXPH1 |
| red | NYX |
| red | OCA2 |
| red | ODAM |
| red | ODF3 |
| red | ODF3L1 |
| red | ODF4 |
| red | OMG |
| red | OPN1SW |
| red | OPTC |
| red | OR10A3 |
| red | OR10A4 |
| red | OR10A6 |
| red | OR10G8 |
| red | OR10H1 |
| red | OR10H2 |
| red | OR10H5 |
| red | OR10J5 |
| red | OR10K2 |
| red | OR10P1 |
| red | OR10Q1 |
| red | OR10R2 |
| red | OR10T2 |
| red | OR10V1 |
| red | OR10X1 |
| red | OR11A1 |
| red | OR11G2 |
| red | OR11L1 |
| red | OR12D3 |
| red | OR13C3 |
| red | OR13D1 |
| red | OR13F1 |
| red | OR13G1 |
| red | OR13J1 |
| red | OR14C36 |
| red | OR14J1 |
| red | OR1F1 |
| red | OR1I1 |
| red | OR1K1 |
| red | OR1L1 |
| red | OR1L3 |
| red | OR1L4 |
| red | OR1L6 |
| red | OR1M1 |
| red | OR1N2 |
| red | OR1S1 |
| red | OR2A12 |
| red | OR2AE1 |
| red | OR2AG2 |
| red | OR2AT4 |
| red | OR2B11 |
| red | OR2B2 |
| red | OR2B6 |
| red | OR2C1 |
| red | OR2D3 |
| red | OR2F1 |
| red | OR2F2 |
| red | OR2G2 |
| red | OR2G3 |
| red | OR2G6 |
| red | OR2H1 |
| red | OR2J3 |
| red | OR2L13 |
| red | OR2L2 |
| red | OR2L8 |
| red | OR2M5 |
| red | OR2S2 |
| red | OR2T27 |
| red | OR2T4 |
| red | OR2V2 |
| red | OR2W1 |
| red | OR4A15 |
| red | OR4A16 |
| red | OR4A47 |
| red | OR4A5 |
| red | OR4C11 |
| red | OR4C13 |
| red | OR4C15 |
| red | OR4C3 |
| red | OR4C45 |
| red | OR4C6 |
| red | OR4D10 |
| red | OR4D2 |
| red | OR4D6 |
| red | OR4D9 |
| red | OR4E2 |
| red | OR4F15 |
| red | OR4F29 |
| red | OR4F4 |
| red | OR4F6 |
| red | OR4K1 |
| red | OR4K13 |
| red | OR4K15 |
| red | OR4K2 |
| red | OR4K5 |
| red | OR4X1 |
| red | OR4X2 |
| red | OR51A7 |
| red | OR51B6 |
| red | OR51D1 |
| red | OR51E1 |
| red | OR51F2 |
| red | OR51Q1 |
| red | OR51S1 |
| red | OR51V1 |
| red | OR52A1 |
| red | OR52B6 |
| red | OR52E4 |
| red | OR52E8 |
| red | OR52I1 |
| red | OR52I2 |
| red | OR52J3 |
| red | OR52K1 |
| red | OR52N4 |
| red | OR56A4 |
| red | OR5A1 |
| red | OR5AK2 |
| red | OR5AN1 |
| red | OR5AP2 |
| red | OR5AR1 |
| red | OR5AU1 |
| red | OR5B12 |
| red | OR5B21 |
| red | OR5B3 |
| red | OR5C1 |
| red | OR5D13 |
| red | OR5D16 |
| red | OR5F1 |
| red | OR5H1 |
| red | OR5H15 |
| red | OR5H2 |
| red | OR5H6 |
| red | OR5I1 |
| red | OR5J2 |
| red | OR5L1 |
| red | OR5M1 |
| red | OR5M9 |
| red | OR5P2 |
| red | OR5P3 |
| red | OR5T2 |
| red | OR5T3 |
| red | OR5V1 |
| red | OR6B1 |
| red | OR6C1 |
| red | OR6C3 |
| red | OR6C4 |
| red | OR6C65 |
| red | OR6C68 |
| red | OR6C76 |
| red | OR6K2 |
| red | OR6K6 |
| red | OR6M1 |
| red | OR6N2 |
| red | OR6P1 |
| red | OR6Q1 |
| red | OR6Y1 |
| red | OR7C1 |
| red | OR8A1 |
| red | OR8B3 |
| red | OR8D1 |
| red | OR8D2 |
| red | OR8G5 |
| red | OR8I2 |
| red | OR8J1 |
| red | OR8K5 |
| red | OR8S1 |
| red | OR8U1 |
| red | OR9G4 |
| red | OR9K2 |
| red | OS9 |
| red | OSBPL2 |
| red | OSBPL3 |
| red | OSCAR |
| red | OSR1 |
| red | OSTN |
| red | OTOL1 |
| red | OTOP1 |
| red | OTOP2 |
| red | OTOS |
| red | OTP |
| red | OVOS2 |
| red | P2RX1 |
| red | P2RY4 |
| red | PABPC1L2A |
| red | PABPN1 |
| red | PADI3 |
| red | PANX3 |
| red | PASD1 |
| red | PAX5 |
| red | PBOV1 |
| red | PBX4 |
| red | PCSK1N |
| red | PCSK5 |
| red | PDE1C |
| red | PDE4C |
| red | PDGFRL |
| red | PDX1 |
| red | PDZK1IP1 |
| red | PENK |
| red | PF4V1 |
| red | PGA3 |
| red | PGF |
| red | PHF8 |
| red | PHKA1 |
| red | PHOX2B |
| red | PITX3 |
| red | PIWIL3 |
| red | PKD1L2 |
| red | PKNOX2 |
| red | PLA2G10 |
| red | PLA2G1B |
| red | PLA2G3 |
| red | PLA2G4D |
| red | PLA2G4F |
| red | PLAC8L1 |
| red | PLAC9 |
| red | PLCD4 |
| red | PLEKHG4 |
| red | PLEKHG4B |
| red | PLXNC1 |
| red | PNCK |
| red | PNLIP |
| red | PNLIPRP2 |
| red | PNLIPRP3 |
| red | PNOC |
| red | POLD1 |
| red | POLR2C |
| red | POMZP3 |
| red | POU3F2 |
| red | POU4F1 |
| red | POU4F2 |
| red | POU4F3 |
| red | POU5F1 |
| red | PPEF2 |
| red | PPFIA2 |
| red | PPFIA4 |
| red | PPM1E |
| red | PPY |
| red | PRAME |
| red | PRAMEF12 |
| red | PRAMEF20 |
| red | PRAMEF8 |
| red | PRB3 |
| red | PRDM12 |
| red | PRDM14 |
| red | PRDM5 |
| red | PRDM8 |
| red | PREP |
| red | PREX2 |
| red | PRIM2 |
| red | PRIMA1 |
| red | PRKAG3 |
| red | PRKAR2B |
| red | PRKCQ |
| red | PRKD1 |
| red | PRKD3 |
| red | PRL |
| red | PRLHR |
| red | PRM2 |
| red | PRND |
| red | PROK1 |
| red | PROX2 |
| red | PRPF19 |
| red | PRPH |
| red | PRPS1L1 |
| red | PRR18 |
| red | PRR19 |
| red | PRR20B |
| red | PRR22 |
| red | PRR23A |
| red | PRSS1 |
| red | PRSS38 |
| red | PRSS48 |
| red | PRTN3 |
| red | PSCA |
| red | PSG1 |
| red | PSG6 |
| red | PSKH2 |
| red | PSMB11 |
| red | PSMD13 |
| red | PSMD9 |
| red | PSORS1C1 |
| red | PSORS1C2 |
| red | PSPH |
| red | PSPN |
| red | PTCHD1 |
| red | PTCHD3 |
| red | PTGES |
| red | PTGFR |
| red | PTN |
| red | PTPN14 |
| red | PTPRN |
| red | PXT1 |
| red | PYY |
| red | QDPR |
| red | RAB12 |
| red | RAB33A |
| red | RAB3D |
| red | RAG2 |
| red | RAMP1 |
| red | RASD2 |
| red | RASL12 |
| red | RAX2 |
| red | RBM44 |
| red | RCVRN |
| red | REG1A |
| red | REG1B |
| red | RELL2 |
| red | RETN |
| red | RETNLB |
| red | RGMA |
| red | RGS17 |
| red | RGS20 |
| red | RGS9BP |
| red | RHAG |
| red | RIBC2 |
| red | RIC3 |
| red | RIMKLA |
| red | RIMS1 |
| red | RLBP1 |
| red | RLN1 |
| red | RNASE13 |
| red | RNASE2 |
| red | RNASE8 |
| red | RNASE9 |
| red | RNF182 |
| red | ROS1 |
| red | RPE65 |
| red | RPH3A |
| red | RPIA |
| red | RPL35A |
| red | RPL39L |
| red | RPS6KA1 |
| red | RRM2 |
| red | RRP8 |
| red | RSPH9 |
| red | RSPO4 |
| red | RTKN2 |
| red | RTP2 |
| red | S100A14 |
| red | S100A2 |
| red | S100A7A |
| red | S1PR2 |
| red | SAG |
| red | SAGE1 |
| red | SAMD7 |
| red | SBK2 |
| red | SCG3 |
| red | SCGB1A1 |
| red | SCGB2A1 |
| red | SCGB3A1 |
| red | SCML4 |
| red | SCN10A |
| red | SCN1A |
| red | SCNN1B |
| red | SCRG1 |
| red | SCTR |
| red | SCUBE3 |
| red | SDK2 |
| red | SEBOX |
| red | SEMA3A |
| red | SEMA4A |
| red | SERPINB13 |
| red | SERPINB3 |
| red | SERPINB4 |
| red | SEZ6 |
| red | SEZ6L |
| red | SF3B2 |
| red | SFN |
| red | SFTPB |
| red | SH2D4B |
| red | SH2D7 |
| red | SHISA2 |
| red | SIAE |
| red | SIRPB1 |
| red | SIRPD |
| red | SIX3 |
| red | SIX4 |
| red | SLAIN2 |
| red | SLAMF7 |
| red | SLC10A2 |
| red | SLC13A4 |
| red | SLC16A8 |
| red | SLC22A13 |
| red | SLC22A8 |
| red | SLC24A2 |
| red | SLC26A2 |
| red | SLC26A3 |
| red | SLC26A8 |
| red | SLC30A4 |
| red | SLC30A8 |
| red | SLC35E4 |
| red | SLC35F3 |
| red | SLC36A2 |
| red | SLC38A8 |
| red | SLC39A7 |
| red | SLC45A2 |
| red | SLC4A1 |
| red | SLC4A8 |
| red | SLC5A11 |
| red | SLC5A5 |
| red | SLC5A7 |
| red | SLC5A8 |
| red | SLC6A11 |
| red | SLC6A17 |
| red | SLC6A18 |
| red | SLC6A5 |
| red | SLC7A11 |
| red | SLC7A6OS |
| red | SLC8A2 |
| red | SLC8A3 |
| red | SLC9A4 |
| red | SLFN11 |
| red | SLFN13 |
| red | SLITRK1 |
| red | SLITRK4 |
| red | SLN |
| red | SMC1B |
| red | SMYD1 |
| red | SNORA58 |
| red | SNRNP35 |
| red | SNX20 |
| red | SNX32 |
| red | SOX11 |
| red | SOX14 |
| red | SOX21 |
| red | SOX3 |
| red | SP7 |
| red | SP8 |
| red | SPANXA1 |
| red | SPATA12 |
| red | SPATA16 |
| red | SPATA3 |
| red | SPATA8 |
| red | SPDEF |
| red | SPDYE1 |
| red | SPEM1 |
| red | SPHKAP |
| red | SPINK4 |
| red | SPINK7 |
| red | SPINT3 |
| red | SPRR2A |
| red | SPRR2B |
| red | SPRR2E |
| red | SPRR3 |
| red | SPRR4 |
| red | SPRY3 |
| red | SPTA1 |
| red | SRA1 |
| red | SRD5A3 |
| red | SRMS |
| red | SRRM4 |
| red | SSH2 |
| red | SST |
| red | SSTR5 |
| red | SSX1 |
| red | SSX4B |
| red | ST6GALNAC2 |
| red | ST6GALNAC5 |
| red | ST8SIA2 |
| red | ST8SIA5 |
| red | STH |
| red | STRC |
| red | STX18 |
| red | STX1A |
| red | STX1B |
| red | STYK1 |
| red | SULT1C3 |
| red | SULT2B1 |
| red | SUSD3 |
| red | SV2C |
| red | SVOP |
| red | SYCN |
| red | SYN1 |
| red | SYNPO2L |
| red | SYNPR |
| red | SYT13 |
| red | SYT4 |
| red | SYT6 |
| red | SYTL5 |
| red | TAAR9 |
| red | TAGLN3 |
| red | TAL1 |
| red | TAS1R1 |
| red | TAS2R1 |
| red | TAS2R16 |
| red | TAS2R42 |
| red | TAS2R5 |
| red | TAS2R9 |
| red | TAX1BP3 |
| red | TBC1D1 |
| red | TBC1D26 |
| red | TBC1D3B |
| red | TBR1 |
| red | TCF15 |
| red | TDRD12 |
| red | TDRD6 |
| red | TEAD1 |
| red | TEKT2 |
| red | TET1 |
| red | TEX101 |
| red | TEX13A |
| red | TEX14 |
| red | TEX28 |
| red | TEX9 |
| red | TFAP2B |
| red | TFAP2C |
| red | TFAP2D |
| red | TFDP3 |
| red | TFF1 |
| red | TFPI2 |
| red | TFPT |
| red | TGM5 |
| red | TH |
| red | THRB |
| red | THSD1 |
| red | TIGD1 |
| red | TIMP4 |
| red | TLE3 |
| red | TLR7 |
| red | TLR9 |
| red | TM4SF19 |
| red | TM4SF20 |
| red | TM6SF1 |
| red | TMC7 |
| red | TMCO2 |
| red | TMEFF2 |
| red | TMEM11 |
| red | TMEM117 |
| red | TMEM121 |
| red | TMEM125 |
| red | TMEM145 |
| red | TMEM225 |
| red | TMEM40 |
| red | TMIGD1 |
| red | TMPRSS11D |
| red | TMPRSS11F |
| red | TNFAIP8L2 |
| red | TNFRSF13C |
| red | TNFRSF8 |
| red | TNFSF9 |
| red | TNNC1 |
| red | TNR |
| red | TOMM20L |
| red | TOX |
| red | TOX3 |
| red | TP53TG3 |
| red | TPH1 |
| red | TPM4 |
| red | TPRX1 |
| red | TPTE |
| red | TPX2 |
| red | TRAF2 |
| red | TRAIP |
| red | TRAPPC10 |
| red | TREM2 |
| red | TREX2 |
| red | TRH |
| red | TRHR |
| red | TRIM16 |
| red | TRIM48 |
| red | TRIM50 |
| red | TRIM68 |
| red | TRIM69 |
| red | TRIM71 |
| red | TRPA1 |
| red | TRPC3 |
| red | TRPM1 |
| red | TRPS1 |
| red | TRPV3 |
| red | TSEN15 |
| red | TSGA10 |
| red | TSGA10IP |
| red | TSKS |
| red | TSPAN16 |
| red | TSPO |
| red | TSSK6 |
| red | TTC17 |
| red | TTC22 |
| red | TTC9 |
| red | TTLL10 |
| red | TTLL6 |
| red | TTLL7 |
| red | TUBAL3 |
| red | TULP2 |
| red | TXNDC2 |
| red | UBL4B |
| red | UBQLNL |
| red | UBTF |
| red | UBXN10 |
| red | UGT8 |
| red | UHRF1 |
| red | ULBP2 |
| red | ULK4 |
| red | UNC119B |
| red | UNC45B |
| red | UNC5D |
| red | UPK1A |
| red | USP29 |
| red | USP40 |
| red | USP54 |
| red | UTF1 |
| red | VCY |
| red | VDAC2 |
| red | VDR |
| red | VEPH1 |
| red | VHLL |
| red | VIT |
| red | VN1R4 |
| red | VPREB1 |
| red | VPS11 |
| red | VWA3A |
| red | VWC2 |
| red | WFDC10A |
| red | WFDC3 |
| red | WFDC5 |
| red | WFDC9 |
| red | WFIKKN2 |
| red | WIPF1 |
| red | WNK4 |
| red | WNT1 |
| red | WNT10B |
| red | WSCD1 |
| red | WT1 |
| red | XAGE1A |
| red | XIRP2 |
| red | XKR5 |
| red | YIPF7 |
| red | YJEFN3 |
| red | ZBTB12 |
| red | ZBTB38 |
| red | ZFP90 |
| red | ZFPM2 |
| red | ZFR2 |
| red | ZIM3 |
| red | ZMYND10 |
| red | ZNF219 |
| red | ZNF233 |
| red | ZNF236 |
| red | ZNF280B |
| red | ZNF287 |
| red | ZNF319 |
| red | ZNF385C |
| red | ZNF391 |
| red | ZNF408 |
| red | ZNF439 |
| red | ZNF442 |
| red | ZNF488 |
| red | ZNF500 |
| red | ZNF518B |
| red | ZNF543 |
| red | ZNF554 |
| red | ZNF560 |
| red | ZNF660 |
| red | ZNF674 |
| red | ZNF69 |
| red | ZNF691 |
| red | ZNF70 |
| red | ZNF750 |
| red | ZNF771 |
| red | ZNF786 |
| red | ZNF804A |
| red | ZNF804B |
| red | ZNF808 |
| red | ZNF827 |
| red | ZNF835 |
| red | ZNF843 |
| red | ZNFX1 |
| red | ZNHIT2 |
| red | ZSCAN10 |
| red | ZSCAN4 |
| red | ZSWIM2 |
| red | ZYG11A |
| turquoise | AADAC |
| turquoise | AADAT |
| turquoise | AASDHPPT |
| turquoise | AASS |
| turquoise | ABCA10 |
| turquoise | ABCA5 |
| turquoise | ABCB11 |
| turquoise | ABCB4 |
| turquoise | ABCB7 |
| turquoise | ABCC1 |
| turquoise | ABCC4 |
| turquoise | ABCC9 |
| turquoise | ABCD3 |
| turquoise | ABHD10 |
| turquoise | ABHD13 |
| turquoise | ABHD2 |
| turquoise | ABL2 |
| turquoise | ACAA1 |
| turquoise | ACADSB |
| turquoise | ACAT2 |
| turquoise | ACBD5 |
| turquoise | ACCS |
| turquoise | ACE2 |
| turquoise | ACO2 |
| turquoise | ACOT12 |
| turquoise | ACOT4 |
| turquoise | ACRBP |
| turquoise | ACSL1 |
| turquoise | ACSL4 |
| turquoise | ACSM3 |
| turquoise | ACSM5 |
| turquoise | ACSS1 |
| turquoise | ACSS3 |
| turquoise | ACTC1 |
| turquoise | ACTG2 |
| turquoise | ACTR10 |
| turquoise | ACTR1A |
| turquoise | ACTR8 |
| turquoise | ACVR1C |
| turquoise | ACY1 |
| turquoise | ADAMTS16 |
| turquoise | ADAP2 |
| turquoise | ADAT2 |
| turquoise | ADCY3 |
| turquoise | ADCY4 |
| turquoise | ADH5 |
| turquoise | ADH7 |
| turquoise | ADK |
| turquoise | ADRA1A |
| turquoise | AEBP2 |
| turquoise | AFP |
| turquoise | AGA |
| turquoise | AGBL2 |
| turquoise | AGPAT4 |
| turquoise | AGPAT5 |
| turquoise | AGPS |
| turquoise | AGR2 |
| turquoise | AGR3 |
| turquoise | AGTPBP1 |
| turquoise | AGTR1 |
| turquoise | AHDC1 |
| turquoise | AHI1 |
| turquoise | AIF1L |
| turquoise | AKR1B1 |
| turquoise | AKR1C3 |
| turquoise | ALAS1 |
| turquoise | ALDH18A1 |
| turquoise | ALDH1A2 |
| turquoise | ALDH8A1 |
| turquoise | ALG11 |
| turquoise | ALG13 |
| turquoise | ALG1L |
| turquoise | ALG5 |
| turquoise | ALKBH4 |
| turquoise | AMBP |
| turquoise | AMHR2 |
| turquoise | AMN |
| turquoise | AMN1 |
| turquoise | AMPD1 |
| turquoise | ANAPC7 |
| turquoise | ANGPTL3 |
| turquoise | ANKAR |
| turquoise | ANKDD1A |
| turquoise | ANKMY2 |
| turquoise | ANKRD27 |
| turquoise | ANKRD50 |
| turquoise | ANO6 |
| turquoise | ANP32A |
| turquoise | ANP32E |
| turquoise | ANXA10 |
| turquoise | ANXA13 |
| turquoise | AOAH |
| turquoise | AP3M1 |
| turquoise | APC |
| turquoise | APCDD1 |
| turquoise | APCS |
| turquoise | APOA4 |
| turquoise | APOBEC3B |
| turquoise | APOL3 |
| turquoise | APOO |
| turquoise | APPL1 |
| turquoise | AQP10 |
| turquoise | AQP8 |
| turquoise | ARFGEF1 |
| turquoise | ARHGAP15 |
| turquoise | ARHGAP19 |
| turquoise | ARHGAP29 |
| turquoise | ARHGEF17 |
| turquoise | ARHGEF19 |
| turquoise | ARL10 |
| turquoise | ARL13B |
| turquoise | ARL15 |
| turquoise | ARMC1 |
| turquoise | ARMCX2 |
| turquoise | ARMCX5 |
| turquoise | ARMCX6 |
| turquoise | ARPC5L |
| turquoise | ARRDC3 |
| turquoise | ART3 |
| turquoise | ART4 |
| turquoise | ART5 |
| turquoise | ARV1 |
| turquoise | ASAP3 |
| turquoise | ASB9 |
| turquoise | ASF1A |
| turquoise | ASIP |
| turquoise | ASMT |
| turquoise | ASNS |
| turquoise | ASPA |
| turquoise | ASPG |
| turquoise | ASPH |
| turquoise | ASPM |
| turquoise | ASPN |
| turquoise | ATAD2 |
| turquoise | ATAD2B |
| turquoise | ATF1 |
| turquoise | ATF7IP |
| turquoise | ATG10 |
| turquoise | ATG16L2 |
| turquoise | ATG2B |
| turquoise | ATG4C |
| turquoise | ATG5 |
| turquoise | ATOH8 |
| turquoise | ATP11C |
| turquoise | ATP2B4 |
| turquoise | ATP8B1 |
| turquoise | ATP8B4 |
| turquoise | ATXN3 |
| turquoise | AUH |
| turquoise | AURKA |
| turquoise | AVIL |
| turquoise | AZGP1 |
| turquoise | B3GAT1 |
| turquoise | B3GNT2 |
| turquoise | B3GNT6 |
| turquoise | B3GNT7 |
| turquoise | B4GALT4 |
| turquoise | B4GALT6 |
| turquoise | BAG2 |
| turquoise | BAIAP2L2 |
| turquoise | BARD1 |
| turquoise | BBOX1 |
| turquoise | BBS10 |
| turquoise | BCAS1 |
| turquoise | BCHE |
| turquoise | BCL2L11 |
| turquoise | BCO2 |
| turquoise | BET1 |
| turquoise | BFAR |
| turquoise | BHLHA15 |
| turquoise | BHLHB9 |
| turquoise | BHLHE22 |
| turquoise | BIK |
| turquoise | BIN3 |
| turquoise | BIRC6 |
| turquoise | BIVM |
| turquoise | BLZF1 |
| turquoise | BMP10 |
| turquoise | BMP15 |
| turquoise | BMP5 |
| turquoise | BMPR1A |
| turquoise | BRCA1 |
| turquoise | BRCC3 |
| turquoise | BRMS1L |
| turquoise | BRS3 |
| turquoise | BSN |
| turquoise | BST2 |
| turquoise | BTBD16 |
| turquoise | BTD |
| turquoise | BTK |
| turquoise | BTN3A1 |
| turquoise | BTN3A2 |
| turquoise | BZW1 |
| turquoise | C10orf62 |
| turquoise | C10orf88 |
| turquoise | C11orf45 |
| turquoise | C11orf54 |
| turquoise | C11orf65 |
| turquoise | C11orf80 |
| turquoise | C12orf29 |
| turquoise | C12orf45 |
| turquoise | C12orf65 |
| turquoise | C14orf177 |
| turquoise | C14orf28 |
| turquoise | C17orf80 |
| turquoise | C17orf97 |
| turquoise | C18orf21 |
| turquoise | C18orf32 |
| turquoise | C19orf73 |
| turquoise | C1QA |
| turquoise | C1QBP |
| turquoise | C1orf112 |
| turquoise | C1orf162 |
| turquoise | C1orf174 |
| turquoise | C1orf229 |
| turquoise | C1orf43 |
| turquoise | C21orf91 |
| turquoise | C2orf49 |
| turquoise | C3AR1 |
| turquoise | C3orf14 |
| turquoise | C4orf33 |
| turquoise | C5orf22 |
| turquoise | C9orf106 |
| turquoise | C9orf129 |
| turquoise | C9orf152 |
| turquoise | C9orf43 |
| turquoise | C9orf64 |
| turquoise | CA1 |
| turquoise | CA12 |
| turquoise | CA13 |
| turquoise | CA4 |
| turquoise | CA5A |
| turquoise | CA5B |
| turquoise | CABIN1 |
| turquoise | CABLES2 |
| turquoise | CACNB3 |
| turquoise | CADM2 |
| turquoise | CADM4 |
| turquoise | CALCRL |
| turquoise | CALML4 |
| turquoise | CALR |
| turquoise | CAMTA1 |
| turquoise | CAPN7 |
| turquoise | CARD16 |
| turquoise | CARD6 |
| turquoise | CASP1 |
| turquoise | CASP3 |
| turquoise | CASP6 |
| turquoise | CASP7 |
| turquoise | CASP8AP2 |
| turquoise | CASQ1 |
| turquoise | CAV2 |
| turquoise | CBLN1 |
| turquoise | CBWD5 |
| turquoise | CBX1 |
| turquoise | CBX6 |
| turquoise | CCAR1 |
| turquoise | CCDC110 |
| turquoise | CCDC117 |
| turquoise | CCDC125 |
| turquoise | CCDC127 |
| turquoise | CCDC149 |
| turquoise | CCDC25 |
| turquoise | CCDC47 |
| turquoise | CCDC66 |
| turquoise | CCDC85A |
| turquoise | CCDC91 |
| turquoise | CCDC93 |
| turquoise | CCL13 |
| turquoise | CCL22 |
| turquoise | CCL5 |
| turquoise | CCL7 |
| turquoise | CCL8 |
| turquoise | CCNG2 |
| turquoise | CCR1 |
| turquoise | CCR7 |
| turquoise | CCT3 |
| turquoise | CCT6B |
| turquoise | CD160 |
| turquoise | CD163 |
| turquoise | CD163L1 |
| turquoise | CD164L2 |
| turquoise | CD1C |
| turquoise | CD200R1 |
| turquoise | CD226 |
| turquoise | CD27 |
| turquoise | CD300A |
| turquoise | CD300LB |
| turquoise | CD300LD |
| turquoise | CD320 |
| turquoise | CD37 |
| turquoise | CD3E |
| turquoise | CD47 |
| turquoise | CD53 |
| turquoise | CD55 |
| turquoise | CD5L |
| turquoise | CD63 |
| turquoise | CD72 |
| turquoise | CD83 |
| turquoise | CDADC1 |
| turquoise | CDC123 |
| turquoise | CDC5L |
| turquoise | CDC73 |
| turquoise | CDCA3 |
| turquoise | CDCA5 |
| turquoise | CDCA7L |
| turquoise | CDH2 |
| turquoise | CDH23 |
| turquoise | CDK3 |
| turquoise | CDK5RAP2 |
| turquoise | CDK8 |
| turquoise | CDKN1A |
| turquoise | CDNF |
| turquoise | CDS1 |
| turquoise | CEBPG |
| turquoise | CELSR2 |
| turquoise | CENPBD1 |
| turquoise | CENPN |
| turquoise | CENPO |
| turquoise | CEP120 |
| turquoise | CEP290 |
| turquoise | CEP57 |
| turquoise | CEP68 |
| turquoise | CETN3 |
| turquoise | CETP |
| turquoise | CFDP1 |
| turquoise | CFHR1 |
| turquoise | CFHR2 |
| turquoise | CFHR3 |
| turquoise | CFHR4 |
| turquoise | CFHR5 |
| turquoise | CFL2 |
| turquoise | CHCHD1 |
| turquoise | CHCHD2 |
| turquoise | CHCHD3 |
| turquoise | CHEK1 |
| turquoise | CHIC2 |
| turquoise | CHML |
| turquoise | CHMP2A |
| turquoise | CHMP4A |
| turquoise | CHMP4C |
| turquoise | CHRNA4 |
| turquoise | CHST12 |
| turquoise | CHST14 |
| turquoise | CHST9 |
| turquoise | CHURC1 |
| turquoise | CIDEC |
| turquoise | CISH |
| turquoise | CKAP2 |
| turquoise | CKM |
| turquoise | CLASP1 |
| turquoise | CLCF1 |
| turquoise | CLCN5 |
| turquoise | CLDN5 |
| turquoise | CLDN7 |
| turquoise | CLEC1B |
| turquoise | CLEC2B |
| turquoise | CLEC4C |
| turquoise | CLEC4F |
| turquoise | CLEC4M |
| turquoise | CLGN |
| turquoise | CLIC6 |
| turquoise | CLIP3 |
| turquoise | CLIP4 |
| turquoise | CLK4 |
| turquoise | CLMN |
| turquoise | CLOCK |
| turquoise | CLP1 |
| turquoise | CLRN3 |
| turquoise | CLSTN3 |
| turquoise | CLTC |
| turquoise | CMC1 |
| turquoise | CMPK2 |
| turquoise | CNGA1 |
| turquoise | CNN1 |
| turquoise | CNNM1 |
| turquoise | CNNM4 |
| turquoise | CNPY2 |
| turquoise | CNTN3 |
| turquoise | COCH |
| turquoise | COG1 |
| turquoise | COG4 |
| turquoise | COG5 |
| turquoise | COL15A1 |
| turquoise | COL16A1 |
| turquoise | COL22A1 |
| turquoise | COL28A1 |
| turquoise | COL4A3 |
| turquoise | COL4A4 |
| turquoise | COL5A3 |
| turquoise | COL6A1 |
| turquoise | COL7A1 |
| turquoise | COMMD10 |
| turquoise | COMMD2 |
| turquoise | COMMD8 |
| turquoise | COMMD9 |
| turquoise | COPS2 |
| turquoise | COPS6 |
| turquoise | COPZ1 |
| turquoise | COQ10B |
| turquoise | COQ3 |
| turquoise | COQ7 |
| turquoise | CORO1C |
| turquoise | CORO2B |
| turquoise | COX10 |
| turquoise | COX15 |
| turquoise | COX18 |
| turquoise | COX7A1 |
| turquoise | COX7B |
| turquoise | CPB2 |
| turquoise | CPEB3 |
| turquoise | CPLX1 |
| turquoise | CPNE6 |
| turquoise | CPOX |
| turquoise | CPPED1 |
| turquoise | CPT1A |
| turquoise | CPT2 |
| turquoise | CPVL |
| turquoise | CPXM2 |
| turquoise | CR1 |
| turquoise | CREBL2 |
| turquoise | CREBZF |
| turquoise | CRELD2 |
| turquoise | CREM |
| turquoise | CRHBP |
| turquoise | CROT |
| turquoise | CRYBB3 |
| turquoise | CRYGD |
| turquoise | CRYZ |
| turquoise | CSF2RB |
| turquoise | CSF3 |
| turquoise | CSGALNACT2 |
| turquoise | CSNK1A1 |
| turquoise | CST1 |
| turquoise | CSTF2T |
| turquoise | CTAG2 |
| turquoise | CTBS |
| turquoise | CTCF |
| turquoise | CTF1 |
| turquoise | CTH |
| turquoise | CTNNA3 |
| turquoise | CTNNB1 |
| turquoise | CTNNBL1 |
| turquoise | CTNND1 |
| turquoise | CTSK |
| turquoise | CUL1 |
| turquoise | CUX2 |
| turquoise | CX3CR1 |
| turquoise | CXCL10 |
| turquoise | CXCL14 |
| turquoise | CXCL9 |
| turquoise | CXorf38 |
| turquoise | CYB561D1 |
| turquoise | CYB5B |
| turquoise | CYB5R1 |
| turquoise | CYB5R2 |
| turquoise | CYGB |
| turquoise | CYP26B1 |
| turquoise | CYP27A1 |
| turquoise | CYP2A13 |
| turquoise | CYP2C9 |
| turquoise | CYP2S1 |
| turquoise | CYP39A1 |
| turquoise | CYP3A43 |
| turquoise | CYP3A7 |
| turquoise | CYP4F22 |
| turquoise | CYP4X1 |
| turquoise | CYP4Z1 |
| turquoise | CYP51A1 |
| turquoise | CYP7B1 |
| turquoise | CYSLTR1 |
| turquoise | CYTH2 |
| turquoise | DAB1 |
| turquoise | DACT1 |
| turquoise | DACT2 |
| turquoise | DBH |
| turquoise | DBI |
| turquoise | DBN1 |
| turquoise | DCK |
| turquoise | DCTN4 |
| turquoise | DCTN5 |
| turquoise | DCTN6 |
| turquoise | DCUN1D1 |
| turquoise | DCUN1D5 |
| turquoise | DDAH1 |
| turquoise | DDHD1 |
| turquoise | DDOST |
| turquoise | DDX23 |
| turquoise | DDX27 |
| turquoise | DDX46 |
| turquoise | DDX58 |
| turquoise | DDX6 |
| turquoise | DDX60L |
| turquoise | DEAF1 |
| turquoise | DENND2A |
| turquoise | DENND2C |
| turquoise | DENND5B |
| turquoise | DEPDC7 |
| turquoise | DERL2 |
| turquoise | DGKG |
| turquoise | DHCR7 |
| turquoise | DHDDS |
| turquoise | DHFR |
| turquoise | DHRS4L2 |
| turquoise | DHRS7 |
| turquoise | DIS3L |
| turquoise | DISP1 |
| turquoise | DKK4 |
| turquoise | DLAT |
| turquoise | DLD |
| turquoise | DLG1 |
| turquoise | DLK1 |
| turquoise | DMGDH |
| turquoise | DMXL1 |
| turquoise | DNAH1 |
| turquoise | DNAH2 |
| turquoise | DNAJA4 |
| turquoise | DNAJB11 |
| turquoise | DNAJB4 |
| turquoise | DNAJC10 |
| turquoise | DNAJC12 |
| turquoise | DNAJC13 |
| turquoise | DNAJC22 |
| turquoise | DNAJC24 |
| turquoise | DNAJC30 |
| turquoise | DNAJC7 |
| turquoise | DND1 |
| turquoise | DNHD1 |
| turquoise | DNM1 |
| turquoise | DOC2B |
| turquoise | DOCK10 |
| turquoise | DOCK9 |
| turquoise | DOK3 |
| turquoise | DOK6 |
| turquoise | DOLK |
| turquoise | DPH3 |
| turquoise | DPH5 |
| turquoise | DPM1 |
| turquoise | DPP4 |
| turquoise | DPY19L4 |
| turquoise | DPYSL3 |
| turquoise | DSC2 |
| turquoise | DSG1 |
| turquoise | DSP |
| turquoise | DTL |
| turquoise | DTX3L |
| turquoise | DUS3L |
| turquoise | DUS4L |
| turquoise | DUSP16 |
| turquoise | DUSP18 |
| turquoise | DVL2 |
| turquoise | DYNC1I2 |
| turquoise | DYNLT3 |
| turquoise | EAF1 |
| turquoise | EBF1 |
| turquoise | EBI3 |
| turquoise | ECHDC1 |
| turquoise | ECHDC3 |
| turquoise | ECM2 |
| turquoise | ECT2 |
| turquoise | EDN1 |
| turquoise | EDNRB |
| turquoise | EEPD1 |
| turquoise | EFCAB1 |
| turquoise | EFCAB2 |
| turquoise | EFCAB7 |
| turquoise | EFEMP2 |
| turquoise | EFHD1 |
| turquoise | EFNB1 |
| turquoise | EFNB2 |
| turquoise | EFNB3 |
| turquoise | EGFLAM |
| turquoise | EGLN1 |
| turquoise | EHMT1 |
| turquoise | EI24 |
| turquoise | EIF1AX |
| turquoise | EIF2B3 |
| turquoise | EIF2B5 |
| turquoise | EIF2S1 |
| turquoise | EIF2S2 |
| turquoise | EIF3E |
| turquoise | EIF5B |
| turquoise | ELF4 |
| turquoise | ELFN2 |
| turquoise | ELMO1 |
| turquoise | ELMOD2 |
| turquoise | ELOF1 |
| turquoise | ELOVL2 |
| turquoise | ELOVL4 |
| turquoise | ELP2 |
| turquoise | ELP4 |
| turquoise | EMCN |
| turquoise | EMILIN3 |
| turquoise | ENAM |
| turquoise | ENC1 |
| turquoise | ENPP1 |
| turquoise | ENPP2 |
| turquoise | ENPP3 |
| turquoise | ENPP4 |
| turquoise | EOMES |
| turquoise | EPB41 |
| turquoise | EPB41L2 |
| turquoise | EPB41L5 |
| turquoise | EPDR1 |
| turquoise | EPHB1 |
| turquoise | EPHX1 |
| turquoise | EPS15L1 |
| turquoise | EPSTI1 |
| turquoise | ERAP1 |
| turquoise | ERAP2 |
| turquoise | ERCC6 |
| turquoise | ERF |
| turquoise | ERGIC3 |
| turquoise | ERH |
| turquoise | ERI2 |
| turquoise | ERICH1 |
| turquoise | ERLIN1 |
| turquoise | ESCO1 |
| turquoise | ESF1 |
| turquoise | ETAA1 |
| turquoise | EVI2B |
| turquoise | EXOC4 |
| turquoise | EXOC8 |
| turquoise | EXOSC7 |
| turquoise | EXOSC8 |
| turquoise | EXPH5 |
| turquoise | EZR |
| turquoise | F13B |
| turquoise | F2RL2 |
| turquoise | F8 |
| turquoise | FABP1 |
| turquoise | FABP5 |
| turquoise | FADD |
| turquoise | FAM104A |
| turquoise | FAM111B |
| turquoise | FAM114A1 |
| turquoise | FAM118A |
| turquoise | FAM126B |
| turquoise | FAM149B1 |
| turquoise | FAM161B |
| turquoise | FAM172A |
| turquoise | FAM174A |
| turquoise | FAM180A |
| turquoise | FAM193B |
| turquoise | FAM32A |
| turquoise | FAM43B |
| turquoise | FAM71E1 |
| turquoise | FAM76A |
| turquoise | FAM76B |
| turquoise | FAM91A1 |
| turquoise | FANCC |
| turquoise | FANCL |
| turquoise | FAS |
| turquoise | FASTKD1 |
| turquoise | FASTKD2 |
| turquoise | FAT1 |
| turquoise | FBXL3 |
| turquoise | FBXL4 |
| turquoise | FBXO4 |
| turquoise | FBXO46 |
| turquoise | FBXO8 |
| turquoise | FCAR |
| turquoise | FCGR3A |
| turquoise | FDFT1 |
| turquoise | FDX1 |
| turquoise | FEM1C |
| turquoise | FGD4 |
| turquoise | FGD5 |
| turquoise | FGD6 |
| turquoise | FGFBP2 |
| turquoise | FGFR1OP2 |
| turquoise | FGGY |
| turquoise | FGL2 |
| turquoise | FHL1 |
| turquoise | FHL3 |
| turquoise | FHL5 |
| turquoise | FHOD3 |
| turquoise | FIBIN |
| turquoise | FICD |
| turquoise | FIGNL1 |
| turquoise | FIS1 |
| turquoise | FITM2 |
| turquoise | FKBP14 |
| turquoise | FKBP2 |
| turquoise | FKBP3 |
| turquoise | FKBP4 |
| turquoise | FLI1 |
| turquoise | FLNC |
| turquoise | FLT1 |
| turquoise | FMNL2 |
| turquoise | FMO4 |
| turquoise | FOLH1 |
| turquoise | FOXC1 |
| turquoise | FOXP4 |
| turquoise | FPR3 |
| turquoise | FREM1 |
| turquoise | FRMD7 |
| turquoise | FRS3 |
| turquoise | FRY |
| turquoise | FSTL5 |
| turquoise | FUS |
| turquoise | FUT10 |
| turquoise | FXYD2 |
| turquoise | FZD3 |
| turquoise | FZD6 |
| turquoise | G3BP1 |
| turquoise | GABPB1 |
| turquoise | GABRA5 |
| turquoise | GABRB3 |
| turquoise | GABRP |
| turquoise | GADD45A |
| turquoise | GALNT2 |
| turquoise | GALNT7 |
| turquoise | GALR2 |
| turquoise | GAS2 |
| turquoise | GAS2L3 |
| turquoise | GAS8 |
| turquoise | GATA3 |
| turquoise | GATAD1 |
| turquoise | GBGT1 |
| turquoise | GBP1 |
| turquoise | GBP3 |
| turquoise | GBP4 |
| turquoise | GBP5 |
| turquoise | GBP7 |
| turquoise | GCAT |
| turquoise | GCC1 |
| turquoise | GCC2 |
| turquoise | GCH1 |
| turquoise | GCLM |
| turquoise | GCOM1 |
| turquoise | GCSH |
| turquoise | GDF15 |
| turquoise | GDPD5 |
| turquoise | GEN1 |
| turquoise | GFI1 |
| turquoise | GFM2 |
| turquoise | GFPT2 |
| turquoise | GGCT |
| turquoise | GGNBP2 |
| turquoise | GGT5 |
| turquoise | GIMAP1 |
| turquoise | GIMAP2 |
| turquoise | GIMAP7 |
| turquoise | GIMAP8 |
| turquoise | GINS2 |
| turquoise | GINS3 |
| turquoise | GIT2 |
| turquoise | GJA4 |
| turquoise | GJB1 |
| turquoise | GJB3 |
| turquoise | GK |
| turquoise | GK5 |
| turquoise | GKAP1 |
| turquoise | GLIPR1 |
| turquoise | GLIPR2 |
| turquoise | GLIS2 |
| turquoise | GLS |
| turquoise | GLT8D1 |
| turquoise | GLUD2 |
| turquoise | GLYATL1 |
| turquoise | GMFG |
| turquoise | GNA15 |
| turquoise | GNAI1 |
| turquoise | GNAO1 |
| turquoise | GNB4 |
| turquoise | GNE |
| turquoise | GNPNAT1 |
| turquoise | GOLGA1 |
| turquoise | GOLIM4 |
| turquoise | GOLT1B |
| turquoise | GOPC |
| turquoise | GOSR1 |
| turquoise | GP6 |
| turquoise | GPATCH1 |
| turquoise | GPD2 |
| turquoise | GPLD1 |
| turquoise | GPM6B |
| turquoise | GPN3 |
| turquoise | GPNMB |
| turquoise | GPR107 |
| turquoise | GPR160 |
| turquoise | GPR174 |
| turquoise | GPR37 |
| turquoise | GPR4 |
| turquoise | GPR65 |
| turquoise | GPR75 |
| turquoise | GPR82 |
| turquoise | GPR83 |
| turquoise | GPX8 |
| turquoise | GRAMD1C |
| turquoise | GRB7 |
| turquoise | GREB1 |
| turquoise | GREM1 |
| turquoise | GRHL2 |
| turquoise | GRIA3 |
| turquoise | GRID1 |
| turquoise | GRPEL1 |
| turquoise | GSDMA |
| turquoise | GSPT2 |
| turquoise | GSTA2 |
| turquoise | GSTA4 |
| turquoise | GSTM5 |
| turquoise | GTF2H3 |
| turquoise | GTPBP10 |
| turquoise | GTSE1 |
| turquoise | GUCY1A2 |
| turquoise | GUF1 |
| turquoise | GXYLT2 |
| turquoise | GYS2 |
| turquoise | GZMA |
| turquoise | GZMK |
| turquoise | HACL1 |
| turquoise | HADH |
| turquoise | HAS1 |
| turquoise | HAT1 |
| turquoise | HAUS6 |
| turquoise | HAVCR2 |
| turquoise | HBA2 |
| turquoise | HBB |
| turquoise | HBP1 |
| turquoise | HCFC2 |
| turquoise | HDAC8 |
| turquoise | HEATR6 |
| turquoise | HECW2 |
| turquoise | HELZ |
| turquoise | HEMK1 |
| turquoise | HEPN1 |
| turquoise | HERC5 |
| turquoise | HERC6 |
| turquoise | HES1 |
| turquoise | HES4 |
| turquoise | HEXIM1 |
| turquoise | HEYL |
| turquoise | HGF |
| turquoise | HGFAC |
| turquoise | HHIP |
| turquoise | HIBCH |
| turquoise | HIC1 |
| turquoise | HIF1A |
| turquoise | HINT3 |
| turquoise | HIVEP2 |
| turquoise | HK2 |
| turquoise | HK3 |
| turquoise | HLA-DMA |
| turquoise | HLA-DOB |
| turquoise | HLA-DQB2 |
| turquoise | HMG20A |
| turquoise | HMGB2 |
| turquoise | HMGB3 |
| turquoise | HMGCR |
| turquoise | HMGCS1 |
| turquoise | HMOX2 |
| turquoise | HMX2 |
| turquoise | HNF4G |
| turquoise | HNRNPA3 |
| turquoise | HNRNPH2 |
| turquoise | HOMER1 |
| turquoise | HOOK1 |
| turquoise | HOXA5 |
| turquoise | HOXD1 |
| turquoise | HPCA |
| turquoise | HPD |
| turquoise | HPGD |
| turquoise | HPR |
| turquoise | HPRT1 |
| turquoise | HPS3 |
| turquoise | HS3ST1 |
| turquoise | HSD11B1 |
| turquoise | HSD17B11 |
| turquoise | HSD17B13 |
| turquoise | HSD17B8 |
| turquoise | HSDL1 |
| turquoise | HSF2 |
| turquoise | HSPA12A |
| turquoise | HSPA4L |
| turquoise | HSPB6 |
| turquoise | HSPB7 |
| turquoise | HSPB8 |
| turquoise | HSPB9 |
| turquoise | HSPE1 |
| turquoise | HTATIP2 |
| turquoise | HTATSF1 |
| turquoise | HUS1 |
| turquoise | HYOU1 |
| turquoise | ICA1 |
| turquoise | ICAM4 |
| turquoise | ICOSLG |
| turquoise | ID4 |
| turquoise | IDE |
| turquoise | IDH1 |
| turquoise | IDI1 |
| turquoise | IDO2 |
| turquoise | IFI16 |
| turquoise | IFI27 |
| turquoise | IFI44 |
| turquoise | IFI44L |
| turquoise | IFI6 |
| turquoise | IFIH1 |
| turquoise | IFIT1 |
| turquoise | IFIT2 |
| turquoise | IFIT3 |
| turquoise | IFIT5 |
| turquoise | IFITM1 |
| turquoise | IFNAR2 |
| turquoise | IFT74 |
| turquoise | IFT80 |
| turquoise | IGF1 |
| turquoise | IGF2 |
| turquoise | IGFBP6 |
| turquoise | IGSF21 |
| turquoise | IGSF6 |
| turquoise | IK |
| turquoise | IKZF4 |
| turquoise | IL13RA2 |
| turquoise | IL17RB |
| turquoise | IL18 |
| turquoise | IL1B |
| turquoise | IL1RAP |
| turquoise | IL1RAPL1 |
| turquoise | IL1RAPL2 |
| turquoise | IL32 |
| turquoise | IL33 |
| turquoise | IL7 |
| turquoise | IMMP1L |
| turquoise | IMPA1 |
| turquoise | ING4 |
| turquoise | INHBC |
| turquoise | INO80C |
| turquoise | INPPL1 |
| turquoise | INSIG2 |
| turquoise | INTS2 |
| turquoise | INTS7 |
| turquoise | IPO8 |
| turquoise | IPP |
| turquoise | IRF5 |
| turquoise | IRF8 |
| turquoise | ISG15 |
| turquoise | ISL1 |
| turquoise | ISY1 |
| turquoise | ITFG1 |
| turquoise | ITGA10 |
| turquoise | ITGA2 |
| turquoise | ITGA6 |
| turquoise | ITGA8 |
| turquoise | ITGAX |
| turquoise | ITGB3BP |
| turquoise | ITGB8 |
| turquoise | ITK |
| turquoise | ITLN2 |
| turquoise | IWS1 |
| turquoise | IYD |
| turquoise | JAK3 |
| turquoise | JAM3 |
| turquoise | JPH1 |
| turquoise | JRK |
| turquoise | KBTBD6 |
| turquoise | KBTBD7 |
| turquoise | KCNA5 |
| turquoise | KCNB1 |
| turquoise | KCNC3 |
| turquoise | KCNE2 |
| turquoise | KCNJ5 |
| turquoise | KCNMB1 |
| turquoise | KCNN2 |
| turquoise | KCNS1 |
| turquoise | KCNS2 |
| turquoise | KCNT2 |
| turquoise | KCTD13 |
| turquoise | KCTD18 |
| turquoise | KCTD20 |
| turquoise | KCTD5 |
| turquoise | KCTD7 |
| turquoise | KDELR3 |
| turquoise | KDM3B |
| turquoise | KDM5A |
| turquoise | KDR |
| turquoise | KIAA0232 |
| turquoise | KIAA0513 |
| turquoise | KIAA0753 |
| turquoise | KIAA0895L |
| turquoise | KIF16B |
| turquoise | KIF1A |
| turquoise | KIF20A |
| turquoise | KIF24 |
| turquoise | KIF5A |
| turquoise | KIFC1 |
| turquoise | KIR2DL5A |
| turquoise | KLB |
| turquoise | KLC2 |
| turquoise | KLC3 |
| turquoise | KLF10 |
| turquoise | KLF12 |
| turquoise | KLF5 |
| turquoise | KLHDC1 |
| turquoise | KLHDC10 |
| turquoise | KLHL12 |
| turquoise | KLHL13 |
| turquoise | KLHL2 |
| turquoise | KLHL24 |
| turquoise | KLHL5 |
| turquoise | KLKB1 |
| turquoise | KLRB1 |
| turquoise | KLRC1 |
| turquoise | KLRC4 |
| turquoise | KLRD1 |
| turquoise | KLRF1 |
| turquoise | KMO |
| turquoise | KPNA1 |
| turquoise | KPNA2 |
| turquoise | KPNA3 |
| turquoise | KRI1 |
| turquoise | KRT18 |
| turquoise | KRT222 |
| turquoise | KRT27 |
| turquoise | KRT6B |
| turquoise | KRT73 |
| turquoise | KRT9 |
| turquoise | KRTAP10-1 |
| turquoise | KRTAP23-1 |
| turquoise | KRTAP4-5 |
| turquoise | KRTAP5-6 |
| turquoise | LACTB2 |
| turquoise | LAMA5 |
| turquoise | LAMC2 |
| turquoise | LAP3 |
| turquoise | LAPTM4A |
| turquoise | LAPTM4B |
| turquoise | LARP4 |
| turquoise | LARP4B |
| turquoise | LBX2 |
| turquoise | LDOC1 |
| turquoise | LEFTY1 |
| turquoise | LENG8 |
| turquoise | LEO1 |
| turquoise | LEPR |
| turquoise | LGALS1 |
| turquoise | LGI1 |
| turquoise | LGI3 |
| turquoise | LGI4 |
| turquoise | LIFR |
| turquoise | LILRA3 |
| turquoise | LILRB3 |
| turquoise | LILRB4 |
| turquoise | LIMS1 |
| turquoise | LIN54 |
| turquoise | LIPC |
| turquoise | LIPN |
| turquoise | LLGL2 |
| turquoise | LLPH |
| turquoise | LMAN1 |
| turquoise | LMBRD2 |
| turquoise | LMF1 |
| turquoise | LMOD1 |
| turquoise | LNX2 |
| turquoise | LONRF2 |
| turquoise | LPA |
| turquoise | LPAR5 |
| turquoise | LPCAT2 |
| turquoise | LPGAT1 |
| turquoise | LPIN2 |
| turquoise | LRBA |
| turquoise | LRIG3 |
| turquoise | LRIT3 |
| turquoise | LRP1B |
| turquoise | LRP4 |
| turquoise | LRP5L |
| turquoise | LRRC19 |
| turquoise | LRRC32 |
| turquoise | LRRC3B |
| turquoise | LRRC40 |
| turquoise | LRRC55 |
| turquoise | LRRC58 |
| turquoise | LRRC8E |
| turquoise | LRRFIP1 |
| turquoise | LRRK2 |
| turquoise | LRRTM4 |
| turquoise | LRSAM1 |
| turquoise | LSM11 |
| turquoise | LSM5 |
| turquoise | LTB4R |
| turquoise | LTBP4 |
| turquoise | LTC4S |
| turquoise | LY6G5B |
| turquoise | LYPLA1 |
| turquoise | LYPLAL1 |
| turquoise | LYRM2 |
| turquoise | LYSMD1 |
| turquoise | MAD2L1 |
| turquoise | MAG |
| turquoise | MAGED2 |
| turquoise | MAGEH1 |
| turquoise | MAGT1 |
| turquoise | MALT1 |
| turquoise | MAN1A1 |
| turquoise | MANBA |
| turquoise | MANEA |
| turquoise | MAOB |
| turquoise | MAP2K6 |
| turquoise | MAP4K3 |
| turquoise | MAPK13 |
| turquoise | MAPK8 |
| turquoise | MAPK9 |
| turquoise | MARCO |
| turquoise | MBL2 |
| turquoise | MBNL3 |
| turquoise | MBTPS2 |
| turquoise | MC4R |
| turquoise | MCAM |
| turquoise | MCC |
| turquoise | MCL1 |
| turquoise | MDGA2 |
| turquoise | MDN1 |
| turquoise | ME1 |
| turquoise | MED1 |
| turquoise | MED11 |
| turquoise | MED14 |
| turquoise | MED18 |
| turquoise | MED21 |
| turquoise | MED24 |
| turquoise | MED28 |
| turquoise | MED30 |
| turquoise | MEF2C |
| turquoise | MEGF9 |
| turquoise | MEIS1 |
| turquoise | MEOX2 |
| turquoise | MEP1B |
| turquoise | MEPE |
| turquoise | MERTK |
| turquoise | MEST |
| turquoise | METTL14 |
| turquoise | METTL2B |
| turquoise | MFAP5 |
| turquoise | MFN1 |
| turquoise | MFN2 |
| turquoise | MFSD9 |
| turquoise | MGAT2 |
| turquoise | MGST1 |
| turquoise | MIA3 |
| turquoise | MICALCL |
| turquoise | MIER1 |
| turquoise | MINPP1 |
| turquoise | MKI67 |
| turquoise | MLEC |
| turquoise | MLLT11 |
| turquoise | MLLT6 |
| turquoise | MMAA |
| turquoise | MMADHC |
| turquoise | MMD |
| turquoise | MME |
| turquoise | MMP1 |
| turquoise | MMP19 |
| turquoise | MMP2 |
| turquoise | MMP24 |
| turquoise | MMP3 |
| turquoise | MMP7 |
| turquoise | MMP9 |
| turquoise | MNDA |
| turquoise | MNS1 |
| turquoise | MNT |
| turquoise | MOCOS |
| turquoise | MOCS2 |
| turquoise | MORN2 |
| turquoise | MOSPD1 |
| turquoise | MPHOSPH6 |
| turquoise | MPHOSPH9 |
| turquoise | MPI |
| turquoise | MPP5 |
| turquoise | MPP6 |
| turquoise | MPP7 |
| turquoise | MPPE1 |
| turquoise | MPV17L2 |
| turquoise | MPZL2 |
| turquoise | MPZL3 |
| turquoise | MRAP |
| turquoise | MRAS |
| turquoise | MRO |
| turquoise | MRPL15 |
| turquoise | MRPL17 |
| turquoise | MRPL19 |
| turquoise | MRPL20 |
| turquoise | MRPL23 |
| turquoise | MRPL24 |
| turquoise | MRPL42 |
| turquoise | MRPL47 |
| turquoise | MRPS14 |
| turquoise | MRPS17 |
| turquoise | MRPS22 |
| turquoise | MRPS28 |
| turquoise | MRPS9 |
| turquoise | MS4A6A |
| turquoise | MSC |
| turquoise | MSH2 |
| turquoise | MSI1 |
| turquoise | MSLN |
| turquoise | MSR1 |
| turquoise | MSX1 |
| turquoise | MTA3 |
| turquoise | MTCH2 |
| turquoise | MTF2 |
| turquoise | MTG1 |
| turquoise | MTHFD1L |
| turquoise | MTHFR |
| turquoise | MTM1 |
| turquoise | MTMR11 |
| turquoise | MTMR7 |
| turquoise | MTRF1 |
| turquoise | MUSTN1 |
| turquoise | MX1 |
| turquoise | MX2 |
| turquoise | MYCN |
| turquoise | MYCT1 |
| turquoise | MYH11 |
| turquoise | MYH13 |
| turquoise | MYL9 |
| turquoise | MYO1A |
| turquoise | MYO1E |
| turquoise | MYO5A |
| turquoise | MYO6 |
| turquoise | N4BP2L1 |
| turquoise | N4BP2L2 |
| turquoise | NAALADL1 |
| turquoise | NAALADL2 |
| turquoise | NAP1L1 |
| turquoise | NAP1L3 |
| turquoise | NAPB |
| turquoise | NAPG |
| turquoise | NAT1 |
| turquoise | NAT2 |
| turquoise | NBEA |
| turquoise | NBEAL1 |
| turquoise | NBR1 |
| turquoise | NCAM2 |
| turquoise | NCAPG2 |
| turquoise | NCBP2 |
| turquoise | NCF2 |
| turquoise | NCK1 |
| turquoise | NCL |
| turquoise | NDP |
| turquoise | NDUFA10 |
| turquoise | NDUFA13 |
| turquoise | NDUFA5 |
| turquoise | NDUFAF1 |
| turquoise | NDUFB1 |
| turquoise | NDUFB4 |
| turquoise | NDUFB6 |
| turquoise | NDUFC2 |
| turquoise | NDUFS1 |
| turquoise | NDUFS4 |
| turquoise | NECAB2 |
| turquoise | NECAB3 |
| turquoise | NEIL2 |
| turquoise | NETO2 |
| turquoise | NEUROD2 |
| turquoise | NEUROD4 |
| turquoise | NF1 |
| turquoise | NFE2L3 |
| turquoise | NFIX |
| turquoise | NFKB1 |
| turquoise | NFYB |
| turquoise | NHLRC2 |
| turquoise | NHSL2 |
| turquoise | NIPA1 |
| turquoise | NIPAL1 |
| turquoise | NIT2 |
| turquoise | NKAIN2 |
| turquoise | NKAP |
| turquoise | NKD2 |
| turquoise | NKIRAS1 |
| turquoise | NKRF |
| turquoise | NKX3-1 |
| turquoise | NLN |
| turquoise | NLRP6 |
| turquoise | NMD3 |
| turquoise | NME7 |
| turquoise | NMI |
| turquoise | NMNAT1 |
| turquoise | NMT1 |
| turquoise | NNT |
| turquoise | NOC3L |
| turquoise | NOD2 |
| turquoise | NOS1AP |
| turquoise | NOS3 |
| turquoise | NOTCH3 |
| turquoise | NPL |
| turquoise | NR5A1 |
| turquoise | NRAS |
| turquoise | NRBF2 |
| turquoise | NRCAM |
| turquoise | NRG4 |
| turquoise | NRGN |
| turquoise | NRIP1 |
| turquoise | NRIP3 |
| turquoise | NRSN2 |
| turquoise | NRTN |
| turquoise | NRXN2 |
| turquoise | NSDHL |
| turquoise | NSMCE2 |
| turquoise | NSUN3 |
| turquoise | NSUN4 |
| turquoise | NSUN6 |
| turquoise | NT5E |
| turquoise | NT5M |
| turquoise | NTAN1 |
| turquoise | NUAK2 |
| turquoise | NUCB2 |
| turquoise | NUDCD2 |
| turquoise | NUDT12 |
| turquoise | NUDT13 |
| turquoise | NUDT16 |
| turquoise | NUDT18 |
| turquoise | NUDT5 |
| turquoise | NUDT7 |
| turquoise | NUP107 |
| turquoise | NUP35 |
| turquoise | NUP54 |
| turquoise | NUP62CL |
| turquoise | NUP93 |
| turquoise | NUSAP1 |
| turquoise | NXF1 |
| turquoise | NXN |
| turquoise | NXNL2 |
| turquoise | NYNRIN |
| turquoise | OAS1 |
| turquoise | OAS2 |
| turquoise | OAS3 |
| turquoise | OASL |
| turquoise | OAT |
| turquoise | OAZ2 |
| turquoise | OCIAD2 |
| turquoise | ODC1 |
| turquoise | ODF2L |
| turquoise | OGFRL1 |
| turquoise | OLFML2A |
| turquoise | OLFML2B |
| turquoise | OR2A42 |
| turquoise | OR2A7 |
| turquoise | OR2M4 |
| turquoise | OR4D1 |
| turquoise | OR4P4 |
| turquoise | OR51I1 |
| turquoise | OR5M10 |
| turquoise | OR5M8 |
| turquoise | OR7D2 |
| turquoise | ORAI1 |
| turquoise | ORMDL1 |
| turquoise | OSBPL5 |
| turquoise | OSBPL7 |
| turquoise | OSGEPL1 |
| turquoise | OSGIN2 |
| turquoise | OTOA |
| turquoise | OXCT2 |
| turquoise | P2RY12 |
| turquoise | P2RY8 |
| turquoise | P4HA2 |
| turquoise | PACS1 |
| turquoise | PAIP1 |
| turquoise | PALB2 |
| turquoise | PAN3 |
| turquoise | PANK1 |
| turquoise | PANK3 |
| turquoise | PAPLN |
| turquoise | PAPPA |
| turquoise | PAPSS2 |
| turquoise | PAQR8 |
| turquoise | PARD6B |
| turquoise | PARP1 |
| turquoise | PARP14 |
| turquoise | PARP9 |
| turquoise | PARVB |
| turquoise | PARVG |
| turquoise | PAXIP1 |
| turquoise | PBK |
| turquoise | PBLD |
| turquoise | PCDHB12 |
| turquoise | PCDHB5 |
| turquoise | PCGF6 |
| turquoise | PCOLCE |
| turquoise | PCSK6 |
| turquoise | PCTP |
| turquoise | PCYOX1 |
| turquoise | PDCD1LG2 |
| turquoise | PDE11A |
| turquoise | PDE6B |
| turquoise | PDGFB |
| turquoise | PDGFC |
| turquoise | PDHA1 |
| turquoise | PDIA3 |
| turquoise | PDIA4 |
| turquoise | PDIA5 |
| turquoise | PDIA6 |
| turquoise | PDIK1L |
| turquoise | PDK4 |
| turquoise | PDLIM1 |
| turquoise | PDLIM3 |
| turquoise | PDPR |
| turquoise | PDSS1 |
| turquoise | PDYN |
| turquoise | PDZK1 |
| turquoise | PEBP4 |
| turquoise | PEX1 |
| turquoise | PEX11A |
| turquoise | PEX12 |
| turquoise | PEX3 |
| turquoise | PEX7 |
| turquoise | PFDN6 |
| turquoise | PFKP |
| turquoise | PFN2 |
| turquoise | PGBD1 |
| turquoise | PGBD5 |
| turquoise | PGD |
| turquoise | PGGT1B |
| turquoise | PGK1 |
| turquoise | PHB |
| turquoise | PHC3 |
| turquoise | PHF10 |
| turquoise | PHF20 |
| turquoise | PHLDB1 |
| turquoise | PHOSPHO2 |
| turquoise | PHYH |
| turquoise | PHYHIPL |
| turquoise | PI16 |
| turquoise | PI4KA |
| turquoise | PIGB |
| turquoise | PIGC |
| turquoise | PIGK |
| turquoise | PIGR |
| turquoise | PIGZ |
| turquoise | PIK3AP1 |
| turquoise | PIK3C2A |
| turquoise | PIK3C2B |
| turquoise | PIK3C2G |
| turquoise | PIK3R1 |
| turquoise | PIK3R4 |
| turquoise | PILRB |
| turquoise | PIN4 |
| turquoise | PIP5K1A |
| turquoise | PIP5K1C |
| turquoise | PIR |
| turquoise | PITPNB |
| turquoise | PITRM1 |
| turquoise | PKN3 |
| turquoise | PLA1A |
| turquoise | PLA2G12A |
| turquoise | PLA2G7 |
| turquoise | PLAC8 |
| turquoise | PLAT |
| turquoise | PLAU |
| turquoise | PLAUR |
| turquoise | PLCXD1 |
| turquoise | PLD1 |
| turquoise | PLEKHA3 |
| turquoise | PLEKHB1 |
| turquoise | PLEKHG3 |
| turquoise | PLEKHO2 |
| turquoise | PLIN2 |
| turquoise | PLK2 |
| turquoise | PLOD3 |
| turquoise | PLS3 |
| turquoise | PLSCR4 |
| turquoise | PLXNA3 |
| turquoise | PM20D2 |
| turquoise | PMP2 |
| turquoise | PMS1 |
| turquoise | PNMA2 |
| turquoise | PNN |
| turquoise | PNPLA4 |
| turquoise | PNRC2 |
| turquoise | POLA1 |
| turquoise | POLD3 |
| turquoise | POLE2 |
| turquoise | POLG2 |
| turquoise | POLK |
| turquoise | POLR2B |
| turquoise | POLR2E |
| turquoise | POLR2K |
| turquoise | POLR3F |
| turquoise | POMP |
| turquoise | POMT2 |
| turquoise | POP4 |
| turquoise | POSTN |
| turquoise | POU2AF1 |
| turquoise | POU6F2 |
| turquoise | PPCDC |
| turquoise | PPIH |
| turquoise | PPIL1 |
| turquoise | PPIL6 |
| turquoise | PPM1D |
| turquoise | PPM1K |
| turquoise | PPP1R12A |
| turquoise | PPP1R14A |
| turquoise | PPP1R16B |
| turquoise | PPP1R7 |
| turquoise | PPP2R1B |
| turquoise | PPP3CA |
| turquoise | PPP3R1 |
| turquoise | PPP4R1 |
| turquoise | PPP4R4 |
| turquoise | PRB4 |
| turquoise | PRELP |
| turquoise | PRKAA1 |
| turquoise | PRKAA2 |
| turquoise | PRKAB2 |
| turquoise | PRKACB |
| turquoise | PRKAG1 |
| turquoise | PRKAR2A |
| turquoise | PRLR |
| turquoise | PRMT3 |
| turquoise | PRPF18 |
| turquoise | PRPF39 |
| turquoise | PRPSAP2 |
| turquoise | PRR11 |
| turquoise | PRRX1 |
| turquoise | PRSS23 |
| turquoise | PRSS3 |
| turquoise | PSAT1 |
| turquoise | PSD3 |
| turquoise | PSG9 |
| turquoise | PSMA2 |
| turquoise | PSMA3 |
| turquoise | PSMA4 |
| turquoise | PSMB7 |
| turquoise | PSMB9 |
| turquoise | PSMC4 |
| turquoise | PSMD10 |
| turquoise | PSMD2 |
| turquoise | PSMD8 |
| turquoise | PSMF1 |
| turquoise | PSRC1 |
| turquoise | PTCD2 |
| turquoise | PTCH2 |
| turquoise | PTER |
| turquoise | PTGER2 |
| turquoise | PTGR2 |
| turquoise | PTH2R |
| turquoise | PTPN11 |
| turquoise | PTPN12 |
| turquoise | PTPN3 |
| turquoise | PTPN4 |
| turquoise | PTPRC |
| turquoise | PTPRD |
| turquoise | PTPRJ |
| turquoise | PTS |
| turquoise | PTTG1 |
| turquoise | PUS10 |
| turquoise | PUS3 |
| turquoise | PYGM |
| turquoise | PYROXD1 |
| turquoise | PZP |
| turquoise | QPCTL |
| turquoise | QRSL1 |
| turquoise | R3HDM2 |
| turquoise | RAB14 |
| turquoise | RAB18 |
| turquoise | RAB25 |
| turquoise | RAB2A |
| turquoise | RAB33B |
| turquoise | RAB36 |
| turquoise | RAB38 |
| turquoise | RAB9B |
| turquoise | RABGAP1L |
| turquoise | RABGEF1 |
| turquoise | RABGGTB |
| turquoise | RABIF |
| turquoise | RABL3 |
| turquoise | RAD51AP1 |
| turquoise | RAD9A |
| turquoise | RALGAPB |
| turquoise | RALGPS2 |
| turquoise | RANBP3L |
| turquoise | RANBP6 |
| turquoise | RANBP9 |
| turquoise | RAP1GDS1 |
| turquoise | RAPGEF4 |
| turquoise | RASA4 |
| turquoise | RASGRP4 |
| turquoise | RASIP1 |
| turquoise | RASSF2 |
| turquoise | RBBP6 |
| turquoise | RBBP7 |
| turquoise | RBKS |
| turquoise | RBM7 |
| turquoise | RBM8A |
| turquoise | RBMX2 |
| turquoise | RCAN1 |
| turquoise | RCAN3 |
| turquoise | RCOR1 |
| turquoise | RDH11 |
| turquoise | RDH12 |
| turquoise | RDH13 |
| turquoise | RDH5 |
| turquoise | REC8 |
| turquoise | REEP1 |
| turquoise | REEP3 |
| turquoise | REG3G |
| turquoise | RELN |
| turquoise | REM1 |
| turquoise | REPS1 |
| turquoise | REPS2 |
| turquoise | RERGL |
| turquoise | RETSAT |
| turquoise | RFC1 |
| turquoise | RFK |
| turquoise | RFTN2 |
| turquoise | RFX2 |
| turquoise | RFX7 |
| turquoise | RFXAP |
| turquoise | RGN |
| turquoise | RGS16 |
| turquoise | RGS18 |
| turquoise | RGS4 |
| turquoise | RGS7 |
| turquoise | RHBDD2 |
| turquoise | RHBDF1 |
| turquoise | RHD |
| turquoise | RHOBTB3 |
| turquoise | RICTOR |
| turquoise | RIMBP3 |
| turquoise | RIN3 |
| turquoise | RIOK2 |
| turquoise | RIPK1 |
| turquoise | RIPPLY1 |
| turquoise | RLF |
| turquoise | RMND1 |
| turquoise | RMND5A |
| turquoise | RNASEL |
| turquoise | RNF125 |
| turquoise | RNF128 |
| turquoise | RNF130 |
| turquoise | RNF138 |
| turquoise | RNF141 |
| turquoise | RNF149 |
| turquoise | RNF165 |
| turquoise | RNF170 |
| turquoise | RNF180 |
| turquoise | RNF19A |
| turquoise | RNF39 |
| turquoise | RNF5 |
| turquoise | RNFT1 |
| turquoise | RNU11 |
| turquoise | RNU4ATAC |
| turquoise | ROBO2 |
| turquoise | RORA |
| turquoise | RPAP3 |
| turquoise | RPF1 |
| turquoise | RPH3AL |
| turquoise | RPL13 |
| turquoise | RPL23A |
| turquoise | RPL29 |
| turquoise | RPL35 |
| turquoise | RPL37 |
| turquoise | RPL7 |
| turquoise | RPL7A |
| turquoise | RPL8 |
| turquoise | RPS21 |
| turquoise | RPS26 |
| turquoise | RPS27A |
| turquoise | RPS4Y2 |
| turquoise | RPS6KA3 |
| turquoise | RPS6KB1 |
| turquoise | RPS7 |
| turquoise | RPS8 |
| turquoise | RPSA |
| turquoise | RRN3 |
| turquoise | RSAD2 |
| turquoise | RSF1 |
| turquoise | RSRC1 |
| turquoise | RTN1 |
| turquoise | RTP4 |
| turquoise | RUVBL1 |
| turquoise | RUVBL2 |
| turquoise | RWDD2B |
| turquoise | S1PR5 |
| turquoise | SACM1L |
| turquoise | SACS |
| turquoise | SALL2 |
| turquoise | SALL4 |
| turquoise | SAMD3 |
| turquoise | SAMD9 |
| turquoise | SAMD9L |
| turquoise | SAMHD1 |
| turquoise | SAV1 |
| turquoise | SBF1 |
| turquoise | SCAMP5 |
| turquoise | SCARA5 |
| turquoise | SCARF1 |
| turquoise | SCARNA4 |
| turquoise | SCCPDH |
| turquoise | SCD5 |
| turquoise | SCFD1 |
| turquoise | SCGN |
| turquoise | SCML1 |
| turquoise | SCN3B |
| turquoise | SCN9A |
| turquoise | SCPEP1 |
| turquoise | SCUBE2 |
| turquoise | SDCCAG8 |
| turquoise | SDS |
| turquoise | SEC11A |
| turquoise | SEC11C |
| turquoise | SEC13 |
| turquoise | SEC22B |
| turquoise | SEC23A |
| turquoise | SEC24B |
| turquoise | SEC24D |
| turquoise | SEC61A2 |
| turquoise | SEC61G |
| turquoise | SEC62 |
| turquoise | SELE |
| turquoise | SELENBP1 |
| turquoise | SELP |
| turquoise | SEMA3B |
| turquoise | SEMA4F |
| turquoise | SEMA6C |
| turquoise | SERBP1 |
| turquoise | SERP2 |
| turquoise | SERPINA10 |
| turquoise | SERPINA12 |
| turquoise | SERPINA4 |
| turquoise | SERPINA5 |
| turquoise | SERPINB2 |
| turquoise | SERTAD4 |
| turquoise | SESN1 |
| turquoise | SESN3 |
| turquoise | SETD7 |
| turquoise | SF3B3 |
| turquoise | SFPQ |
| turquoise | SFRP1 |
| turquoise | SFXN1 |
| turquoise | SFXN2 |
| turquoise | SGCA |
| turquoise | SGCB |
| turquoise | SGPP1 |
| turquoise | SGTB |
| turquoise | SH2D1A |
| turquoise | SH2D3A |
| turquoise | SH2D4A |
| turquoise | SH3BGRL |
| turquoise | SH3GL2 |
| turquoise | SH3PXD2A |
| turquoise | SH3TC1 |
| turquoise | SHBG |
| turquoise | SHC4 |
| turquoise | SHROOM2 |
| turquoise | SIGLEC10 |
| turquoise | SIGLEC5 |
| turquoise | SIGLEC6 |
| turquoise | SIM1 |
| turquoise | SIN3B |
| turquoise | SIRT6 |
| turquoise | SKA2 |
| turquoise | SKAP2 |
| turquoise | SKIL |
| turquoise | SKP1 |
| turquoise | SKP2 |
| turquoise | SLAMF1 |
| turquoise | SLAMF8 |
| turquoise | SLC10A3 |
| turquoise | SLC10A5 |
| turquoise | SLC13A2 |
| turquoise | SLC13A3 |
| turquoise | SLC15A1 |
| turquoise | SLC16A1 |
| turquoise | SLC16A11 |
| turquoise | SLC16A14 |
| turquoise | SLC16A4 |
| turquoise | SLC17A1 |
| turquoise | SLC17A3 |
| turquoise | SLC17A5 |
| turquoise | SLC19A2 |
| turquoise | SLC1A1 |
| turquoise | SLC1A2 |
| turquoise | SLC22A10 |
| turquoise | SLC22A15 |
| turquoise | SLC22A16 |
| turquoise | SLC22A23 |
| turquoise | SLC22A9 |
| turquoise | SLC24A4 |
| turquoise | SLC25A15 |
| turquoise | SLC25A16 |
| turquoise | SLC25A19 |
| turquoise | SLC25A2 |
| turquoise | SLC25A20 |
| turquoise | SLC25A26 |
| turquoise | SLC25A29 |
| turquoise | SLC25A30 |
| turquoise | SLC25A33 |
| turquoise | SLC25A35 |
| turquoise | SLC25A40 |
| turquoise | SLC27A1 |
| turquoise | SLC27A2 |
| turquoise | SLC29A4 |
| turquoise | SLC2A6 |
| turquoise | SLC2A9 |
| turquoise | SLC30A5 |
| turquoise | SLC31A1 |
| turquoise | SLC31A2 |
| turquoise | SLC35A3 |
| turquoise | SLC35A5 |
| turquoise | SLC35B3 |
| turquoise | SLC35D1 |
| turquoise | SLC35F1 |
| turquoise | SLC36A4 |
| turquoise | SLC38A6 |
| turquoise | SLC39A11 |
| turquoise | SLC39A8 |
| turquoise | SLC39A9 |
| turquoise | SLC41A2 |
| turquoise | SLC44A4 |
| turquoise | SLC44A5 |
| turquoise | SLC4A7 |
| turquoise | SLC5A3 |
| turquoise | SLC5A4 |
| turquoise | SLC6A16 |
| turquoise | SLC6A6 |
| turquoise | SLC7A14 |
| turquoise | SLC7A5 |
| turquoise | SLC9A1 |
| turquoise | SLC9A9 |
| turquoise | SLCO1B1 |
| turquoise | SLCO1B3 |
| turquoise | SLCO2A1 |
| turquoise | SLCO4C1 |
| turquoise | SLFN5 |
| turquoise | SLITRK6 |
| turquoise | SLPI |
| turquoise | SLTM |
| turquoise | SMAD1 |
| turquoise | SMARCAD1 |
| turquoise | SMC2 |
| turquoise | SMC4 |
| turquoise | SMC5 |
| turquoise | SMC6 |
| turquoise | SMPD2 |
| turquoise | SMU1 |
| turquoise | SMURF2 |
| turquoise | SMYD2 |
| turquoise | SNAI3 |
| turquoise | SNAPC3 |
| turquoise | SNAPC4 |
| turquoise | SNAPIN |
| turquoise | SNCAIP |
| turquoise | SNORA37 |
| turquoise | SNORA55 |
| turquoise | SNORA60 |
| turquoise | SNORA71A |
| turquoise | SNORA71C |
| turquoise | SNRPA1 |
| turquoise | SNRPD1 |
| turquoise | SNRPD3 |
| turquoise | SNRPE |
| turquoise | SNRPF |
| turquoise | SNTG1 |
| turquoise | SNW1 |
| turquoise | SNX10 |
| turquoise | SNX14 |
| turquoise | SNX24 |
| turquoise | SOAT1 |
| turquoise | SOCS6 |
| turquoise | SOD3 |
| turquoise | SORL1 |
| turquoise | SORT1 |
| turquoise | SOS1 |
| turquoise | SOS2 |
| turquoise | SOX1 |
| turquoise | SOX15 |
| turquoise | SOX17 |
| turquoise | SOX4 |
| turquoise | SOX8 |
| turquoise | SPAG5 |
| turquoise | SPATA13 |
| turquoise | SPATA5L1 |
| turquoise | SPATS1 |
| turquoise | SPATS2L |
| turquoise | SPC24 |
| turquoise | SPCS2 |
| turquoise | SPCS3 |
| turquoise | SPIC |
| turquoise | SPINK5 |
| turquoise | SPON1 |
| turquoise | SPON2 |
| turquoise | SPTBN5 |
| turquoise | SPTLC2 |
| turquoise | SPTLC3 |
| turquoise | SQLE |
| turquoise | SRD5A2 |
| turquoise | SRGAP1 |
| turquoise | SRPRB |
| turquoise | SSB |
| turquoise | SSBP2 |
| turquoise | SSR1 |
| turquoise | SSR3 |
| turquoise | SSX2IP |
| turquoise | ST14 |
| turquoise | ST3GAL2 |
| turquoise | ST3GAL5 |
| turquoise | ST3GAL6 |
| turquoise | ST8SIA1 |
| turquoise | STAG1 |
| turquoise | STARD4 |
| turquoise | STBD1 |
| turquoise | STK33 |
| turquoise | STOX2 |
| turquoise | STRN3 |
| turquoise | STX17 |
| turquoise | STX8 |
| turquoise | STXBP1 |
| turquoise | STXBP3 |
| turquoise | STYXL1 |
| turquoise | SUCLA2 |
| turquoise | SUCLG2 |
| turquoise | SUCNR1 |
| turquoise | SUDS3 |
| turquoise | SULT1A2 |
| turquoise | SULT1B1 |
| turquoise | SULT1E1 |
| turquoise | SULT2A1 |
| turquoise | SUMO1 |
| turquoise | SUPT7L |
| turquoise | SUPV3L1 |
| turquoise | SURF4 |
| turquoise | SUV39H1 |
| turquoise | SV2A |
| turquoise | SV2B |
| turquoise | SVIP |
| turquoise | SYNC |
| turquoise | SYT17 |
| turquoise | TAC1 |
| turquoise | TACSTD2 |
| turquoise | TAF12 |
| turquoise | TAF13 |
| turquoise | TAF2 |
| turquoise | TAGLN |
| turquoise | TALDO1 |
| turquoise | TAPBPL |
| turquoise | TARBP1 |
| turquoise | TARS2 |
| turquoise | TAS2R43 |
| turquoise | TASP1 |
| turquoise | TAT |
| turquoise | TATDN1 |
| turquoise | TBC1D19 |
| turquoise | TBC1D22B |
| turquoise | TBC1D7 |
| turquoise | TBC1D8B |
| turquoise | TBCCD1 |
| turquoise | TBCE |
| turquoise | TBCEL |
| turquoise | TBL1XR1 |
| turquoise | TC2N |
| turquoise | TCF21 |
| turquoise | TCN1 |
| turquoise | TCP11 |
| turquoise | TDO2 |
| turquoise | TDRD3 |
| turquoise | TDRD7 |
| turquoise | TECPR1 |
| turquoise | TES |
| turquoise | TEX261 |
| turquoise | TFB1M |
| turquoise | TFB2M |
| turquoise | TFEC |
| turquoise | TFRC |
| turquoise | TGDS |
| turquoise | TGFA |
| turquoise | TGFB1 |
| turquoise | TGFBR1 |
| turquoise | TGM3 |
| turquoise | THAP2 |
| turquoise | THAP5 |
| turquoise | THAP6 |
| turquoise | THBS3 |
| turquoise | THG1L |
| turquoise | THNSL1 |
| turquoise | THOC2 |
| turquoise | THOC3 |
| turquoise | THOP1 |
| turquoise | THRAP3 |
| turquoise | TIMD4 |
| turquoise | TIMM17A |
| turquoise | TIMM8A |
| turquoise | TIMM8B |
| turquoise | TINAGL1 |
| turquoise | TIPRL |
| turquoise | TJP2 |
| turquoise | TLCD1 |
| turquoise | TLE2 |
| turquoise | TLK2 |
| turquoise | TLL1 |
| turquoise | TLR1 |
| turquoise | TLR4 |
| turquoise | TLR8 |
| turquoise | TM9SF3 |
| turquoise | TMC6 |
| turquoise | TMCC1 |
| turquoise | TMED10 |
| turquoise | TMEM106A |
| turquoise | TMEM106C |
| turquoise | TMEM119 |
| turquoise | TMEM140 |
| turquoise | TMEM144 |
| turquoise | TMEM14A |
| turquoise | TMEM154 |
| turquoise | TMEM156 |
| turquoise | TMEM158 |
| turquoise | TMEM161A |
| turquoise | TMEM161B |
| turquoise | TMEM167A |
| turquoise | TMEM170A |
| turquoise | TMEM176A |
| turquoise | TMEM182 |
| turquoise | TMEM183B |
| turquoise | TMEM184C |
| turquoise | TMEM186 |
| turquoise | TMEM187 |
| turquoise | TMEM19 |
| turquoise | TMEM192 |
| turquoise | TMEM201 |
| turquoise | TMEM208 |
| turquoise | TMEM218 |
| turquoise | TMEM220 |
| turquoise | TMEM229B |
| turquoise | TMEM231 |
| turquoise | TMEM26 |
| turquoise | TMEM30A |
| turquoise | TMEM31 |
| turquoise | TMEM41A |
| turquoise | TMEM45A |
| turquoise | TMEM45B |
| turquoise | TMEM47 |
| turquoise | TMEM50A |
| turquoise | TMEM61 |
| turquoise | TMEM65 |
| turquoise | TMEM74 |
| turquoise | TMEM99 |
| turquoise | TMLHE |
| turquoise | TMOD4 |
| turquoise | TMPO |
| turquoise | TMPRSS9 |
| turquoise | TMSB4X |
| turquoise | TMTC4 |
| turquoise | TNFAIP2 |
| turquoise | TNFSF10 |
| turquoise | TNKS |
| turquoise | TNN |
| turquoise | TNNC2 |
| turquoise | TNNI2 |
| turquoise | TNNT3 |
| turquoise | TNXB |
| turquoise | TOB1 |
| turquoise | TOM1L1 |
| turquoise | TOMM34 |
| turquoise | TOR1B |
| turquoise | TOX4 |
| turquoise | TP53RK |
| turquoise | TPBG |
| turquoise | TPCN1 |
| turquoise | TPD52 |
| turquoise | TPM2 |
| turquoise | TPP2 |
| turquoise | TPRG1 |
| turquoise | TPRKB |
| turquoise | TPSAB1 |
| turquoise | TPSG1 |
| turquoise | TRAFD1 |
| turquoise | TRAPPC4 |
| turquoise | TRAPPC6B |
| turquoise | TRIAP1 |
| turquoise | TRIB2 |
| turquoise | TRIL |
| turquoise | TRIM14 |
| turquoise | TRIM22 |
| turquoise | TRIM24 |
| turquoise | TRIM5 |
| turquoise | TRIM55 |
| turquoise | TRIML2 |
| turquoise | TRIP11 |
| turquoise | TRIT1 |
| turquoise | TRMT5 |
| turquoise | TRMT6 |
| turquoise | TRPM7 |
| turquoise | TRPM8 |
| turquoise | TRUB1 |
| turquoise | TRUB2 |
| turquoise | TSC22D3 |
| turquoise | TSFM |
| turquoise | TSHZ2 |
| turquoise | TSPAN12 |
| turquoise | TSPAN6 |
| turquoise | TSPAN8 |
| turquoise | TSPYL4 |
| turquoise | TSSK4 |
| turquoise | TTBK1 |
| turquoise | TTC1 |
| turquoise | TTC30B |
| turquoise | TTC32 |
| turquoise | TTC6 |
| turquoise | TTC8 |
| turquoise | TTPA |
| turquoise | TTPAL |
| turquoise | TUBB2A |
| turquoise | TUBB2B |
| turquoise | TUBE1 |
| turquoise | TUBG2 |
| turquoise | TUBGCP3 |
| turquoise | TUFT1 |
| turquoise | TWF1 |
| turquoise | TWIST1 |
| turquoise | TWSG1 |
| turquoise | TXLNA |
| turquoise | TXNDC12 |
| turquoise | TXNDC17 |
| turquoise | TXNL4B |
| turquoise | TYMS |
| turquoise | TYRO3 |
| turquoise | TYW3 |
| turquoise | UAP1 |
| turquoise | UAP1L1 |
| turquoise | UBA3 |
| turquoise | UBA6 |
| turquoise | UBASH3A |
| turquoise | UBD |
| turquoise | UBE2D1 |
| turquoise | UBE2N |
| turquoise | UBE2Q2 |
| turquoise | UBL5 |
| turquoise | UBR3 |
| turquoise | UBTD1 |
| turquoise | UEVLD |
| turquoise | UGDH |
| turquoise | UGT2A3 |
| turquoise | UGT2B15 |
| turquoise | UGT2B4 |
| turquoise | UGT2B7 |
| turquoise | UGT3A1 |
| turquoise | UHRF2 |
| turquoise | ULK1 |
| turquoise | UNC93A |
| turquoise | UPF3B |
| turquoise | UPK3B |
| turquoise | UPP2 |
| turquoise | UQCRC2 |
| turquoise | USE1 |
| turquoise | USP15 |
| turquoise | USP18 |
| turquoise | USP25 |
| turquoise | USP28 |
| turquoise | USP30 |
| turquoise | USP32 |
| turquoise | USP6NL |
| turquoise | USP7 |
| turquoise | UST |
| turquoise | UTP14A |
| turquoise | UTP18 |
| turquoise | UTP20 |
| turquoise | UTP23 |
| turquoise | UVRAG |
| turquoise | VAMP8 |
| turquoise | VANGL2 |
| turquoise | VAPA |
| turquoise | VASH1 |
| turquoise | VAV3 |
| turquoise | VCAM1 |
| turquoise | VCPIP1 |
| turquoise | VEGFC |
| turquoise | VIPR1 |
| turquoise | VNN1 |
| turquoise | VPS25 |
| turquoise | VPS26A |
| turquoise | VPS37A |
| turquoise | VPS37B |
| turquoise | VPS8 |
| turquoise | VRK1 |
| turquoise | VSIG4 |
| turquoise | VSNL1 |
| turquoise | VSTM2L |
| turquoise | VTA1 |
| turquoise | VTI1B |
| turquoise | VWCE |
| turquoise | VWF |
| turquoise | WARS2 |
| turquoise | WBP4 |
| turquoise | WDFY2 |
| turquoise | WDR25 |
| turquoise | WDR3 |
| turquoise | WDR31 |
| turquoise | WDR41 |
| turquoise | WDR44 |
| turquoise | WDR53 |
| turquoise | WDR72 |
| turquoise | WDR76 |
| turquoise | WEE1 |
| turquoise | WIPI1 |
| turquoise | WNK3 |
| turquoise | WNT7B |
| turquoise | WSB1 |
| turquoise | WWC2 |
| turquoise | XAF1 |
| turquoise | XDH |
| turquoise | XK |
| turquoise | XKR4 |
| turquoise | XKR9 |
| turquoise | XPA |
| turquoise | XRCC5 |
| turquoise | XRN2 |
| turquoise | YARS2 |
| turquoise | YIPF1 |
| turquoise | YIPF4 |
| turquoise | YME1L1 |
| turquoise | YTHDF3 |
| turquoise | YWHAE |
| turquoise | YWHAG |
| turquoise | ZBTB1 |
| turquoise | ZBTB11 |
| turquoise | ZBTB16 |
| turquoise | ZBTB41 |
| turquoise | ZBTB7C |
| turquoise | ZBTB9 |
| turquoise | ZC3H11A |
| turquoise | ZC3H12D |
| turquoise | ZC3H13 |
| turquoise | ZC3H15 |
| turquoise | ZC3H8 |
| turquoise | ZCCHC14 |
| turquoise | ZCCHC2 |
| turquoise | ZCRB1 |
| turquoise | ZDHHC2 |
| turquoise | ZFAND1 |
| turquoise | ZFAND6 |
| turquoise | ZFP1 |
| turquoise | ZFP3 |
| turquoise | ZFP36L2 |
| turquoise | ZFP62 |
| turquoise | ZFX |
| turquoise | ZFYVE16 |
| turquoise | ZHX3 |
| turquoise | ZKSCAN1 |
| turquoise | ZMPSTE24 |
| turquoise | ZNF117 |
| turquoise | ZNF12 |
| turquoise | ZNF124 |
| turquoise | ZNF135 |
| turquoise | ZNF140 |
| turquoise | ZNF141 |
| turquoise | ZNF146 |
| turquoise | ZNF177 |
| turquoise | ZNF181 |
| turquoise | ZNF212 |
| turquoise | ZNF222 |
| turquoise | ZNF227 |
| turquoise | ZNF239 |
| turquoise | ZNF248 |
| turquoise | ZNF253 |
| turquoise | ZNF254 |
| turquoise | ZNF256 |
| turquoise | ZNF28 |
| turquoise | ZNF284 |
| turquoise | ZNF300 |
| turquoise | ZNF33A |
| turquoise | ZNF33B |
| turquoise | ZNF341 |
| turquoise | ZNF354B |
| turquoise | ZNF358 |
| turquoise | ZNF385A |
| turquoise | ZNF394 |
| turquoise | ZNF420 |
| turquoise | ZNF429 |
| turquoise | ZNF462 |
| turquoise | ZNF467 |
| turquoise | ZNF480 |
| turquoise | ZNF484 |
| turquoise | ZNF507 |
| turquoise | ZNF518A |
| turquoise | ZNF550 |
| turquoise | ZNF552 |
| turquoise | ZNF555 |
| turquoise | ZNF558 |
| turquoise | ZNF566 |
| turquoise | ZNF571 |
| turquoise | ZNF573 |
| turquoise | ZNF589 |
| turquoise | ZNF608 |
| turquoise | ZNF626 |
| turquoise | ZNF638 |
| turquoise | ZNF654 |
| turquoise | ZNF658 |
| turquoise | ZNF670 |
| turquoise | ZNF671 |
| turquoise | ZNF675 |
| turquoise | ZNF677 |
| turquoise | ZNF721 |
| turquoise | ZNF740 |
| turquoise | ZNF75D |
| turquoise | ZNF764 |
| turquoise | ZNF77 |
| turquoise | ZNF770 |
| turquoise | ZNF775 |
| turquoise | ZNF780B |
| turquoise | ZNF791 |
| turquoise | ZNF800 |
| turquoise | ZNF823 |
| turquoise | ZNF83 |
| turquoise | ZNF830 |
| turquoise | ZNF845 |
| turquoise | ZNF91 |
| turquoise | ZNHIT3 |
| turquoise | ZRANB3 |
| turquoise | ZSWIM4 |
| turquoise | ZXDA |
