# Supplementary material for: Identification of Fatty acid metabolism-Related Genes in the Progression from Non-Alcoholic Fatty Liver to Nonalcoholic fatty liver disease
Source: Research Square preprint supplement (doi:10.21203/rs.3.rs-5030401/v1), 2024-10-21
Supplement: Supplementary file 6 [file 2e03d324da71ac7283b4efc4.docx]

**Table S10. Differential gene results of cluster B versus cluster A.**

| Genes | LogFC | P.Value | Adj.P.Val |
| --- | --- | --- | --- |
| **Upregulated** |  |  |  |
| CYP2C19 | 3.433526438 | 1.99E-22 | 4.31E-18 |
| FAM151A | 1.721420683 | 1.22E-07 | 0.000660399 |
| CYP1A2 | 1.058759429 | 7.92E-05 | 0.029567119 |
| OAT | 1.03596193 | 1.24E-05 | 0.012797106 |
| MT1M | 1.017273252 | 0.009958334 | 0.229401885 |
| KANK4 | 0.95077217 | 0.000179699 | 0.040794773 |
| C5orf27 | 0.949145149 | 0.018144281 | 0.287015247 |
| GLUL | 0.828944963 | 1.94E-07 | 0.00084004 |
| AOC1 | 0.823579571 | 0.000105975 | 0.032410735 |
| PLIN1 | 0.817220615 | 0.001068189 | 0.085794892 |
| DHRS2 | 0.809669559 | 0.004504088 | 0.16015028 |
| EFHD1 | 0.805849394 | 0.004926595 | 0.165396108 |
| SLC16A4 | 0.78358417 | 0.000815567 | 0.080640556 |
| THOP1 | 0.750889762 | 0.000107299 | 0.032410735 |
| CNDP1 | 0.666612207 | 0.011622866 | 0.242234401 |
| SLC16A10 | 0.666431821 | 0.000141802 | 0.036554655 |
| MME | 0.656524012 | 5.43E-05 | 0.025845985 |
| PCOLCE2 | 0.643281993 | 0.002988278 | 0.133418914 |
| KCNN2 | 0.629111387 | 0.001402005 | 0.096766638 |
| C19orf80 | 0.624514732 | 0.004499972 | 0.16015028 |
| MT1F | 0.617033054 | 0.013389962 | 0.258668542 |
| NAGS | 0.61014162 | 3.12E-06 | 0.007512621 |
| HSD17B14 | 0.600012559 | 6.74E-05 | 0.027554902 |
| DNMT3L | 0.599114925 | 0.009623766 | 0.226187238 |
| GSTZ1 | 0.582801641 | 4.45E-05 | 0.022959894 |
| SLCO1B3 | 0.576725503 | 0.000660137 | 0.075799666 |
| SLC13A5 | 0.574364702 | 1.88E-05 | 0.014546727 |
| LOC102723845 | 0.572731681 | 0.004759148 | 0.16306869 |
| PCOLCE | 0.572022455 | 0.001792506 | 0.107888966 |
| PKLR | 0.564969172 | 0.000120066 | 0.032861002 |
| GCDH | 0.555051503 | 0.00011342 | 0.032746569 |
| LOC100130232 | 0.549963403 | 0.026783548 | 0.332552148 |
| PKD2 | 0.547749604 | 0.003212505 | 0.138572857 |
| OSGIN1 | 0.54129665 | 0.002856664 | 0.132999488 |
| NYNRIN | 0.53006876 | 0.021221128 | 0.300779846 |
| CUX2 | 0.521048096 | 0.00799051 | 0.204756254 |
| FETUB | 0.517316895 | 0.006185671 | 0.183181105 |
| DGAT2 | 0.516633564 | 0.000830378 | 0.080733735 |
| TSKU | 0.501683049 | 0.00253742 | 0.126602069 |
| **Downregulated** |  |  |  |
| FGF13 | -0.509413436 | 0.001051835 | 0.085794892 |
| RCAN2 | -0.510840112 | 0.008565652 | 0.213687361 |
| PAG1 | -0.513947851 | 3.25E-05 | 0.020093205 |
| IGF1 | -0.520770627 | 0.002962255 | 0.133272004 |
| GABRB3 | -0.524226977 | 0.000190278 | 0.040794773 |
| ESRRG | -0.525696874 | 0.000453815 | 0.064268278 |
| COL3A1 | -0.530916627 | 0.002668167 | 0.129253891 |
| UBE2Q2 | -0.531410816 | 0.005012803 | 0.166339833 |
| PALLD | -0.532818065 | 6.25E-05 | 0.026308726 |
| CISH | -0.543009748 | 0.003581099 | 0.145071394 |
| MUM1L1 | -0.545685077 | 0.007253447 | 0.197071691 |
| CTGF | -0.546879235 | 0.006937687 | 0.193843447 |
| EVI2A | -0.549888121 | 0.002963913 | 0.133272004 |
| TRIM22 | -0.552368741 | 0.001688581 | 0.104470086 |
| GJA1 | -0.557409429 | 0.000263822 | 0.048006721 |
| FAM150B | -0.563236578 | 0.004574758 | 0.16146474 |
| ZMAT3 | -0.565430387 | 0.000140072 | 0.036554655 |
| EMCN | -0.571316848 | 5.20E-06 | 0.0082023 |
| C12orf5 | -0.577248333 | 0.003210843 | 0.138572857 |
| TIMP1 | -0.577872942 | 0.012373476 | 0.249578174 |
| ITM2A | -0.580206124 | 0.000262342 | 0.048006721 |
| ITGBL1 | -0.582363396 | 0.00020312 | 0.042291881 |
| SELM | -0.582382161 | 0.000426042 | 0.062758573 |
| FABP4 | -0.583316361 | 0.03938094 | 0.395622454 |
| LXN | -0.586745639 | 0.000871959 | 0.081036063 |
| MGP | -0.589067667 | 5.40E-05 | 0.025845985 |
| ROBO1 | -0.607714184 | 0.004248761 | 0.156558307 |
| RBP7 | -0.639116485 | 0.000162365 | 0.038635789 |
| RP1-93H18.6 | -0.643528415 | 0.008109595 | 0.207081556 |
| COL1A2 | -0.680578513 | 0.000472236 | 0.064948073 |
| C7 | -0.681801828 | 4.15E-05 | 0.022902575 |
| LUM | -0.684248508 | 2.25E-06 | 0.006082597 |
| TMEM45B | -0.689379604 | 0.003417643 | 0.143144393 |
| DPT | -0.693467837 | 9.67E-06 | 0.011016692 |
| WBP5 | -0.697974942 | 4.23E-05 | 0.022902575 |
| SPP1 | -0.712679063 | 0.000926148 | 0.083214976 |
| CXCL10 | -0.714871226 | 0.033007454 | 0.365338321 |
| AQP1 | -0.721639643 | 0.000842608 | 0.080733735 |
| CCDC146 | -0.73840931 | 4.89E-06 | 0.0082023 |
| CPE | -0.745707476 | 0.01334984 | 0.25856658 |
| STMN2 | -0.748987629 | 0.000244644 | 0.047054817 |
| TSPAN8 | -0.753798667 | 0.043015222 | 0.406631582 |
| IGJ | -0.757984037 | 0.027479607 | 0.33599289 |
| FABP5 | -0.758202524 | 0.035948316 | 0.37974646 |
| CCL19 | -0.773971667 | 0.005905379 | 0.180359777 |
| RASSF3 | -0.779278723 | 3.71E-08 | 0.0004018 |
| CLDN10 | -0.834041949 | 0.000431666 | 0.063157356 |
| FKBP1B | -0.844531441 | 0.00186808 | 0.108740359 |
| TFPI2 | -0.858409709 | 0.000347005 | 0.054847049 |
| CHST9 | -0.869719613 | 0.000271257 | 0.048948362 |
| FREM2 | -0.895675641 | 0.011940767 | 0.244295967 |
| CD24 | -0.906782928 | 0.002657518 | 0.129253891 |
| EFEMP1 | -0.936631308 | 9.38E-07 | 0.003386399 |
| NTS | -0.980339149 | 0.001277571 | 0.093887898 |
| CCL20 | -0.997594149 | 0.000251474 | 0.047351455 |
| IL32 | -1.00060827 | 0.000473898 | 0.064948073 |
| GEM | -1.003800984 | 3.08E-05 | 0.019680271 |
| PLA2G2A | -1.097423296 | 0.012928414 | 0.25413792 |
| CHI3L1 | -1.223521359 | 0.000146578 | 0.036906965 |
| ENPP2 | -1.353661669 | 3.57E-06 | 0.007734887 |
| EPCAM | -1.4015328 | 4.41E-05 | 0.022959894 |
| THBS2 | -1.426506324 | 1.46E-06 | 0.004506156 |
| CXCL6 | -1.464365713 | 9.63E-06 | 0.011016692 |
