# Supplementary material for: Identification of Fatty acid metabolism-Related Genes in the Progression from Non-Alcoholic Fatty Liver to Nonalcoholic fatty liver disease
Source: Research Square preprint supplement (doi:10.21203/rs.3.rs-5030401/v1), 2024-10-21
Supplement: Supplementary file 7 [file 5a7c3791cd1415afede945e8.docx]

**Table S4. The up- and down-regulated FAMRDEGs in NAFLD and normal samples.**

| Genes | LogFC | P.Value | Adj.P.Val |
| --- | --- | --- | --- |
| **Upregulated** | | | |
| FMO1 | 0.601802552 | 1.00E-06 | 2.20E-05 |
| ME1 | 0.499349697 | 3.20E-06 | 3.52E-05 |
| ADH5 | 0.392644931 | 4.48E-05 | 0.000394387 |
| ACOT12 | 0.377192437 | 3.62E-08 | 1.59E-06 |
| PRKAA2 | 0.376220893 | 0.000187666 | 0.001376215 |
| THRSP | 0.318709841 | 0.001138191 | 0.002827584 |
| ENO3 | 0.305090481 | 0.002961407 | 0.004444641 |
| HMGCS1 | 0.286514865 | 0.001928419 | 0.003263479 |
| GPD1 | 0.262704825 | 0.000407928 | 0.001690846 |
| PRKAB2 | 0.261813573 | 0.000308086 | 0.001690846 |
| AMACR | 0.257167114 | 0.001264192 | 0.002827584 |
| ACBD5 | 0.252736805 | 0.000872953 | 0.002743566 |
| HPGD | 0.248205577 | 0.00429075 | 0.005088199 |
| DBI | 0.238213329 | 0.004509994 | 0.005088199 |
| ELOVL6 | 0.237702767 | 0.001805086 | 0.003256204 |
| SLC25A20 | 0.230244505 | 0.000361122 | 0.001690846 |
| HIBCH | 0.229070019 | 0.004758392 | 0.005106567 |
| IDI1 | 0.22127919 | 0.00381444 | 0.004704801 |
| IDH1 | 0.206725377 | 0.000960537 | 0.002817576 |
| ALAD | 0.185200166 | 0.001850116 | 0.003256204 |
| ACOT9 | 0.170794756 | 0.001270868 | 0.002827584 |
| ACADL | 0.169910367 | 0.002108137 | 0.003435483 |
| NSDHL | 0.168329178 | 0.004403248 | 0.005088199 |
| HADH | 0.162660399 | 0.005509824 | 0.005772196 |
| PTGR1 | 0.152482185 | 0.002856111 | 0.004444641 |
| RDH16 | 0.144893771 | 0.001573213 | 0.003146426 |
| SCP2 | 0.137950959 | 0.003030437 | 0.004444641 |
| UROD | 0.134054538 | 0.003849383 | 0.004704801 |
| PCCB | 0.129314734 | 0.005691943 | 0.005824314 |
| CYP4F2 | 0.124077769 | 0.007152663 | 0.007152663 |
| ERP29 | 0.106781459 | 0.00314731 | 0.00446715 |
| PPT1 | 0.102197963 | 0.004671701 | 0.005106567 |
| **Downregulated** | | | |
| TP53INP2 | -0.134754848 | 0.001437125 | 0.003011118 |
| LDHA | -0.143788724 | 0.003705305 | 0.004704801 |
| MAPKAPK2 | -0.169296799 | 0.000830904 | 0.002743566 |
| ELOVL4 | -0.171530891 | 0.003464052 | 0.004629596 |
| CA4 | -0.218673516 | 0.001231229 | 0.002827584 |
| ACSS1 | -0.224070416 | 0.001285265 | 0.002827584 |
| DPEP3 | -0.25487971 | 0.000312664 | 0.001690846 |
| CPT1C | -0.276427399 | 0.003472197 | 0.004629596 |
| CYP2C19 | -0.307488265 | 0.000494828 | 0.001814369 |
| ALOX12B | -0.340042636 | 0.000422712 | 0.001690846 |
| GAD2 | -0.393692703 | 0.001725225 | 0.003256204 |
| PTGS2 | -0.497935544 | 1.81E-06 | 2.66E-05 |
