# Supplementary material for: Identification of Fatty acid metabolism-Related Genes in the Progression from Non-Alcoholic Fatty Liver to Nonalcoholic fatty liver disease
Source: Research Square preprint supplement (doi:10.21203/rs.3.rs-5030401/v1), 2024-10-21
Supplement: Supplementary file 8 [file 78be1b59e8fe5a26daf59b82.docx]

| Type | ID | Description | setSize | enrichmentScore | NES | pvalue | p.adjust | qvalues | rank | leading_edge | core_enrichment |
| --- | --- | --- | --- | --- | --- | --- | --- | --- | --- | --- | --- |
| GO | GOBP_DETECTION_OF_CHEMICAL_STIMULUS | GOBP_DETECTION_OF_CHEMICAL_STIMULUS | 413 | -0.554371063 | -2.768504689 | 1.00E-10 | 2.95E-08 | 2.27E-08 | 4332 | tags=59%, list=28%, signal=44% | OR52R1/OR52B2/OR5K1/NKX6-1/DRGX/OR14I1/OR1J1/OR8U1/OR13D1/OR5H1/OR4D5/OR1E1/OR8H1/OR6N1/OR2C1/TAS2R8/OR2D3/TAS2R39/OR4X2/OR1B1/OR1A1/OR2L3/OR2A14/OR5M3/SCARB1/TLR2/OR6C75/OR13A1/TAS2R9/OR7E24/OR13C3/CLEC7A/OR51T1/OR8D4/OR6B2/OR10Z1/OR4P4/OR6C6/OR2T4/OR5A1/OR10K2/OR10H1/OR5AR1/OR1C1/OR8K1/OR4K15/OR6P1/OR7C2/OR6K3/STIM1/OR5P2/OR5L1/OR10H4/OR6C3/OR51G1/OR2AG2/GPR148/OR8S1/OR11H6/OR10A7/OR1N1/LPO/OR4K17/OR2Z1/FOXA2/OR10C1/OR8A1/OR1F1/OR2T1/OR6A2/OR5M9/OR2T11/OR56A1/OR14C36/OR5AC2/OR6K2/OR13H1/OR5D14/OR51I1/OR2T27/OR5D18/OR6M1/OR52N1/KCNMB4/OR5M11/OR5B3/OR2A5/OR52E4/OR5H14/OR2G3/OR4A16/TAS1R1/RYR2/KCNMB1/PKD1L3/TAS2R16/OR4A15/OR6S1/OR6K6/CASQ2/OR10G2/OR4K14/OR51I2/OR1L1/OR11A1/OR10G9/OR8B8/OR4C16/OR51D1/OR5A2/OR7A5/OR4F15/OR4N2/OR1L6/OR1N2/OR2G2/OR10Q1/OR5T2/OR51E1/TRPA1/OR9K2/OR8J3/OR5D13/OR5T3/OR5M1/OR5C1/OR2W1/OR5M10/OR52A5/OR1K1/OR5B2/OR51S1/OR6X1/OR10T2/TAS2R1/OR2V2/OR5AN1/OR10P1/OR4C15/OR4L1/OR8I2/CST1/OR4D11/OR4X1/OR13F1/OR1J4/OR2L2/OR4D6/OR4A47/OR6C68/OR5AK2/OR2F1/OR4C6/OR4D10/OR4K1/OR10A6/OR1I1/OR10X1/OR5AS1/OR56B1/OR4C45/OR10G8/OR10A4/OR5D16/OR11G2/OR2AK2/OR10R2/OR6Y1/OR51B6/OR7D2/OR51A7/OR8D1/OR1S1/OR2K2/OR5H2/OR4C3/OR12D3/OR6N2/NOD2/OR10H2/OR1L4/OR5AU1/OR4D1/OR13J1/OR52J3/OR4C13/OR5AP2/OR4E2/OR52N4/OR8K5/OR5M8/OR4D9/OR52K1/OR10A3/OR2B6/OR2G6/TAS2R40/OR4A5/OR51V1/OR51F2/OR8B3/OR2H1/OR5I1/OR8D2/OR6C4/OR11L1/OR2L13/LBP/OR4K2/OR56A4/OR1M1/OR5B21/OR10H5/OR5H6/OR5J2/RTP2/OR51Q1/OR2F2/OR5B12/OR5P3/OR4D2/OR2J3/OR14J1/OR5V1/GNAT1/OR4K5/OR52I2/OR6C1/OR2B2/OR2S2/OR2AE1/OR6Q1/OR7C1/OR2A7/OR4F29/OR2B11/OR2A42/OR13G1/OR4F4/OR1L3/OR4K13/OR2L8/TGFB3 |
| GOBP_DETECTION_OF_STIMULUS_INVOLVED_IN_SENSORY_PERCEPTION | GOBP_DETECTION_OF_STIMULUS_INVOLVED_IN_SENSORY_PERCEPTION | 438 | -0.564506667 | -2.848125746 | 1.00E-10 | 2.95E-08 | 2.27E-08 | 4045 | tags=55%, list=26%, signal=42% | OR6N1/OR2C1/TAS2R8/OR2D3/TAS2R39/OR4X2/OR1B1/OR1A1/OR2L3/OR2A14/OR5M3/BEST1/OR6C75/OR13A1/TAS2R9/OR7E24/GJA10/OR13C3/OR51T1/OR8D4/OR6B2/OR10Z1/ITGA2/OR4P4/OR6C6/OR2T4/OR5A1/RHO/OR10K2/OR10H1/OR5AR1/OR1C1/OR8K1/OR4K15/OR6P1/OR7C2/OR6K3/OR5P2/OR5L1/OR10H4/OR6C3/OR51G1/OR2AG2/GPR148/OR8S1/OR11H6/OR10A7/OR1N1/CHRNA9/NTSR1/LPO/OR4K17/OR2Z1/OR10C1/NTRK1/ATP8A2/OR8A1/OR1F1/OR2T1/OR6A2/OR5M9/OR2T11/RPE65/KCNK4/OR56A1/OR14C36/OR5AC2/OR6K2/OR13H1/OR5D14/OR51I1/OR2T27/OR5D18/OR6M1/OR52N1/OR5M11/OR5B3/OR2A5/OR52E4/OR5H14/OR2G3/OR4A16/TAS1R1/PKD1L3/TAS2R16/OR4A15/OR6S1/OR6K6/OR10G2/OR4K14/OR51I2/OR1L1/OR11A1/OR10G9/OR8B8/OR4C16/OR51D1/OR5A2/OR7A5/OR4F15/OR4N2/OR1L6/OR1N2/OR2G2/OR10Q1/OR5T2/OR51E1/TRPA1/OR9K2/PPEF1/OR8J3/OR5D13/OR5T3/OR5M1/OR5C1/OR2W1/OR5M10/OR52A5/OR1K1/OR5B2/PDZD7/OR51S1/OR6X1/OR10T2/TAS2R1/OR2V2/OR5AN1/OR10P1/OR4C15/OR4L1/OR8I2/CST1/OR4D11/OR4X1/OR13F1/OR1J4/OR2L2/PPEF2/CXCR4/OR4D6/OR4A47/OR6C68/OR5AK2/OR2F1/OR4C6/OR4D10/OR4K1/OR10A6/OR1I1/OR10X1/OR5AS1/OR56B1/OR4C45/OR10G8/OR10A4/EPHB1/OR5D16/OR11G2/OR2AK2/OR10R2/OR6Y1/OR51B6/OR7D2/OR51A7/OR8D1/OR1S1/OR2K2/OR5H2/OR4C3/OR12D3/OR6N2/OR10H2/SCN1A/OR1L4/OR5AU1/OR4D1/OR13J1/OR52J3/OR4C13/OR5AP2/OR4E2/OR52N4/OR8K5/OR5M8/OR4D9/OR52K1/OR10A3/OR2B6/OR2G6/KCNA1/TAS2R40/OR4A5/OR51V1/OR51F2/OR8B3/OR2H1/OR5I1/OR8D2/OR6C4/OR11L1/OR2L13/OR4K2/OR56A4/OR1M1/RGS9BP/STRC/OR5B21/OR10H5/OR5H6/OR5J2/RTP2/OR51Q1/CNGB1/OR2F2/ROM1/OR5B12/OR5P3/OR4D2/CHRNA10/OR2J3/OR14J1/OR5V1/GNAT1/OR4K5/OR52I2/OR6C1/OR2B2/LHFPL5/OR2S2/OR2AE1/PRDM12/OR6Q1/OR7C1/OR2A7/OR4F29/OR2B11/OR2A42/OR13G1/OR4F4/OR1L3/OR4K13/CALCA/OR2L8 |
| GOBP_DNA_REPAIR | GOBP_DNA_REPAIR | 451 | 0.426283417 | 2.160484583 | 1.00E-10 | 2.95E-08 | 2.27E-08 | 4504 | tags=46%, list=29%, signal=33% | GINS2/MSH2/NHEJ1/FIGNL1/FANCL/PTTG1/ISG15/MCM5/ACTR8/BRCA1/DTL/ASF1A/XPA/CETN2/KIF22/PMS2/PCNA/COPS4/CHEK1/UBE2T/ZRANB3/RAD51AP1/NEIL2/CHAF1A/RFC1/AXIN2/FAM111A/FEN1/NUDT16L1/CBX8/POLE2/SMC6/POLR2K/FANCI/BRCC3/POLD1/COPS6/MCM6/POLB/ESCO2/MCM2/PARP2/OGG1/GEN1/EXD2/GTF2H5/FZR1/PSMD14/RAD51C/POLH/USP47/TFPT/POLG2/FBXO6/GTF2I/USP28/RUVBL2/POLR2E/GADD45A/RFC3/APLF/ATXN3/RNASEH2A/POLR2G/NPAS2/CEBPG/SMARCAD1/NSMCE2/STUB1/POLK/ETAA1/POLR2L/WDR48/FANCC/RRM2B/TTC5/MORF4L2/PPIE/COPS5/DCLRE1A/FANCG/SMARCAL1/TP53BP1/RAD17/HMGN1/GTF2H3/TRIP13/POLI/PARP9/ASCC3/ERCC8/COPS2/ERCC6/UVRAG/MAD2L2/WDHD1/SMG1/ACTR5/DDB2/XRCC3/HERC2/NUDT1/PMS1/NPM1/POLR2B/ZBTB1/SPIRE1/ISY1/RBX1/RFC5/CHAF1B/NSMCE4A/ACTR2/USP45/XRCC4/MLH1/RPA3/LIG4/FAM168A/MNAT1/SAMHD1/ATRX/RAD18/POLD2/DCLRE1C/APEX1/SLC30A9/RECQL/CHEK2/KAT5/REXO4/NEIL1/CINP/SUMO1/USP51/CDC5L/PARK7/RMI1/RAD52/DCLRE1B/CLSPN/MAGEF1/RFC4/HMGB2/TDP1/RUVBL1/POT1/XRCC5/POLDIP2/ACTL6A/NTHL1/MBD4/POLR2J/ZNF830/RAD9A/ERCC4/ZMPSTE24/XRCC1/RNF8/PAXIP1/ATM/VCP/EME1/USP3/NSMCE1/SETX/UBE2L6/BCCIP/DDX11/ASCC1/POLD3/EXO1/INO80C/XRCC2/MCM8/FTO/MGMT/CHD1L/RPS27A/OTUB2/RAD9B/MCM4/ERCC3/FANCM/WDR70/RPS3/GPS1/UBE2V2/HELQ/RPA1/RAD50/USP1/RAD54B/DMAP1/RFWD3/CDCA5/USP7/POLM/TCEA1/POLR2F/RECQL4/DHX9/PDS5B/DDX1/RAD54L/AQR |
| GOBP_ENDOPLASMIC_RETICULUM_TO_GOLGI_VESICLE_MEDIATED_TRANSPORT | GOBP_ENDOPLASMIC_RETICULUM_TO_GOLGI_VESICLE_MEDIATED_TRANSPORT | 183 | 0.4994396 | 2.287434791 | 1.00E-10 | 2.95E-08 | 2.27E-08 | 4096 | tags=50%, list=26%, signal=37% | KDELR3/COG4/KLHL12/SCFD1/GOSR1/TRIP11/STX18/SPAST/COG5/TRAPPC6B/STX17/GOPC/MIA3/TRAPPC6A/VTI1B/F8/DYNC1I2/LRRK2/LMAN2L/GOLGA2/TFG/SEC13/MPPE1/COPZ1/BET1/GAS6/TMED10/SEC23B/NSF/MIA2/YIF1B/SEC24A/SEC24D/COG6/LMAN2/YIPF5/SEC23A/CTSZ/GOSR2/DCTN5/TRAPPC2/COPB2/ACTR10/COPZ2/SEC22C/CREB3L2/LMAN1/CNIH4/SEC31A/ERGIC3/SEC22A/DYNC1LI1/RNF139/F7/DYNLL1/DYNC1H1/TMED2/CTSC/GBF1/TMED1/SEC16B/SAR1B/HYOU1/COG1/ERGIC2/ARFGAP2/MCFD2/COPB1/TRAPPC3/SAR1A/ARF4/TBC1D20/KDELR2/VCP/PROZ/COG3/SPTBN5/SEC24C/TMED4/STX5/SEC31B/DCTN4/USO1/ZW10/DCTN6/RINT1/GOLGB1/TRAPPC2L/YKT6/F2/RANGRF/SEC24B |
| GOBP_EPIDERMAL_CELL_DIFFERENTIATION | GOBP_EPIDERMAL_CELL_DIFFERENTIATION | 305 | -0.45512194 | -2.220623851 | 1.00E-10 | 2.95E-08 | 2.27E-08 | 4622 | tags=51%, list=30%, signal=36% | KRT79/KRTAP6-2/JAG2/KRTAP23-1/RUNX1/KRT82/KRT5/ETV4/TMEM132E/S100A7/BCR/KRTAP6-1/KRT32/KRT76/SCEL/KRT81/KRT3/KRT71/SPINK6/CDH3/KRTAP5-11/PKP1/ZBED2/DLL1/KRT73/HEY2/KRTAP4-11/MAFG/LCE1B/KRTAP12-2/ALOX15B/POU3F1/KRTAP13-2/KRTAP19-5/INTU/CLRN1/KRTAP10-9/USH1C/PITX2/KRT23/KRTAP26-1/KRT34/CBFB/KRT19/ZFP36L1/LCE3E/KRTAP10-7/DSP/LCE1D/KRTAP10-8/PI3/KRT9/KRT84/KRT12/KRTAP4-2/KRT74/KRTAP12-4/KRT77/PTCH1/YAP1/KRT6B/SPINK9/KRTAP10-4/KRT85/EREG/PALLD/KRT25/KRTAP4-5/FURIN/KRT27/KRTAP5-6/JUP/KRTAP20-1/FLG/KRTAP5-7/KRTAP5-1/KRTAP13-1/VDR/AQP3/KRTAP9-3/KRTAP5-10/KRTAP10-11/KRT20/KRTAP5-4/KRTAP10-10/HES1/KRTAP9-4/KRTAP27-1/KRT38/KLK14/KRT35/SPRR4/KRT15/KRTAP10-3/KRTAP12-1/PDZD7/KRTAP10-1/KRT28/ATOH1/SLC9A3R1/KRT13/SULT2B1/REG3G/KRTAP4-1/SLC44A4/KRT24/GRHL1/SPRR2E/KRT7/KRTAP17-1/SERPINB13/CASP14/KRT16/DNASE1L2/KRTAP5-9/KRTAP11-1/SLC4A7/ACER1/GRHL2/KRTAP5-2/JAG1/LCE5A/KRT6A/FA2H/KRTAP1-3/KRTAP4-4/TGM5/KRT33B/KRTAP8-1/HES5/SPINK5/STRC/LCE1C/KRT4/GATA6/GDF3/SPRR3/CYP27B1/PTCH2/KRTAP5-3/KRT80/KRT72/LHFPL5/IL20/KRTAP3-2/KLK13/LIPN/POU4F3/MAFF/SFN/KLF4/FOXC1/FOSL2/ZFP36/EPHA2 |
| GOBP_EPIDERMIS_DEVELOPMENT | GOBP_EPIDERMIS_DEVELOPMENT | 404 | -0.40233256 | -2.00829214 | 1.00E-10 | 2.95E-08 | 2.27E-08 | 3902 | tags=44%, list=25%, signal=34% | KRT32/KRT76/SCEL/KRT81/KRT3/KRT71/SPINK6/SOX18/CDH3/KRTAP5-11/PKP1/ZBED2/DLL1/KRT73/CRABP2/IGFBP5/HEY2/KRTAP4-11/MAFG/LCE1B/KRTAP12-2/ALOX15B/POU3F1/KRTAP13-2/KRTAP19-5/INTU/CLRN1/KRTAP10-9/GRHL3/USH1C/NSUN2/LAMA5/PITX2/KRT23/PTHLH/KRTAP26-1/KRT34/CBFB/KRT19/ZFP36L1/CALML5/LCE3E/KRTAP10-7/DSP/LCE1D/KRTAP10-8/PI3/WNT10B/KRT9/HOXB13/EGFR/KRT84/KRT12/KRTAP4-2/KRT74/KRTAP12-4/KRT77/PTCH1/ACVR1B/YAP1/KRT6B/KRTDAP/SPINK9/KRTAP10-4/APCDD1/KRT85/EREG/PALLD/KRT25/KRTAP4-5/WAS/FURIN/KRT27/RELA/KRTAP5-6/JUP/KRTAP20-1/FLG/KRTAP5-7/KRTAP5-1/KRTAP13-1/VDR/AQP3/KRTAP9-3/KRTAP5-10/KRTAP10-11/KRT20/TGFB2/KRTAP5-4/KRTAP10-10/HES1/FZD6/KRTAP9-4/FGF10/KRTAP27-1/KRT38/KLK14/KRT35/SPRR4/KRT15/KRTAP10-3/KRTAP12-1/PDZD7/KRTAP10-1/KRT28/ATOH1/SLC9A3R1/KRT13/SULT2B1/REG3G/KRTAP4-1/SLC44A4/KRT24/SOX21/GRHL1/SPRR2E/POU3F2/KRT7/KRTAP17-1/KLK7/SERPINB13/CASP14/KRT16/DNASE1L2/KRTAP5-9/KRTAP11-1/SLC4A7/ACER1/GRHL2/FOXQ1/KRTAP5-2/ZNF750/DCT/JAG1/LCE5A/KRT6A/FA2H/KRTAP1-3/NTF4/KRTAP4-4/DKK4/TGM5/KRT33B/KRTAP8-1/HES5/SPINK5/STRC/LCE1C/KRT4/GATA6/FLOT2/GDF3/SPRR3/CYP27B1/LAMC2/PTCH2/KRTAP5-3/KRT80/ALX4/KRT72/LHFPL5/IL20/KRTAP3-2/KLK13/LIPN/FST/POU4F3/LRP4/MAFF/EMP1/SFN/KLF4/FOXC1/FOSL2/ZFP36/EPHA2 |
| GOBP_GOLGI_VESICLE_TRANSPORT | GOBP_GOLGI_VESICLE_TRANSPORT | 333 | 0.464875082 | 2.278508834 | 1.00E-10 | 2.95E-08 | 2.27E-08 | 4767 | tags=54%, list=31%, signal=38% | RAB26/KDELR3/RABIF/COG4/KLHL12/SCFD1/KIF22/GOSR1/TRIP11/STX18/WIPI1/KIF16B/SPAST/COG5/TRAPPC6B/GOLPH3L/STX17/RACGAP1/RAB8A/BBS2/GOPC/MIA3/TRAPPC6A/VTI1B/F8/DYNC1I2/VPS13C/LRRK2/LMAN2L/GOLGA2/NAPG/EXOC4/TFG/CCDC93/SEC13/MPPE1/COPZ1/BET1/SNX2/VAMP5/OPTN/GAS6/TMED10/SEC23B/CCDC22/NSF/MIA2/YIF1B/VAMP8/VAMP3/KIF3A/SEC24A/RAB33B/NBAS/SEC24D/COG6/LMAN2/YIPF5/SEC23A/SNX12/KIFAP3/CTSZ/GOSR2/DCTN5/LYPLA1/TRAPPC2/GOLGA7/COPB2/MYO5A/ACTR10/KRT18/UVRAG/COPZ2/SEC22C/CREB3L2/SPIRE1/LMAN1/GABARAPL2/USE1/KIF3B/SNX1/CNIH4/SEC31A/ERGIC3/SEC22A/DNAJC28/KIF11/DYNC1LI1/EXOC6/TAPBP/RNF139/F7/RSC1A1/VPS54/LLGL1/DYNLL1/ARFRP1/RER1/SNAP23/RAB10/STX4/DYNC1H1/TMED2/CCDC91/CTSC/ATP9A/GBF1/LAMP1/ARF3/TMED1/SEC16B/SAR1B/BLZF1/HYOU1/PRKD1/COG1/ERGIC2/ARFGAP2/MCFD2/CUX1/COPB1/TRAPPC3/SAR1A/ARF4/TBC1D20/KDELR2/VCP/CENPE/PRKCI/RABEP1/PROZ/SGSM2/COG3/SPTBN5/SEC24C/TMED4/STX5/SEC31B/DCTN4/EXOC8/USO1/ZW10/GOLGA4/DCTN6/RINT1/GOLGB1/TRAPPC2L/VPS52/YKT6/EXOC1/F2/SNX3/KIF2A/RANGRF/SEC24B/EXOC2/KIF2C/GGA3/VAPB/STX6/DYNLL2/DCTN3/RAB1A/MON2/KLC1/CUL3/MYO1B/ACTR1A/BET1L/TBC1D14/CLN3/ARFGEF2/RP2/TMED9/RAB14/AP1G2/GCC2/TRAPPC4/PITPNB |
| GOBP_KERATINIZATION | GOBP_KERATINIZATION | 188 | -0.500638883 | -2.293419633 | 1.00E-10 | 2.95E-08 | 2.27E-08 | 4316 | tags=51%, list=28%, signal=37% | KRTAP6-1/KRT32/KRT76/KRT81/KRT3/KRT71/SPINK6/CDH3/KRTAP5-11/PKP1/KRT73/KRTAP4-11/LCE1B/KRTAP12-2/KRTAP13-2/KRTAP19-5/KRTAP10-9/KRT23/KRTAP26-1/KRT34/KRT19/LCE3E/KRTAP10-7/DSP/LCE1D/KRTAP10-8/PI3/KRT9/KRT84/KRT12/KRTAP4-2/KRT74/KRTAP12-4/KRT77/KRT6B/SPINK9/KRTAP10-4/KRT85/KRT25/KRTAP4-5/FURIN/KRT27/KRTAP5-6/JUP/KRTAP20-1/FLG/KRTAP5-7/KRTAP5-1/KRTAP13-1/KRTAP9-3/KRTAP5-10/KRTAP10-11/KRT20/KRTAP5-4/KRTAP10-10/KRTAP9-4/KRTAP27-1/KRT38/KLK14/KRT35/SPRR4/KRT15/KRTAP10-3/KRTAP12-1/KRTAP10-1/KRT28/KRT13/KRTAP4-1/KRT24/SPRR2E/KRT7/KRTAP17-1/CASP14/KRT16/KRTAP5-9/KRTAP11-1/KRTAP5-2/LCE5A/KRT6A/KRTAP1-3/KRTAP4-4/TGM5/KRT33B/KRTAP8-1/SPINK5/LCE1C/KRT4/SPRR3/KRTAP5-3/KRT80/KRT72/KRTAP3-2/KLK13/LIPN/SFN |
| GOBP_KERATINOCYTE_DIFFERENTIATION | GOBP_KERATINOCYTE_DIFFERENTIATION | 256 | -0.452263211 | -2.15021097 | 1.00E-10 | 2.95E-08 | 2.27E-08 | 4622 | tags=50%, list=30%, signal=36% | KRT79/KRTAP6-2/KRTAP23-1/RUNX1/KRT82/KRT5/ETV4/S100A7/BCR/KRTAP6-1/KRT32/KRT76/SCEL/KRT81/KRT3/KRT71/SPINK6/CDH3/KRTAP5-11/PKP1/ZBED2/KRT73/KRTAP4-11/LCE1B/KRTAP12-2/ALOX15B/POU3F1/KRTAP13-2/KRTAP19-5/INTU/KRTAP10-9/KRT23/KRTAP26-1/KRT34/CBFB/KRT19/ZFP36L1/LCE3E/KRTAP10-7/DSP/LCE1D/KRTAP10-8/PI3/KRT9/KRT84/KRT12/KRTAP4-2/KRT74/KRTAP12-4/KRT77/YAP1/KRT6B/SPINK9/KRTAP10-4/KRT85/EREG/PALLD/KRT25/KRTAP4-5/FURIN/KRT27/KRTAP5-6/JUP/KRTAP20-1/FLG/KRTAP5-7/KRTAP5-1/KRTAP13-1/VDR/AQP3/KRTAP9-3/KRTAP5-10/KRTAP10-11/KRT20/KRTAP5-4/KRTAP10-10/KRTAP9-4/KRTAP27-1/KRT38/KLK14/KRT35/SPRR4/KRT15/KRTAP10-3/KRTAP12-1/KRTAP10-1/KRT28/KRT13/REG3G/KRTAP4-1/KRT24/GRHL1/SPRR2E/KRT7/KRTAP17-1/SERPINB13/CASP14/KRT16/DNASE1L2/KRTAP5-9/KRTAP11-1/ACER1/GRHL2/KRTAP5-2/JAG1/LCE5A/KRT6A/KRTAP1-3/KRTAP4-4/TGM5/KRT33B/KRTAP8-1/SPINK5/LCE1C/KRT4/SPRR3/CYP27B1/KRTAP5-3/KRT80/KRT72/IL20/KRTAP3-2/KLK13/LIPN/SFN/FOXC1/FOSL2/ZFP36/EPHA2 |
| GOBP_PROTEIN_TARGETING | GOBP_PROTEIN_TARGETING | 388 | 0.41803661 | 2.08372334 | 1.00E-10 | 2.95E-08 | 2.27E-08 | 4854 | tags=49%, list=31%, signal=34% | RPS4Y1/RTP4/RTP3/PDZK1/DDO/SIRT4/CHMP4A/ZDHHC2/DAO/AMACR/IMMP1L/CDK5/RPS21/C11orf65/VPS41/SPCS2/SGTB/TIMM17A/IDH1/VPS37D/PEX3/AP3M1/SSR3/VPS11/RASSF9/VTI1B/FIS1/VPS13C/LRRK2/IDE/EXOC4/FUT10/OS9/ITGB1BP1/RPL7A/RPS26/UBL5/ACOT8/ACAA1/HAO1/SEC61G/SEC61A2/TIMM8B/YIF1B/NUDT7/PHYH/RPSA/KCNB1/RPS7/SRP14/SAMM50/BAG4/GNPTAB/RPL26/KATNB1/SCP2/GOSR2/HACL1/ZFAND6/GOLGA7/RPL23A/LAMP2/RPL37/RPL7/PEX12/HSPA5/FBXO7/RPL35A/SSR1/PMPCB/RPL13A/GIPC1/RPS23/RPS29/RPL8/LMAN1/IMMP2L/MON1A/RPL15/CROT/EHHADH/TIMM13/CHM/PEX14/RPLP0/ZFYVE16/GNPAT/PAK1/TYSND1/HSPA4/ERBB2/RPL34/MFF/SPCS3/RPL17/PEX5/RPS3A/NPEPPS/PAOX/SDCBP/RPL41/ZDHHC3/M6PR/ZFAND2B/PEX1/PEX7/PIPOX/SAE1/ARL6/RPS2/SREBF2/PECR/NUP54/HMGCL/AIFM1/SH3GLB1/SRP9/AGPS/SRP54/RPL29/ATG3/HTRA2/CACNB3/RPL9/NEDD4/ZDHHC20/PEX16/ACOX2/RABGEF1/PRKCI/AGK/RPL11/CAT/PDCD5/HRAS/SSR2/NACA/RPS15A/ECH1/RPL3/MIPEP/TRAM1/HAX1/RPL21/ARL6IP1/AP3B1/RPS27A/ITGB2/FBXW7/ROMO1/RPS3/RPL31/SEC63/RPS9/GGA3/RPL27A/ZDHHC21/HSP90AA1/CSNK2A2/RPS24/SRP72/RPS12/PARL/HERPUD1/TOMM40L/TIMM23/GRPEL2/RPS8/ZDHHC7/TOMM22/BNIP3L/SREBF1/SRP68/RPL23/HAO2/ACOT4/SEC62/RPL22/TRAM1L1/LTBP2/SIL1/GCC2/SNX16/HSPD1/BID/ZDHHC24/ZDHHC6/ACOX1/BAAT |
| GOBP_REGULATION_OF_BLOOD_CIRCULATION | GOBP_REGULATION_OF_BLOOD_CIRCULATION | 267 | -0.437831754 | -2.088517941 | 1.00E-10 | 2.95E-08 | 2.27E-08 | 3434 | tags=39%, list=22%, signal=31% | CHGA/GAA/KCNN2/KCNIP4/SCN10A/AKT1/ACE/FGG/DSP/ATP1B1/STIM1/FXYD6/AGER/NKX2-5/MYL4/NPPA/SMTNL2/FGA/EGFR/ATP1A1/OXTR/ISL1/HRH2/NPPC/CACNA2D1/BVES/DMPK/GHRL/KCNJ12/JUP/CACNG5/SCN5A/KCNMB4/CACNG1/KCNJ14/ADA/RYR2/GCH1/CAV1/SCN2B/CASQ2/ATP1B3/ADRA1D/TH/TGFB2/CACNA1G/AGTR1/RGS4/SPTBN4/SLC9A1/SCN3B/DBH/KCNH6/TBXA2R/TRPM4/AVPR1A/CSRP3/CACNG6/KCNG2/KCNIP1/MC3R/GJC1/PDE4B/HSPB7/SLC8A3/ECE1/SEMA3A/ATP1B2/ADRB1/LEP/ATP1A2/PDE4D/KCNA5/ANK2/TRPC1/ATP2A1/CACNG3/ATP2B4/ITPR1/NOS1/GJA1/PER2/KCNE4/ADM/GATA4/TAC1/CACNG7/ICAM1/NOS1AP/EPAS1/HCN4/CACNG2/P2RX1/PTGER2/EDN3/CALCA/STC1/SLC8A2/EDN1/RGS2/HBEGF/KCNK1/ZC3H12A |
| GOBP_SENSORY_PERCEPTION_OF_CHEMICAL_STIMULUS | GOBP_SENSORY_PERCEPTION_OF_CHEMICAL_STIMULUS | 424 | -0.553407439 | -2.779963496 | 1.00E-10 | 2.95E-08 | 2.27E-08 | 4045 | tags=55%, list=26%, signal=42% | OR6N1/OR2C1/TAS2R8/OR2D3/TAS2R39/OR4X2/OR1B1/OR1A1/SLC6A3/OR2L3/OR2A14/OR5M3/DRD2/OR6C75/OR13A1/TAS2R9/OR7E24/OR13C3/OR51T1/OR8D4/GNAS/OR6B2/OR10Z1/OR4P4/OR6C6/OR2T4/OR5A1/OR10K2/SCNN1G/OR10H1/OR5AR1/OR1C1/OR8K1/OR4K15/OR6P1/OR7C2/OR6K3/OR5P2/OR5L1/CNGA2/REEP2/OR10H4/OR6C3/WNT10B/OR51G1/OR2AG2/GPR148/OR8S1/OR11H6/OR10A7/OR1N1/LPO/OR4K17/OR2Z1/OR10C1/OR8A1/OR1F1/OR2T1/OR6A2/OR5M9/OR2T11/OR56A1/OR14C36/OR5AC2/OR6K2/OR13H1/OR5D14/OR51I1/OR2T27/OR5D18/OR6M1/OR52N1/OR5M11/OR5B3/OR2A5/OR52E4/OR5H14/OR2G3/OR4A16/TAS1R1/PKD1L3/TAS2R16/OR4A15/OR6S1/OR6K6/OR10G2/OR4K14/OR51I2/OR1L1/OR11A1/OR10G9/OR8B8/OR4C16/OR51D1/OR5A2/OR7A5/OR4F15/OR4N2/OR1L6/OR1N2/OR2G2/OR10Q1/OR5T2/OR51E1/TRPA1/OR9K2/BEST2/OR8J3/OR5D13/OR5T3/CNGA4/OR5M1/OR5C1/OR2W1/OR5M10/OR52A5/OR1K1/OR5B2/OR51S1/OR6X1/OR10T2/TAS2R1/OR2V2/OR5AN1/OR10P1/OR4C15/OR4L1/OR8I2/CST1/OR4D11/OR4X1/OR13F1/OR1J4/OR2L2/OR4D6/ADCY3/OR4A47/OR6C68/OR5AK2/OR2F1/OR4C6/OR4D10/OR4K1/OR10A6/OR1I1/OR10X1/OR5AS1/OR56B1/OR4C45/OR10G8/OR10A4/OR5D16/OR11G2/OR2AK2/OR10R2/OR6Y1/OR51B6/OR7D2/OR51A7/OR8D1/OR1S1/OR2K2/OR5H2/OR4C3/OR12D3/OR6N2/OR10H2/OR1L4/OR5AU1/OR4D1/OR13J1/OR52J3/OR4C13/OR5AP2/OR4E2/OR52N4/OR8K5/SCNN1A/OR5M8/OR4D9/OR52K1/OR10A3/OR2B6/OR2G6/TAS2R40/OR4A5/OR51V1/OR51F2/OR8B3/OR2H1/OR5I1/OR8D2/OR6C4/OR11L1/OR2L13/OR4K2/OR56A4/OR1M1/OR5B21/OR10H5/OR5H6/OR5J2/RTP2/OR51Q1/SLC24A4/CNGB1/OR2F2/OR5B12/OR5P3/OR4D2/OR2J3/OR14J1/OR5V1/GNAT1/OR4K5/OR52I2/OR6C1/OR2B2/OR2S2/OR2AE1/C5AR1/OR6Q1/OR7C1/OR2A7/OR4F29/OR2B11/OR2A42/OR13G1/OR4F4/OR1L3/OR4K13/OR2L8/SCNN1B |
| GOBP_SENSORY_PERCEPTION_OF_SMELL | GOBP_SENSORY_PERCEPTION_OF_SMELL | 364 | -0.597312399 | -2.952139249 | 1.00E-10 | 2.95E-08 | 2.27E-08 | 4249 | tags=61%, list=27%, signal=45% | OR14I1/OR1J1/OR8U1/OR13D1/OR5H1/OR4D5/OR1E1/OR8H1/OR6N1/OR2C1/OR2D3/OR4X2/OR1B1/OR1A1/SLC6A3/OR2L3/OR2A14/OR5M3/DRD2/OR6C75/OR13A1/OR7E24/OR13C3/OR51T1/OR8D4/OR6B2/OR10Z1/OR4P4/OR6C6/OR2T4/OR5A1/OR10K2/OR10H1/OR5AR1/OR1C1/OR8K1/OR4K15/OR6P1/OR7C2/OR6K3/OR5P2/OR5L1/CNGA2/OR10H4/OR6C3/OR51G1/OR2AG2/GPR148/OR8S1/OR11H6/OR10A7/OR1N1/OR4K17/OR2Z1/OR10C1/OR8A1/OR1F1/OR2T1/OR6A2/OR5M9/OR2T11/OR56A1/OR14C36/OR5AC2/OR6K2/OR13H1/OR5D14/OR51I1/OR2T27/OR5D18/OR6M1/OR52N1/OR5M11/OR5B3/OR2A5/OR52E4/OR5H14/OR2G3/OR4A16/OR4A15/OR6S1/OR6K6/OR10G2/OR4K14/OR51I2/OR1L1/OR11A1/OR10G9/OR8B8/OR4C16/OR51D1/OR5A2/OR7A5/OR4F15/OR4N2/OR1L6/OR1N2/OR2G2/OR10Q1/OR5T2/OR51E1/OR9K2/BEST2/OR8J3/OR5D13/OR5T3/CNGA4/OR5M1/OR5C1/OR2W1/OR5M10/OR52A5/OR1K1/OR5B2/OR51S1/OR6X1/OR10T2/OR2V2/OR5AN1/OR10P1/OR4C15/OR4L1/OR8I2/OR4D11/OR4X1/OR13F1/OR1J4/OR2L2/OR4D6/ADCY3/OR4A47/OR6C68/OR5AK2/OR2F1/OR4C6/OR4D10/OR4K1/OR10A6/OR1I1/OR10X1/OR5AS1/OR56B1/OR4C45/OR10G8/OR10A4/OR5D16/OR11G2/OR2AK2/OR10R2/OR6Y1/OR51B6/OR7D2/OR51A7/OR8D1/OR1S1/OR2K2/OR5H2/OR4C3/OR12D3/OR6N2/OR10H2/OR1L4/OR5AU1/OR4D1/OR13J1/OR52J3/OR4C13/OR5AP2/OR4E2/OR52N4/OR8K5/OR5M8/OR4D9/OR52K1/OR10A3/OR2B6/OR2G6/OR4A5/OR51V1/OR51F2/OR8B3/OR2H1/OR5I1/OR8D2/OR6C4/OR11L1/OR2L13/OR4K2/OR56A4/OR1M1/OR5B21/OR10H5/OR5H6/OR5J2/OR51Q1/SLC24A4/CNGB1/OR2F2/OR5B12/OR5P3/OR4D2/OR2J3/OR14J1/OR5V1/OR4K5/OR52I2/OR6C1/OR2B2/OR2S2/OR2AE1/OR6Q1/OR7C1/OR2A7/OR4F29/OR2B11/OR2A42/OR13G1/OR4F4/OR1L3/OR4K13/OR2L8 |
| GOCC_INTERMEDIATE_FILAMENT | GOCC_INTERMEDIATE_FILAMENT | 167 | -0.496308942 | -2.219467676 | 1.00E-10 | 2.95E-08 | 2.27E-08 | 4622 | tags=57%, list=30%, signal=41% | KRT79/KRTAP6-2/KRTAP23-1/KRT82/KRT5/DES/KRTAP6-1/KRT32/KRT76/KRT81/KRT3/KRT71/SHANK2/NEFM/KRTAP5-11/PKP1/KRT73/KRTAP4-11/KRTAP12-2/KRTAP13-2/KRTAP19-5/KRTAP10-9/SYNC/NES/KRT23/KRTAP26-1/KRT34/KRT19/GFAP/KRTAP10-7/DSP/KRTAP10-8/LMNA/KRT9/LMNB1/KRT84/KRT12/KRTAP4-2/KRT74/KRTAP12-4/KRT77/KRT6B/KRTAP10-4/KRT85/KRT25/KRTAP4-5/NARF/KRT27/KRTAP4-12/KRTAP5-6/JUP/KRTAP20-1/FLG/KRTAP5-7/KRTAP5-1/KRTAP13-1/KRTAP9-3/KRTAP5-10/KRTAP10-11/KRT20/KRTAP5-4/KRTAP10-10/KRTAP9-4/KRTAP27-1/KRT38/KRT35/KRT15/KRTAP10-3/KRTAP12-1/KRTAP10-1/KRT28/KRT13/KRTAP4-1/KRT24/KRT7/KRTAP17-1/CASP14/KRT16/KRTAP5-9/KRTAP11-1/KRTAP5-2/IFFO2/KRT6A/KRTAP1-3/KRTAP4-4/KRT33B/KRTAP8-1/INA/SLC1A4/KRT4/KRTAP5-3/KRT80/KRT72/KRTAP3-2/PRPH/UPP2 |
| GOCC_MITOCHONDRIAL_MATRIX | GOCC_MITOCHONDRIAL_MATRIX | 406 | 0.420491262 | 2.115535 | 1.00E-10 | 2.95E-08 | 2.27E-08 | 4036 | tags=42%, list=26%, signal=32% | TYMS/SIRT4/PDP2/PIN4/TFB1M/ABHD10/CYP11A1/MMAB/NAGS/ACSS3/GFM2/DMGDH/WARS2/HIBCH/ACP6/FAHD1/NDUFAF1/ACSS2/RNASEL/BTD/LARS2/MRPS10/LIAS/ARL2BP/PPIF/MRPL35/ISCA2/C12orf65/DLD/MRPS14/LRRK2/EXD2/GCSH/NSUN3/ACAD8/ACOT9/ACADL/LRRC59/GLS/GUF1/MRPS9/HADH/TDRD7/SUCLG2/MRPS28/POLG2/LACTB2/RPUSD3/ACSM2B/PRDX3/ACSM1/ATXN3/ACSM5/NMNAT3/SUCLA2/NARS2/GLDC/NDUFA10/DBT/MRPL45/DECR1/BDH1/MRPL19/MRPL20/ACO2/MRPL33/MRPS27/HARS2/HAGH/NDUFA9/GLYAT/ACADM/PDSS2/FARS2/PCCB/RARS2/PDHA1/ACSM3/MCCC1/NUDT2/AUH/ALDH1B1/HSD17B8/YARS2/PMPCB/MRPL40/MRPL28/NUDT1/MRPL30/COQ3/CHCHD1/NUDT9/MRPS7/MTHFS/COASY/MRPL47/GLUD2/MRM1/HSD17B10/D2HGDH/TXN2/PRDX5/MRPL18/ACSF2/NFS1/MRPL13/MRPS35/MRPS17/FECH/MRPL48/MRPS11/NR3C1/CA5A/ETFA/TMLHE/FDX1/MRPL52/CARS2/MRPS34/PARK7/HMGCL/PDHB/TSFM/MCEE/CBR4/MRPL14/NSUN4/MRPL17/POLDIP2/COQ5/ETHE1/MRPS18A/MRPL49/MRPL41/ACAT1/SUCLG1/BCKDK/TRMT5/TOP1MT/PARS2/IVD/HADHB/DGUOK/FPGS/STYXL1/MRPL24/SUOX/TK2/AGXT2/TST/ACAD10/DAP3/ACOT11/MPST/MRPL3/ME2/MRPL16/NUDT13/AK3/ISCU/NDUFAB1/MIPEP/MRPL22/DARS2/FASTKD2/SSBP1/TFB2M/IDH2/ETFB/ARL2 |
| GOCC_MITOCHONDRIAL_PROTEIN_CONTAINING_COMPLEX | GOCC_MITOCHONDRIAL_PROTEIN_CONTAINING_COMPLEX | 205 | 0.488185276 | 2.278917944 | 1.00E-10 | 2.95E-08 | 2.27E-08 | 5655 | tags=61%, list=36%, signal=39% | IMMP1L/TIMM17A/NDUFAF1/NDUFA5/MRPS10/PPIF/MRPL35/NDUFS4/NDUFA6/C12orf65/MRPS14/NSUN3/MRPS9/NDUFB2/SUCLG2/MRPS28/POLG2/NDUFB1/PHB/TIMM8B/MFN1/SAMM50/NDUFB4/NDUFA10/DBT/MRPL45/MRPL19/MRPL20/MRPL33/MRPS27/NDUFA9/PDHA1/NDUFB6/MCCC1/PHB2/PMPCB/MRPL40/MRPL28/MRPL30/CHCHD3/UQCRB/MTX3/UQCRQ/IMMP2L/NDUFV1/MRPS7/TIMM13/MRPL47/HSD17B10/MRPL18/MRPL13/MRPS35/UQCRC2/MRPS17/MRPL48/MRPS11/MRPL52/MRPS34/PDHB/MRPL14/NSUN4/CHCHD6/SDHA/APOO/BCS1L/MRPL17/FOXRED1/MRPS18A/MRPL49/MRPL41/BCKDK/NDUFA11/NDUFB10/MRPL24/AGK/DAP3/NDUFC1/MRPL3/TOMM6/MRPL16/NDUFAB1/MRPL22/NDUFB3/NDUFA12/APOOL/ROMO1/MRPS22/COX6A1/MRPL15/UQCRC1/SDHD/NDUFB5/NDUFS2/TOMM40L/TIMM23/GRPEL2/MRPS18B/TOMM22/SDHC/NDUFA1/MRPL10/NDUFS5/COX4I1/MRPS36/NDUFS8/IMMT/NDUFS7/MRPL55/NDUFB11/MTX2/MRPL42/BCKDHB/MRPL46/MRPS5/MRPL32/NDUFA8/MRPL43/NDUFA2/NDUFV2/NDUFA7/MRPL51/NDUFC2/MRPS21/NDUFB7/MRPS26 |
| GOCC_RIBOSOMAL_SUBUNIT | GOCC_RIBOSOMAL_SUBUNIT | 173 | 0.507796505 | 2.30466869 | 1.00E-10 | 2.95E-08 | 2.27E-08 | 5655 | tags=63%, list=36%, signal=41% | RPS4Y1/ISG15/HBA2/RPS21/MRPS10/RPL39L/MRPL35/MCTS1/C12orf65/MRPS14/NSUN3/RPL7A/MRPS9/RPS26/MRPL1/MRPS28/RPSA/RPS7/RPL26/MRPL45/MRPL19/MRPL20/RPL23A/RPL37/RPL7/MRPL33/MRPS27/RPL35A/MRPL40/RPL13A/MRPL28/MRPL30/RPS23/RPS29/RPL8/RPL15/MRPS7/MRPL47/RPLP0/MRPL18/RPL34/RPL17/MRPL13/RPS3A/RPL41/MRPS35/MRPS17/MRPL48/MRPS11/MRPL52/MRPS34/RPS2/MRPL14/NSUN4/RPL29/MRPL17/MRPS18A/MRPL49/MRPL41/RPL9/MRPL24/RPL11/RPL36AL/DAP3/MRPL3/RPS15A/MRPL16/RPL3/DHX29/NDUFAB1/MRPL22/RPL21/RPL3L/RPS27A/RPS27L/RPS3/RPL31/RPS9/MRPS22/RPL27A/LARP4/MRPL15/RPS24/RPS12/MRPS18B/RPS8/RPL23/MRPL10/RPL22/MRPS36/RPL37A/RPL19/MRPL55/RPS17/RPL24/RPS15/MRPL42/MRPL46/MRPS5/RPS10/MRPL32/RPL6/MRPL43/MRPL51/RPL35/RPL10/RPL26L1/MRPS21/MRPS26 |
| GOCC_SYNAPTIC_MEMBRANE | GOCC_SYNAPTIC_MEMBRANE | 343 | -0.408653648 | -2.011483829 | 1.00E-10 | 2.95E-08 | 2.27E-08 | 3441 | tags=35%, list=22%, signal=28% | LRFN2/GABBR1/LRRTM4/CHRNB4/SLC16A3/PTPRS/GABRR2/NRXN1/TIAM1/CNTN2/GPHN/SCN2A/ADAM22/CNTN5/CHRNA7/GABRG3/GRIP1/KCNC1/ITGA8/CHRNB2/CALB2/CHRNA9/GABBR2/GRIN2D/CHRNA3/DRD3/GRIA2/DDN/GRM2/SHANK1/CNTNAP1/GLRA3/HTR3A/SYP/ITSN1/CHRNA4/GRIK4/DAGLA/CACNG5/P2RY1/STX1B/CHRNA6/STX1A/PTPRT/PCDH8/SNAP91/CLSTN2/ARC/P2RY4/CNIH3/DBN1/CBLN1/SLITRK1/SHANK3/NPTN/GABRA5/GRIK3/SLC6A4/KCNC2/KCTD16/DNM1/HTR3B/CDH8/SEMA4F/SLC30A1/GRM7/LZTS1/ERC2/APBA1/EFNB2/GLRA1/GRIK5/GABRB2/LRRTM2/SSPN/PTPRD/NLGN3/SLC8A3/LRRTM1/CHRM1/GRID1/GLRA2/GSG1L/SLC6A11/GABRR1/KCNA1/KCTD8/FAIM2/GABRD/GRM3/CHRM5/GHSR/NLGN1/DCC/CRYAB/ANK2/FLRT3/KCNC3/CACNG3/ATP2B4/SLITRK2/GABRA2/CHRNA10/RPH3A/SLC4A8/STX11/CDH10/CACNG7/SNCAIP/LRFN5/GABRB1/CACNG2/P2RX1/CPLX3/LRP4/GAD2/KCNK1/FOSL1/SLITRK3 |
| GOMF_DNA_BINDING_TRANSCRIPTION_ACTIVATOR_ACTIVITY | GOMF_DNA_BINDING_TRANSCRIPTION_ACTIVATOR_ACTIVITY | 424 | -0.399984182 | -2.009263603 | 1.00E-10 | 2.95E-08 | 2.27E-08 | 3586 | tags=35%, list=23%, signal=28% | ETV6/MIXL1/BARHL2/STAT5B/SP1/ZNF48/IRF5/LHX3/SP7/MEIS2/FOXJ3/DMRT1/GBX2/PITX3/PLAGL2/E2F3/BHLHA15/FOXJ1/EGR2/NKX2-5/NFIC/HOXA10/ALX1/TCF21/STAT6/ETV5/FOXJ2/DUX4/VENTX/JUND/ATF4/FOXI1/NEUROG3/SOX2/OTX1/TLX2/ISL1/NFKB1/SIX3/NFKB2/ATF6/CEBPB/SOX30/RELA/HOXD10/CDX4/MYCN/BACH1/PLAGL1/TFAP2A/SMARCD3/PRDM2/TCF15/HOXA9/HOXA5/GLIS2/TBX5/PRDM15/ZNF473/BARHL1/AIRE/SOX1/RAX/PLSCR1/PRDM16/IRX6/E2F4/NR5A2/ZNF300/STAT3/IRF4/ATOH1/ZNF574/ELK1/CASZ1/NFE2L2/PAX5/NR2E3/PTF1A/SOX21/CSRNP2/NKX2-2/GRHL1/POU3F2/CEBPE/HOXD8/TFAP2C/NFATC2/SIX4/FOXO3/GCM1/TFAP2B/GRHL2/ZNF786/PRRX1/ZNF750/GMEB2/EBF2/ZNF597/POU4F2/MLXIP/GATA3/HAND1/KLF10/IRF1/NKRF/ETV1/SMAD3/PHOX2B/POU4F1/TFAP4/RAX2/HOXB1/GFI1B/HOXA13/ALX4/WT1/CTCFL/GATA4/ATF3/SOX11/EPAS1/NR4A3/FOXC2/SRF/HOXD13/EGR3/MSX1/CREB3L3/JUN/POU4F3/SOX17/NHLH1/KLF6/MAFF/FOXO1/KLF5/ELF3/CEBPD/KLF4/FOXC1/FOSL2/NR4A2/NR4A1/MYC/FOSL1/JUNB/FOS/EGR1/FOSB |
| GOMF_ODORANT_BINDING | GOMF_ODORANT_BINDING | 98 | -0.642545823 | -2.626577574 | 1.00E-10 | 2.95E-08 | 2.27E-08 | 4522 | tags=73%, list=29%, signal=52% | OR10V1/OR10K1/OR5H15/OR5K1/OR14I1/OR8U1/OR5H1/OR8H1/OR2C1/OR5M3/OR13A1/OR8D4/OR6B2/OR10Z1/OR5A1/OR10K2/OR5AR1/OR8K1/OR6K3/OR5P2/OR5L1/GPR148/OR8A1/OR5M9/OR14C36/OR5AC2/OR6K2/OR5D14/OR5D18/OR5M11/OR5B3/OR5H14/OR6K6/OR8B8/OR5A2/OR10Q1/OR9K2/OR8J3/OR5D13/OR5M1/OR5C1/OR5M10/OR1K1/OR5B2/OR10T2/OR5AN1/OR8I2/OR5AK2/OR5AS1/OR5D16/OR10R2/OR8D1/OR5H2/OR12D3/OR6N2/OR5AU1/OR5AP2/OR4E2/OR8K5/OR5M8/OR8B3/OR5I1/OR8D2/OR11L1/OR5B21/OR5H6/OR5J2/OR5B12/OR5P3/OR14J1/OR2A7/OR13G1 |
| GOMF_OLFACTORY_RECEPTOR_ACTIVITY | GOMF_OLFACTORY_RECEPTOR_ACTIVITY | 344 | -0.624908829 | -3.074616839 | 1.00E-10 | 2.95E-08 | 2.27E-08 | 4522 | tags=65%, list=29%, signal=47% | OR10V1/OR7A17/OR10K1/OR1Q1/OR2T10/OR10G7/OR51F1/OR5H15/OR52R1/OR52B2/OR5K1/OR14I1/OR1J1/OR8U1/OR13D1/OR5H1/OR4D5/OR1E1/OR8H1/OR6N1/OR2C1/OR2D3/OR4X2/OR1B1/OR1A1/OR2L3/OR2A14/OR5M3/OR6C75/OR13A1/OR7E24/OR13C3/OR51T1/OR8D4/OR6B2/OR10Z1/OR4P4/OR6C6/OR2T4/OR5A1/OR10K2/OR10H1/OR5AR1/OR1C1/OR8K1/OR4K15/OR6P1/OR7C2/OR6K3/OR5P2/OR5L1/OR10H4/OR6C3/OR51G1/OR2AG2/GPR148/OR8S1/OR11H6/OR10A7/OR1N1/OR4K17/OR2Z1/OR10C1/OR8A1/OR1F1/OR2T1/OR6A2/OR5M9/OR2T11/OR56A1/OR14C36/OR5AC2/OR6K2/OR13H1/OR5D14/OR51I1/OR2T27/OR5D18/OR6M1/OR52N1/OR5M11/OR5B3/OR2A5/OR52E4/OR5H14/OR2G3/OR4A16/OR4A15/OR6S1/OR6K6/OR10G2/OR4K14/OR51I2/OR1L1/OR11A1/OR10G9/OR8B8/OR4C16/OR51D1/OR5A2/OR7A5/OR4F15/OR4N2/OR1L6/OR1N2/OR2G2/OR10Q1/OR5T2/OR51E1/OR9K2/OR8J3/OR5D13/OR5T3/OR5M1/OR5C1/OR2W1/OR5M10/OR52A5/OR1K1/OR5B2/OR51S1/OR6X1/OR10T2/OR2V2/OR5AN1/OR10P1/OR4C15/OR4L1/OR8I2/OR4D11/OR4X1/OR13F1/OR1J4/OR2L2/OR4D6/OR4A47/OR6C68/OR5AK2/OR2F1/OR4C6/OR4D10/OR4K1/OR10A6/OR1I1/OR10X1/OR5AS1/OR56B1/OR4C45/OR10G8/OR10A4/OR5D16/OR11G2/OR2AK2/OR10R2/OR6Y1/OR51B6/OR7D2/OR51A7/OR8D1/OR1S1/OR2K2/OR5H2/OR4C3/OR12D3/OR6N2/OR10H2/OR1L4/OR5AU1/OR4D1/OR13J1/OR52J3/OR4C13/OR5AP2/OR4E2/OR52N4/OR8K5/OR5M8/OR4D9/OR52K1/OR10A3/OR2B6/OR2G6/OR4A5/OR51V1/OR51F2/OR8B3/OR2H1/OR5I1/OR8D2/OR6C4/OR11L1/OR2L13/OR4K2/OR56A4/OR1M1/OR5B21/OR10H5/OR5H6/OR5J2/OR51Q1/OR2F2/OR5B12/OR5P3/OR4D2/OR2J3/OR14J1/OR5V1/OR4K5/OR52I2/OR6C1/OR2B2/OR2S2/OR2AE1/OR6Q1/OR7C1/OR2A7/OR4F29/OR2B11/OR2A42/OR13G1/OR4F4/OR1L3/OR4K13/OR2L8 |
| GOMF_STRUCTURAL_CONSTITUENT_OF_RIBOSOME | GOMF_STRUCTURAL_CONSTITUENT_OF_RIBOSOME | 150 | 0.512122908 | 2.290949309 | 1.00E-10 | 2.95E-08 | 2.27E-08 | 5617 | tags=64%, list=36%, signal=41% | RPS4Y1/RPS21/RPL39L/MRPL35/MRPS14/RPL7A/MRPS9/RPS26/MRPL1/RPSA/RPS7/RPL26/MRPL19/MRPL20/RPL23A/RPL37/RPL7/MRPL33/RPL35A/RPL13A/MRPL28/MRPL30/RPS23/RPS29/RPL8/RPL15/MRPS7/MRPL47/RPLP0/MRPL18/RPL34/RPL17/MRPL13/RPS3A/RPL41/MRPS35/SRBD1/MRPS17/MRPS23/MRPS11/MRPL52/MRPS34/RPS2/MRPL14/RPL29/MRPL17/MRPS18A/MRPL49/MRPL41/RPL9/MRPL24/RPL11/RPL36AL/DAP3/MRPL3/RPS15A/MRPL16/RPL3/MRPL22/RPL21/RPL3L/RPS27A/RPS27L/RPS3/RPL31/RPS9/MRPS22/RPL27A/MRPL15/RPS24/RPS12/MRPS18B/RPS8/RPL23/MRPL10/RPL22/MRPS36/RPL37A/RPL19/MRPL55/RPS17/RPL24/RPS15/MRPL42/MRPL46/MRPS5/RPS10/MRPL32/RPL6/MRPL43/NDUFA7/MRPL51/RPL35/RPL10/RPL26L1/MRPS21 |
| GOBP_SISTER_CHROMATID_SEGREGATION | GOBP_SISTER_CHROMATID_SEGREGATION | 164 | 0.495610219 | 2.240479003 | 1.28E-10 | 3.60E-08 | 2.77E-08 | 3572 | tags=48%, list=23%, signal=38% | NCAPG2/NUSAP1/HDAC8/TOP2A/NDC80/CDK5RAP2/CHMP4A/ANAPC7/DSN1/PTTG1/TUBG2/KIF22/MAD2L1/ZWINT/SMC2/TUBG1/STAG3/AXIN2/RACGAP1/BUB1/FEN1/ESCO2/CENPK/GEN1/CDC23/SMC4/IK/CHMP5/RAD51C/AURKB/NCAPD2/MIS12/CDT1/CHMP6/NCAPG/APC/KIFC1/STAG1/CHMP2A/NSMCE2/NEK2/TACC3/KATNB1/KLHL22/TRIP13/ESPL1/MAD2L2/PHB2/CTCF/KNTC1/XRCC3/PRC1/CHTF8/NUF2/TNKS/DYNC1LI1/RB1/ANAPC11/ATRX/ESCO1/ANAPC5/CDC20/DLGAP5/RIOK2/BUB3/VPS4B/STAG2/CDC6/PSMG2/INCENP/NSL1/CHMP1A/CDC16/LCMT1/NCAPD3/ATM/CTNNB1/CENPE/DSCC1 |
| GOMF_RECEPTOR_REGULATOR_ACTIVITY | GOMF_RECEPTOR_REGULATOR_ACTIVITY | 459 | -0.376315798 | -1.909131507 | 1.93E-10 | 5.22E-08 | 4.02E-08 | 3328 | tags=35%, list=21%, signal=28% | CLEC12A/IL13/OGN/CRH/TGFA/C1QTNF9/GH2/CCL24/CXCL3/BMP3/IFNA2/NPPA/WNT10B/IL17B/IL17D/IL4/SPINT3/NTF3/RLN1/IFNG/PNOC/GALP/CCL23/PRL/TNFSF11/CCL22/SECTM1/FGF8/IL17F/EREG/OSTN/NPPC/FGF4/ADIPOQ/HAMP/GHRL/ESR2/IFNA21/MSTN/IL12A/SEMA6A/SEMA3C/SEMA6C/CARTPT/FGF6/DEFB103A/TNFSF9/VIP/ARTN/TFF1/RETN/TGFB2/WNT7B/CCL11/FGF22/DKK1/FGF10/UCN3/SEMA3D/CCL8/NPY/PDGFC/TG/IFNA14/OSGIN2/WFIKKN2/FGF5/BMP6/WNT3A/IL24/CCL25/CSF1/SEMA4F/IFNA8/CXCL5/PGF/SEMA3B/CX3CL1/CTF1/AMELX/PDYN/PDGFB/CCL20/IL11/GHRH/BMP15/CDC42EP2/SEMA3A/SST/IL1A/NDP/BMP2/JAG1/TGFB1/LEP/PYY/CCL3L3/NTF4/DKK4/METRNL/EFNA5/VEGFA/CXCL6/PPY/IGF1/INSL3/CCL21/SEMA4A/PENK/FLRT3/GDF3/PROK1/C10orf99/STC2/CCL26/THPO/EBI3/CXCL13/EPO/RETNLB/CSF3/FGF9/VEGFC/ADM/GREM2/IL20/TRH/CCL3/TNFSF14/ANGPT4/CCL7/WNT3/SCGB3A1/SEMA4B/ADCYAP1/ASIP/NAMPT/KL/IL10/IL1RN/OSM/GDF5/EDN3/FST/CALCA/STC1/CXCL2/DAND5/IL1B/FGF14/CXCL1/INHBB/EDN1/HBEGF/LIF/TGFB3/CMTM2/CLCF1/CCL2/IL6 |
| GOBP_CHROMOSOME_SEGREGATION | GOBP_CHROMOSOME_SEGREGATION | 263 | 0.419900015 | 2.010096768 | 4.19E-10 | 1.09E-07 | 8.38E-08 | 4615 | tags=50%, list=30%, signal=36% | NCAPG2/NUSAP1/HDAC8/TOP2A/NDC80/CDK5RAP2/CHMP4A/ANAPC7/DSN1/PTTG1/KLHDC8B/BRCA1/TUBG2/KIF22/MAD2L1/ZWINT/CENPQ/SMC2/TUBG1/SKA2/STAG3/AXIN2/RACGAP1/RCC1/BUB1/FEN1/SMC6/ESCO2/CENPK/GEN1/CDC23/SMC4/IK/CHMP5/RAD51C/AURKB/NCAPD2/MIS12/CDT1/CHMP6/OIP5/NCAPG/APC/KIFC1/STAG1/NUP43/SMARCAD1/CHMP2A/NSMCE2/NEK2/TACC3/KATNB1/KLHL22/TRIP13/NUP37/ECT2/ESPL1/UVRAG/MAD2L2/PHB2/CTCF/KNTC1/XRCC3/PRC1/CHTF8/NUF2/CENPH/HJURP/ACTR2/MLH1/TNKS/DYNC1LI1/RB1/ANAPC11/ATRX/RAD18/ESCO1/DYNC1H1/ANAPC5/CDC20/NR3C1/DLGAP5/RIOK2/RMI1/BUB3/VPS4B/STAG2/CDC6/PSMG2/CENPN/INCENP/NSL1/ERCC4/CHMP1A/CDC16/LCMT1/NCAPD3/ATM/CTNNB1/CENPE/EME1/DSCC1/BECN1/ANAPC4/ZW10/DDX11/CDC27/SRPK1/CHMP2B/PUM2/FBXW7/FANCM/RPS3/KIF2C/SKA1/TLK2/CSNK2A2/SPC25/CDCA5/SETDB2/CHFR/TTN/RIOK3/MKI67/TTK/CDC42/PDS5B/CUL3/TTL/PUM1/CDC26 |
| GOCC_INTRINSIC_COMPONENT_OF_SYNAPTIC_MEMBRANE | GOCC_INTRINSIC_COMPONENT_OF_SYNAPTIC_MEMBRANE | 132 | -0.527065058 | -2.276335547 | 5.63E-10 | 1.40E-07 | 1.08E-07 | 3441 | tags=43%, list=22%, signal=34% | LRFN2/SLC16A3/PTPRS/CNTN2/GPHN/SCN2A/ADAM22/CNTN5/GABRG3/CHRNA9/DRD3/GRM2/HTR3A/GRIK4/DAGLA/CACNG5/P2RY1/STX1A/PTPRT/PCDH8/CLSTN2/P2RY4/SLITRK1/NPTN/GABRA5/SLC6A4/SLC30A1/EFNB2/GLRA1/GRIK5/GABRB2/LRRTM2/PTPRD/NLGN3/SLC8A3/LRRTM1/CHRM1/GRID1/GSG1L/SLC6A11/KCNA1/GRM3/GHSR/NLGN1/DCC/FLRT3/CACNG3/ATP2B4/SLITRK2/CHRNA10/CDH10/CACNG7/LRFN5/CACNG2/P2RX1/CPLX3/SLITRK3 |
| GOBP_VASCULAR_PROCESS_IN_CIRCULATORY_SYSTEM | GOBP_VASCULAR_PROCESS_IN_CIRCULATORY_SYSTEM | 232 | -0.441458687 | -2.07511711 | 9.61E-10 | 2.26E-07 | 1.74E-07 | 3343 | tags=40%, list=21%, signal=32% | AKT1/ACE/FGG/SLC16A1/TJP2/AGER/GCLM/NPPA/SMTNL2/FGA/EGFR/OXTR/SLC7A5/SOD2/INSR/HRH2/ABCC1/SLC38A1/P2RY1/KCNMB4/SLC16A12/SLCO1C1/SLC6A20/GCH1/CAV1/ADRA1D/SLC12A2/AGTR1/SLC24A3/KEL/SLC6A4/SLC29A4/SLC6A6/SLC5A6/DBH/SLC38A2/BMP6/DRD5/TBXA2R/TRPM4/AVPR1A/SLC9A3R1/SLC38A3/SLC6A17/TFRC/LRP2/SLC27A1/AZU1/SLC22A3/ECE1/ACTA2/PDE3A/ATP1B2/TGFB1/ADRB1/LEP/SLC16A7/KLF2/VEGFA/ATP1A2/ADRB3/CEACAM1/SLC1A4/CRP/KCNA5/LEPR/ATP2B4/NOS1/SLC4A8/GJA1/PER2/NOS3/ADM/ADRB2/GPR4/SLC5A1/ICAM1/AKAP12/FOXC2/P2RX1/SLC7A1/SLC7A2/SLC22A8/EDN3/CALCA/SLC2A3/SLC8A2/EDN1/C2CD4A/RGS2/SCNN1B/FOXC1/C2CD4B |
| GOBP_PROTEASOMAL_PROTEIN_CATABOLIC_PROCESS | GOBP_PROTEASOMAL_PROTEIN_CATABOLIC_PROCESS | 431 | 0.36796172 | 1.858730022 | 9.74E-10 | 2.26E-07 | 1.74E-07 | 5244 | tags=49%, list=34%, signal=34% | IFI27/CEBPA/UBXN2B/ANAPC7/TREM2/NUPR1/PTTG1/PSMD10/FBXO27/FBXO2/NHLRC1/MAD2L1/SGTB/AURKA/MAPK9/PBK/SKP2/PSMB9/PSMA2/CCNF/MTM1/ALAD/FBXO48/BAG2/DERL2/PSMB7/CDC23/LRRK2/SMAD7/EDEM3/PSME2/CLOCK/FZR1/PSMD14/OS9/AURKB/SEL1L/KEAP1/SPOP/FBXO6/RNF185/PSMA4/LAMP3/RFPL1/PSMD4/ATXN3/XPO1/HFE/STUB1/RNF121/PSMD7/RNF186/RNF14/PSMD1/DNAJB14/AMFR/RNF144B/KLHL22/PSMA3/SDF2L1/DNAJC10/DET1/CUL5/BRSK2/HSPA5/ERCC8/DERL3/PSMD13/NHLRC3/CDC34/SKP1/PCNP/GIPC1/BTRC/PSEN1/EIF3H/MAEA/FBXO22/RBX1/STT3B/BFAR/GABARAPL2/PSMD11/AMN1/FBXL4/FBXL5/UBR3/EDEM2/TMTC3/ANAPC11/UBXN2A/UBE2H/RNF139/SDCBP/HACE1/TRIM9/FBXL17/ZFAND2B/PSMA1/ANAPC5/KAT5/CDC20/PSMB10/RNF5/HSP90AB1/SMURF2/SUMO1/PSMC6/PSMB5/TMF1/PARK7/BUB3/TAF1/ARMC8/GLMN/PRKACA/PSMC4/ANAPC2/RNF216/NUB1/RNF34/SVIP/PSMC3/WFS1/FBXO4/FBXW5/CDC16/DDRGK1/NEDD4/AGAP3/SPOPL/PSME1/UBE2E1/VCP/CTNNB1/PSMB1/TTC36/RPL11/PSMD2/CRBN/RMND5A/TMUB2/FHIT/FBXO38/IL33/ZNRF1/SPSB2/ERLIN2/GNA12/MAN1B1/PPP2R5C/FBXO17/PSMA5/RCN3/ANAPC4/ANAPC10/NSFL1C/RPS27A/CDC27/FBXW7/UBR1/UBE2V2/ARNTL/FBXL18/CAMLG/PSMC5/TLK2/CUL1/USP7/CHFR/HERPUD1/UBXN8/RNFT1/RMND5B/TBL1XR1/PSMB8/RBCK1/DDIT3/USP5/CUL3/PSMB4/CDC26/UBAC2/UBE4B/UBR2/PRPF19/FBXL14/CSNK1A1/STYX/SH3RF2/ATE1/SOCS6/CCDC47/PSMD6/RHBDD1/FBXW8/CD2AP/KLHL20/UBE2G1/PLK2/DNAJB9/ARRB2/FBXL3/PSMA6/FBXL7/UBB/APOE/FBXL19/ANKZF1/ARIH2/F8A2/KCTD5/FBXW4 |
| GOCC_CHROMOSOMAL_REGION | GOCC_CHROMOSOMAL_REGION | 264 | 0.419588839 | 2.006512858 | 1.46E-09 | 3.27E-07 | 2.52E-07 | 4727 | tags=52%, list=30%, signal=37% | MSH2/TOP2A/NDC80/DSN1/MCM5/ITGB3BP/KIF22/MAD2L1/PCNA/CHEK1/ZWINT/CENPQ/RAD51AP1/SS18L1/SKA2/STAG3/NUDCD2/BUB1/FEN1/SMC6/POLD1/MCM6/ESCO2/MCM2/CENPK/SMC4/ZWILCH/AURKB/NCAPD2/SEC13/CDC73/MIS12/CDT1/DAXX/THOC3/UHRF2/OIP5/NCAPG/APC/SSB/XPO1/DYNLT3/STAG1/NUP43/CBX1/PPP1CA/NSMCE2/NEK2/HELLS/CFDP1/THOC5/DCTN5/PPP1CB/TP53BP1/RAD17/CBX5/NUP37/CLASP2/PSEN2/UVRAG/SPC24/CTCF/KNTC1/XRCC3/POLR2B/PSEN1/PPP1R12A/NUF2/CENPH/NSMCE4A/HJURP/PHF6/PPP2R5A/TOX4/IKZF1/TNKS/DYNC1LI1/LIG4/NUP85/CENPM/ATRX/DYNLL1/APEX1/PPP1CC/CHEK2/BUB3/CENPL/DCLRE1B/SUV39H1/STAG2/SMG6/POT1/CENPN/XRCC5/KAT2B/INCENP/NSL1/ERCC4/ZBTB48/XRCC1/NCAPD3/RNF8/ATM/PAFAH1B1/CENPE/DSCC1/NSMCE1/PPP2R5C/SETX/DCTN4/ZW10/DCTN6/MCM4/KIF2C/SKA1/CENPI/DPY30/RPA1/RAD50/PTGES3/THOC2/SPC25/CDCA5/TNKS2/SP100/SUGT1/DNMT3A/RECQL4/TTK/DCTN3/PDS5B/CBX3/HAT1/SUV39H2/MCM3/CLIP1/MAD1L1/PDS5A |
| GOBP_STEROL_BIOSYNTHETIC_PROCESS | GOBP_STEROL_BIOSYNTHETIC_PROCESS | 66 | 0.620946695 | 2.389864187 | 1.76E-09 | 3.73E-07 | 2.88E-07 | 2912 | tags=47%, list=19%, signal=38% | CYP7A1/GPAM/SQLE/PRKAA2/HMGCS1/CYB5R2/MVK/FDFT1/ELOVL6/LSS/IDI1/PMVK/TM7SF2/MVD/SEC14L2/CFTR/NFYB/NSDHL/CYB5R1/EBP/ARV1/APOA5/CYP51A1/HMGCR/FASN/SCD/INSIG2/DHCR7/NFYA/SREBF2/ACAT2 |
| GOBP_RESPONSE_TO_CORTICOSTEROID | GOBP_RESPONSE_TO_CORTICOSTEROID | 148 | -0.503264692 | -2.213260443 | 1.79E-09 | 3.73E-07 | 2.88E-07 | 2612 | tags=36%, list=17%, signal=30% | PCK1/HNRNPU/ASS1/ISL1/ADIPOQ/AGXT/SOX30/SSTR5/MSTN/CSN1S1/HEY1/ANXA3/TH/SRD5A1/CNGA3/UCN3/GPR83/BMP6/SLIT3/AVPR1A/DUSP1/CPN1/TPH2/FLT3/KLF9/GOT1/SGK1/GHSR/ZFP36L2/BCL2L11/ALPL/TFAP4/EPO/CDKN1A/ADM/TRH/ICAM1/ADCYAP1/SCGB1A1/IL10/IL1RN/PAPPA/STC1/FOXO1/EDN1/SCNN1B/ZFP36/IGFBP2/FAM107A/FOSL1/FOS/IL6/FOSB |
| GOCC_MICROBODY | GOCC_MICROBODY | 115 | 0.524561932 | 2.263387083 | 2.71E-09 | 5.50E-07 | 4.23E-07 | 3972 | tags=53%, list=26%, signal=40% | DDO/FNDC5/DAO/MVK/AMACR/ACBD5/IDI1/MGST1/IDH1/PMVK/PEX3/TMEM135/FIS1/IDE/CRYM/ACOT8/ACAA1/HAO1/NUDT7/PHYH/SYT7/FAR2/SCP2/HACL1/MYO5A/PEX12/ABCD2/PEX11B/NUDT12/HMGCR/HSDL2/TTC1/CROT/EHHADH/PEX14/ABCD3/GNPAT/PRDX5/TYSND1/MFF/PEX5/PAOX/PEX1/PEX7/PIPOX/DNM1L/PECR/HMGCL/PEX11A/AGPS/ALDH3A2/PXMP4/PEX16/ACOX2/CAT/TKT/XDH/ECH1/SERHL2/ATAD1/IDH2 |
| GOBP_MULTI_MULTICELLULAR_ORGANISM_PROCESS | GOBP_MULTI_MULTICELLULAR_ORGANISM_PROCESS | 186 | -0.459213519 | -2.101805196 | 3.69E-09 | 7.25E-07 | 5.59E-07 | 3156 | tags=35%, list=20%, signal=28% | MMP9/ACVR1C/NPPA/PSG9/OXTR/RLN1/PNOC/PRL/SYDE1/TAC3/ACVR1B/COL16A1/GHRL/ANGPT2/UMPS/PSG11/POLR1B/PSG2/VDR/PRLHR/KLK14/ITGB4/SLC6A4/KALRN/EPOR/SLC38A2/AVPR1A/SLC38A3/ACR/TGFBR2/TEAD3/LEP/MMP2/DHODH/VEGFA/PSG1/PRDM14/GHSR/CYP1A1/STC2/EPO/CYP27B1/GJA1/ADM/TAC1/ADCYAP1/SCGB1A1/P2RX1/B4GALT1/PAPPA/CALCA/STC1/IL1B/THBD/MAFF/EDN1/RGS2/LIF/TGFB3/PZP/IGFBP2/FOSL1/JUNB/FOS/FOSB |
| GOCC_INTRINSIC_COMPONENT_OF_POSTSYNAPTIC_MEMBRANE | GOCC_INTRINSIC_COMPONENT_OF_POSTSYNAPTIC_MEMBRANE | 98 | -0.568708838 | -2.324749185 | 5.07E-09 | 9.66E-07 | 7.44E-07 | 3441 | tags=46%, list=22%, signal=36% | LRFN2/SLC16A3/PTPRS/CNTN2/ADAM22/CHRNA9/DRD3/GRM2/HTR3A/GRIK4/DAGLA/CACNG5/PTPRT/PCDH8/CLSTN2/SLITRK1/NPTN/GABRA5/SLC6A4/SLC30A1/GLRA1/GRIK5/GABRB2/LRRTM2/NLGN3/SLC8A3/LRRTM1/CHRM1/GRID1/GSG1L/SLC6A11/KCNA1/GRM3/NLGN1/DCC/FLRT3/CACNG3/SLITRK2/CHRNA10/CDH10/CACNG7/LRFN5/CACNG2/P2RX1/SLITRK3 |
| GOBP_NUCLEOSIDE_BISPHOSPHATE_METABOLIC_PROCESS | GOBP_NUCLEOSIDE_BISPHOSPHATE_METABOLIC_PROCESS | 124 | 0.508593011 | 2.208460219 | 6.07E-09 | 1.12E-06 | 8.66E-07 | 3173 | tags=48%, list=20%, signal=38% | GPAM/ACOT12/PDP2/HMGCS1/MVK/DBI/ELOVL6/SULT1E1/SLC35B3/ACSS2/PMVK/ACOT1/MVD/ELOVL2/PANK1/DLD/ACOT9/SULT2A1/DGAT1/SUCLG2/ACOT8/ACSM2B/NUDT7/ELOVL1/ACSM1/PAPSS1/ACSM5/SUCLA2/FAR2/SULT1B1/BPNT1/GLYAT/PANK3/PDHA1/ACSM3/HMGCR/HSD17B8/DCAKD/CROT/PAPSS2/COASY/PANK2/ELOVL5/ACSF2/FASN/SCD/SLC25A1/PPCS/DIP2A/PPT1/ACBD6/PIPOX/SLC26A1/HMGCL/PDHB/MCEE/CBR4/SULT1C2/DGAT2 |
| GOCC_POSTSYNAPTIC_MEMBRANE | GOCC_POSTSYNAPTIC_MEMBRANE | 244 | -0.427741189 | -2.021754813 | 7.42E-09 | 1.34E-06 | 1.03E-06 | 4582 | tags=48%, list=29%, signal=35% | ITGB3/CACNA1C/CNKSR2/KCND3/GABRP/CACNG8/GABRA6/PRR7/IGSF21/ARRB1/GABRA1/PDLIM4/GRIN3A/NRP2/KCND2/SEMA4C/SHANK2/GRIK1/HTR5A/ACTN2/SLC6A3/GRIN2C/DLG4/CHRNA5/DRD2/CHRNG/GRIN1/SLC6A9/LRFN2/GABBR1/LRRTM4/CHRNB4/SLC16A3/PTPRS/GABRR2/TIAM1/CNTN2/GPHN/ADAM22/CHRNA7/GABRG3/GRIP1/CHRNB2/CHRNA9/GABBR2/GRIN2D/CHRNA3/DRD3/GRIA2/DDN/GRM2/SHANK1/GLRA3/HTR3A/CHRNA4/GRIK4/DAGLA/CACNG5/P2RY1/CHRNA6/PTPRT/PCDH8/CLSTN2/ARC/CNIH3/DBN1/CBLN1/SLITRK1/SHANK3/NPTN/GABRA5/GRIK3/SLC6A4/KCNC2/KCTD16/DNM1/HTR3B/SEMA4F/SLC30A1/GRM7/LZTS1/GLRA1/GRIK5/GABRB2/LRRTM2/SSPN/NLGN3/SLC8A3/LRRTM1/CHRM1/GRID1/GLRA2/GSG1L/SLC6A11/GABRR1/KCNA1/KCTD8/FAIM2/GABRD/GRM3/CHRM5/NLGN1/DCC/ANK2/FLRT3/KCNC3/CACNG3/SLITRK2/GABRA2/CHRNA10/RPH3A/CDH10/CACNG7/LRFN5/GABRB1/CACNG2/P2RX1/SLITRK3 |
| GOBP_NUCLEAR_CHROMOSOME_SEGREGATION | GOBP_NUCLEAR_CHROMOSOME_SEGREGATION | 210 | 0.439856388 | 2.060766492 | 7.89E-09 | 1.38E-06 | 1.07E-06 | 3572 | tags=42%, list=23%, signal=33% | NCAPG2/NUSAP1/HDAC8/TOP2A/NDC80/CDK5RAP2/CHMP4A/ANAPC7/DSN1/PTTG1/KLHDC8B/TUBG2/KIF22/MAD2L1/ZWINT/CENPQ/SMC2/TUBG1/STAG3/AXIN2/RACGAP1/BUB1/FEN1/ESCO2/CENPK/GEN1/CDC23/SMC4/IK/CHMP5/RAD51C/AURKB/NCAPD2/MIS12/CDT1/CHMP6/NCAPG/APC/KIFC1/STAG1/CHMP2A/NSMCE2/NEK2/TACC3/KATNB1/KLHL22/TRIP13/ECT2/ESPL1/MAD2L2/PHB2/CTCF/KNTC1/XRCC3/PRC1/CHTF8/NUF2/ACTR2/MLH1/TNKS/DYNC1LI1/RB1/ANAPC11/ATRX/ESCO1/DYNC1H1/ANAPC5/CDC20/DLGAP5/RIOK2/RMI1/BUB3/VPS4B/STAG2/CDC6/PSMG2/INCENP/NSL1/ERCC4/CHMP1A/CDC16/LCMT1/NCAPD3/ATM/CTNNB1/CENPE/EME1/DSCC1 |
| GOBP_POSITIVE_REGULATION_OF_PRI_MIRNA_TRANSCRIPTION_BY_RNA_POLYMERASE_II | GOBP_POSITIVE_REGULATION_OF_PRI_MIRNA_TRANSCRIPTION_BY_RNA_POLYMERASE_II | 40 | -0.696557109 | -2.417473099 | 1.11E-08 | 1.90E-06 | 1.47E-06 | 1398 | tags=40%, list=9%, signal=36% | STAT3/PDGFB/FOXO3/BMP2/TGFB1/GATA3/SMAD3/WT1/SRF/IL10/JUN/KLF5/KLF4/FOSL1/FOS/EGR1 |
| GOBP_ANTIGEN_PROCESSING_AND_PRESENTATION_OF_PEPTIDE_ANTIGEN | GOBP_ANTIGEN_PROCESSING_AND_PRESENTATION_OF_PEPTIDE_ANTIGEN | 184 | 0.446273254 | 2.047418731 | 1.91E-08 | 3.17E-06 | 2.44E-06 | 4943 | tags=57%, list=32%, signal=39% | TREM2/PSMD10/KIF22/ERAP1/AP1S1/RACGAP1/HLA-DRB3/PSMB9/PSMA2/MR1/PSMB7/DYNC1I2/IDE/PSME2/CD36/PSMD14/SEC13/HLA-DMA/PSMA4/HLA-DMB/PSMD4/VAMP8/VAMP3/KIF3A/SEC24A/HFE/SEC24D/CLEC4M/IKBKB/SEC23A/PSMD7/KIFAP3/PSMD1/CLTA/DCTN5/PDIA3/HLA-F/PSMA3/TAP2/TAPBPL/ACTR10/PSMD13/CLEC4A/AP2B1/PSMD11/KIF3B/SEC31A/KIF11/DYNC1LI1/TAPBP/CLTC/DYNLL1/SNAP23/DYNC1H1/PSMA1/HLA-DOA/PSMB10/PSMC6/PSMB5/CALR/HLA-A/SAR1B/PSMC4/FCGR2B/B2M/PSMC3/PSME1/CENPE/PSMB1/PSMD2/ITGAV/MFSD6/HLA-DPA1/SEC24C/DCTN4/NCF2/PSMA5/DCTN6/HLA-DQB1/KIF2A/SEC24B/KIF2C/HLA-B/IFI30/PSMC5/CTSF/AP1B1/PYCARD/DYNLL2/PSMB8/DCTN3/CYBB/KLC1/ACTR1A/PSMB4/CTSD/CTSS/HLA-DQA1/AP2S1/AP2M1/CANX/CD74/PSMD6/HLA-DRA |
| GOBP_MUSCLE_CELL_PROLIFERATION | GOBP_MUSCLE_CELL_PROLIFERATION | 168 | -0.456429418 | -2.043124602 | 2.01E-08 | 3.25E-06 | 2.50E-06 | 1531 | tags=23%, list=10%, signal=21% | CX3CL1/NOX1/PDGFB/AKIRIN1/TGFBR2/EPHB1/MMP2/TGM2/FOXP1/IGF1/HES5/ELN/TGFBR3/GATA6/TNFAIP3/CDH13/TRIB1/GJA1/CDKN1A/FGF9/TCF7L2/NR4A3/FOXC2/IL10/JUN/ERN1/CNN1/PPARGC1A/APOD/EDN1/PIM1/HBEGF/THBS1/KLF4/TGFB3/FOXC1/ADAMTS1/IL6 |
| GOCC_KERATIN_FILAMENT | GOCC_KERATIN_FILAMENT | 69 | -0.60892046 | -2.341846963 | 2.17E-08 | 3.43E-06 | 2.65E-06 | 4622 | tags=72%, list=30%, signal=51% | KRT79/KRT82/KRT5/KRT76/KRT81/KRT3/KRT71/KRTAP5-11/KRT73/KRTAP4-11/KRTAP12-2/KRTAP10-9/KRTAP10-7/KRTAP10-8/KRT84/KRTAP4-2/KRT74/KRTAP12-4/KRT77/KRT6B/KRTAP10-4/KRT85/KRTAP4-5/KRTAP4-12/KRTAP5-6/KRTAP5-7/KRTAP5-1/KRTAP9-3/KRTAP5-10/KRTAP10-11/KRTAP5-4/KRTAP10-10/KRTAP9-4/KRTAP10-3/KRTAP12-1/KRTAP10-1/KRT13/KRTAP4-1/KRT7/CASP14/KRTAP5-9/KRTAP5-2/KRT6A/KRTAP1-3/KRTAP4-4/KRT4/KRTAP5-3/KRT80/KRT72/KRTAP3-2 |
| GOBP_RESPONSE_TO_STEROID_HORMONE | GOBP_RESPONSE_TO_STEROID_HORMONE | 307 | -0.389511745 | -1.900279521 | 2.46E-08 | 3.77E-06 | 2.91E-06 | 3034 | tags=31%, list=20%, signal=25% | TCF21/EGFR/ATP1A1/OXTR/DDX5/PCK1/HNRNPU/ASS1/YAP1/ISL1/ZBTB7A/CRY1/NCOA1/SIRT1/ADIPOQ/AGXT/SOX30/SSTR5/ESR2/RELA/MSTN/CSN1S1/HEY1/ANXA3/CAV1/ABHD2/TH/SRD5A1/TGFB2/ZMIZ1/CNGA3/UCN3/GPR83/BMP6/SLIT3/AVPR1A/NCOR1/CST11/ACR/LMO3/TRERF1/NR2E3/DDX54/NKX2-2/NKX3-1/DUSP1/PMEPA1/TGFBR2/CPN1/TPH2/WBP2/FLT3/KLF9/SST/TGFB1/POU4F2/NPC1/AXIN1/LOX/SCGB2A1/FOXP1/GOT1/ATP1A2/SGK1/GHSR/ZFP36L2/BCL2L11/ALPL/TFAP4/EPO/CDKN1A/ADM/TRH/ICAM1/NR4A3/GABRB1/ADCYAP1/SCGB1A1/IL10/IL1RN/PAPPA/STC1/NR1D1/FOXO1/EDN1/SCNN1B/THBS1/TGFB3/ZFP36/IGFBP2/FAM107A/FOSL1/FOS/IL6/FOSB |
| GOBP_MITOCHONDRIAL_TRANSLATION | GOBP_MITOCHONDRIAL_TRANSLATION | 118 | 0.510387968 | 2.212434301 | 2.50E-08 | 3.77E-06 | 2.91E-06 | 5655 | tags=62%, list=36%, signal=40% | RMND1/GFM2/WARS2/LARS2/MRPS10/MRPL35/MTRF1/MRPS14/NSUN3/MRPS9/MRPL1/MRPS28/RPUSD3/MRPL45/MRPL19/MRPL20/MRPL33/MRPS27/RARS2/YARS2/MRPL40/MTIF3/MRPL28/MRPL30/CHCHD1/MRPS7/MRPL47/MRPL18/MRPL13/MRPS35/MRPS17/MRPS23/MRPL48/MRPS11/MRPL52/MRPS34/TSFM/MRPL14/MRPL17/MRPS18A/MRPL49/MRPL41/MRPL24/DAP3/MRPL3/MRPL16/MRPL22/DARS2/FASTKD2/MRPS22/MRPL15/LRPPRC/OXA1L/MRPS18B/TACO1/MRPL10/RPUSD4/MRPS36/MRRF/MRPL55/CDK5RAP1/MRPL42/C1QBP/QRSL1/MRPL46/AARS2/MRPS5/MRPL32/MRPL43/NDUFA7/MRPL51/MRPS21/MRPS26 |
| GOBP_ESTABLISHMENT_OF_PROTEIN_LOCALIZATION_TO_ENDOPLASMIC_RETICULUM | GOBP_ESTABLISHMENT_OF_PROTEIN_LOCALIZATION_TO_ENDOPLASMIC_RETICULUM | 110 | 0.511597634 | 2.195929205 | 3.04E-08 | 4.49E-06 | 3.46E-06 | 4725 | tags=54%, list=30%, signal=38% | RPS4Y1/CHMP4A/RPS21/SPCS2/SGTB/SSR3/RPL7A/RPS26/SEC61G/SEC61A2/RPSA/RPS7/SRP14/RPL26/RPL23A/RPL37/RPL7/HSPA5/RPL35A/RPL13A/RPS23/RPS29/RPL8/RPL15/RPLP0/RPL34/SPCS3/RPL17/RPS3A/RPL41/RAB10/ZFAND2B/RPS2/SRP9/RAB3GAP2/SRP54/RPL29/RPL9/RPL11/RPS15A/RPL3/TRAM1/RPL21/RPS27A/RPS3/RPL31/SEC63/RPS9/RPL27A/RPS24/SRP72/RPS12/HERPUD1/RPS8/SRP68/RPL23/SEC62/RPL22/TRAM1L1 |
| GOCC_RIBOSOME | GOCC_RIBOSOME | 204 | 0.434071674 | 2.023288952 | 3.54E-08 | 5.10E-06 | 3.93E-06 | 4558 | tags=47%, list=29%, signal=34% | RPS4Y1/ISG15/HBA2/RPS21/MRPS10/RPL39L/MRPL35/MCTS1/C12orf65/MRPS14/NSUN3/RPL7A/MRPS9/RPS26/MRPL1/MRPS28/RPSA/SERP1/RPS7/RPL26/MRPL45/MRPL19/MRPL20/RPL23A/RPL37/RPL7/MRPL33/MRPS27/RPL35A/EIF2AK2/MRPL40/RPL13A/MRPL28/EIF3H/MRPL30/RPS23/RPS29/RPL8/CHCHD1/RPL15/MRPS7/MRPL47/RPLP0/MRPL18/RPL34/NCK1/RPL17/MRPL13/RPS3A/RPL41/MRPS35/APEX1/MRPS17/MRPS23/MRPL48/MRPS11/MRPL52/MRPS34/RPS2/MRPL14/NSUN4/RPL29/MRPL17/MRPS18A/MRPL49/MRPL41/RPL9/MRPL24/RPL11/RPL36AL/DAP3/MRPL3/RPS15A/MRPL16/RPL3/DHX29/NDUFAB1/MRPL22/RPL21/RPL3L/RPS27A/RPS27L/RPS3/RPL31/RPS9/MRPS22/RPL27A/LARP4/MRPL15/RPS24/RPS12/DHX9/MRPS18B/RPS8/SRP68/RPL23 |
| GOBP_REGULATION_OF_CHOLESTEROL_METABOLIC_PROCESS | GOBP_REGULATION_OF_CHOLESTEROL_METABOLIC_PROCESS | 54 | 0.633086924 | 2.334263588 | 4.00E-08 | 5.64E-06 | 4.35E-06 | 2900 | tags=44%, list=19%, signal=36% | CYP7A1/GPAM/SQLE/HMGCS1/MVK/FDFT1/ELOVL6/LSS/IDI1/PMVK/TM7SF2/MVD/SEC14L2/NFYB/ACADL/ARV1/CYP51A1/HMGCR/NR1H4/FASN/SCD/DHCR7/NFYA/SREBF2 |
| GOMF_PASSIVE_TRANSMEMBRANE_TRANSPORTER_ACTIVITY | GOMF_PASSIVE_TRANSMEMBRANE_TRANSPORTER_ACTIVITY | 430 | -0.348228106 | -1.751649588 | 4.26E-08 | 5.87E-06 | 4.52E-06 | 4579 | tags=44%, list=29%, signal=32% | CACNA1C/GJD3/TRPV5/KCNAB3/KCNK15/KCND3/GABRP/TRPM5/CACNG8/GABRA6/CLIC6/KCNH4/SLC26A7/CACNA1F/GABRA1/GJA3/ATP6V0C/GRIN3A/KCND2/GJD2/KCNQ2/SCN3A/KCNQ4/GRIK1/CNGA1/CLCA4/CLIC5/KCNK12/KCNA4/GRIN2C/CHRNA5/BEST1/KCNA2/NOX5/CACNA1B/SLC26A9/CHRNG/TMEM63C/AQP2/GRIN1/LRRC52/HTR3D/KCNG1/GJA10/ORAI2/KCNJ13/CACNB1/LRRC55/SLC4A11/KCNK10/KCNG3/KCNN2/KCNIP4/CLCNKA/SCN10A/PANX2/SCNN1G/CHRNB4/KCNJ9/HTR3E/GABRR2/CACNA1A/SCN2A/TTYH1/HCN2/CNGA2/GJB6/CHRNA7/CACNA1E/GABRG3/TOMM40/GJA8/KCNC1/CHRNB2/CHRNA9/TTYH3/GRIN2D/CHRNA3/BEST4/TRPM6/ABCC8/GRIA2/KCNK4/CACNA2D1/GLRA3/HTR3A/TRPV3/KCNJ12/CACNA1I/KCNJ1/CHRNA4/GRIK4/CACNG5/SCN5A/KCNMB4/CHRNA6/CACNG1/TRPV6/KCNJ14/RYR2/KCNMB1/PKD1L3/KCNK18/SCN2B/ANO7/OTOP3/AQP3/CACNA1G/CNGA3/GABRA5/CLCA1/CNGB3/SLC24A3/GRIK3/TRPA1/BEST2/CNGA4/KCNC2/SCN3B/KCNH6/PKD1L2/GJA9/HTR3B/TRPM4/KCNA10/KCNT1/KCNN3/CACNG6/KCNG2/KCNS1/KCNIP1/TMC5/NOX1/GLRA1/PANX1/GJC1/GRIK5/GJB3/GABRB2/PKD1L1/KCNS2/KCNJ6/GRID1/SCN1A/GLRA2/KCNB2/TPCN1/SCNN1A/OTOP2/GABRR1/KCNA1/SCN9A/KCNS3/SLC5A8/KCNH3/GJA4/TPCN2/BEST3/GABRD/CCT8L2/OTOP1/SLC1A4/KCNH5/KCNG4/KCNA5/TRPC1/SLC24A4/KCNC3/CNGB1/SLC24A2/CACNG3/RHAG/GABRA2/ITPR1/CHRNA10/GJA1/ORAI1/KCNE4/SLC26A8/CACNG7/SCN7A/LRRC8B/TRPM1/GABRB1/HCN4/CACNG2/P2RX1/TMC7/HTR3C/SCNN1B/KCNK1 |
| GOBP_MITOTIC_SISTER_CHROMATID_SEGREGATION | GOBP_MITOTIC_SISTER_CHROMATID_SEGREGATION | 140 | 0.48387098 | 2.149524972 | 5.04E-08 | 6.81E-06 | 5.24E-06 | 3572 | tags=47%, list=23%, signal=37% | NCAPG2/NUSAP1/NDC80/CDK5RAP2/CHMP4A/ANAPC7/DSN1/PTTG1/TUBG2/KIF22/MAD2L1/ZWINT/SMC2/TUBG1/RACGAP1/BUB1/CENPK/GEN1/CDC23/SMC4/IK/CHMP5/AURKB/NCAPD2/MIS12/CDT1/CHMP6/NCAPG/APC/KIFC1/CHMP2A/NSMCE2/NEK2/TACC3/KATNB1/KLHL22/TRIP13/ESPL1/MAD2L2/KNTC1/XRCC3/PRC1/CHTF8/NUF2/TNKS/DYNC1LI1/RB1/ANAPC11/ATRX/ANAPC5/CDC20/DLGAP5/RIOK2/BUB3/VPS4B/CDC6/PSMG2/INCENP/NSL1/CHMP1A/CDC16/LCMT1/NCAPD3/ATM/CENPE/DSCC1 |
| GOCC_CHROMOSOME_CENTROMERIC_REGION | GOCC_CHROMOSOME_CENTROMERIC_REGION | 162 | 0.449350182 | 2.024009292 | 5.18E-08 | 6.86E-06 | 5.28E-06 | 4770 | tags=57%, list=31%, signal=40% | TOP2A/NDC80/DSN1/ITGB3BP/KIF22/MAD2L1/ZWINT/CENPQ/SS18L1/SKA2/STAG3/NUDCD2/BUB1/SMC6/ESCO2/CENPK/SMC4/ZWILCH/AURKB/NCAPD2/SEC13/MIS12/CDT1/DAXX/UHRF2/OIP5/NCAPG/APC/XPO1/DYNLT3/STAG1/NUP43/CBX1/NEK2/HELLS/CFDP1/DCTN5/TP53BP1/CBX5/NUP37/CLASP2/PSEN2/UVRAG/SPC24/CTCF/KNTC1/PSEN1/PPP1R12A/NUF2/CENPH/HJURP/PHF6/PPP2R5A/IKZF1/DYNC1LI1/NUP85/CENPM/ATRX/DYNLL1/PPP1CC/BUB3/CENPL/SUV39H1/STAG2/CENPN/KAT2B/INCENP/NSL1/NCAPD3/PAFAH1B1/CENPE/DSCC1/PPP2R5C/DCTN4/ZW10/DCTN6/KIF2C/SKA1/CENPI/SPC25/CDCA5/SUGT1/DNMT3A/TTK/DCTN3/PDS5B/CBX3/SUV39H2/CLIP1/MAD1L1/PDS5A/CSNK1A1 |
| GOBP_MITOCHONDRIAL_GENE_EXPRESSION | GOBP_MITOCHONDRIAL_GENE_EXPRESSION | 138 | 0.477155168 | 2.105251467 | 5.59E-08 | 7.25E-06 | 5.59E-06 | 5655 | tags=59%, list=36%, signal=38% | RMND1/TFB1M/GFM2/WARS2/LARS2/MRPS10/MRPL35/MTRF1/MRPS14/NSUN3/MRPS9/MRPL1/MRPS28/RPUSD3/MRPL45/MRPL19/MRPL20/MRPL33/MRPS27/RARS2/YARS2/MRPL40/MTIF3/MRPL28/MRPL30/SLC25A33/CHCHD1/MRPS7/MRPL47/HSD17B10/MRPL18/MRPL13/MRPS35/MRPS17/MRPS23/MRPL48/MRPS11/MRPL52/MRPS34/TSFM/MRPL14/MRPL17/MRPS18A/MRPL49/MRPL41/TRMT5/MRPL24/DAP3/MRPL3/MTO1/MRPL16/MRPL22/DARS2/FASTKD2/TFB2M/MRPS22/MRPL15/LRPPRC/OXA1L/MRPS18B/ELAC2/TACO1/MRPL10/RPUSD4/MRPS36/MRRF/MRPL55/CDK5RAP1/MRPL42/C1QBP/QRSL1/MRPL46/AARS2/MRPS5/MRPL32/MRPL43/NDUFA7/MRPL51/METTL4/MRPS21/MRPS26 |
| GOBP_MUSCLE_SYSTEM_PROCESS | GOBP_MUSCLE_SYSTEM_PROCESS | 401 | -0.358744733 | -1.786031743 | 6.53E-08 | 8.30E-06 | 6.39E-06 | 3434 | tags=32%, list=22%, signal=26% | CHGA/GAA/KCNN2/SCN10A/LMCD1/MYOZ1/LMOD3/DSP/TIAM1/SSTR2/ATP1B1/SGCA/PPP1R13L/LMNA/ANKRD2/TACR1/NKX2-5/MYL4/TPM2/NPPA/LMOD1/ACTC1/ENO1/ATP1A1/SMTN/OXTR/CHRNB2/MYOC/CAMTA2/CHRNA3/ATP8A2/CACNA2D1/DMPK/HAMP/GHRL/MSTN/KCNJ12/JUP/SCN5A/P2RY1/ADA/RYR2/CAV1/SCN2B/AKAP13/CASQ2/HMOX1/PRKAG3/CDK9/CACNA1G/RGS4/SLC9A1/SCN3B/PDE9A/MYH13/VCL/TBXA2R/TRPM4/LTB4R/CSRP3/MAP2K3/PDLIM5/TNFRSF1B/GLRA1/CXCR4/GJC1/PDE4B/SSPN/HSPB6/SLC8A3/FOXO3/SCN1A/ACTA2/SULF1/KCNB2/SORBS1/LEP/TMOD4/MYOM3/KCNA1/IGF1/ATP1A2/TPCN2/SPHK1/GHSR/GATA6/PI16/CRYAB/PDE4D/KCNA5/ANK2/SMAD3/ATP2A1/ATP2B4/NOS1/TMOD1/GJA1/KCNE4/NOS3/GATA4/ADRB2/MYL9/HOMER1/NOS1AP/NR4A3/SCN7A/ARG2/HCN4/P2RX1/SRF/TNFRSF1A/EDN3/CALCA/STC1/CNN1/PPARGC1A/IL1B/MYH11/FOXO1/EDN1/RGS2/SCNN1B/KLF4/MYBPH/MYOM1/PROK2/ACTG2/ZC3H12A |
| GOBP_POSITIVE_REGULATION_OF_ACUTE_INFLAMMATORY_RESPONSE | GOBP_POSITIVE_REGULATION_OF_ACUTE_INFLAMMATORY_RESPONSE | 26 | -0.754046284 | -2.357400167 | 7.30E-08 | 9.10E-06 | 7.01E-06 | 644 | tags=46%, list=4%, signal=44% | FFAR3/CCR7/FFAR2/OSMR/TAC1/CREB3L3/OSM/IL1B/C2CD4A/C2CD4B/PTGS2/IL6 |
| GOBP_SKIN_DEVELOPMENT | GOBP_SKIN_DEVELOPMENT | 368 | -0.36831711 | -1.820041731 | 8.54E-08 | 1.04E-05 | 8.04E-06 | 4285 | tags=42%, list=28%, signal=31% | KRT32/KRT76/SCEL/KRT81/KRT3/KRT71/SPINK6/SOX18/CDH3/KRTAP5-11/PKP1/ZBED2/DLL1/KRT73/SLITRK5/IGFBP5/KRTAP4-11/LCE1B/KRTAP12-2/ALOX15B/POU3F1/KRTAP13-2/KRTAP19-5/INTU/KRTAP10-9/GRHL3/ITGA3/GNAS/NSUN2/LAMA5/KRT23/ITGA2/KRTAP26-1/KRT34/CBFB/KRT19/ZFP36L1/LCE3E/KRTAP10-7/DSP/LCE1D/KRTAP10-8/PI3/WNT10B/KRT9/EGFR/KRT84/KRT12/KRTAP4-2/KRT74/KRTAP12-4/KRT77/ACVR1B/YAP1/KRT6B/SPINK9/ATP8A2/KRTAP10-4/APCDD1/KRT85/EREG/PALLD/KRT25/KRTAP4-5/ASCL4/FURIN/KRT27/RELA/KRTAP5-6/JUP/KRTAP20-1/FLG/KRTAP5-7/KRTAP5-1/TCF15/KRTAP13-1/MET/FRAS1/VDR/AQP3/KRTAP9-3/KRTAP5-10/KRTAP10-11/KRT20/TGFB2/KRTAP5-4/KRTAP10-10/FZD6/KRTAP9-4/FGF10/KRTAP27-1/KRT38/KLK14/ITGB4/KRT35/SPRR4/KRT15/KRTAP10-3/KRTAP12-1/KRTAP10-1/KRT28/KRT13/REG3G/KRTAP4-1/KRT24/SOX21/GRHL1/SPRR2E/GJB3/KRT7/KRTAP17-1/SERPINB13/CASP14/KRT16/DNASE1L2/KRTAP5-9/KRTAP11-1/ACER1/TFAP2B/GRHL2/FOXQ1/KRTAP5-2/JAG1/LCE5A/KRT6A/FA2H/KRTAP1-3/KRTAP4-4/DKK4/TGM5/KRT33B/KRTAP8-1/SPINK5/LCE1C/KRT4/GATA6/SPRR3/CYP27B1/PTCH2/KRTAP5-3/KRT80/ALX4/KRT72/IL20/KRTAP3-2/SRF/KLK13/LIPN/FST/LRP4/ALOX12B/SFN/FOXC1/FOSL2/ZFP36/EPHA2 |
| GOBP_REGULATION_OF_CHOLESTEROL_BIOSYNTHETIC_PROCESS | GOBP_REGULATION_OF_CHOLESTEROL_BIOSYNTHETIC_PROCESS | 41 | 0.691622541 | 2.386429501 | 9.34E-08 | 1.12E-05 | 8.64E-06 | 954 | tags=34%, list=6%, signal=32% | CYP7A1/GPAM/SQLE/HMGCS1/MVK/FDFT1/ELOVL6/LSS/IDI1/PMVK/TM7SF2/MVD/SEC14L2/NFYB |
| GOBP_PEROXISOME_ORGANIZATION | GOBP_PEROXISOME_ORGANIZATION | 75 | 0.572310484 | 2.266952174 | 9.67E-08 | 1.13E-05 | 8.74E-06 | 3692 | tags=55%, list=24%, signal=42% | DDO/DAO/AMACR/IDH1/PEX3/TMEM135/FIS1/IDE/ACOT8/ACAA1/HAO1/NUDT7/PHYH/SCP2/HACL1/ZFAND6/PEX12/ABCD2/PEX11B/CROT/EHHADH/PEX14/ABCD3/GNPAT/TYSND1/MFF/PEX5/PAOX/PEX1/PEX7/PIPOX/DNM1L/PECR/HMGCL/SEC16B/PEX11A/AGPS/PEX16/ACOX2/CAT/ECH1 |
| GOBP_MULTICELLULAR_ORGANISMAL_SIGNALING | GOBP_MULTICELLULAR_ORGANISMAL_SIGNALING | 195 | -0.428339996 | -1.967048283 | 9.80E-08 | 1.13E-05 | 8.74E-06 | 3423 | tags=39%, list=22%, signal=31% | KCNN2/KCNIP4/SCN10A/DSP/JAM3/ATP1B1/STIM1/FXYD6/SCN2A/CLDN19/NKX2-5/NPPA/ATP1A1/MTNR1B/ISL1/NPPC/CACNA2D1/CNTNAP1/DMPK/GHRL/KCNJ12/CACNA1I/JUP/CACNG5/SCN5A/KCNMB4/CARTPT/CACNG1/KCNJ14/RYR2/CAV1/SCN2B/CASQ2/ATP1B3/S1PR1/CACNA1G/SPTBN4/SLC9A1/SCN3B/KCNH6/DRD5/TRPM4/AVPR1A/CACNG6/KCNIP1/GLRA1/GJC1/SLC8A3/SCN1A/ATP1B2/NTRK2/KCNA1/SCN9A/ATP1A2/GPR88/CHRM5/GHSR/PDE4D/KCNA5/ANK2/TRPC1/ATP2A1/CACNG3/ATP2B4/ITPR1/NOS1/GJA1/KCNE4/CACNG7/MAG/SCN7A/HCN4/CACNG2/P2RX1/TNR/SLC8A2/KCNK1 |
| GOBP_MITOTIC_NUCLEAR_DIVISION | GOBP_MITOTIC_NUCLEAR_DIVISION | 252 | 0.394451853 | 1.881914747 | 1.04E-07 | 1.18E-05 | 9.06E-06 | 4165 | tags=44%, list=27%, signal=33% | NCAPG2/NUSAP1/NDC80/REEP4/CDK5RAP2/UBXN2B/CHMP4A/ANAPC7/DSN1/PTTG1/NPM2/KLHDC8B/TUBG2/KIF22/MAD2L1/SPAST/CHEK1/ZWINT/AURKA/SMC2/TUBG1/RACGAP1/RCC1/BUB1/TOM1L1/VRK1/ANLN/CENPK/GEN1/CDC23/SMC4/GOLGA2/IK/CHMP5/AURKB/NCAPD2/MIS12/CDT1/REEP3/PPP1R9B/CHMP6/NCAPG/CCNB2/APC/KIFC1/STAG1/CHMP2A/NSMCE2/NEK2/TACC3/KATNB1/KLHL22/TRIP13/ESPL1/CLASP2/NEK9/CD28/MAD2L2/PHB2/KNTC1/XRCC3/PRC1/CHTF8/NUF2/PRKCB/KIF3B/NME6/KIF11/TNKS/CEP192/DYNC1LI1/PDGFRB/RB1/ANAPC11/ATRX/ANAPC5/CHEK2/CAV2/CDC20/DLGAP5/RIOK2/BUB3/VPS4B/STAG2/CDC6/PSMG2/BTC/INCENP/NSL1/FBXW5/CHMP1A/CDC16/LCMT1/NCAPD3/ATM/CENPE/DSCC1/DRG1/BECN1/CUL7/ANAPC4/ZW10/CEP97/BCCIP/BMP4/NSFL1C/CDC27/CHMP2B/KIF2A/KIF2C/KIF20B/SH2B1 |
| GOBP_EXTERNAL_ENCAPSULATING_STRUCTURE_ORGANIZATION | GOBP_EXTERNAL_ENCAPSULATING_STRUCTURE_ORGANIZATION | 373 | -0.362272687 | -1.792166564 | 1.05E-07 | 1.18E-05 | 9.06E-06 | 2843 | tags=27%, list=18%, signal=22% | KLK2/HAS3/COL19A1/ACAN/COL16A1/SCUBE3/FBN2/JAM2/NFKB2/CTRB2/ABL1/FURIN/ADAMTS14/PAPLN/OPTC/ITGAX/TCF15/A2M/CAV1/MMP1/CST3/TGFB2/OTOL1/MMP28/TLL1/NID2/PRSS1/ITGB4/ADAMTS15/MATN4/COL6A1/MMP26/COL8A1/WNT3A/ADAM19/SERPINB5/NOX1/TNFRSF1B/PDGFB/KLK7/LAMA1/ADAMTS20/ADAMTS4/COL15A1/PDPN/SMOC1/SH3PXD2A/NID1/SULF1/APLP1/CSGALNACT1/COL4A4/BMP2/TGFB1/MADCAM1/MMP2/LOX/MMP3/COL24A1/COL4A3/SPINK5/FBLN1/ELN/GPM6B/MMP25/ICAM4/PHLDB1/ITGA10/SMAD3/ADAMTS16/LAMC2/KLK4/EGFLAM/WT1/MMP19/VCAN/VWF/NPHS1/ICAM1/FOXC2/ITGB8/B4GALT1/TNFRSF1A/OLFML2A/TNXB/HAS2/HAS1/MMP10/TNR/MYH11/CRISPLD2/ELF3/THBS1/PTX3/FOXC1/BCL3/SERPINE1/ADAMTS1/IL6 |
| GOBP_SENSORY_ORGAN_DEVELOPMENT | GOBP_SENSORY_ORGAN_DEVELOPMENT | 495 | -0.334787543 | -1.701684761 | 1.37E-07 | 1.51E-05 | 1.16E-05 | 3982 | tags=37%, list=26%, signal=29% | DLX5/WNT9A/PTK7/SLC6A3/KERA/SLC17A8/ESRRB/PROM1/HEY2/ATP2B1/ADAMTS18/DRD2/NR2E1/IFT88/FOXL2/SCO2/PAX6/INTU/CLRN1/GRHL3/MAB21L1/SH3PXD2B/WNT1/USH1C/NES/PITX2/LHX3/NAGLU/MEIS2/RHO/FGF20/GBX2/PITX3/CRYGA/SLC4A5/COL4A1/PPP1R13L/VSX1/PCDH15/FKBP8/CABP4/GJB6/LHX1/WNT10B/GJA8/EGFR/JMJD6/KRT12/SKI/ATF4/CHRNA9/FOXE3/MTNR1B/FOXI1/FGF8/SOX2/OTX1/NOX3/ATP8A2/RPE65/SIX3/FBN2/ATF6/SPRED1/DIO3/PDE6A/SOX8/VAX1/OPN4/NOG/TFAP2A/SMARCD3/FZD5/TCF15/RDH13/SDK1/NEUROD4/TMEM231/TH/TGFB2/SOX1/CRYBB3/LRP10/WNT7B/OTOL1/RAX/HES1/FZD6/GABRA5/GLI3/RP1L1/FGF10/CRYBA1/USH1G/TTLL5/PBX4/MYO3B/SPRY1/BIRC7/COL8A1/PHACTR4/MYO3A/PDZD7/BMP6/WNT3A/CRYGD/STAT3/ATOH1/SLC9A3R1/SDK2/NR2E3/SLC44A4/PTF1A/CYTL1/GABRB2/TGFBR2/PROX1/LAMA1/CDH23/ATP6V1B1/SLC4A7/SIX4/TGIF2/TFAP2B/GRHL2/ECE1/HMX2/PRRX1/HIPK2/SMOC1/UNC45B/CRYGB/TSKU/NDP/BMP2/JAG1/POU4F2/MAPKAPK2/NTRK2/NTF4/SPRED2/VEGFA/GATA3/HES5/RP1/STRC/LRP5/CRYAB/CYP1A1/BCL2L11/GDF3/CHRDL1/ROM1/SMAD3/PHOX2B/ATP2B4/TMOD1/CHRNA10/ALDH1A3/SPRY2/GNAT1/HOXA13/HPCA/WT1/LHFPL5/SLC25A25/MEGF11/SOX11/FJX1/FOXC2/SRF/OSR1/LRIG1/MSX1/SOX3/ACVR2B/POU4F3/EDN1/SDC4/KLF4/TGFB3/MYOM1/FOXC1/EPHA2 |
| GOBP_FAT_CELL_DIFFERENTIATION | GOBP_FAT_CELL_DIFFERENTIATION | 196 | -0.428259192 | -1.967668551 | 1.42E-07 | 1.53E-05 | 1.18E-05 | 2156 | tags=27%, list=14%, signal=24% | UCP1/RETN/HES1/FGF10/PRDM16/ASXL1/TRIO/WNT3A/TRPM4/TRIB2/LMO3/ZBTB7C/IL11/PLCB1/TFAP2B/EBF2/BMP2/JAG1/TGFB1/ADRB1/LEP/DUSP10/METRNL/GATA3/LRP5/ZFP36L2/GDF3/FFAR2/SMAD3/DIO2/PER2/TCF7L2/C1QL4/ADRB2/NR4A3/CDS1/LRG1/ARID5B/PPARGC1A/INHBB/NR1D1/FOXO1/PIM1/KLF5/RGS2/KLF4/PTGS2/ZFP36/NR4A2/NR4A1/SOCS1/ZC3H12A/IL6 |
| GOBP_MICROTUBULE_ORGANIZING_CENTER_ORGANIZATION | GOBP_MICROTUBULE_ORGANIZING_CENTER_ORGANIZATION | 117 | 0.492891968 | 2.135269488 | 1.45E-07 | 1.54E-05 | 1.19E-05 | 4042 | tags=51%, list=26%, signal=38% | CNTLN/NDC80/CDK5RAP2/UBXN2B/PARD6B/BRCA1/CETN2/CHEK1/AURKA/CETN3/BBS4/TUBE1/PKD2/MDM1/CCNF/SAC3D1/GEN1/GOLGA2/CHMP5/SASS6/SDCCAG8/GADD45A/CEP250/KIF3A/CHMP2A/NEK2/CEP152/CEP120/SSX2IP/CLASP2/UVRAG/XRCC3/NPM1/PPP1R12A/BCAS3/USP33/CEP63/KIF3B/CNTROB/KIF11/CEP192/NIN/PARD6A/PLK4/CENPJ/VPS4B/PDCD6IP/WDR62/KAT2B/FBXW5/CHMP1A/PAFAH1B1/ALMS1/CTNNB1/MCPH1/UXT/XRCC2/NSFL1C/ARL2/CHMP2B |
| GOBP_PRI_MIRNA_TRANSCRIPTION_BY_RNA_POLYMERASE_II | GOBP_PRI_MIRNA_TRANSCRIPTION_BY_RNA_POLYMERASE_II | 52 | -0.63541059 | -2.337279209 | 1.47E-07 | 1.54E-05 | 1.19E-05 | 2086 | tags=35%, list=13%, signal=30% | TGFB2/NFATC4/STAT3/PDGFB/FOXO3/BMP2/TGFB1/GATA3/SMAD3/WT1/SRF/IL10/JUN/KLF5/KLF4/FOSL1/FOS/EGR1 |
| GOCC_ORGANELLE_INNER_MEMBRANE | GOCC_ORGANELLE_INNER_MEMBRANE | 426 | 0.345150703 | 1.741471721 | 1.50E-07 | 1.55E-05 | 1.19E-05 | 4844 | tags=45%, list=31%, signal=32% | TYMS/IFI27/IFI6/SLC25A34/SIRT4/SPHK2/COQ10A/CYP11A1/SLC25A40/IMMP1L/RSAD2/COX15/SLC25A20/TIMM17A/NDUFAF1/CCDC51/LGALS3/TM7SF2/NDUFA5/MRPS10/PPIF/MRPL35/NDUFS4/NDUFA6/MRPS14/LRRK2/DPY19L4/GUF1/MRPS9/NDUFB2/MRPL1/MRPS28/NDUFB1/TMEM177/L2HGDH/ALDH18A1/PHB/YME1L1/TIMM8B/GATM/COX11/TIMM8A/SAMM50/NDUFB4/SLC25A30/NDUFA10/COX18/ARL6IP6/MRPL45/BDH1/MRPL19/TMEM14C/MRPL20/COX7A2L/SLC25A26/MRPL33/TMEM126B/MRPS27/NDUFA9/CYP2U1/PSEN2/NDUFB6/SLC25A42/PHB2/PMPCB/MRPL40/PLA2G4A/MRPL28/PSEN1/MRPL30/CHCHD3/SLC25A38/UQCRB/SLC25A33/CRLS1/COQ3/CHCHD1/MTX3/UQCRQ/IMMP2L/NDUFV1/MRPS7/TIMM13/MRPL47/MRS2/MRPL18/MRPL13/MRPS35/UQCRC2/SLC25A1/TTC19/SPAG4/MRPS17/FECH/COX7A2/MRPS23/SURF1/MRPL48/MRPS11/MRPL52/MRPS34/COX6C/PPOX/AIFM1/SLC25A27/MRPL14/CHCHD6/SDHA/SLC25A10/NNT/APOO/BCS1L/MRPL17/COQ5/FOXRED1/MRPS18A/MRPL49/MRPL41/SLC25A23/NDUFA11/ZMPSTE24/OMA1/TMEM65/NDUFB10/COQ7/HADHB/SLC25A16/FPGS/COX6B1/BOK/MRPL24/AGK/DAP3/HSD3B1/ABCB7/NDUFC1/SFXN5/MRPL3/MRPL16/SLC25A43/UNC50/NDUFAB1/MRPL22/NDUFB3/NDUFA12/EXOG/FASTKD2/SIGMAR1/NEU4/APOOL/ROMO1/RPS3/CHDH/TMEM11/MRPS22/ABCB8/OTC/COX6A1/SLC25A39/SCO1/ACAD9/MRPL15/UQCRC1/SDHD/LRPPRC/NDUFB5/NDUFS2/SLC25A21/OXA1L/PARL/TMEM14B/TIMM23/GRPEL2/UCP2/ADCK1/MRPS18B/SLC25A22/CBX3/PLSCR3/DPY19L3/SDHC/NDUFA1/ALAS2/SLC25A24/MRPL10/LDHD/HSPD1/NDUFS5/COX4I1/MRPS36/NDUFS8/MATR3/FDXR |
| GOBP_ALCOHOL_METABOLIC_PROCESS | GOBP_ALCOHOL_METABOLIC_PROCESS | 337 | 0.365948556 | 1.793984348 | 1.73E-07 | 1.75E-05 | 1.35E-05 | 3187 | tags=31%, list=20%, signal=25% | CYP7A1/AKR1B10/GPAM/SQLE/SPTLC3/ADH5/PRKAA2/CEBPA/HMGCS1/SPHK2/BMP5/DHDDS/CYP11A1/MVK/AKR1A1/GPD1/MOGAT3/FDFT1/ELOVL6/DHRS9/CYP39A1/SULT1E1/MOGAT1/IP6K3/MOGAT2/LSS/IDI1/PCSK9/PLCD1/ACSS2/IDH1/PMVK/QDPR/TM7SF2/MVD/SEC14L2/LRAT/CFTR/DHFR/IP6K2/MINPP1/NAPEPLD/NFYB/SULT2A1/ACADL/NSDHL/GDE1/RDH11/PLCG1/DGAT1/ANGPTL3/HAO1/PLCB3/CLCN2/SLC5A3/SPR/AKR1B1/RDH16/EBP/PCBD2/ARV1/SPTLC2/APOA5/CYP51A1/SULT1B1/CYP2R1/BPNT1/PNPLA4/ALDH1B1/HMGCR/PLA2G4A/AKR1D1/CYP3A7/INPP5D/INPP5A/VLDLR/COQ3/GDPD1/ADH6/RDH5/NR1H4/CD244/FASN/SCD/ITPKA/CLN6/INSIG2/FDX1/DHCR7/PLD4/NFYA/SREBF2/SPTLC1/ACAT2/PECR/PTEN/PARK7/ASAH1/CBR4/MOXD1/APOL2/DGAT2/ALDH3A2/SYNJ1 |
| GOBP_REGULATION_OF_HEART_CONTRACTION | GOBP_REGULATION_OF_HEART_CONTRACTION | 226 | -0.4156543 | -1.949141248 | 1.79E-07 | 1.79E-05 | 1.38E-05 | 3434 | tags=37%, list=22%, signal=29% | CHGA/GAA/KCNN2/KCNIP4/SCN10A/DSP/ATP1B1/STIM1/FXYD6/NKX2-5/MYL4/NPPA/ATP1A1/ISL1/NPPC/CACNA2D1/BVES/DMPK/KCNJ12/JUP/CACNG5/SCN5A/CACNG1/KCNJ14/ADA/RYR2/GCH1/CAV1/SCN2B/CASQ2/ATP1B3/ADRA1D/TH/TGFB2/CACNA1G/RGS4/SPTBN4/SLC9A1/SCN3B/KCNH6/TRPM4/AVPR1A/CSRP3/CACNG6/KCNG2/KCNIP1/MC3R/GJC1/PDE4B/HSPB7/SLC8A3/SEMA3A/ATP1B2/ADRB1/ATP1A2/PDE4D/KCNA5/ANK2/TRPC1/ATP2A1/CACNG3/ATP2B4/ITPR1/NOS1/GJA1/KCNE4/ADM/GATA4/TAC1/CACNG7/NOS1AP/EPAS1/HCN4/CACNG2/EDN3/CALCA/STC1/SLC8A2/EDN1/RGS2/HBEGF/KCNK1/ZC3H12A |
| GOBP_RESPONSE_TO_MOLECULE_OF_BACTERIAL_ORIGIN | GOBP_RESPONSE_TO_MOLECULE_OF_BACTERIAL_ORIGIN | 304 | -0.374389976 | -1.826353572 | 1.98E-07 | 1.95E-05 | 1.50E-05 | 1751 | tags=25%, list=11%, signal=22% | AKAP8/NFKBIB/IL23R/IRAK1/FGF10/IRF8/BMP6/TBXA2R/IL24/TICAM1/CITED1/CXCL5/CX3CL1/TNFRSF1B/PDE4B/CEBPE/CCR7/CYP1A2/NOD2/TNIP2/IL1A/LILRB2/TGFB1/MAPKAPK2/DUSP10/FOXP1/CXCL6/TIMP4/LBP/IRAK2/S100A9/GHSR/TNFAIP3/IRAK3/CYP1A1/PENK/S100A8/TRIB1/CXCL13/NOS1/ALPL/EPO/CSF2RB/CYP27B1/GJA1/CSF3/CD274/SIRPA/NOS3/ADM/TAC1/C5AR1/CCL3/ICAM1/TNIP3/AKAP12/SCGB1A1/SLC11A1/IL10/PELI1/JUN/SBNO2/CXCL2/PPARGC1A/IL1B/CXCL1/THBD/NR1D1/EDN1/CCL2/ZFP36/SERPINE1/ZC3H12A/FOS/IL6 |
| GOBP_ALCOHOL_BIOSYNTHETIC_PROCESS | GOBP_ALCOHOL_BIOSYNTHETIC_PROCESS | 139 | 0.461926456 | 2.044799595 | 2.38E-07 | 2.31E-05 | 1.78E-05 | 2920 | tags=34%, list=19%, signal=28% | CYP7A1/GPAM/SQLE/SPTLC3/PRKAA2/HMGCS1/SPHK2/BMP5/DHDDS/MVK/FDFT1/ELOVL6/IP6K3/LSS/IDI1/PMVK/QDPR/TM7SF2/MVD/SEC14L2/CFTR/DHFR/IP6K2/NFYB/NSDHL/CLCN2/SPR/AKR1B1/EBP/PCBD2/ARV1/SPTLC2/APOA5/CYP51A1/CYP2R1/HMGCR/CD244/FASN/SCD/ITPKA/INSIG2/DHCR7/NFYA/SREBF2/SPTLC1/ACAT2/PARK7 |
| GOBP_REGULATION_OF_INFLAMMATORY_RESPONSE | GOBP_REGULATION_OF_INFLAMMATORY_RESPONSE | 298 | -0.374817429 | -1.823069012 | 2.48E-07 | 2.37E-05 | 1.82E-05 | 1690 | tags=22%, list=11%, signal=20% | NLRP12/FFAR3/AKNA/FEM1A/FPR2/PLA2G2D/CX3CL1/TTBK1/TNFRSF1B/CCR7/SPATA2/HYAL2/NOD2/MAS1/BCL6B/BIRC3/TGM2/DUSP10/METRNL/FOXP1/GATA3/IGF1/MMP3/LBP/SPHK1/S100A9/GHSR/TNFAIP3/S100A8/FFAR2/SMAD3/FNDC4/PLA2G2A/SIRPA/OSMR/SAA1/TAC1/GPR4/PLA2G3/IL20/CCL3/LRFN5/TYRO3/ADCYAP1/SCGB1A1/LDLR/TNFRSF1A/IL10/CREB3L3/OSM/TNFAIP6/SBNO2/IL1B/IL1RL1/NR1D1/C2CD4A/S100A12/NFKBIZ/KLF4/BCL6/C2CD4B/SOCS3/PTGS2/SERPINE1/IL6 |
| GOCC_LARGE_RIBOSOMAL_SUBUNIT | GOCC_LARGE_RIBOSOMAL_SUBUNIT | 108 | 0.502767777 | 2.147482099 | 2.63E-07 | 2.47E-05 | 1.90E-05 | 5602 | tags=62%, list=36%, signal=40% | RPL39L/MRPL35/C12orf65/NSUN3/RPL7A/MRPL1/RPL26/MRPL45/MRPL19/MRPL20/RPL23A/RPL37/RPL7/MRPL33/RPL35A/MRPL40/RPL13A/MRPL28/MRPL30/RPL8/RPL15/MRPL47/RPLP0/MRPL18/RPL34/RPL17/MRPL13/RPL41/MRPL48/MRPL52/MRPL14/NSUN4/RPL29/MRPL17/MRPS18A/MRPL49/MRPL41/RPL9/MRPL24/RPL11/RPL36AL/MRPL3/MRPL16/RPL3/NDUFAB1/MRPL22/RPL21/RPL3L/RPL31/RPL27A/MRPL15/RPL23/MRPL10/RPL22/RPL37A/RPL19/MRPL55/RPL24/MRPL42/MRPL46/MRPL32/RPL6/MRPL43/MRPL51/RPL35/RPL10/RPL26L1 |
| GOCC_CATION_CHANNEL_COMPLEX | GOCC_CATION_CHANNEL_COMPLEX | 202 | -0.420209971 | -1.939927502 | 3.01E-07 | 2.78E-05 | 2.14E-05 | 3970 | tags=44%, list=26%, signal=33% | KCNA4/GRIN2C/DLG4/KCNA2/CACNA1B/GRIN1/LRRC52/KCNG1/CACNB1/LRRC55/KCNG3/KCNIP4/SCN10A/SCNN1G/CACNA1A/SCN2A/HCN2/CACNA1E/KCNC1/FKBP1A/GRIN2D/ABCC8/GRIA2/KCNK4/SHANK1/CACNA2D1/DPP10/HTR3A/CACNA1I/KCNJ1/GRIK4/CACNG5/SCN5A/KCNMB4/CACNG1/STX1A/TRPV6/KCNJ14/RYR2/KCNMB1/PKD1L3/SCN2B/CASQ2/CNIH3/CACNA1G/GRIK3/KCNC2/SCN3B/HTR3B/TRPM4/KCNA10/CACNG6/KCNG2/KCNS1/KCNIP1/GRIK5/PDE4B/PKD1L1/KCNS2/KCNJ6/SCN1A/KCNB2/SCNN1A/HSPA2/VWC2/KCNA1/SCN9A/KCNS3/NLGN1/PDE4D/DPP6/KCNG4/KCNA5/TRPC1/KCNC3/CNGB1/ATP2A1/CACNG3/NOS1/ORAI1/KCNE4/CACNG7/NOS1AP/SCN7A/HCN4/CACNG2/CPT1C/SCNN1B/KCNK1 |
| GOMF_DAMAGED_DNA_BINDING | GOMF_DAMAGED_DNA_BINDING | 62 | 0.594381474 | 2.271378033 | 3.23E-07 | 2.95E-05 | 2.28E-05 | 3368 | tags=47%, list=22%, signal=37% | MSH2/BRCA1/XPA/PCNA/NEIL2/FEN1/SMC6/POLD1/POLB/TP63/OGG1/POLH/POLK/DCLRE1A/FANCG/TP53BP1/POLI/DDB2/RPA3/RAD18/DCLRE1C/APEX1/NEIL1/DCLRE1B/HMGB2/POT1/XRCC5/ERCC4/XRCC1 |
| GOBP_ANTIGEN_PROCESSING_AND_PRESENTATION_OF_PEPTIDE_ANTIGEN_VIA_MHC_CLASS_I | GOBP_ANTIGEN_PROCESSING_AND_PRESENTATION_OF_PEPTIDE_ANTIGEN_VIA_MHC_CLASS_I | 95 | 0.515852111 | 2.163017485 | 3.59E-07 | 3.23E-05 | 2.49E-05 | 4180 | tags=58%, list=27%, signal=43% | PSMD10/ERAP1/PSMB9/PSMA2/MR1/PSMB7/IDE/PSME2/CD36/PSMD14/SEC13/PSMA4/PSMD4/VAMP8/VAMP3/SEC24A/HFE/SEC24D/IKBKB/SEC23A/PSMD7/PSMD1/PDIA3/HLA-F/PSMA3/TAP2/TAPBPL/PSMD13/CLEC4A/PSMD11/SEC31A/TAPBP/SNAP23/PSMA1/PSMB10/PSMC6/PSMB5/CALR/HLA-A/SAR1B/PSMC4/B2M/PSMC3/PSME1/PSMB1/PSMD2/ITGAV/MFSD6/SEC24C/NCF2/PSMA5/SEC24B/HLA-B/IFI30/PSMC5 |
| GOBP_CELL_CHEMOTAXIS | GOBP_CELL_CHEMOTAXIS | 264 | -0.383256105 | -1.824764592 | 3.82E-07 | 3.39E-05 | 2.61E-05 | 2138 | tags=26%, list=14%, signal=23% | S1PR1/TGFB2/SLC12A2/AGTR1/MMP28/CCL11/CCL8/RAC1/LYST/TRPM4/CCL25/CSF1/CXCL5/PGF/FPR2/CX3CL1/CXCR4/PRKCQ/PDE4B/DUSP1/PDGFB/AKIRIN1/CCL20/CCR7/AZU1/EPHB1/RIN3/BCAR1/NOD2/TPBG/CCL3L3/MTUS1/LOX/VEGFA/CXCL6/CCL21/LBP/S100A9/PIP5K1C/S100A8/FFAR2/C10orf99/CCL26/CXCL13/CSF3R/VEGFC/SAA1/C5AR1/CCL3/CCL7/FGFR1/EGR3/CH25H/IL10/EDN3/CALCA/CXCL2/LPAR1/CXCL1/EDN1/HBEGF/S100A12/THBS1/CCL2/SERPINE1/NR4A1/EPHA2/IL6 |
| GOBP_COTRANSLATIONAL_PROTEIN_TARGETING_TO_MEMBRANE | GOBP_COTRANSLATIONAL_PROTEIN_TARGETING_TO_MEMBRANE | 97 | 0.519694216 | 2.174013399 | 4.04E-07 | 3.54E-05 | 2.73E-05 | 5669 | tags=67%, list=36%, signal=43% | RPS4Y1/RPS21/SSR3/RPL7A/RPS26/SEC61A2/RPSA/RPS7/SRP14/RPL26/RPL23A/RPL37/RPL7/RPL35A/SSR1/RPL13A/RPS23/RPS29/RPL8/RPL15/RPLP0/RPL34/RPL17/RPS3A/RPL41/ZFAND2B/RPS2/SRP9/SRP54/RPL29/RPL9/RPL11/SSR2/RPS15A/RPL3/TRAM1/RPL21/ARL6IP1/RPS27A/RPS3/RPL31/SEC63/RPS9/RPL27A/RPS24/SRP72/RPS12/RPS8/SRP68/RPL23/SEC62/RPL22/TRAM1L1/SIL1/RPL37A/RPL19/RPS17/RPL24/RPS15/RPS10/RPL6/RPL35/RPL10/SEC61A1/SEC61B |
| GOBP_TRANSCRIPTION_COUPLED_NUCLEOTIDE_EXCISION_REPAIR | GOBP_TRANSCRIPTION_COUPLED_NUCLEOTIDE_EXCISION_REPAIR | 71 | 0.570941719 | 2.227749862 | 4.10E-07 | 3.55E-05 | 2.73E-05 | 4658 | tags=61%, list=30%, signal=43% | XPA/PCNA/COPS4/RFC1/POLR2K/POLD1/COPS6/GTF2H5/POLR2E/RFC3/POLR2G/POLK/POLR2L/PPIE/COPS5/HMGN1/GTF2H3/ERCC8/COPS2/ERCC6/POLR2B/ISY1/RBX1/RFC5/RPA3/MNAT1/POLD2/RFC4/POLR2J/ZNF830/ERCC4/XRCC1/POLD3/RPS27A/ERCC3/GPS1/RPA1/USP7/TCEA1/POLR2F/AQR/GTF2H4/PRPF19 |
| GOBP_POSITIVE_REGULATION_OF_MAPK_CASCADE | GOBP_POSITIVE_REGULATION_OF_MAPK_CASCADE | 471 | -0.330679153 | -1.67543778 | 4.37E-07 | 3.70E-05 | 2.85E-05 | 2086 | tags=21%, list=13%, signal=19% | TGFB2/WNT7B/NPTN/CCL11/DKK1/IRAK1/FGF10/PTPN1/IGFBP4/AVPI1/CCL8/PDGFC/BIRC7/CCL25/MAP2K3/FPR2/CX3CL1/FZD7/NOX1/CXCR4/FGD2/PDGFB/CCL20/CCR7/IL11/FLT3/PLCB1/DUSP9/SEMA3A/NOD2/HIPK2/NTRK3/GRM4/TPBG/BMP2/TGFB1/LEP/AXIN1/CCL3L3/MAPKAPK2/NTRK2/VEGFA/IGF1/RAPGEF1/ADRB3/CCL21/SPHK1/IRAK2/DUSP5/NDST1/LTBR/GPR37L1/PROK1/CCL26/THPO/EPO/SPRY2/PLA2G2A/FGF9/ARHGEF5/SAA1/GATA4/ADRB2/CSK/PELI2/DNAJC27/C5AR1/CCL3/CCL7/ICAM1/S1PR2/FGFR1/IGFBP6/AKAP12/ADCYAP1/SBK2/FPR1/KL/DUSP6/TNFAIP8L3/OSM/EDN3/ERN1/LPAR1/IL1B/ALOX12B/EDN1/S100A12/LIF/TNIK/THBS1/GADD45B/TGFB3/PROK2/CCL2/GADD45G/ZC3H12A/IL6 |
| GOBP_ESTABLISHMENT_OF_PROTEIN_LOCALIZATION_TO_MEMBRANE | GOBP_ESTABLISHMENT_OF_PROTEIN_LOCALIZATION_TO_MEMBRANE | 300 | 0.368975683 | 1.788360156 | 4.40E-07 | 3.70E-05 | 2.85E-05 | 4730 | tags=45%, list=30%, signal=32% | RPS4Y1/RTP4/RTP3/PDZK1/RAB26/CD24/CHMP4A/ZDHHC2/CDK5/RPS21/SGTB/GOLPH3L/VPS37D/PEX3/RAB8A/YWHAZ/BBS2/SSR3/GOPC/TP63/FIS1/NMT1/EXOC4/ITGB1BP1/RPL7A/RPS26/VAMP5/OPTN/SEC61G/SEC61A2/TIMM8B/NSF/YIF1B/RPSA/KCNB1/VAMP3/RPS7/CALM3/SRP14/SAMM50/RPL26/COX18/LYPLA1/GOLGA7/RPL23A/RPL37/RPL7/MAPK8/HSPA5/KRT18/RPL35A/SSR1/RPL13A/RPS23/RPS29/RPL8/RPL15/TIMM13/CHM/RPLP0/PAK1/HSPA4/ERBB2/RFTN1/RPL34/MFF/RSC1A1/RPL17/PEX5/RPS3A/SDCBP/RPL41/ARFRP1/ZDHHC3/RAB10/ZFAND2B/CASP8/ARL6/RPS2/VPS35/BLZF1/SRP9/RAB3GAP2/SRP54/RPL29/BCS1L/ATG3/GORASP2/CACNB3/RPL9/ZDHHC20/PEX16/RABGEF1/PRKCI/AGK/RPL11/PDCD5/HRAS/SSR2/NACA/RPS15A/RPL3/TRAM1/GOLGA4/RPL21/ARL6IP1/AP3B1/RPS27A/ITGB2/ROMO1/RPS3/RPL31/SEC63/RPS9/GGA3/RPL27A/ZDHHC21/HSP90AA1/BAD/RPS24/SRP72/YWHAE/RPS12/OXA1L/RPS8/ZDHHC7/TOMM22/SRP68/RPL23/PPP3R1/GZMB/CLN3/SEC62/RPL22/TRAM1L1/SIL1 |
| GOBP_ACUTE_INFLAMMATORY_RESPONSE | GOBP_ACUTE_INFLAMMATORY_RESPONSE | 103 | -0.504231795 | -2.069698421 | 4.61E-07 | 3.83E-05 | 2.95E-05 | 1651 | tags=28%, list=11%, signal=25% | PLSCR1/SERPINA1/FFAR3/PLA2G2D/REG3G/ITIH4/TREM1/CCR7/F3/IL1A/GATA3/LBP/CRP/S100A8/FFAR2/EPO/OSMR/SAA1/TAC1/ICAM1/ADCYAP1/B4GALT1/CREB3L3/OSM/IL1B/C2CD4A/C2CD4B/PTGS2/IL6 |
| GOBP_REGULATION_OF_ACUTE_INFLAMMATORY_RESPONSE | GOBP_REGULATION_OF_ACUTE_INFLAMMATORY_RESPONSE | 46 | -0.640462345 | -2.294620573 | 4.70E-07 | 3.84E-05 | 2.96E-05 | 1651 | tags=30%, list=11%, signal=27% | FFAR3/PLA2G2D/CCR7/FFAR2/OSMR/TAC1/ADCYAP1/CREB3L3/OSM/IL1B/C2CD4A/C2CD4B/PTGS2/IL6 |
| GOBP_REGULATION_OF_DEVELOPMENTAL_GROWTH | GOBP_REGULATION_OF_DEVELOPMENTAL_GROWTH | 290 | -0.376069042 | -1.822545233 | 4.74E-07 | 3.84E-05 | 2.96E-05 | 2900 | tags=31%, list=19%, signal=25% | PRL/NDEL1/FGF8/PTCH1/YAP1/ATP8A2/INSR/OSTN/NPPC/RAI1/AGR2/ABL1/MT3/HAMP/SIN3A/GHRL/WWC3/MSTN/SEMA6A/SEMA3C/DIO3/SEMA6C/MAPT/NOG/MAP2/TBX5/ARX/TRIM46/DBN1/RGS4/ZFYVE27/KIAA0319/SLC6A4/SEMA3D/MAP1B/SPTBN4/WNT3A/CSF1/SEMA4F/ISLR2/SEMA3B/CXCR4/POU3F2/TGFBR2/PROX1/GHRH/PLCB1/SIX4/DUSP9/SEMA3A/CPNE6/POU4F2/ADRB1/LEP/DUSP10/VEGFA/IGF1/GHSR/TGFBR3/GATA6/DCC/PI16/SEMA4A/BCL2L11/RND2/GJA1/CDKN1A/RAG2/PLXNA3/WT1/LATS2/ADRB2/CACNG7/MAG/WNT3/FOXC2/SEMA4B/SRF/CDH4/DUSP6/SLC23A2/GDF5/TNR/EDN1/PIM1/RGS2/FOXC1/SOCS2/VIL1 |
| GOCC_VACUOLAR_MEMBRANE | GOCC_VACUOLAR_MEMBRANE | 364 | 0.349076443 | 1.725746405 | 4.80E-07 | 3.85E-05 | 2.96E-05 | 3836 | tags=37%, list=25%, signal=28% | EEF1A2/GNAI1/SPHK2/CLCN5/TLR7/BST2/MREG/PIGR/WIPI1/VPS41/TLR3/MANBA/PCSK9/TMEM9/MGST1/GPLD1/TM6SF1/AP1S1/STX17/ATP6V0D1/SLC46A3/HLA-DRB3/TLR8/AP3M1/SLC17A5/STX8/TMEM63A/VPS11/NAPB/GOPC/CFTR/VTI1B/ABCA5/RRAGB/STX7/NAPG/SEC13/WDR41/HLA-DMA/CKAP4/SLC15A3/TMEM30A/LAMP3/SNAPIN/ATP11C/NSF/TMEM192/HLA-DMB/VAMP8/SYT7/ATP6V1H/DPP4/DNAJC13/ANXA6/CCDC115/CYB561/MYO6/CLTA/SNX14/TRIM23/RAB2A/HLA-F/LAMP2/LAPTM4A/MYO7A/SLC12A4/PSEN2/UVRAG/PLD1/RHEB/ATP6V1D/MFSD8/MAGT1/VPS39/CD63/PSEN1/AP2B1/VLDLR/FNIP1/GABARAPL2/ATP6V1B2/TRAF3IP3/DDOST/TMEM79/TMEM9B/CLTC/SLC48A1/M6PR/TMEM175/PLD3/ATP6V1A/HLA-DOA/RAB12/LMBRD1/HSP90AB1/CTNS/SLC7A14/CLCN4/WDR24/CMTM6/LAMP1/VPS35/MIOS/VASN/CLN5/OCLN/ANXA2/TMEM138/PRKD1/SH3GLB1/GLIPR1/ATP6V0D2/HPSE/CLCN3/ITFG2/FLCN/STARD3NL/PRCP/SPPL2A/SLC30A4/VPS33A/SLC38A9/TMEM106B/PI4K2A/MAP1LC3A/DAGLB/GNB4/HLA-DPA1/OSTM1/NEU1/ATP6V1C1/ENPP1/STK11IP |
| GOBP_SMOOTH_MUSCLE_CELL_PROLIFERATION | GOBP_SMOOTH_MUSCLE_CELL_PROLIFERATION | 121 | -0.483078032 | -2.052203964 | 5.23E-07 | 4.13E-05 | 3.18E-05 | 1531 | tags=26%, list=10%, signal=23% | CX3CL1/NOX1/PDGFB/TGFBR2/MMP2/TGM2/FOXP1/IGF1/HES5/ELN/TNFAIP3/CDH13/TRIB1/GJA1/CDKN1A/FGF9/TCF7L2/NR4A3/IL10/JUN/ERN1/CNN1/PPARGC1A/APOD/EDN1/HBEGF/THBS1/KLF4/TGFB3/ADAMTS1/IL6 |
| GOBP_PROTEIN_TARGETING_TO_MEMBRANE | GOBP_PROTEIN_TARGETING_TO_MEMBRANE | 182 | 0.430709169 | 1.970982498 | 5.33E-07 | 4.17E-05 | 3.21E-05 | 5192 | tags=55%, list=33%, signal=37% | RPS4Y1/RTP4/RTP3/PDZK1/CHMP4A/ZDHHC2/CDK5/RPS21/SGTB/VPS37D/PEX3/SSR3/FIS1/EXOC4/ITGB1BP1/RPL7A/RPS26/SEC61G/SEC61A2/YIF1B/RPSA/KCNB1/RPS7/SRP14/RPL26/GOLGA7/RPL23A/RPL37/RPL7/HSPA5/RPL35A/SSR1/RPL13A/RPS23/RPS29/RPL8/RPL15/CHM/RPLP0/PAK1/ERBB2/RPL34/MFF/RPL17/PEX5/RPS3A/SDCBP/RPL41/ZDHHC3/ZFAND2B/ARL6/RPS2/SRP9/SRP54/RPL29/ATG3/CACNB3/RPL9/ZDHHC20/PEX16/RABGEF1/PRKCI/RPL11/HRAS/SSR2/NACA/RPS15A/RPL3/TRAM1/RPL21/ARL6IP1/RPS27A/ITGB2/RPS3/RPL31/SEC63/RPS9/RPL27A/ZDHHC21/RPS24/SRP72/RPS12/RPS8/ZDHHC7/SRP68/RPL23/SEC62/RPL22/TRAM1L1/SIL1/ZDHHC24/ZDHHC6/RPL37A/VPS37A/CIB1/RPL19/NACA2/RPS17/RPL24/RPS15 |
| GOBP_GOLGI_ORGANIZATION | GOBP_GOLGI_ORGANIZATION | 106 | 0.498442484 | 2.117822735 | 5.84E-07 | 4.50E-05 | 3.47E-05 | 4947 | tags=63%, list=32%, signal=43% | UBXN2B/COG4/TRIP11/STX18/ATP8B1/GOLPH3L/STX17/YWHAZ/VRK1/PDE4DIP/LRRK2/LMAN2L/GOLGA2/ATP8B4/OPTN/TMED10/RAB33B/LMAN2/RAB30/RAB2A/ARL1/CLASP2/BCAS3/LYSMD3/LMAN1/DNAJC28/MAPK3/UBXN2A/HACE1/KIFC3/PI4K2B/TMED2/GBF1/TMED1/SEC16B/BLZF1/PRKD1/DYM/COG1/VAMP4/GORASP2/USP6NL/STX16/TBC1D20/PI4K2A/COG3/SPTBN5/TMED4/STX5/ATL2/CUL7/USO1/ZW10/GOLGB1/NSFL1C/ARFGEF1/STX6/MAP2K1/AKAP9/CDC42/RAB1A/TMED9/GCC2/CSNK1A1/SURF4/PRMT5/FBXW8 |
| GOBP_EPITHELIAL_CELL_PROLIFERATION | GOBP_EPITHELIAL_CELL_PROLIFERATION | 353 | -0.349795039 | -1.72065658 | 6.33E-07 | 4.83E-05 | 3.72E-05 | 3063 | tags=28%, list=20%, signal=23% | WNT10B/WDR13/EGFR/FABP7/FGFBP1/ALOX5/FOXE3/PRL/TNFSF11/SOX2/PTCH1/YAP1/ISL1/PTPRN/CD34/EREG/SIRT1/CEBPB/GHRL/IL12A/SCN5A/NOG/PKHD1/ID1/HOXA5/VIP/VDR/CAV1/CDKN2B/HMOX1/TGFB2/KLK8/HES1/AGTR1/CCL11/NRARP/FGF10/IGFBP4/COL8A1/BMP6/WNT3A/PGF/REG3G/SERPINB5/FZD7/ODAM/NKX3-1/PDGFB/PROX1/SIX4/KLF9/NOD2/F3/SULF1/BMP2/TGFB1/LEP/DUSP10/VEGFA/GATA3/SERPINB1/IGF1/COL4A3/HES5/CEACAM1/GHSR/TGFBR3/KRT4/TNFAIP3/CDH13/SMAD3/CCL26/GJA1/RETNLB/FGF9/TCF7L2/VEGFC/C5AR1/SOX11/FGFR1/NR4A3/OSR1/B4GALT1/EGR3/IL10/LRG1/GDF5/FST/ERN1/HAS2/NR1D1/SFN/THBS1/PROK2/CCL2/ZFP36/NR4A1/EPHA2/MYC/IL6 |
| GOBP_MITOCHONDRIAL_RESPIRATORY_CHAIN_COMPLEX_ASSEMBLY | GOBP_MITOCHONDRIAL_RESPIRATORY_CHAIN_COMPLEX_ASSEMBLY | 68 | 0.552313804 | 2.137521266 | 6.59E-07 | 4.97E-05 | 3.83E-05 | 6343 | tags=85%, list=41%, signal=51% | NDUFAF1/NDUFA5/NDUFS4/NDUFA6/NDUFB2/NDUFB1/SAMM50/NDUFB4/NDUFA10/COX18/TMEM126B/NDUFA9/NDUFB6/SLC25A33/IMMP2L/NDUFV1/COX19/TTC19/SURF1/AIFM1/BCS1L/FOXRED1/NDUFA11/OMA1/NDUFB10/NDUFC1/NDUFAB1/NDUFB3/NDUFA12/SCO1/ACAD9/LYRM7/NDUFB5/NDUFS2/OXA1L/NDUFA1/TACO1/NDUFS5/NDUFS8/NDUFS7/ECSIT/NDUFB11/TMEM126A/NDUFA8/NDUFA2/NDUFV2/NDUFA7/NDUFC2/NDUFB7/NDUFA3/TFAM/COX17/NDUFB8/NDUFS6/FASTKD3/UQCRFS1/NDUFS1/NDUFAF2 |
| GOBP_REGULATION_OF_MAP_KINASE_ACTIVITY | GOBP_REGULATION_OF_MAP_KINASE_ACTIVITY | 288 | -0.365076123 | -1.76940864 | 6.92E-07 | 5.16E-05 | 3.97E-05 | 3302 | tags=31%, list=21%, signal=25% | TIAM1/TGFA/HIPK3/SMPD1/AGER/RIPK2/SASH1/CHRNA7/NPPA/EGFR/MAPK8IP3/NTF3/MST1R/DUSP7/TNFSF11/INSR/CBLC/ADIPOQ/CSPG4/SPRY3/GHRL/SPRED1/DUSP19/MAP3K6/FZD5/CAV1/AKAP13/RGS14/DKK1/RGS4/IRAK1/FGF10/PTPN1/AVPI1/PDGFC/SPRY1/BIRC7/MAP2K3/TRIB2/PPEF2/CXCR4/FGD2/DUSP1/DUSP16/PDGFB/FLT3/DUSP9/HYAL2/DUSP21/NOD2/NTRK3/GRM4/BMP2/TGFB1/MAPKAPK2/SPRED2/DUSP10/VEGFA/IGF1/IRAK2/IRAK3/DUSP5/PROK1/TRIB1/SPRY2/ARHGEF5/SAA1/CSK/C5AR1/DUSP8/S1PR2/FGFR1/IGFBP6/SBK2/FPR1/DUSP6/EDN3/ERN1/LPAR1/IL1B/EDN1/RGS2/S100A12/SPRY4/TNIK/THBS1/GADD45B/TGFB3/PROK2/GADD45G |
| GOMF_CYTOKINE_ACTIVITY | GOMF_CYTOKINE_ACTIVITY | 208 | -0.404198793 | -1.87256893 | 7.10E-07 | 5.23E-05 | 4.03E-05 | 2086 | tags=27%, list=13%, signal=24% | TGFB2/WNT7B/CCL11/CCL8/IFNA14/BMP6/WNT3A/IL24/CCL25/CSF1/IFNA8/CXCL5/CX3CL1/CTF1/CCL20/IL11/BMP15/IL1A/NDP/BMP2/TGFB1/CCL3L3/VEGFA/CXCL6/CCL21/GDF3/C10orf99/CCL26/THPO/EBI3/CXCL13/EPO/CSF3/GREM2/IL20/CCL3/TNFSF14/CCL7/WNT3/SCGB3A1/NAMPT/IL10/IL1RN/OSM/GDF5/CXCL2/IL1B/CXCL1/INHBB/EDN1/LIF/TGFB3/CMTM2/CLCF1/CCL2/IL6 |
| GOCC_INTRINSIC_COMPONENT_OF_POSTSYNAPTIC_DENSITY_MEMBRANE | GOCC_INTRINSIC_COMPONENT_OF_POSTSYNAPTIC_DENSITY_MEMBRANE | 44 | -0.640694161 | -2.269549836 | 8.34E-07 | 6.08E-05 | 4.68E-05 | 3441 | tags=48%, list=22%, signal=37% | LRFN2/SLC16A3/PTPRS/ADAM22/DRD3/PTPRT/CLSTN2/SLITRK1/NPTN/SLC30A1/GRIK5/LRRTM2/CHRM1/GRID1/GSG1L/DCC/CACNG3/CACNG7/LRFN5/CACNG2/SLITRK3 |
| GOBP_AMEBOIDAL_TYPE_CELL_MIGRATION | GOBP_AMEBOIDAL_TYPE_CELL_MIGRATION | 381 | -0.346196981 | -1.719475401 | 8.57E-07 | 6.18E-05 | 4.76E-05 | 2510 | tags=23%, list=16%, signal=20% | ANGPT2/SEMA6A/SEMA3C/JUP/SPRED1/SEMA6C/ACVR1/SOX8/ID1/MET/ANXA3/HMOX1/ZFAND5/TGFB2/STARD13/FGF10/RADIL/ITGB4/PTP4A3/SEMA3D/WASF2/RAC1/PHACTR4/TBXA2R/SEMA4F/MAP2K3/NFE2L2/S100A2/DNAJA4/SEMA3B/EFNB2/RFFL/PDGFB/TGFBR2/PROX1/KRT16/MTA2/HYAL2/SEMA3A/BCAR1/PKN3/TMEM201/TPBG/TGFB1/DUSP10/FOXP1/VEGFA/GATA3/INSL3/CEACAM1/LRP5/CDH13/SEMA4A/PHOX2B/ATP2B4/CXCL13/GJA1/NOS3/VEGFC/TAC1/ANGPT4/FGFR1/AKAP12/RHOB/FOXC2/SEMA4B/SRF/CENPV/EGR3/EDN3/HAS2/HAS1/STC1/ARID5B/SOX17/TACSTD2/EDN1/HBEGF/SDC4/THBS1/KLF4/S100P/PTGS2/NR4A1/EPHA2/ZC3H12A/VIL1 |
| GOBP_HEART_PROCESS | GOBP_HEART_PROCESS | 268 | -0.375464128 | -1.795090677 | 9.16E-07 | 6.53E-05 | 5.03E-05 | 3434 | tags=34%, list=22%, signal=27% | CHGA/GAA/KCNN2/KCNIP4/SCN10A/ACE/DSP/ATP1B1/STIM1/FXYD6/PPP1R13L/NKX2-5/MYL4/NPPA/ACTC1/ATP1A1/YAP1/ISL1/NPPC/WWTR1/CACNA2D1/BVES/DMPK/KCNJ12/JUP/CACNG5/SCN5A/CACNG1/KCNJ14/ADA/RYR2/GCH1/CAV1/SCN2B/AKAP13/CASQ2/ATP1B3/ADRA1D/TH/TGFB2/CACNA1G/RGS4/SPTBN4/SLC9A1/SCN3B/KCNH6/TRPM4/AVPR1A/CSRP3/MAP2K3/CACNG6/KCNG2/KCNIP1/MC3R/CXCR4/GJC1/PDE4B/HSPB7/SLC8A3/SEMA3A/SCN1A/ATP1B2/ADRB1/ATP1A2/PDE4D/KCNA5/ANK2/TRPC1/ATP2A1/CACNG3/ATP2B4/ITPR1/NOS1/GJA1/KCNE4/ADM/GATA4/TAC1/CACNG7/NOS1AP/EPAS1/HCN4/CACNG2/EDN3/CALCA/STC1/SLC8A2/EDN1/RGS2/HBEGF/KCNK1/ZC3H12A |
| GOBP_THIOESTER_METABOLIC_PROCESS | GOBP_THIOESTER_METABOLIC_PROCESS | 93 | 0.518606552 | 2.163099589 | 9.52E-07 | 6.71E-05 | 5.17E-05 | 3021 | tags=45%, list=19%, signal=37% | GPAM/ACOT12/PDP2/HMGCS1/MVK/DBI/ELOVL6/ACSS2/PMVK/ACOT1/MVD/ELOVL2/DLD/ACOT9/DGAT1/SUCLG2/ACOT8/ACSM2B/NUDT7/ELOVL1/ACSM1/ACSM5/SUCLA2/FAR2/GLYAT/PDHA1/ACSM3/HSD17B8/ELOVL5/ACSF2/FASN/SCD/SLC25A1/PPCS/DIP2A/PPT1/ACBD6/PIPOX/HMGCL/PDHB/MCEE/CBR4 |
| GOCC_INTRINSIC_COMPONENT_OF_POSTSYNAPTIC_SPECIALIZATION_MEMBRANE | GOCC_INTRINSIC_COMPONENT_OF_POSTSYNAPTIC_SPECIALIZATION_MEMBRANE | 63 | -0.585511845 | -2.227034821 | 1.01E-06 | 7.05E-05 | 5.43E-05 | 3441 | tags=46%, list=22%, signal=36% | LRFN2/SLC16A3/PTPRS/ADAM22/CHRNA9/DRD3/PTPRT/CLSTN2/SLITRK1/NPTN/GABRA5/SLC30A1/GLRA1/GRIK5/GABRB2/LRRTM2/LRRTM1/CHRM1/GRID1/GSG1L/NLGN1/DCC/CACNG3/CHRNA10/CDH10/CACNG7/LRFN5/CACNG2/SLITRK3 |
| GOBP_REGULATION_OF_NERVOUS_SYSTEM_DEVELOPMENT | GOBP_REGULATION_OF_NERVOUS_SYSTEM_DEVELOPMENT | 382 | -0.343430318 | -1.701667438 | 1.02E-06 | 7.05E-05 | 5.43E-05 | 2806 | tags=29%, list=18%, signal=25% | NTRK1/TLX2/YAP1/DRD3/ASPA/ZNF335/JAM2/TRIM11/MT3/PTPRZ1/GHRL/LINGO2/RELA/HAP1/SEMA6A/SEMA3C/SEMA6C/MAPT/SOX8/VAX1/HEY1/OMG/ITGAX/NOG/SMARCD3/TNFRSF21/ID1/MAP2/CLSTN2/PLXNA2/TRIM46/DBN1/RGS14/CBLN1/SLITRK1/SHANK3/KLK8/HES1/NPTN/LGI4/CCL11/GLI3/ZFYVE27/KIAA0319/SLC25A12/SEMA3D/MAP1B/NFATC4/EEF2K/KALRN/ZNF365/TG/DLL3/WNT3A/SEMA4F/ISLR2/AMIGO3/SEMA3B/CX3CL1/TTBK1/TNFRSF1B/ARHGDIA/CXCR4/NKX2-2/LRP2/GBX1/LRRTM2/PTPRD/NLGN3/EPHB1/HES2/SEMA3A/DCT/CUX2/TPBG/BMP2/TGFB1/POU4F2/NTRK2/DUSP10/VEGFA/IL1RAP/HES5/OTP/DAAM2/NLGN1/DCC/SEMA4A/FLRT3/GPR37L1/POU4F1/RND2/SLITRK2/PER2/PLXNA3/VEGFC/SOX11/MAG/WNT3/SEMA4B/ADCYAP1/SRF/LDLR/CDH4/LRP4/IL1B/TNR/NR1D1/LIF/CLCF1/IL6/SLITRK3 |
| GOBP_REGULATION_OF_TRANS_SYNAPTIC_SIGNALING | GOBP_REGULATION_OF_TRANS_SYNAPTIC_SIGNALING | 384 | -0.341352954 | -1.688755904 | 1.06E-06 | 7.26E-05 | 5.59E-05 | 3462 | tags=32%, list=22%, signal=26% | STAU1/LRFN2/STAR/CHRNB4/PTPRS/NRXN1/CRH/DLGAP1/CACNA1A/EGR2/AGER/RNF19A/SYT4/CHRNA7/SIPA1L1/EGFR/NTF3/OXTR/SYN3/CHRNB2/CALB2/ATF4/GRIN2D/NTRK1/CHRNA3/DRD3/GRM2/SHANK1/DMPK/IGSF11/ADIPOQ/ABL1/SYP/GHRL/CYP46A1/HAP1/GRIK4/CACNG5/P2RY1/KCNMB4/MAPT/STX1B/KAT2A/STX1A/CLSTN2/ARC/P2RY4/DBN1/RGS14/CBLN1/RETN/SLC12A2/SHANK3/NPTN/RGS4/GRIK3/SLC6A4/MAP1B/NFATC4/TMEM108/WNT3A/DRD5/DGKE/SLC30A1/GRM7/LZTS1/ERC2/APBA1/CX3CL1/SYNGR1/GRIK5/CRHR2/LRRTM2/PTPRD/NLGN3/SLC8A3/PLCB1/CPEB3/TUBB2B/NPTX1/DLGAP4/GRID1/CUX2/GRM4/LILRB2/NTRK2/BRSK1/NTF4/MPP2/TSHZ3/ATP1A2/GRM3/TMEM25/KCTD13/GHSR/SYT12/NLGN1/DCC/SYN1/SLC24A2/CACNG3/PPFIA2/SLC4A8/NPTX2/TAC1/ADRB2/CACNG7/SNCAIP/HOMER1/CPLX1/S1PR2/AKAP12/CACNG2/ADCYAP1/P2RX1/SRF/CPLX3/IL1B/TNR/FGF14/SLC8A2/EDN1/CCL2/FAM107A |
| GOCC_TRANSPORTER_COMPLEX | GOCC_TRANSPORTER_COMPLEX | 312 | -0.36146174 | -1.761902726 | 1.08E-06 | 7.27E-05 | 5.60E-05 | 3445 | tags=36%, list=22%, signal=29% | KCNG3/KCNIP4/CLCNKA/SCN10A/SCNN1G/CHRNB4/GABRR2/ATP1B1/CACNA1A/SCN2A/TTYH1/HCN2/CHRNA7/CACNA1E/GABRG3/ATP1A1/KCNC1/CHRNB2/FKBP1A/CHRNA9/TTYH3/GRIN2D/CHRNA3/BEST4/ABCC8/GRIA2/KCNK4/SHANK1/CACNA2D1/GLRA3/DPP10/HTR3A/CACNA1I/KCNJ1/CHRNA4/GRIK4/CACNG5/SCN5A/KCNMB4/CHRNA6/CACNG1/STX1A/TRPV6/KCNJ14/RYR2/KCNMB1/PKD1L3/SCN2B/CASQ2/CNIH3/ATP1B3/SHANK3/CACNA1G/CNGA3/GABRA5/CNGB3/GRIK3/BEST2/KCNC2/SLC9A1/SCN3B/HTR3B/TRPM4/KCNA10/CACNG6/KCNG2/KCNS1/KCNIP1/GLRA1/GRIK5/PDE4B/GABRB2/PKD1L1/KCNS2/KCNJ6/SCN1A/GLRA2/KCNB2/ATP1B2/SCNN1A/GABRR1/HSPA2/VWC2/KCNA1/SCN9A/KCNS3/ATP1A2/BEST3/GABRD/NLGN1/PDE4D/DPP6/KCNG4/KCNA5/TRPC1/KCNC3/CNGB1/ATP2A1/CACNG3/GABRA2/NOS1/ORAI1/KCNE4/CACNG7/NOS1AP/SCN7A/LRRC8B/GABRB1/HCN4/CACNG2/CPT1C/SCNN1B/KCNK1 |
| GOBP_CELLULAR_RESPONSE_TO_CORTICOSTEROID_STIMULUS | GOBP_CELLULAR_RESPONSE_TO_CORTICOSTEROID_STIMULUS | 57 | -0.585743936 | -2.194031962 | 1.13E-06 | 7.58E-05 | 5.84E-05 | 3400 | tags=51%, list=22%, signal=40% | STAR/SCNN1G/ZFP36L1/SSTR2/CRH/SSTR3/EGFR/PCK1/HNRNPU/ASS1/ISL1/SSTR5/MSTN/HEY1/SRD5A1/FLT3/KLF9/SGK1/ZFP36L2/BCL2L11/TFAP4/ICAM1/ADCYAP1/STC1/FOXO1/EDN1/SCNN1B/ZFP36/FAM107A |
| GOBP_REGULATION_OF_CHROMOSOME_SEPARATION | GOBP_REGULATION_OF_CHROMOSOME_SEPARATION | 66 | 0.546976049 | 2.105170189 | 1.18E-06 | 7.72E-05 | 5.94E-05 | 4716 | tags=67%, list=30%, signal=47% | NDC80/CDK5RAP2/ANAPC7/PTTG1/MAD2L1/ZWINT/BUB1/GEN1/CDC23/IK/AURKB/CDT1/APC/NSMCE2/TACC3/KLHL22/TRIP13/ESPL1/MAD2L2/KNTC1/XRCC3/DYNC1LI1/RB1/ANAPC11/ANAPC5/CDC20/DLGAP5/RIOK2/BUB3/CDC6/PSMG2/CDC16/LCMT1/ATM/CENPE/ANAPC4/ZW10/CDC27/CSNK2A2/CHFR/TTK/CUL3/CDC26/MAD1L1 |
| GOBP_MITOCHONDRION_ORGANIZATION | GOBP_MITOCHONDRION_ORGANIZATION | 427 | 0.328646794 | 1.65925628 | 1.19E-06 | 7.72E-05 | 5.94E-05 | 4641 | tags=41%, list=30%, signal=29% | IFIT2/CEBPA/IFI6/SPATA18/NOL3/SIRT4/TFB1M/TREM2/TNFSF10/PSMD10/IMMP1L/CDK5/C11orf65/WIPI1/ATAD3C/TIMM17A/TMEM14A/NDUFAF1/PTCD2/ATG5/PLD6/NDUFA5/YWHAZ/TMEM135/VPS11/TYMP/MTM1/PPIF/NDUFS4/NDUFA6/TP63/DDHD1/FIS1/VPS13C/LRRK2/NMT1/DYNLT1/NDUFB2/OPTN/POLG2/UBL5/NDUFB1/PHB/YME1L1/TIMM8B/AIFM2/PRDX3/HDAC6/USP30/FUNDC1/CALM3/MTFR1/MFN1/SAMM50/NDUFB4/BAG4/NDUFA10/COX18/FAM162A/FANCG/ARMC1/MAPK8/TRIAP1/COX7A2L/TMEM126B/NDUFA9/ARMCX3/FBXO7/NDUFB6/PHB2/PMPCB/SPIRE1/CHCHD3/LMAN1/SLC25A33/FNIP1/MTX3/GABARAPL2/IMMP2L/NDUFV1/RAB3A/SLC25A46/TIMM13/CISD2/HSD17B10/PANK2/HSPA4/MFF/NPEPPS/COX19/TTC19/CASP8/RHOT1/CAV2/COX7A2/SURF1/SAE1/DNM1L/SREBF2/VPS35/ATF2/RAB32/PARK7/HMGCL/MX1/AIFM1/SH3GLB1/CHCHD6/THG1L/ATG7/APOO/BCS1L/ATG3/CTSK/POLDIP2/HTRA2/FOXRED1/WASF1/GGCT/NDUFA11/OMA1/FLCN/NDUFB10/BAK1/BOK/DCN/AGK/PDCD5/FEZ1/NDUFC1/MAP1LC3A/BECN1/NDUFAB1/MIPEP/NDUFB3/HAX1/NDUFA12/SSBP1/APOOL/TFB2M/ATP13A2/AP3B1/MYH14/FBXW7/ROMO1/ATPAF1/MAN2A1/TMEM11/HSP90AA1/BAD/CTTN/SCO1/ACAD9/CSNK2A2/PYCARD/LYRM7/YWHAE/NDUFB5/NDUFS2/OXA1L/PARL/TOMM40L/TIMM23/GRPEL2/ADCK1/TOMM22/BNIP3L/SREBF1/ATP7A/PLSCR3/PPP3R1/NDUFA1/GZMB/RAB38 |
| GOMF_GROWTH_FACTOR_ACTIVITY | GOMF_GROWTH_FACTOR_ACTIVITY | 151 | -0.435280842 | -1.91893516 | 1.20E-06 | 7.72E-05 | 5.94E-05 | 2204 | tags=35%, list=14%, signal=30% | PDGFD/FGF20/OGN/TGFA/GH2/BMP3/IL4/NTF3/FGF8/EREG/FGF4/MSTN/IL12A/FGF6/ARTN/TFF1/TGFB2/FGF22/DKK1/FGF10/PDGFC/OSGIN2/FGF5/BMP6/CSF1/PGF/AMELX/PDGFB/IL11/BMP15/BMP2/JAG1/TGFB1/NTF4/VEGFA/IGF1/GDF3/PROK1/THPO/CSF3/FGF9/VEGFC/IL10/OSM/GDF5/FGF14/CXCL1/INHBB/HBEGF/LIF/TGFB3/CLCF1/IL6 |
| GOBP_NUCLEOTIDE_EXCISION_REPAIR | GOBP_NUCLEOTIDE_EXCISION_REPAIR | 101 | 0.492606982 | 2.08570305 | 1.20E-06 | 7.72E-05 | 5.94E-05 | 4658 | tags=53%, list=30%, signal=38% | XPA/CETN2/PCNA/COPS4/RFC1/POLR2K/POLD1/COPS6/OGG1/GTF2H5/POLR2E/RFC3/ATXN3/POLR2G/POLK/POLR2L/FANCC/PPIE/COPS5/HMGN1/GTF2H3/ERCC8/COPS2/ERCC6/DDB2/POLR2B/ISY1/RBX1/RFC5/USP45/RPA3/LIG4/MNAT1/POLD2/SLC30A9/RAD52/RFC4/NTHL1/POLR2J/ZNF830/ERCC4/XRCC1/POLD3/CHD1L/RPS27A/ERCC3/GPS1/RPA1/USP7/TCEA1/POLR2F/AQR/GTF2H4/PRPF19 |
| GOCC_SPINDLE | GOCC_SPINDLE | 305 | 0.354623351 | 1.717708711 | 1.46E-06 | 9.26E-05 | 7.13E-05 | 3511 | tags=34%, list=23%, signal=27% | CKAP2/ASPM/NUSAP1/PIN4/CDK5RAP2/UBXN2B/ANAPC7/TUBG2/KIF22/MAD2L1/KIF16B/EML2/SPAST/TMEM9/AURKA/NEIL2/TUBG1/SKA2/RACGAP1/NUDCD2/PKD2/INVS/VRK1/SMC6/ARL2BP/BRCC3/CKAP2L/SAC3D1/POLB/KATNAL1/DYNLT1/GOLGA2/IK/AURKB/NEDD1/TRAT1/CAPG/KIFC1/STAG1/PKP4/EPB41/KIF3A/CBX1/CALM3/NEK2/KIFAP3/TACC3/AGBL5/KATNB1/CLTA/KLHL22/MAP2K5/ECT2/YPEL5/UNC119/ESPL1/CLASP2/MAD2L2/KNTC1/YEATS2/PRC1/SPATA5/NPM1/MAEA/NEK7/HNF4G/CEP63/KIF3B/IL17RB/KIF11/TNKS/DYNC1LI1/NIN/NUP85/RB1/CLTC/KIF20A/DYNLL1/PLK4/TBCCD1/DCDC2/ANAPC5/PLEKHG6/MAPRE2/MAP7D1/CDC20/NR3C1/DLGAP5/VPS4B/TUBGCP3/STAG2/WDR62/CDC6/SPAG8/INCENP/IQCB1/CSPP1/CDC16/FLCN/XIAP/ATM/PAFAH1B1/ALMS1/CTNNB1/CENPE |
| GOMF_CATION_CHANNEL_ACTIVITY | GOMF_CATION_CHANNEL_ACTIVITY | 297 | -0.361523563 | -1.755900815 | 1.47E-06 | 9.26E-05 | 7.13E-05 | 3970 | tags=41%, list=26%, signal=31% | KCNA4/GRIN2C/CHRNA5/KCNA2/NOX5/CACNA1B/CHRNG/TMEM63C/GRIN1/LRRC52/HTR3D/KCNG1/ORAI2/KCNJ13/CACNB1/LRRC55/SLC4A11/KCNK10/KCNG3/KCNN2/KCNIP4/SCN10A/SCNN1G/CHRNB4/KCNJ9/HTR3E/CACNA1A/SCN2A/HCN2/CNGA2/CHRNA7/CACNA1E/KCNC1/CHRNB2/CHRNA9/GRIN2D/CHRNA3/TRPM6/ABCC8/GRIA2/KCNK4/CACNA2D1/HTR3A/TRPV3/KCNJ12/CACNA1I/KCNJ1/CHRNA4/GRIK4/CACNG5/SCN5A/KCNMB4/CHRNA6/CACNG1/TRPV6/KCNJ14/RYR2/KCNMB1/PKD1L3/KCNK18/SCN2B/OTOP3/CACNA1G/CNGA3/CNGB3/SLC24A3/GRIK3/TRPA1/CNGA4/KCNC2/SCN3B/KCNH6/PKD1L2/HTR3B/TRPM4/KCNA10/KCNT1/KCNN3/CACNG6/KCNG2/KCNS1/KCNIP1/PANX1/GRIK5/PKD1L1/KCNS2/KCNJ6/SCN1A/KCNB2/TPCN1/SCNN1A/OTOP2/KCNA1/SCN9A/KCNS3/KCNH3/TPCN2/CCT8L2/OTOP1/KCNH5/KCNG4/KCNA5/TRPC1/SLC24A4/KCNC3/CNGB1/SLC24A2/CACNG3/ITPR1/CHRNA10/ORAI1/KCNE4/CACNG7/SCN7A/TRPM1/HCN4/CACNG2/P2RX1/HTR3C/SCNN1B/KCNK1 |
| GOBP_DOUBLE_STRAND_BREAK_REPAIR | GOBP_DOUBLE_STRAND_BREAK_REPAIR | 192 | 0.412803479 | 1.915768173 | 1.55E-06 | 9.68E-05 | 7.45E-05 | 4487 | tags=46%, list=29%, signal=33% | GINS2/MSH2/NHEJ1/FIGNL1/MCM5/ACTR8/BRCA1/CHEK1/RAD51AP1/FEN1/NUDT16L1/SMC6/BRCC3/MCM6/POLB/ESCO2/MCM2/PARP2/OGG1/GEN1/EXD2/PSMD14/RAD51C/APLF/SMARCAD1/NSMCE2/WDR48/DCLRE1A/SMARCAL1/TP53BP1/TRIP13/PARP9/ERCC8/ERCC6/UVRAG/MAD2L2/ACTR5/XRCC3/HERC2/SPIRE1/ACTR2/XRCC4/MLH1/RPA3/LIG4/SAMHD1/DCLRE1C/RECQL/CHEK2/KAT5/SUMO1/USP51/RMI1/RAD52/DCLRE1B/MAGEF1/HMGB2/TDP1/POT1/XRCC5/ERCC4/XRCC1/RNF8/PAXIP1/ATM/VCP/EME1/NSMCE1/SETX/DDX11/XRCC2/MCM8/MGMT/OTUB2/MCM4/FANCM/WDR70/UBE2V2/HELQ/RPA1/RAD50/RAD54B/RFWD3/CDCA5/POLM/RECQL4/DDX1/RAD54L |
| GOBP_CHROMOSOME_SEPARATION | GOBP_CHROMOSOME_SEPARATION | 83 | 0.515328231 | 2.098270831 | 1.79E-06 | 0.000110318 | 8.50E-05 | 4716 | tags=61%, list=30%, signal=43% | TOP2A/NDC80/CDK5RAP2/ANAPC7/PTTG1/MAD2L1/ZWINT/BUB1/GEN1/CDC23/IK/AURKB/CDT1/APC/SMARCAD1/NSMCE2/TACC3/KLHL22/TRIP13/ESPL1/MAD2L2/KNTC1/XRCC3/MLH1/DYNC1LI1/RB1/ANAPC11/ANAPC5/CDC20/DLGAP5/RIOK2/RMI1/BUB3/CDC6/PSMG2/ERCC4/CDC16/LCMT1/ATM/CENPE/EME1/ANAPC4/ZW10/CDC27/FANCM/CSNK2A2/CHFR/TTK/CUL3/CDC26/MAD1L1 |
| GOBP_LYMPH_VESSEL_MORPHOGENESIS | GOBP_LYMPH_VESSEL_MORPHOGENESIS | 21 | -0.761726408 | -2.248857484 | 1.81E-06 | 0.000110767 | 8.53E-05 | 1358 | tags=38%, list=9%, signal=35% | PROX1/PDPN/VEGFA/VEGFC/FOXC2/ACVR2B/FOXC1/EPHA2 |
| GOBP_REGULATION_OF_VASCULATURE_DEVELOPMENT | GOBP_REGULATION_OF_VASCULATURE_DEVELOPMENT | 246 | -0.377616011 | -1.789072778 | 1.83E-06 | 0.000110767 | 8.53E-05 | 1593 | tags=20%, list=10%, signal=18% | NFE2L2/KLK3/PGF/CXCR4/TGFBR2/HSPB6/EGLN1/HIPK2/F3/IL1A/SULF1/LEP/KLF2/VEGFA/COL4A3/CEACAM1/SPINK5/SPHK1/GHSR/GATA6/TNFAIP3/SEMA4A/PROK1/ATP2B4/CXCL13/SPRY2/ANGPTL4/NOS3/VEGFC/ADM/GATA4/GPR4/C5AR1/ANGPT4/RHOB/FOXC2/ITGB8/IL10/LRG1/IL1B/THBS1/KLF4/PROK2/FOXC1/SERPINE1/ADAMTS1/EPHA2/ZC3H12A/IL6 |
| GOBP_SODIUM_ION_TRANSPORT | GOBP_SODIUM_ION_TRANSPORT | 224 | -0.389543069 | -1.824045736 | 1.88E-06 | 0.000112305 | 8.65E-05 | 2724 | tags=39%, list=18%, signal=33% | SCN10A/SCNN1G/SLC5A2/AKT1/SLC4A5/ATP1B1/FXYD6/SCN2A/HCN2/NKX2-5/ATP1A1/SLC20A2/NKAIN2/DRD3/DMPK/SLC5A7/SLC38A1/CACNA1I/SLC5A4/SCN5A/WNK4/PTPN3/SLC6A20/SLC38A8/WNK2/SCN2B/ATP1B3/HECW2/SLC12A2/CACNA1G/NKAIN1/SLC24A3/SLC13A4/SLC6A4/SLC9A4/SPTBN4/SLC9A1/SLC6A6/SLC5A6/SCN3B/SLC38A2/MLLT6/TRPM4/ATP4A/SLC34A3/SLC9A3R1/SLC6A16/SLC38A3/FXYD5/SLC20A1/SLC6A17/SLC13A5/SLC8A3/ATP6V1B1/SLC9A8/SLC4A7/SLC6A18/NETO2/SLC13A2/SCN1A/SLC5A11/SLC3A2/TPCN1/ATP1B2/SCNN1A/SLC6A11/SCN9A/SLC5A8/ATP1A2/SGK1/SLC24A4/SLC24A2/ATP2B4/NOS1/SLC4A8/ADRB2/SLC5A1/SCN7A/SLC22A4/HCN4/OSR1/SLC23A2/FGF14/SLC8A2/SCNN1B/SIK1/KCNK1 |
| GOMF_GATED_CHANNEL_ACTIVITY | GOMF_GATED_CHANNEL_ACTIVITY | 314 | -0.352790719 | -1.715518563 | 1.90E-06 | 0.000112305 | 8.65E-05 | 4519 | tags=45%, list=29%, signal=33% | KCND3/GABRP/TRPM5/CACNG8/GABRA6/CLIC6/KCNH4/CACNA1F/GABRA1/GRIN3A/KCND2/KCNQ2/SCN3A/KCNQ4/GRIK1/CNGA1/CLCA4/CLIC5/KCNK12/KCNA4/GRIN2C/CHRNA5/KCNA2/CACNA1B/CHRNG/TMEM63C/GRIN1/LRRC52/HTR3D/KCNG1/KCNJ13/CACNB1/LRRC55/KCNK10/KCNG3/KCNN2/KCNIP4/CLCNKA/SCN10A/SCNN1G/CHRNB4/KCNJ9/HTR3E/GABRR2/CACNA1A/SCN2A/TTYH1/HCN2/CNGA2/CHRNA7/CACNA1E/GABRG3/KCNC1/CHRNB2/CHRNA9/TTYH3/GRIN2D/CHRNA3/ABCC8/GRIA2/KCNK4/CACNA2D1/GLRA3/HTR3A/KCNJ12/CACNA1I/KCNJ1/CHRNA4/GRIK4/CACNG5/SCN5A/KCNMB4/CHRNA6/CACNG1/KCNJ14/RYR2/KCNMB1/KCNK18/SCN2B/ANO7/CACNA1G/CNGA3/GABRA5/CLCA1/CNGB3/GRIK3/TRPA1/CNGA4/KCNC2/SCN3B/KCNH6/HTR3B/TRPM4/KCNA10/KCNT1/KCNN3/CACNG6/KCNG2/KCNS1/KCNIP1/TMC5/NOX1/GLRA1/GRIK5/GABRB2/KCNS2/KCNJ6/GRID1/SCN1A/GLRA2/KCNB2/TPCN1/SCNN1A/GABRR1/KCNA1/SCN9A/KCNS3/KCNH3/TPCN2/GABRD/CCT8L2/KCNH5/KCNG4/KCNA5/KCNC3/CNGB1/CACNG3/GABRA2/ITPR1/CHRNA10/KCNE4/CACNG7/SCN7A/GABRB1/HCN4/CACNG2/P2RX1/TMC7/HTR3C/SCNN1B/KCNK1 |
| GOBP_REGULATION_OF_CHROMOSOME_SEGREGATION | GOBP_REGULATION_OF_CHROMOSOME_SEGREGATION | 79 | 0.532137965 | 2.136743336 | 1.91E-06 | 0.000112305 | 8.65E-05 | 4716 | tags=65%, list=30%, signal=45% | NDC80/CDK5RAP2/ANAPC7/PTTG1/MAD2L1/ZWINT/BUB1/SMC6/GEN1/CDC23/IK/AURKB/CDT1/APC/NSMCE2/TACC3/KLHL22/TRIP13/ESPL1/MAD2L2/KNTC1/XRCC3/DYNC1LI1/RB1/ANAPC11/RAD18/ANAPC5/CDC20/DLGAP5/RIOK2/BUB3/CDC6/PSMG2/CDC16/LCMT1/ATM/CENPE/BECN1/ANAPC4/ZW10/CDC27/PUM2/KIF2C/CSNK2A2/CHFR/MKI67/TTK/CUL3/PUM1/CDC26/MAD1L1 |
| GOCC_UBIQUITIN_LIGASE_COMPLEX | GOCC_UBIQUITIN_LIGASE_COMPLEX | 250 | 0.376384032 | 1.790995806 | 1.94E-06 | 0.000113038 | 8.71E-05 | 4637 | tags=47%, list=30%, signal=34% | ANAPC7/FBXO8/FBXO27/FBXO2/BRCA1/DTL/KLHL12/SKP2/CBX8/KLHL3/CCNF/BRCC3/FBXO48/DERL2/CDC23/FZR1/OS9/SEL1L/KEAP1/SPOP/USP47/DCUN1D1/FBXO6/RNF20/RNF7/STUB1/MED7/RNF14/CBX4/AMFR/RNF144B/KLHL22/KLHL7/DET1/CUL5/YPEL5/FBXO7/ERCC8/DERL3/MAD2L2/SKP1/CAND1/MED11/DDB2/RANBP9/BTRC/MAEA/CKS1B/RBX1/USP33/FBXO25/TSPAN17/AMN1/FBXL4/FBXL5/UBR3/CDKN1B/PCGF6/ANAPC11/RAD18/MED31/FBXL17/ANAPC5/MED1/CDC20/SMURF2/MED10/ARMC8/GLMN/ANAPC2/CKS2/KLHL13/ATG3/FBXO4/ANKRD39/FBXW5/CDC16/NEDD4/MED30/SPOPL/RNF8/UBE2E1/CACYBP/CBX2/KLHL24/CRBN/RMND5A/FBXO38/SPSB2/MED20/UBE2L6/CUL7/FBXO17/ANAPC4/FAM8A1/FBXO32/ANAPC10/RANBP10/TRIM21/CDC27/KLHL2/FBXW7/DYRK2/UBR1/PCGF5/FBXL18/CUL1/WDTC1/DCAF16/SUGT1/UBXN8/RBCK1/MIB2/CUL3/DCUN1D4/CDC26/UBE4B/UBR2 |
| GOBP_NEGATIVE_REGULATION_OF_CELL_ADHESION | GOBP_NEGATIVE_REGULATION_OF_CELL_ADHESION | 256 | -0.372992559 | -1.773331706 | 2.18E-06 | 0.000126198 | 9.72E-05 | 1751 | tags=19%, list=11%, signal=17% | BMP6/LRRC32/CCL25/AKNA/FXYD5/PLA2G2D/CX3CL1/FZD7/ARHGDIA/DUSP1/BMP2/JAG1/LILRB2/TGFB1/MUC21/EFNA5/VEGFA/CCL21/CEACAM1/IRF1/FBLN1/CDH13/JAK3/PODXL/CD274/PLXNA3/MYADM/DTX1/CD9/ARG2/SCGB1A1/IL10/PELI1/IL1RN/TNR/APOD/TACSTD2/SDC4/SPRY4/THBS1/KLF4/BCL6/IL4R/RND1/SERPINE1/FAM107A/SOCS1/ZC3H12A |
| GOBP_REGULATION_OF_MEMBRANE_POTENTIAL | GOBP_REGULATION_OF_MEMBRANE_POTENTIAL | 402 | -0.335917531 | -1.675400619 | 2.28E-06 | 0.000130738 | 0.00010071 | 3936 | tags=37%, list=25%, signal=28% | GRIN2C/DLG4/CHRNA5/MLLT11/KCNA2/RIMS1/DRD4/NPAS4/CACNA1B/DRD2/RIMS2/CHRNG/GRIN1/CCK/HTR3D/PIP5KL1/GNAQ/KCNK10/KDR/KCNN2/GABBR1/SCN10A/CHRNB4/HTR3E/AKT1/GABRR2/NRXN1/DSP/ATP1B1/BCO2/CACNA1A/SCN2A/CLDN19/HCN2/GCLM/CHRNA7/CACNA1E/NPPA/GABRG3/ATP1A1/CHRNB2/CHRNA9/MYOC/NTSR1/MTNR1B/SOD2/GRIN2D/CHRNA3/KCNK4/SHANK1/CACNA2D1/CNTNAP1/BVES/DMPK/GLRA3/IGSF11/HTR3A/ABL1/GHRL/CACNA1I/WWP2/CHRNA4/GRIK4/JUP/SCN5A/KCNMB4/MAPT/STX1B/CHRNA6/STX1A/PTPN3/RYR2/KCNK18/CAV1/SCN2B/CASQ2/CNIH3/ATP1B3/CBLN1/SHANK3/CACNA1G/GABRA5/RGS4/WDR1/UCN3/GRIK3/BEST2/KCNC2/SLC9A1/SCN3B/KCNH6/TMEM108/HTR3B/TRPM4/PMAIP1/GLRA1/GJC1/GRIK5/GABRB2/NLGN3/SLC8A3/CHRM1/GRID1/SCN1A/GLRA2/CUX2/ATP1B2/ADRB1/GABRR1/NTRK2/KCNA1/MPP2/SCN9A/KCNH3/GOT1/ATP1A2/GABRD/GPR88/TMEM25/SEZ6/NLGN1/GNA11/KCNH5/KCNA5/FHL1/ANK2/GABRA2/CHRNA10/SLC4A8/GJA1/KCNE4/TAC1/ADRB2/NOS1AP/S1PR2/GNA15/SCN7A/GABRB1/HCN4/CACNG2/ADCYAP1/P2RX1/HTR3C/JUN/FGF14/SLC8A2/EDN1/KCNK1 |
| GOBP_REGULATION_OF_CELL_CYCLE_G2_M_PHASE_TRANSITION | GOBP_REGULATION_OF_CELL_CYCLE_G2_M_PHASE_TRANSITION | 189 | 0.406988475 | 1.88042253 | 2.31E-06 | 0.000131155 | 0.000101031 | 3589 | tags=38%, list=23%, signal=30% | NINL/CDK5RAP2/PSMD10/BRCA1/DTL/CETN2/CEP290/CHEK1/AURKA/HMMR/TUBG1/PSMB9/PBX1/PSMA2/BRCC3/PSMB7/DYNC1I2/PSME2/FZR1/MTA3/PSMD14/RAD51C/AURKB/DONSON/USP47/CEP78/PSMA4/SDCCAG8/NEDD1/ZFYVE19/CEP250/RFPL1/PSMD4/NAE1/NEK2/CEP152/PSMD7/PSMD1/RAD17/PSMA3/PSMD13/SKP1/CEP70/NPM1/RBX1/PSMD11/CEP63/CEP192/DYNLL1/PLK4/DYNC1H1/SYF2/PSMA1/PSMB10/PSMC6/PSMB5/CENPJ/VPS4B/CLSPN/PRKACA/PSMC4/CDC6/ZNF830/PSMC3/PSME1/FOXO4/PAXIP1/ATM/PAFAH1B1/ALMS1/PSMB1/PSMD2 |
| GOBP_REGULATION_OF_MUSCLE_SYSTEM_PROCESS | GOBP_REGULATION_OF_MUSCLE_SYSTEM_PROCESS | 204 | -0.395303688 | -1.828562415 | 2.45E-06 | 0.000138109 | 0.000106388 | 3557 | tags=36%, list=23%, signal=28% | MYOCD/G6PD/ITGA2/CHGA/SCN10A/LMCD1/DSP/SSTR2/ATP1B1/SGCA/LMNA/TACR1/NKX2-5/NPPA/ENO1/ATP1A1/OXTR/CHRNA3/DMPK/HAMP/GHRL/MSTN/JUP/SCN5A/ADA/RYR2/CAV1/CASQ2/PRKAG3/CDK9/RGS4/SLC9A1/PDE9A/TBXA2R/TRPM4/TNFRSF1B/PDE4B/HSPB6/SLC8A3/FOXO3/KCNB2/KCNA1/IGF1/ATP1A2/SPHK1/GHSR/PI16/PDE4D/ANK2/SMAD3/ATP2A1/ATP2B4/NOS1/NOS3/GATA4/ADRB2/MYL9/NR4A3/HCN4/P2RX1/SRF/TNFRSF1A/CALCA/STC1/CNN1/PPARGC1A/FOXO1/EDN1/RGS2/KLF4/MYBPH/PROK2/ZC3H12A |
| GOBP_NEGATIVE_REGULATION_OF_INFLAMMATORY_RESPONSE | GOBP_NEGATIVE_REGULATION_OF_INFLAMMATORY_RESPONSE | 115 | -0.462165269 | -1.953014427 | 2.76E-06 | 0.000154221 | 0.000118799 | 3327 | tags=37%, list=21%, signal=30% | IL13/LPCAT3/IL2RA/CD200/IL4/ALOX5/ISL1/NFKB1/ADIPOQ/HAMP/GHRL/MEFV/GPR17/MFHAS1/ADA/SIGLEC10/MMP26/NLRP12/FEM1A/FPR2/CX3CL1/TNFRSF1B/NOD2/DUSP10/METRNL/GATA3/IGF1/GHSR/TNFAIP3/SMAD3/FNDC4/SIRPA/SAA1/LRFN5/TYRO3/ADCYAP1/LDLR/TNFRSF1A/IL10/TNFAIP6/NR1D1/KLF4/SOCS3 |
| GOBP_ORGANELLE_FISSION | GOBP_ORGANELLE_FISSION | 394 | 0.329134563 | 1.648961601 | 2.82E-06 | 0.000156277 | 0.000120383 | 3587 | tags=34%, list=23%, signal=27% | WNT5A/NCAPG2/NUSAP1/TOP2A/NDC80/REEP4/FIGNL1/CDK5RAP2/UBXN2B/CHMP4A/C11orf80/ANAPC7/DSN1/PTTG1/NPM2/KLHDC8B/TUBG2/KIF22/MAD2L1/C11orf65/ING2/SPAST/CHEK1/ZWINT/AURKA/RAD51AP1/SMC2/TUBG1/STAG3/RACGAP1/RCC1/BUB1/TOM1L1/TMEM135/VRK1/ANLN/DNMT3L/CENPK/GEN1/CDC23/DDHD1/FIS1/SMC4/LRRK2/GOLGA2/FZR1/IK/CHMP5/RAD51C/AURKB/NCAPD2/MIS12/CDT1/ACOT8/REEP3/PPP1R9B/CHMP6/NCAPG/CCNB2/APC/KIFC1/STAG1/MTFR1/CHMP2A/NSMCE2/NEK2/TACC3/KATNB1/MND1/KLHL22/TRIP13/ESPL1/CLASP2/PSMD13/NEK9/CD28/MAD2L2/PHB2/PEX11B/KNTC1/XRCC3/PRC1/CHTF8/NUF2/SPIRE1/PRKCB/ACTR2/MLH1/KIF3B/SLC25A46/NME6/KIF11/TNKS/CEP192/DYNC1LI1/PDGFRB/RB1/ANAPC11/MFF/ATRX/ANAPC5/CHEK2/CAV2/CDC20/DLGAP5/DNM1L/CALR/VPS35/RIOK2/RMI1/BUB3/MX1/VPS4B/SEC16B/STAG2/PEX11A/CKS2/CDC6/PSMG2/BTC/INCENP/NSL1/ERCC4/FBXW5/CHMP1A/CDC16/LCMT1/NCAPD3/ATM/CENPE/DCN/EME1/DSCC1/DRG1 |
| GOBP_REGULATION_OF_CHEMOTAXIS | GOBP_REGULATION_OF_CHEMOTAXIS | 198 | -0.401097032 | -1.846134558 | 3.09E-06 | 0.000169873 | 0.000130856 | 2536 | tags=30%, list=16%, signal=26% | MSTN/ANGPT2/IL12A/SEMA6A/SEMA3C/SEMA6C/MET/ARTN/S1PR1/MMP28/FGF10/SEMA3D/RAC1/WNT3A/CSF1/SEMA4F/PGF/FPR2/SEMA3B/EFNB2/CXCR4/DUSP1/PDGFB/AKIRIN1/CCR7/AZU1/TUBB2B/RIN3/SEMA3A/NOD2/F3/NTRK3/TPBG/TGFB1/POU4F2/MTUS1/VEGFA/CCL21/LBP/CDH13/SEMA4A/SMAD3/CCL26/CXCL13/PLXNA3/VEGFC/C5AR1/CCL3/CCL7/ZSWIM4/FGFR1/WNT3/SEMA4B/EDN3/LPAR1/EDN1/THBS1/CCL2/SERPINE1/IL6 |
| GOBP_ANAPHASE_PROMOTING_COMPLEX_DEPENDENT_CATABOLIC_PROCESS | GOBP_ANAPHASE_PROMOTING_COMPLEX_DEPENDENT_CATABOLIC_PROCESS | 77 | 0.539991359 | 2.162686631 | 3.40E-06 | 0.00018538 | 0.000142801 | 4615 | tags=60%, list=30%, signal=42% | ANAPC7/PTTG1/PSMD10/MAD2L1/AURKA/PSMB9/PSMA2/PSMB7/CDC23/PSME2/FZR1/PSMD14/AURKB/PSMA4/PSMD4/PSMD7/PSMD1/PSMA3/PSMD13/PSMD11/ANAPC11/PSMA1/ANAPC5/CDC20/PSMB10/PSMC6/PSMB5/BUB3/PSMC4/ANAPC2/PSMC3/CDC16/PSME1/UBE2E1/PSMB1/PSMD2/PSMA5/ANAPC4/ANAPC10/RPS27A/CDC27/PSMC5/PSMB8/CUL3/PSMB4/CDC26 |
| GOBP_VESICLE_TARGETING | GOBP_VESICLE_TARGETING | 83 | 0.507674485 | 2.067106941 | 3.46E-06 | 0.000186757 | 0.000143862 | 3957 | tags=54%, list=25%, signal=41% | C17orf75/KLHL12/SCFD1/GOSR1/TRIP11/WIPI1/TRAPPC6B/TRAPPC6A/F8/GOLGA2/EXOC4/TFG/SEC13/BET1/TMED10/TBC1D23/NSF/FAM91A1/SEC24A/SEC24D/SEC23A/CTSZ/GOSR2/TRAPPC2/CLASP2/PSEN1/LMAN1/SEC31A/SNAP23/TMED2/CTSC/GBF1/SEC16B/SAR1B/ARFGAP2/MCFD2/TRAPPC3/STARD3NL/SAR1A/TBC1D20/SEC24C/STX5/USO1/TRAPPC2L/YKT6 |
| GOBP_RESPONSE_TO_INORGANIC_SUBSTANCE | GOBP_RESPONSE_TO_INORGANIC_SUBSTANCE | 494 | -0.315671673 | -1.602777155 | 3.58E-06 | 0.000189979 | 0.000146344 | 2594 | tags=24%, list=17%, signal=20% | ABL1/MT3/HAMP/ITPKB/RELA/BRAF/SLC30A3/SCN5A/TRAP1/MT2A/KCNMB4/MAPT/CD14/TFAP2A/TRPV6/MET/ADA/RYR2/KCNMB1/GCH1/CAV1/SYT15/CASQ2/CPNE8/SLC11A2/APOBEC1/AQP3/TH/HMOX1/PHEX/HAAO/TFF1/SLC12A2/CACNA1G/CNGA3/MT1E/PLSCR1/SLC25A12/TRPA1/MAP1B/NFATC4/EEF2K/KCNC2/MT1F/SLC38A2/BMP6/AVPR1A/SLC30A1/RASA4/MT1X/ANXA11/RAD51/NFE2L2/AMELX/GLRA1/DUSP1/LDHA/TPH2/CCR7/EGLN1/CYP1A2/ACER1/GLRA2/SLC30A8/IL1A/CPNE6/NPC1/KLF2/KCNA1/GOT1/MMP3/CRIP1/SPHK1/SOD3/SYT12/NLGN1/CRYAB/TNFAIP3/KCNA5/CYP1A1/PENK/TRPC1/ALOX5AP/S100A8/GPR37L1/ATP2B4/ADCY10/SIRPA/KDM6B/HPCA/NOS3/HOMER1/SLC5A1/ICAM1/NR4A3/RHOB/CACNG2/SCGB1A1/IL10/JUN/MT1M/ERN1/PPARGC1A/IL18RAP/FOXO1/EDN1/MT1A/THBS1/KLF4/MT1B/IGFBP2/FOSL1/ZC3H12A/JUNB/FOS/IL6/FOSB |
| GOBP_RESPONSE_TO_MINERALOCORTICOID | GOBP_RESPONSE_TO_MINERALOCORTICOID | 30 | -0.692013932 | -2.233898287 | 3.58E-06 | 0.000189979 | 0.000146344 | 860 | tags=27%, list=6%, signal=25% | SGK1/CDKN1A/TRH/EDN1/SCNN1B/FOSL1/FOS/FOSB |
| GOMF_OXIDOREDUCTASE_ACTIVITY_ACTING_ON_CH_OH_GROUP_OF_DONORS | GOMF_OXIDOREDUCTASE_ACTIVITY_ACTING_ON_CH_OH_GROUP_OF_DONORS | 122 | 0.454555454 | 1.964907055 | 3.60E-06 | 0.000189979 | 0.000146344 | 2602 | tags=34%, list=17%, signal=28% | AKR1B10/ME1/ADH5/ABCC4/AKR1A1/GPD1/HPGD/UEVLD/DHRS9/SDR42E1/IDH1/DHRS11/UGDH/NSDHL/HSD11B1/HSD17B13/RDH11/HADH/HAO1/PTGR2/BDH2/L2HGDH/PTGR1/SRD5A2/SPR/AKR1B1/RDH16/ALDH3A1/BDH1/MDH1/KCNAB2/HMGCR/HSD17B8/AKR1D1/PGD/EHHADH/ADH6/HSD17B10/D2HGDH/RDH5/FASN |
| GOBP_MUSCLE_CONTRACTION | GOBP_MUSCLE_CONTRACTION | 322 | -0.351526952 | -1.719182713 | 3.75E-06 | 0.000195113 | 0.000150299 | 3434 | tags=30%, list=22%, signal=24% | CHGA/GAA/KCNN2/SCN10A/LMOD3/DSP/SSTR2/ATP1B1/SGCA/PPP1R13L/ANKRD2/TACR1/NKX2-5/MYL4/TPM2/NPPA/LMOD1/ACTC1/ENO1/ATP1A1/SMTN/OXTR/CHRNB2/CHRNA3/ATP8A2/CACNA2D1/DMPK/GHRL/KCNJ12/JUP/SCN5A/ADA/RYR2/CAV1/SCN2B/CASQ2/CACNA1G/SLC9A1/SCN3B/MYH13/VCL/TBXA2R/TRPM4/LTB4R/CSRP3/MAP2K3/GLRA1/CXCR4/GJC1/PDE4B/SSPN/HSPB6/SLC8A3/SCN1A/ACTA2/SULF1/KCNB2/SORBS1/TMOD4/MYOM3/KCNA1/ATP1A2/TPCN2/SPHK1/GHSR/CRYAB/PDE4D/KCNA5/ANK2/ATP2A1/ATP2B4/NOS1/TMOD1/GJA1/KCNE4/GATA4/ADRB2/MYL9/HOMER1/NOS1AP/SCN7A/ARG2/HCN4/P2RX1/SRF/EDN3/CALCA/STC1/CNN1/MYH11/EDN1/RGS2/SCNN1B/MYBPH/MYOM1/PROK2/ACTG2/ZC3H12A |
| GOBP_REGULATION_OF_CELL_CELL_ADHESION | GOBP_REGULATION_OF_CELL_CELL_ADHESION | 398 | -0.328572368 | -1.634288277 | 3.76E-06 | 0.000195113 | 0.000150299 | 2934 | tags=26%, list=19%, signal=22% | IFNG/ALOX5/PDCD1/PCK1/TNFSF11/CD276/SOX2/ASS1/FOXA2/C1QTNF1/ADIPOQ/ABL1/HHLA2/CEBPB/CELSR2/ITPKB/RELA/IL12A/PKHD1/PCDH8/TNFRSF21/TNFSF9/ADA/CAV1/CEACAM6/ZMIZ1/HES1/GLI3/NRARP/IL23R/IRAK1/CTLA4/RAC1/BMP6/WNT3A/ADAM19/LRRC32/CCL25/AKNA/FXYD5/PLA2G2D/CX3CL1/TFRC/PRKCQ/TGFBR2/CCR7/NOD2/PDPN/IL1A/FUT3/BMP2/JAG1/LILRB2/TGFB1/LEP/MUC21/DUSP10/EFNA5/VEGFA/GATA3/IGF1/CCL21/CEACAM1/IRF1/FLOT2/JAK3/PODXL/EBI3/CXCL13/EPO/TNFRSF13C/CD274/SIRPA/MYADM/CSK/TNFSF14/SIRPB1/DTX1/ICAM1/CD9/NR4A3/ARG2/SCGB1A1/PLAUR/SLC7A1/EGR3/IL10/PELI1/IL1RN/HAS2/MAP3K8/IL1B/TNR/SDC4/NFKBIZ/KLF4/BCL6/IL4R/CCL2/IGFBP2/SOCS1/ZC3H12A/IL6 |
| GOCC_INNER_MITOCHONDRIAL_MEMBRANE_PROTEIN_COMPLEX | GOCC_INNER_MITOCHONDRIAL_MEMBRANE_PROTEIN_COMPLEX | 92 | 0.501666698 | 2.088833508 | 3.80E-06 | 0.000195513 | 0.000150607 | 5709 | tags=65%, list=37%, signal=42% | IMMP1L/TIMM17A/NDUFAF1/NDUFA5/PPIF/NDUFS4/NDUFA6/NDUFB2/NDUFB1/PHB/SAMM50/NDUFB4/NDUFA10/NDUFA9/NDUFB6/PHB2/CHCHD3/UQCRB/MTX3/UQCRQ/IMMP2L/NDUFV1/UQCRC2/CHCHD6/SDHA/APOO/BCS1L/FOXRED1/NDUFA11/NDUFB10/AGK/NDUFC1/NDUFAB1/NDUFB3/NDUFA12/APOOL/ROMO1/COX6A1/UQCRC1/SDHD/NDUFB5/NDUFS2/TIMM23/GRPEL2/SDHC/NDUFA1/NDUFS5/COX4I1/NDUFS8/IMMT/NDUFS7/NDUFB11/MTX2/NDUFA8/NDUFA2/NDUFV2/NDUFA7/NDUFC2/NDUFB7/DNAJC15 |
| GOBP_TISSUE_MIGRATION | GOBP_TISSUE_MIGRATION | 281 | -0.361849266 | -1.739544329 | 4.01E-06 | 0.000203646 | 0.000156872 | 1708 | tags=17%, list=11%, signal=16% | TBXA2R/MAP2K3/NFE2L2/S100A2/DNAJA4/EFNB2/PDGFB/TGFBR2/PROX1/KRT16/GRHL2/SEMA3A/BCAR1/PKN3/ACTA2/TGFB1/DUSP10/FOXP1/VEGFA/GATA3/INSL3/CEACAM1/CDH13/SEMA4A/ATP2B4/CXCL13/NOS3/VEGFC/TAC1/ANGPT4/FGFR1/RHOB/FOXC2/SRF/EGR3/HAS2/STC1/TACSTD2/EDN1/HBEGF/THBS1/KLF4/S100P/PTGS2/ACTG2/NR4A1/EPHA2/ZC3H12A/VIL1 |
| GOBP_PROTEIN_POLYUBIQUITINATION | GOBP_PROTEIN_POLYUBIQUITINATION | 314 | 0.338359157 | 1.655087428 | 4.02E-06 | 0.000203646 | 0.000156872 | 5165 | tags=46%, list=33%, signal=32% | IFI27/TRIM22/AKTIP/ANAPC7/TRIM5/PSMD10/FBXO27/FBXO2/BRCA1/DTL/NHLRC1/TRIM68/UBE2T/HERC6/SKP2/PSMB9/KLHL3/PSMA2/CCNF/TRIM32/TRIM14/PSMB7/CDC23/PSME2/FZR1/PSMD14/SPOP/NMI/FBXO6/PSMA4/RNF20/PSMD4/HDAC6/FBXW2/STUB1/PSMD7/RNF186/RNF14/PSMD1/TRAF3/AMFR/RNF144B/PSMA3/FBXO7/ERCC8/PSMD13/NHLRC3/CDC34/SKP1/RNF213/DDB2/BTRC/FBXO22/RBX1/BFAR/PSMD11/UBE2Q2/FBXL4/FBXL5/RNF26/TNKS/ANAPC11/UBE2H/PPIA/NPEPPS/HACE1/FBXL17/RNF146/PSMA1/ANAPC5/PSMB10/RNF5/SMURF2/PSMC6/PSMB5/TAF1/PSMC4/ANAPC2/LRSAM1/RNF216/TRIM56/RNF34/PSMC3/FBXO4/ANKRD39/FBXW5/CDC16/NEDD4/PSME1/XIAP/RNF8/UBE2E1/CTNNB1/PSMB1/TTC36/PSMD2/RMND5A/FBXO38/ZNRF1/UBE2L6/FBXO17/PSMA5/ANAPC4/FBXO32/UBE2E3/ANAPC10/TRIM21/RPS27A/CDC27/OTUB2/FBXW7/UBE2V2/FBXL18/TRIM6/PSMC5/CUL1/CHFR/TNKS2/PSMB8/RBCK1/MIB2/CUL3/PSMB4/CDC26/UBE4B/UBR2/PRPF19/FBXL14/ANAPC13/RC3H2/TTC3/PSMD6/FBXW8/CBL/RNF114/DCAF15/UBE2N/PPIL2/KLHL20/UBE2G1/DZIP3/FBXL3/PSMA6/FBXL7/UBB/FBXL19 |
| GOBP_MEMBRANE_DOCKING | GOBP_MEMBRANE_DOCKING | 160 | 0.420180404 | 1.890401999 | 4.19E-06 | 0.000210564 | 0.000162201 | 4461 | tags=45%, list=29%, signal=32% | NINL/VPS45/CDK5RAP2/CETN2/SCFD1/CEP290/STX17/TUBG1/RAB8A/STX8/VPS11/CFTR/VTI1B/DYNC1I2/STX7/EXOC4/CEP78/SDCCAG8/SCFD2/NEDD1/NSF/CEP250/STXBP3/VAMP8/KCNB1/VAMP3/NEK2/CEP152/TCTN1/PSEN2/CEP70/STX2/RAB3A/CEP63/ROCK1/CEP192/STX10/EXOC6/DYNLL1/PLK4/RAB10/STX4/DYNC1H1/CAV2/RAB12/CENPJ/PRKACA/IQCB1/TCTN2/STX16/UNC13B/PEX16/B9D1/PAFAH1B1/ALMS1/VPS33A/STX19/STX5/OFD1/USO1/CEP97/YKT6/SNX3/MSN/HSP90AA1/VAPB/AHCYL1/STX6/YWHAE/AKAP9/RABEPK/DCTN3 |
| GOBP_POSITIVE_REGULATION_OF_PROTEIN_KINASE_ACTIVITY | GOBP_POSITIVE_REGULATION_OF_PROTEIN_KINASE_ACTIVITY | 483 | -0.313838078 | -1.592821078 | 4.24E-06 | 0.000211687 | 0.000163066 | 2023 | tags=18%, list=13%, signal=17% | DKK1/IL23R/IRAK1/FGF10/PTPN1/AVPI1/PDGFC/BIRC7/WNT3A/CSF1/MAP2K3/CCNT1/MAPRE3/ADCY5/TTBK1/CXCR4/ADCY3/FGD2/PDGFB/SLC27A1/TGFBR2/PROX1/CCR7/AZU1/FLT3/DUSP9/DDX3X/NOD2/NTRK3/PSRC1/GRM4/MAS1/BMP2/TGFB1/LEP/AXIN1/MAPKAPK2/NTRK2/EFNA5/VEGFA/IGF1/RAPGEF1/CCL21/TNFRSF10B/IRAK2/DUSP5/PROK1/NEDD9/ATP2B4/EPO/CDKN1A/SPRY2/ARHGEF5/VEGFC/SAA1/ADRB2/CSK/C5AR1/ANGPT4/S1PR2/FGFR1/IGFBP6/CASS4/ADCYAP1/SBK2/FPR1/SLC11A1/DUSP6/EDN3/ERN1/CALCA/LPAR1/MAP3K8/MAP3K14/IL1B/SLC8A2/EDN1/HBEGF/SDC4/S100A12/TNIK/THBS1/GADD45B/TGFB3/GPRC5A/PROK2/GADD45G/SOCS1/EGR1 |
| GOBP_PROTEIN_LOCALIZATION_TO_ENDOPLASMIC_RETICULUM | GOBP_PROTEIN_LOCALIZATION_TO_ENDOPLASMIC_RETICULUM | 137 | 0.441695398 | 1.951662336 | 4.30E-06 | 0.000213012 | 0.000164087 | 4725 | tags=54%, list=30%, signal=38% | RPS4Y1/CHMP4A/KDELR3/RPS21/SPCS2/SGTB/SSR3/MIA3/LRRK2/OS9/RPL7A/RPS26/SEC61G/SEC61A2/RPSA/RPS7/SRP14/RPL26/RPL23A/RPL37/RPL7/HSPA5/RPL35A/RPL13A/RPS23/RPS29/RPL8/GABARAPL2/RPL15/RPLP0/RPL34/SPCS3/RPL17/RPS3A/RPL41/RER1/RAB10/ZFAND2B/INSIG2/GBF1/RPS2/TAPT1/SEC16B/SRP9/RAB3GAP2/SRP54/RPL29/RPL9/DDRGK1/KDELR2/RPL11/RTN4/RPS15A/RPL3/TRAM1/RPL21/RPS27A/RPS3/RPL31/SEC63/RPS9/RPL27A/RPS24/SRP72/RPS12/HERPUD1/RPS8/SRP68/RPL23/UBAC2/SEC62/GPAA1/RPL22/TRAM1L1 |
| GOBP_MUSCLE_ORGAN_DEVELOPMENT | GOBP_MUSCLE_ORGAN_DEVELOPMENT | 283 | -0.35739194 | -1.718347726 | 4.68E-06 | 0.000229854 | 0.00017706 | 3631 | tags=35%, list=23%, signal=27% | JPH1/BASP1/LAMA5/MYOCD/HIVEP3/SOX15/CFL2/COL6A3/MYOZ1/ZBTB42/SIRT6/LMOD3/USP2/DSP/MSC/SGCA/EGR2/ANKRD2/ITGA11/NKX2-5/HOXD9/ACTC1/WNT10B/TCF21/SMTN/SKI/FKBP1A/DDX5/FGF8/ASS1/COL19A1/ZNF609/ISL1/ZFHX3/BVES/SIRT1/MSTN/HOXD10/DISP1/SOX8/VAX1/NOG/TCF15/JPH2/RYR2/CAV1/FLNB/S1PR1/TGFB2/KEL/SAP30/SMYD1/RBM24/FHL3/WNT3A/CSRP3/CTF1/PAX5/LRP2/AKIRIN1/PROX1/EPHB1/SIX4/EID2B/UNC45B/BMP2/TGFB1/LOX/IGF1/HAND1/ELN/TGFBR3/CRYAB/FHL1/BTG2/SMAD3/PHOX2B/POU4F1/ALX4/WT1/NPHS1/ATF3/HOMER1/SOX11/MKX/FOXC2/EGR3/MSX1/TEAD4/ARID5B/TAGLN/MAFF/KLF5/HBEGF/LIF/MYOM1/FOXC1/FOS/EGR1 |
| GOMF_PHOSPHATIDYLINOSITOL_3_KINASE_REGULATOR_ACTIVITY | GOMF_PHOSPHATIDYLINOSITOL_3_KINASE_REGULATOR_ACTIVITY | 19 | -0.766033049 | -2.193584837 | 4.77E-06 | 0.000232579 | 0.000179159 | 107 | tags=26%, list=1%, signal=26% | CISH/KLF4/SOCS3/SOCS2/SOCS1 |
| GOMF_ELECTRON_TRANSFER_ACTIVITY | GOMF_ELECTRON_TRANSFER_ACTIVITY | 118 | 0.459078957 | 1.990019546 | 4.82E-06 | 0.000233034 | 0.00017951 | 5623 | tags=63%, list=36%, signal=40% | ME1/ADH5/AKR1A1/P4HA2/DMGDH/COX15/GPX2/QDPR/NDUFA5/NDUFS4/NDUFA6/NQO2/CYB5B/NDUFB2/NDUFB1/AIFM2/AKR1B1/COX11/RDH16/NDUFB4/GLDC/NDUFA10/COX7A2L/MAOB/NDUFA9/NDUFB6/ASPH/UQCRQ/NDUFV1/COX7A2/SURF1/ETFA/FDX1/COX6C/SDHA/NDUFB10/COX6B1/XDH/NDUFC1/IDO1/ME2/NCF2/NDUFAB1/NDUFB3/NDUFA12/ETFB/HSD17B6/COX6A1/GLRX2/UQCRC1/SDHD/NDUFB5/NDUFS2/CYBB/SDHC/CIAPIN1/NDUFA1/AKR1C4/NDUFS5/COX4I1/IDH3B/NDUFS8/ALDH4A1/NDUFS7/COX5B/PHGDH/CYB5A/DHRS3/NDUFA8/NDUFA2/NDUFV2/NDUFA7/NDUFC2/NDUFB7 |
| GOBP_NEGATIVE_REGULATION_OF_RESPONSE_TO_EXTERNAL_STIMULUS | GOBP_NEGATIVE_REGULATION_OF_RESPONSE_TO_EXTERNAL_STIMULUS | 329 | -0.342849484 | -1.683566542 | 4.95E-06 | 0.0002358 | 0.000181641 | 2791 | tags=26%, list=18%, signal=22% | ISL1/NFKB1/C1QTNF1/CD34/DRD3/ADIPOQ/HAMP/SERPINB4/GHRL/ANGPT2/SEMA6A/SEMA3C/SEMA6C/MEFV/CARTPT/GPR17/MFHAS1/A2M/ADA/SLC12A2/KLK8/MMP28/KIAA0319/SEMA3D/SIGLEC10/MMP26/WNT3A/NLRP12/SEMA4F/FEM1A/FPR2/SEMA3B/CX3CL1/TNFRSF1B/DUSP1/PDGFB/RIN3/SEMA3A/NOD2/LEP/SEC14L1/DUSP10/METRNL/RGMA/GATA3/IGF1/CEACAM1/SPINK5/OTOP1/GHSR/TNFAIP3/IRAK3/SEMA4A/SMAD3/TRIB1/FNDC4/PLAT/CXCL13/GJA1/SIRPA/PLXNA3/NOS3/SAA1/LRFN5/TYRO3/CD9/WNT3/ARG2/SEMA4B/ADCYAP1/PLAUR/LDLR/TNFRSF1A/IL10/SERPINB2/TNFAIP6/TNR/THBD/NR1D1/SERPINB9/EDN1/THBS1/KLF4/SOCS3/CCL2/SERPINE1 |
| GOBP_REGULATION_OF_EPITHELIAL_CELL_DIFFERENTIATION | GOBP_REGULATION_OF_EPITHELIAL_CELL_DIFFERENTIATION | 128 | -0.450468156 | -1.921326295 | 4.95E-06 | 0.0002358 | 0.000181641 | 3427 | tags=42%, list=22%, signal=33% | CBFB/ZFP36L1/IL13/FOXJ1/MMP9/LHX1/WNT10B/FOXJ2/KRT84/IFNG/FOXE3/PTCH1/YAP1/WWTR1/CEBPB/SPRED1/ID1/VDR/CAV1/AQP3/HES1/SPRY1/VCL/BMP6/ATOH1/CITED1/SULT2B1/REG3G/GRHL1/SERPINB13/PLCB1/GRHL2/JAG1/SPRED2/VEGFA/GATA3/HES5/CEACAM1/GDF3/CYP27B1/SPRY2/PTCH2/IL20/S1PR2/OSR1/TNFRSF1A/IL1B/MAFF/SFN/LIF/FOXC1/ZFP36/SERPINE1/APOLD1 |
| GOBP_METAPHASE_ANAPHASE_TRANSITION_OF_CELL_CYCLE | GOBP_METAPHASE_ANAPHASE_TRANSITION_OF_CELL_CYCLE | 61 | 0.560911409 | 2.137672397 | 4.98E-06 | 0.0002358 | 0.000181641 | 4716 | tags=69%, list=30%, signal=48% | NDC80/CDK5RAP2/ANAPC7/MAD2L1/ZWINT/BUB1/GEN1/CDC23/IK/AURKB/CDT1/APC/NSMCE2/TACC3/KLHL22/TRIP13/ESPL1/MAD2L2/KNTC1/XRCC3/DYNC1LI1/RB1/ANAPC11/ANAPC5/CDC20/DLGAP5/RIOK2/BUB3/CDC6/PSMG2/CDC16/LCMT1/ATM/CENPE/ANAPC4/ZW10/CDC27/CHFR/TTK/CUL3/CDC26/MAD1L1 |
| GOBP_ESTABLISHMENT_OF_ORGANELLE_LOCALIZATION | GOBP_ESTABLISHMENT_OF_ORGANELLE_LOCALIZATION | 376 | 0.331082462 | 1.647161567 | 5.28E-06 | 0.000248237 | 0.000191222 | 3850 | tags=36%, list=25%, signal=28% | NUSAP1/NDC80/CDK5RAP2/UBXN2B/CHMP4A/FNBP1L/SPHK2/C17orf75/KLHL12/SCFD1/MREG/KIF22/MAD2L1/GOSR1/CDK5/TRIP11/WIPI1/SPAST/IL13RA2/CENPQ/TRAPPC6B/BBS4/AP3M1/AP3M2/YWHAZ/BBS2/NMD3/TRAPPC6A/MYO5C/F8/CDC23/LRRK2/CD84/DYNLT1/GOLGA2/EXOC4/CHMP5/TFG/AURKB/SEC13/DLG1/MIS12/BET1/CDT1/FYCO1/TMED10/TBC1D23/SNAPIN/NSF/CHMP6/BTK/VAMP8/XPO1/KIFC1/FAM91A1/KIF3A/CD300A/SEC24A/SEC24D/CHMP2A/SEC23A/KIFAP3/MYO6/CTSZ/KATNB1/CEP120/GOSR2/TRAPPC2/MYO5A/ACTR10/ARMCX3/MYO7A/ESPL1/CLASP2/AP3S1/ITGA4/SYK/NPM1/PSEN1/NUF2/SPIRE1/LMAN1/ACTR2/RAB3A/MLH1/KIF3B/SEC31A/PEX14/PTGDR/LLGL1/SNAP23/DYNC1H1/TMED2/MYO1D/RHOT1/CTSC/ARL6/GBF1/DLGAP5/LAMP1/RIOK2/MX1/VPS4B/SEC16B/SAR1B/LIN7A/C12orf4/SYNJ1/ARFGAP2/INCENP/PRKCZ/MCFD2/WASF1/CHMP1A/MYO5B/TRAPPC3/STARD3NL/SAR1A/ATM/TBC1D20/PAFAH1B1/MKKS/BBS5/CENPE/FEZ1/MCPH1/BECN1/SEC24C/MYO1E/STX5/PIK3CG/LGALS9/UXT/USO1/ZW10 |
| GOBP_REGULATION_OF_ALCOHOL_BIOSYNTHETIC_PROCESS | GOBP_REGULATION_OF_ALCOHOL_BIOSYNTHETIC_PROCESS | 67 | 0.547047754 | 2.110186924 | 5.53E-06 | 0.000257816 | 0.0001986 | 954 | tags=22%, list=6%, signal=21% | CYP7A1/GPAM/SQLE/HMGCS1/BMP5/MVK/FDFT1/ELOVL6/LSS/IDI1/PMVK/TM7SF2/MVD/SEC14L2/NFYB |
| GOBP_NEGATIVE_REGULATION_OF_CHEMOKINE_PRODUCTION | GOBP_NEGATIVE_REGULATION_OF_CHEMOKINE_PRODUCTION | 20 | -0.769110336 | -2.24829505 | 5.57E-06 | 0.00025812 | 0.000198834 | 494 | tags=35%, list=3%, signal=34% | SIRPA/ARG2/IL10/APOD/KLF4/EPHA2/IL6 |
| GOBP_PEROXISOMAL_TRANSPORT | GOBP_PEROXISOMAL_TRANSPORT | 67 | 0.546198359 | 2.106910463 | 5.81E-06 | 0.00026711 | 0.000205759 | 3692 | tags=51%, list=24%, signal=39% | DDO/DAO/AMACR/IDH1/PEX3/IDE/ACOT8/ACAA1/HAO1/NUDT7/PHYH/SCP2/HACL1/ZFAND6/PEX12/ABCD2/CROT/EHHADH/PEX14/ABCD3/GNPAT/TYSND1/PEX5/PAOX/PEX1/PEX7/PIPOX/PECR/HMGCL/AGPS/PEX16/ACOX2/CAT/ECH1 |
| GOCC_MICROBODY_LUMEN | GOCC_MICROBODY_LUMEN | 47 | 0.604627598 | 2.138017105 | 6.34E-06 | 0.000289594 | 0.000223079 | 3692 | tags=62%, list=24%, signal=47% | DDO/DAO/AMACR/IDH1/IDE/CRYM/ACOT8/ACAA1/HAO1/NUDT7/PHYH/FAR2/SCP2/HACL1/NUDT12/CROT/EHHADH/ABCD3/GNPAT/PRDX5/TYSND1/PAOX/PEX7/PIPOX/HMGCL/AGPS/ACOX2/CAT/ECH1 |
| GOBP_REGULATION_OF_EPITHELIAL_CELL_MIGRATION | GOBP_REGULATION_OF_EPITHELIAL_CELL_MIGRATION | 215 | -0.380989481 | -1.7782383 | 6.70E-06 | 0.000303969 | 0.000234153 | 2674 | tags=23%, list=17%, signal=20% | FGF4/SIRT1/ABL1/ANGPT2/JUP/SPRED1/MET/ANXA3/HMOX1/TGFB2/STARD13/FGF10/RAC1/TBXA2R/MAP2K3/NFE2L2/DNAJA4/PDGFB/TGFBR2/PROX1/SEMA3A/BCAR1/TGFB1/DUSP10/FOXP1/VEGFA/GATA3/INSL3/CEACAM1/SEMA4A/ATP2B4/CXCL13/NOS3/VEGFC/TAC1/ANGPT4/FGFR1/RHOB/FOXC2/HAS2/STC1/TACSTD2/EDN1/HBEGF/THBS1/KLF4/PTGS2/EPHA2/ZC3H12A/VIL1 |
| GOBP_CELL_GROWTH | GOBP_CELL_GROWTH | 421 | -0.316718255 | -1.587133709 | 6.83E-06 | 0.000307324 | 0.000236737 | 2691 | tags=24%, list=17%, signal=21% | OSTN/ULK1/SIRT1/EPB41L3/ABL1/MT3/HAMP/SIN3A/ESR2/SEMA6A/SEMA3C/DCUN1D3/SEMA6C/MAPT/RERG/MAP2/SUPV3L1/AKAP13/PRDM11/TRIM46/DBN1/TGFB2/AGTR1/RGS4/ZFYVE27/KIAA0319/IGFBP4/SEMA3D/MAP1B/SLC9A1/ADNP2/OSGIN2/VCL/TMEM108/WNT3A/SLIT3/SEMA4F/AVPR1A/ISLR2/PDLIM5/ROS1/SEMA3B/SLC44A4/CXCR4/PRKCQ/NLGN3/TGFBR2/TNN/HYAL2/DDX3X/SEMA3A/BCAR1/CPNE6/PSRC1/TGFB1/POU4F2/VEGFA/IGF1/SGK1/CEACAM1/SPHK1/C9orf72/S100A9/DCC/PI16/CRYAB/SEMA4A/FHL1/SH3BP4/FLRT3/S100A8/SMAD3/RND2/CYP27B1/GJA1/CDKN1A/PTCH2/PLXNA3/WT1/GATA4/LTBP4/CACNG7/MAG/WNT3/SCGB3A1/SEMA4B/SRF/MSX1/CDH4/SLC23A2/POU4F3/SOX17/TNR/CISH/EDN1/RGS2/SFN/HBEGF/BCL6/FAM107A/SOCS2/IGFBP1 |
| GOCC_ORGANELLAR_RIBOSOME | GOCC_ORGANELLAR_RIBOSOME | 80 | 0.516358055 | 2.084588555 | 7.19E-06 | 0.000320816 | 0.00024713 | 5655 | tags=66%, list=36%, signal=42% | MRPS10/MRPL35/C12orf65/MRPS14/NSUN3/MRPS9/MRPS28/MRPL45/MRPL19/MRPL20/MRPL33/MRPS27/MRPL40/MRPL28/MRPL30/CHCHD1/MRPS7/MRPL47/MRPL18/MRPL13/MRPS35/MRPS17/MRPL48/MRPS11/MRPL52/MRPS34/MRPL14/NSUN4/MRPL17/MRPS18A/MRPL49/MRPL41/MRPL24/DAP3/MRPL3/MRPL16/NDUFAB1/MRPL22/MRPS22/MRPL15/MRPS18B/MRPL10/MRPS36/MRPL55/MRPL42/MRPL46/MRPS5/MRPL32/MRPL43/NDUFA7/MRPL51/MRPS21/MRPS26 |
| GOBP_CELL_CYCLE_G2_M_PHASE_TRANSITION | GOBP_CELL_CYCLE_G2_M_PHASE_TRANSITION | 240 | 0.367410448 | 1.744155347 | 7.27E-06 | 0.000320816 | 0.00024713 | 3528 | tags=36%, list=23%, signal=28% | NINL/CDK5RAP2/PSMD10/BRCA1/DTL/CETN2/CEP290/CHEK1/AURKA/HMMR/TUBG1/SKP2/PSMB9/PBX1/PSMA2/BRCC3/PSMB7/DYNC1I2/PSME2/ENSA/FZR1/MTA3/PSMD14/RAD51C/AURKB/DONSON/USP47/OPTN/CEP78/PSMA4/CCNA2/SDCCAG8/NEDD1/ZFYVE19/CEP250/CCNB2/RFPL1/PSMD4/NAE1/CALM3/NEK2/CEP152/PSMD7/PSMD1/PPP1CB/RAD17/PSMA3/BRSK2/PSMD13/SKP1/CEP70/BTRC/NPM1/PPP1R12A/RBX1/PSMD11/CEP63/CEP192/MNAT1/DYNLL1/MELK/PLK4/FBXL17/DYNC1H1/SYF2/PSMA1/CHEK2/PSMB10/PSMC6/PSMB5/CENPJ/VPS4B/CLSPN/ABCB1/PRKACA/PSMC4/CDC6/ZNF830/PSMC3/LCMT1/PSME1/FOXO4/PAXIP1/ATM/PAFAH1B1/ALMS1/PSMB1 |
| GOBP_LEUKOCYTE_CHEMOTAXIS | GOBP_LEUKOCYTE_CHEMOTAXIS | 197 | -0.39410731 | -1.811692848 | 7.27E-06 | 0.000320816 | 0.00024713 | 2138 | tags=28%, list=14%, signal=25% | S1PR1/TGFB2/SLC12A2/MMP28/CCL11/CCL8/RAC1/LYST/TRPM4/CCL25/CSF1/CXCL5/PGF/FPR2/CX3CL1/CXCR4/PDE4B/DUSP1/PDGFB/AKIRIN1/CCL20/CCR7/AZU1/RIN3/NOD2/CCL3L3/MTUS1/VEGFA/CXCL6/CCL21/LBP/S100A9/PIP5K1C/S100A8/FFAR2/C10orf99/CCL26/CXCL13/CSF3R/VEGFC/SAA1/C5AR1/CCL3/CCL7/CH25H/IL10/EDN3/CALCA/CXCL2/CXCL1/EDN1/S100A12/THBS1/CCL2/SERPINE1/IL6 |
| GOBP_MACROAUTOPHAGY | GOBP_MACROAUTOPHAGY | 269 | 0.355537802 | 1.705837168 | 7.32E-06 | 0.000320888 | 0.000247185 | 4232 | tags=41%, list=27%, signal=31% | PRKAA2/UBXN2B/CHMP4A/NUPR1/PRKAB2/STBD1/SCFD1/CDK5/WIPI1/VPS41/VPS37D/STX17/ATP6V0D1/ATG5/KLHL3/EI24/MTM1/SESN3/VPS13C/LRRK2/PIP4K2B/NBR1/RRAGB/EXOC4/FYCO1/OPTN/ZFYVE1/PRKAG1/SNAPIN/ATP6V0E2/CASP3/ATG10/CHMP6/HDAC6/VAMP8/USP30/FUNDC1/ATP6V1H/MFN1/CHMP2A/ATP6V1E2/STAM2/SPTLC2/SNX5/VPS25/SNX14/FEZ2/LAMP2/MAPK8/MLST8/MAP3K7/VTA1/UVRAG/PHB2/SMG1/RHEB/ATP6V1D/MFSD8/PSEN1/UFC1/SCOC/GABARAPL2/ATP6V1B2/MAPK3/UBXN2A/DYNLL1/ATP6V1A/RNF5/PIP4K2C/SPTLC1/VPS35/VPS4B/PRKACA/SH3GLB1/RAB3GAP2/LRSAM1/ATG7/UBA5/ATG3/POLDIP2/HTRA2/ATP6V0D2/CAPN1/SESN1/DDRGK1/NEDD4/VCP/VPS33A/DCN/VPS26A/LIX1L/SNX6/SLC38A9/FEZ1/MAP1LC3A/IFT20/TOMM6/BECN1/ATP6V1C1/EXOC8/UFM1/EXOC1/NSFL1C/ATP13A2/RRAGC/CHMP2B/TMEM41B/PRKAB1/ATP6V0E1/ADPRH/CSNK2A2 |
| GOBP_DNA_REPLICATION | GOBP_DNA_REPLICATION | 237 | 0.37777639 | 1.790312344 | 7.38E-06 | 0.000321163 | 0.000247398 | 4063 | tags=39%, list=26%, signal=29% | GINS2/BCAR3/ING4/NPM2/MCM5/BRCA1/DTL/PCNA/CHEK1/ZRANB3/CHAF1A/RFC1/FAM111A/FEN1/POLE2/GMNN/POLD1/MCM6/POLB/DUT/ESCO2/MCM2/GEN1/EXD2/POLH/DONSON/CDT1/PRIM2/POLG2/CCNA2/RFC3/RNASEH2A/ID3/PRIM1/POLK/ETAA1/RRM2B/RBBP4/SMARCAL1/RRM1/RAD17/POLI/GINS3/CDC34/WDHD1/SLFN11/FAM111B/CHTF8/ENPP7/RFC5/CHAF1B/RBBP7/ZBTB38/RPA3/LIG4/NAP1L1/SAMHD1/ATRX/ESCO1/POLD2/POLA2/RECQL/CHEK2/KAT5/CINP/RMI1/GINS1/CLSPN/RFC4/CDC6/CCDC88A/ATG7/CHTF18/SENP2/ZNF830/RAD9A/DTD1/ZMPSTE24/TOP1MT/ATM/CACYBP/EME1/DSCC1/HRAS/GDF2/DDX11/POLD3/EXO1/MCM8/SSBP1/RAD9B/MCM4/FANCM |
| GOCC_SODIUM_CHANNEL_COMPLEX | GOCC_SODIUM_CHANNEL_COMPLEX | 26 | -0.693950417 | -2.169520445 | 7.56E-06 | 0.000326984 | 0.000251882 | 3398 | tags=65%, list=22%, signal=51% | SCN10A/SCNN1G/SCN2A/CACNA1I/GRIK4/SCN5A/SCN2B/CACNA1G/GRIK3/SCN3B/TRPM4/GRIK5/SCN1A/SCNN1A/SCN9A/SCN7A/SCNN1B |
| GOBP_NADH_DEHYDROGENASE_COMPLEX_ASSEMBLY | GOBP_NADH_DEHYDROGENASE_COMPLEX_ASSEMBLY | 49 | 0.574889286 | 2.078719891 | 7.62E-06 | 0.000327098 | 0.000251969 | 5623 | tags=76%, list=36%, signal=48% | NDUFAF1/NDUFA5/NDUFS4/NDUFA6/NDUFB2/NDUFB1/NDUFB4/NDUFA10/TMEM126B/NDUFA9/NDUFB6/NDUFV1/BCS1L/FOXRED1/NDUFA11/NDUFB10/NDUFC1/NDUFAB1/NDUFB3/NDUFA12/ACAD9/NDUFB5/NDUFS2/OXA1L/NDUFA1/NDUFS5/NDUFS8/NDUFS7/ECSIT/NDUFB11/TMEM126A/NDUFA8/NDUFA2/NDUFV2/NDUFA7/NDUFC2/NDUFB7 |
| GOBP_SODIUM_ION_TRANSMEMBRANE_TRANSPORT | GOBP_SODIUM_ION_TRANSMEMBRANE_TRANSPORT | 159 | -0.411064593 | -1.831293749 | 7.79E-06 | 0.000332154 | 0.000255864 | 3398 | tags=39%, list=22%, signal=31% | SCN10A/SCNN1G/SLC5A2/SLC4A5/ATP1B1/FXYD6/SCN2A/HCN2/ATP1A1/SLC20A2/DRD3/CACNA1I/SCN5A/WNK4/PTPN3/SLC6A20/WNK2/SCN2B/ATP1B3/HECW2/SLC12A2/CACNA1G/SLC24A3/SLC6A4/SLC9A4/SLC9A1/SLC6A6/SCN3B/TRPM4/ATP4A/SLC34A3/SLC9A3R1/SLC6A16/FXYD5/SLC20A1/SLC6A17/SLC8A3/SLC9A8/SLC4A7/SLC6A18/NETO2/SCN1A/SLC3A2/TPCN1/ATP1B2/SCNN1A/SLC6A11/SCN9A/ATP1A2/SLC24A4/SLC24A2/ATP2B4/NOS1/SLC4A8/SLC5A1/SCN7A/HCN4/OSR1/FGF14/SLC8A2/SCNN1B/KCNK1 |
| GOBP_MITOCHONDRIAL_TRANSLATIONAL_TERMINATION | GOBP_MITOCHONDRIAL_TRANSLATIONAL_TERMINATION | 84 | 0.509015058 | 2.08438033 | 7.89E-06 | 0.000334265 | 0.00025749 | 5655 | tags=64%, list=36%, signal=41% | GFM2/MRPS10/MRPL35/MTRF1/MRPS14/MRPS9/MRPL1/MRPS28/MRPL45/MRPL19/MRPL20/MRPL33/MRPS27/MRPL40/MRPL28/MRPL30/CHCHD1/MRPS7/MRPL47/MRPL18/MRPL13/MRPS35/MRPS17/MRPS23/MRPL48/MRPS11/MRPL52/MRPS34/MRPL14/MRPL17/MRPS18A/MRPL49/MRPL41/MRPL24/DAP3/MRPL3/MRPL16/MRPL22/MRPS22/MRPL15/OXA1L/MRPS18B/MRPL10/MRPS36/MRRF/MRPL55/MRPL42/MRPL46/MRPS5/MRPL32/MRPL43/MRPL51/MRPS21/MRPS26 |
| GOBP_SCF_DEPENDENT_PROTEASOMAL_UBIQUITIN_DEPENDENT_PROTEIN_CATABOLIC_PROCESS | GOBP_SCF_DEPENDENT_PROTEASOMAL_UBIQUITIN_DEPENDENT_PROTEIN_CATABOLIC_PROCESS | 89 | 0.501136414 | 2.083200346 | 8.95E-06 | 0.000376745 | 0.000290213 | 4224 | tags=51%, list=27%, signal=37% | PSMD10/FBXO27/FBXO2/SKP2/PSMB9/PSMA2/CCNF/FBXO48/PSMB7/PSME2/PSMD14/FBXO6/PSMA4/PSMD4/PSMD7/PSMD1/PSMA3/CUL5/PSMD13/SKP1/BTRC/RBX1/PSMD11/AMN1/FBXL4/FBXL5/FBXL17/PSMA1/PSMB10/PSMC6/PSMB5/PSMC4/PSMC3/FBXO4/FBXW5/PSME1/PSMB1/PSMD2/FBXO38/FBXO17/PSMA5/FBXW7/FBXL18/PSMC5/CUL1 |
| GOBP_REGULATION_OF_RESPONSE_TO_WOUNDING | GOBP_REGULATION_OF_RESPONSE_TO_WOUNDING | 145 | -0.427486679 | -1.862040378 | 9.11E-06 | 0.000381037 | 0.000293519 | 2076 | tags=33%, list=13%, signal=29% | SMOC2/MYOZ1/PTPRS/FGG/CLDN19/SERPING1/DUOX1/FGA/ALOX5/NDEL1/FOXA2/STK24/C1QTNF1/CD34/CAV1/SLC12A2/KLK8/KIAA0319/SIGLEC10/TBXA2R/NFE2L2/REG3G/CXCR4/PDGFB/SCARF1/F3/RGMA/INSL3/CEACAM1/TNFAIP3/SMAD3/PLAT/GJA1/NOS3/CD9/FOXC2/PLAUR/IL10/TNFRSF12A/SERPINB2/TNR/THBD/EDN1/HBEGF/THBS1/KLF4/SERPINE1/VIL1 |
| GOBP_ORGANIC_HYDROXY_COMPOUND_BIOSYNTHETIC_PROCESS | GOBP_ORGANIC_HYDROXY_COMPOUND_BIOSYNTHETIC_PROCESS | 228 | 0.367767197 | 1.729790611 | 9.21E-06 | 0.000382901 | 0.000294955 | 2920 | tags=29%, list=19%, signal=24% | CYP7A1/GPAM/SQLE/SPTLC3/WNT5A/PRKAA2/HMGCS1/CYB5R2/SPHK2/BMP5/DHDDS/DAO/MVK/AMACR/FDFT1/ELOVL6/STARD4/CYP39A1/IP6K3/LSS/IDI1/PMVK/QDPR/TM7SF2/MVD/SEC14L2/DDC/CFTR/DHFR/IP6K2/NFYB/NSDHL/ACOT8/CYB5R1/CLCN2/SRD5A2/SPR/AKR1B1/EBP/PCBD2/ARV1/SPTLC2/SCP2/APOA5/CYP51A1/CYP2R1/HMGCR/GIPC1/AKR1D1/OSBPL2/HSD17B10/HAND2/NR1H4/CD244/FASN/SCD/ITPKA/INSIG2/CTNS/APPL1/DHCR7/NFYA/SNAI2/SREBF2/SPTLC1/ACAT2/PARK7 |
| GOBP_STEROID_METABOLIC_PROCESS | GOBP_STEROID_METABOLIC_PROCESS | 288 | 0.344172521 | 1.654208757 | 9.36E-06 | 0.000386751 | 0.000297921 | 2912 | tags=28%, list=19%, signal=24% | CYP7A1/GPAM/SPP1/SQLE/PRKAA2/CEBPA/HMGCS1/CYB5R2/BMP5/CYP11A1/UGT2B11/MVK/AMACR/FDFT1/ELOVL6/DHRS9/STARD4/CYP39A1/SULT1E1/LSS/SDR42E1/IDI1/PCSK9/ATP8B1/UGT2B15/PMVK/TM7SF2/MVD/PBX1/NR1I2/DHRS11/SEC14L2/CFTR/NFYB/SULT2A1/ACADL/NSDHL/HSD11B1/UGT2B4/RORC/ANGPTL3/ACOT8/ACAA1/CYB5R1/CLCN2/SRD5A2/LIPA/AKR1B1/RDH16/STUB1/CYP26A1/EBP/ARV1/SCP2/APOA5/CYP51A1/SULT1B1/CYP2R1/UGT2B7/HMGCR/SGPL1/HSD17B8/AKR1D1/CYP3A7/OSBPL2/VLDLR/ESR1/HSD17B10/PANK2/RDH5/NR1H4/FASN/SCD/CLN6/MED1/INSIG2/FDX1/DHCR7/NFYA/SNAI2/SREBF2/ACAT2 |
| GOBP_ANTIGEN_PROCESSING_AND_PRESENTATION_OF_EXOGENOUS_PEPTIDE_ANTIGEN_VIA_MHC_CLASS_I | GOBP_ANTIGEN_PROCESSING_AND_PRESENTATION_OF_EXOGENOUS_PEPTIDE_ANTIGEN_VIA_MHC_CLASS_I | 76 | 0.500132479 | 1.986845809 | 1.03E-05 | 0.000420807 | 0.000324155 | 4585 | tags=59%, list=29%, signal=42% | PSMD10/PSMB9/PSMA2/PSMB7/PSME2/CD36/PSMD14/PSMA4/PSMD4/VAMP8/VAMP3/IKBKB/PSMD7/PSMD1/PDIA3/HLA-F/PSMA3/TAP2/PSMD13/CLEC4A/PSMD11/TAPBP/SNAP23/PSMA1/PSMB10/PSMC6/PSMB5/CALR/HLA-A/PSMC4/B2M/PSMC3/PSME1/PSMB1/PSMD2/ITGAV/MFSD6/NCF2/PSMA5/HLA-B/IFI30/PSMC5/PSMB8/CYBB/PSMB4 |
| GOBP_NUCLEOTIDE_EXCISION_REPAIR_DNA_INCISION | GOBP_NUCLEOTIDE_EXCISION_REPAIR_DNA_INCISION | 37 | 0.620354455 | 2.105150508 | 1.04E-05 | 0.000422698 | 0.000325611 | 4190 | tags=59%, list=27%, signal=44% | XPA/PCNA/RFC1/POLD1/OGG1/GTF2H5/RFC3/POLK/GTF2H3/DDB2/RBX1/RFC5/RPA3/POLD2/RFC4/NTHL1/ERCC4/POLD3/CHD1L/RPS27A/ERCC3/RPA1 |
| GOBP_REGULATION_OF_CELL_DEVELOPMENT | GOBP_REGULATION_OF_CELL_DEVELOPMENT | 438 | -0.313516913 | -1.581798135 | 1.05E-05 | 0.000424318 | 0.00032686 | 3085 | tags=27%, list=20%, signal=23% | HELT/L1CAM/FGA/ETV5/SKI/CLDN18/IFNG/MYOC/TNFSF11/NDEL1/TLX2/YAP1/DRD3/ASPA/ZNF335/NPPC/ADIPOQ/TRIM11/ABL1/MT3/PTPRZ1/RELA/HAP1/SEMA6A/SEMA3C/DIO3/SEMA6C/MAPT/SOX8/VAX1/HEY1/OMG/NOG/SMARCD3/ID1/MAP2/HOXA11/PLXNA2/TRIM46/DBN1/RGS14/SLITRK1/SHANK3/HES1/NPTN/CCL11/GLI3/ZFYVE27/KIAA0319/SEMA3D/MAP1B/NFATC4/EEF2K/KALRN/ZNF365/DLL3/RAC1/VCL/WNT3A/SEMA4F/ISLR2/SEMA3B/CX3CL1/TTBK1/TNFRSF1B/ARHGDIA/CXCR4/NKX2-2/LRP2/PTPRD/PLCB1/HES2/SEMA3A/DCT/PDE3A/CUX2/BMP2/TGFB1/POU4F2/NTRK2/DUSP10/EFNA5/VEGFA/IGF1/HES5/OTP/DAAM2/FBLN1/DCC/SEMA4A/GPR37L1/TRIB1/POU4F1/NEDD9/RND2/PER2/PLXNA3/MYADM/VEGFC/SOX11/MAG/S1PR2/WNT3/CASS4/SEMA4B/ADCYAP1/SRF/LDLR/TNFRSF1A/CDH4/HAS2/LRP4/IL1B/TNR/TACSTD2/NR1D1/LIF/SPRY4/CLCF1/IL6 |
| GOBP_AXON_DEVELOPMENT | GOBP_AXON_DEVELOPMENT | 480 | -0.309710204 | -1.572110484 | 1.05E-05 | 0.000424318 | 0.00032686 | 3993 | tags=35%, list=26%, signal=27% | TIAM2/CRMP1/DLX5/SLITRK5/CRABP2/LMX1A/S100B/VASH2/MAP1A/DRD2/FSTL4/GDI1/NR2E1/YTHDF1/NRXN3/GDNF/OLFM1/CCK/CNP/EPHB4/SEMA3E/BOC/LAMA5/BARHL2/DSCAML1/MAP1S/LHX3/EPHA10/PDLIM7/PTPRS/GAP43/GBX2/NRXN1/TIAM1/SLIT1/EFNA1/JAM3/CNTN2/GAB2/EGR2/LHX1/L1CAM/SIPA1L1/MAPK8IP3/EPHA8/CHRNB2/SHC3/NDEL1/DCLK1/FGF8/PTCH1/NTRK1/STK24/ISL1/ATP8A2/PALLD/ACTB/ULK1/SLITRK4/ABL1/MT3/SPRY3/SIN3A/SEMA6A/SEMA3C/NKX2-1/SEMA6C/MAPT/VAX1/LMTK2/OMG/NOG/SPTBN1/TNFRSF21/NCAM1/MAP2/CCKAR/ARTN/RPS6KA5/ARX/PLXNA2/TRIM46/DBN1/SLITRK1/SHANK3/KLK8/NPTN/GLI3/ZFYVE27/KIAA0319/MYPN/RNF165/KEL/SEMA3D/MAP1B/LHX9/SPTBN4/KALRN/TSPAN2/RAC1/TRIO/VCL/WNT3A/SLIT3/SEMA4F/ISLR2/ATOH1/ACTBL2/SEMA3B/EFNB2/ARHGDIA/PLP1/CXCR4/PRKCQ/POU3F2/GBX1/NTN5/NLGN3/LAMA1/OR10A4/EPHB1/TUBB2B/SCARF1/NPTX1/TNN/SEMA3A/TUBB3/TSKU/B4GALT5/POU4F2/NTRK2/BRSK1/RGMA/EFNA5/VEGFA/GATA3/KIF5A/UNC5D/C9orf72/UST/DCC/SEMA4A/CHL1/FLRT3/PHOX2B/POU4F1/RND2/SLITRK2/NOTCH3/LAMC2/PLXNA3/GFRA3/RAP1GAP/PLA2G10/ZSWIM4/MAG/WNT3/SEMA4B/SRF/CDH4/IRS2/POU4F3/LRP4/TNR/APOD/KLF4/NR4A2/EPHA2/SLITRK3 |
| GOBP_GLIOGENESIS | GOBP_GLIOGENESIS | 260 | -0.360054078 | -1.71208554 | 1.07E-05 | 0.00043015 | 0.000331352 | 3371 | tags=35%, list=22%, signal=28% | GAP43/PITX3/AKT1/TIAM1/MOBP/ADAM22/EGR2/AGER/ETV5/EGFR/SKI/IFNG/MYOC/ZNF488/SOX2/DRD3/ASPA/CNTNAP1/CSPG4/ABL1/MT3/PTPRZ1/RELA/NKX2-1/P2RY1/MAPT/SOX8/GPR17/NOG/TNFRSF21/TGFB2/SOX1/ZMIZ1/HES1/LGI4/GLI3/WDR1/FGF10/ITGB4/ZNF365/TSPAN2/FGF5/STAT3/CSF1/IFNGR1/FPR2/CX3CL1/TTBK1/TNFRSF1B/PLP1/CXCR4/NKX2-2/LRP2/POU3F2/AZU1/SLC8A3/GCM1/CHRM1/B4GALT5/BMP2/ATP1B2/TGFB1/FA2H/NTRK2/DUSP10/HES5/DAAM2/S100A9/PENK/PRDM8/S100A8/GPR37L1/PHOX2B/LEPR/CSK/C5AR1/CCL3/DTX1/SOX11/MAG/CD9/ADCYAP1/LDLR/LPAR1/IL1B/NR1D1/LIF/CLCF1/CCL2/IL6 |
| GOBP_RETROGRADE_VESICLE_MEDIATED_TRANSPORT_GOLGI_TO_ENDOPLASMIC_RETICULUM | GOBP_RETROGRADE_VESICLE_MEDIATED_TRANSPORT_GOLGI_TO_ENDOPLASMIC_RETICULUM | 80 | 0.508227567 | 2.051764971 | 1.09E-05 | 0.000433333 | 0.000333804 | 4833 | tags=57%, list=31%, signal=40% | KDELR3/COG4/SCFD1/KIF22/STX18/GOLPH3L/RACGAP1/COPZ1/TMED10/NSF/KIF3A/RAB33B/NBAS/LMAN2/KIFAP3/COPB2/UVRAG/COPZ2/USE1/KIF3B/ERGIC3/DNAJC28/KIF11/TAPBP/RER1/TMED2/ATP9A/GBF1/ARF3/ERGIC2/ARFGAP2/COPB1/ARF4/KDELR2/CENPE/COG3/ZW10/RINT1/KIF2A/KIF2C/RAB1A/KLC1/BET1L/TMED9/PITPNB/SURF4 |
| GOBP_REGULATION_OF_POSTSYNAPTIC_MEMBRANE_POTENTIAL | GOBP_REGULATION_OF_POSTSYNAPTIC_MEMBRANE_POTENTIAL | 132 | -0.438972035 | -1.895871547 | 1.10E-05 | 0.000434129 | 0.000334417 | 3936 | tags=48%, list=25%, signal=36% | GRIN2C/DLG4/CHRNA5/RIMS1/DRD4/NPAS4/DRD2/RIMS2/CHRNG/GRIN1/GABBR1/CHRNB4/AKT1/GABRR2/NRXN1/CHRNA7/GABRG3/CHRNB2/CHRNA9/NTSR1/GRIN2D/CHRNA3/SHANK1/DMPK/GLRA3/IGSF11/GHRL/CHRNA4/GRIK4/STX1B/CHRNA6/STX1A/CBLN1/SHANK3/GABRA5/RGS4/GRIK3/TMEM108/GLRA1/GRIK5/GABRB2/NLGN3/SLC8A3/CHRM1/GRID1/GLRA2/CUX2/ADRB1/GABRR1/KCNA1/MPP2/TMEM25/SEZ6/NLGN1/GABRA2/CHRNA10/ADRB2/S1PR2/GABRB1/ADCYAP1/P2RX1/FGF14/SLC8A2 |
| GOBP_CAMERA_TYPE_EYE_DEVELOPMENT | GOBP_CAMERA_TYPE_EYE_DEVELOPMENT | 295 | -0.346539899 | -1.681513072 | 1.14E-05 | 0.000448666 | 0.000345615 | 4213 | tags=40%, list=27%, signal=30% | CHD7/SPRED3/CRYBA4/NHS/LCTL/ALDH1A2/DLL1/SLC1A1/WNT9A/SLC6A3/KERA/SLC17A8/PROM1/ATP2B1/DRD2/NR2E1/FOXL2/PAX6/GRHL3/MAB21L1/USH1C/NES/PITX2/NAGLU/RHO/PITX3/CRYGA/SLC4A5/COL4A1/PPP1R13L/VSX1/FKBP8/CABP4/LHX1/GJA8/JMJD6/KRT12/SKI/ATF4/FOXE3/MTNR1B/ATP8A2/RPE65/SIX3/FBN2/SPRED1/DIO3/PDE6A/SOX8/VAX1/OPN4/TFAP2A/SMARCD3/FZD5/RDH13/SDK1/NEUROD4/TMEM231/TH/TGFB2/SOX1/CRYBB3/WNT7B/RAX/GLI3/RP1L1/FGF10/CRYBA1/TTLL5/SPRY1/BIRC7/COL8A1/PHACTR4/CRYGD/SDK2/NR2E3/PTF1A/TGFBR2/PROX1/LAMA1/TGIF2/TFAP2B/GRHL2/HIPK2/UNC45B/CRYGB/TSKU/NDP/JAG1/POU4F2/NTRK2/SPRED2/VEGFA/GATA3/HES5/RP1/LRP5/CRYAB/CYP1A1/ROM1/SMAD3/ATP2B4/TMOD1/ALDH1A3/SPRY2/GNAT1/HPCA/WT1/SLC25A25/MEGF11/SOX11/FJX1/FOXC2/SRF/ACVR2B/KLF4/MYOM1/FOXC1/EPHA2 |
| GOBP_POSITIVE_REGULATION_OF_SMOOTH_MUSCLE_CELL_PROLIFERATION | GOBP_POSITIVE_REGULATION_OF_SMOOTH_MUSCLE_CELL_PROLIFERATION | 78 | -0.507530352 | -1.990303492 | 1.15E-05 | 0.000448666 | 0.000345615 | 1531 | tags=28%, list=10%, signal=26% | CX3CL1/NOX1/PDGFB/TGFBR2/MMP2/TGM2/FOXP1/IGF1/HES5/CDH13/GJA1/FGF9/NR4A3/IL10/JUN/ERN1/PPARGC1A/EDN1/HBEGF/THBS1/ADAMTS1/IL6 |
| GOMF_OXIDOREDUCTASE_ACTIVITY_ACTING_ON_NAD_P_H_QUINONE_OR_SIMILAR_COMPOUND_AS_ACCEPTOR | GOMF_OXIDOREDUCTASE_ACTIVITY_ACTING_ON_NAD_P_H_QUINONE_OR_SIMILAR_COMPOUND_AS_ACCEPTOR | 50 | 0.577766229 | 2.092748366 | 1.22E-05 | 0.000474611 | 0.000365601 | 5623 | tags=78%, list=36%, signal=50% | TP53I3/NDUFA5/NDUFS4/NDUFA6/NQO2/NDUFB2/NDUFB1/AIFM2/NDUFB4/CRYZ/NDUFA10/CRYZL1/NDUFA9/NDUFB6/NDUFV1/CBR4/NQO1/NDUFB10/NDUFC1/NDUFAB1/NDUFB3/NDUFA12/AKR1C3/CBR1/NDUFB5/NDUFS2/NDUFA1/AKR1C4/AKR1C1/NDUFS5/NDUFS8/NDUFS7/ADH4/NDUFA8/NDUFA2/NDUFV2/NDUFA7/NDUFC2/NDUFB7 |
| GOBP_ERK1_AND_ERK2_CASCADE | GOBP_ERK1_AND_ERK2_CASCADE | 277 | -0.353772462 | -1.701586737 | 1.25E-05 | 0.00048062 | 0.00037023 | 3213 | tags=32%, list=21%, signal=26% | CCL24/AGER/RIPK2/CHRNA7/FGA/EGFR/OXTR/CHRNA9/CCL23/TNFSF11/CCL22/FGF8/NTRK1/FGF4/DUSP26/ADIPOQ/ABL1/MT3/SPRY3/PLA2G5/BRAF/SEMA6A/SPRED1/P2RY1/PKHD1/MFHAS1/WNK2/RGS14/NPTN/CCL11/FGF10/PTPN1/CRYBA1/CCL8/PDGFC/SPRY1/CCL25/SLC9A3R1/ROS1/FPR2/LMO3/CX3CL1/DUSP1/PDGFB/CCL20/CCR7/EPHB1/DUSP9/PSCA/NOD2/TIMP3/TPBG/BMP2/TGFB1/CCL3L3/SPRED2/DUSP10/IGF1/RAPGEF1/CCL21/CEACAM1/FBLN1/ZFP36L2/CCL26/THPO/EPO/CHRNA10/SPRY2/PLA2G2A/SIRPA/C1QL4/GATA4/CSK/DNAJC27/C5AR1/CCL3/ATF3/CCL7/ICAM1/AKAP12/ADCYAP1/DUSP6/TNFAIP8L3/IL1B/LIF/SPRY4/KLF4/CCL2/EPHA2/MYC |
| GOBP_RESPONSE_TO_MECHANICAL_STIMULUS | GOBP_RESPONSE_TO_MECHANICAL_STIMULUS | 186 | -0.394151056 | -1.804016438 | 1.25E-05 | 0.00048107 | 0.000370576 | 3017 | tags=33%, list=19%, signal=27% | EGFR/ATP1A1/JUND/CHRNA9/PTCH1/NTRK1/NFKB1/ATP8A2/KCNK4/RELA/ANGPT2/JUP/P2RY1/NFKBIA/RYR2/PKD1L3/RETN/SHANK3/KIAA0319/TRPA1/MAP1B/SLC9A1/BAG3/RAC1/SLC38A2/PKD1L2/PDZD7/BMP6/CSRP3/CNN2/CXCR4/TGFBR2/PKD1L1/SCN1A/HABP4/KCNA1/GOT1/ATP1A2/TNFRSF10B/IRF1/STRC/KCNA5/LTBR/BTG2/TNFRSF8/CHRNA10/GJA1/GATA4/LHFPL5/TNFSF14/MAG/TNFRSF1A/JUN/GDF5/MAP3K14/IL1B/EDN1/THBS1/IGFBP2/FOSL1/FOS/FOSB |
| GOBP_REGULATION_OF_WOUND_HEALING | GOBP_REGULATION_OF_WOUND_HEALING | 116 | -0.442886614 | -1.868498419 | 1.28E-05 | 0.00048632 | 0.000374621 | 1708 | tags=21%, list=11%, signal=19% | TBXA2R/NFE2L2/REG3G/CXCR4/PDGFB/F3/INSL3/CEACAM1/TNFAIP3/SMAD3/PLAT/GJA1/NOS3/CD9/FOXC2/PLAUR/TNFRSF12A/SERPINB2/THBD/EDN1/HBEGF/THBS1/SERPINE1/VIL1 |
| GOBP_NEGATIVE_REGULATION_OF_CELL_DEVELOPMENT | GOBP_NEGATIVE_REGULATION_OF_CELL_DEVELOPMENT | 156 | -0.419883783 | -1.859047074 | 1.32E-05 | 0.000499156 | 0.000384508 | 2797 | tags=32%, list=18%, signal=27% | TLX2/DRD3/NPPC/TRIM11/MT3/SEMA6A/SEMA3C/DIO3/SEMA6C/VAX1/OMG/NOG/ID1/MAP2/TRIM46/HES1/CCL11/KIAA0319/SEMA3D/NFATC4/DLL3/WNT3A/SEMA4F/SEMA3B/ARHGDIA/SEMA3A/DUSP10/EFNA5/VEGFA/IGF1/HES5/DAAM2/FBLN1/DCC/SEMA4A/GPR37L1/PLXNA3/SOX11/MAG/WNT3/SEMA4B/ADCYAP1/LDLR/LRP4/IL1B/TNR/TACSTD2/NR1D1/SPRY4/IL6 |
| GOBP_LYMPHANGIOGENESIS | GOBP_LYMPHANGIOGENESIS | 17 | -0.78633031 | -2.154831686 | 1.36E-05 | 0.000511072 | 0.000393688 | 1358 | tags=41%, list=9%, signal=38% | PROX1/PDPN/VEGFC/FOXC2/ACVR2B/FOXC1/EPHA2 |
| GOBP_NEGATIVE_REGULATION_OF_ERK1_AND_ERK2_CASCADE | GOBP_NEGATIVE_REGULATION_OF_ERK1_AND_ERK2_CASCADE | 68 | -0.521145159 | -1.997583048 | 1.36E-05 | 0.000511072 | 0.000393688 | 2641 | tags=46%, list=17%, signal=38% | DUSP26/ADIPOQ/ABL1/SPRY3/SEMA6A/SPRED1/WNK2/RGS14/PTPN1/CRYBA1/SPRY1/SLC9A3R1/LMO3/DUSP1/DUSP9/PSCA/TIMP3/SPRED2/DUSP10/RAPGEF1/FBLN1/CHRNA10/SPRY2/SIRPA/C1QL4/CSK/ATF3/DUSP6/LIF/SPRY4/KLF4 |
| GOBP_TRANSLATIONAL_ELONGATION | GOBP_TRANSLATIONAL_ELONGATION | 116 | 0.440555337 | 1.902509755 | 1.40E-05 | 0.000520467 | 0.000400925 | 5655 | tags=58%, list=36%, signal=37% | EEF1A2/DPH5/DNAJC24/MRPS10/MRPL35/MRPS14/MRPS9/MRPL1/MRPS28/DPH3/MRPL45/MRPL19/CPEB2/MRPL20/MRPL33/MRPS27/MRPL40/MRPL28/MRPL30/CHCHD1/TRNAU1AP/MRPS7/MRPL47/MRPL18/MRPL13/MRPS35/MRPS17/MRPS23/MRPL48/MRPS11/MRPL52/MRPS34/TSFM/MRPL14/SRP9/MRPL17/MRPS18A/MRPL49/MRPL41/EEF1B2/MRPL24/DAP3/MRPL3/MRPL16/MRPL22/MRPS22/MRPL15/EEF1G/EEFSEC/OXA1L/SEPSECS/MRPS18B/MRPL10/SECISBP2/MRPS36/MRPL55/MRPL42/ZNF598/USP16/MRPL46/ABTB1/MRPS5/MRPL32/MRPL43/MRPL51/MRPS21/MRPS26 |
| GOBP_VESICLE_LOCALIZATION | GOBP_VESICLE_LOCALIZATION | 198 | 0.37948036 | 1.763376409 | 1.40E-05 | 0.000520467 | 0.000400925 | 3986 | tags=41%, list=26%, signal=31% | FNBP1L/C17orf75/KLHL12/SCFD1/MREG/GOSR1/CDK5/TRIP11/WIPI1/TRAPPC6B/BBS4/AP3M1/AP3M2/BBS2/TRAPPC6A/MYO5C/F8/LRRK2/GOLGA2/EXOC4/TFG/SEC13/BET1/FYCO1/TMED10/TBC1D23/SNAPIN/NSF/FAM91A1/KIF3A/SEC24A/SEC24D/SEC23A/KIFAP3/MYO6/CTSZ/GOSR2/TRAPPC2/MYO5A/BRSK2/MYO7A/CLASP2/AP3S1/ITGA4/PSEN1/LMAN1/RAB3A/KIF3B/SEC31A/SNAP23/DYNC1H1/TMED2/MYO1D/CTSC/ARL6/GBF1/PTEN/MX1/SEC16B/SAR1B/LIN7A/SYNJ1/ARFGAP2/PRKCZ/MCFD2/MYO5B/TRAPPC3/STARD3NL/SAR1A/TBC1D20/PAFAH1B1/MKKS/BBS5/VPS33A/SEC24C/MYO1E/STX5/PIK3CG/USO1/TRAPPC2L/YKT6/AP3B1 |
| GOBP_POSITIVE_REGULATION_OF_LOCOMOTION | GOBP_POSITIVE_REGULATION_OF_LOCOMOTION | 493 | -0.30458161 | -1.547532453 | 1.41E-05 | 0.000520467 | 0.000400925 | 1691 | tags=26%, list=11%, signal=24% | AGER/MMP9/TACR1/SASH1/FBXO5/DUOX1/FGR/EGFR/IL4/NTF3/FGFBP1/IFNG/MYOC/SYDE1/SOD2/ACVR1B/ZNF609/TAC4/INSR/JAM2/BVES/SIRT1/FAM89B/ABL1/MSTN/IL12A/SEMA6A/SEMA3C/SEMA6C/ACVR1/ITGAX/MET/ANXA3/CAV1/PLVAP/ARTN/HMOX1/S1PR1/CEACAM6/TGFB2/CCL11/FGF10/SEMA3D/CCL8/PDGFC/RAC1/STAT3/CSF1/SEMA4F/MAP2K3/NFE2L2/PGF/FPR2/SEMA3B/CX3CL1/PLP1/CXCR4/PDGFB/AKIRIN1/TGFBR2/PROX1/CCL20/CCR7/AZU1/RHOD/SEMA3A/BCAR1/PDPN/F3/NTRK3/TPBG/BMP2/TGFB1/MADCAM1/FOXP1/VEGFA/GATA3/IGF1/INSL3/CCL21/LBP/PRDM14/SPHK1/FAM110C/CDH13/SEMA4A/PODXL/SMAD3/CCL26/NEDD9/CXCL13/SPRY2/CD274/LAMC2/FGF9/MYADM/NOS3/VEGFC/TAC1/C5AR1/CCL3/ANGPT4/CCL7/ICAM1/FGFR1/NR4A3/AKAP12/RHOB/FOXC2/CASS4/SEMA4B/TNFAIP6/EDN3/IRS2/HAS2/LPAR1/MCAM/IL1B/EDN1/HBEGF/THBS1/PTGS2/SERPINE1/FAM107A/ADAMTS1/ZC3H12A/VIL1/IL6 |
| GOBP_TRANSLATIONAL_TERMINATION | GOBP_TRANSLATIONAL_TERMINATION | 97 | 0.476164783 | 1.991918685 | 1.53E-05 | 0.000561042 | 0.00043218 | 5693 | tags=61%, list=37%, signal=39% | GFM2/MRPS10/MRPL35/MTRF1/C12orf65/MRPS14/MRPS9/MRPL1/MRPS28/MRPL45/MRPL19/MRPL20/MRPL33/MRPS27/MRPL40/MRPL28/APEH/MRPL30/N6AMT1/CHCHD1/MRPS7/MRPL47/MRPL18/MRPL13/MRPS35/MRPS17/MRPS23/MRPL48/MRPS11/MRPL52/MRPS34/MRPL14/MRPL17/MRPS18A/MRPL49/MRPL41/MRPL24/DAP3/MRPL3/MRPL16/MRPL22/MRPS22/MRPL15/OXA1L/MRPS18B/MRPL10/MRPS36/MRRF/GLE1/MRPL55/MRPL42/MRPL46/MRPS5/MRPL32/MRPL43/MRPL51/MRPS21/MRPS26/GSPT2 |
| GOBP_DEFENSE_RESPONSE_TO_BACTERIUM | GOBP_DEFENSE_RESPONSE_TO_BACTERIUM | 226 | -0.3775852 | -1.770622575 | 1.63E-05 | 0.000592996 | 0.000456795 | 3166 | tags=34%, list=20%, signal=28% | RIPK2/DEFB116/PI3/FGR/FGA/DEFB135/DEFB108B/GALP/SEH1L/STATH/LPO/IL17F/COCH/STAB1/GSDMC/HAMP/CEBPB/WFDC2/COLEC12/IL12A/DEFB103A/ANXA3/DEFB110/WFDC12/SEMG2/WFDC3/WFDC10B/DEFB127/PGC/DEFB125/IL23R/IRF8/LYST/PGLYRP3/WFDC9/CST11/KLK3/FPR2/PRB3/REG3G/KLK7/CEBPE/CCL20/AZU1/RNASE8/LCN2/NOD2/DEFB119/DEFB123/KRT6A/FOXP1/CXCL6/DEFB106B/LBP/SPINK5/S100A9/PRG2/CRP/S100A8/C10orf99/CXCL13/LYG2/RAG2/PLA2G2A/C5AR1/ARG2/SLC11A1/TNFRSF1A/LALBA/DEFB126/IL10/DEFB118/S100A12/BCL3/SERPINE1/EPHA2/IL6 |
| GOBP_METANEPHROS_DEVELOPMENT | GOBP_METANEPHROS_DEVELOPMENT | 82 | -0.49192433 | -1.948773791 | 1.64E-05 | 0.000592996 | 0.000456795 | 3211 | tags=41%, list=21%, signal=33% | FOXJ1/POU3F3/LHX1/TCF21/FGF8/PTCH1/YAP1/CD34/WWTR1/ADIPOQ/SOX8/HOXA11/FRAS1/WNT7B/HES1/GLI3/FGF10/SPRY1/CITED1/NKX3-1/PDGFB/SIX4/TFAP2B/GATA3/HES5/IRX2/WT1/FOXC2/OSR1/IRX3/SOX17/LIF/MYC/EGR1 |
| GOBP_ENDOTHELIUM_DEVELOPMENT | GOBP_ENDOTHELIUM_DEVELOPMENT | 119 | -0.445961512 | -1.883081094 | 1.76E-05 | 0.000632568 | 0.000487278 | 2434 | tags=31%, list=16%, signal=26% | ACVR1/HEY1/ITGAX/ID1/MET/S1PR1/WNT7B/STARD13/VCL/BMP6/CXCR4/PROX1/PLCB1/COL15A1/PDPN/JAG1/GSTM3/FOXP1/VEGFA/GJA4/RAPGEF1/CEACAM1/PDE4D/GJA1/HOXA13/KDM6B/MYADM/ICAM1/S1PR2/RHOB/FOXC2/TNFRSF1A/ACVR2B/STC1/IL1B/SOX17/APOLD1 |
| GOCC_SMALL_RIBOSOMAL_SUBUNIT | GOCC_SMALL_RIBOSOMAL_SUBUNIT | 67 | 0.529779694 | 2.043576957 | 1.83E-05 | 0.000657168 | 0.000506228 | 4477 | tags=54%, list=29%, signal=38% | RPS4Y1/ISG15/HBA2/RPS21/MRPS10/MCTS1/MRPS14/MRPS9/RPS26/MRPS28/RPSA/RPS7/MRPS27/RPS23/RPS29/MRPS7/RPS3A/MRPS35/MRPS17/MRPS11/MRPS34/RPS2/MRPS18A/DAP3/RPS15A/DHX29/RPS27A/RPS27L/RPS3/RPS9/MRPS22/LARP4/RPS24/RPS12/MRPS18B/RPS8 |
| GOBP_SENSORY_SYSTEM_DEVELOPMENT | GOBP_SENSORY_SYSTEM_DEVELOPMENT | 350 | -0.328839204 | -1.615576357 | 2.00E-05 | 0.000710796 | 0.000547538 | 4213 | tags=39%, list=27%, signal=29% | CHD7/SPRED3/CRYBA4/NHS/LCTL/ALDH1A2/DLL1/SLC1A1/MEIS3/WNT9A/SLC6A3/KERA/SLC17A8/PROM1/ATP2B1/ADAMTS18/DRD2/NR2E1/FOXL2/SCO2/PAX6/GRHL3/MAB21L1/SH3PXD2B/USH1C/NES/PITX2/NAGLU/MEIS2/RHO/PITX3/CRYGA/SLC4A5/COL4A1/PPP1R13L/VSX1/FKBP8/CABP4/LHX1/GJA8/JMJD6/KRT12/SKI/ATF4/FOXE3/MTNR1B/SOX2/ISL1/ATP8A2/RPE65/SIX3/FBN2/ATF6/SPRED1/DIO3/PDE6A/SOX8/VAX1/OPN4/TFAP2A/SMARCD3/FZD5/RDH13/SDK1/NEUROD4/TMEM231/TH/TGFB2/SOX1/CRYBB3/WNT7B/RAX/GLI3/RP1L1/FGF10/CRYBA1/TTLL5/PBX4/SPRY1/BIRC7/COL8A1/PHACTR4/BMP6/CRYGD/STAT3/SDK2/NR2E3/SLC44A4/PTF1A/TGFBR2/PROX1/LAMA1/TGIF2/TFAP2B/GRHL2/SEMA3A/HIPK2/SMOC1/UNC45B/CRYGB/TSKU/NDP/JAG1/POU4F2/NTRK2/SPRED2/VEGFA/GATA3/HES5/RP1/LRP5/CRYAB/CYP1A1/GDF3/CHRDL1/ROM1/SMAD3/PHOX2B/POU4F1/ATP2B4/TMOD1/ALDH1A3/SPRY2/GNAT1/HPCA/WT1/SLC25A25/MEGF11/SOX11/FJX1/FOXC2/SRF/ACVR2B/KLF4/MYOM1/FOXC1/EPHA2 |
| GOCC_INTERMEDIATE_FILAMENT_CYTOSKELETON | GOCC_INTERMEDIATE_FILAMENT_CYTOSKELETON | 205 | -0.381064206 | -1.764548886 | 2.02E-05 | 0.000710796 | 0.000547538 | 4316 | tags=47%, list=28%, signal=35% | KRTAP6-1/KRT32/KRT76/KRT81/KRT3/KRT71/SHANK2/NEFM/KRTAP5-11/PKP1/KRT73/KRTAP4-11/KRTAP12-2/KRTAP13-2/KRTAP19-5/KRTAP10-9/SYNC/NES/KRT23/SYNE2/KRTAP26-1/KRT34/KRT19/GFAP/KRTAP10-7/DSP/KRTAP10-8/LMNA/KRT9/LMNB1/KRT84/KRT12/KRTAP4-2/KRT74/NDEL1/KRTAP12-4/KRT77/KRT6B/USP10/KRTAP10-4/KRT85/KRT25/KRTAP4-5/NARF/NOL9/KRT27/KRTAP4-12/KRTAP5-6/JUP/KRTAP20-1/FLG/KRTAP5-7/KRTAP5-1/KRTAP13-1/KRTAP9-3/KRTAP5-10/KRTAP10-11/KRT20/KRTAP5-4/KRTAP10-10/KRTAP9-4/KRTAP27-1/KRT38/KRT35/KRT15/KRTAP10-3/KRTAP12-1/KRTAP10-1/KRT28/KRT13/ADCY5/KRTAP4-1/KRT24/KRT7/KRTAP17-1/CASP14/KRT16/KRTAP5-9/KRTAP11-1/KRTAP5-2/IFFO2/KRT6A/KRTAP1-3/KRTAP4-4/KRT33B/KRTAP8-1/INA/SLC1A4/KRT4/S100A8/KRTAP5-3/HOXA13/KRT80/KRT72/KRTAP3-2/PRPH/UPP2 |
| GOBP_PURINE_CONTAINING_COMPOUND_METABOLIC_PROCESS | GOBP_PURINE_CONTAINING_COMPOUND_METABOLIC_PROCESS | 384 | 0.318604367 | 1.590420004 | 2.02E-05 | 0.000710796 | 0.000547538 | 3873 | tags=35%, list=25%, signal=27% | GPAM/GCK/ACOT12/PRKAA2/PDP2/ENO3/HMGCS1/SPHK2/TREM2/NUPR1/MVK/GPD1/GUCA2B/DBI/ELOVL6/PRPSAP2/SULT1E1/ADK/SLC35B3/ACSS2/DDIT4/PMVK/ACOT1/MVD/ELOVL2/PANK1/GIMAP7/DLD/NME7/LRRK2/ACOT9/SULT2A1/ADCY7/SEC13/DLG1/DGAT1/SUCLG2/GMPR2/ACOT8/PRKAG1/ADAL/NUP93/PFKM/ACSM2B/NUDT7/ELOVL1/ACSM1/PAPSS1/ADCY6/ACSM5/NUP43/DCK/ADSL/GCKR/ITPA/MFN1/SUCLA2/TMSB4X/FAR2/PGAM1/SULT1B1/PDE7A/NUP37/BPNT1/GLYAT/PANK3/PDHA1/ACSM3/NUDT2/PKLR/HMGCR/HSD17B8/DCAKD/NUDT1/PSEN1/NUDT9/CROT/PAPSS2/COASY/NME6/PRPSAP1/APRT/PANK2/NUP85/ELOVL5/SAMHD1/NME3/ACSF2/FASN/SCD/SLC25A1/MPP1/PPCS/DIP2A/PPT1/ACBD6/ATP6V1A/PIPOX/PFKL/SLC26A1/AK2/NUP54/HMGCL/BPGM/PDHB/MCEE/CBR4/SULT1C2/PGK1/PGAM2/DGAT2/GDA/CASK/ACAT1/FLCN/DGUOK/VCP/PRPS1/HK3/NPR1/ACOT11/XDH/FHIT/NUDT18/ACACA/HINT1/AK3/PGAM4/ENPP1/SHMT1/ALDOC/CARD11/ENTPD5/AMPD2 |
| GOCC_DNA_REPAIR_COMPLEX | GOCC_DNA_REPAIR_COMPLEX | 29 | 0.664203688 | 2.133301073 | 2.03E-05 | 0.000711498 | 0.00054808 | 3444 | tags=62%, list=22%, signal=48% | MSH2/NHEJ1/XPA/CETN2/PMS2/POLD1/RCOR1/TP53BP1/ERCC8/PMS1/XRCC4/MLH1/LIG4/DCLRE1C/XRCC5/ERCC4/XRCC1/ATM |
| GOBP_STEROL_METABOLIC_PROCESS | GOBP_STEROL_METABOLIC_PROCESS | 147 | 0.411881259 | 1.838040931 | 2.05E-05 | 0.000715246 | 0.000550966 | 1656 | tags=22%, list=11%, signal=20% | CYP7A1/GPAM/SQLE/PRKAA2/CEBPA/HMGCS1/CYB5R2/CYP11A1/MVK/FDFT1/ELOVL6/CYP39A1/LSS/IDI1/PCSK9/PMVK/TM7SF2/MVD/SEC14L2/CFTR/NFYB/SULT2A1/ACADL/NSDHL/ANGPTL3/CYB5R1/LIPA/CYP26A1/EBP/ARV1/APOA5/CYP51A1 |
| GOMF_HORMONE_ACTIVITY | GOMF_HORMONE_ACTIVITY | 106 | -0.456675746 | -1.890452766 | 2.08E-05 | 0.000722459 | 0.000556522 | 3865 | tags=48%, list=25%, signal=36% | AGRP/CSH2/GH1/GPHA2/CCK/GIP/UTS2/PTHLH/CRH/C1QTNF9/GH2/NPPA/RLN1/PNOC/GALP/PRL/OSTN/NPPC/ADIPOQ/HAMP/GHRL/CARTPT/VIP/RETN/UCN3/NPY/TG/CCL25/GHRH/SST/LEP/PYY/METRNL/PPY/IGF1/INSL3/PENK/STC2/THPO/EPO/RETNLB/ADM/TRH/ADCYAP1/ASIP/KL/EDN3/CALCA/STC1/INHBB/EDN1 |
| GOBP_ANTIGEN_PROCESSING_AND_PRESENTATION | GOBP_ANTIGEN_PROCESSING_AND_PRESENTATION | 223 | 0.363716708 | 1.707149149 | 2.09E-05 | 0.000722459 | 0.000556522 | 4943 | tags=51%, list=32%, signal=35% | TREM2/PSMD10/KIF22/ERAP1/AP1S1/RACGAP1/HLA-DRB3/PSMB9/ATG5/PSMA2/CCL19/MR1/PSMB7/DYNC1I2/IDE/PSME2/CD36/PSMD14/SEC13/HLA-DMA/PSMA4/RAB4A/HLA-DMB/PSMD4/VAMP8/VAMP3/KIF3A/SEC24A/HFE/SEC24D/CD8A/CLEC4M/IKBKB/SEC23A/PSMD7/KIFAP3/PSMD1/CLTA/DCTN5/PDIA3/HLA-F/PSMA3/TAP2/TAPBPL/ACTR10/PSMD13/CLEC4A/AP2B1/PSMD11/KIF3B/SEC31A/KIF11/DYNC1LI1/RFTN1/TAPBP/CLTC/DYNLL1/SNAP23/RAB10/DYNC1H1/PSMA1/HLA-DOA/PSMB10/PSMC6/PSMB5/CALR/RAB32/HLA-A/SAR1B/PSMC4/FCGR2B/FGL2/B2M/PSMC3/PSME1/CENPE/PSMB1/PSMD2/ITGAV/MFSD6/HLA-DPA1/SEC24C/DCTN4/NCF2/PSMA5/DCTN6/AP3B1/HLA-DQB1/KIF2A/SEC24B/KIF2C/HLA-B/IFI30/PSMC5/CTSF/AP1B1/PYCARD/DYNLL2/PSMB8/DCTN3/CYBB/KLC1/ACTR1A/PSMB4/CTSD/CD1C/CTSS/HLA-DQA1/AP2S1/AP2M1/CANX/CD74/PSMD6/HLA-DRA |
| GOBP_MUSCLE_TISSUE_DEVELOPMENT | GOBP_MUSCLE_TISSUE_DEVELOPMENT | 325 | -0.338464176 | -1.661041502 | 2.12E-05 | 0.000726068 | 0.000559302 | 3557 | tags=33%, list=23%, signal=26% | MYOCD/HIVEP3/G6PD/SOX15/CFL2/FGF20/MYOZ1/SIRT6/LMOD3/DSP/MSC/PPP1R13L/EGR2/NKX2-5/HOXD9/ACTC1/WNT10B/TCF21/SKI/FKBP1A/DDX5/FGF8/HNRNPU/PTCH1/COL19A1/YAP1/ISL1/BVES/HAMP/MSTN/HOXD10/SEMA3C/ACVR1/SOX8/VAX1/KAT2A/NOG/MAML1/JPH2/RYR2/CAV1/AKAP13/TBX5/S1PR1/ZFAND5/TGFB2/DKK1/RGS4/KEL/SAP30/SMYD1/RBM24/SLC9A1/WNT3A/CSRP3/PDLIM5/FZD7/EFNB2/PAX5/GJC1/LRP2/AKIRIN1/TGFBR2/PROX1/EPHB1/SIX4/FHOD3/BMP2/TGFB1/LOX/VEGFA/IGF1/HAND1/ELN/TGFBR3/GATA6/PI16/BTG2/TIPARP/SMAD3/PHOX2B/POU4F1/GJA1/KDM6B/WT1/GATA4/NPHS1/ATF3/HOMER1/SOX11/FOXC2/SRF/OSR1/MYO18B/PPARGC1A/MYH11/MAFF/EDN1/PIM1/KLF5/RGS2/MYOM1/SIK1/FOXC1/FOS/EGR1 |
| GOCC_VESICLE_TETHERING_COMPLEX | GOCC_VESICLE_TETHERING_COMPLEX | 57 | 0.550929361 | 2.060136631 | 2.13E-05 | 0.000726068 | 0.000559302 | 4183 | tags=56%, list=27%, signal=41% | AKTIP/VPS8/COG4/VPS41/COG5/TRAPPC6B/STX17/VPS11/TRAPPC6A/EXOC4/NBAS/COG6/TRAPPC2/VPS39/DNAJC28/EXOC6/VPS54/RAB10/COG1/TRAPPC3/SH3BP1/MYRIP/VPS33A/COG3/EXOC8/ZW10/RINT1/TRAPPC2L/VPS52/EXOC1/EXOC2/HOOK3 |
| GOCC_ENDOPLASMIC_RETICULUM_PROTEIN_CONTAINING_COMPLEX | GOCC_ENDOPLASMIC_RETICULUM_PROTEIN_CONTAINING_COMPLEX | 96 | 0.464470947 | 1.941768687 | 2.20E-05 | 0.000746223 | 0.000574829 | 4147 | tags=53%, list=27%, signal=39% | SPTLC3/ELOVL6/SPCS2/PDIA6/PIGK/DERL2/OS9/SEL1L/ORMDL1/SEC61G/SEC61A2/NBAS/SPTLC2/AMFR/PDIA3/PIGY/TAP2/SDF2L1/DNAJC10/HSPA5/DERL3/MAGT1/GANAB/STT3B/OSTC/PIGP/STT3A/ORMDL2/DDOST/TAPBP/RNF139/SPCS3/INSIG2/SEC11A/CALR/SREBF2/SPTLC1/HLA-A/HYOU1/TUSC3/SRP9/B2M/VCP/ZW10/FAM8A1/RINT1/ARL6IP1/RP9/SEC63/SEC11C/ALG14 |
| GOBP_CELLULAR_RESPONSE_TO_CHOLESTEROL | GOBP_CELLULAR_RESPONSE_TO_CHOLESTEROL | 16 | 0.763352597 | 2.153436694 | 2.26E-05 | 0.000762767 | 0.000587572 | 1318 | tags=44%, list=8%, signal=40% | CYP7A1/HMGCS1/GRAMD1C/GPLD1/SMO/INHBA/AACS |
| GOBP_REGULATION_OF_CELL_CYCLE_PHASE_TRANSITION | GOBP_REGULATION_OF_CELL_CYCLE_PHASE_TRANSITION | 398 | 0.320502813 | 1.610820076 | 2.32E-05 | 0.000780319 | 0.000601094 | 3589 | tags=34%, list=23%, signal=27% | NINL/UBD/GPNMB/NDC80/CDK5RAP2/ANAPC7/NPM2/PSMD10/BRCA1/DTL/CETN2/MAD2L1/PCNA/CEP290/CHEK1/ZWINT/AURKA/HMMR/TUBG1/PKD2/PSMB9/BUB1/PBX1/PSMA2/BRCC3/ANLN/CDK6/CNOT8/PSMB7/GEN1/CDC23/DYNC1I2/PSME2/FZR1/IK/MTA3/PSMD14/RAD51C/AURKB/CDC73/KANK2/DLG1/DONSON/USP47/CDT1/CEP78/PSMA4/SDCCAG8/NEDD1/ZFYVE19/GADD45A/PPP1R9B/CEP250/APC/RFPL1/PSMD4/NAE1/NSMCE2/NEK2/CEP152/PSMD7/RPL26/PSMD1/RAD17/TRIAP1/KLHL22/PSMA3/TRIP13/FBXO7/ESPL1/PSMD13/MAD2L2/SKP1/PHB2/CEP70/KNTC1/SLFN11/XRCC3/BTRC/NPM1/RBL1/RBX1/PSMD11/CEP63/CEP192/DYNC1LI1/CDKN1B/RB1/ANAPC11/DYNLL1/PLK4/DYNC1H1/APEX1/SYF2/SUSD2/PSMA1/ANAPC5/CHEK2/CDC20/PSMB10/CDKN2C/PSMC6/APPL1/PSMB5/CENPJ/DLGAP5/RIOK2/PTEN/BUB3/VPS4B/TAF1/CLSPN/PRKACA/PSMC4/ANAPC2/CDC6/TMOD3/PSMG2/SENP2/ZNF830/PSMC3/BRD7/CDC16/DDRGK1/MYO16/LCMT1/PSME1/FOXO4/UBE2E1/PAXIP1/ATM/PAFAH1B1/ALMS1/CENPE/PSMB1/PRMT2/PSMD2 |
| GOBP_CHEMOKINE_PRODUCTION | GOBP_CHEMOKINE_PRODUCTION | 86 | -0.48005584 | -1.904572044 | 2.37E-05 | 0.000790903 | 0.000609246 | 1651 | tags=27%, list=11%, signal=24% | FFAR3/TICAM1/AZU1/DDX3X/NOD2/FOXP1/CXCL6/LBP/S100A9/S100A8/FFAR2/SIRPA/ARG2/ADCYAP1/IL10/IL1B/APOD/IL1RL1/KLF4/IL4R/EPHA2/EGR1/IL6 |
| GOBP_VESICLE_BUDDING_FROM_MEMBRANE | GOBP_VESICLE_BUDDING_FROM_MEMBRANE | 101 | 0.459389277 | 1.945058943 | 2.48E-05 | 0.000823238 | 0.000634155 | 4208 | tags=48%, list=27%, signal=35% | CHMP4A/FNBP1L/KLHL12/SCFD1/TRAPPC6B/GOLPH3L/MIA3/TRAPPC6A/F8/GOLGA2/CHMP5/TFG/SEC13/BET1/TMED10/SEC23B/NSF/CHMP6/SEC24A/SEC24D/SEC23A/CTSZ/GOSR2/TRAPPC2/LMAN1/SEC31A/TMED2/CTSC/GBF1/MX1/SEC16B/SAR1B/ANXA2/ARFGAP2/MCFD2/TRAPPC3/SAR1A/TBC1D20/PRKCI/SEC24C/STX5/SEC31B/USO1/TRAPPC2L/AP3B1/SNX3/SEC24B/VAPB |
| GOBP_TRANSMISSION_OF_NERVE_IMPULSE | GOBP_TRANSMISSION_OF_NERVE_IMPULSE | 66 | -0.522230471 | -1.996455452 | 2.61E-05 | 0.00086324 | 0.000664969 | 3524 | tags=50%, list=23%, signal=39% | ITGA2/SCN10A/JAM3/SCN2A/CLDN19/MTNR1B/CNTNAP1/GHRL/CACNA1I/CACNG5/SCN5A/KCNMB4/CARTPT/S1PR1/CACNA1G/SPTBN4/DRD5/AVPR1A/GLRA1/SCN1A/NTRK2/KCNA1/SCN9A/GPR88/CHRM5/GHSR/CACNG3/CACNG7/MAG/SCN7A/CACNG2/P2RX1/TNR |
| GOBP_NEGATIVE_REGULATION_OF_MAPK_CASCADE | GOBP_NEGATIVE_REGULATION_OF_MAPK_CASCADE | 160 | -0.404435592 | -1.806277095 | 2.72E-05 | 0.000896777 | 0.000690803 | 2668 | tags=31%, list=17%, signal=26% | CBLC/DUSP26/ADIPOQ/ABL1/SPRY3/SEMA6A/SPRED1/DUSP19/WNK2/CAV1/PRDM15/RGS14/RGS4/PTPN1/CRYBA1/SPRY1/NCOR1/SLC9A3R1/LMO3/PPEF2/DUSP1/DUSP16/DUSP9/PSCA/HYAL2/DUSP21/TIMP3/SPRED2/DUSP10/RAPGEF1/DACT1/FBLN1/IRAK3/DUSP5/CHRNA10/SPRY2/SIRPA/C1QL4/CSK/ATF3/DUSP8/DUSP6/IL1B/FOXO1/RGS2/LIF/SPRY4/KLF4/MYC |
| GOBP_REGULATION_OF_PROTEIN_SERINE_THREONINE_KINASE_ACTIVITY | GOBP_REGULATION_OF_PROTEIN_SERINE_THREONINE_KINASE_ACTIVITY | 447 | -0.307041278 | -1.555560987 | 2.76E-05 | 0.000903719 | 0.00069615 | 2752 | tags=24%, list=18%, signal=20% | INSR/SPDYA/ACTB/CBLC/SIRT1/ADIPOQ/CSPG4/ABL1/SPRY3/GHRL/SPRED1/CCNA1/CCNL1/DIRAS3/DUSP19/MAP3K6/FZD5/FAM20A/HERC5/CAV1/CCNO/AKAP13/CDKN2B/DBF4B/PRKAG3/RGS14/DKK1/RGS4/IRAK1/FGF10/PTPN1/AVPI1/PDGFC/SPRY1/BIRC7/NPFFR2/MAP2K3/CCNT1/MAPRE3/TRIB2/PPEF2/CXCR4/FGD2/DUSP1/DUSP16/PDGFB/SLC27A1/PROX1/SLC8A3/FLT3/DUSP9/HYAL2/DDX3X/DUSP21/NOD2/NTRK3/PSRC1/GRM4/BMP2/TGFB1/MAPKAPK2/SPRED2/DUSP10/VEGFA/IGF1/IRAK2/LRP5/TNFAIP3/IRAK3/DUSP5/PROK1/TRIB1/ATP2B4/TFAP4/CDKN1A/SPRY2/ARHGEF5/SAA1/LATS2/ADRB2/CSK/C5AR1/DUSP8/S1PR2/FGFR1/IGFBP6/SBK2/FPR1/DUSP6/CIT/SERTAD1/RASIP1/EDN3/ERN1/LPAR1/IL1B/SLC8A2/EDN1/RGS2/SFN/S100A12/SPRY4/TNIK/THBS1/GADD45B/TGFB3/PROK2/GADD45G |
| GOBP_NEGATIVE_REGULATION_OF_SMOOTH_MUSCLE_CONTRACTION | GOBP_NEGATIVE_REGULATION_OF_SMOOTH_MUSCLE_CONTRACTION | 11 | -0.840085166 | -2.029332726 | 2.78E-05 | 0.000903719 | 0.00069615 | 419 | tags=27%, list=3%, signal=27% | ADRB2/CALCA/RGS2 |
| GOBP_NUCLEAR_TRANSCRIBED_MRNA_CATABOLIC_PROCESS_NONSENSE_MEDIATED_DECAY | GOBP_NUCLEAR_TRANSCRIBED_MRNA_CATABOLIC_PROCESS_NONSENSE_MEDIATED_DECAY | 113 | 0.441647953 | 1.907715746 | 2.79E-05 | 0.000903719 | 0.00069615 | 5581 | tags=55%, list=36%, signal=35% | RPS4Y1/RPS21/PNRC2/UPF3B/RPL7A/RPS26/RPSA/RPS7/NBAS/RPL26/RPL23A/RPL37/RPL7/RPL35A/SMG1/RPL13A/DCP2/RPS23/RPS29/RPL8/RPL15/RPLP0/RPL34/RPL17/RPS3A/RPL41/RPS2/SMG6/RPL29/NCBP2/RPL9/MAGOHB/RPL11/DCP1B/RPS15A/RPL3/UPF3A/RPL21/RPS27A/RPS3/RPL31/RPS9/RPL27A/RPS24/RPS12/RPS8/NCBP1/RPL23/UPF2/RPL22/RBM8A/SECISBP2/RPL37A/RPL19/RPS17/RPL24/RPS15/RPS10/PARN/RPL6/RPL35/RPL10 |
| GOBP_ORGANOPHOSPHATE_BIOSYNTHETIC_PROCESS | GOBP_ORGANOPHOSPHATE_BIOSYNTHETIC_PROCESS | 499 | 0.299018189 | 1.529579008 | 2.80E-05 | 0.000903719 | 0.00069615 | 3021 | tags=27%, list=19%, signal=23% | GPAM/ME1/TYMS/FABP5/PDP2/FADS1/HMGCS1/SPHK2/TREM2/DHDDS/MTMR4/IDO2/MVK/AKR1A1/GPD1/GUCA2B/PLA2G1B/HTR2B/ELOVL6/PRPSAP2/PIGF/PNPLA3/IP6K3/IDI1/ADK/SLC35B3/ACP6/UCK1/PIGB/ACSS2/IDH1/SERAC1/PMVK/SLC44A3/MVD/PLD6/ELOVL2/PANK1/MTM1/PIGK/IP6K2/DOLPP1/DUT/PITPNM2/PIK3R1/DLD/DDHD1/NME7/PIP4K2B/ADCY7/NMNAT1/MPPE1/TK1/PIK3C2G/RAB4A/MOCS2/ELOVL1/PAPSS1/ADCY6/DCK/CMPK2/ADSL/NMNAT3/TMSB4X/SACM1L/RRM2B/SPTLC2/CEPT1/RRM1/PDGFA/PIGY/STARD10/PIK3R2/PARP9/LCLAT1/PANK3/PDHA1/PIGN/NUDT2/PKLR/NUDT12/PLD1/HSD17B8/PLA2G4A/DCAKD/AGPAT5/FIG4/DPM3/INPP5D/CRLS1/DOLK/CTPS2/SH3YL1/PAPSS2/COASY/PIGP/NME6/PRPSAP1/APRT/GNPAT/PANK2/ELOVL5/LPCAT2/PCTP/NME3/AFMID/NFS1/NR1H4/PARP16/CD244/FASN/SCD/TPK1/PI4K2B/SLC25A1/RFK/PPCS/ITPKA/DIP2A/PPT1/PLA2G4C/ATP6V1A/CMPK1/QPRT/ABHD8/SLC26A1/PIGV/PIP4K2C/ARF3/AK2/PTEN/PIK3R3/AGPAT1/PDHB/CBR4 |
| GOBP_ELECTRON_TRANSPORT_CHAIN | GOBP_ELECTRON_TRANSPORT_CHAIN | 152 | 0.413151559 | 1.847872092 | 2.85E-05 | 0.000915401 | 0.000705149 | 4822 | tags=50%, list=31%, signal=35% | ME1/ADH5/AKR1A1/GPD1/P4HA2/DMGDH/COX15/NDUFAF1/GPX2/QDPR/NDUFA5/NDUFS4/NDUFA6/NQO2/DLD/CYB5B/NDUFB2/POLG2/NDUFB1/AIFM2/AKR1B1/COX11/RDH16/NDUFB4/CYB561/GLDC/NDUFA10/COX7A2L/MAOB/NDUFA9/NDUFB6/UQCRB/ASPH/UQCRQ/IMMP2L/NDUFV1/UQCRC2/COX7A2/SURF1/ETFA/FDX1/COX6C/PARK7/SDHA/NDUFA11/NDUFB10/DGUOK/COX6B1/XDH/NDUFC1/IDO1/ME2/ISCU/NCF2/NDUFAB1/NDUFB3/NDUFA12/ETFB/HSD17B6/COX6A1/GLRX2/UQCRC1/SDHD/NDUFB5/NDUFS2/SLC25A22/CYBB/SDHC/CIAPIN1/NDUFA1/AKR1C4/NDUFS5/COX4I1/BID/IDH3B/NDUFS8 |
| GOBP_VASCULOGENESIS | GOBP_VASCULOGENESIS | 73 | -0.499447998 | -1.938765502 | 2.87E-05 | 0.000915523 | 0.000705243 | 2476 | tags=38%, list=16%, signal=32% | YAP1/CD34/SPRED1/HEY1/CAV1/TBX5/ZMIZ1/WNT7B/CITED1/GJC1/TGFBR2/TGFB1/NTRK2/VEGFA/CEACAM1/TGFBR3/TIPARP/HOXA13/WT1/ADM/TEAD2/MYO18B/ITGB8/RASIP1/HAS2/SOX17/EPHA2/JUNB |
| GOBP_SMALL_MOLECULE_CATABOLIC_PROCESS | GOBP_SMALL_MOLECULE_CATABOLIC_PROCESS | 395 | 0.312520805 | 1.566994821 | 2.94E-05 | 0.000933807 | 0.000719328 | 3732 | tags=34%, list=24%, signal=26% | CYP7A1/AKR1B10/ADH5/GCK/DDO/ENO3/CSAD/IDO2/DAO/AKR1A1/AMACR/ACBD5/NPL/CYP39A1/SULT1E1/HIBCH/CDADC1/QDPR/GALT/TYMP/ECHDC1/DLD/GALM/GCSH/ACAD8/BCAT1/SULT2A1/ACADL/CRYM/FUT10/GLS/RBKS/HADH/NUDT5/ACOT8/ACAA1/HAO1/BDH2/ADAL/ALDH8A1/PFKM/APOBEC3C/NUDT7/KHK/PHYH/DDAH2/GLB1/NAGK/CYP26A1/GLDC/DBT/IRS1/SCP2/DECR1/PGAM1/HACL1/BDH1/HNMT/SULT1B1/BPNT1/HAGH/ACADM/PCCB/GNPDA1/ABCD2/THNSL2/ESD/MCCC1/AUH/PKLR/ALDH1B1/CYP4F2/NUDT1/AKR1D1/INPP5A/PGD/HPD/CDA/ABHD1/NUDT9/MTHFS/CROT/EHHADH/GLUD2/ABCD3/HSD17B10/TXN2/FAH/TYSND1/AMDHD2/AFMID/APOBEC3G/CPT1B/PEX7/PIPOX/QPRT/ETFA/PFKL/ACAT2/PECR/PTEN/PARK7/HMGCL/BPGM/FUT8/MCEE/DPYS/GLUL/PGK1/PGAM2/ALDH3A2/SYNJ1/ACAT1/BCKDK/XYLB/PON1/IVD/ACOX2/HADHB/HK3/AGXT2/UROC1/TST/ACAD10/MPST/XDH/ALDH1L1/ECH1/IDO1/RPE/NUDT18/GK5/ACMSD |
| GOMF_CATALYTIC_ACTIVITY_ACTING_ON_DNA | GOMF_CATALYTIC_ACTIVITY_ACTING_ON_DNA | 178 | 0.388891847 | 1.776881567 | 3.05E-05 | 0.000965338 | 0.000743617 | 4487 | tags=46%, list=29%, signal=33% | TOP2A/MCM5/PCNA/ZRANB3/NEIL2/RFC1/FEN1/POLE2/SMC6/POLD1/MCM6/POLB/MCM2/OGG1/GEN1/EXD2/RAD51C/POLH/POLG2/RUVBL2/RFC3/APLF/SMARCAD1/POLK/DNASE1/DCLRE1A/RAD17/POLI/ASCC3/DNASE2/XRCC3/CHTF8/RFC5/N6AMT1/LIG4/ATRX/DCLRE1C/APEX1/RECQL/PLD3/NEIL1/PLD4/DCLRE1B/RFC4/DFFB/TDP1/CHTF18/RUVBL1/XRCC5/ALKBH4/NTHL1/MBD4/RAD9A/ERCC4/XRCC1/TOP1MT/DSCC1/SETX/DDX11/EXOG/POLD3/EXO1/MCM8/FTO/MGMT/CHD1L/MCM4/ERCC3/FANCM/RPS3/CHD4/HELQ/RAD50/PTGES3/GTF2F2/RAD54B/POLM/DNMT3A/RECQL4/DHX9/DDX1/RAD54L |
| GOMF_TRANSFERASE_ACTIVITY_TRANSFERRING_ACYL_GROUPS | GOMF_TRANSFERASE_ACTIVITY_TRANSFERRING_ACYL_GROUPS | 196 | 0.373923602 | 1.735653393 | 3.14E-05 | 0.000988494 | 0.000761454 | 3388 | tags=35%, list=22%, signal=27% | GPAM/SPTLC3/HMGCS1/ZDHHC2/NAT8B/NAGS/MOGAT3/NAT1/ELOVL6/PNPLA3/MOGAT1/MOGAT2/OSGEPL1/ELOVL2/LRAT/SUPT7L/ESCO2/NMT1/CLOCK/GLYATL1/DGAT1/NAT9/ACAA1/NAT2/ACSM2B/ELOVL1/ACSM1/ACSM5/MSL3/TMEM68/DBT/SPTLC2/SCP2/GOLGA7/GLYAT/LCLAT1/ACSM3/PLA2G4A/AGPAT5/CRLS1/CROT/GNPAT/ELOVL5/CLYBL/LPCAT2/FASN/ZDHHC3/ESCO1/PAFAH2/PLA2G4C/KAT5/CPT1B/ABHD8/NAT8/CASD1/SPTLC1/ATF2/ACAT2/HHAT/TAF1/AGPAT1/GLUL/DGAT2/KAT2B/NMT2/ACAT1/AGPAT2/ZDHHC20 |
| GOBP_NON_RECOMBINATIONAL_REPAIR | GOBP_NON_RECOMBINATIONAL_REPAIR | 67 | 0.521082112 | 2.010026824 | 3.17E-05 | 0.000993777 | 0.000765524 | 3444 | tags=51%, list=22%, signal=40% | NHEJ1/BRCA1/NUDT16L1/BRCC3/POLB/OGG1/PSMD14/DCLRE1A/SMARCAL1/TP53BP1/PARP9/ERCC8/ERCC6/UVRAG/MAD2L2/HERC2/XRCC4/MLH1/LIG4/DCLRE1C/KAT5/REXO4/SUMO1/USP51/RAD52/DCLRE1B/HMGB2/POT1/XRCC5/ERCC4/XRCC1/RNF8/PAXIP1/ATM |
| GOBP_RESPONSE_TO_KETONE | GOBP_RESPONSE_TO_KETONE | 188 | -0.378155626 | -1.732325568 | 3.35E-05 | 0.001042959 | 0.00080341 | 2233 | tags=26%, list=14%, signal=23% | P2RY4/CAV1/ABHD2/LARP1/TH/SRD5A1/TGFB2/AKAP8/UCN3/TBXA2R/SLIT3/AVPR1A/ELK1/ADCY5/TRERF1/ADCY3/NKX2-2/NKX3-1/DUSP1/MTAP/CCR7/WBP2/KLF9/TGFB1/KLF2/SGK1/CCL21/DCPS/GHSR/TGFBR3/TFAP4/EPO/CDKN1A/HPCA/CA9/TRH/ICAM1/GABRB1/HOXD13/PTGER2/FOXO1/EDN1/SCNN1B/THBS1/KLF4/TGFB3/FOSL1/FOS/FOSB |
| GOBP_LYMPH_VESSEL_DEVELOPMENT | GOBP_LYMPH_VESSEL_DEVELOPMENT | 25 | -0.682276637 | -2.108211418 | 3.36E-05 | 0.001042959 | 0.00080341 | 1358 | tags=32%, list=9%, signal=29% | PROX1/PDPN/VEGFA/VEGFC/FOXC2/ACVR2B/FOXC1/EPHA2 |
| GOCC_SPINDLE_POLE | GOCC_SPINDLE_POLE | 129 | 0.416618133 | 1.821497682 | 3.50E-05 | 0.001081021 | 0.000832729 | 4143 | tags=44%, list=27%, signal=33% | CKAP2/ASPM/CDK5RAP2/UBXN2B/MAD2L1/AURKA/TUBG1/NUDCD2/SMC6/BRCC3/CKAP2L/KATNAL1/GOLGA2/IK/AURKB/NEDD1/STAG1/PKP4/CALM3/NEK2/TACC3/KATNB1/KLHL22/YPEL5/UNC119/KNTC1/PRC1/NPM1/NEK7/CEP63/KIF11/TNKS/DYNC1LI1/NIN/PLK4/TBCCD1/PLEKHG6/CDC20/DLGAP5/VPS4B/TUBGCP3/STAG2/WDR62/CDC6/CSPP1/ALMS1/CTNNB1/NUBP2/DCTN4/UXT/ZW10/BCCIP/DDX11/NSFL1C/MAPK14/KIF2A/KIF20B |
| GOBP_POSITIVE_REGULATION_OF_NERVOUS_SYSTEM_DEVELOPMENT | GOBP_POSITIVE_REGULATION_OF_NERVOUS_SYSTEM_DEVELOPMENT | 240 | -0.35769541 | -1.686860506 | 3.68E-05 | 0.001129323 | 0.000869937 | 2692 | tags=28%, list=17%, signal=23% | ASPA/ZNF335/PTPRZ1/GHRL/LINGO2/RELA/HAP1/MAPT/SOX8/SMARCD3/CLSTN2/PLXNA2/DBN1/RGS14/CBLN1/SLITRK1/SHANK3/HES1/NPTN/GLI3/ZFYVE27/MAP1B/EEF2K/KALRN/ZNF365/WNT3A/ISLR2/AMIGO3/CX3CL1/TTBK1/TNFRSF1B/ARHGDIA/CXCR4/NKX2-2/LRP2/LRRTM2/PTPRD/NLGN3/EPHB1/DCT/CUX2/TPBG/BMP2/TGFB1/POU4F2/NTRK2/VEGFA/IL1RAP/OTP/NLGN1/SEMA4A/FLRT3/RND2/SLITRK2/PLXNA3/VEGFC/SOX11/MAG/WNT3/SRF/CDH4/IL1B/LIF/CLCF1/IL6/SLITRK3 |
| GOBP_REGULATION_OF_NERVOUS_SYSTEM_PROCESS | GOBP_REGULATION_OF_NERVOUS_SYSTEM_PROCESS | 123 | -0.427041116 | -1.819662784 | 3.70E-05 | 0.001131543 | 0.000871647 | 3951 | tags=46%, list=25%, signal=35% | BEGAIN/DLG4/RIMS1/RIMS2/GRIN1/CCK/SMR3A/HTR2C/ITGA2/NRXN1/DLGAP1/EGR2/CHRNA7/NTSR1/MTNR1B/GRIN2D/SHANK1/JAM2/DMPK/IGSF11/GHRL/CACNG5/STX1B/CARTPT/STX1A/ITGAX/TNFRSF21/VIP/CBLN1/SHANK3/KLK8/RGS4/SLC25A12/SLC9A1/TMEM108/AVPR1A/TNFRSF1B/GLRA1/NLGN3/SLC8A3/NPTX1/DLGAP4/CUX2/TMEM25/GHSR/NLGN1/NPTX2/NOS3/ADRB2/CCL3/HOMER1/MAG/S1PR2/IL10/TNR/SLC8A2/EDN1 |
| GOBP_REGULATION_OF_NEUROGENESIS | GOBP_REGULATION_OF_NEUROGENESIS | 318 | -0.332249081 | -1.626192687 | 3.72E-05 | 0.001131819 | 0.00087186 | 2797 | tags=28%, list=18%, signal=23% | TLX2/YAP1/DRD3/ASPA/ZNF335/TRIM11/MT3/PTPRZ1/RELA/HAP1/SEMA6A/SEMA3C/SEMA6C/MAPT/SOX8/VAX1/HEY1/OMG/NOG/SMARCD3/ID1/MAP2/PLXNA2/TRIM46/DBN1/RGS14/SLITRK1/SHANK3/HES1/NPTN/CCL11/GLI3/ZFYVE27/KIAA0319/SEMA3D/MAP1B/NFATC4/EEF2K/KALRN/ZNF365/DLL3/WNT3A/SEMA4F/ISLR2/SEMA3B/CX3CL1/TTBK1/TNFRSF1B/ARHGDIA/CXCR4/NKX2-2/LRP2/PTPRD/HES2/SEMA3A/DCT/CUX2/BMP2/TGFB1/POU4F2/NTRK2/DUSP10/VEGFA/HES5/OTP/DAAM2/DCC/SEMA4A/GPR37L1/POU4F1/RND2/PER2/PLXNA3/VEGFC/SOX11/MAG/WNT3/SEMA4B/ADCYAP1/SRF/LDLR/CDH4/LRP4/IL1B/TNR/NR1D1/LIF/CLCF1/IL6 |
| GOBP_STEROID_BIOSYNTHETIC_PROCESS | GOBP_STEROID_BIOSYNTHETIC_PROCESS | 171 | 0.389639091 | 1.765708621 | 3.85E-05 | 0.001166722 | 0.000898746 | 2912 | tags=32%, list=19%, signal=26% | CYP7A1/GPAM/SQLE/PRKAA2/HMGCS1/CYB5R2/BMP5/CYP11A1/MVK/AMACR/FDFT1/ELOVL6/STARD4/CYP39A1/LSS/SDR42E1/IDI1/PMVK/TM7SF2/MVD/PBX1/DHRS11/SEC14L2/CFTR/NFYB/NSDHL/HSD11B1/ACOT8/CYB5R1/CLCN2/SRD5A2/AKR1B1/EBP/ARV1/SCP2/APOA5/CYP51A1/CYP2R1/HMGCR/HSD17B8/AKR1D1/CYP3A7/OSBPL2/HSD17B10/NR1H4/FASN/SCD/MED1/INSIG2/FDX1/DHCR7/NFYA/SNAI2/SREBF2/ACAT2 |
| GOCC_OXIDOREDUCTASE_COMPLEX | GOCC_OXIDOREDUCTASE_COMPLEX | 93 | 0.469803753 | 1.959543903 | 3.95E-05 | 0.001191215 | 0.000917613 | 5623 | tags=61%, list=36%, signal=39% | GPD1/NDUFAF1/NDUFA5/NDUFS4/NDUFA6/DLD/GCSH/CYB5B/NDUFB2/NDUFB1/GMPR2/NDUFB4/GLDC/NDUFA10/DBT/RRM1/NDUFA9/PDHA1/NDUFB6/UQCRB/UQCRQ/NDUFV1/UQCRC2/PDHB/CBR4/SDHA/BCS1L/FOXRED1/BCKDK/NDUFA11/NDUFB10/NDUFC1/NCF2/NDUFAB1/NDUFB3/NDUFA12/UQCRC1/SDHD/NDUFB5/NDUFS2/CYBB/SDHC/NDUFA1/PDHX/NOXO1/NDUFS5/MRPS36/NDUFS8/NDUFS7/NDUFB11/BCKDHB/NDUFA8/NDUFA2/NDUFV2/NDUFA7/NDUFC2/NDUFB7 |
| GOBP_PROCESS_UTILIZING_AUTOPHAGIC_MECHANISM | GOBP_PROCESS_UTILIZING_AUTOPHAGIC_MECHANISM | 469 | 0.294397768 | 1.500346632 | 3.99E-05 | 0.001192046 | 0.000918254 | 4248 | tags=38%, list=27%, signal=28% | EEF1A2/PRKAA2/SPATA18/CASP1/TRIM22/UBXN2B/CHMP4A/FNBP1L/TREM2/NUPR1/MTMR4/TRIM5/PRKAB2/ACBD5/STBD1/HTR2B/SCFD1/NHLRC1/CDK5/WIPI1/VPS41/TRIM68/ZKSCAN3/VPS37D/STX17/ATP6V0D1/RAB8A/ATG5/NRBF2/VPS11/KLHL3/EI24/MTM1/SESN3/ATG4C/TRIM14/FIS1/VPS13C/LRRK2/PIP4K2B/CD84/NBR1/GOLGA2/RRAGB/EXOC4/WDR41/KEAP1/FYCO1/OPTN/RNF185/ZFYVE1/PRKAG1/LAMP3/SNAPIN/ATP6V0E2/CASP3/ATG10/CHMP6/HDAC6/VAMP8/USP30/FUNDC1/RAB33B/ADRA1A/ATP6V1H/MFN1/CHMP2A/ATP6V1E2/STUB1/STAM2/SPTLC2/SNX5/VPS25/SNX14/FEZ2/LAMP2/MAPK8/KLHL22/ATG4A/PIK3R2/MLST8/MAP3K7/VTA1/FBXO7/UVRAG/PHB2/SMG1/RHEB/ATP6V1D/MFSD8/VPS39/PSEN1/MID2/USP33/UFC1/SCOC/TMEM208/GABARAPL2/ROCK1/CISD2/ATP6V1B2/MAPK3/UBXN2A/CLTC/DYNLL1/ATP6V1A/KAT5/RAB12/RNF5/PIP4K2C/WDR24/DNM1L/SREBF2/SPTLC1/VPS35/PARK7/TOLLIP/VPS4B/SEC16B/HERC1/PRKACA/PRKD1/SH3GLB1/RAB3GAP2/LRSAM1/ATG7/UBA5/ATG3/CTSK/POLDIP2/HTRA2/ATP6V0D2/CAPN1/SESN1/SVIP/ERCC4/ZMPSTE24/DDRGK1/FLCN/NEDD4/ATM/VCP/VPS33A/BOK/DCN/VPS26A/LIX1L/SNX6/SLC38A9/FEZ1/MAP1LC3A/IFT20/TOMM6/BECN1/ATP6V1C1/EXOC8/HAX1/DRAM1/UFM1/TRIM21/EXOC1/NSFL1C/ATP13A2/RRAGC/CHMP2B/FBXW7/TMEM41B/PIK3CB/TRIM6/PRKAB1/TLK2/ATP6V0E1/HSP90AA1/BAD/CTTN/ADPRH/CSNK2A2/PYCARD |
| GOBP_RESPONSE_TO_INTERLEUKIN_1 | GOBP_RESPONSE_TO_INTERLEUKIN_1 | 183 | -0.386868731 | -1.764034592 | 3.99E-05 | 0.001192046 | 0.000918254 | 1694 | tags=21%, list=11%, signal=19% | CCL25/CITED1/CX3CL1/NKX3-1/CCL20/PLCB1/MTHFR/HYAL2/NOD2/TNIP2/SLC30A8/IL1A/CCL3L3/KLF2/IL1RAP/CCL21/IRAK2/IRAK3/PSMB11/CCL26/EPO/SIRPA/PELI2/CCL3/CCL7/ICAM1/AKAP12/PELI1/IL1RN/HAS2/MAP3K8/IL1B/NR1D1/EDN1/CCL2/ZC3H12A/EGR1/IL6 |
| GOBP_RHYTHMIC_BEHAVIOR | GOBP_RHYTHMIC_BEHAVIOR | 43 | -0.593188618 | -2.092054631 | 4.22E-05 | 0.001255111 | 0.000966834 | 4454 | tags=72%, list=29%, signal=52% | NMU/ID2/GHRHR/NPY2R/KCND2/MTA1/C3orf70/GPR157/DRD2/NAGLU/STAR/USP2/CRH/EGR2/CHRNB2/MTNR1B/ZFHX3/DRD3/GHRL/AHCY/ADA/TH/SRD5A1/PER3/NCOR1/MC3R/GHRH/ADRB1/NLGN1/NR1D1/EGR1 |
| GOBP_CELLULAR_RESPONSE_TO_STEROL | GOBP_CELLULAR_RESPONSE_TO_STEROL | 20 | 0.738734838 | 2.181442208 | 4.34E-05 | 0.001277792 | 0.000984305 | 1318 | tags=40%, list=8%, signal=37% | CYP7A1/HMGCS1/GRAMD1C/GPLD1/SMO/RORC/INHBA/AACS |
| GOBP_NEPHRON_DEVELOPMENT | GOBP_NEPHRON_DEVELOPMENT | 137 | -0.421203987 | -1.818763855 | 4.34E-05 | 0.001277792 | 0.000984305 | 2861 | tags=36%, list=18%, signal=29% | FOXJ1/POU3F3/LHX1/TCF21/FGF8/PTCH1/YAP1/CD34/WWTR1/ADIPOQ/ANGPT2/SOX8/NOG/WNK4/HOXA11/MAGI2/WNT7B/HES1/GLI3/ASXL1/GZF1/CITED1/PDGFB/SIX4/TFAP2B/ACTA2/NID1/SULF1/COL4A4/BMP2/JAG1/VEGFA/GATA3/COL4A3/HES5/PODXL/IRX2/ADAMTS16/WT1/GPR4/NPHS1/FOXC2/OSR1/IRX3/TACSTD2/LIF/FOXC1/MYC/EGR1 |
| GOBP_REGULATION_OF_MUSCLE_CONTRACTION | GOBP_REGULATION_OF_MUSCLE_CONTRACTION | 143 | -0.411338159 | -1.787004252 | 4.36E-05 | 0.001277792 | 0.000984305 | 3557 | tags=36%, list=23%, signal=28% | MYOCD/ITGA2/CHGA/SCN10A/DSP/SSTR2/ATP1B1/TACR1/NKX2-5/NPPA/ENO1/ATP1A1/OXTR/CHRNA3/DMPK/GHRL/JUP/SCN5A/ADA/RYR2/CAV1/CASQ2/SLC9A1/TBXA2R/TRPM4/PDE4B/HSPB6/SLC8A3/KCNB2/KCNA1/ATP1A2/SPHK1/GHSR/PDE4D/ANK2/ATP2A1/NOS1/GATA4/ADRB2/MYL9/HCN4/P2RX1/SRF/CALCA/STC1/CNN1/EDN1/RGS2/MYBPH/PROK2/ZC3H12A |
| GOBP_MESENCHYME_DEVELOPMENT | GOBP_MESENCHYME_DEVELOPMENT | 261 | -0.354114704 | -1.68386394 | 4.41E-05 | 0.001286944 | 0.000991355 | 2496 | tags=25%, list=16%, signal=21% | SEMA6A/SEMA3C/NKX2-1/SPRED1/SEMA6C/ACVR1/SOX8/HEY1/NOG/TCF15/HOXA5/TBX5/TGFB2/HES1/FGF10/RADIL/SEMA3D/RBM24/SPRY1/DLL3/PHACTR4/WNT3A/SEMA4F/AKNA/SEMA3B/AMELX/TGFBR2/SIX4/SEMA3A/ZNF750/PDPN/ACTA2/BMP2/JAG1/TGFB1/SPRED2/GATA3/HAND1/TGFBR3/SEMA4A/PHLDB1/SMAD3/PHOX2B/SPRY2/TCF7L2/NOS3/WT1/GATA4/SOX11/FGFR1/TEAD2/FOXC2/SEMA4B/OSR1/MSX1/EDN3/HAS2/DAND5/IL1B/EDN1/TGFB3/FOXC1/ACTG2/MYC/IL6 |
| GOBP_NEGATIVE_REGULATION_OF_CHROMOSOME_ORGANIZATION | GOBP_NEGATIVE_REGULATION_OF_CHROMOSOME_ORGANIZATION | 77 | 0.500844157 | 2.005900551 | 4.45E-05 | 0.001293042 | 0.000996053 | 3516 | tags=45%, list=23%, signal=35% | TOP2A/NDC80/CDK5RAP2/PTTG1/MAD2L1/ZWINT/BUB1/MCM2/GEN1/IK/AURKB/CDT1/APC/KLHL22/TRIP13/ESPL1/MAD2L2/KNTC1/XRCC3/DCP2/TNKS/DYNC1LI1/MNAT1/ATRX/CDC20/BUB3/SMG6/PSMG2/POT1/ERCC4/XRCC1/LCMT1/HNRNPA1/ATM/XRN1 |
| GOBP_COPII_COATED_VESICLE_BUDDING | GOBP_COPII_COATED_VESICLE_BUDDING | 68 | 0.490137152 | 1.8968901 | 4.52E-05 | 0.001307454 | 0.001007154 | 4208 | tags=53%, list=27%, signal=39% | KLHL12/SCFD1/TRAPPC6B/MIA3/TRAPPC6A/F8/GOLGA2/TFG/SEC13/BET1/TMED10/SEC23B/NSF/SEC24A/SEC24D/SEC23A/CTSZ/GOSR2/TRAPPC2/LMAN1/SEC31A/TMED2/CTSC/SEC16B/SAR1B/MCFD2/TRAPPC3/SAR1A/TBC1D20/SEC24C/STX5/SEC31B/USO1/TRAPPC2L/SEC24B/VAPB |
| GOBP_ADENYLATE_CYCLASE_MODULATING_G_PROTEIN_COUPLED_RECEPTOR_SIGNALING_PATHWAY | GOBP_ADENYLATE_CYCLASE_MODULATING_G_PROTEIN_COUPLED_RECEPTOR_SIGNALING_PATHWAY | 199 | -0.375935751 | -1.731536961 | 4.75E-05 | 0.001364815 | 0.001051341 | 2241 | tags=27%, list=14%, signal=23% | VIP/AKAP13/ADRA1D/GCGR/S1PR1/ADCY4/LPAR2/MC2R/UCN3/GRIK3/WASF2/DRD5/TBXA2R/GRM7/FFAR3/SLC9A3R1/FPR2/ADCY5/MC3R/ADCY3/CRHR2/PDE4B/GHRH/CHRM1/GPR12/GRM4/APLP1/ADRB1/ADRB3/INSL3/GRM3/CHRM5/GNA11/PDE4D/GPR37L1/ATP2B4/GNAT1/ADM/ADRB2/GPR4/GPR3/S1PR2/GNA15/AKAP12/ADCYAP1/FPR1/RGS1/PTGER2/CALCA/LPAR1/RAMP1/EDN1/RGS2 |
| GOBP_DNA_CONFORMATION_CHANGE | GOBP_DNA_CONFORMATION_CHANGE | 243 | 0.349776764 | 1.662033582 | 4.78E-05 | 0.001364815 | 0.001051341 | 4644 | tags=44%, list=30%, signal=32% | NCAPG2/NUSAP1/TOP2A/MCM5/ITGB3BP/ASF1A/XPA/CETN2/ZRANB3/CENPQ/ATF7IP/SMC2/CHAF1A/MCM6/MCM2/CENPK/SMC4/GTF2H5/NCAPD2/DAXX/RUVBL2/RFC3/OIP5/NCAPG/SMARCAD1/HELLS/RBBP4/HHEX/HMGB3/SMARCAL1/GTF2H3/ZNF304/FAM172A/ASCC3/ERCC8/ERCC6/CTCF/DDB2/NPM1/CHTF8/RBX1/CENPH/RFC5/CHAF1B/HJURP/RBBP7/NAP1L3/SART3/NAP1L1/MNAT1/CENPM/ATRX/RECQL/AIFM1/CENPL/LIN54/SUV39H1/RFC4/DFFB/HMGB2/CHTF18/RUVBL1/POT1/CENPN/XRCC5/INCENP/CHMP1A/ASF1B/TOP1MT/NCAPD3/RNF8/SMYD3/NAP1L4/DSCC1/RSF1/MCPH1/SETX/MPHOSPH8/DDX11/MCM8/SSBP1/CHD1L/RPS27A/SRPK1/MCM4/ERCC3/FANCM/CENPI/CHD4/HELQ/RPA1/RAD50/GTF2F2/RAD54B/CDCA5/SETDB2/HP1BP3/TTN/DNMT3A/NAP1L5/RECQL4/DHX9/DDX1/RAD54L/GTF2H4/HAT1/MCM9/MCM3 |
| GOBP_CELL_CELL_ADHESION_VIA_PLASMA_MEMBRANE_ADHESION_MOLECULES | GOBP_CELL_CELL_ADHESION_VIA_PLASMA_MEMBRANE_ADHESION_MOLECULES | 211 | -0.371051477 | -1.726096208 | 4.79E-05 | 0.001364815 | 0.001051341 | 2695 | tags=27%, list=17%, signal=23% | PALLD/PCDHB2/IGSF11/ADIPOQ/CDH26/CELSR2/ACVR1/PTPRT/PCDH8/SDK1/CLSTN2/CEACAM6/CBLN1/TGFB2/SLITRK1/NPTN/PCDHB12/PCDH11X/MYPN/SELL/CDH8/SDK2/AMIGO3/FXYD5/PCDHB9/CX3CL1/PTPRD/TGFBR2/CDH23/CDH16/ESAM/PCDH1/PVR/FGFRL1/CDH12/BMP2/CDH18/UNC5D/IL1RAP/CEACAM1/NLGN1/CLDN2/CDH13/FLRT3/SLITRK2/CDH10/CDH19/MYADM/LRFN5/ICAM1/MAG/CDH4/IL10/IL1RN/PCDH20/KLF4/SLITRK3 |
| GOBP_REGULATION_OF_TUBE_SIZE | GOBP_REGULATION_OF_TUBE_SIZE | 118 | -0.448467074 | -1.89298258 | 4.80E-05 | 0.001364815 | 0.001051341 | 3343 | tags=41%, list=21%, signal=32% | AKT1/ACE/FGG/GCLM/NPPA/SMTNL2/FGA/EGFR/OXTR/SOD2/HRH2/P2RY1/KCNMB4/GCH1/CAV1/ADRA1D/AGTR1/KEL/SLC6A4/DBH/DRD5/TBXA2R/TRPM4/AVPR1A/ECE1/ACTA2/ADRB1/LEP/KLF2/ATP1A2/ADRB3/CRP/KCNA5/NOS1/GJA1/PER2/NOS3/ADM/ADRB2/ICAM1/FOXC2/P2RX1/EDN3/CALCA/EDN1/RGS2/SCNN1B/FOXC1 |
| GOBP_NEGATIVE_REGULATION_OF_CELL_CELL_ADHESION | GOBP_NEGATIVE_REGULATION_OF_CELL_CELL_ADHESION | 166 | -0.38034887 | -1.69825171 | 4.87E-05 | 0.00137956 | 0.001062699 | 2018 | tags=22%, list=13%, signal=19% | GLI3/NRARP/CTLA4/BMP6/LRRC32/CCL25/AKNA/FXYD5/PLA2G2D/BMP2/JAG1/LILRB2/TGFB1/MUC21/VEGFA/CCL21/CEACAM1/IRF1/JAK3/PODXL/CD274/MYADM/DTX1/CD9/ARG2/SCGB1A1/IL10/PELI1/IL1RN/TNR/SDC4/KLF4/BCL6/IL4R/SOCS1/ZC3H12A |
| GOBP_RHYTHMIC_PROCESS | GOBP_RHYTHMIC_PROCESS | 275 | -0.342858259 | -1.640960785 | 4.97E-05 | 0.001397371 | 0.001076419 | 2959 | tags=29%, list=19%, signal=24% | OXTR/JUND/CHRNB2/ATF4/DDX5/MYBBP1A/MTNR1B/HNRNPU/ASS1/NTRK1/PTPRN/ZFHX3/CRY1/DRD3/EREG/RPE65/CSNK1D/NCOA1/RAI1/SIRT1/NFKB2/ADIPOQ/SIN3A/GHRL/MSTN/AHCY/PIWIL2/NKX2-1/CARTPT/OPN4/ID1/ADA/TH/SRD5A1/ARNTL2/RETN/TGFB2/SLC6A4/SOX14/SLIT3/PER3/GPR149/NCOR1/RELB/ZPBP2/MC3R/CSNK1E/TPH2/PROX1/GHRH/KLF9/NFIL3/CPT1A/ADRB1/LEP/NTRK2/TIMP4/KLF10/NLGN1/GNA11/PROK1/PER2/MMP19/TYRO3/PASD1/GABRB1/NAMPT/EGR3/JUN/HAS2/ID4/PPARGC1A/NR1D1/TGFB3/PTX3/PROK2/SIK1/SERPINE1/ADAMTS1/EGR1 |
| GOBP_REGULATION_OF_ASTROCYTE_DIFFERENTIATION | GOBP_REGULATION_OF_ASTROCYTE_DIFFERENTIATION | 21 | -0.706833448 | -2.086796092 | 4.98E-05 | 0.001397371 | 0.001076419 | 1504 | tags=57%, list=10%, signal=52% | NOG/HES1/TTBK1/BMP2/HES5/GPR37L1/MAG/LDLR/NR1D1/LIF/CLCF1/IL6 |
| GOBP_WOUND_HEALING | GOBP_WOUND_HEALING | 471 | -0.29872597 | -1.513541968 | 5.08E-05 | 0.001419736 | 0.001093647 | 2086 | tags=18%, list=13%, signal=16% | TGFB2/SLC12A2/FZD6/GLI3/PLSCR1/FGF10/SERPINA1/IFNA14/RAC1/VCL/WNT3A/DRD5/DGKE/TBXA2R/IL24/RAB27A/ARHGEF19/IFNA8/NFE2L2/REG3G/FZD7/PEAR1/ODAM/CXCR4/PRKCQ/PDGFB/TGFBR2/PDPN/F3/IL1A/TSKU/TGFB1/KRT6A/LOX/PRTN3/DUSP10/VEGFA/GATA3/IGF1/INSL3/CEACAM1/IRF1/FBLN1/GNA11/GATA6/TNFAIP3/HGFAC/S100A8/SMAD3/PLAT/SPRR3/ITPR1/GJA1/CDKN1A/NOS3/SAA1/GATA4/GPR4/VWF/MYL9/TYRO3/GNA15/CD9/FOXC2/P2RX1/SRF/PLAUR/SLC11A1/B4GALT1/TNFRSF12A/SERPINB2/MCAM/THBD/MAFF/EDN1/HBEGF/SDC4/THBS1/NFE2/TGFB3/SERPINE1/VIL1/IL6 |
| GOCC_CIS_GOLGI_NETWORK | GOCC_CIS_GOLGI_NETWORK | 44 | 0.583186922 | 2.049729565 | 5.32E-05 | 0.001480543 | 0.001140488 | 4367 | tags=68%, list=28%, signal=49% | KDELR3/SCFD1/GOSR1/TRIP11/TRAPPC6B/TRAPPC6A/PIK3R1/GOLGA2/MPPE1/TMED10/PHTF1/RAB30/GOLIM4/LRPAP1/COPZ2/FKTN/UBXN2A/GBF1/ANGEL1/TRAPPC3/YIPF6/KDELR2/BOK/IFT20/COG3/GOLGB1/BCL9/MAN2A1/HOOK3/AKAP9 |
| GOCC_MICROBODY_MEMBRANE | GOCC_MICROBODY_MEMBRANE | 54 | 0.542089388 | 1.998745308 | 5.45E-05 | 0.001509603 | 0.001162873 | 3574 | tags=50%, list=23%, signal=39% | FNDC5/DAO/ACBD5/MGST1/PEX3/TMEM135/FIS1/SYT7/FAR2/PEX12/ABCD2/PEX11B/HMGCR/TTC1/PEX14/ABCD3/GNPAT/PEX5/PEX1/PEX7/PECR/PEX11A/AGPS/ALDH3A2/PXMP4/PEX16/CAT |
| GOBP_TRANSLATIONAL_INITIATION | GOBP_TRANSLATIONAL_INITIATION | 174 | 0.378015564 | 1.721372326 | 5.52E-05 | 0.001518932 | 0.00117006 | 4558 | tags=43%, list=29%, signal=30% | RPS4Y1/EIF1AY/RPS21/CCL5/CDC123/MCTS1/RPL7A/RPS26/IMPACT/RPSA/POLR2G/EIF4E2/RPS7/PPP1CA/RPL26/COPS5/CSDE1/EIF2B3/RPL23A/RPL37/RPL7/EIF3F/RPL35A/EIF2AK2/RPL13A/MTIF3/NPM1/EIF3H/RPS23/RPS29/RPL8/RPL15/DNAJC3/YTHDF3/RPLP0/RPL34/NCK1/RPL17/RPS3A/RPL41/DHX33/TMED2/EIF2AK3/RPS2/EIF4EBP1/BANK1/RPL29/NCBP2/MIF4GD/RPL9/METTL3/RPL11/RPS15A/RPL3/DHX29/EIF1AX/RPL21/UHMK1/RPS27A/RPS3/RPL31/RPS9/RPL27A/EIF4E3/EIF2S2/RPS24/RPS12/EIF3M/RPS8/DDX1/EIF2B1/EIF4G3/NCBP1/RPL23 |
| GOBP_LIPID_CATABOLIC_PROCESS | GOBP_LIPID_CATABOLIC_PROCESS | 304 | 0.328759585 | 1.591226198 | 5.55E-05 | 0.001518932 | 0.00117006 | 3182 | tags=28%, list=20%, signal=23% | CYP7A1/AKR1B10/FABP4/SPP1/LPL/FABP5/FGF21/PLA2G7/AMACR/ACBD5/PLA2G1B/CYP39A1/SULT1E1/PNPLA3/AOAH/PLCD1/GPLD1/IDH1/PLA2G12B/PLD6/PRKCE/ECHDC1/DDHD1/NAPEPLD/SULT2A1/ACADL/HSD11B1/GDE1/PLCG1/HADH/ANGPTL3/ACOT8/ACAA1/HAO1/PLCB3/BDH2/HEXA/GM2A/NUDT7/PHYH/LIPA/CYP26A1/IRS1/SCP2/DECR1/APOA5/HACL1/ACADM/PCCB/PNPLA4/ABCD2/AUH/SGPL1/CYP4F2/PLD1/PLA2G4A/FUCA1/AKR1D1/ENPP7/ABHD1/GDPD1/CROT/EHHADH/ABCD3/HSD17B10/TYSND1/GLA/PAFAH2/CES3/PPT1/PLA2G4C/CPT1B/PEX7/PDXDC1/ETFA/ACAT2/PECR/MCEE/ASAH1/APOC1/HEXB/ENPP2/RARRES2/ABHD12/ALDH3A2 |
| GOBP_REGULATION_OF_FAT_CELL_DIFFERENTIATION | GOBP_REGULATION_OF_FAT_CELL_DIFFERENTIATION | 115 | -0.425401018 | -1.797656339 | 5.55E-05 | 0.001518932 | 0.00117006 | 2930 | tags=33%, list=19%, signal=27% | ALOX5/HNRNPU/ZNF385A/YAP1/WWTR1/SIRT1/ADIPOQ/CEBPB/VSTM2A/HES1/ASXL1/TRIO/WNT3A/TRPM4/TRIB2/LMO3/ZBTB7C/BMP2/JAG1/TGFB1/LEP/DUSP10/METRNL/GATA3/LRP5/ZFP36L2/GDF3/SMAD3/C1QL4/CDS1/NR1D1/FOXO1/PIM1/KLF5/PTGS2/ZFP36/ZC3H12A/IL6 |
| GOBP_CELLULAR_LIPID_CATABOLIC_PROCESS | GOBP_CELLULAR_LIPID_CATABOLIC_PROCESS | 208 | 0.358228609 | 1.676643822 | 5.61E-05 | 0.001524221 | 0.001174134 | 3820 | tags=37%, list=25%, signal=28% | AKR1B10/FABP4/LPL/FABP5/FGF21/PLA2G7/AMACR/ACBD5/PNPLA3/AOAH/GPLD1/IDH1/ECHDC1/NAPEPLD/ACADL/GDE1/PLCG1/HADH/ANGPTL3/ACOT8/ACAA1/HAO1/BDH2/HEXA/GM2A/NUDT7/PHYH/CYP26A1/IRS1/SCP2/DECR1/APOA5/HACL1/ACADM/PCCB/PNPLA4/ABCD2/AUH/SGPL1/PLA2G4A/FUCA1/ENPP7/ABHD1/GDPD1/CROT/EHHADH/ABCD3/HSD17B10/TYSND1/GLA/PPT1/PLA2G4C/CPT1B/PEX7/PDXDC1/ETFA/ACAT2/PECR/MCEE/ASAH1/APOC1/HEXB/ENPP2/ABHD12/ALDH3A2/ACAT1/IVD/ACOX2/HADHB/ACAD10/DAGLB/ECH1/NEU1/PIK3CG/ACER3/GBA3 |
| GOBP_ATP_SYNTHESIS_COUPLED_ELECTRON_TRANSPORT | GOBP_ATP_SYNTHESIS_COUPLED_ELECTRON_TRANSPORT | 78 | 0.503620165 | 2.018749814 | 5.62E-05 | 0.001524221 | 0.001174134 | 5805 | tags=67%, list=37%, signal=42% | COX15/NDUFAF1/NDUFA5/NDUFS4/NDUFA6/DLD/NDUFB2/NDUFB1/NDUFB4/NDUFA10/COX7A2L/NDUFA9/NDUFB6/UQCRB/UQCRQ/NDUFV1/UQCRC2/COX6C/PARK7/SDHA/NDUFA11/NDUFB10/DGUOK/COX6B1/NDUFC1/ISCU/NDUFAB1/NDUFB3/NDUFA12/COX6A1/UQCRC1/SDHD/NDUFB5/NDUFS2/SDHC/NDUFA1/NDUFS5/COX4I1/BID/NDUFS8/NDUFS7/COX5B/NDUFB11/PINK1/NDUFA8/NDUFA2/NDUFV2/NDUFA7/NDUFC2/NDUFB7/DNAJC15/NDUFA3 |
| GOBP_MITOCHONDRIAL_ELECTRON_TRANSPORT_NADH_TO_UBIQUINONE | GOBP_MITOCHONDRIAL_ELECTRON_TRANSPORT_NADH_TO_UBIQUINONE | 46 | 0.567468275 | 1.996955699 | 5.75E-05 | 0.001553411 | 0.001196619 | 5805 | tags=78%, list=37%, signal=49% | NDUFAF1/NDUFA5/NDUFS4/NDUFA6/DLD/NDUFB2/NDUFB1/NDUFB4/NDUFA10/NDUFA9/NDUFB6/NDUFV1/PARK7/NDUFA11/NDUFB10/NDUFC1/ISCU/NDUFAB1/NDUFB3/NDUFA12/NDUFB5/NDUFS2/NDUFA1/NDUFS5/NDUFS8/NDUFS7/NDUFB11/PINK1/NDUFA8/NDUFA2/NDUFV2/NDUFA7/NDUFC2/NDUFB7/DNAJC15/NDUFA3 |
| GOCC_GLUTAMATERGIC_SYNAPSE | GOCC_GLUTAMATERGIC_SYNAPSE | 285 | -0.336109245 | -1.617810524 | 5.84E-05 | 0.001571434 | 0.001210503 | 2757 | tags=26%, list=18%, signal=22% | BSN/DRD3/ACTB/SLITRK4/HTR3A/ITSN1/GHRL/RELA/SLC30A3/CACNG5/P2RY1/STX1A/PTPRT/PCDH8/CLSTN2/ARC/P2RY4/DBN1/RGS14/CBLN1/SLITRK1/NPTN/GRIK3/RAC1/ACTN1/WNT3A/DGKE/CDH8/PPP2R2A/ERC2/ACTBL2/APBA1/EFNB2/ABLIM3/SLC6A17/GRIK5/DRP2/LRRTM2/PTPRD/NLGN3/PLCB1/LRRTM1/NPTX1/CHRM1/DLGAP4/GRID1/GSG1L/SV2A/GABRR1/KCNA1/IL1RAP/CADPS/GRM3/GHSR/NLGN1/FLRT3/CACNG3/ATP2B4/SLITRK2/PPFIA2/SLC4A8/CALY/CDH10/NPTX2/HPCA/CACNG7/LRFN5/HOMER1/NOS1AP/CPLX1/CACNG2/P2RX1/CPT1C/TNR/TNIK |
| GOCC_PEPTIDASE_COMPLEX | GOCC_PEPTIDASE_COMPLEX | 81 | 0.482011321 | 1.95392054 | 5.89E-05 | 0.001572368 | 0.001211222 | 4925 | tags=56%, list=32%, signal=38% | PSMD10/FAP/SPCS2/TAF12/PSMB9/PSMA2/PIGK/PSMB7/IDE/PSME2/PAAF1/PSMD14/PSMA4/PSMD4/PSMD7/PSMD1/PSMA3/PSMD13/PSMD11/SPCS3/F7/ZFAND2B/PSMA1/PSMB10/PSMC6/PSMB5/SEC11A/PSMC4/HTRA2/PSMC3/PSME1/VCP/PSMB1/PSMD2/PSMA5/UBR1/SEC11C/PSMC5/PSMB8/PIGU/PSMB4/GPAA1/TADA3/HSPB1/PSMD6 |
| GOBP_INTRA_GOLGI_VESICLE_MEDIATED_TRANSPORT | GOBP_INTRA_GOLGI_VESICLE_MEDIATED_TRANSPORT | 27 | 0.652577294 | 2.085424256 | 5.90E-05 | 0.001572368 | 0.001211222 | 3694 | tags=63%, list=24%, signal=48% | GOSR1/COG5/VTI1B/NAPG/COPZ1/NSF/RAB33B/COG6/GOSR2/COPB2/COPZ2/GABARAPL2/COG1/CUX1/COPB1/TRAPPC3/COG3 |
| GOBP_VESICLE_TARGETING_TO_FROM_OR_WITHIN_GOLGI | GOBP_VESICLE_TARGETING_TO_FROM_OR_WITHIN_GOLGI | 67 | 0.510169096 | 1.967930857 | 5.92E-05 | 0.001572368 | 0.001211222 | 4096 | tags=54%, list=26%, signal=40% | KLHL12/SCFD1/GOSR1/WIPI1/TRAPPC6B/TRAPPC6A/F8/GOLGA2/TFG/SEC13/BET1/TMED10/NSF/SEC24A/SEC24D/SEC23A/CTSZ/GOSR2/TRAPPC2/LMAN1/SEC31A/TMED2/CTSC/GBF1/SEC16B/SAR1B/ARFGAP2/MCFD2/TRAPPC3/SAR1A/TBC1D20/SEC24C/STX5/USO1/TRAPPC2L/SEC24B |
| GOBP_SKELETAL_MUSCLE_CELL_DIFFERENTIATION | GOBP_SKELETAL_MUSCLE_CELL_DIFFERENTIATION | 58 | -0.525074079 | -1.967492012 | 5.97E-05 | 0.001576967 | 0.001214765 | 2536 | tags=33%, list=16%, signal=28% | MSTN/SOX8/VAX1/SAP30/SMYD1/RBM24/WNT3A/PAX5/AKIRIN1/EPHB1/SIX4/BTG2/PHOX2B/ATF3/SOX11/MAFF/KLF5/FOS/EGR1 |
| GOBP_POSITIVE_REGULATION_OF_VASCULATURE_DEVELOPMENT | GOBP_POSITIVE_REGULATION_OF_VASCULATURE_DEVELOPMENT | 139 | -0.401644808 | -1.742662101 | 5.98E-05 | 0.001576967 | 0.001214765 | 2791 | tags=29%, list=18%, signal=24% | ISL1/CD34/SIRT1/ABL1/GHRL/ANGPT2/JUP/ITGAX/ANXA3/HMOX1/CCL11/TBXA2R/NFE2L2/PGF/CXCR4/TGFBR2/HSPB6/HIPK2/F3/IL1A/VEGFA/SPHK1/GHSR/GATA6/ANGPTL4/NOS3/VEGFC/ADM/GATA4/C5AR1/ANGPT4/RHOB/FOXC2/ITGB8/IL10/LRG1/IL1B/THBS1/KLF4/SERPINE1/ZC3H12A |
| GOCC_POSTSYNAPTIC_SPECIALIZATION_MEMBRANE | GOCC_POSTSYNAPTIC_SPECIALIZATION_MEMBRANE | 99 | -0.441486141 | -1.801388521 | 6.01E-05 | 0.00157698 | 0.001214775 | 4803 | tags=51%, list=31%, signal=35% | PRRT2/LRRC4B/CHRNA1/CACNA1C/CNKSR2/KCND3/CACNG8/PRR7/KCND2/SEMA4C/HTR5A/ACTN2/GRIN2C/DLG4/LRFN2/SLC16A3/PTPRS/TIAM1/GPHN/ADAM22/CHRNA9/GRIN2D/DRD3/GRIA2/DAGLA/CACNG5/PTPRT/CLSTN2/ARC/SLITRK1/NPTN/GABRA5/SLC30A1/GLRA1/GRIK5/GABRB2/LRRTM2/LRRTM1/CHRM1/GRID1/GSG1L/NLGN1/DCC/CACNG3/CHRNA10/CDH10/CACNG7/LRFN5/CACNG2/SLITRK3 |
| GOCC_ENDOPEPTIDASE_COMPLEX | GOCC_ENDOPEPTIDASE_COMPLEX | 66 | 0.491981302 | 1.893509547 | 6.10E-05 | 0.001592092 | 0.001226416 | 4925 | tags=56%, list=32%, signal=38% | PSMD10/PSMB9/PSMA2/PIGK/PSMB7/IDE/PSME2/PAAF1/PSMD14/PSMA4/PSMD4/PSMD7/PSMD1/PSMA3/PSMD13/PSMD11/ZFAND2B/PSMA1/PSMB10/PSMC6/PSMB5/PSMC4/HTRA2/PSMC3/PSME1/VCP/PSMB1/PSMD2/PSMA5/UBR1/PSMC5/PSMB8/PIGU/PSMB4/GPAA1/HSPB1/PSMD6 |
| GOBP_POSITIVE_REGULATION_OF_CELL_ADHESION | GOBP_POSITIVE_REGULATION_OF_CELL_ADHESION | 399 | -0.309835863 | -1.542437976 | 6.11E-05 | 0.001592092 | 0.001226416 | 2934 | tags=24%, list=19%, signal=20% | IFNG/ALOX5/PDCD1/MYOC/PCK1/TNFSF11/CD276/SOX2/FOXA2/ZFHX3/COL16A1/DUSP26/AGR2/ABL1/HHLA2/ITPKB/RELA/IL12A/JUP/TNFSF9/ADA/CAV1/CEACAM6/TGFB2/ZMIZ1/HES1/GLI3/IL23R/IRAK1/CTLA4/RAC1/COL8A1/WNT3A/ADAM19/CCL25/CSF1/CX3CL1/TFRC/PRKCQ/PDGFB/TGFBR2/CCR7/AZU1/RHOD/NOD2/PDPN/IL1A/NID1/FUT3/LILRB2/LEP/TGM2/VWC2/DUSP10/VEGFA/GATA3/IGF1/CCL21/CDH13/FLOT2/JAK3/PODXL/SMAD3/NEDD9/EBI3/CXCL13/EPO/TNFRSF13C/CD274/SIRPA/EGFLAM/MYADM/SAA1/CSK/TNFSF14/SIRPB1/ICAM1/NR4A3/CHRD/FOXC2/CASS4/PLAUR/SLC7A1/EGR3/IL10/HAS2/MAP3K8/IL1B/SDC4/NFKBIZ/LIF/BCL6/IL4R/CCL2/IGFBP2/SOCS1/IL6 |
| GOBP_OSSIFICATION | GOBP_OSSIFICATION | 361 | -0.316453035 | -1.559855032 | 6.33E-05 | 0.001642865 | 0.001265527 | 3175 | tags=29%, list=20%, signal=23% | EGR2/BMP3/MMP9/ITGA11/FBXO5/FGR/WNT10B/EGFR/BAMBI/SKI/JUND/ALOX5/ATF4/MYOC/DDX5/TNFSF11/MYBBP1A/STATH/HNRNPU/SOX2/PTCH1/YAP1/RRBP1/INPPL1/OSTN/NPPC/WWTR1/FBN2/HEMGN/CEBPB/CRIM1/ACVR1/SOX8/NOG/TFAP2A/S1PR1/PHEX/TGFB2/WNT7B/ATP6V0A4/IFITM5/DKK1/GLI3/SLC24A3/COL6A1/BMP6/WNT3A/TRPM4/CSF1/TUFT1/CITED1/MN1/TP53INP2/AMELX/ATP6V1B1/TNN/SMOC1/NELL1/CLEC5A/CYP24A1/CSGALNACT1/BMP2/JAG1/TGFB1/LEP/BCOR/MMP2/LOX/IGF1/KLF10/MGP/LRP5/PENK/GPM6B/CHRDL1/SMAD3/CHRDL2/ALPL/CYP27B1/CHSY1/VEGFC/TAC1/VCAN/ADRB2/CCL3/SOX11/WNT3/SGMS2/CHRD/FOXC2/OSR1/KL/GDF5/ACVR2B/SBNO2/CALCA/STC1/LRP4/TGFB3/FOXC1/EPHA2/JUNB/IL6 |
| GOBP_ACTION_POTENTIAL | GOBP_ACTION_POTENTIAL | 127 | -0.415603102 | -1.772092876 | 6.57E-05 | 0.001698072 | 0.001308054 | 3423 | tags=37%, list=22%, signal=29% | KCNN2/SCN10A/DSP/ATP1B1/SCN2A/CLDN19/HCN2/ATP1A1/CHRNB2/NTSR1/MTNR1B/CACNA2D1/CNTNAP1/CACNA1I/CHRNA4/JUP/SCN5A/KCNMB4/PTPN3/RYR2/CAV1/SCN2B/CACNA1G/KCNC2/SLC9A1/SCN3B/TRPM4/GLRA1/GJC1/SCN1A/NTRK2/KCNA1/SCN9A/ATP1A2/GPR88/GNA11/KCNA5/ANK2/GJA1/KCNE4/TAC1/NOS1AP/GNA15/SCN7A/HCN4/P2RX1/SLC8A2 |
| GOBP_LEUKOCYTE_DIFFERENTIATION | GOBP_LEUKOCYTE_DIFFERENTIATION | 489 | -0.295739121 | -1.505058137 | 6.70E-05 | 0.001717193 | 0.001322783 | 2080 | tags=17%, list=13%, signal=15% | AIRE/ZMIZ1/GLI3/NRARP/IL23R/TOX/IRF8/CTLA4/TSPAN2/IFNA14/STAT3/IL18R1/CSF1/IRF4/PRDM1/PGLYRP3/IFNA8/RELB/PLA2G2D/FZD7/TFRC/POU2AF1/TGFBR2/CEBPE/CCR7/NFATC2/IL11/FLT3/SH3PXD2A/IL1A/LILRB2/TGFB1/POU4F2/LEP/PRTN3/DUSP10/FOXP1/VEGFA/GATA3/LILRB3/CEACAM1/SPINK5/KLF10/IRF1/BLNK/SEMA4A/JAK3/ZFP36L2/LTBR/PSMB11/TRIB1/LEPR/POU4F1/RAG2/CSF3/PLA2G3/IL20/CCL3/TYRO3/DTX1/SRF/ITGB8/EGR3/IL10/JUN/CD19/BATF3/SBNO2/IL1B/KLF6/NFKBIZ/LIF/CLCF1/BCL6/IL4R/BCL3/EPHA2/SOCS1/MYC/ZC3H12A/JUNB/FOS/EGR1/IL6 |
| GOBP_PROTEIN_LOCALIZATION_TO_CHROMOSOME | GOBP_PROTEIN_LOCALIZATION_TO_CHROMOSOME | 71 | 0.489381878 | 1.909512609 | 6.72E-05 | 0.001717193 | 0.001322783 | 4412 | tags=46%, list=28%, signal=33% | MSH2/HDAC8/NDC80/CENPQ/ESCO2/IK/ZWILCH/AURKB/MIS12/CCT3/CDT1/RUVBL2/CCT6A/CTCF/CCT7/XRCC4/ESR1/TNKS/RB1/ATRX/BUB3/POT1/XRCC5/ATM/VCP/PIH1D1/ZW10/MCM8/TCP1/RPA1/CDCA5/TNKS2/TTK |
| GOCC_COPII_COATED_ER_TO_GOLGI_TRANSPORT_VESICLE | GOCC_COPII_COATED_ER_TO_GOLGI_TRANSPORT_VESICLE | 84 | 0.472157203 | 1.933450045 | 6.73E-05 | 0.001717193 | 0.001322783 | 4129 | tags=54%, list=27%, signal=40% | KLHL12/PCSK9/STX17/HLA-DRB3/VTI1B/F8/LMAN2L/GOLGA2/SEC13/TMED10/SEC23B/YIF1B/SEC24A/SEC24D/LMAN2/YIPF5/SEC23A/CTSZ/GOSR2/HLA-F/LMAN1/CNIH4/SEC31A/ERGIC3/TMED2/CTSC/SREBF2/TMED1/HLA-A/SEC16B/SAR1B/B2M/ERGIC2/MCFD2/SAR1A/YIPF6/HLA-DPA1/SEC24C/TMED4/STX5/SEC31B/USO1/HLA-DQB1/SEC24B/HLA-B |
| GOCC_PRESYNAPTIC_MEMBRANE | GOCC_PRESYNAPTIC_MEMBRANE | 133 | -0.41724151 | -1.798274298 | 6.98E-05 | 0.001774897 | 0.001367234 | 3958 | tags=39%, list=25%, signal=29% | SLC6A3/ATP2B1/KCNA2/RIMS1/DRD2/RIMS2/SLC6A9/GABBR1/PTPRS/NRXN1/SCN2A/CNTN5/KCNC1/GRM2/CNTNAP1/HTR3A/SYP/ITSN1/GRIK4/P2RY1/STX1B/STX1A/PCDH8/SNAP91/P2RY4/NPTN/GABRA5/GRIK3/SLC6A4/KCNC2/KCTD16/ERC2/APBA1/EFNB2/GLRA1/GRIK5/PTPRD/CHRM1/SLC6A11/KCNA1/KCTD8/GRM3/KCNC3/ATP2B4/SLC4A8/STX11/CDH10/SNCAIP/P2RX1/CPLX3/GAD2/FOSL1 |
| GOBP_VESICLE_ORGANIZATION | GOBP_VESICLE_ORGANIZATION | 301 | 0.319096338 | 1.545316105 | 7.02E-05 | 0.001778745 | 0.001370198 | 4000 | tags=38%, list=26%, signal=29% | AKTIP/CHMP4A/FNBP1L/ZDHHC2/VPS8/KLHL12/SCFD1/SNX10/GOSR1/VPS41/TMEM9/TRAPPC6B/GOLPH3L/VPS37D/SAMD9/STX17/RAB8A/STX8/VPS11/MIA3/TRAPPC6A/VTI1B/F8/PIP4K2B/GOLGA2/STX7/CHMP5/TFG/SEC13/SNAP47/BET1/TMED10/SNAPIN/SEC23B/NSF/CHMP6/VAMP8/VAMP3/SEC24A/SEC24D/SYT7/CHMP2A/SEC23A/DNAJC13/CTSZ/STAM2/VPS25/GOSR2/TRAPPC2/VAV3/TAP2/VTA1/MYO7A/UVRAG/VPS39/LMAN1/STX2/RAB3A/VAMP1/SYT9/SEC31A/ZFYVE16/ANKRD27/RNF26/STX10/TAPBP/SDCBP/TRIM9/SNAP23/STX4/PI4K2B/TMED2/TMEM175/CAV2/CTSC/GBF1/TMF1/CALR/RAB32/MX1/VPS4B/SEC16B/SAR1B/ANXA2/PLEKHJ1/PDCD6IP/SYNJ1/VAMP4/ARFGAP2/CLCN3/MCFD2/SDC1/STX16/CHMP1A/UNC13B/FASLG/TRAPPC3/SAR1A/TBC1D20/PAFAH1B1/PRKCI/PI4K2A/STX19/SEC24C/STX5/SEC31B/EXOC8/USO1/CORO1A/TRAPPC2L/ATP13A2/AP3B1/SNX3/EEA1 |
| GOBP_DIVALENT_INORGANIC_CATION_HOMEOSTASIS | GOBP_DIVALENT_INORGANIC_CATION_HOMEOSTASIS | 457 | -0.29890042 | -1.514878066 | 7.52E-05 | 0.001898134 | 0.001462165 | 2959 | tags=28%, list=19%, signal=23% | OXTR/MT1G/S1PR4/CALB2/ATF4/FKBP1A/CHRNA9/NTSR1/CCL23/TNFSF11/MTNR1B/GLP1R/GRIN2D/TAC4/C1QTNF1/DRD3/SLC39A4/CACNA2D1/DMPK/TRPV3/ABL1/MT3/GHRL/HAP1/SLC30A3/P2RY1/MT2A/GPR17/PKHD1/TRPV6/FAM20A/CXCR1/JPH2/RYR2/P2RY4/CAV1/CASQ2/ADRA1D/S1PR1/LPAR2/NPTN/AGTR1/CCL11/MT1E/SLC24A3/TRPA1/KEL/CCL8/MT1F/CIB2/DRD5/TBXA2R/TRPM4/AVPR1A/CSRP3/SLC30A1/MT1X/FPR2/ADCY5/CX3CL1/CXCR4/CCR7/NPSR1/CDH23/SLC8A3/ATP6V1B1/TFAP2B/SLC30A8/GPR12/PDZD8/SV2A/TPCN1/ABL2/TGM2/KCNA1/GOT1/ATP1A2/DHRS7C/CCL21/TPCN2/S100A9/PDE4D/KCNA5/ANK2/TRPC1/S100A8/SLC24A4/CNGB1/SLC24A2/STC2/SMAD3/ATP2A1/ATP2B4/CXCL13/ITPR1/NOS1/EPO/CHRNA10/CYP27B1/GJA1/SAA1/ADM/TAC1/GPR4/C5AR1/CCL3/CCL7/GPR32/GNA15/TRPM1/ADCYAP1/P2RX1/FPR1/SLC11A1/KL/PTGER2/MT1M/CD19/EDN3/CALCA/STC1/LPAR1/SLC8A2/EDN1/MT1A/PROK2/MT1B |
| GOBP_CARDIAC_CONDUCTION | GOBP_CARDIAC_CONDUCTION | 142 | -0.405367865 | -1.762313614 | 7.59E-05 | 0.001908445 | 0.001470108 | 3423 | tags=37%, list=22%, signal=29% | KCNN2/KCNIP4/SCN10A/DSP/ATP1B1/STIM1/FXYD6/NKX2-5/NPPA/ATP1A1/ISL1/NPPC/CACNA2D1/DMPK/KCNJ12/JUP/CACNG5/SCN5A/CACNG1/KCNJ14/RYR2/CAV1/SCN2B/CASQ2/ATP1B3/CACNA1G/SPTBN4/SLC9A1/SCN3B/KCNH6/TRPM4/CACNG6/KCNIP1/GJC1/SLC8A3/ATP1B2/ATP1A2/PDE4D/KCNA5/ANK2/TRPC1/ATP2A1/CACNG3/ATP2B4/ITPR1/NOS1/GJA1/KCNE4/CACNG7/HCN4/CACNG2/SLC8A2/KCNK1 |
| GOMF_1_PHOSPHATIDYLINOSITOL_3_KINASE_REGULATOR_ACTIVITY | GOMF_1_PHOSPHATIDYLINOSITOL_3_KINASE_REGULATOR_ACTIVITY | 15 | -0.770666131 | -2.034794294 | 7.82E-05 | 0.001958251 | 0.001508474 | 107 | tags=27%, list=1%, signal=27% | CISH/SOCS3/SOCS2/SOCS1 |
| GOBP_DETECTION_OF_ABIOTIC_STIMULUS | GOBP_DETECTION_OF_ABIOTIC_STIMULUS | 130 | -0.408016931 | -1.751370116 | 7.99E-05 | 0.001991482 | 0.001534073 | 3704 | tags=40%, list=24%, signal=31% | GJA10/GNAQ/ITGA2/RGR/PDC/RHO/CABP4/GRK1/TACR1/CHRNA9/NTSR1/NTRK1/NOX3/ATP8A2/RPE65/KCNK4/JUP/PDE6A/OPN4/PKD1L3/TRPA1/PPEF1/PKD1L2/PDZD7/NPFFR2/CSRP3/RCVRN/NR2E3/CXCR4/PLEKHB1/EPHB1/PKD1L1/SCN1A/ELOVL4/KCNA1/GPR88/RP1/RGS9BP/STRC/AIPL1/GNA11/CNGB1/ROM1/CHRNA10/GRK7/GNAT1/TAC1/LHFPL5/PRDM12/SAG/CDS1/CALCA |
| GOBP_NEGATIVE_REGULATION_OF_MAP_KINASE_ACTIVITY | GOBP_NEGATIVE_REGULATION_OF_MAP_KINASE_ACTIVITY | 73 | -0.479874057 | -1.862783052 | 8.17E-05 | 0.002030897 | 0.001564435 | 3230 | tags=40%, list=21%, signal=32% | HIPK3/SMPD1/NPPA/DUSP7/CBLC/ADIPOQ/SPRY3/SPRED1/DUSP19/CAV1/RGS14/RGS4/PTPN1/SPRY1/DUSP1/DUSP16/DUSP9/HYAL2/DUSP21/SPRED2/DUSP10/IRAK3/DUSP5/SPRY2/DUSP8/DUSP6/IL1B/RGS2/SPRY4 |
| GOCC_MITOCHONDRIAL_LARGE_RIBOSOMAL_SUBUNIT | GOCC_MITOCHONDRIAL_LARGE_RIBOSOMAL_SUBUNIT | 53 | 0.538775463 | 1.975484233 | 8.27E-05 | 0.002045553 | 0.001575725 | 3823 | tags=49%, list=25%, signal=37% | MRPL35/C12orf65/NSUN3/MRPL45/MRPL19/MRPL20/MRPL33/MRPL40/MRPL28/MRPL30/MRPL47/MRPL18/MRPL13/MRPL48/MRPL52/MRPL14/NSUN4/MRPL17/MRPS18A/MRPL49/MRPL41/MRPL24/MRPL3/MRPL16/NDUFAB1/MRPL22 |
| GOBP_SIGNAL_RELEASE | GOBP_SIGNAL_RELEASE | 444 | -0.300997668 | -1.520611016 | 8.60E-05 | 0.002119523 | 0.001632705 | 3443 | tags=31%, list=22%, signal=25% | GPR119/GALR1/CHGA/FGF20/CHRNB4/PCSK5/NRXN1/FGG/TIAM1/TFR2/SLC16A1/CRH/CACNA1A/SYT4/ACVR1C/CACNA1E/SYN2/FGA/SLC32A1/EGFR/ABCA1/SYTL4/OXTR/SYN3/CHRNB2/IFNG/ALOX5/TNFSF11/MTNR1B/DOC2A/GLP1R/FOXA2/ISL1/CHRNA3/PTPRN/C1QTNF1/CRY1/ABCC8/DRD3/SLC5A7/ADIPOQ/SYP/ITSN1/GHRL/SSTR5/CHRNA4/P2RY1/KCNMB4/STX1B/CARTPT/G6PC2/STX1A/TRPV6/CCKAR/VIP/PPFIA4/P2RY4/SYT15/RETN/AGTR1/UCN3/SLC6A4/KCNC2/KALRN/RAC1/BMP6/GAD1/TRPM4/SLC30A1/CYP19A1/FFAR3/ERC2/DOC2B/KCNG2/APBA1/ADCY5/SLC44A4/NKX3-1/GRIK5/IL11/GHRH/TFAP2B/SLC30A8/GRM4/NAAA/SV2A/CPT1A/LEP/BRSK1/KCNS3/EFNA5/GATA3/CADPS/GHSR/SYT12/NLGN1/LRP5/KCNA5/PIP5K1C/SYN1/FFAR2/ITPR1/RPH3A/PPFIA2/SLC4A8/GJA1/PER2/STX11/RASL10B/TCF7L2/GPR27/ADM/TAC1/LTBP4/PLA2G3/PLA2G10/TRH/SNCAIP/SOX11/CPLX1/ADCYAP1/P2RX1/CPLX3/IL1RN/OSM/EDN3/IRS2/IL1B/INHBB/NR1D1/PIM3/EDN1/GAD2/LIF/MIDN/IL6 |
| GOBP_SENSORY_ORGAN_MORPHOGENESIS | GOBP_SENSORY_ORGAN_MORPHOGENESIS | 227 | -0.353367803 | -1.657660524 | 8.73E-05 | 0.002144944 | 0.001652288 | 3186 | tags=32%, list=20%, signal=26% | VSX1/CABP4/GJB6/LHX1/SKI/ATF4/CHRNA9/FOXE3/FOXI1/FGF8/OTX1/ATP8A2/RPE65/SIX3/FBN2/DIO3/SOX8/NOG/TFAP2A/FZD5/RDH13/SDK1/TH/SOX1/FZD6/GLI3/FGF10/USH1G/MYO3B/COL8A1/PHACTR4/MYO3A/PDZD7/WNT3A/STAT3/ATOH1/SLC9A3R1/SDK2/NR2E3/SLC44A4/PTF1A/PROX1/ATP6V1B1/SIX4/TFAP2B/HMX2/PRRX1/HIPK2/CRYGB/TSKU/JAG1/NTRK2/VEGFA/GATA3/RP1/STRC/LRP5/ROM1/CHRNA10/ALDH1A3/SPRY2/GNAT1/LHFPL5/MEGF11/SOX11/FJX1/OSR1/LRIG1/MSX1/POU4F3/EDN1/EPHA2 |
| GOBP_POSTREPLICATION_REPAIR | GOBP_POSTREPLICATION_REPAIR | 46 | 0.557195486 | 1.960805125 | 8.83E-05 | 0.002160598 | 0.001664346 | 4190 | tags=59%, list=27%, signal=43% | MSH2/ISG15/BRCA1/DTL/PCNA/RFC1/POLE2/POLD1/POLH/RFC3/POLK/POLI/MAD2L2/ZBTB1/RFC5/RPA3/RAD18/POLD2/RFC4/POLDIP2/VCP/NSMCE1/UBE2L6/POLD3/RPS27A/UBE2V2/RPA1 |
| GOMF_NAD_P_H_DEHYDROGENASE_QUINONE_ACTIVITY | GOMF_NAD_P_H_DEHYDROGENASE_QUINONE_ACTIVITY | 40 | 0.570650946 | 1.951855216 | 8.95E-05 | 0.002181368 | 0.001680345 | 6343 | tags=88%, list=41%, signal=52% | NDUFA5/NDUFS4/NDUFA6/NQO2/NDUFB2/NDUFB1/NDUFB4/NDUFA10/NDUFA9/NDUFB6/NDUFV1/CBR4/NQO1/NDUFB10/NDUFC1/NDUFAB1/NDUFB3/NDUFA12/NDUFB5/NDUFS2/NDUFA1/NDUFS5/NDUFS8/NDUFS7/NDUFA8/NDUFA2/NDUFV2/NDUFA7/NDUFC2/NDUFB7/NDUFA3/NDUFB8/NDUFS6/NDUFS1/NDUFAF2 |
| GOBP_GENERATION_OF_PRECURSOR_METABOLITES_AND_ENERGY | GOBP_GENERATION_OF_PRECURSOR_METABOLITES_AND_ENERGY | 444 | 0.296644261 | 1.502971154 | 9.02E-05 | 0.002190237 | 0.001687178 | 4020 | tags=34%, list=26%, signal=26% | ME1/PPP1R3C/ADH5/GCK/PRKAA2/MSH2/CEBPA/ENO3/SPHK2/NUPR1/COQ10A/AKR1A1/GPD1/ACSS3/P4HA2/STBD1/PPP1R3B/DMGDH/COX15/NHLRC1/FAHD1/NDUFAF1/ACSS2/DDIT4/IDH1/GPX2/QDPR/NDUFA5/PPIF/NDUFS4/NDUFA6/NQO2/DLD/IDE/SEC13/RBKS/GFPT1/CYB5B/TALDO1/NDUFB2/SUCLG2/POLG2/NDUFB1/PRKAG1/BDH2/NUP93/AIFM2/PFKM/KHK/ACSM1/AACS/NUP43/PPP1CA/GCKR/AKR1B1/COX11/MTFR1/RDH16/NDUFB4/SUCLA2/CYB561/GLDC/NDUFA10/IRS1/PGAM1/PPP1CB/BDH1/PYGB/COX7A2L/ACO2/CISD1/MDH1/NUP37/MAOB/NDUFA9/GNPDA1/PDHA1/NDUFB6/PHB2/PKLR/ALDH1B1/PSEN1/UQCRB/SLC25A33/PGD/ASPH/THTPA/UQCRQ/IMMP2L/NDUFV1/UGP2/PYGM/CROT/ADH6/CYB5R4/PANK2/NUP85/PHKB/UQCRC2/PPP1CC/FECH/COX7A2/SURF1/ETFA/FDX1/PFKL/COX6C/PARK7/NUP54/HMGCL/BPGM/GYS2/PASK/PDHB/SDHA/PGK1/PGAM2/NNT/ACAT1/SLC25A23/SUCLG1/NDUFA11/NDUFB10/XYLB/DGUOK/VCP/COX6B1/HK3/SHPK/CAT/TKT/XDH/NDUFC1/IDO1/RPE/ME2/ISCU/NCF2/PGAM4/NDUFAB1/ENPP1/NDUFB3/DERA/ALDOC/ENTPD5/NDUFA12/AGL/GBE1/IDH2/ADH1B/ETFB/PPP1R3F/ADH7 |
| GOMF_LIGAND_GATED_ION_CHANNEL_ACTIVITY | GOMF_LIGAND_GATED_ION_CHANNEL_ACTIVITY | 131 | -0.407429334 | -1.759960199 | 9.10E-05 | 0.0022024 | 0.001696547 | 3394 | tags=41%, list=22%, signal=33% | SCNN1G/CHRNB4/KCNJ9/HTR3E/GABRR2/HCN2/CNGA2/CHRNA7/GABRG3/CHRNB2/CHRNA9/GRIN2D/CHRNA3/ABCC8/GRIA2/GLRA3/HTR3A/KCNJ12/KCNJ1/CHRNA4/GRIK4/CHRNA6/KCNJ14/RYR2/CNGA3/GABRA5/CNGB3/GRIK3/TRPA1/CNGA4/HTR3B/TRPM4/KCNA10/GLRA1/GRIK5/GABRB2/KCNJ6/GRID1/GLRA2/TPCN1/SCNN1A/GABRR1/TPCN2/GABRD/CNGB1/GABRA2/ITPR1/CHRNA10/GABRB1/HCN4/P2RX1/HTR3C/SCNN1B/KCNK1 |
| GOBP_POSITIVE_REGULATION_OF_MAP_KINASE_ACTIVITY | GOBP_POSITIVE_REGULATION_OF_MAP_KINASE_ACTIVITY | 215 | -0.356546038 | -1.664150458 | 9.29E-05 | 0.002234962 | 0.00172163 | 2023 | tags=21%, list=13%, signal=19% | DKK1/IRAK1/FGF10/PTPN1/AVPI1/PDGFC/BIRC7/MAP2K3/CXCR4/FGD2/PDGFB/FLT3/DUSP9/NOD2/NTRK3/GRM4/BMP2/TGFB1/MAPKAPK2/VEGFA/IGF1/IRAK2/DUSP5/PROK1/ARHGEF5/SAA1/CSK/C5AR1/S1PR2/FGFR1/IGFBP6/SBK2/FPR1/DUSP6/EDN3/ERN1/LPAR1/IL1B/EDN1/S100A12/TNIK/THBS1/GADD45B/TGFB3/PROK2/GADD45G |
| GOBP_REGULATION_OF_GLIOGENESIS | GOBP_REGULATION_OF_GLIOGENESIS | 81 | -0.4812569 | -1.898268683 | 9.31E-05 | 0.002234962 | 0.00172163 | 2716 | tags=35%, list=17%, signal=29% | DRD3/ASPA/PTPRZ1/RELA/SOX8/NOG/HES1/ZNF365/TTBK1/TNFRSF1B/CXCR4/NKX2-2/LRP2/BMP2/TGFB1/DUSP10/HES5/DAAM2/GPR37L1/SOX11/MAG/ADCYAP1/LDLR/IL1B/NR1D1/LIF/CLCF1/IL6 |
| GOBP_URONIC_ACID_METABOLIC_PROCESS | GOBP_URONIC_ACID_METABOLIC_PROCESS | 13 | 0.772760776 | 2.061727154 | 9.48E-05 | 0.002267206 | 0.001746468 | 1853 | tags=62%, list=12%, signal=54% | UGT2A3/ABHD10/UGT2B11/AKR1A1/UGT2B15/PRKCE/UGT2B4/UGT2B7 |
| GOBP_NEGATIVE_REGULATION_OF_NERVOUS_SYSTEM_DEVELOPMENT | GOBP_NEGATIVE_REGULATION_OF_NERVOUS_SYSTEM_DEVELOPMENT | 128 | -0.411396306 | -1.754677948 | 9.55E-05 | 0.002277051 | 0.001754051 | 2797 | tags=34%, list=18%, signal=28% | TLX2/DRD3/TRIM11/MT3/SEMA6A/SEMA3C/SEMA6C/VAX1/OMG/NOG/ID1/MAP2/TRIM46/CBLN1/HES1/CCL11/KIAA0319/SEMA3D/NFATC4/DLL3/WNT3A/SEMA4F/SEMA3B/ARHGDIA/SEMA3A/DUSP10/HES5/DAAM2/DCC/SEMA4A/GPR37L1/PLXNA3/SOX11/MAG/WNT3/SEMA4B/ADCYAP1/LDLR/LRP4/IL1B/TNR/NR1D1/IL6 |
| GOBP_REGULATION_OF_GLIAL_CELL_DIFFERENTIATION | GOBP_REGULATION_OF_GLIAL_CELL_DIFFERENTIATION | 61 | -0.518841621 | -1.953985423 | 9.59E-05 | 0.00227723 | 0.00175419 | 2716 | tags=43%, list=17%, signal=35% | DRD3/ASPA/PTPRZ1/RELA/NOG/TNFRSF21/SOX1/HES1/WDR1/ZNF365/TTBK1/TNFRSF1B/CXCR4/NKX2-2/BMP2/TGFB1/DUSP10/HES5/DAAM2/GPR37L1/MAG/LDLR/NR1D1/LIF/CLCF1/IL6 |
| GOBP_CIRCADIAN_RHYTHM | GOBP_CIRCADIAN_RHYTHM | 196 | -0.362530484 | -1.665673139 | 9.79E-05 | 0.002316168 | 0.001784184 | 3017 | tags=32%, list=19%, signal=26% | EGFR/JUND/CHRNB2/ATF4/MYBBP1A/MTNR1B/HNRNPU/ASS1/NTRK1/ZFHX3/CRY1/DRD3/RPE65/CSNK1D/RAI1/SIRT1/ADIPOQ/SIN3A/GHRL/AHCY/PIWIL2/NKX2-1/CARTPT/OPN4/ID1/ADA/TH/SRD5A1/ARNTL2/SLC6A4/SOX14/PER3/NCOR1/RELB/ZPBP2/MC3R/CSNK1E/TPH2/PROX1/GHRH/KLF9/NFIL3/CPT1A/ADRB1/LEP/NTRK2/KLF10/NLGN1/GNA11/PROK1/PER2/PASD1/NAMPT/EGR3/JUN/ID4/PPARGC1A/NR1D1/PROK2/SIK1/SERPINE1/EGR1 |
| GOBP_NEGATIVE_REGULATION_OF_CELL_CYCLE_PHASE_TRANSITION | GOBP_NEGATIVE_REGULATION_OF_CELL_CYCLE_PHASE_TRANSITION | 222 | 0.345827875 | 1.62324493 | 9.94E-05 | 0.002343234 | 0.001805034 | 3636 | tags=39%, list=23%, signal=30% | GPNMB/NDC80/CDK5RAP2/PSMD10/BRCA1/DTL/MAD2L1/PCNA/CHEK1/ZWINT/AURKA/PKD2/PSMB9/BUB1/PSMA2/BRCC3/CDK6/CNOT8/PSMB7/GEN1/PSME2/FZR1/IK/PSMD14/AURKB/CDC73/KANK2/DLG1/DONSON/USP47/CDT1/PSMA4/ZFYVE19/GADD45A/APC/RFPL1/PSMD4/NAE1/PSMD7/RPL26/PSMD1/RAD17/TRIAP1/KLHL22/PSMA3/TRIP13/FBXO7/PSMD13/MAD2L2/SKP1/KNTC1/SLFN11/XRCC3/RBL1/RBX1/PSMD11/DYNC1LI1/CDKN1B/RB1/SYF2/SUSD2/PSMA1/CHEK2/CDC20/PSMB10/CDKN2C/PSMC6/PSMB5/PTEN/BUB3/CLSPN/PSMC4/CDC6/PSMG2/ZNF830/PSMC3/BRD7/MYO16/LCMT1/PSME1/FOXO4/ATM/PSMB1/PRMT2/PSMD2/PCBP4 |
| GOBP_NEGATIVE_REGULATION_OF_CELL_CYCLE_G2_M_PHASE_TRANSITION | GOBP_NEGATIVE_REGULATION_OF_CELL_CYCLE_G2_M_PHASE_TRANSITION | 94 | 0.45295685 | 1.889101896 | 0.000100286 | 0.002355985 | 0.001814856 | 3589 | tags=46%, list=23%, signal=35% | PSMD10/BRCA1/DTL/CHEK1/AURKA/PSMB9/PSMA2/BRCC3/PSMB7/PSME2/FZR1/PSMD14/AURKB/DONSON/USP47/PSMA4/ZFYVE19/RFPL1/PSMD4/NAE1/PSMD7/PSMD1/RAD17/PSMA3/PSMD13/SKP1/RBX1/PSMD11/SYF2/PSMA1/PSMB10/PSMC6/PSMB5/CLSPN/PSMC4/CDC6/ZNF830/PSMC3/PSME1/FOXO4/ATM/PSMB1/PSMD2 |
| GOBP_OXIDATIVE_PHOSPHORYLATION | GOBP_OXIDATIVE_PHOSPHORYLATION | 101 | 0.440871246 | 1.866653407 | 0.000101106 | 0.002357288 | 0.001815859 | 5623 | tags=59%, list=36%, signal=38% | MSH2/NUPR1/COX15/NDUFAF1/NDUFA5/PPIF/NDUFS4/NDUFA6/DLD/NDUFB2/NDUFB1/NDUFB4/NDUFA10/COX7A2L/NDUFA9/NDUFB6/UQCRB/SLC25A33/UQCRQ/NDUFV1/UQCRC2/COX7A2/SURF1/COX6C/PARK7/SDHA/SLC25A23/NDUFA11/NDUFB10/DGUOK/VCP/COX6B1/NDUFC1/ISCU/NDUFAB1/NDUFB3/NDUFA12/COX6A1/UQCRC1/SDHD/NDUFB5/NDUFS2/ATP7A/SDHC/NDUFA1/NDUFS5/COX4I1/BID/NDUFS8/NDUFS7/COX5B/NDUFB11/PINK1/NDUFA8/NDUFA2/NDUFV2/NDUFA7/STOML2/NDUFC2/NDUFB7 |
| GOBP_ODONTOGENESIS_OF_DENTIN_CONTAINING_TOOTH | GOBP_ODONTOGENESIS_OF_DENTIN_CONTAINING_TOOTH | 82 | -0.467077472 | -1.850342175 | 0.000101173 | 0.002357288 | 0.001815859 | 2018 | tags=24%, list=13%, signal=21% | GLI3/FGF10/AMTN/CSF1/AMELX/ODAM/BMP2/HAND1/LHX8/BCL2L11/SLC24A4/KLK4/CSF3R/ADM/MSX1/FST/LRP4/FOXO1/FOXC1/SERPINE1 |
| GOBP_DNA_DAMAGE_RESPONSE_DETECTION_OF_DNA_DAMAGE | GOBP_DNA_DAMAGE_RESPONSE_DETECTION_OF_DNA_DAMAGE | 37 | 0.579894849 | 1.967852289 | 0.000101569 | 0.002357288 | 0.001815859 | 4251 | tags=57%, list=27%, signal=41% | DTL/PCNA/RFC1/POLD1/MRPS9/RFC3/WDR48/RBX1/RFC5/NEK1/RPA3/RAD18/MRPS35/POLD2/MRPS11/RFC4/POLD3/RPS27A/RPS3/RPA1/USP1 |
| GOCC_CENTRIOLE | GOCC_CENTRIOLE | 107 | 0.436557372 | 1.861904474 | 0.000101795 | 0.002357288 | 0.001815859 | 3236 | tags=36%, list=21%, signal=29% | CCDC146/CNTLN/MPHOSPH9/TOP2A/CETN2/CEP290/AURKA/CETN3/BBS4/IFT52/RAB8A/MDM1/CCNF/CBY1/SASS6/CEP78/SDCCAG8/NEDD1/CEP250/CAPG/KIF3A/CEP152/HYLS1/CEP120/HERC2/CCHCR1/CEP63/ODF2L/ROCK1/CNTROB/CEP192/NIN/AGBL2/PLK4/CENPJ/TUBGCP3/WDR62/CCDC88A/IQCB1 |
| GOCC_CYTOSOLIC_SMALL_RIBOSOMAL_SUBUNIT | GOCC_CYTOSOLIC_SMALL_RIBOSOMAL_SUBUNIT | 42 | 0.570218655 | 1.975476991 | 0.000104456 | 0.002407309 | 0.001854392 | 4477 | tags=55%, list=29%, signal=39% | RPS4Y1/ISG15/HBA2/RPS21/MCTS1/RPS26/RPSA/RPS7/RPS23/RPS29/RPS3A/MRPS11/RPS2/RPS15A/DHX29/RPS27A/RPS27L/RPS3/RPS9/LARP4/RPS24/RPS12/RPS8 |
| GOBP_TISSUE_REMODELING | GOBP_TISSUE_REMODELING | 158 | -0.388538576 | -1.727478228 | 0.000104718 | 0.002407309 | 0.001854392 | 1177 | tags=17%, list=8%, signal=16% | PLEKHM1/IL1A/JAG1/TGFB1/LEP/MMP2/TGM2/RAB3D/CEACAM1/LRP5/TNFAIP3/LEPR/GJA1/NOS3/ADRB2/CSK/EPAS1/FOXC2/GDF5/ACVR2B/CALCA/ELF3/LIF/TGFB3/FOXC1/EPHA2/IL6 |
| GOBP_REGULATION_OF_PHOSPHATIDYLINOSITOL_3_KINASE_ACTIVITY | GOBP_REGULATION_OF_PHOSPHATIDYLINOSITOL_3_KINASE_ACTIVITY | 52 | -0.539197666 | -1.983371876 | 0.000105069 | 0.002407309 | 0.001854392 | 1561 | tags=27%, list=10%, signal=24% | FPR2/PDGFB/CCR7/FLT3/NOD2/TGFB1/CCL21/TNFAIP8L3/CD19/CISH/KLF4/SOCS3/SOCS2/SOCS1 |
| GOBP_POST_GOLGI_VESICLE_MEDIATED_TRANSPORT | GOBP_POST_GOLGI_VESICLE_MEDIATED_TRANSPORT | 96 | 0.441239679 | 1.844647973 | 0.000106668 | 0.00243533 | 0.001875976 | 5082 | tags=56%, list=33%, signal=38% | RAB26/RABIF/SCFD1/WIPI1/KIF16B/GOLPH3L/BBS2/GOPC/VTI1B/VPS13C/EXOC4/CCDC93/VAMP5/OPTN/CCDC22/NSF/VAMP8/VAMP3/GOSR2/LYPLA1/GOLGA7/MYO5A/KRT18/EXOC6/RSC1A1/VPS54/LLGL1/ARFRP1/SNAP23/RAB10/STX4/CCDC91/GBF1/LAMP1/BLZF1/RABEP1/EXOC8/GOLGA4/VPS52/EXOC1/EXOC2/GGA3/MON2/MYO1B/CLN3/ARFGEF2/RP2/RAB14/AP1G2/GGA2/EXOC6B/VAMP7/KLHL20/ARL3 |
| GOBP_REGULATION_OF_VASCULAR_ASSOCIATED_SMOOTH_MUSCLE_CELL_PROLIFERATION | GOBP_REGULATION_OF_VASCULAR_ASSOCIATED_SMOOTH_MUSCLE_CELL_PROLIFERATION | 48 | -0.554282393 | -1.999934892 | 0.000115071 | 0.002617966 | 0.002016664 | 971 | tags=27%, list=6%, signal=25% | MMP2/IGF1/GJA1/CDKN1A/FGF9/NR4A3/IL10/JUN/ERN1/CNN1/EDN1/TGFB3/ADAMTS1 |
| GOBP_UROGENITAL_SYSTEM_DEVELOPMENT | GOBP_UROGENITAL_SYSTEM_DEVELOPMENT | 307 | -0.322384068 | -1.572789139 | 0.000116626 | 0.002644066 | 0.00203677 | 2415 | tags=23%, list=16%, signal=20% | SOX8/NOG/WNK4/PKHD1/TFAP2A/HOXA11/FRAS1/PKD1L3/GLIS2/MAGI2/SRD5A1/TGFB2/WNT7B/HES1/AGTR1/GLI3/FGF10/SPRY1/ASXL1/BMP6/CYP4A22/GZF1/CITED1/GCNT3/SERPINB5/LRP2/NKX3-1/PDGFB/PROX1/SIX4/TFAP2B/HYAL2/CYP4A11/ACTA2/NID1/SULF1/COL4A4/BMP2/JAG1/VEGFA/GATA3/CRIP1/COL4A3/HES5/VANGL2/BCL2L11/PODXL/TIPARP/IRX2/SMAD3/ADAMTS16/HOXA13/WT1/GPR4/NPHS1/SOX11/ARG2/FOXC2/HOXD13/OSR1/HAS2/ARID5B/IRX3/LRP4/SOX17/TACSTD2/SDC4/LIF/FOXC1/ADAMTS1/MYC/EGR1 |
| GOCC_GABA_ERGIC_SYNAPSE | GOCC_GABA_ERGIC_SYNAPSE | 61 | -0.515582846 | -1.9417127 | 0.00011833 | 0.002666892 | 0.002054353 | 3892 | tags=49%, list=25%, signal=37% | ATP2B1/DRD2/ATP2B3/GABBR1/GAP43/GABRR2/CNTN5/GABRG3/SLC32A1/BSN/DRD3/SLITRK1/NPTN/GABRA5/ERC2/SLC6A17/GABRB2/LRRTM2/NLGN3/PLCB1/LRRTM1/SV2A/SLC6A11/GABRR1/CDH13/SLITRK2/CDH10/LRFN5/GABRB1/SLITRK3 |
| GOBP_MORPHOGENESIS_OF_A_BRANCHING_STRUCTURE | GOBP_MORPHOGENESIS_OF_A_BRANCHING_STRUCTURE | 184 | -0.374732648 | -1.707001866 | 0.000118455 | 0.002666892 | 0.002054353 | 2486 | tags=27%, list=16%, signal=23% | SEMA3C/NKX2-1/ACVR1/SOX8/NOG/PKHD1/FZD5/HOXA11/MET/HOXA5/ERMN/CCL11/GLI3/NRARP/FGF10/RBM15/NFATC4/SPRY1/CSF1/GZF1/CITED1/NKX3-1/TGFBR2/PROX1/LAMA1/SIX4/GCM1/GRHL2/SEMA3A/SULF1/BMP2/TGM2/VEGFA/LRP5/ADAMTS16/SPRY2/HOXA13/WT1/ADM/FOXC2/SRF/HOXD13/IL10/RASIP1/TACSTD2/EDN1/SOCS3/EPHA2/MYC |
| GOBP_MULTICELLULAR_ORGANISMAL_HOMEOSTASIS | GOBP_MULTICELLULAR_ORGANISMAL_HOMEOSTASIS | 480 | -0.294409283 | -1.494441946 | 0.000120907 | 0.002712658 | 0.002089607 | 3189 | tags=28%, list=21%, signal=23% | PPP1R13L/PCDH15/TJP2/EHMT1/GJB6/WNT10B/SLC35D3/STAT6/EGFR/IL4/NOVA2/CLDN18/OXTR/ATF4/NTSR1/TNFSF11/MUC4/YAP1/NOX3/CD34/RPE65/ACTB/WWTR1/JAM2/ADIPOQ/HAMP/CEBPB/GHRL/MLXIPL/BARD1/CARTPT/FLG/ID1/MET/CAV1/CNOT3/G0S2/SLC11A2/AQP3/UCP1/S1PR1/ADCY4/TFF1/MUC13/SLC12A2/RP1L1/NXNL1/USH1G/PRDM16/PDGFC/DBH/RAC1/CIB2/VCL/BMP6/STAT3/IL18R1/CSF1/IRF4/RDH12/TP53INP2/ADCY5/TFRC/CYTL1/MC3R/CXCR4/ADCY3/GRHL1/SLC27A1/CDH23/KRT16/ATP6V1B1/TFAP2B/ESAM/LCN2/HYAL2/CYP4A11/PLEKHM1/NOD2/EBF2/IL1A/TSKU/ATP1B2/ADRB1/LEP/SCNN1A/FA2H/METRNL/RAB3D/VEGFA/CRTC3/ADRB3/RP1/PRDM14/AIPL1/TNFAIP3/CNGB1/PHOX2B/LEPR/DIO2/GJA1/PER2/MAK/HOXA13/KDM6B/NOS3/ADRB2/CSK/NXNL2/GPR3/HOMER1/EPAS1/NR4A3/FOXC2/ADCYAP1/SRF/SLC11A1/ACVR2B/HAS2/CALCA/IRX3/PPARGC1A/IL1B/ALOX12B/NR1D1/FOXO1/SFN/SCNN1B/IL4R/FOXC1/PTGS2/GADD45G/EGR1/IL6 |
| GOBP_BILE_ACID_SIGNALING_PATHWAY | GOBP_BILE_ACID_SIGNALING_PATHWAY | 13 | 0.766883634 | 2.046046929 | 0.000122837 | 0.002746223 | 0.002115463 | 316 | tags=23%, list=2%, signal=23% | CYP7A1/ABCC4/ABCG8 |
| GOBP_REGULATION_OF_HORMONE_SECRETION | GOBP_REGULATION_OF_HORMONE_SECRETION | 241 | -0.341265517 | -1.609649174 | 0.00012325 | 0.002746223 | 0.002115463 | 3320 | tags=32%, list=21%, signal=26% | FGG/TIAM1/TFR2/SLC16A1/CRH/CACNA1A/ACVR1C/CACNA1E/FGA/EGFR/SYTL4/IFNG/ALOX5/TNFSF11/MTNR1B/GLP1R/FOXA2/ISL1/C1QTNF1/CRY1/ABCC8/ADIPOQ/ITSN1/GHRL/SSTR5/P2RY1/CARTPT/G6PC2/STX1A/CCKAR/RETN/AGTR1/UCN3/KCNC2/KALRN/RAC1/BMP6/TRPM4/CYP19A1/FFAR3/DOC2B/KCNG2/ADCY5/NKX3-1/IL11/GHRH/TFAP2B/SLC30A8/CPT1A/LEP/KCNS3/EFNA5/GHSR/LRP5/KCNA5/FFAR2/ITPR1/GJA1/PER2/RASL10B/TCF7L2/GPR27/TAC1/PLA2G3/TRH/SOX11/ADCYAP1/OSM/EDN3/IRS2/IL1B/INHBB/NR1D1/PIM3/EDN1/LIF/MIDN/IL6 |
| GOMF_NEUROTRANSMITTER_RECEPTOR_ACTIVITY | GOMF_NEUROTRANSMITTER_RECEPTOR_ACTIVITY | 105 | -0.436634946 | -1.797987425 | 0.000125339 | 0.002783212 | 0.002143956 | 4500 | tags=55%, list=29%, signal=40% | GABRP/GABRA6/GABRA1/GRIN3A/GRIK1/HTR5A/GRIN2C/CHRNA5/DRD4/DRD2/CHRNG/GRIN1/HTR3D/HTR2C/GABBR1/CHRNB4/OR10H1/HTR3E/GABRR2/CHRNA7/GABRG3/OR10H4/CHRNB2/CHRNA9/GRIN2D/CHRNA3/HRH2/DRD3/GRIA2/GLRA3/HTR3A/HTR1F/CHRNA4/GRIK4/CHRNA6/HTR4/GABRA5/GRIK3/OR5T2/OR5T3/DRD5/HTR3B/GLRA1/GRIK5/GABRB2/CHRM1/OR10H2/GRID1/GLRA2/ADRB1/GABRR1/GABRD/CHRM5/OR10H5/GABRA2/CHRNA10/GABRB1/HTR3C |
| GOBP_SPINDLE_ORGANIZATION | GOBP_SPINDLE_ORGANIZATION | 149 | 0.387350629 | 1.730893234 | 0.000126336 | 0.002795781 | 0.002153638 | 4094 | tags=40%, list=26%, signal=29% | ASPM/NDC80/GNAI1/TUBG2/SPAST/AURKA/TUBG1/RACGAP1/RCC1/SAC3D1/GOLGA2/CHMP5/AURKB/DLG1/CCNB2/KIFC1/STAG1/CHMP2A/NEK2/TACC3/CEP120/ESPL1/CLASP2/UVRAG/PRC1/NUF2/CENPH/NEK7/MLH1/CEP63/KIF3B/KIF11/TNKS/CEP192/CLTC/ATRX/DYNC1H1/MAPRE2/CHEK2/CDC20/CENPJ/DLGAP5/STMN1/VPS4B/TUBGCP3/STAG2/WDR62/INCENP/CHMP1A/VCP/CENPE/DRG1/DCTN6/CEP97/BCCIP/CHMP2B/LZTS2/KIF2A/RPS3 |
| GOBP_CELLULAR_AMINO_ACID_METABOLIC_PROCESS | GOBP_CELLULAR_AMINO_ACID_METABOLIC_PROCESS | 283 | 0.326734873 | 1.575585401 | 0.000128112 | 0.002825436 | 0.002176482 | 3863 | tags=39%, list=25%, signal=30% | DDO/SIRT4/CSAD/NIT2/ART4/IDO2/DAO/PSMD10/NAGS/OAZ2/WARS2/PSPH/HIBCH/IYD/PEPD/QDPR/FN3K/PSMB9/FOLH1/LARS2/PSMA2/DDC/DHFR/DIO1/PSMB7/DLD/GCSH/ACAD8/PSME2/BCAT1/CRYM/PSMD14/GLS/GFPT1/GLYATL1/PSMA4/ALDH18A1/BHMT2/ALDH8A1/PSMD4/DDAH2/PSMD7/NARS2/AASDHPPT/GLDC/GSS/PSMD1/SRR/ACY1/HNMT/PSMA3/HARS2/GLYAT/FARS2/RARS2/PSMD13/THNSL2/MCCC1/AUH/YARS2/HPD/CTPS2/PSMD11/MTHFS/GLUD2/HSD17B10/AASDH/FAH/SLC7A7/AFMID/NR1H4/AGMAT/PSMA1/GCLC/PSMB10/PIPOX/PSMC6/CTNS/PSMB5/CARS2/APIP/PARK7/HMGCL/ASNSD1/DPYS/PSMC4/GLUL/NQO1/HNF4A/PSMC3/ACAT1/BCKDK/PARS2/PSME1/IVD/FPGS/MSRA/BHMT/PSMB1/TTC36/AGXT2/UROC1/TST/PSMD2/MPST/IDO1/ACMSD/DPEP1/SHMT1/PSMA5/DARS2 |
| GOBP_POSITIVE_REGULATION_OF_PROTEIN_SERINE_THREONINE_KINASE_ACTIVITY | GOBP_POSITIVE_REGULATION_OF_PROTEIN_SERINE_THREONINE_KINASE_ACTIVITY | 286 | -0.329987103 | -1.593110505 | 0.000129272 | 0.00284136 | 0.002188749 | 3173 | tags=28%, list=20%, signal=23% | AGER/RIPK2/SASH1/CHRNA7/EGFR/CAB39L/MAPK8IP3/NTF3/IFNG/MST1R/DUSP7/TNFSF11/INSR/SPDYA/SIRT1/ADIPOQ/CSPG4/GHRL/DUSP19/MAP3K6/FZD5/FAM20A/AKAP13/DBF4B/DKK1/IRAK1/FGF10/PTPN1/AVPI1/PDGFC/BIRC7/MAP2K3/CCNT1/MAPRE3/CXCR4/FGD2/PDGFB/SLC27A1/PROX1/FLT3/DUSP9/DDX3X/NOD2/NTRK3/PSRC1/GRM4/BMP2/TGFB1/MAPKAPK2/VEGFA/IGF1/IRAK2/DUSP5/PROK1/ATP2B4/SPRY2/ARHGEF5/SAA1/ADRB2/CSK/C5AR1/S1PR2/FGFR1/IGFBP6/SBK2/FPR1/DUSP6/EDN3/ERN1/LPAR1/IL1B/SLC8A2/EDN1/S100A12/TNIK/THBS1/GADD45B/TGFB3/PROK2/GADD45G |
| GOCC_KINETOCHORE | GOCC_KINETOCHORE | 109 | 0.435320525 | 1.856323926 | 0.000131853 | 0.002877731 | 0.002216766 | 4461 | tags=54%, list=29%, signal=39% | NDC80/DSN1/ITGB3BP/KIF22/MAD2L1/ZWINT/CENPQ/SS18L1/SKA2/NUDCD2/BUB1/CENPK/ZWILCH/AURKB/SEC13/MIS12/CDT1/APC/XPO1/DYNLT3/NUP43/NEK2/CFDP1/DCTN5/TP53BP1/CBX5/NUP37/CLASP2/PSEN2/SPC24/KNTC1/PSEN1/PPP1R12A/NUF2/CENPH/HJURP/PHF6/DYNC1LI1/NUP85/CENPM/DYNLL1/PPP1CC/BUB3/CENPN/KAT2B/INCENP/NSL1/PAFAH1B1/CENPE/DCTN4/ZW10/DCTN6/KIF2C/SKA1/CENPI/SPC25/SUGT1/TTK/DCTN3 |
| GOMF_GROWTH_FACTOR_BINDING | GOMF_GROWTH_FACTOR_BINDING | 127 | -0.405613599 | -1.729498567 | 0.000132116 | 0.002877731 | 0.002216766 | 3258 | tags=37%, list=21%, signal=29% | COL4A1/IL2RA/ACVR1C/EGFR/SPINT3/FGFBP1/ESM1/ACVR1B/NTRK1/INSR/FURIN/CRIM1/HAP1/SCN5A/ACVR1/A2M/HTRA4/IGFBP4/ITGB4/COL6A1/WFIKKN2/LRRC32/LRP2/DUSP1/PDGFB/TGFBR2/FLT3/HYAL2/NTRK3/TSKU/FGFRL1/NTRK2/TGFBR3/IGFALS/CXCL13/OSMR/NKD2/LTBP4/FGFR1/IGFBP6/KL/IL1RN/ACVR2B/THBS1/TGFB3/IGFBP2/IGFBP1 |
| GOBP_MYELOID_LEUKOCYTE_MIGRATION | GOBP_MYELOID_LEUKOCYTE_MIGRATION | 194 | -0.360611115 | -1.656877257 | 0.000132258 | 0.002877731 | 0.002216766 | 2086 | tags=26%, list=13%, signal=23% | TGFB2/MMP28/CCL11/WDR1/CCL8/RAC1/CCL25/CSF1/CXCL5/PGF/FPR2/CX3CL1/PDE4B/DUSP1/PDGFB/AKIRIN1/CCL20/CCR7/AZU1/PLCB1/RIN3/NOD2/CCL3L3/MTUS1/PRTN3/VEGFA/CXCL6/CCL21/LBP/S100A9/PIP5K1C/S100A8/CCL26/CXCL13/SIRPA/CSF3R/VEGFC/SAA1/C5AR1/CCL3/CCL7/EDN3/CALCA/CXCL2/CXCL1/EDN1/S100A12/THBS1/CCL2/SERPINE1/IL6 |
| GOBP_POSITIVE_REGULATION_OF_CELL_CELL_ADHESION | GOBP_POSITIVE_REGULATION_OF_CELL_CELL_ADHESION | 259 | -0.336525555 | -1.60035904 | 0.000134644 | 0.002919836 | 0.0022492 | 3173 | tags=29%, list=20%, signal=23% | AGER/MAGI1/RIPK2/NCK2/FGA/IL4/IFNG/ALOX5/PDCD1/PCK1/TNFSF11/CD276/SOX2/FOXA2/HHLA2/ITPKB/RELA/IL12A/TNFSF9/ADA/CAV1/CEACAM6/ZMIZ1/HES1/GLI3/IL23R/IRAK1/CTLA4/RAC1/WNT3A/ADAM19/CX3CL1/TFRC/PRKCQ/TGFBR2/CCR7/NOD2/PDPN/IL1A/FUT3/LILRB2/LEP/DUSP10/GATA3/IGF1/CCL21/FLOT2/JAK3/PODXL/EBI3/CXCL13/EPO/TNFRSF13C/CD274/SIRPA/CSK/TNFSF14/SIRPB1/ICAM1/NR4A3/PLAUR/SLC7A1/EGR3/IL10/HAS2/MAP3K8/IL1B/NFKBIZ/BCL6/IL4R/CCL2/IGFBP2/SOCS1/IL6 |
| GOBP_REGULATION_OF_SMOOTH_MUSCLE_CONTRACTION | GOBP_REGULATION_OF_SMOOTH_MUSCLE_CONTRACTION | 51 | -0.541483944 | -1.981469749 | 0.000135982 | 0.002926013 | 0.002253958 | 1090 | tags=41%, list=7%, signal=38% | MYOCD/ITGA2/TACR1/OXTR/CHRNA3/GHRL/ADA/CAV1/TBXA2R/KCNB2/ATP1A2/SPHK1/GHSR/ADRB2/P2RX1/SRF/CALCA/CNN1/EDN1/RGS2/PROK2 |
| GOBP_CELLULAR_KETONE_METABOLIC_PROCESS | GOBP_CELLULAR_KETONE_METABOLIC_PROCESS | 229 | 0.346505896 | 1.62964109 | 0.000136283 | 0.002926013 | 0.002253958 | 3071 | tags=29%, list=20%, signal=24% | CYP7A1/AKR1B10/PRKAA2/FABP5/SIRT4/PDP2/BMP5/COQ10A/CYP11A1/IDO2/AKR1A1/GPD1/PSMD10/PRKAB2/BRCA1/DHRS9/OAZ2/STARD4/PSMB9/PSMA2/PRKCE/PSMB7/NMT1/PSME2/ACADL/PSMD14/SLC45A3/RGN/PSMA4/ALDH8A1/AIFM2/CLCN2/PSMD4/SRD5A2/AKR1B1/PSMD7/PSMD1/IRS1/APOA5/CRYZL1/PSMA3/HAGH/NDUFA9/MID1IP1/PDSS2/ABCD2/PSMD13/CYP4F2/COQ3/PSMD11/HSD17B10/PANK2/TYSND1/SLC7A7/ELOVL5/AFMID/NR1H4/GLO1/PSMA1/PSMB10/PSMC6/PSMB5/PARK7/APOC1/CBR4/PSMC4/NQO1 |
| GOBP_POSITIVE_REGULATION_OF_EPITHELIAL_CELL_MIGRATION | GOBP_POSITIVE_REGULATION_OF_EPITHELIAL_CELL_MIGRATION | 138 | -0.404232008 | -1.752514209 | 0.000136283 | 0.002926013 | 0.002253958 | 2287 | tags=22%, list=15%, signal=19% | MET/ANXA3/HMOX1/TGFB2/FGF10/RAC1/MAP2K3/NFE2L2/PDGFB/TGFBR2/PROX1/BCAR1/TGFB1/FOXP1/VEGFA/GATA3/INSL3/NOS3/VEGFC/TAC1/ANGPT4/FGFR1/RHOB/FOXC2/HAS2/EDN1/HBEGF/THBS1/PTGS2/ZC3H12A/VIL1 |
| GOBP_P38MAPK_CASCADE | GOBP_P38MAPK_CASCADE | 43 | -0.5692678 | -2.007690812 | 0.000140064 | 0.002997272 | 0.00230885 | 1666 | tags=30%, list=11%, signal=27% | MAP2K3/DUSP1/BMP2/LEP/MAPKAPK2/DUSP10/VEGFA/SPHK1/IL1B/GADD45B/ZFP36/GADD45G/ZC3H12A |
| GOMF_METAL_ION_TRANSMEMBRANE_TRANSPORTER_ACTIVITY | GOMF_METAL_ION_TRANSMEMBRANE_TRANSPORTER_ACTIVITY | 403 | -0.309678224 | -1.545831527 | 0.000142784 | 0.003037148 | 0.002339567 | 3796 | tags=36%, list=24%, signal=28% | ATP2B3/GRIN1/LRRC52/SLC6A9/KCNG1/ORAI2/ATP4B/SLC10A3/KCNJ13/CACNB1/ATP13A1/SLC6A15/LRRC55/SLC4A11/KCNK10/SLC25A37/KCNG3/KCNN2/KCNIP4/SCN10A/SCNN1G/KCNJ9/SLC5A2/SLC4A5/CACNA1A/SCN2A/TTYH1/HCN2/CHRNA7/CACNA1E/ATP1A1/KCNC1/SLC20A2/CHRNA9/GRIN2D/TRPM6/ABCC8/SLC39A4/KCNK4/CACNA2D1/SLC5A7/TRPV3/SLC38A1/KCNJ12/CACNA1I/SLC30A3/KCNJ1/GRIK4/SLC5A4/CACNG5/SCN5A/KCNMB4/CACNG1/SLC12A9/TRPV6/SLC6A20/KCNJ14/RYR2/KCNMB1/PKD1L3/KCNK18/SCN2B/SLC11A2/SLC12A2/CACNA1G/SLC24A3/SLC13A4/GRIK3/TRPA1/SLC6A4/SLC9A4/KCNC2/SLC9A1/SLC6A6/SLC5A6/SCN3B/KCNH6/SLC38A2/PKD1L2/TRPM4/ATP4A/SLC30A1/SLC34A3/KCNA10/KCNT1/KCNN3/CACNG6/KCNG2/KCNS1/KCNIP1/SLC20A1/SLC13A5/PANX1/GRIK5/NIPAL1/SLC8A3/SLC9A8/SLC4A7/SLC22A3/SLC13A2/PKD1L1/KCNS2/KCNJ6/SCN1A/SLC30A8/KCNB2/SLC5A11/SLC25A28/SLC3A2/TPCN1/SCNN1A/SLC6A11/KCNA1/SCN9A/KCNS3/SLC5A8/KCNH3/ATP1A2/TPCN2/CCT8L2/KCNH5/KCNG4/KCNA5/TRPC1/SLC24A4/KCNC3/SLC24A2/ATP2A1/CACNG3/ATP2B4/ITPR1/CHRNA10/SLC4A8/ORAI1/KCNE4/CACNG7/SLC5A1/SCN7A/TRPM1/HCN4/CACNG2/SLC11A1/SLC23A2/SLC8A2/SCNN1B/KCNK1 |
| GOBP_REGULATION_OF_LIPID_BIOSYNTHETIC_PROCESS | GOBP_REGULATION_OF_LIPID_BIOSYNTHETIC_PROCESS | 176 | 0.365844823 | 1.66928857 | 0.000142864 | 0.003037148 | 0.002339567 | 1072 | tags=18%, list=7%, signal=17% | CYP7A1/GPAM/SQLE/PRKAA2/FABP5/THRSP/SIRT4/HMGCS1/SPHK2/BMP5/MVK/PRKAB2/BRCA1/HTR2B/FDFT1/ELOVL6/STARD4/LSS/IDI1/ENHO/GPLD1/IDH1/PMVK/TM7SF2/MVD/SEC14L2/NFYB/ACADL/SLC45A3/HSD17B13/ORMDL1/RGN |
| GOBP_CORNIFICATION | GOBP_CORNIFICATION | 105 | -0.434813267 | -1.790486065 | 0.000143737 | 0.003045719 | 0.00234617 | 4285 | tags=46%, list=28%, signal=33% | KRT32/KRT76/KRT81/KRT3/KRT71/SPINK6/PKP1/KRT73/KRT23/KRT34/KRT19/DSP/PI3/KRT9/KRT84/KRT12/KRT74/KRT77/KRT6B/SPINK9/KRT85/KRT25/FURIN/KRT27/JUP/FLG/KRT20/KRT38/KLK14/KRT35/KRT15/KRT28/KRT13/KRT24/SPRR2E/KRT7/CASP14/KRT16/KRT6A/TGM5/KRT33B/SPINK5/KRT4/SPRR3/KRT80/KRT72/KLK13/LIPN |
| GOBP_NEGATIVE_REGULATION_OF_ALPHA_BETA_T_CELL_DIFFERENTIATION | GOBP_NEGATIVE_REGULATION_OF_ALPHA_BETA_T_CELL_DIFFERENTIATION | 26 | -0.644380752 | -2.014549139 | 0.000144906 | 0.003060495 | 0.002357552 | 686 | tags=19%, list=4%, signal=18% | JAK3/BCL6/IL4R/SOCS1/ZC3H12A |
| GOBP_REACTIVE_NITROGEN_SPECIES_METABOLIC_PROCESS | GOBP_REACTIVE_NITROGEN_SPECIES_METABOLIC_PROCESS | 67 | -0.494235201 | -1.89670768 | 0.000148578 | 0.003121337 | 0.00240442 | 612 | tags=33%, list=4%, signal=32% | GCH1/CAV1/GCHFR/RAC1/KHSRP/TICAM1/KLF2/SMAD3/ATP2B4/NOS1/SIRPA/NOS3/ICAM1/NOS1AP/ARG2/IL10/IL1B/EDN1/KLF4/PTX3/PTGS2/ZC3H12A |
| GOBP_APOPTOTIC_PROCESS_INVOLVED_IN_DEVELOPMENT | GOBP_APOPTOTIC_PROCESS_INVOLVED_IN_DEVELOPMENT | 33 | -0.601882532 | -1.97580302 | 0.00014875 | 0.003121337 | 0.00240442 | 2687 | tags=45%, list=17%, signal=38% | SIX3/FGF4/FZD5/TGFB2/SLIT3/TNFRSF1B/PPP2R1B/XKR5/LRP5/CRYAB/BCL2L11/FOXC2/TNFRSF1A/XKR4/FOXC1 |
| GOBP_SMOOTH_MUSCLE_CONTRACTION | GOBP_SMOOTH_MUSCLE_CONTRACTION | 90 | -0.448786215 | -1.801081509 | 0.000149248 | 0.003121696 | 0.002404696 | 1126 | tags=21%, list=7%, signal=20% | ACTA2/SULF1/KCNB2/ATP1A2/TPCN2/SPHK1/GHSR/ATP2B4/ADRB2/P2RX1/SRF/EDN3/CALCA/CNN1/MYH11/EDN1/RGS2/SCNN1B/PROK2 |
| GOMF_MAP_KINASE_PHOSPHATASE_ACTIVITY | GOMF_MAP_KINASE_PHOSPHATASE_ACTIVITY | 14 | -0.755501919 | -1.963993214 | 0.000153362 | 0.003197415 | 0.002463024 | 1412 | tags=57%, list=9%, signal=52% | DUSP1/DUSP16/DUSP9/DUSP21/DUSP10/DUSP5/DUSP8/DUSP6 |
| GOBP_MYELOID_CELL_DIFFERENTIATION | GOBP_MYELOID_CELL_DIFFERENTIATION | 347 | -0.309843411 | -1.524222092 | 0.000155345 | 0.003228377 | 0.002486875 | 3007 | tags=25%, list=19%, signal=21% | IL4/JMJD6/P4HTM/CLDN18/MT1G/IFNG/TNFSF11/BRD1/ACVR1B/ZNF385A/ZBTB7A/SIRT1/ADIPOQ/SIN3A/CEBPB/ITPKB/NFKBIA/CARTPT/MFHAS1/HOXA9/HOXA5/SLC4A1/CDKN2B/SLC11A2/RASGRP4/WDR1/IL23R/RBM15/IRF8/SETD1A/WASF2/TSPAN2/ACTN1/STAT3/CSF1/IRF4/RELB/TFRC/PRKCQ/TGFBR2/CEBPE/CCR7/IL11/FOXO3/HIPK2/SH3PXD2A/JAG1/TGFB1/POU4F2/KLF2/LOX/PRTN3/FOXP1/VEGFA/GATA3/LILRB3/CEACAM1/KLF10/TGFBR3/JAK3/LTBR/TRIB1/POU4F1/THPO/EPO/CSF3/CSF3R/PLA2G3/MYL9/IL20/CCL3/EPAS1/NR4A3/SRF/ITGB8/JUN/BATF3/SBNO2/LIF/THBS1/NFE2/BCL6/ZFP36/EPHA2/MYC/JUNB/FOS |
| GOBP_NEGATIVE_REGULATION_OF_GROWTH | GOBP_NEGATIVE_REGULATION_OF_GROWTH | 226 | -0.354654182 | -1.663091409 | 0.000157018 | 0.003252734 | 0.002505637 | 2691 | tags=29%, list=17%, signal=24% | OSTN/RAI1/SIRT1/MT3/WWC3/ESR2/MSTN/SEMA6A/SEMA3C/DCUN1D3/SEMA6C/MT2A/NOG/RERG/MAP2/PRDM11/TBX5/TRIM46/TGFB2/MT1E/RGS4/KIAA0319/SLC6A4/SEMA3D/MT1F/OSGIN2/WNT3A/SLIT3/SEMA4F/MT1X/SEMA3B/TGFBR2/HYAL2/DDX3X/SEMA3A/PSRC1/TGFB1/ADRB1/DUSP10/DCC/PI16/CRYAB/SEMA4A/FHL1/SH3BP4/SMAD3/CYP27B1/GJA1/CDKN1A/PLXNA3/WT1/ADRB2/MAG/WNT3/SCGB3A1/SEMA4B/MSX1/MT1M/SOX17/TNR/RGS2/MT1A/MT1B/BCL6/SOCS2 |
| GOBP_RESPONSE_TO_LEUKEMIA_INHIBITORY_FACTOR | GOBP_RESPONSE_TO_LEUKEMIA_INHIBITORY_FACTOR | 77 | -0.472417083 | -1.843940016 | 0.000158224 | 0.003267272 | 0.002516836 | 1859 | tags=29%, list=12%, signal=25% | SOX1/PRDM5/NR5A2/SRM/PFKP/TFRC/SYNGR1/TEX14/EFHC2/INA/ABCG4/SPRY2/VEGFC/DTX1/ICAM1/SBNO2/ARID5B/SOX17/GFPT2/KLF5/KLF4/SOCS3 |
| GOBP_DEOXYRIBONUCLEOTIDE_METABOLIC_PROCESS | GOBP_DEOXYRIBONUCLEOTIDE_METABOLIC_PROCESS | 37 | 0.571517431 | 1.939423825 | 0.000159814 | 0.003289626 | 0.002534056 | 4921 | tags=76%, list=32%, signal=52% | TYMS/ADK/NEIL2/TYMP/DUT/OGG1/DCK/CMPK2/RRM2B/RRM1/NUDT1/SAMHD1/NEIL1/DPYS/NTHL1/MBD4/DGUOK/XDH/NUDT18/DERA/GUK1/DCTD/DCTPP1/DPYD/DTYMK/TBPL1/SMUG1/NT5C |
| GOBP_TYROSINE_PHOSPHORYLATION_OF_STAT_PROTEIN | GOBP_TYROSINE_PHOSPHORYLATION_OF_STAT_PROTEIN | 78 | -0.469827327 | -1.842449357 | 0.000162449 | 0.003333298 | 0.002567697 | 2230 | tags=37%, list=14%, signal=32% | IL23A/TNFRSF18/IL13/GH2/IFNA2/IL4/IFNG/ISL1/IL12A/CAV1/HES1/IL23R/STAT3/IL24/CTF1/FLT3/LEP/IGF1/HES5/JAK3/EPO/IL20/TNFRSF1A/OSM/LIF/CLCF1/SOCS3/SOCS1/IL6 |
| GOBP_MACROPHAGE_ACTIVATION | GOBP_MACROPHAGE_ACTIVATION | 91 | -0.44535028 | -1.785167681 | 0.00016482 | 0.003371277 | 0.002596953 | 1674 | tags=30%, list=11%, signal=27% | IFNGR1/TICAM1/FPR2/CX3CL1/TTBK1/AZU1/TNIP2/CD93/FOXP1/CRTC3/LBP/SPHK1/PLA2G3/PLA2G10/C5AR1/CCL3/LRFN5/LDLR/SLC11A1/IL10/SBNO2/IL1RL1/NR1D1/THBS1/IL4R/ZC3H12A/IL6 |
| GOBP_REGULATION_OF_CELL_JUNCTION_ASSEMBLY | GOBP_REGULATION_OF_CELL_JUNCTION_ASSEMBLY | 177 | -0.365098318 | -1.650145177 | 0.000166512 | 0.003395167 | 0.002615355 | 2959 | tags=28%, list=19%, signal=23% | OXTR/CHRNB2/MYOC/NTRK1/COL16A1/SLITRK4/ABL1/GHRL/LINGO2/FZD5/CLSTN2/CAV1/CBLN1/SLITRK1/EEF2K/SLC9A1/RAC1/VCL/WNT3A/PDLIM5/AMIGO3/LRRTM2/PTPRD/NLGN3/EPHB1/SIX4/LRRTM1/CUX2/TPBG/NTRK2/EFNA5/VEGFA/RAPGEF1/IL1RAP/GHSR/NLGN1/SEMA4A/GPM6B/FLRT3/SMAD3/SLITRK2/GJA1/LRFN5/IL1B/APOD/SDC4/THBS1/FAM107A/EPHA2/SLITRK3 |
| GOCC_MITOTIC_SPINDLE | GOCC_MITOTIC_SPINDLE | 125 | 0.407966626 | 1.776635757 | 0.000169607 | 0.003447428 | 0.002655613 | 2684 | tags=33%, list=17%, signal=27% | ASPM/NUSAP1/CDK5RAP2/KIF22/MAD2L1/EML2/TMEM9/AURKA/NEIL2/TUBG1/RACGAP1/NUDCD2/PKD2/SMC6/CKAP2L/GOLGA2/IK/AURKB/TRAT1/CAPG/KIFC1/STAG1/PKP4/EPB41/TACC3/AGBL5/KLHL22/ECT2/YPEL5/ESPL1/CLASP2/YEATS2/PRC1/HNF4G/IL17RB/KIF11/TNKS/NIN/CLTC/DYNLL1/DCDC2 |
| GOBP_RESPONSE_TO_PROGESTERONE | GOBP_RESPONSE_TO_PROGESTERONE | 42 | -0.564982836 | -1.982456124 | 0.000170667 | 0.003458138 | 0.002663863 | 2959 | tags=43%, list=19%, signal=35% | OXTR/YAP1/NCOA1/RELA/CSN1S1/CAV1/ABHD2/TGFB2/TRERF1/NKX2-2/WBP2/TGFB1/GABRB1/THBS1/TGFB3/FOSL1/FOS/FOSB |
| GOBP_REGULATION_OF_VASOCONSTRICTION | GOBP_REGULATION_OF_VASOCONSTRICTION | 57 | -0.507252077 | -1.900023545 | 0.00017212 | 0.003476709 | 0.002678169 | 3343 | tags=47%, list=21%, signal=37% | AKT1/ACE/FGG/SMTNL2/FGA/EGFR/OXTR/HRH2/KCNMB4/CAV1/ADRA1D/AGTR1/DBH/TBXA2R/TRPM4/AVPR1A/ECE1/LEP/ATP1A2/KCNA5/GJA1/PER2/ADM/ICAM1/P2RX1/EDN3/EDN1 |
| GOBP_REGULATION_OF_ACTIN_FILAMENT_BASED_PROCESS | GOBP_REGULATION_OF_ACTIN_FILAMENT_BASED_PROCESS | 348 | -0.310744476 | -1.529328647 | 0.000172814 | 0.003479887 | 0.002680617 | 2350 | tags=20%, list=15%, signal=18% | SPTBN1/ID1/MET/RYR2/CAV1/AKAP13/S1PR1/DBN1/SHANK3/CCL11/RGS4/WDR1/SPTBN4/SLC9A1/WASF2/RAC1/TRPM4/ARHGEF19/CX3CL1/ODAM/ARHGDIA/CNN2/PPM1E/PDE4B/PROX1/CCR7/RHOD/CDC42EP2/ESAM/C15orf62/RND3/FHOD3/PDPN/NTRK3/PLEKHG2/TMOD4/ABL2/EFNA5/ATP1A2/CCL21/C9orf72/ELN/PDE4D/GPM6B/ANK2/SMAD3/CCL26/ATP2A1/RND2/TMOD1/CSF3/CDC42EP3/MYADM/ARHGEF5/GATA4/TAC1/NPHS1/ICAM1/RHOB/HCN4/CDC42EP1/SYNPO2L/STC1/LPAR1/TACSTD2/EDN1/SDC4/TGFB3/RND1/FAM107A/VIL1 |
| GOBP_SPROUTING_ANGIOGENESIS | GOBP_SPROUTING_ANGIOGENESIS | 113 | -0.418053157 | -1.753836467 | 0.00017416 | 0.003496137 | 0.002693134 | 3974 | tags=38%, list=26%, signal=29% | RAMP2/ADAMTS9/EPN1/NR2E1/EPHB4/SEMA3E/HDAC7/KDR/YJEFN3/AKT1/MAP3K3/LOXL2/JMJD6/FGFBP1/ALOX5/ESM1/ABL1/GHRL/IL12A/SEMA6A/SPRED1/HMOX1/STARD13/AGTR1/NRARP/TBXA2R/PGF/EFNB2/KLF2/VEGFA/CEACAM1/GHSR/CDH13/VEGFC/FOXC2/SRF/EGR3/IL10/THBS1/KLF4/PTGS2/NR4A1/EPHA2 |
| GOBP_EPITHELIAL_CELL_DEVELOPMENT | GOBP_EPITHELIAL_CELL_DEVELOPMENT | 191 | -0.358433095 | -1.64197719 | 0.000174836 | 0.003498869 | 0.002695239 | 2806 | tags=30%, list=18%, signal=25% | NTRK1/YAP1/PALLD/SIX3/ADIPOQ/SPDEF/SOX8/PKHD1/MET/HOXA5/MAGI2/WNT7B/SLC9A4/ASXL1/E2F4/PDZD7/VCL/BMP6/SLC9A3R1/ROS1/CXCR4/NKX2-2/PDGFB/PROX1/DNASE1L2/BMP15/PLCB1/SLC4A7/GRHL2/COL15A1/ACTA2/CRYGB/JAG1/GSTM3/VEGFA/RAPGEF1/STRC/PDE4D/PODXL/TMOD1/CDKN1A/HOXA13/MYADM/GPR4/LHFPL5/NPHS1/ICAM1/S1PR2/FOXC2/B4GALT1/TNFRSF1A/STC1/IL1B/KLF5/SFN/FOSL2/EPHA2 |
| GOBP_NEPHRON_EPITHELIUM_DEVELOPMENT | GOBP_NEPHRON_EPITHELIUM_DEVELOPMENT | 106 | -0.426345294 | -1.764896967 | 0.000176081 | 0.003506552 | 0.002701157 | 3211 | tags=38%, list=21%, signal=30% | FOXJ1/POU3F3/LHX1/TCF21/FGF8/PTCH1/YAP1/CD34/WWTR1/ADIPOQ/SOX8/NOG/WNK4/HOXA11/MAGI2/WNT7B/HES1/GLI3/ASXL1/GZF1/CITED1/SIX4/TFAP2B/BMP2/JAG1/VEGFA/GATA3/HES5/PODXL/IRX2/ADAMTS16/WT1/NPHS1/FOXC2/OSR1/IRX3/TACSTD2/LIF/FOXC1/MYC |
| GOBP_RESPONSE_TO_CORTICOSTERONE | GOBP_RESPONSE_TO_CORTICOSTERONE | 20 | -0.706850712 | -2.066295151 | 0.000176301 | 0.003506552 | 0.002701157 | 525 | tags=40%, list=3%, signal=39% | TH/UCN3/AVPR1A/CDKN1A/TRH/FOSL1/FOS/FOSB |
| GOBP_QUINONE_METABOLIC_PROCESS | GOBP_QUINONE_METABOLIC_PROCESS | 31 | 0.59974691 | 1.946389033 | 0.000177983 | 0.003529189 | 0.002718595 | 3476 | tags=42%, list=22%, signal=33% | AKR1B10/COQ10A/AKR1A1/AIFM2/AKR1B1/CRYZL1/NDUFA9/PDSS2/CYP4F2/COQ3/CBR4/COQ5/COQ7 |
| GOCC_AZUROPHIL_GRANULE | GOCC_AZUROPHIL_GRANULE | 139 | 0.387945035 | 1.717307681 | 0.000180804 | 0.003574183 | 0.002753255 | 3157 | tags=33%, list=20%, signal=27% | FABP5/FRK/DSN1/CTSG/BST2/PIGR/MANBA/MGST1/PLAC8/CPPED1/AGA/STX7/CKAP4/TMEM30A/HEXA/GM2A/VAMP8/GLB1/TXNDC5/DNAJC13/PSMD1/LAMP2/PYGB/ACTR10/NHLRC3/MAGT1/FUCA1/CD63/PTGES2/PSEN1/ACTR2/DNAJC3/DDOST/GLA/SDCBP/SNAP23/DYNC1H1/GGH/DPP7/CTSC/CMTM6/LAMP1/TOLLIP/ANXA2/HEXB/GLIPR1 |
| GOBP_REGULATION_OF_ENDOTHELIAL_CELL_MIGRATION | GOBP_REGULATION_OF_ENDOTHELIAL_CELL_MIGRATION | 156 | -0.389704718 | -1.725428426 | 0.000183325 | 0.003613007 | 0.002783161 | 2674 | tags=25%, list=17%, signal=21% | FGF4/SIRT1/ABL1/ANGPT2/JUP/SPRED1/MET/ANXA3/HMOX1/STARD13/RAC1/TBXA2R/MAP2K3/NFE2L2/DNAJA4/PDGFB/PROX1/BCAR1/TGFB1/FOXP1/VEGFA/GATA3/CEACAM1/SEMA4A/ATP2B4/CXCL13/NOS3/VEGFC/ANGPT4/FGFR1/RHOB/FOXC2/STC1/EDN1/THBS1/KLF4/PTGS2/EPHA2/ZC3H12A |
| GOCC_NEURON_PROJECTION_TERMINUS | GOCC_NEURON_PROJECTION_TERMINUS | 124 | -0.404406123 | -1.728042143 | 0.000185241 | 0.003639698 | 0.002803722 | 4063 | tags=44%, list=26%, signal=33% | SNCB/SLC1A1/PACSIN1/SLC17A8/PTPRN2/DLG4/KCNA2/DRD2/GRIN1/SNCG/SCRG1/CCK/ITGA2/FLRT1/CABP4/SYT4/SLC32A1/PNOC/CALB2/NTSR1/PTPRN/BSN/TANC1/SYP/GCH1/TH/ATCAY/UCN3/GRIK3/KCNC2/GAD1/CDH8/PTPN9/ELK1/GLRA1/PDYN/GRIK5/CRHR2/GHRH/SLC8A3/TNN/CHRM1/TPBG/NTRK2/KCNA1/GOT1/PENK/FLRT3/CNGB1/SLC4A8/CPLX1/ADCYAP1/CPLX3/CALCA/SLC8A2 |
| GOBP_CELLULAR_RESPONSE_TO_MOLECULE_OF_BACTERIAL_ORIGIN | GOBP_CELLULAR_RESPONSE_TO_MOLECULE_OF_BACTERIAL_ORIGIN | 180 | -0.371073166 | -1.6893211 | 0.000186023 | 0.003644025 | 0.002807055 | 2594 | tags=28%, list=17%, signal=24% | ABL1/HAMP/CEBPB/RELA/NFKBIA/CD14/FZD5/LDOC1/AKAP8/NFKBIB/IRAK1/IRF8/BMP6/TBXA2R/IL24/TICAM1/CXCL5/CX3CL1/TNFRSF1B/PDE4B/CEBPE/NOD2/TNIP2/IL1A/LILRB2/TGFB1/CXCL6/LBP/IRAK2/GHSR/TNFAIP3/TRIB1/CXCL13/CSF3/CD274/SIRPA/CCL3/ICAM1/TNIP3/IL10/SBNO2/CXCL2/PPARGC1A/IL1B/CXCL1/NR1D1/CCL2/ZFP36/SERPINE1/ZC3H12A/IL6 |
| GOBP_REGULATION_OF_AMPA_RECEPTOR_ACTIVITY | GOBP_REGULATION_OF_AMPA_RECEPTOR_ACTIVITY | 22 | -0.677154925 | -2.017140235 | 0.000192868 | 0.003766726 | 0.002901574 | 2677 | tags=55%, list=17%, signal=45% | SHANK1/CACNG5/ARC/CNIH3/SHANK3/NLGN3/GSG1L/NLGN1/CACNG3/ADRB2/CACNG7/CACNG2 |
| GOMF_HISTONE_BINDING | GOMF_HISTONE_BINDING | 202 | 0.352357862 | 1.640716014 | 0.000193543 | 0.003768566 | 0.002902991 | 3672 | tags=36%, list=24%, signal=28% | NCAPG2/ING4/SPHK2/NPM2/ASF1A/TDRD3/ING2/ANP32A/RCC1/CBX8/VRK1/MCM2/ATAD2B/PHF10/ANP32E/JMJD7/KDM5A/NCAPD2/DAXX/UHRF2/RNF20/PRMT7/ZCWPW2/MSL3/CBX4/RBBP4/TP53BP1/CBX5/PARP9/YEATS2/NPM1/BCAS3/CKS1B/CHAF1B/PRKCB/HJURP/PHF6/SAMD1/NAP1L3/SART3/TNKS/NAP1L1/MPND/DPF2/ATRX/KDM5B/KAT5/SBNO1/USP51/ATAD2/TAF1/TRIM24/SPIN1/CKS2/SAP30L/RBBP5/WDR5B/SCML2/USP15/KDM1B/BRD7/SAMD11/ASF1B/SAMD13/ING3/NCAPD3/RNF8/CBX2/SUZ12/NAP1L4/PIH1D1/USP3/RSF1 |
| GOMF_ATPASE_ACTIVITY | GOMF_ATPASE_ACTIVITY | 429 | 0.294435326 | 1.484438374 | 0.000195617 | 0.003797551 | 0.002925319 | 4552 | tags=38%, list=29%, signal=27% | MSH2/TOP2A/ABCC4/FIGNL1/MCM5/DDX3Y/DDX58/ABCG8/KIF22/IFIH1/PMS2/KIF16B/ATAD3C/SPAST/ATP8B1/TOR3A/ATF7IP/RFC1/ABCC6/SMC6/ABCC5/CFTR/MCM6/MYO5C/ABCC9/KATNAL1/MCM2/ATAD2B/ABCA5/IDE/FIGN/ATP8B4/RAD51C/DDX60/DHX58/ABCB4/DDX60L/C10orf88/TMEM30A/ATP11C/YME1L1/RUVBL2/NSF/ACSM2B/RFC3/TMEM30B/ACSM1/DDX49/KIFC1/ACSM5/KIF3A/ATP6V1H/SMARCAD1/DDX6/HELLS/MYO6/RBBP4/SMARCAL1/ATP10D/RAD17/MYO5A/TAP2/TRIP13/KIF21A/HSPA5/MYH7/ASCC3/MYO7A/ABCD2/ERCC6/ACSM3/RNF213/TTF2/SLFN11/XRCC3/PMS1/SPATA5/CHTF8/RFC5/MLH1/KIF3B/ABCD3/KIF11/ACSF2/TAPBP/ABCA3/ATRX/KIF20A/KIFC3/DHX33/DYNC1H1/RECQL/MYO1D/ATP6V1A/PEX1/HELZ/LMBRD1/DHX57/PSMC6/ATP9A/ATAD2/VPS4B/RHOBTB3/ABCB1/RFC4/PSMC4/HLTF/CHTF18/RUVBL1/BCS1L/XRCC5/PSMC3/ATP2C1/NVL/MYO5B/VCP/CENPE/DSCC1/ABCB7/MYO1E/ATP2A3/DHX29/SETX/DHX40/RALBP1/DDX17/DDX11/ATAD1/XRCC2/MCM8/ATP13A2/CHD1L/MCM4/MYH14/ERCC3/FANCM/KIF2A/ABCC2/KIF2C/KIF20B/ATP6V1F/ABCB8/CHD4/HELQ/PSMC5/HSP90AA1/RAD50/GTF2F2/RAD54B/MYL6/KIF12/ACSL1/RECQL4/DHX9/KATNA1/DDX1/RAD54L/AQR/OLA1/ATP7A/MYO1B |
| GOMF_SODIUM_ION_TRANSMEMBRANE_TRANSPORTER_ACTIVITY | GOMF_SODIUM_ION_TRANSMEMBRANE_TRANSPORTER_ACTIVITY | 136 | -0.397101172 | -1.714770948 | 0.000197032 | 0.003813605 | 0.002937686 | 2635 | tags=36%, list=17%, signal=30% | SLC5A7/SLC38A1/CACNA1I/GRIK4/SLC5A4/SCN5A/SLC6A20/SCN2B/SLC12A2/CACNA1G/SLC24A3/SLC13A4/GRIK3/SLC6A4/SLC9A4/SLC9A1/SLC6A6/SLC5A6/SCN3B/SLC38A2/ATP4A/SLC34A3/SLC20A1/SLC13A5/GRIK5/SLC8A3/SLC9A8/SLC4A7/SLC22A3/SLC13A2/SCN1A/SLC5A11/SLC3A2/TPCN1/SCNN1A/SLC6A11/SCN9A/SLC5A8/ATP1A2/SLC24A4/SLC24A2/SLC4A8/SLC5A1/SCN7A/HCN4/SLC23A2/SLC8A2/SCNN1B/KCNK1 |
| GOBP_REGULATION_OF_MITOTIC_SISTER_CHROMATID_SEGREGATION | GOBP_REGULATION_OF_MITOTIC_SISTER_CHROMATID_SEGREGATION | 42 | 0.559358001 | 1.937851123 | 0.000198083 | 0.00382253 | 0.002944561 | 3850 | tags=57%, list=25%, signal=43% | NDC80/CDK5RAP2/PTTG1/MAD2L1/ZWINT/BUB1/GEN1/IK/AURKB/CDT1/APC/KLHL22/TRIP13/MAD2L2/KNTC1/XRCC3/DYNC1LI1/CDC20/BUB3/PSMG2/LCMT1/ATM/BECN1/ZW10 |
| GOBP_PROTEIN_KINASE_B_SIGNALING | GOBP_PROTEIN_KINASE_B_SIGNALING | 234 | -0.343461029 | -1.615516596 | 0.000203755 | 0.003914024 | 0.00301504 | 2915 | tags=29%, list=19%, signal=24% | MST1R/MYOC/TNFSF11/FGF8/NTRK1/INSR/C1QTNF1/DRD3/EREG/GRM2/FGF4/SIRT1/MT3/MSTN/FGF6/PKHD1/MFHAS1/MET/MAGI2/TPTE/FGF22/FGF10/CRYBA1/RAC1/PPP2R5B/FGF5/SLC9A3R1/CX3CL1/PEAR1/LRP2/NKX3-1/PDGFB/CCR7/HYAL2/F3/NTRK3/TPBG/TGFB1/LEP/NTRK2/LOX/GATA3/IGF1/RAPGEF1/CCL21/FAM110C/THPO/SPRY2/CSF3/FGF9/TCF7L2/GATA4/CCL3/TYRO3/FGFR1/CASS4/KL/TNFAIP8L3/OSM/CD19/IRS2/IL1B/HBEGF/THBS1/KLF4/CCL2/EPHA2 |
| GOBP_POSITIVE_REGULATION_OF_VASCULAR_ASSOCIATED_SMOOTH_MUSCLE_CELL_PROLIFERATION | GOBP_POSITIVE_REGULATION_OF_VASCULAR_ASSOCIATED_SMOOTH_MUSCLE_CELL_PROLIFERATION | 31 | -0.606191839 | -1.960772388 | 0.000204031 | 0.003914024 | 0.00301504 | 1398 | tags=35%, list=9%, signal=32% | PDGFB/MMP2/IGF1/GJA1/FGF9/NR4A3/IL10/JUN/ERN1/EDN1/ADAMTS1 |
| GOBP_NEGATIVE_REGULATION_OF_COAGULATION | GOBP_NEGATIVE_REGULATION_OF_COAGULATION | 50 | -0.513932854 | -1.865527216 | 0.000208181 | 0.003981841 | 0.003067281 | 800 | tags=20%, list=5%, signal=19% | CEACAM1/PLAT/NOS3/CD9/PLAUR/SERPINB2/THBD/EDN1/THBS1/SERPINE1 |
| GOBP_ENDOTHELIAL_CELL_MIGRATION | GOBP_ENDOTHELIAL_CELL_MIGRATION | 199 | -0.358539642 | -1.651411554 | 0.000216299 | 0.004099989 | 0.003158292 | 2674 | tags=24%, list=17%, signal=20% | FGF4/SIRT1/ABL1/ANGPT2/JUP/SPRED1/ID1/MET/ANXA3/HMOX1/STARD13/PTP4A3/RAC1/TBXA2R/MAP2K3/NFE2L2/S100A2/DNAJA4/EFNB2/PDGFB/PROX1/BCAR1/TGFB1/FOXP1/VEGFA/GATA3/CEACAM1/CDH13/SEMA4A/ATP2B4/CXCL13/NOS3/VEGFC/ANGPT4/FGFR1/RHOB/FOXC2/SRF/EGR3/STC1/EDN1/THBS1/KLF4/S100P/PTGS2/NR4A1/EPHA2/ZC3H12A |
| GOBP_RESPONSE_TO_PURINE_CONTAINING_COMPOUND | GOBP_RESPONSE_TO_PURINE_CONTAINING_COMPOUND | 139 | -0.38572303 | -1.673580471 | 0.000216447 | 0.004099989 | 0.003158292 | 3134 | tags=29%, list=20%, signal=24% | HCN2/DUOX1/WNT10B/PCK1/ASS1/PTPRN/TYR/ADIPOQ/AGXT/RELA/P2RY1/RYR2/P2RY4/CASQ2/SRD5A1/CNGA3/SLC6A4/DNTT/EEF2K/CIB2/TRPM4/CITED1/PANX1/DUSP1/LDHA/SLC8A3/PDE3A/DHODH/RAPGEF1/PENK/WT1/MMP19/HCN4/P2RX1/JUN/STC1/PPARGC1A/THBD/FOSL1/FOS/FOSB |
| GOBP_CYTOSOLIC_TRANSPORT | GOBP_CYTOSOLIC_TRANSPORT | 140 | 0.386244858 | 1.715835424 | 0.000216813 | 0.004099989 | 0.003158292 | 4754 | tags=49%, list=31%, signal=35% | AKTIP/GOSR1/WIPI1/KIF16B/STX8/VPS11/HEATR5A/VTI1B/VPS13C/LRRK2/SNX2/TBC1D23/ARFIP1/VAMP3/SYT7/DNAJC13/SNX12/SNX5/GOSR2/ARL1/TBC1D10A/ACTR2/SNX1/ANKRD27/STX10/MAPK3/CLTC/VPS54/ARFRP1/MYO1D/CCDC91/GBF1/LAMP1/VPS35/RHOBTB3/CLN5/PLEKHJ1/TBC1D10B/STX16/TBC1D10C/WDR91/VPS26A/CES1/SNX6/VPS29/SGSM2/BECN1/STX5/CORO1A/VPS52/YKT6/ERC1/SNX3/EEA1/MSN/HOOK3/STX6/MAP2K1/CLTCL1/USP7/TMEM87B/RAB21/MON2/BET1L/TBC1D14/CLN3/RAB14/GCC2/SNX16 |
| GOCC_PERIKARYON | GOCC_PERIKARYON | 142 | -0.3912642 | -1.700998738 | 0.000216887 | 0.004099989 | 0.003158292 | 4408 | tags=46%, list=28%, signal=34% | WDFY3/CACNA1F/CPNE5/KCND2/HTR5A/NDN/SLC1A1/TIAM2/CRMP1/SLC17A8/KCNA2/DRD2/OLFM1/CCK/LRIT3/MAP2K4/PTPRS/GAP43/CRH/NPPA/KNDC1/GRIP1/ITGA8/NTSR1/ASS1/BRD1/PTPRN/DDN/GLRA3/SLC5A7/CTNND2/OPN4/FZD5/VIP/DMWD/TH/ASTN1/NGB/CNGA3/GRIK3/MAP1B/KCNC2/PDE9A/SEMA4F/RCVRN/GLRA1/GRIK5/DRP2/GHRH/SLC8A3/CPNE6/KCNB2/KCNA1/KIF5A/C9orf72/CRYAB/PENK/KCNC3/CHRNA10/HPCA/CPLX1/PRPH/ADCYAP1/SLC2A3/SLC8A2/KCNK1 |
| GOBP_EMBRYONIC_ORGAN_DEVELOPMENT | GOBP_EMBRYONIC_ORGAN_DEVELOPMENT | 390 | -0.302802406 | -1.505381904 | 0.00021908 | 0.004129407 | 0.003180953 | 3982 | tags=34%, list=26%, signal=26% | DLX5/POLE/PTK7/CCDC39/IL3/VASH2/HEY2/MMP16/RBBP6/GDNF/CDX2/CLRN1/GRHL3/WNT1/USH1C/GNAS/NES/DSCAML1/PITX2/IFT57/C2CD3/SOX15/NAGLU/KDR/TBX22/KRT19/ZFP36L1/TPO/GBX2/AKT1/PCSK5/EFNA1/PPP1R13L/NKX2-5/GJB6/HOXD9/LHX1/ALX1/TCF21/ATF4/CHRNA9/FOXI1/FGF8/HOXB9/PTCH1/OTX1/YAP1/ATP8A2/SIX3/FBN2/NCOA1/CEBPB/HOXD10/CDX4/ACVR1/HEY1/NOG/TFAP2A/FZD5/HOXA3/HOXA11/HOXA9/ADA/RYR2/HOXA5/HOXC9/TH/TGFB2/WNT7B/HES1/FZD6/GLI3/PHLDA2/FGF10/USH1G/PBX4/MYO3B/PDGFC/PHACTR4/MYO3A/PDZD7/WNT3A/ATOH1/CITED1/SLC9A3R1/PAX5/SLC44A4/PDGFB/TGFBR2/PROX1/ATP6V1B1/TUBB2B/SIX4/GCM1/GRHL2/TEAD3/HMX2/PRRX1/HIPK2/TGFB1/VEGFA/GATA3/HAND1/STRC/VANGL2/NDST1/SMAD3/CHRNA10/ALDH1A3/HOXB1/SPRY2/ALX4/ADM/GATA4/LHFPL5/SOX11/EPAS1/TEAD2/FOXC2/SRF/OSR1/LRIG1/MSX1/IL10/TEAD4/POU4F3/SOX17/EDN1/LIF/TGFB3/FOXC1/SOCS3/EPHA2/JUNB |
| GOBP_NEGATIVE_REGULATION_OF_ALPHA_BETA_T_CELL_ACTIVATION | GOBP_NEGATIVE_REGULATION_OF_ALPHA_BETA_T_CELL_ACTIVATION | 37 | -0.571882445 | -1.929045362 | 0.00022126 | 0.004149091 | 0.003196116 | 686 | tags=19%, list=4%, signal=18% | JAK3/CD274/ARG2/BCL6/IL4R/SOCS1/ZC3H12A |
| GOBP_SA_NODE_CELL_TO_ATRIAL_CARDIAC_MUSCLE_CELL_COMMUNICATION | GOBP_SA_NODE_CELL_TO_ATRIAL_CARDIAC_MUSCLE_CELL_COMMUNICATION | 11 | -0.787849212 | -1.903150126 | 0.000221521 | 0.004149091 | 0.003196116 | 2463 | tags=73%, list=16%, signal=61% | SCN5A/RYR2/CACNA1G/SCN3B/GJC1/KCNA5/ANK2/HCN4 |
| GOBP_CELLULAR_RESPONSE_TO_EXTERNAL_STIMULUS | GOBP_CELLULAR_RESPONSE_TO_EXTERNAL_STIMULUS | 269 | -0.328891696 | -1.572492447 | 0.000222044 | 0.004149091 | 0.003196116 | 2231 | tags=23%, list=14%, signal=20% | VDR/CDKN2B/AQP3/GCGR/HMOX1/PHEX/SRD5A1/PRKAG3/KRT20/UCN3/SLC9A1/BAG3/MYH13/RAC1/SLC38A2/BMP6/AVPR1A/NFE2L2/SLC38A3/MN1/CNN2/PMAIP1/FOXO3/MAP1LC3C/CYP24A1/LEP/BRSK1/HABP4/GOT1/ATP1A2/TNFRSF10B/UPP1/KLF10/IRF1/CPEB4/PENK/LTBR/TNFRSF8/MAP1LC3B/CYP27B1/GJA1/CDKN1A/DAPL1/TNFSF14/ATF3/ICAM1/MAG/NUAK2/SRF/TNFRSF1A/RNF152/JUN/MAP3K14/IL1B/INHBB/FOXO1/PIM1/SIK1/NR4A2/FAM107A/FOSL1/ZC3H12A/FOS |
| GOMF_ISOMERASE_ACTIVITY | GOMF_ISOMERASE_ACTIVITY | 138 | 0.387727212 | 1.710687292 | 0.000225172 | 0.004195453 | 0.003231829 | 3806 | tags=41%, list=24%, signal=31% | TOP2A/PIN4/FKBP14/HMGCS1/AMACR/DHRS9/LSS/IDI1/SPAST/CRELD2/PDIA6/PPIF/FKBP9/CFTR/PIGK/FKBP3/KATNAL1/GALM/TRUB1/PPIH/PBLD/CRELD1/HYI/RPUSD3/FKBP2/TXNDC5/EBP/PPIC/PPIE/PGAM1/PDIA3/SRR/GNPDA1/PUS10/MPI/PTGES2/EHHADH/PPIL3/PPIAL4A/MIF/PPIA/PUS7L/PUS3/PGM3/NKTR/BPGM/MCEE/PGAM2/HPGDS/PDIA4/TOP1MT/HSD3B1/DDT/ECH1/RPE/PTGIS/PGAM4 |
| GOBP_ASTROCYTE_DIFFERENTIATION | GOBP_ASTROCYTE_DIFFERENTIATION | 69 | -0.481221455 | -1.85072941 | 0.000229631 | 0.004260254 | 0.003281747 | 2594 | tags=39%, list=17%, signal=33% | ABL1/MT3/MAPT/SOX8/NOG/HES1/TSPAN2/STAT3/IFNGR1/FPR2/TTBK1/PLP1/NKX2-2/POU3F2/GCM1/BMP2/HES5/S100A9/S100A8/GPR37L1/C5AR1/MAG/LDLR/NR1D1/LIF/CLCF1/IL6 |
| GOBP_REGULATION_OF_VASCULAR_PERMEABILITY | GOBP_REGULATION_OF_VASCULAR_PERMEABILITY | 40 | -0.548693628 | -1.904297676 | 0.000229964 | 0.004260254 | 0.003281747 | 1751 | tags=28%, list=11%, signal=24% | BMP6/AZU1/PDE3A/TGFB1/VEGFA/CEACAM1/ADM/GPR4/AKAP12/C2CD4A/C2CD4B |
| GOBP_NEGATIVE_REGULATION_OF_INTRACELLULAR_SIGNAL_TRANSDUCTION | GOBP_NEGATIVE_REGULATION_OF_INTRACELLULAR_SIGNAL_TRANSDUCTION | 428 | -0.294701821 | -1.481393739 | 0.000231813 | 0.004270259 | 0.003289454 | 2925 | tags=24%, list=19%, signal=20% | UBE2B/CHRNA9/MYOC/DUSP7/MTNR1B/SOD2/ZNF385A/USP10/DRD3/CBLC/DUSP26/SIRT1/ADIPOQ/DGKG/ABL1/SPRY3/WWC3/RELA/MSTN/SEMA6A/SPRED1/TRAP1/MCL1/PKHD1/DUSP19/MET/WNK2/CAV1/MAGI2/PRDM15/RGS14/TGFB2/PDZD3/RGS4/PTPN1/CRYBA1/SPRY1/PPP2R5B/NLRP12/MAP2K3/RASA4/NCOR1/SLC9A3R1/NFE2L2/RCAN1/LMO3/RFFL/PPEF2/DUSP1/DUSP16/DUSP9/PSCA/HYAL2/DDX3X/DUSP21/PDE3A/TIMP3/IVNS1ABP/ABL2/SEC14L1/SPRED2/DUSP10/CRTC3/RAPGEF1/DACT1/KCTD13/FBLN1/PDE4D/TNFAIP3/IRAK3/DUSP5/SH3BP4/ATP2B4/ITPR1/EPO/CHRNA10/SPRY2/SIRPA/MYADM/C1QL4/CSK/ATF3/DUSP8/TNIP3/PLAUR/DUSP6/RNF152/CIT/RASIP1/LPAR1/IL1B/NR1D1/FOXO1/RGS2/LIF/SPRY4/THBS1/KLF4/BCL6/EPHA2/MYC/ZC3H12A |
| GOBP_CELL_PROLIFERATION_INVOLVED_IN_METANEPHROS_DEVELOPMENT | GOBP_CELL_PROLIFERATION_INVOLVED_IN_METANEPHROS_DEVELOPMENT | 10 | -0.809192788 | -1.892961745 | 0.00023201 | 0.004270259 | 0.003289454 | 440 | tags=40%, list=3%, signal=39% | WT1/OSR1/MYC/EGR1 |
| GOBP_POSITIVE_REGULATION_OF_SYNAPTIC_TRANSMISSION | GOBP_POSITIVE_REGULATION_OF_SYNAPTIC_TRANSMISSION | 139 | -0.384354101 | -1.667640942 | 0.00023248 | 0.004270259 | 0.003289454 | 3936 | tags=40%, list=25%, signal=30% | GRIN2C/DLG4/RIMS1/DRD2/NR2E1/RIMS2/YTHDF1/GIP/STAU1/NRXN1/CRH/AGER/CHRNA7/EGFR/OXTR/CALB2/GRIN2D/NTRK1/SHANK1/IGSF11/ABL1/CYP46A1/HAP1/CACNG5/STX1B/STX1A/CLSTN2/ARC/RGS14/RETN/SHANK3/NPTN/NFATC4/CRHR2/LRRTM2/NLGN3/SLC8A3/LILRB2/NTRK2/MPP2/TSHZ3/KCTD13/SYT12/NLGN1/SLC24A2/CACNG3/SLC4A8/TAC1/CACNG7/CACNG2/ADCYAP1/TNR/SLC8A2/CCL2/FAM107A |
| GOBP_CELL_PROLIFERATION_INVOLVED_IN_KIDNEY_DEVELOPMENT | GOBP_CELL_PROLIFERATION_INVOLVED_IN_KIDNEY_DEVELOPMENT | 19 | -0.688718575 | -1.972189873 | 0.000239711 | 0.004390632 | 0.003382179 | 1398 | tags=37%, list=9%, signal=34% | PDGFB/BMP2/GATA3/WT1/OSR1/MYC/EGR1 |
| GOBP_NEUROPEPTIDE_SIGNALING_PATHWAY | GOBP_NEUROPEPTIDE_SIGNALING_PATHWAY | 100 | -0.42889983 | -1.750219146 | 0.000244163 | 0.004459591 | 0.0034353 | 3105 | tags=35%, list=20%, signal=28% | SSTR3/NPPA/PNOC/GALP/NTSR1/TAC3/NPW/GLRA3/NPBWR2/SSTR5/CARTPT/QRFPR/PRLHR/MC2R/ECEL1/NPY/GPR83/GPR139/NPFFR2/LTB4R/GPR149/SORCS1/GLRA1/PDYN/NPSR1/NPFFR1/GLRA2/PYY/PPY/PENK/TAC1/TYRO3/ADCYAP1/CALCA/PROK2 |
| GOBP_REGULATION_OF_ANATOMICAL_STRUCTURE_SIZE | GOBP_REGULATION_OF_ANATOMICAL_STRUCTURE_SIZE | 444 | -0.293569161 | -1.483082923 | 0.000245536 | 0.004472073 | 0.003444915 | 2595 | tags=23%, list=17%, signal=19% | WAS/ABL1/MT3/SIN3A/SEMA6A/SEMA3C/SEMA6C/P2RY1/KCNMB4/MAPT/SLC12A9/SPTBN1/MAP2/GCH1/CAV1/ADRA1D/TRIM46/DBN1/SLC12A2/SHANK3/AGTR1/CCL11/ZFYVE27/WDR1/KIAA0319/KEL/SLC6A4/SEMA3D/MAP1B/SPTBN4/ASXL1/WASF2/DBH/RAC1/E2F4/WNT3A/DRD5/TBXA2R/TRPM4/SEMA4F/AVPR1A/ISLR2/SLC9A3R1/SEMA3B/CCR7/CDC42EP2/ESAM/RIN3/ECE1/SEMA3A/C15orf62/FHOD3/ACTA2/PLEKHG2/POU4F2/ADRB1/LEP/TMOD4/KLF2/VEGFA/ATP1A2/ADRB3/CCL21/ELN/DCC/CRP/KCNA5/SEMA4A/CCL26/RND2/NOS1/TMOD1/GJA1/PER2/CSF3/PLXNA3/CDC42EP3/MYADM/NOS3/ADM/ADRB2/NPHS1/ICAM1/MAG/WNT3/FOXC2/SEMA4B/P2RX1/SRF/CDH4/CDC42EP1/EDN3/CALCA/TNR/EDN1/RGS2/SCNN1B/FOXC1/PPP1R15A/VIL1 |
| GOCC_MEMBRANE_COAT | GOCC_MEMBRANE_COAT | 79 | 0.462801362 | 1.858329589 | 0.000247877 | 0.004502059 | 0.003468014 | 4274 | tags=47%, list=27%, signal=34% | CHMP4A/KLHL12/VPS41/AP1S1/AP3M1/AP3M2/SEC13/COPZ1/SEC23B/SEC24A/SEC24D/CHMP2A/SEC23A/CLTA/COPB2/CLINT1/AP3S1/COPZ2/VPS39/AP2B1/AFTPH/SEC31A/BAIAP2L2/CLTC/ARL6/SAR1B/SYNJ1/NECAP2/COPB1/SAR1A/VPS33A/SEC24C/SEC31B/AP3B1/SEC24B/AP1B1/CLTCL1 |
| GOBP_CHEMICAL_SYNAPTIC_TRANSMISSION_POSTSYNAPTIC | GOBP_CHEMICAL_SYNAPTIC_TRANSMISSION_POSTSYNAPTIC | 101 | -0.424111439 | -1.734251108 | 0.000253465 | 0.004590681 | 0.003536281 | 3936 | tags=47%, list=25%, signal=35% | GRIN2C/DLG4/CHRNA5/RIMS1/DRD4/NPAS4/DRD2/RIMS2/CHRNG/GRIN1/CHRNB4/AKT1/NRXN1/CHRNA7/CHRNB2/CHRNA9/NTSR1/GRIN2D/CHRNA3/SHANK1/DMPK/GLRA3/IGSF11/GHRL/CHRNA4/STX1B/CHRNA6/STX1A/CBLN1/SHANK3/RGS4/TMEM108/GLRA1/GRIK5/NLGN3/SLC8A3/GLRA2/CUX2/MPP2/TMEM25/SEZ6/NLGN1/CHRNA10/ADRB2/S1PR2/P2RX1/SLC8A2 |
| GOBP_PHOSPHOLIPID_BIOSYNTHETIC_PROCESS | GOBP_PHOSPHOLIPID_BIOSYNTHETIC_PROCESS | 246 | 0.332970346 | 1.585356906 | 0.000255881 | 0.004621533 | 0.003560047 | 2980 | tags=26%, list=19%, signal=21% | GPAM/FABP5/FADS1/HMGCS1/SPHK2/DHDDS/MTMR4/MVK/GPD1/PLA2G1B/HTR2B/PIGF/PNPLA3/IDI1/ACP6/PIGB/IDH1/SERAC1/PMVK/SLC44A3/MVD/PLD6/MTM1/PIGK/DOLPP1/PITPNM2/PIK3R1/DDHD1/PIP4K2B/MPPE1/PIK3C2G/RAB4A/SACM1L/SPTLC2/CEPT1/PDGFA/PIGY/STARD10/PIK3R2/LCLAT1/PIGN/PLD1/PLA2G4A/AGPAT5/FIG4/DPM3/INPP5D/CRLS1/DOLK/SH3YL1/PIGP/GNPAT/LPCAT2/PCTP/NR1H4/PI4K2B/PLA2G4C/ABHD8/PIGV/PIP4K2C/ARF3/PTEN/PIK3R3/AGPAT1 |
| GOCC_ENDOPLASMIC_RETICULUM_EXIT_SITE | GOCC_ENDOPLASMIC_RETICULUM_EXIT_SITE | 24 | 0.650444262 | 1.996835244 | 0.000256792 | 0.004625117 | 0.003562808 | 4096 | tags=79%, list=26%, signal=58% | MIA3/LRRK2/TFG/MPPE1/SEC23B/MIA2/SEC24A/SEC24D/YIPF5/SEC23A/SEC31A/HLA-A/SEC16B/SAR1B/PDCD6IP/SAR1A/SEC24C/SEC31B/SEC24B |
| GOBP_NEGATIVE_REGULATION_OF_METAPHASE_ANAPHASE_TRANSITION_OF_CELL_CYCLE | GOBP_NEGATIVE_REGULATION_OF_METAPHASE_ANAPHASE_TRANSITION_OF_CELL_CYCLE | 39 | 0.56334092 | 1.933311514 | 0.000258115 | 0.004636062 | 0.003571238 | 3444 | tags=54%, list=22%, signal=42% | NDC80/CDK5RAP2/MAD2L1/ZWINT/BUB1/GEN1/IK/AURKB/CDT1/APC/KLHL22/TRIP13/MAD2L2/KNTC1/XRCC3/DYNC1LI1/CDC20/BUB3/PSMG2/LCMT1/ATM |
| GOBP_POSITIVE_REGULATION_OF_EPITHELIAL_CELL_PROLIFERATION | GOBP_POSITIVE_REGULATION_OF_EPITHELIAL_CELL_PROLIFERATION | 169 | -0.364946339 | -1.63850854 | 0.000259821 | 0.004653814 | 0.003584913 | 3017 | tags=29%, list=19%, signal=24% | EGFR/FGFBP1/FOXE3/YAP1/PTPRN/SIRT1/GHRL/SCN5A/NOG/PKHD1/ID1/VIP/HMOX1/AGTR1/CCL11/NRARP/FGF10/BMP6/WNT3A/PGF/REG3G/FZD7/ODAM/PDGFB/PROX1/NOD2/F3/BMP2/VEGFA/IGF1/GHSR/TNFAIP3/CDH13/CCL26/FGF9/TCF7L2/VEGFC/C5AR1/SOX11/FGFR1/NR4A3/OSR1/B4GALT1/EGR3/IL10/LRG1/HAS2/NR4A1/MYC |
| GOBP_TRANSLESION_SYNTHESIS | GOBP_TRANSLESION_SYNTHESIS | 37 | 0.561669296 | 1.906004533 | 0.000264937 | 0.004732379 | 0.003645433 | 4190 | tags=59%, list=27%, signal=44% | ISG15/DTL/PCNA/RFC1/POLE2/POLD1/POLH/RFC3/POLK/POLI/MAD2L2/ZBTB1/RFC5/RPA3/POLD2/RFC4/POLDIP2/VCP/UBE2L6/POLD3/RPS27A/RPA1 |
| GOBP_PRIMARY_ALCOHOL_CATABOLIC_PROCESS | GOBP_PRIMARY_ALCOHOL_CATABOLIC_PROCESS | 13 | 0.750066669 | 2.001179237 | 0.000274067 | 0.004882009 | 0.003760696 | 1989 | tags=46%, list=13%, signal=40% | AKR1B10/SULT1E1/SULT2A1/HAO1/SULT1B1/ALDH1B1 |
| GOBP_PEPTIDYL_ASPARAGINE_MODIFICATION | GOBP_PEPTIDYL_ASPARAGINE_MODIFICATION | 28 | 0.610111146 | 1.95307465 | 0.000278341 | 0.004937 | 0.003803056 | 4678 | tags=71%, list=30%, signal=50% | NUDT14/MGAT2/HIF1AN/DERL3/MAGT1/DPM3/LMAN1/STT3B/OSTC/STT3A/DDOST/FUT8/TUSC3/MCFD2/ALG5/MGAT5/DPM1/RPN2/ASGR2/DPM2 |
| GOBP_GLIAL_CELL_DIFFERENTIATION | GOBP_GLIAL_CELL_DIFFERENTIATION | 197 | -0.356906702 | -1.640683392 | 0.000278677 | 0.004937 | 0.003803056 | 3187 | tags=35%, list=20%, signal=28% | MOBP/ADAM22/EGR2/AGER/EGFR/SKI/IFNG/MYOC/ZNF488/SOX2/DRD3/ASPA/CNTNAP1/ABL1/MT3/PTPRZ1/RELA/NKX2-1/MAPT/SOX8/GPR17/NOG/TNFRSF21/SOX1/HES1/LGI4/GLI3/WDR1/FGF10/ITGB4/ZNF365/TSPAN2/FGF5/STAT3/IFNGR1/FPR2/TTBK1/TNFRSF1B/PLP1/CXCR4/NKX2-2/POU3F2/SLC8A3/GCM1/B4GALT5/BMP2/TGFB1/FA2H/NTRK2/DUSP10/HES5/DAAM2/S100A9/PRDM8/S100A8/GPR37L1/PHOX2B/CSK/C5AR1/DTX1/SOX11/MAG/LDLR/LPAR1/NR1D1/LIF/CLCF1/IL6 |
| GOCC_CULLIN_RING_UBIQUITIN_LIGASE_COMPLEX | GOCC_CULLIN_RING_UBIQUITIN_LIGASE_COMPLEX | 136 | 0.392937494 | 1.733294266 | 0.000281477 | 0.004955738 | 0.00381749 | 5244 | tags=57%, list=34%, signal=38% | ANAPC7/FBXO27/FBXO2/DTL/KLHL12/SKP2/KLHL3/CCNF/FBXO48/CDC23/FZR1/KEAP1/SPOP/USP47/FBXO6/RNF7/KLHL22/KLHL7/DET1/CUL5/FBXO7/ERCC8/MAD2L2/SKP1/CAND1/DDB2/BTRC/CKS1B/RBX1/FBXO25/AMN1/FBXL4/FBXL5/CDKN1B/ANAPC11/FBXL17/ANAPC5/CDC20/GLMN/ANAPC2/CKS2/KLHL13/FBXO4/FBXW5/CDC16/SPOPL/CACYBP/KLHL24/CRBN/FBXO38/SPSB2/CUL7/FBXO17/ANAPC4/FBXO32/ANAPC10/TRIM21/CDC27/KLHL2/FBXW7/FBXL18/CUL1/WDTC1/DCAF16/CUL3/CDC26/FBXL14/ANAPC13/DCAF6/FBXW8/DCAF15/KLHL20/FBXL3/FBXL7/FBXL19/ARIH2/KCTD5/FBXW4 |
| GOBP_MITOTIC_SPINDLE_ORGANIZATION | GOBP_MITOTIC_SPINDLE_ORGANIZATION | 99 | 0.413565203 | 1.740941015 | 0.000282028 | 0.004955738 | 0.00381749 | 4069 | tags=42%, list=26%, signal=32% | NDC80/GNAI1/TUBG2/SPAST/AURKA/TUBG1/RACGAP1/RCC1/GOLGA2/CHMP5/AURKB/KIFC1/STAG1/CHMP2A/NEK2/TACC3/CLASP2/PRC1/NUF2/CENPH/KIF3B/KIF11/TNKS/CEP192/CLTC/DYNC1H1/CHEK2/CDC20/DLGAP5/STMN1/VPS4B/STAG2/WDR62/CHMP1A/VCP/CENPE/DRG1/DCTN6/CEP97/BCCIP/CHMP2B/KIF2A |
| GOCC_ENDOPLASMIC_RETICULUM_GOLGI_INTERMEDIATE_COMPARTMENT | GOCC_ENDOPLASMIC_RETICULUM_GOLGI_INTERMEDIATE_COMPARTMENT | 105 | 0.415628169 | 1.768712986 | 0.000282028 | 0.004955738 | 0.00381749 | 3957 | tags=41%, list=25%, signal=31% | NAT8B/NUCB2/TRIP11/MPP5/STX17/TM6SF2/PDIA6/F8/LMAN2L/GOLGA2/MPPE1/BET1/TMED10/YIF1B/LMAN2/CCDC115/CTSZ/GOSR2/RAB2A/TRAPPC2/TAP2/LRPAP1/HSPA5/COPZ2/LMAN1/CNIH4/ERGIC3/TAPBP/RER1/TMED2/CTSC/NAT8/GBF1/CALR/TMED1/ERGIC2/MCFD2/COPB1/TBC1D20/TMED4/STX5/GOLGB1/YKT6 |
| GOBP_NEGATIVE_REGULATION_OF_MUSCLE_CONTRACTION | GOBP_NEGATIVE_REGULATION_OF_MUSCLE_CONTRACTION | 17 | -0.726765081 | -1.991601248 | 0.000283127 | 0.004961609 | 0.003822013 | 883 | tags=29%, list=6%, signal=28% | ATP1A2/ADRB2/CALCA/RGS2/ZC3H12A |
| GOBP_TYPE_2_IMMUNE_RESPONSE | GOBP_TYPE_2_IMMUNE_RESPONSE | 35 | -0.592001183 | -1.959127079 | 0.000288651 | 0.005036706 | 0.003879861 | 1161 | tags=26%, list=7%, signal=24% | NOD2/BCL6B/GATA3/ARG2/IL10/BCL6/IL4R/BCL3/IL6 |
| GOBP_NITRIC_OXIDE_MEDIATED_SIGNAL_TRANSDUCTION | GOBP_NITRIC_OXIDE_MEDIATED_SIGNAL_TRANSDUCTION | 24 | -0.654742044 | -2.00953621 | 0.000288966 | 0.005036706 | 0.003879861 | 1322 | tags=42%, list=8%, signal=38% | KCNC2/GUCY1A2/VEGFA/ATP2B4/NOS1/NOS3/NOS1AP/FPR1/THBS1/RASD1 |
| GOBP_KIDNEY_EPITHELIUM_DEVELOPMENT | GOBP_KIDNEY_EPITHELIUM_DEVELOPMENT | 131 | -0.388609069 | -1.678662865 | 0.000291025 | 0.005058999 | 0.003897034 | 3211 | tags=34%, list=21%, signal=27% | FOXJ1/POU3F3/LHX1/TCF21/FGF8/PTCH1/YAP1/CD34/WWTR1/ADIPOQ/SOX8/NOG/WNK4/HOXA11/MAGI2/WNT7B/HES1/GLI3/SPRY1/ASXL1/GZF1/CITED1/SIX4/TFAP2B/BMP2/JAG1/VEGFA/GATA3/HES5/PODXL/IRX2/SMAD3/ADAMTS16/WT1/NPHS1/ARG2/FOXC2/OSR1/IRX3/TACSTD2/SDC4/LIF/FOXC1/MYC |
| GOBP_INACTIVATION_OF_MAPK_ACTIVITY | GOBP_INACTIVATION_OF_MAPK_ACTIVITY | 25 | -0.635410164 | -1.963395623 | 0.000294439 | 0.005104654 | 0.003932203 | 2905 | tags=52%, list=19%, signal=42% | DUSP7/SPRED1/CAV1/RGS4/DUSP1/DUSP16/DUSP9/DUSP21/SPRED2/DUSP10/DUSP5/DUSP8/DUSP6 |
| GOBP_NEGATIVE_REGULATION_OF_LOCOMOTION | GOBP_NEGATIVE_REGULATION_OF_LOCOMOTION | 276 | -0.328646907 | -1.578899816 | 0.000299793 | 0.005183618 | 0.00399303 | 2612 | tags=26%, list=17%, signal=22% | ADIPOQ/WAS/GHRL/ANGPT2/SEMA6A/SEMA3C/NKX2-1/JUP/SPRED1/SEMA6C/NOG/PTPRT/ADA/SEMG2/ABHD2/MAGI2/TBX5/HMOX1/STARD13/MMP28/SEMA3D/RAC1/DPYSL3/VCL/WNT3A/TBXA2R/IL24/CCL25/SEMA4F/SLC9A3R1/NFE2L2/DNAJA4/SEMA3B/CX3CL1/DUSP1/KRT16/PLCB1/FOXO3/TNN/RIN3/HYAL2/SEMA3A/SULF1/ATP1B2/JAG1/TGFB1/DUSP10/GATA3/CCL21/SRGAP1/GHSR/FBLN1/SEMA4A/TRIB1/ATP2B4/CXCL13/GJA1/PLXNA3/ANGPT4/WNT3/CHRD/RHOB/SEMA4B/SRF/HAS1/STC1/PPARGC1A/APOD/TACSTD2/THBS1/KLF4/CCL2/SERPINE1 |
| GOBP_ANGIOGENESIS_INVOLVED_IN_WOUND_HEALING | GOBP_ANGIOGENESIS_INVOLVED_IN_WOUND_HEALING | 24 | -0.65436204 | -2.0083699 | 0.000301621 | 0.005201359 | 0.004006696 | 3490 | tags=58%, list=22%, signal=45% | KDR/SMOC2/ALOX5/CD34/SLC12A2/CXCR4/VEGFA/TNFAIP3/GPR4/FOXC2/SRF/B4GALT1/MCAM/SERPINE1 |
| GOBP_COGNITION | GOBP_COGNITION | 252 | -0.324424843 | -1.539507919 | 0.000321249 | 0.005525137 | 0.004256109 | 3971 | tags=36%, list=26%, signal=27% | LMX1A/S100B/DLG4/NPAS4/MAP1A/TLR2/GRPR/DRD2/YTHDF1/NRXN3/GRIN1/CCK/GIP/ITGA3/KCNK10/MGAT3/MEIS2/LRRN4/NRXN1/LCE1D/CRH/SCN2A/EGR2/AGER/CHRNA7/EGFR/NTF3/OXTR/CHRNB2/NTSR1/ZNF385A/NTRK1/INSR/DRD3/KCNK4/SHANK1/TANC1/PTPRZ1/CEBPB/CHRNA4/MAPT/KAT2A/ARC/VIP/SLC11A2/TH/RGS14/SHANK3/KLK8/NPTN/GABRA5/CCL11/DKK1/SLC6A4/NFATC4/KALRN/DBH/DRD5/TTBK1/ADCY3/NLGN3/SLC8A3/PLCB1/CPEB3/CHRM1/CUX2/TPBG/LILRB2/NTRK2/BRSK1/NTF4/ATP1A2/SGK1/GPR88/SLC1A4/GHSR/LHX8/BTG2/SLC24A2/NPTX2/TAC1/C5AR1/PTCHD1/SRF/LDLR/JUN/TNR/SLC8A2/FAM107A/FOSL1/FOS |
| GOBP_CD4_POSITIVE_ALPHA_BETA_T_CELL_ACTIVATION | GOBP_CD4_POSITIVE_ALPHA_BETA_T_CELL_ACTIVATION | 93 | -0.427450121 | -1.730148557 | 0.000322586 | 0.005533459 | 0.004262518 | 1986 | tags=24%, list=13%, signal=21% | IL23R/TOX/STAT3/IL18R1/IRF4/RELB/PLA2G2D/PRKCQ/TGFBR2/FOXP1/GATA3/SEMA4A/JAK3/CD274/ARG2/NFKBIZ/BCL6/IL4R/BCL3/SOCS1/ZC3H12A/IL6 |
| GOBP_REGULATION_OF_CELL_MORPHOGENESIS | GOBP_REGULATION_OF_CELL_MORPHOGENESIS | 278 | -0.321504755 | -1.546435074 | 0.000324535 | 0.005548617 | 0.004274195 | 3143 | tags=24%, list=20%, signal=20% | WTIP/SYT4/FGR/FGA/GRIP1/BAMBI/MYH10/MYOC/RHOU/OSTN/COCH/BVES/CDC42SE1/EPB41L3/ABL1/SPRY3/FGD1/CAMSAP1/P2RY1/ERMN/ARC/PLXNA2/DBN1/CCL11/FMNL3/WDR1/EEF2K/KALRN/RAC1/SLC9A3R1/CXCR4/FGD2/PTPRD/RHOD/CDC42EP2/C15orf62/RND3/FGD5/PDPN/CPNE6/CUX2/PDZD8/EFNA5/VEGFA/FAM171A1/FBLN1/SEMA4A/PARVB/NEDD9/RND2/PLXNA3/CDC42EP3/MYADM/CACNG7/CCL3/CCL7/ICAM1/RHOB/CASS4/CDC42EP1/SLC23A2/HAS2/LPAR1/TACSTD2/SPRY4/RND1/CCL2/VIL1 |
| GOBP_PROTEIN_MODIFICATION_BY_SMALL_PROTEIN_REMOVAL | GOBP_PROTEIN_MODIFICATION_BY_SMALL_PROTEIN_REMOVAL | 248 | 0.329350386 | 1.566582491 | 0.000325181 | 0.005548617 | 0.004274195 | 4585 | tags=45%, list=29%, signal=32% | USP9Y/USP18/ACTR8/PSMD10/DDX58/BRCA1/IFIH1/COPS4/SUDS3/TGFBR1/MBD5/RNF128/USP40/SKP2/PSMB9/PSMA2/BRCC3/SENP8/CFTR/COPS6/POLB/PSMB7/SMAD7/PSME2/PSMD14/KEAP1/USP47/TFPT/PSMA4/CCNA2/USP28/APC/PSMD4/ATXN3/USP30/PSMD7/WDR48/STAM2/PSMD1/COPS5/TRAF3/PSMA3/MAP3K7/COPS2/PSMD13/EIF3F/ACTR5/USP48/DDB2/USP33/JOSD2/USP45/PSMD11/ESR1/SART3/USP21/PSMA1/RHOT1/CDC20/PSMB10/SMURF2/PSMC6/PSMB5/USP51/PTEN/PARK7/CLSPN/UCHL3/PSMC4/USP46/OTUD7B/RUVBL1/SENP2/USP15/KAT2B/KDM1B/ACTL6A/PSMC3/TANK/STAMBP/SMAD2/PSME1/FOXO4/VCP/PSMB1/PSMD2/CYLD/USP3/IL33/BECN1/SENP3/WDR20/PSMA5/INO80C/TRIM21/SNX3/RPS27A/OTUB2/GPS1/PSMC5/USPL1/USP1/SENP7/OTUD6B/USP7/SENP6/SUPT3H/PSMB8/OTUD6A/USP5/TAF9B/PSMB4 |
| GOBP_DNA_GEOMETRIC_CHANGE | GOBP_DNA_GEOMETRIC_CHANGE | 105 | 0.412730726 | 1.756382867 | 0.000326441 | 0.005553182 | 0.004277712 | 5152 | tags=56%, list=33%, signal=38% | TOP2A/MCM5/XPA/CETN2/ZRANB3/MCM6/MCM2/GTF2H5/RUVBL2/RFC3/SMARCAD1/HMGB3/SMARCAL1/GTF2H3/ASCC3/ERCC8/ERCC6/DDB2/CHTF8/RBX1/RFC5/MNAT1/ATRX/RECQL/RFC4/HMGB2/CHTF18/RUVBL1/POT1/XRCC5/DSCC1/SETX/DDX11/MCM8/SSBP1/CHD1L/RPS27A/MCM4/ERCC3/FANCM/CHD4/HELQ/RPA1/RAD50/GTF2F2/RAD54B/RECQL4/DHX9/DDX1/RAD54L/GTF2H4/MCM9/MCM3/CHD9/PURA/BRIP1/XPC/NBN/UBB |
| GOBP_RESPONSE_TO_CATECHOLAMINE | GOBP_RESPONSE_TO_CATECHOLAMINE | 98 | -0.437024673 | -1.78645501 | 0.000327162 | 0.005553182 | 0.004277712 | 3871 | tags=45%, list=25%, signal=34% | DRD4/DRD2/HTR3D/GNAS/HTR2C/STAR/OR10H1/HTR3E/OR10H4/ATF4/HRH2/DRD3/HTR3A/ADIPOQ/ABL1/SIN3A/HTR1F/HTR4/ID1/RYR2/SRD5A1/KLF16/RGS4/OR5T2/OR5T3/SLC9A1/DRD5/HTR3B/SLC9A3R1/ADCY5/PDE4B/CHRM1/OR10H2/APLP1/CHRM5/GNA11/OR10H5/PENK/ATP2B4/CALY/GNA15/NR4A3/HTR3C/PPARGC1A |
| GOBP_VASOCONSTRICTION | GOBP_VASOCONSTRICTION | 75 | -0.458373898 | -1.788985486 | 0.000332836 | 0.005629025 | 0.004336135 | 3343 | tags=44%, list=21%, signal=35% | AKT1/ACE/FGG/SMTNL2/FGA/EGFR/OXTR/HRH2/KCNMB4/CAV1/ADRA1D/AGTR1/KEL/SLC6A4/DBH/DRD5/TBXA2R/TRPM4/AVPR1A/ECE1/ACTA2/LEP/ATP1A2/CRP/KCNA5/GJA1/PER2/ADM/ICAM1/P2RX1/EDN3/EDN1/SCNN1B |
| GOCC_CYTOSOLIC_RIBOSOME | GOCC_CYTOSOLIC_RIBOSOME | 100 | 0.419322496 | 1.770200609 | 0.000333366 | 0.005629025 | 0.004336135 | 4558 | tags=48%, list=29%, signal=34% | RPS4Y1/ISG15/HBA2/RPS21/RPL39L/MCTS1/RPL7A/RPS26/MRPL1/RPSA/RPS7/RPL26/RPL23A/RPL37/RPL7/RPL35A/RPL13A/RPS23/RPS29/RPL8/RPL15/RPLP0/RPL34/RPL17/RPS3A/RPL41/MRPS11/RPS2/RPL29/RPL9/RPL11/RPL36AL/RPS15A/RPL3/DHX29/RPL21/RPL3L/RPS27A/RPS27L/RPS3/RPL31/RPS9/RPL27A/LARP4/RPS24/RPS12/RPS8/RPL23 |
| GOBP_SYNAPTIC_MEMBRANE_ADHESION | GOBP_SYNAPTIC_MEMBRANE_ADHESION | 25 | -0.63286896 | -1.95554339 | 0.000337422 | 0.005682708 | 0.004377488 | 2343 | tags=36%, list=15%, signal=31% | PCDH8/SLITRK1/PTPRD/IL1RAP/NLGN1/FLRT3/SLITRK2/LRFN5/SLITRK3 |
| GOBP_CARDIAC_MUSCLE_CELL_CONTRACTION | GOBP_CARDIAC_MUSCLE_CELL_CONTRACTION | 67 | -0.479627943 | -1.840649962 | 0.000342864 | 0.005759402 | 0.004436567 | 2660 | tags=36%, list=17%, signal=30% | CACNA2D1/JUP/SCN5A/RYR2/CAV1/SCN2B/CACNA1G/SLC9A1/SCN3B/TRPM4/GJC1/PDE4B/SCN1A/ATP1A2/PDE4D/KCNA5/ANK2/ATP2A1/GJA1/KCNE4/GATA4/NOS1AP/HCN4/STC1 |
| GOBP_REGULATION_OF_POSITIVE_CHEMOTAXIS | GOBP_REGULATION_OF_POSITIVE_CHEMOTAXIS | 24 | -0.649072413 | -1.992134959 | 0.000343805 | 0.005760292 | 0.004437252 | 3524 | tags=67%, list=23%, signal=52% | ITGA2/KDR/AGER/NTF3/ANGPT2/ARTN/S1PR1/FGF10/PGF/AZU1/F3/NTRK3/VEGFA/CDH13/SMAD3/VEGFC |
| GOBP_TELOMERE_MAINTENANCE_VIA_SEMI_CONSERVATIVE_REPLICATION | GOBP_TELOMERE_MAINTENANCE_VIA_SEMI_CONSERVATIVE_REPLICATION | 27 | 0.611683655 | 1.954741522 | 0.000345676 | 0.005776704 | 0.004449895 | 3051 | tags=48%, list=20%, signal=39% | PCNA/RFC1/FEN1/POLE2/POLD1/PRIM2/RFC3/PRIM1/RFC5/RPA3/POLD2/POLA2/RFC4 |
| GOMF_VOLTAGE_GATED_CATION_CHANNEL_ACTIVITY | GOMF_VOLTAGE_GATED_CATION_CHANNEL_ACTIVITY | 133 | -0.392320212 | -1.690865692 | 0.000355332 | 0.005922803 | 0.004562437 | 4579 | tags=47%, list=29%, signal=33% | CACNA1C/KCNAB3/KCND3/CACNG8/KCNH4/CACNA1F/GRIN3A/KCND2/KCNQ2/KCNQ4/KCNA4/GRIN2C/KCNA2/CACNA1B/GRIN1/LRRC52/KCNG1/KCNJ13/CACNB1/LRRC55/KCNG3/KCNJ9/CACNA1A/HCN2/CACNA1E/KCNC1/GRIN2D/ABCC8/CACNA2D1/KCNJ12/CACNA1I/KCNJ1/CACNG5/CACNG1/KCNJ14/KCNK18/CACNA1G/KCNC2/KCNH6/KCNA10/KCNT1/CACNG6/KCNG2/KCNS1/KCNS2/KCNJ6/KCNB2/TPCN1/KCNA1/KCNS3/KCNH3/TPCN2/KCNH5/KCNG4/KCNA5/KCNC3/CACNG3/KCNE4/CACNG7/HCN4/CACNG2/KCNK1 |
| GOBP_MICROTUBULE_CYTOSKELETON_ORGANIZATION_INVOLVED_IN_MITOSIS | GOBP_MICROTUBULE_CYTOSKELETON_ORGANIZATION_INVOLVED_IN_MITOSIS | 122 | 0.399115674 | 1.725257495 | 0.000357498 | 0.005940335 | 0.004575942 | 4069 | tags=43%, list=26%, signal=32% | NUSAP1/NDC80/CDK5RAP2/GNAI1/UBXN2B/TUBG2/MAD2L1/SPAST/AURKA/TUBG1/RACGAP1/RCC1/DYNLT1/GOLGA2/CHMP5/AURKB/KIFC1/STAG1/CHMP2A/NEK2/TACC3/ESPL1/CLASP2/PRC1/NUF2/CENPH/KIF3B/KIF11/TNKS/CEP192/CLTC/DYNC1H1/CHEK2/CDC20/DLGAP5/STMN1/VPS4B/STAG2/WDR62/CHMP1A/PAFAH1B1/VCP/CENPE/DRG1/MCPH1/ZW10/DCTN6/CEP97/BCCIP/NSFL1C/CHMP2B/KIF2A |
| GOBP_HUMORAL_IMMUNE_RESPONSE | GOBP_HUMORAL_IMMUNE_RESPONSE | 234 | -0.338407792 | -1.591747991 | 0.000359191 | 0.005940335 | 0.004575942 | 3211 | tags=29%, list=21%, signal=23% | FOXJ1/CXCL3/PI3/SERPING1/IFNA2/FGA/REG1B/IFNG/ALOX5/PDCD1/GALP/C9/IL17F/WFDC2/IFNA21/DEFB103A/TNFRSF21/A2M/WFDC12/SEMG2/WFDC3/WFDC10B/DEFB127/PGC/CFD/AIRE/IFNA14/PGLYRP3/WFDC9/IFNA8/KLK3/CXCL5/REG3G/PAX5/POU2AF1/KLK7/TREM1/CPN1/CCR7/AZU1/LCN2/NOD2/KRT6A/PRTN3/CXCL6/GATA3/SPINK5/S100A9/GATA6/BLNK/CRP/S100A8/EBI3/TRAF3IP2/CXCL13/PLA2G2A/C5AR1/SLC11A1/DEFB126/CD19/DEFB118/CXCL2/IL1B/CXCL1/S100A12/BCL3/CCL2/IL6 |
| GOBP_ENDOTHELIAL_CELL_PROLIFERATION | GOBP_ENDOTHELIAL_CELL_PROLIFERATION | 132 | -0.395739481 | -1.709154938 | 0.000360136 | 0.005940335 | 0.004575942 | 2949 | tags=29%, list=19%, signal=24% | FGFBP1/ALOX5/PRL/CD34/SIRT1/GHRL/IL12A/VIP/CAV1/HMOX1/AGTR1/CCL11/NRARP/BMP6/PGF/PDGFB/PROX1/F3/SULF1/BMP2/LEP/VEGFA/COL4A3/GHSR/CDH13/CCL26/GJA1/VEGFC/FGFR1/EGR3/IL10/LRG1/ERN1/THBS1/PROK2/CCL2/NR4A1/EPHA2 |
| GOMF_PROTEIN_TYROSINE_THREONINE_PHOSPHATASE_ACTIVITY | GOMF_PROTEIN_TYROSINE_THREONINE_PHOSPHATASE_ACTIVITY | 10 | -0.800181548 | -1.871881562 | 0.000360645 | 0.005940335 | 0.004575942 | 1412 | tags=70%, list=9%, signal=64% | DUSP1/DUSP16/DUSP9/DUSP10/DUSP5/DUSP8/DUSP6 |
| GOBP_NEGATIVE_REGULATION_OF_CD4_POSITIVE_ALPHA_BETA_T_CELL_ACTIVATION | GOBP_NEGATIVE_REGULATION_OF_CD4_POSITIVE_ALPHA_BETA_T_CELL_ACTIVATION | 28 | -0.603627101 | -1.920981802 | 0.000360964 | 0.005940335 | 0.004575942 | 686 | tags=21%, list=4%, signal=21% | JAK3/CD274/ARG2/BCL6/IL4R/ZC3H12A |
| GOBP_NEURON_PROJECTION_GUIDANCE | GOBP_NEURON_PROJECTION_GUIDANCE | 267 | -0.323281251 | -1.542096217 | 0.000365548 | 0.005987821 | 0.004612522 | 3653 | tags=33%, list=23%, signal=26% | EPHB4/SEMA3E/BOC/LAMA5/DSCAML1/LHX3/EPHA10/PDLIM7/GAP43/GBX2/NRXN1/SLIT1/EFNA1/CNTN2/GAB2/EGR2/LHX1/L1CAM/EPHA8/SHC3/FGF8/PTCH1/NTRK1/ISL1/PALLD/SEMA6A/SEMA3C/NKX2-1/SEMA6C/VAX1/NOG/SPTBN1/NCAM1/ARTN/RPS6KA5/ARX/PLXNA2/SHANK3/NPTN/GLI3/MYPN/RNF165/SEMA3D/LHX9/SPTBN4/KALRN/RAC1/TRIO/WNT3A/SLIT3/SEMA4F/ATOH1/SEMA3B/EFNB2/CXCR4/PRKCQ/GBX1/NTN5/LAMA1/OR10A4/EPHB1/TUBB2B/SEMA3A/TUBB3/POU4F2/EFNA5/VEGFA/GATA3/KIF5A/UNC5D/DCC/SEMA4A/CHL1/FLRT3/NOTCH3/LAMC2/PLXNA3/GFRA3/RAP1GAP/PLA2G10/ZSWIM4/WNT3/SEMA4B/CDH4/IRS2/POU4F3/TNR/EPHA2 |
| GOBP_REGULATION_OF_MACROAUTOPHAGY | GOBP_REGULATION_OF_MACROAUTOPHAGY | 145 | 0.38235488 | 1.707051768 | 0.000365697 | 0.005987821 | 0.004612522 | 3979 | tags=41%, list=26%, signal=31% | PRKAA2/CHMP4A/NUPR1/PRKAB2/SCFD1/CDK5/ATP6V0D1/MTM1/SESN3/VPS13C/LRRK2/PIP4K2B/RRAGB/EXOC4/FYCO1/OPTN/PRKAG1/ATP6V0E2/CASP3/HDAC6/USP30/ATP6V1H/ATP6V1E2/SPTLC2/SNX5/FEZ2/MAPK8/MLST8/MAP3K7/UVRAG/SMG1/RHEB/ATP6V1D/SCOC/ATP6V1B2/MAPK3/ATP6V1A/PIP4K2C/SPTLC1/VPS35/PRKACA/SH3GLB1/RAB3GAP2/LRSAM1/POLDIP2/ATP6V0D2/CAPN1/SESN1/NEDD4/DCN/VPS26A/SNX6/SLC38A9/FEZ1/BECN1/ATP6V1C1/EXOC8/EXOC1/ATP13A2/RRAGC |
| GOBP_RESPONSE_TO_STEROL | GOBP_RESPONSE_TO_STEROL | 30 | 0.619631901 | 1.993425769 | 0.000367969 | 0.006009851 | 0.004629492 | 1318 | tags=33%, list=8%, signal=31% | CYP7A1/HMGCS1/GRAMD1C/TGFBR1/GPLD1/SMO/PMVK/RORC/INHBA/AACS |
| GOMF_SODIUM_CHANNEL_ACTIVITY | GOMF_SODIUM_CHANNEL_ACTIVITY | 38 | -0.564394246 | -1.927795617 | 0.00036961 | 0.006021485 | 0.004638453 | 3514 | tags=55%, list=23%, signal=43% | SLC4A11/SCN10A/SCNN1G/SCN2A/HCN2/CACNA1I/GRIK4/SCN5A/SCN2B/CACNA1G/GRIK3/SCN3B/GRIK5/SCN1A/TPCN1/SCNN1A/SCN9A/SCN7A/HCN4/SCNN1B/KCNK1 |
| GOBP_EXIT_FROM_MITOSIS | GOBP_EXIT_FROM_MITOSIS | 25 | 0.640779977 | 2.005072011 | 0.000375862 | 0.006107996 | 0.004705094 | 2002 | tags=36%, list=13%, signal=31% | NPM2/SPAST/ANLN/CDC23/PPP1R9B/CHMP2A/CLASP2/PHB2/KNTC1 |
| GOBP_REGULATION_OF_LIPID_METABOLIC_PROCESS | GOBP_REGULATION_OF_LIPID_METABOLIC_PROCESS | 352 | 0.297677778 | 1.46991492 | 0.000379829 | 0.006157026 | 0.004742863 | 2016 | tags=19%, list=13%, signal=17% | CYP7A1/EEF1A2/GPAM/ME1/SQLE/PRKAA2/FABP5/THRSP/SIRT4/PDP2/FADS1/HMGCS1/FGF21/SPHK2/BMP5/MTMR4/MVK/PRKAB2/BRCA1/HTR2B/FDFT1/ELOVL6/STARD4/LSS/IDI1/ENHO/GPLD1/IDH1/BBS4/PMVK/TM7SF2/TM6SF2/MVD/CCL19/SEC14L2/PRKCE/PIP4K2B/NFYB/SULT2A1/ACADL/CD36/SLC45A3/HSD17B13/ORMDL1/RGN/RORC/ABCB4/ANGPTL3/VAV2/CREBL2/CLCN2/NPAS2/STUB1/IRS1/ARV1/APOA5/CYP51A1/EDF1/LACTB/PDGFA/VAV3/ACADM/MID1IP1/ABCD2/PHB2/HMGCR/PIK3IP1 |
| GOBP_IN_UTERO_EMBRYONIC_DEVELOPMENT | GOBP_IN_UTERO_EMBRYONIC_DEVELOPMENT | 311 | -0.316176647 | -1.540422079 | 0.00039306 | 0.006348854 | 0.004890631 | 2925 | tags=26%, list=19%, signal=22% | UBE2B/APBA3/NDEL1/PTCH1/ACVR1B/YAP1/ZNF335/NCOA1/SLC5A7/FURIN/SIN3A/CEBPB/CDX4/ACVR1/SOX8/HEY1/KAT2A/NOG/FZD5/ADA/HM13/TMEM231/CNOT3/DBN1/ZFAND5/GINS4/ZMIZ1/WNT7B/HES1/IFITM5/GLI3/PHLDA2/RBM46/WDR74/WNT3A/SLC30A1/CITED1/APBA1/GJB3/PDGFB/TGFBR2/GCM1/GRHL2/SH3PXD2A/LMX1B/BMP2/BCOR/KLF2/AGBL4/VEGFA/GATA3/IGF1/HS3ST6/BYSL/PRDM14/HAND1/NECAB1/GATA6/BCL2L11/SMAD3/SALL4/ADM/MYBPHL/ELL/EPAS1/SRF/MYO18B/MSX1/IL10/CCDC62/SOX17/MAFF/EDN1/ELF3/LIF/KLF4/TGFB3/FOXC1/SOCS3/FOSL1/JUNB |
| GOBP_POSITIVE_REGULATION_OF_GLIOGENESIS | GOBP_POSITIVE_REGULATION_OF_GLIOGENESIS | 56 | -0.497975761 | -1.863098023 | 0.00039365 | 0.006348854 | 0.004890631 | 2692 | tags=32%, list=17%, signal=27% | ASPA/PTPRZ1/RELA/SOX8/HES1/ZNF365/TTBK1/TNFRSF1B/CXCR4/NKX2-2/LRP2/BMP2/TGFB1/MAG/IL1B/LIF/CLCF1/IL6 |
| GOBP_CELL_CYCLE_CHECKPOINT | GOBP_CELL_CYCLE_CHECKPOINT | 179 | 0.358615307 | 1.636185319 | 0.0003946 | 0.006348854 | 0.004890631 | 4033 | tags=39%, list=26%, signal=29% | MSH2/NDC80/CDK5RAP2/BRCA1/DTL/MAD2L1/PCNA/CHEK1/ZWINT/AURKA/BUB1/BRCC3/CNOT8/GEN1/CLOCK/FZR1/IK/ZWILCH/AURKB/DONSON/CDT1/FBXO6/USP28/ZFYVE19/GADD45A/APC/NAE1/ETAA1/RPL26/THOC5/TP53BP1/RAD17/TRIAP1/KLHL22/TRIP13/ERCC6/MAD2L2/KNTC1/XRCC3/PTPN11/CEP63/DYNC1LI1/CDKN1B/WDR76/SYF2/CHEK2/CDC20/CDC5L/ATF2/BUB3/DCLRE1B/CLSPN/CDC6/PSMG2/ZNF830/RAD9A/FBXO4/LCMT1/FOXO4/ATM/EME1/PCBP4/CNOT7/ZW10/RINT1/MAPK14/RPS27L/FEM1B/RAD9B |
| GOBP_REGULATION_OF_CELL_SHAPE | GOBP_REGULATION_OF_CELL_SHAPE | 137 | -0.391486292 | -1.690442493 | 0.00040394 | 0.006483034 | 0.004993992 | 2709 | tags=27%, list=17%, signal=23% | RHOU/COCH/BVES/CDC42SE1/EPB41L3/FGD1/P2RY1/ERMN/PLXNA2/CCL11/FMNL3/WDR1/RAC1/SLC9A3R1/FGD2/RHOD/CDC42EP2/C15orf62/RND3/FGD5/PDPN/VEGFA/FAM171A1/SEMA4A/PARVB/RND2/PLXNA3/CDC42EP3/CCL3/CCL7/ICAM1/RHOB/CDC42EP1/LPAR1/RND1/CCL2/VIL1 |
| GOCC_NADH_DEHYDROGENASE_COMPLEX | GOCC_NADH_DEHYDROGENASE_COMPLEX | 41 | 0.558904592 | 1.92848892 | 0.0004107 | 0.006561064 | 0.005054101 | 5623 | tags=76%, list=36%, signal=48% | NDUFAF1/NDUFA5/NDUFS4/NDUFA6/NDUFB2/NDUFB1/NDUFB4/NDUFA10/NDUFA9/NDUFB6/NDUFV1/FOXRED1/NDUFA11/NDUFB10/NDUFC1/NDUFAB1/NDUFB3/NDUFA12/NDUFB5/NDUFS2/NDUFA1/NDUFS5/NDUFS8/NDUFS7/NDUFB11/NDUFA8/NDUFA2/NDUFV2/NDUFA7/NDUFC2/NDUFB7 |
| GOBP_REPRODUCTIVE_SYSTEM_DEVELOPMENT | GOBP_REPRODUCTIVE_SYSTEM_DEVELOPMENT | 387 | -0.298277628 | -1.478408578 | 0.000410825 | 0.006561064 | 0.005054101 | 2642 | tags=26%, list=17%, signal=22% | FGF8/PTCH1/DMC1/NTRK1/PTPRN/EREG/NCOA1/SIRT1/HSD17B3/CEBPB/GHRL/CDX4/NKX2-1/SOX8/HEY1/NOG/FZD5/HOXA11/HOXA9/PCYT1B/ADA/VDR/UTF1/SPO11/SRD5A1/RETN/REC8/TGFB2/WNT7B/HES1/MSH4/GLI3/MC2R/PHLDA2/FGF10/RBM15/LHX9/EPOR/BMP6/ADAM19/SLIT3/CYP19A1/GPR149/CITED1/SERPINB5/LRP2/NKX3-1/GJB3/PDGFB/TFAP2C/BMP15/SPATA2/SIX4/GCM1/GRHL2/SEMA3A/SULF1/NDP/MAS1/LEP/VEGFA/GATA3/CRIP1/ASB1/HAND1/GHSR/GATA6/LHX8/BIK/BCL2L11/TIPARP/STC2/CYP27B1/GJA1/HOXA13/FGF9/WT1/ADM/GATA4/MMP19/TYRO3/ICAM1/EPAS1/ADCYAP1/HOXD13/OSR1/ITGB8/IL10/FST/STC1/ARID5B/INHBB/LIF/PTX3/FOXC1/SOCS3/ADAMTS1/FOSL1/JUNB |
| GOBP_RESPONSE_TO_BMP | GOBP_RESPONSE_TO_BMP | 153 | -0.377016763 | -1.665602271 | 0.000416898 | 0.006625415 | 0.005103672 | 1447 | tags=20%, list=9%, signal=18% | LRP2/BMP15/TFAP2B/HIPK2/SULF1/BMP2/TGFB1/VWC2/RGMA/GATA3/HES5/TGFBR3/GATA6/GDF3/CHRDL1/SMAD3/PHOX2B/HOXA13/GATA4/GREM2/SOX11/CHRD/MSX1/GDF5/ACVR2B/FST/DAND5/TGFB3/HIVEP1/EGR1 |
| GOCC_SCHAFFER_COLLATERAL_CA1_SYNAPSE | GOCC_SCHAFFER_COLLATERAL_CA1_SYNAPSE | 66 | -0.468777548 | -1.792108165 | 0.000416898 | 0.006625415 | 0.005103672 | 3441 | tags=39%, list=22%, signal=31% | LRFN2/GABBR1/PTPRS/SYN2/BSN/SYP/GHRL/NPTN/SLC30A1/APBA1/LRRTM2/PTPRD/TUBB2B/CHRM1/GSG1L/ADRB1/INA/GHSR/DCC/SYN1/CACNG3/ITPR1/CPLX1/AKAP12/CACNG2/TNR |
| GOBP_REGULATION_OF_SMALL_MOLECULE_METABOLIC_PROCESS | GOBP_REGULATION_OF_SMALL_MOLECULE_METABOLIC_PROCESS | 381 | 0.295029168 | 1.465827664 | 0.000423173 | 0.006708696 | 0.005167824 | 2921 | tags=25%, list=19%, signal=21% | CYP7A1/GPAM/SQLE/PPP1R3C/GCK/PRKAA2/FABP5/SIRT4/PDP2/HMGCS1/SPHK2/TREM2/BMP5/NUPR1/MVK/GPD1/PSMD10/PRKAB2/GUCA2B/BRCA1/PPP1R3B/FDFT1/ELOVL6/OAZ2/STARD4/LSS/IDI1/GPLD1/DDIT4/PMVK/TM7SF2/MVD/PSMB9/PSMA2/SEC14L2/PRKCE/PSMB7/PSME2/NFYB/ACADL/PSMD14/SLC45A3/SEC13/RGN/RORC/PSMA4/PRKAG1/NUP93/CLCN2/KHK/PSMD4/NUP43/PPP1CA/GCKR/COX11/PSMD7/TMSB4X/PSMD1/IRS1/ARV1/APOA5/CYP51A1/PGAM1/PPP1CB/PSMA3/NUP37/MID1IP1/ABCD2/PSMD13/HMGCR/PSEN1/MAEA/COQ3/CDA/PSMD11/PANK2/TYSND1/SLC7A7/NUP85/ELOVL5/CLYBL/NR1H4/CD244/FASN/SCD/PSMA1/PSMB10/PSMC6/PSMB5/DHCR7/NFYA/SNAI2/SREBF2/PARK7/NUP54 |
| GOBP_FC_RECEPTOR_SIGNALING_PATHWAY | GOBP_FC_RECEPTOR_SIGNALING_PATHWAY | 168 | 0.364044281 | 1.650728291 | 0.000432401 | 0.006838261 | 0.00526763 | 3084 | tags=35%, list=20%, signal=28% | CD3G/PSMD10/PIGR/MAPK9/PSMB9/CD200R1/PSMA2/PRKCE/PIK3R1/PSMB7/PSME2/PSMD14/CYFIP2/PLCG1/FCGR3A/PSMA4/SOS1/VAV2/BTK/PSMD4/PTPRC/IKBKB/PSMD7/WIPF3/PSMD1/MAPK8/VAV3/PIK3R2/PSMA3/MAP3K7/PSMD13/SKP1/NCKAP1L/SYK/BTRC/PPP3CA/CD247/ACTR2/BAIAP2/ELMO2/PSMD11/PAK1/GRAP2/MS4A2/MAPK3/NCK1/ABI1/PSMA1/PSMB10/HSP90AB1/PSMC6/APPL1/PSMB5/ARPC2/NCKAP1/ARPC3/PSMC4/FCGR2B |
| GOBP_ODONTOGENESIS | GOBP_ODONTOGENESIS | 118 | -0.412683914 | -1.741941618 | 0.000435222 | 0.00685149 | 0.005277821 | 2897 | tags=31%, list=19%, signal=25% | TNFSF11/FGF8/CD34/FGF4/SCN5A/TFAP2A/FAM20A/AQP3/PHEX/TGFB2/GLI3/FGF10/AMTN/CSF1/TUFT1/AMELX/ODAM/BMP2/BCOR/HAND1/LHX8/BCL2L11/SLC24A4/ALPL/KLK4/CSF3R/ADM/OSR1/MSX1/FST/LRP4/FOXO1/EDN1/TGFB3/FOXC1/SERPINE1 |
| GOBP_BASE_EXCISION_REPAIR | GOBP_BASE_EXCISION_REPAIR | 38 | 0.550420327 | 1.870607616 | 0.000435351 | 0.00685149 | 0.005277821 | 3368 | tags=45%, list=22%, signal=35% | XPA/PCNA/NEIL2/FEN1/POLD1/POLB/PARP2/OGG1/USP47/ERCC6/RPA3/FAM168A/APEX1/NEIL1/NTHL1/MBD4/XRCC1 |
| GOBP_SULFUR_COMPOUND_METABOLIC_PROCESS | GOBP_SULFUR_COMPOUND_METABOLIC_PROCESS | 340 | 0.298405669 | 1.466026937 | 0.000442208 | 0.006942557 | 0.005347971 | 3809 | tags=36%, list=24%, signal=28% | GPAM/CHST9/ACOT12/GSTT1/PDP2/HMGCS1/CSAD/MVK/AKR1A1/GSTA4/DBI/ELOVL6/ARL6IP5/SULT1E1/SLC35B3/MGST1/ACSS2/IDH1/PMVK/ACOT1/GSTO2/BTD/MVD/ELOVL2/LIAS/ISCA2/DLD/UGDH/ACOT9/SULT2A1/DGAT1/SUCLG2/B3GNT2/MAT2B/ACOT8/LUM/HEXA/BHMT2/B4GALT4/ACSM2B/NUDT7/ELOVL1/ACSM1/PAPSS1/ACSM5/GLB1/SUCLA2/GSTA2/GSS/TSTD1/FAR2/PDZD11/SULT1B1/GLRX3/BPNT1/HAGH/GLYAT/PCCB/PDHA1/ACSM3/ESD/MCCC1/GHR/HSD17B8/MMACHC/PTGES2/GSTO1/THTPA/GAL3ST4/PAPSS2/TXN2/ELOVL5/B4GALT6/ACSF2/NFS1/FASN/GLO1/SCD/TPK1/SLC25A1/PPCS/HSCB/DIP2A/PPT1/ACBD6/GCLC/PIPOX/ANGPT1/CTNS/NAT8/APIP/SLC26A1/PARK7/HMGCL/PDHB/MCEE/CBR4/B4GALT2/HEXB/SULT1C2/SLC25A10/DGAT2/HPGDS/ETHE1/AHCYL2/ACAT1/GGCT/CLIC3/CHST13/MSRA/BHMT/SUOX/DCN/TST/NUBP2/ACOT11/MPST/NFU1/ACACA/DPEP1/ISCU/ENPP1 |
| GOBP_CIRCADIAN_SLEEP_WAKE_CYCLE | GOBP_CIRCADIAN_SLEEP_WAKE_CYCLE | 25 | -0.628426643 | -1.941816782 | 0.000444922 | 0.006944825 | 0.005349718 | 4454 | tags=76%, list=29%, signal=54% | NMU/GHRHR/NPY2R/DRD2/STAR/CRH/CHRNB2/MTNR1B/DRD3/GHRL/AHCY/ADA/TH/SRD5A1/PER3/GHRH/ADRB1/NLGN1/NR1D1 |
| GOBP_REGENERATION | GOBP_REGENERATION | 171 | -0.36344988 | -1.636668406 | 0.000445484 | 0.006944825 | 0.005349718 | 3377 | tags=33%, list=22%, signal=26% | MYOZ1/PTPRS/GAP43/JAM3/SGCA/WNT10B/EGFR/MAPK8IP3/NDEL1/SOX2/PTCH1/STK24/YAP1/ISL1/ULK1/HAMP/CEBPB/MSTN/ANGPT2/OMG/PTPN3/ANXA3/HMOX1/KLK8/GLI3/KIAA0319/FGF10/MAP1B/KLK6/FZD7/AKIRIN1/TGFBR2/FLT3/SCARF1/PRRX1/MUSTN1/CPT1A/DUSP10/RGMA/IGF1/TGFBR3/CHL1/CDKN1A/ADM/GATA4/C5AR1/MAG/CD9/NR4A3/NNMT/IL10/TNR/APOD/KLF5/KLF4/IGFBP1/IL6 |
| GOBP_LEUKOCYTE_CELL_CELL_ADHESION | GOBP_LEUKOCYTE_CELL_CELL_ADHESION | 335 | -0.309618707 | -1.52167879 | 0.000445566 | 0.006944825 | 0.005349718 | 1161 | tags=18%, list=7%, signal=17% | ZMIZ1/HES1/GLI3/NRARP/IL23R/IRAK1/SELL/CTLA4/RAC1/LRRC32/CCL25/PLA2G2D/TFRC/PRKCQ/TGFBR2/CCR7/NOD2/IL1A/LILRB2/LEP/MADCAM1/DUSP10/GATA3/IGF1/CCL21/CEACAM1/IRF1/S100A9/FLOT2/JAK3/S100A8/EBI3/EPO/TNFRSF13C/CD274/SIRPA/CSK/TNFSF14/SIRPB1/DTX1/ICAM1/NR4A3/ARG2/SCGB1A1/SLC7A1/EGR3/IL10/PELI1/HAS2/MAP3K8/IL1B/SDC4/NFKBIZ/KLF4/BCL6/IL4R/CCL2/IGFBP2/SOCS1/ZC3H12A/IL6 |
| GOBP_PROXIMAL_DISTAL_PATTERN_FORMATION | GOBP_PROXIMAL_DISTAL_PATTERN_FORMATION | 32 | -0.577638213 | -1.88182904 | 0.0004509 | 0.007011113 | 0.005400781 | 3080 | tags=53%, list=20%, signal=43% | HOXD9/HOXA10/HOXB9/SIX3/HOXD10/HOXA11/HOXA9/HOXC9/GLI3/FGF10/SP8/HES5/IRX2/CHSY1/OSR1/IRX3/LRP4 |
| GOMF_CAMP_DEPENDENT_PROTEIN_KINASE_REGULATOR_ACTIVITY | GOMF_CAMP_DEPENDENT_PROTEIN_KINASE_REGULATOR_ACTIVITY | 10 | 0.783913613 | 1.933357631 | 0.000462439 | 0.007170324 | 0.005523424 | 1637 | tags=40%, list=11%, signal=36% | CXCL10/PKIB/PRKAG1/PRKAR2A |
| GOBP_MYELOID_LEUKOCYTE_DIFFERENTIATION | GOBP_MYELOID_LEUKOCYTE_DIFFERENTIATION | 191 | -0.346824464 | -1.588798209 | 0.000463351 | 0.007170324 | 0.005523424 | 1691 | tags=17%, list=11%, signal=16% | CSF1/IRF4/RELB/TFRC/TGFBR2/CEBPE/CCR7/SH3PXD2A/TGFB1/POU4F2/PRTN3/FOXP1/VEGFA/GATA3/LILRB3/CEACAM1/KLF10/LTBR/TRIB1/POU4F1/CSF3/PLA2G3/IL20/CCL3/ITGB8/JUN/BATF3/SBNO2/LIF/EPHA2/MYC/JUNB/FOS |
| GOBP_SKELETAL_SYSTEM_MORPHOGENESIS | GOBP_SKELETAL_SYSTEM_MORPHOGENESIS | 200 | -0.347093501 | -1.596472695 | 0.000467035 | 0.007210136 | 0.005554092 | 3080 | tags=28%, list=20%, signal=22% | HOXD9/LHX1/FGR/WNT10B/ALX1/SKI/FGF8/HOXB9/INPPL1/NPPC/FGF4/FBN2/HOXD10/FGF6/NOG/TFAP2A/HOXA3/TCF15/HOXA11/HOXA9/HOXA5/HOXC9/ZFAND5/IFITM5/GLI3/BMP6/PAX5/TGFBR2/HOXD8/SIX4/GRHL2/HYAL2/PRRX1/TSKU/CSGALNACT1/MMP2/MGP/LRP5/NDST1/TIPARP/SMAD3/ALPL/HOXB1/ALX4/CHSY1/SOX11/FGFR1/FOXC2/OSR1/MSX1/HAS2/STC1/ARID5B/TGFB3/FOXC1 |
| GOBP_SYNAPTIC_TRANSMISSION_GLUTAMATERGIC | GOBP_SYNAPTIC_TRANSMISSION_GLUTAMATERGIC | 87 | -0.435838879 | -1.734837899 | 0.000473211 | 0.00728813 | 0.005614172 | 3017 | tags=36%, list=19%, signal=29% | EGFR/OXTR/NTRK1/DRD3/GRIA2/GRM2/SHANK1/GRIK4/CACNG5/CNIH3/SHANK3/GRIK3/CDH8/GRM7/GRIK5/NLGN3/GRID1/GRM4/TSHZ3/ATP1A2/GRM3/SLC1A4/NLGN1/CACNG3/CACNG7/HOMER1/CACNG2/ADCYAP1/P2RX1/TNR/CCL2 |
| GOCC_RESPIRASOME | GOCC_RESPIRASOME | 78 | 0.465778177 | 1.867061077 | 0.000483251 | 0.007415954 | 0.005712637 | 5623 | tags=64%, list=36%, signal=41% | COX15/NDUFAF1/NDUFA5/NDUFS4/NDUFA6/NDUFB2/NDUFB1/NDUFB4/NDUFA10/COX7A2L/NDUFA9/NDUFB6/UQCRB/UQCRQ/NDUFV1/UQCRC2/TTC19/COX7A2/SURF1/SDHA/NNT/BCS1L/FOXRED1/NDUFA11/NDUFB10/COX6B1/NDUFC1/NDUFAB1/NDUFB3/NDUFA12/COX6A1/UQCRC1/SDHD/NDUFB5/NDUFS2/OXA1L/SDHC/NDUFA1/NDUFS5/COX4I1/NDUFS8/NDUFS7/NDUFB11/HIGD1A/NDUFA8/NDUFA2/NDUFV2/NDUFA7/NDUFC2/NDUFB7 |
| GOBP_DEFENSE_RESPONSE_TO_VIRUS | GOBP_DEFENSE_RESPONSE_TO_VIRUS | 226 | 0.334437738 | 1.572654342 | 0.000483798 | 0.007415954 | 0.005712637 | 2007 | tags=21%, list=13%, signal=18% | GPAM/CXCL9/CXCL10/OAS1/RTP4/IFIT2/IFI27/IFI6/IFIT3/ELMOD2/TRIM22/MICA/ISG15/TRIM5/IFI44L/DDX58/OAS2/TLR7/RSAD2/BST2/IFIH1/TLR3/IFIT1/OASL/DDIT4/RNASEL/OAS3/SKP2/TLR8/MICB/ABCC9/IL27/DDX60/DHX58/PHB/APOBEC3C/VAMP8/PTPRC/AGBL5/IFIT5/TRAF3/PARP9/AKAP1/PHB2/EIF2AK2/RIPK3/SLFN11 |
| GOBP_LEUKOCYTE_MIGRATION | GOBP_LEUKOCYTE_MIGRATION | 410 | -0.294850727 | -1.474489676 | 0.000485553 | 0.007425291 | 0.00571983 | 2230 | tags=22%, list=14%, signal=19% | CAV1/PLVAP/ARTN/MMP1/ATP1B3/HMOX1/S1PR1/CEACAM6/TGFB2/AIRE/SLC12A2/MMP28/CCL11/WDR1/SELL/CCL8/SLC16A8/DBH/RAC1/LYST/TRPM4/CCL25/CSF1/CXCL5/PGF/FPR2/CX3CL1/CXCR4/PDE4B/DUSP1/PDGFB/TREM1/AKIRIN1/CCL20/CCR7/AZU1/PLCB1/ESAM/RIN3/NOD2/SLC3A2/ATP1B2/TGFB1/LEP/CCL3L3/MTUS1/MADCAM1/PRTN3/VEGFA/CXCL6/GATA3/CCL21/TNFRSF10B/LBP/PSG1/CEACAM1/S100A9/PIP5K1C/S100A8/FFAR2/C10orf99/CCL26/CXCL13/SIRPA/CSF3R/VEGFC/SAA1/C5AR1/CCL3/ANGPT4/CCL7/ICAM1/MAG/B4GALT1/CH25H/IL10/EDN3/CALCA/CXCL2/APOD/CXCL1/THBD/TNFRSF10D/EDN1/SDC4/S100A12/THBS1/CCL2/SERPINE1/IL6 |
| GOBP_POSITIVE_REGULATION_OF_P38MAPK_CASCADE | GOBP_POSITIVE_REGULATION_OF_P38MAPK_CASCADE | 25 | -0.624784311 | -1.930562101 | 0.000488117 | 0.007446942 | 0.005736508 | 1045 | tags=32%, list=7%, signal=30% | BMP2/LEP/VEGFA/SPHK1/IL1B/GADD45B/GADD45G/ZC3H12A |
| GOMF_EXTRACELLULAR_LIGAND_GATED_ION_CHANNEL_ACTIVITY | GOMF_EXTRACELLULAR_LIGAND_GATED_ION_CHANNEL_ACTIVITY | 71 | -0.45150904 | -1.751980263 | 0.000494675 | 0.007529281 | 0.005799935 | 4500 | tags=56%, list=29%, signal=40% | GABRP/GABRA6/GABRA1/GRIN3A/GRIK1/GRIN2C/CHRNA5/CHRNG/GRIN1/HTR3D/CHRNB4/HTR3E/GABRR2/CHRNA7/GABRG3/CHRNB2/CHRNA9/GRIN2D/CHRNA3/GRIA2/GLRA3/HTR3A/CHRNA4/GRIK4/CHRNA6/GABRA5/GRIK3/HTR3B/GLRA1/GRIK5/GABRB2/GRID1/GLRA2/GABRR1/GABRD/GABRA2/CHRNA10/GABRB1/P2RX1/HTR3C |
| GOBP_RESPONSE_TO_REACTIVE_OXYGEN_SPECIES | GOBP_RESPONSE_TO_REACTIVE_OXYGEN_SPECIES | 199 | -0.34589396 | -1.593166319 | 0.000497376 | 0.007531521 | 0.00580166 | 1412 | tags=24%, list=9%, signal=22% | SIRT1/ABL1/MT3/RELA/TRAP1/MAPT/MET/ADA/GCH1/UCP1/HMOX1/TRPA1/KCNC2/CRYGD/NFE2L2/DUSP1/LDHA/CCR7/EGLN1/HYAL2/KLF2/MMP2/MMP3/SPHK1/SOD3/CRYAB/TNFAIP3/KCNA5/GPR37L1/SIRPA/KDM6B/NOS3/NR4A3/RHOB/SCGB1A1/IL10/JUN/ERN1/PPARGC1A/IL18RAP/APOD/FOXO1/EDN1/KLF4/FOSL1/FOS/IL6 |
| GOCC_NEURON_TO_NEURON_SYNAPSE | GOCC_NEURON_TO_NEURON_SYNAPSE | 307 | -0.309722937 | -1.511020299 | 0.00049754 | 0.007531521 | 0.00580166 | 3386 | tags=30%, list=22%, signal=24% | SLC16A3/PTPRS/GAP43/SH3GL3/TIAM1/GPHN/DLGAP1/ADAM22/CPEB1/RNF19A/SYN2/NCK2/SIPA1L1/GRIP1/ATP1A1/ITGA8/SYN3/BAALC/NTSR1/DCLK1/PTCH1/GRIN2D/CHRNA3/BSN/DRD3/GRIA2/SHANK1/TANC1/IGSF11/CTNND2/SLC30A3/GRIK4/DAGLA/CACNG5/USP50/P2RY1/STX1A/PTPRT/CLSTN2/ARC/MAGI2/DBN1/RGS14/SLITRK1/SHANK3/NPTN/MAP1B/EEF2K/CABP1/DNM1/TMEM108/SEMA4F/SLC30A1/GRM7/LZTS1/PDLIM5/GRIK5/PDE4B/DRP2/LRRTM2/PTPRD/NLGN3/SLC8A3/CPEB3/NETO2/CHRM1/GRID1/GSG1L/ATP1B2/NTRK2/MPP2/GRM3/CPEB4/SYT12/NLGN1/DCC/CRYAB/PENK/SYN1/CACNG3/ITPR1/NOS1/SLC4A8/CACNG7/LRFN5/HOMER1/CACNG2/LRP4/SLC8A2/TNIK/SLITRK3 |
| GOBP_REGULATION_OF_HEART_RATE | GOBP_REGULATION_OF_HEART_RATE | 89 | -0.441292404 | -1.761566281 | 0.000498917 | 0.007531521 | 0.00580166 | 2791 | tags=37%, list=18%, signal=31% | ISL1/CACNA2D1/BVES/JUP/SCN5A/ADA/RYR2/GCH1/CAV1/SCN2B/CASQ2/ADRA1D/CACNA1G/RGS4/SPTBN4/SCN3B/KCNH6/TRPM4/AVPR1A/MC3R/SEMA3A/ADRB1/PDE4D/KCNA5/ANK2/KCNE4/ADM/TAC1/NOS1AP/EPAS1/HCN4/EDN3/EDN1 |
| GOBP_REGULATION_OF_NITRIC_OXIDE_METABOLIC_PROCESS | GOBP_REGULATION_OF_NITRIC_OXIDE_METABOLIC_PROCESS | 52 | -0.509791511 | -1.875204975 | 0.000499469 | 0.007531521 | 0.00580166 | 612 | tags=31%, list=4%, signal=30% | RAC1/KHSRP/TICAM1/KLF2/SMAD3/ATP2B4/SIRPA/ICAM1/NOS1AP/IL10/IL1B/EDN1/KLF4/PTX3/PTGS2/ZC3H12A |
| GOCC_PRESYNAPTIC_ACTIVE_ZONE | GOCC_PRESYNAPTIC_ACTIVE_ZONE | 65 | -0.472301257 | -1.801002 | 0.000501316 | 0.007538073 | 0.005806708 | 2757 | tags=37%, list=18%, signal=31% | BSN/CNTNAP1/SYP/P2RY1/STX1B/STX1A/PPFIA4/P2RY4/NPTN/GAD1/GRM7/ERC2/APBA1/SV2A/BRSK1/NUFIP1/SYN1/ATP2B4/PPFIA2/STX11/CDH10/EGFLAM/P2RX1/CPLX3 |
| GOBP_POSITIVE_REGULATION_OF_INFLAMMATORY_RESPONSE | GOBP_POSITIVE_REGULATION_OF_INFLAMMATORY_RESPONSE | 119 | -0.399552958 | -1.687120077 | 0.000502228 | 0.007538073 | 0.005806708 | 1690 | tags=24%, list=11%, signal=22% | NLRP12/FFAR3/CX3CL1/TTBK1/CCR7/HYAL2/TGM2/LBP/S100A9/S100A8/FFAR2/PLA2G2A/OSMR/TAC1/GPR4/PLA2G3/CCL3/TNFRSF1A/CREB3L3/OSM/IL1B/IL1RL1/C2CD4A/S100A12/NFKBIZ/C2CD4B/PTGS2/SERPINE1/IL6 |
| GOBP_ALPHA_BETA_T_CELL_DIFFERENTIATION | GOBP_ALPHA_BETA_T_CELL_DIFFERENTIATION | 103 | -0.413696413 | -1.698081759 | 0.000505291 | 0.007549499 | 0.005815509 | 2018 | tags=22%, list=13%, signal=20% | GLI3/IL23R/TOX/STAT3/IL18R1/IRF4/PRDM1/RELB/PLA2G2D/TGFBR2/FOXP1/GATA3/IRF1/SEMA4A/JAK3/PSMB11/NFKBIZ/BCL6/IL4R/BCL3/SOCS1/ZC3H12A/IL6 |
| GOBP_PROTEIN_LOCALIZATION_TO_KINETOCHORE | GOBP_PROTEIN_LOCALIZATION_TO_KINETOCHORE | 13 | 0.734119032 | 1.958630913 | 0.000505318 | 0.007549499 | 0.005815509 | 1108 | tags=54%, list=7%, signal=50% | NDC80/CENPQ/IK/ZWILCH/AURKB/MIS12/CDT1 |
| GOBP_NEGATIVE_REGULATION_OF_CELL_SUBSTRATE_ADHESION | GOBP_NEGATIVE_REGULATION_OF_CELL_SUBSTRATE_ADHESION | 56 | -0.493165558 | -1.845101407 | 0.000508308 | 0.007576717 | 0.005836476 | 1531 | tags=21%, list=10%, signal=19% | CX3CL1/FZD7/JAG1/EFNA5/FBLN1/APOD/TACSTD2/SPRY4/THBS1/BCL6/SERPINE1/FAM107A |
| GOBP_SKELETAL_MUSCLE_ORGAN_DEVELOPMENT | GOBP_SKELETAL_MUSCLE_ORGAN_DEVELOPMENT | 140 | -0.376207201 | -1.630710819 | 0.000517719 | 0.007699282 | 0.005930889 | 3597 | tags=33%, list=23%, signal=25% | BASP1/MYOCD/HIVEP3/CFL2/MYOZ1/LMOD3/MSC/EGR2/HOXD9/WNT10B/TCF21/SKI/DDX5/ASS1/COL19A1/BVES/MSTN/HOXD10/DISP1/SOX8/VAX1/CAV1/KEL/SAP30/SMYD1/RBM24/WNT3A/CSRP3/PAX5/AKIRIN1/EPHB1/SIX4/TGFB1/ELN/BTG2/PHOX2B/WT1/NPHS1/ATF3/HOMER1/SOX11/MAFF/KLF5/MYOM1/FOS/EGR1 |
| GOBP_RESPONSE_TO_CAMP | GOBP_RESPONSE_TO_CAMP | 90 | -0.429141252 | -1.722241786 | 0.000528127 | 0.007836093 | 0.006036277 | 3134 | tags=31%, list=20%, signal=25% | HCN2/DUOX1/WNT10B/PCK1/ASS1/PTPRN/TYR/ADIPOQ/AGXT/RELA/SRD5A1/CNGA3/EEF2K/CITED1/DUSP1/LDHA/SLC8A3/RAPGEF1/PENK/WT1/MMP19/HCN4/JUN/STC1/THBD/FOSL1/FOS/FOSB |
| GOBP_REGULATION_OF_MACROPHAGE_ACTIVATION | GOBP_REGULATION_OF_MACROPHAGE_ACTIVATION | 51 | -0.51625788 | -1.889159194 | 0.000540526 | 0.00799231 | 0.006156614 | 1531 | tags=31%, list=10%, signal=28% | CX3CL1/TTBK1/TNIP2/LBP/SPHK1/PLA2G10/CCL3/LRFN5/LDLR/IL10/IL1RL1/NR1D1/THBS1/IL4R/ZC3H12A/IL6 |
| GOCC_COLLAGEN_CONTAINING_EXTRACELLULAR_MATRIX | GOCC_COLLAGEN_CONTAINING_EXTRACELLULAR_MATRIX | 399 | -0.294321618 | -1.465204309 | 0.00054112 | 0.00799231 | 0.006156614 | 2098 | tags=20%, list=13%, signal=17% | CBLN1/TGFB2/OTOL1/MMP28/SERPINB8/PLSCR1/MXRA5/FGF10/NID2/PRSS1/SERPINA1/ITGB4/ADAMTS15/MATN4/COL6A1/AMTN/COL8A1/ADAM19/ANXA11/SEMA3B/AMELX/ITIH4/PDGFB/NTN5/LAMA1/ADAMTS20/EMILIN3/ADAMTS4/TNN/COL15A1/TINAGL1/SMOC1/F3/NID1/SULF1/TIMP3/APLP1/NDP/COL4A4/TGFB1/MMP2/TGM2/VWC2/PRTN3/SERPINB1/COL24A1/PCOLCE/ANGPTL5/COL4A3/S100A9/SOD3/MGP/FBLN1/ELN/MFGE8/PRG2/CDH13/S100A8/GPC5/LAMC2/FGF9/ANGPTL4/EGFLAM/LTBP4/VCAN/VWF/ANGPT4/MUC17/ICAM1/SPON1/TNXB/TNR/SERPINB9/THBS1/TGFB3/PZP/SERPINE1/ADAMTS1 |
| GOBP_POSITIVE_REGULATION_OF_EXTRACELLULAR_MATRIX_ORGANIZATION | GOBP_POSITIVE_REGULATION_OF_EXTRACELLULAR_MATRIX_ORGANIZATION | 19 | -0.66969758 | -1.917722033 | 0.000543668 | 0.008006473 | 0.006167524 | 1153 | tags=32%, list=7%, signal=29% | PDPN/BMP2/TGFB1/PHLDB1/SMAD3/IL6 |
| GOCC_ENDOPLASMIC_RETICULUM_GOLGI_INTERMEDIATE_COMPARTMENT_MEMBRANE | GOCC_ENDOPLASMIC_RETICULUM_GOLGI_INTERMEDIATE_COMPARTMENT_MEMBRANE | 64 | 0.473317646 | 1.817934224 | 0.000545 | 0.008006473 | 0.006167524 | 3482 | tags=42%, list=22%, signal=33% | NAT8B/TRIP11/STX17/TM6SF2/F8/GOLGA2/MPPE1/BET1/TMED10/YIF1B/LMAN2/CTSZ/GOSR2/RAB2A/TAP2/COPZ2/LMAN1/ERGIC3/TAPBP/TMED2/CTSC/NAT8/CALR/TMED1/ERGIC2/MCFD2/TBC1D20 |
| GOBP_POSITIVE_REGULATION_OF_LEUKOCYTE_CELL_CELL_ADHESION | GOBP_POSITIVE_REGULATION_OF_LEUKOCYTE_CELL_CELL_ADHESION | 223 | -0.334195908 | -1.566641462 | 0.000545784 | 0.008006473 | 0.006167524 | 1487 | tags=16%, list=10%, signal=15% | TFRC/PRKCQ/TGFBR2/CCR7/NOD2/IL1A/LILRB2/LEP/DUSP10/GATA3/IGF1/CCL21/FLOT2/JAK3/EBI3/EPO/TNFRSF13C/CD274/SIRPA/CSK/TNFSF14/SIRPB1/ICAM1/NR4A3/SLC7A1/EGR3/HAS2/MAP3K8/IL1B/NFKBIZ/BCL6/IL4R/CCL2/IGFBP2/SOCS1/IL6 |
| GOBP_NUCLEOTIDE_EXCISION_REPAIR_DNA_DAMAGE_RECOGNITION | GOBP_NUCLEOTIDE_EXCISION_REPAIR_DNA_DAMAGE_RECOGNITION | 23 | 0.633174941 | 1.929803587 | 0.000567763 | 0.0083101 | 0.006401413 | 2174 | tags=35%, list=14%, signal=30% | XPA/CETN2/COPS4/COPS6/COPS5/COPS2/DDB2/RBX1 |
| GOBP_REGULATION_OF_EPIDERMIS_DEVELOPMENT | GOBP_REGULATION_OF_EPIDERMIS_DEVELOPMENT | 57 | -0.478606133 | -1.792723902 | 0.000571295 | 0.008342968 | 0.006426732 | 2231 | tags=32%, list=14%, signal=27% | VDR/AQP3/HES1/ATOH1/SULT2B1/REG3G/GRHL1/SERPINB13/GRHL2/HES5/GDF3/CYP27B1/PTCH2/IL20/MAFF/SFN/FOXC1/ZFP36 |
| GOBP_POSITIVE_REGULATION_OF_SYNAPTIC_TRANSMISSION_GLUTAMATERGIC | GOBP_POSITIVE_REGULATION_OF_SYNAPTIC_TRANSMISSION_GLUTAMATERGIC | 29 | -0.605106413 | -1.936158517 | 0.00058447 | 0.008514443 | 0.006558822 | 3323 | tags=55%, list=21%, signal=43% | NRXN1/EGFR/OXTR/NTRK1/SHANK1/CACNG5/SHANK3/NLGN3/TSHZ3/NLGN1/CACNG3/CACNG7/CACNG2/ADCYAP1/TNR/CCL2 |
| GOBP_NEGATIVE_REGULATION_OF_CELL_CYCLE_PROCESS | GOBP_NEGATIVE_REGULATION_OF_CELL_CYCLE_PROCESS | 303 | 0.304640686 | 1.473144577 | 0.000585663 | 0.008514443 | 0.006558822 | 3589 | tags=36%, list=23%, signal=28% | GPNMB/NDC80/CDK5RAP2/PTTG1/PSMD10/BRCA1/DTL/MAD2L1/PCNA/CHEK1/ZWINT/AURKA/PKD2/PSMB9/BUB1/TOM1L1/PSMA2/MDM1/CCNF/BRCC3/CDK6/CNOT8/PSMB7/GEN1/PSME2/FZR1/IK/PSMD14/AURKB/CDC73/KANK2/DLG1/DONSON/USP47/CDT1/PSMA4/ZFYVE19/GADD45A/APC/RFPL1/PSMD4/NAE1/APAF1/CHMP2A/NEK2/PSMD7/RPL26/PSMD1/RBBP4/EED/RAD17/TRIAP1/KLHL22/PSMA3/CBX5/TRIP13/FBXO7/ESPL1/PSMD13/MAD2L2/SKP1/KNTC1/SLFN11/XRCC3/NPM1/RBL1/RBX1/RBBP7/PSMD11/NME6/TNKS/DYNC1LI1/CDKN1B/PCGF6/MIF/RB1/ATRX/SYF2/SUSD2/PSMA1/CHEK2/CDC20/PSMB10/CDKN2C/HSP90AB1/PSMC6/PSMB5/CALR/PTEN/BUB3/EVI2B/CLSPN/PSMC4/CDC6/PSMG2/KAT2B/ZNF830/PSMC3/BRD7/MYO16/LCMT1/PSME1/FOXO4/ATM/SUZ12/PSMB1/PRMT2/PSMD2 |
| GOBP_ORGAN_GROWTH | GOBP_ORGAN_GROWTH | 141 | -0.370772399 | -1.611036965 | 0.000587537 | 0.008522568 | 0.006565081 | 2861 | tags=28%, list=18%, signal=23% | FGF8/YAP1/OSTN/NPPC/HAMP/WWC3/NOG/AKAP13/TBX5/ARX/S1PR1/TGFB2/RGS4/FGF10/SLC6A4/PDLIM5/TGFBR2/PROX1/DUSP9/TSKU/LEP/IGF1/TGFBR3/GATA6/PI16/BCL2L11/LEPR/GJA1/RAG2/SPRY2/WT1/LATS2/GATA4/FOXC2/DUSP6/STC1/EDN1/PIM1/RGS2/FOXC1 |
| GOBP_NEGATIVE_REGULATION_OF_FATTY_ACID_METABOLIC_PROCESS | GOBP_NEGATIVE_REGULATION_OF_FATTY_ACID_METABOLIC_PROCESS | 24 | 0.629054403 | 1.931169319 | 0.000594766 | 0.008608174 | 0.006631025 | 964 | tags=17%, list=6%, signal=16% | CYP7A1/SIRT4/BRCA1/ACADL |
| GOBP_DEVELOPMENT_OF_PRIMARY_FEMALE_SEXUAL_CHARACTERISTICS | GOBP_DEVELOPMENT_OF_PRIMARY_FEMALE_SEXUAL_CHARACTERISTICS | 95 | -0.416274641 | -1.68921719 | 0.000596789 | 0.008618219 | 0.006638762 | 2846 | tags=32%, list=18%, signal=26% | DMC1/ACVR1B/PTPRN/EREG/SIRT1/CEBPB/PCYT1B/SPO11/DACH2/RETN/MSH4/LHX9/SLIT3/CYP19A1/GPR149/BMP15/LEP/VEGFA/LHX8/TIPARP/WT1/MMP19/ICAM1/ADCYAP1/FST/ARID5B/INHBB/PTX3/FOXC1/ADAMTS1 |
| GOBP_REGULATION_OF_CELL_PROLIFERATION_INVOLVED_IN_KIDNEY_DEVELOPMENT | GOBP_REGULATION_OF_CELL_PROLIFERATION_INVOLVED_IN_KIDNEY_DEVELOPMENT | 12 | -0.764272726 | -1.89114069 | 0.000604815 | 0.008714706 | 0.006713088 | 1398 | tags=42%, list=9%, signal=38% | PDGFB/GATA3/WT1/MYC/EGR1 |
| GOMF_CYTOKINE_RECEPTOR_BINDING | GOMF_CYTOKINE_RECEPTOR_BINDING | 236 | -0.338266208 | -1.594896039 | 0.000607273 | 0.00873073 | 0.006725432 | 3007 | tags=30%, list=19%, signal=25% | IL4/BAMBI/NTF3/IFNG/FKBP1A/CCL23/PRL/TNFSF11/CCL22/NTRK1/IL17F/IFNA21/IL12A/SPRED1/TRAP1/DEFB103A/TRAF4/TNFSF9/TGFB2/CCL11/IL23R/CCL8/IFNA14/CCL25/CSF1/IFNA8/CXCL5/PGF/CX3CL1/CTF1/TGFBR2/CCL20/IL11/IL1A/TGFB1/CCL3L3/NTF4/SPRED2/EFNA5/VEGFA/CXCL6/GATA3/IL1RAP/CCL21/DEFB106B/TGFBR3/C10orf99/SMAD3/CCL26/CXCL13/EPO/CSF3/OSMR/VEGFC/IL20/CCL3/TNFSF14/CCL7/IL10/LRG1/IL1RN/OSM/CXCL2/IL1B/CXCL1/LIF/TGFB3/CLCF1/CCL2/SOCS2/IL6 |
| GOBP_NEGATIVE_REGULATION_OF_RECEPTOR_SIGNALING_PATHWAY_VIA_JAK_STAT | GOBP_NEGATIVE_REGULATION_OF_RECEPTOR_SIGNALING_PATHWAY_VIA_JAK_STAT | 22 | -0.650765524 | -1.938530275 | 0.000613713 | 0.008794861 | 0.006774833 | 41 | tags=23%, list=0%, signal=23% | PTPRD/SOCS3/BCL3/SOCS2/SOCS1 |
| GOBP_CELL_FATE_COMMITMENT | GOBP_CELL_FATE_COMMITMENT | 236 | -0.338091039 | -1.594070135 | 0.000616544 | 0.008794861 | 0.006774833 | 2524 | tags=25%, list=16%, signal=21% | HOXD10/NKX2-1/SPDEF/ACVR1/DBX1/SOX8/MCL1/HOXA11/TBX5/ARX/SOX1/WNT7B/HES1/DKK1/GLI3/IL23R/FGF10/TOX/WNT3A/STAT3/IRF4/PRDM1/ATOH1/FZD7/PTF1A/NKX2-2/POU3F2/GBX1/PROX1/MYT1L/GCM1/TEAD3/PRRX1/PDPN/EBF2/BMP2/JAG1/NTF4/GATA3/HES5/PRDM14/GATA6/GDF3/POU4F1/RAG2/SPRY2/PTCH2/HOXA13/KDM6B/TCF7L2/WT1/GATA4/EPAS1/WNT3/FOXC2/TRIM15/SOX17/KLF4/IL6 |
| GOBP_NEPHRON_MORPHOGENESIS | GOBP_NEPHRON_MORPHOGENESIS | 71 | -0.447244401 | -1.735432283 | 0.000617247 | 0.008794861 | 0.006774833 | 3078 | tags=35%, list=20%, signal=28% | LHX1/TCF21/FGF8/PTCH1/SOX8/NOG/WNK4/HOXA11/HES1/GLI3/GZF1/CITED1/SIX4/BMP2/VEGFA/GATA3/HES5/IRX2/ADAMTS16/WT1/OSR1/IRX3/TACSTD2/LIF/MYC |
| GOBP_POSITIVE_REGULATION_OF_PEPTIDYL_TYROSINE_PHOSPHORYLATION | GOBP_POSITIVE_REGULATION_OF_PEPTIDYL_TYROSINE_PHOSPHORYLATION | 182 | -0.351997296 | -1.601623137 | 0.000617981 | 0.008794861 | 0.006774833 | 3946 | tags=37%, list=25%, signal=28% | IL3/DLG4/NRG1/CSH2/GH1/CCK/CLEC7A/IL23A/LILRA5/CD80/TNFRSF18/ACE/IL13/EFNA1/TGFA/GH2/RIPK2/IFNA2/AFAP1L2/IL4/NTF3/IFNG/FGF8/ISL1/EREG/ADIPOQ/CSPG4/ABL1/GHRL/IL12A/ACVR1/EHD4/HES1/IL23R/FGF10/PTPN1/BMP6/WNT3A/STAT3/IL24/CTF1/PDGFB/IL11/FLT3/NOD2/TGFB1/LEP/NTRK2/EFNA5/VEGFA/IGF1/HES5/NEDD9/EPO/CSF3/IL20/ANGPT4/ICAM1/CASS4/TNFRSF1A/OSM/LRP4/HBEGF/LIF/CLCF1/SOCS3/IL6 |
| GOBP_VASCULAR_TRANSPORT | GOBP_VASCULAR_TRANSPORT | 87 | -0.431304198 | -1.716787799 | 0.000619872 | 0.008794861 | 0.006774833 | 2845 | tags=40%, list=18%, signal=33% | SLC7A5/INSR/ABCC1/SLC38A1/SLC16A12/SLCO1C1/SLC6A20/SLC12A2/SLC24A3/SLC29A4/SLC6A6/SLC5A6/SLC38A2/AVPR1A/SLC9A3R1/SLC38A3/SLC6A17/TFRC/LRP2/SLC27A1/SLC22A3/ATP1B2/SLC16A7/ATP1A2/SLC1A4/LEPR/ATP2B4/SLC4A8/GJA1/SLC5A1/SLC7A1/SLC7A2/SLC22A8/SLC2A3/SLC8A2 |
| GOMF_SERINE_TYPE_ENDOPEPTIDASE_INHIBITOR_ACTIVITY | GOMF_SERINE_TYPE_ENDOPEPTIDASE_INHIBITOR_ACTIVITY | 87 | -0.431320953 | -1.716854493 | 0.000619872 | 0.008794861 | 0.006774833 | 4239 | tags=44%, list=27%, signal=32% | SERPINA3/SPINK6/TFPI/WFDC10A/WFDC5/SERPINF2/ITIH5/SPOCK1/COL6A3/PI3/SERPING1/SPINT3/SPINK9/FURIN/SERPINB4/WFDC2/CRIM1/PAPLN/A2M/WFDC12/WFDC3/WFDC10B/SERPINB8/SERPINA1/WFIKKN2/WFDC9/SERPINB5/ITIH4/SERPINB13/A2ML1/SERPINB1/SPINK5/SPINK7/SPINK4/SERPINB2/SERPINB9/PZP/SERPINE1 |
| GOBP_ACTIVATION_OF_PROTEIN_KINASE_ACTIVITY | GOBP_ACTIVATION_OF_PROTEIN_KINASE_ACTIVITY | 304 | -0.309511594 | -1.509863089 | 0.000626002 | 0.008862435 | 0.006826887 | 3017 | tags=25%, list=19%, signal=21% | EGFR/MAPK8IP3/IL4/NTF3/DUSP7/TNFSF11/NTRK1/CHRNA3/INSR/SPDYA/CSPG4/ABL1/MT3/GHRL/BRAF/CARTPT/DUSP19/TRAF4/MAP3K6/ADCY4/DBF4B/TGFB2/IL23R/IRAK1/FGF10/PTPN1/AVPI1/PDGFC/BIRC7/MAP2K3/ADCY5/CXCR4/ADCY3/PDGFB/TGFBR2/DUSP9/NOD2/NTRK3/GRM4/MAS1/BMP2/LEP/AXIN1/MAPKAPK2/EFNA5/VEGFA/IGF1/RAPGEF1/TNFRSF10B/IRAK2/DUSP5/PROK1/EPO/SAA1/ADRB2/C5AR1/ANGPT4/S1PR2/IGFBP6/SBK2/FPR1/SLC11A1/DUSP6/ERN1/CALCA/LPAR1/MAP3K8/MAP3K14/IL1B/TNIK/THBS1/GADD45B/TGFB3/GPRC5A/PROK2/GADD45G/SOCS1 |
| GOBP_REGULATION_OF_CELLULAR_AMINO_ACID_METABOLIC_PROCESS | GOBP_REGULATION_OF_CELLULAR_AMINO_ACID_METABOLIC_PROCESS | 60 | 0.477161191 | 1.817435019 | 0.000629016 | 0.008885708 | 0.006844814 | 4648 | tags=60%, list=30%, signal=42% | SIRT4/PSMD10/OAZ2/PSMB9/PSMA2/PSMB7/PSME2/PSMD14/PSMA4/PSMD4/PSMD7/PSMD1/PSMA3/PSMD13/PSMD11/SLC7A7/NR1H4/PSMA1/PSMB10/PSMC6/PSMB5/PARK7/PSMC4/NQO1/PSMC3/PSME1/BHMT/PSMB1/PSMD2/ACMSD/PSMA5/PSMC5/PSMB8/OAZ3/PSMB4/CLN3 |
| GOCC_PERICENTRIOLAR_MATERIAL | GOCC_PERICENTRIOLAR_MATERIAL | 18 | 0.692113628 | 1.987819252 | 0.000641607 | 0.009043871 | 0.006966649 | 2481 | tags=61%, list=16%, signal=51% | CDK5RAP2/TUBG2/BBS4/TUBE1/NEDD1/CEP152/LCK/NEK1/TNKS/CEP192/NIN |
| GOBP_CELLULAR_RESPONSE_TO_LIPID | GOBP_CELLULAR_RESPONSE_TO_LIPID | 500 | -0.280901184 | -1.431809825 | 0.000651009 | 0.009156495 | 0.007053405 | 2854 | tags=26%, list=18%, signal=22% | HNRNPU/PTCH1/ASS1/YAP1/ISL1/NFKB1/ZBTB7A/CRY1/KCNK4/SIRT1/ABL1/HAMP/CEBPB/SSTR5/ESR2/RELA/MSTN/OSBPL7/LCOR/NFKBIA/HEY1/CD14/KCNMB1/VDR/ABHD2/UCP1/PHEX/SRD5A1/LDOC1/ZMIZ1/WNT7B/AKAP8/NFKBIB/IRAK1/IRF8/SLC6A4/NFATC4/ADNP2/BMP6/WNT3A/TBXA2R/IL24/FFAR3/TICAM1/NCOR1/CST11/ELK1/CXCL5/MN1/ADCY5/LMO3/CX3CL1/TRERF1/FZD7/NR2E3/TNFRSF1B/DDX54/ADCY3/NKX3-1/PDE4B/GJB3/PMEPA1/CEBPE/WBP2/FLT3/KLF9/NOD2/TNIP2/IL1A/CYP24A1/LILRB2/TGFB1/CPT1A/POU4F2/LEP/NPC1/AXIN1/ABL2/SCGB2A1/FOXP1/CXCL6/ATP1A2/SGK1/LBP/IRAK2/GHSR/TNFAIP3/PENK/ZFP36L2/BCL2L11/FFAR2/TRIB1/POU4F1/CXCL13/TFAP4/CYP27B1/CSF3/CD274/SIRPA/CCL3/ICAM1/TNIP3/WNT3/TEAD2/NR4A3/ADCYAP1/OSR1/IL10/CCDC62/SBNO2/STC1/CXCL2/LPAR1/PPARGC1A/IL1B/CXCL1/NR1D1/FOXO1/EDN1/PIM1/SCNN1B/KLF4/CCL2/ZFP36/SERPINE1/FAM107A/ZC3H12A/IL6 |
| GOBP_CD4_POSITIVE_ALPHA_BETA_T_CELL_DIFFERENTIATION | GOBP_CD4_POSITIVE_ALPHA_BETA_T_CELL_DIFFERENTIATION | 78 | -0.446824799 | -1.75224389 | 0.000674587 | 0.009467581 | 0.007293041 | 1986 | tags=23%, list=13%, signal=20% | IL23R/TOX/STAT3/IL18R1/IRF4/RELB/PLA2G2D/FOXP1/GATA3/SEMA4A/JAK3/NFKBIZ/BCL6/IL4R/BCL3/SOCS1/ZC3H12A/IL6 |
| GOBP_REGULATION_OF_T_CELL_ACTIVATION | GOBP_REGULATION_OF_T_CELL_ACTIVATION | 305 | -0.30519316 | -1.489093693 | 0.000677233 | 0.009478738 | 0.007301635 | 2064 | tags=19%, list=13%, signal=17% | ZMIZ1/HES1/GLI3/NRARP/IL23R/TOX/CTLA4/RAC1/LRRC32/IRF4/PRDM1/PLA2G2D/TNFRSF1B/TFRC/PRKCQ/TGFBR2/CCR7/NFATC2/NOD2/IL1A/LILRB2/LEP/DUSP10/GATA3/IGF1/CCL21/CEACAM1/SPINK5/IRF1/FLOT2/JAK3/EBI3/EPO/TNFRSF13C/CD274/SIRPA/CSK/TNFSF14/SIRPB1/DTX1/ARG2/SCGB1A1/SLC7A1/EGR3/IL10/PELI1/MAP3K8/IL1B/SDC4/NFKBIZ/BCL6/IL4R/CCL2/IGFBP2/SOCS1/ZC3H12A/IL6 |
| GOBP_LEUKOCYTE_AGGREGATION | GOBP_LEUKOCYTE_AGGREGATION | 13 | -0.739690935 | -1.882085675 | 0.000678306 | 0.009478738 | 0.007301635 | 766 | tags=38%, list=5%, signal=37% | S100A9/S100A8/NR4A3/HAS2/IL1B |
| GOBP_HEART_GROWTH | GOBP_HEART_GROWTH | 77 | -0.447121738 | -1.745207135 | 0.000685144 | 0.0095537 | 0.00735938 | 2386 | tags=30%, list=15%, signal=25% | NOG/AKAP13/TBX5/S1PR1/TGFB2/RGS4/PDLIM5/TGFBR2/PROX1/DUSP9/IGF1/TGFBR3/GATA6/PI16/GJA1/WT1/GATA4/FOXC2/DUSP6/EDN1/PIM1/RGS2/FOXC1 |
| GOBP_LUNG_MORPHOGENESIS | GOBP_LUNG_MORPHOGENESIS | 47 | -0.504883015 | -1.813759019 | 0.000688118 | 0.00957459 | 0.007375471 | 3034 | tags=36%, list=20%, signal=29% | TCF21/FGF8/YAP1/NKX2-1/NOG/HOXA5/WNT7B/FGF10/SPRY1/STK40/TGFBR2/LAMA1/GRHL2/SPRY2/SOX11/SRF/LIF |
| GOBP_REGULATION_OF_CELL_SUBSTRATE_ADHESION | GOBP_REGULATION_OF_CELL_SUBSTRATE_ADHESION | 196 | -0.336257068 | -1.544957983 | 0.000695897 | 0.009662084 | 0.00744287 | 1868 | tags=17%, list=12%, signal=15% | SLC9A1/RAC1/COL8A1/VCL/CCL25/CSF1/CX3CL1/FZD7/PDGFB/CCR7/PDPN/NID1/JAG1/VWC2/EFNA5/VEGFA/CCL21/FBLN1/CDH13/GPM6B/SMAD3/NEDD9/EGFLAM/MYADM/CASS4/HAS2/APOD/TACSTD2/SDC4/SPRY4/THBS1/BCL6/SERPINE1/FAM107A |
| GOCC_INTRINSIC_COMPONENT_OF_PRESYNAPTIC_ACTIVE_ZONE_MEMBRANE | GOCC_INTRINSIC_COMPONENT_OF_PRESYNAPTIC_ACTIVE_ZONE_MEMBRANE | 14 | -0.719278206 | -1.869826509 | 0.000711299 | 0.009845603 | 0.007584237 | 2460 | tags=50%, list=16%, signal=42% | P2RY1/P2RY4/NPTN/ATP2B4/CDH10/P2RX1/CPLX3 |
| GOBP_RESPONSE_TO_CALCIUM_ION | GOBP_RESPONSE_TO_CALCIUM_ION | 136 | -0.377912774 | -1.631911186 | 0.000712151 | 0.009845603 | 0.007584237 | 3539 | tags=35%, list=23%, signal=27% | CPNE4/PTGES/CPNE7/FGG/LCE1D/STIM1/SMPD1/CPNE2/SYT4/FGA/EGFR/JUND/ITPKB/BRAF/SCN5A/KCNMB4/TRPV6/RYR2/KCNMB1/CAV1/SYT15/CASQ2/CPNE8/APOBEC1/AQP3/SLC25A12/EEF2K/RASA4/ANXA11/AMELX/DUSP1/TPH2/ACER1/CPNE6/SYT12/NLGN1/PENK/TRPC1/ALOX5AP/HPCA/HOMER1/CACNG2/EDN1/THBS1/JUNB/FOS/FOSB |
| GOBP_CILIARY_BASAL_BODY_PLASMA_MEMBRANE_DOCKING | GOBP_CILIARY_BASAL_BODY_PLASMA_MEMBRANE_DOCKING | 80 | 0.440857552 | 1.779785555 | 0.000718096 | 0.009906665 | 0.007631274 | 4957 | tags=46%, list=32%, signal=32% | NINL/CDK5RAP2/CETN2/CEP290/TUBG1/DYNC1I2/CEP78/SDCCAG8/NEDD1/CEP250/NEK2/CEP152/TCTN1/CEP70/CEP63/CEP192/DYNLL1/PLK4/DYNC1H1/CENPJ/PRKACA/IQCB1/TCTN2/B9D1/PAFAH1B1/ALMS1/OFD1/CEP97/HSP90AA1/YWHAE/AKAP9/DCTN3/ACTR1A/CEP76/RPGRIP1L/CEP72/PRKAR2B |
| GOMF_GLYCOSAMINOGLYCAN_BINDING | GOMF_GLYCOSAMINOGLYCAN_BINDING | 203 | -0.341677622 | -1.579402858 | 0.00072 | 0.00991184 | 0.007635261 | 1977 | tags=23%, list=13%, signal=20% | FGF10/SELL/CCL8/ADAMTS15/DPYSL3/SLIT3/PGLYRP3/HAPLN3/PGF/PLA2G2D/REG3G/TGFBR2/LPA/AZU1/BSPH1/HYAL2/RSPO1/NOD2/SMOC1/NELL1/SULF1/FGFRL1/APLP1/VEGFA/CXCL6/PCOLCE/DEFB106B/SOD3/TGFBR3/PRG2/ELSPBP1/CXCL13/LAMC2/FGF9/EGFLAM/SAA1/LTBP4/GREM2/VCAN/CCL7/FGFR1/TNXB/TNFAIP6/CRISPLD2/HBEGF/THBS1/ADAMTS1 |
| GOBP_FATTY_ACID_METABOLIC_PROCESS | GOBP_FATTY_ACID_METABOLIC_PROCESS | 341 | 0.296892923 | 1.457953 | 0.000731916 | 0.01003289 | 0.007728508 | 3021 | tags=27%, list=19%, signal=22% | CYP7A1/GPAM/ADH5/FADS2/LPL/ACOT12/PRKAA2/FABP5/SIRT4/PDP2/FADS1/PRKAB2/AMACR/ACBD5/PLA2G1B/BRCA1/HPGD/ELOVL6/PNPLA3/AOAH/ACSS2/ACOT1/ELOVL2/LIAS/ECHDC1/DLD/ACADL/CD36/SLC45A3/RGN/HADH/ANGPTL3/ACOT8/PRKAG1/ACAA1/HAO1/PTGR2/BDH2/ACSM2B/PTGR1/NUDT7/ELOVL1/ACSM1/AACS/PHYH/ACSM5/IRS1/SCP2/DECR1/APOA5/HACL1/LYPLA1/ACADM/MID1IP1/CYP2U1/PCCB/ABCD2/ACSM3/THNSL2/AUH/SGPL1/CYP4F2/HSD17B8/PLA2G4A/PTGES2/ABHD1/CROT/EHHADH/ABCD3/GNPAT/HSD17B10/PANK2/AASDH/TYSND1/MIF/ELOVL5/MAPK3/ACSF2/FASN/SCD/PON2/PLA2G4C/CPT1B/PEX7/ETFA/ACAT2/PECR/CYP2C18/MCEE/ASAH1/APOC1/CBR4 |
| GOCC_SCF_UBIQUITIN_LIGASE_COMPLEX | GOCC_SCF_UBIQUITIN_LIGASE_COMPLEX | 58 | 0.473542696 | 1.782153342 | 0.000732264 | 0.01003289 | 0.007728508 | 5318 | tags=64%, list=34%, signal=42% | FBXO27/FBXO2/SKP2/CCNF/FBXO48/USP47/FBXO6/CUL5/FBXO7/SKP1/BTRC/CKS1B/RBX1/FBXO25/AMN1/FBXL4/FBXL5/FBXL17/CKS2/FBXO4/FBXW5/CACYBP/FBXO38/SPSB2/FBXO17/FBXO32/TRIM21/FBXW7/FBXL18/CUL1/FBXL14/FBXW8/FBXL3/FBXL7/FBXL19/FBXW4/FBXL15 |
| GOBP_INTERSTRAND_CROSS_LINK_REPAIR | GOBP_INTERSTRAND_CROSS_LINK_REPAIR | 43 | 0.531872838 | 1.857875385 | 0.000733435 | 0.01003289 | 0.007728508 | 4294 | tags=53%, list=28%, signal=39% | FANCL/XPA/UBE2T/RAD51AP1/FANCI/WDR48/FANCC/DCLRE1A/FANCG/XRCC3/RPA3/DCLRE1C/DCLRE1B/ERCC4/RNF8/VCP/EME1/MCM8/RPS27A/FANCM/RPA1/USP1/RFWD3 |
| GOMF_OXIDOREDUCTASE_ACTIVITY_ACTING_ON_NAD_P_H | GOMF_OXIDOREDUCTASE_ACTIVITY_ACTING_ON_NAD_P_H | 89 | 0.431732162 | 1.794690156 | 0.000738401 | 0.010079566 | 0.007764463 | 5623 | tags=62%, list=36%, signal=40% | TP53I3/CYB5R2/COX15/NDUFA5/NDUFS4/NDUFA6/NQO2/DLD/TXNDC17/NDUFB2/NDUFB1/GMPR2/CYB5R1/AIFM2/PRDX3/NDUFB4/CRYZ/NDUFA10/CRYZL1/NDUFA9/NDUFB6/CYB5RL/NDUFV1/CYB5R4/TXN/AIFM1/CBR4/NQO1/PGK1/NNT/NDUFB10/NDUFC1/NCF2/NDUFAB1/NDUFB3/NDUFA12/AKR1C3/CBR1/NDUFB5/NDUFS2/CYBB/NDUFA1/AKR1C4/AKR1C1/NDUFS5/NDUFS8/NDUFS7/TXNRD1/ADH4/NDUFA8/NDUFA2/NDUFV2/NDUFA7/NDUFC2/NDUFB7 |
| GOCC_PHOSPHATIDYLINOSITOL_3_KINASE_COMPLEX | GOCC_PHOSPHATIDYLINOSITOL_3_KINASE_COMPLEX | 26 | -0.608002081 | -1.900817283 | 0.000741458 | 0.010100028 | 0.007780226 | 107 | tags=15%, list=1%, signal=15% | CISH/SOCS3/SOCS2/SOCS1 |
| GOBP_KIDNEY_MORPHOGENESIS | GOBP_KIDNEY_MORPHOGENESIS | 88 | -0.419140322 | -1.676052124 | 0.000744637 | 0.01012207 | 0.007797205 | 3211 | tags=42%, list=21%, signal=34% | HOXD11/GDNF/WNT1/BASP1/LAMA5/FOXJ1/LHX1/TCF21/FGF8/PTCH1/WWTR1/SOX8/NOG/WNK4/HOXA11/FRAS1/WNT7B/HES1/GLI3/FGF10/ASXL1/GZF1/CITED1/GCNT3/SIX4/BMP2/VEGFA/GATA3/HES5/IRX2/ADAMTS16/WT1/OSR1/IRX3/TACSTD2/LIF/MYC |
| GOBP_CELLULAR_RESPONSE_TO_HYDROGEN_PEROXIDE | GOBP_CELLULAR_RESPONSE_TO_HYDROGEN_PEROXIDE | 79 | -0.437846293 | -1.726024674 | 0.000748156 | 0.010147897 | 0.0078171 | 972 | tags=18%, list=6%, signal=17% | KLF2/SPHK1/TNFAIP3/GPR37L1/SIRPA/KDM6B/NR4A3/RHOB/IL10/ERN1/IL18RAP/FOXO1/KLF4/IL6 |
| GOCC_POSTSYNAPTIC_DENSITY_MEMBRANE | GOCC_POSTSYNAPTIC_DENSITY_MEMBRANE | 76 | -0.437776999 | -1.713752583 | 0.000752735 | 0.010147897 | 0.0078171 | 3441 | tags=53%, list=22%, signal=41% | CNIH2/GRM1/GRIA1/PRRT2/LRRC4B/CACNA1C/CNKSR2/CACNG8/PRR7/SEMA4C/ACTN2/GRIN2C/DLG4/LRFN2/SLC16A3/PTPRS/TIAM1/ADAM22/GRIN2D/DRD3/GRIA2/DAGLA/CACNG5/PTPRT/CLSTN2/ARC/SLITRK1/NPTN/SLC30A1/GRIK5/LRRTM2/CHRM1/GRID1/GSG1L/DCC/CACNG3/CACNG7/LRFN5/CACNG2/SLITRK3 |
| GOBP_VIRAL_GENE_EXPRESSION | GOBP_VIRAL_GENE_EXPRESSION | 183 | 0.352772014 | 1.615696829 | 0.000754004 | 0.010147897 | 0.0078171 | 4566 | tags=42%, list=29%, signal=30% | RPS4Y1/HEXIM1/RPS21/MDFIC/CCL5/POLR2K/MCTS1/TRIM32/TRIM14/SNW1/SEC13/RPL7A/RPS26/NUP93/POLR2E/TRIM31/SSB/RPSA/POLR2G/NUP43/RPS7/POLR2L/USF1/RPL26/CSDE1/RPL23A/RPL37/RPL7/NUP37/EIF3F/RPL35A/RPL13A/POLR2B/RPS23/LARP7/RPS29/RPL8/MID2/RPL15/RPLP0/NUP85/RPL34/SPCS3/RPL17/RPS3A/RPL41/TARDBP/RPS2/ZNF639/NUP54/UBP1/RPL29/POLR2J/PSMC3/RPL9/SUPT4H1/RPL11/TAF11/RSF1/RPS15A/RPL3/RPL21/TRIM21/RPS27A/RPS3/RPL31/RPS9/RPL27A/GTF2F2/RPS24/RPS12/POLR2F/DHX9/RPS8/RPL23/AAAS/LEF1 |
| GOBP_POSITIVE_REGULATION_OF_TYROSINE_PHOSPHORYLATION_OF_STAT_PROTEIN | GOBP_POSITIVE_REGULATION_OF_TYROSINE_PHOSPHORYLATION_OF_STAT_PROTEIN | 64 | -0.468717613 | -1.783043573 | 0.000755722 | 0.010147897 | 0.0078171 | 3946 | tags=45%, list=25%, signal=34% | IL3/CSH2/GH1/IL23A/TNFRSF18/IL13/GH2/IFNA2/IL4/IFNG/ISL1/IL12A/HES1/IL23R/STAT3/IL24/CTF1/FLT3/LEP/IGF1/HES5/EPO/IL20/TNFRSF1A/OSM/LIF/CLCF1/SOCS3/IL6 |
| GOBP_POSITIVE_REGULATION_OF_HEART_RATE | GOBP_POSITIVE_REGULATION_OF_HEART_RATE | 25 | -0.609054357 | -1.881957082 | 0.000755928 | 0.010147897 | 0.0078171 | 2270 | tags=52%, list=15%, signal=44% | ADA/RYR2/GCH1/ADRA1D/RGS4/SCN3B/TRPM4/AVPR1A/ADRB1/PDE4D/ADM/EDN3/EDN1 |
| GOMF_CALCIUM_CHANNEL_REGULATOR_ACTIVITY | GOMF_CALCIUM_CHANNEL_REGULATOR_ACTIVITY | 40 | -0.521246439 | -1.809039383 | 0.000755928 | 0.010147897 | 0.0078171 | 3323 | tags=52%, list=21%, signal=41% | NRXN1/REM2/STIM1/CABP4/GNB2/GRM2/PACSIN3/CACNG1/STX1A/REM1/NPY/HPCAL4/SLC30A1/CACNG6/SGK1/GRM3/CABP2/ITPR1/CACNG7/GEM/TSPAN13 |
| GOBP_RESPONSE_TO_OXYGEN_LEVELS | GOBP_RESPONSE_TO_OXYGEN_LEVELS | 349 | -0.297568126 | -1.462775353 | 0.000758785 | 0.010165214 | 0.007830439 | 2270 | tags=21%, list=15%, signal=18% | ADA/RYR2/KCNMB1/CAV1/SLC11A2/AQP3/TH/HMOX1/TGFB2/B3GAT1/CLCA1/IRAK1/UCN3/SLC6A4/EEF2K/SLC9A1/HIF3A/NFE2L2/PGF/NOX1/COX4I2/PMAIP1/CXCR4/NKX3-1/LDHA/TGFBR2/EGLN1/SLC8A3/MTHFR/HIPK2/PDPN/BMP2/POU4F2/LEP/MMP2/PLOD2/VEGFA/SOD3/CPEB4/TGFBR3/GATA6/CRYAB/KCNA5/CYP1A1/PENK/STC2/PSMB11/SMAD3/ITPR1/NOS1/EPO/CDKN1A/ANGPTL4/CA9/VEGFC/ADM/TRH/ANGPT4/ICAM1/EPAS1/SRF/STC1/LPAR1/PPARGC1A/FOXO1/EDN1/THBS1/TGFB3/PTGS2/NR4A2/APOLD1/MYC/EGR1 |
| GOBP_REGULATION_OF_CELLULAR_RESPONSE_TO_GROWTH_FACTOR_STIMULUS | GOBP_REGULATION_OF_CELLULAR_RESPONSE_TO_GROWTH_FACTOR_STIMULUS | 254 | -0.324870047 | -1.54199546 | 0.000763332 | 0.010205039 | 0.007861117 | 3007 | tags=30%, list=19%, signal=25% | IL4/BAMBI/SKI/SPINT3/NTF3/FGFBP1/ZBTB7A/IL17F/FGF4/FBN2/SIRT1/FAM89B/ABL1/MT3/SPRY3/CRIM1/IL12A/SEMA6A/NKX2-1/SPRED1/NOG/CAV1/SHISA2/CDKN2B/HTRA4/HES1/NPTN/FGF10/PTPN1/RNF165/PRDM16/SPRY1/PPP2R5B/WFIKKN2/TMEM108/CITED1/LRP2/PMEPA1/TGFBR2/TFAP2B/HIPK2/NTRK3/SULF1/TGFB1/LOX/VWC2/SPRED2/GOT1/GATA3/HES5/PRDM14/TGFBR3/GDF3/CHRDL1/SMAD3/ATP2B4/CXCL13/SPRY2/HOXA13/VEGFC/LATS2/GATA4/LTBP4/GREM2/SOX11/FGFR1/CHRD/MSX1/LRG1/GDF5/FST/DAND5/IL1B/SPRY4/THBS1/TGFB3 |
| GOBP_POSITIVE_REGULATION_OF_DEVELOPMENTAL_GROWTH | GOBP_POSITIVE_REGULATION_OF_DEVELOPMENTAL_GROWTH | 153 | -0.367294408 | -1.622650397 | 0.000766222 | 0.010222597 | 0.007874643 | 2884 | tags=29%, list=19%, signal=24% | NDEL1/FGF8/YAP1/ATP8A2/INSR/AGR2/HAMP/GHRL/DIO3/MAPT/TBX5/ARX/DBN1/ZFYVE27/MAP1B/SPTBN4/WNT3A/CSF1/ISLR2/CXCR4/POU3F2/TGFBR2/PROX1/GHRH/PLCB1/CPNE6/POU4F2/LEP/VEGFA/IGF1/GHSR/TGFBR3/GATA6/RND2/RAG2/WT1/CACNG7/WNT3/SRF/CDH4/SLC23A2/EDN1/PIM1/VIL1 |
| GOBP_HORMONE_TRANSPORT | GOBP_HORMONE_TRANSPORT | 289 | -0.320061988 | -1.554096853 | 0.000769036 | 0.010239077 | 0.007887337 | 3320 | tags=31%, list=21%, signal=25% | FGG/TIAM1/TFR2/SLC16A1/CRH/CACNA1A/ACVR1C/CACNA1E/FGA/EGFR/SYTL4/IFNG/ALOX5/TNFSF11/MTNR1B/SLC7A5/GLP1R/FOXA2/ISL1/PTPRN/C1QTNF1/CRY1/ABCC8/ADIPOQ/ITSN1/GHRL/SSTR5/P2RY1/SLCO1C1/CARTPT/G6PC2/STX1A/TRPV6/CCKAR/VIP/RETN/AGTR1/UCN3/KCNC2/KALRN/RAC1/BMP6/TRPM4/CYP19A1/FFAR3/DOC2B/KCNG2/ADCY5/NKX3-1/IL11/GHRH/SLCO4A1/TFAP2B/SLC30A8/CPT1A/LEP/KCNS3/EFNA5/GATA3/GHSR/LRP5/KCNA5/FFAR2/ITPR1/GJA1/PER2/RASL10B/TCF7L2/GPR27/ADM/TAC1/LTBP4/PLA2G3/TRH/SOX11/CPLX1/ADCYAP1/CPLX3/IL1RN/OSM/EDN3/IRS2/IL1B/INHBB/NR1D1/PIM3/EDN1/LIF/MIDN/IL6 |
| GOBP_MODULATION_OF_EXCITATORY_POSTSYNAPTIC_POTENTIAL | GOBP_MODULATION_OF_EXCITATORY_POSTSYNAPTIC_POTENTIAL | 42 | -0.530546625 | -1.861623646 | 0.00079349 | 0.010543005 | 0.008121458 | 4331 | tags=60%, list=28%, signal=43% | NPY2R/SHANK2/DLG4/RIMS1/RIMS2/GRIN1/NRXN1/CHRNA7/SHANK1/DMPK/IGSF11/STX1B/STX1A/CBLN1/SHANK3/RGS4/TMEM108/NLGN3/SLC8A3/CUX2/TMEM25/NLGN1/ADRB2/S1PR2/SLC8A2 |
| GOBP_REGULATION_OF_CELLULAR_PROTEIN_CATABOLIC_PROCESS | GOBP_REGULATION_OF_CELLULAR_PROTEIN_CATABOLIC_PROCESS | 224 | 0.324988689 | 1.529321564 | 0.000804697 | 0.010670053 | 0.008219326 | 4558 | tags=40%, list=29%, signal=29% | CEBPA/TREM2/NUPR1/PSMD10/PCSK9/AURKA/MAPK9/RNF128/PBK/VPS11/MTM1/ALAD/BAG2/LRRK2/SMAD7/PSME2/FZR1/PSMD14/KEAP1/RGN/RNF185/LAMP3/CCDC22/RFPL1/ATXN3/XPO1/RPS7/HFE/F13B/STUB1/RNF14/RNF144B/DET1/PDCL3/MFSD8/GIPC1/BTRC/PSEN1/EIF3H/FBXO22/RBX1/GABARAPL2/FBXL5/TMTC3/RNF139/SDCBP/CDC20/HSP90AB1/SUMO1/CTSC/TMF1/VPS35/PTEN/PARK7/TAF1/MAGEF1/ANXA2/GLMN/PRKACA/PSMC4/NUB1/SVIP/PSMC3/DDRGK1/PSME1/VCP/WDR91/TTC36/QRICH2/RPL11/FHIT/IL33/GNA12/PTK2B/ATP13A2/FBXW7/UBE2V2/MSN/CAMLG/TLK2/HSP90AA1/CSNK2A2/USP7/CHFR/HERPUD1/RNFT1/SUFU/VGLL4/USP5/RPL23 |
| GOBP_NEGATIVE_REGULATION_OF_RECEPTOR_SIGNALING_PATHWAY_VIA_STAT | GOBP_NEGATIVE_REGULATION_OF_RECEPTOR_SIGNALING_PATHWAY_VIA_STAT | 23 | -0.63167205 | -1.91388444 | 0.000810263 | 0.010721927 | 0.008259285 | 41 | tags=30%, list=0%, signal=30% | PTPRT/CAV1/PTPRD/SOCS3/BCL3/SOCS2/SOCS1 |
| GOBP_NEPHRON_TUBULE_FORMATION | GOBP_NEPHRON_TUBULE_FORMATION | 17 | -0.689846719 | -1.890431477 | 0.000814876 | 0.010761004 | 0.008289386 | 2415 | tags=47%, list=16%, signal=40% | SOX8/NOG/SIX4/GATA3/HES5/IRX2/OSR1/IRX3 |
| GOMF_G_PROTEIN_COUPLED_RECEPTOR_BINDING | GOMF_G_PROTEIN_COUPLED_RECEPTOR_BINDING | 260 | -0.319859391 | -1.520956629 | 0.000818142 | 0.010763484 | 0.008291297 | 2058 | tags=23%, list=13%, signal=20% | WNT7B/AGTR1/CCL11/UCN3/ITGB4/CCL8/NPY/WNT3A/CCL25/AVPR1A/NPFFR2/SLC9A3R1/CXCL5/FEM1A/CX3CL1/FZD7/PDYN/CCL20/GHRH/RSPO1/APLP1/NDP/ADRB1/PYY/CCL3L3/CXCL6/PPY/INSL3/CCL21/DEFB106B/GNA11/PDE4D/PENK/RTP2/PROK1/C10orf99/CCL26/CXCL13/GNAT1/PTCH2/SAA1/ADM/TAC1/CCL3/SAG/HOMER1/CCL7/S1PR2/GNA15/WNT3/ADCYAP1/ASIP/FPR1/EDN3/CALCA/CXCL2/CXCL1/EDN1/PROK2/CCL2 |
| GOBP_LATE_ENDOSOME_TO_VACUOLE_TRANSPORT_VIA_MULTIVESICULAR_BODY_SORTING_PATHWAY | GOBP_LATE_ENDOSOME_TO_VACUOLE_TRANSPORT_VIA_MULTIVESICULAR_BODY_SORTING_PATHWAY | 15 | 0.694929686 | 1.927906874 | 0.000818383 | 0.010763484 | 0.008291297 | 1870 | tags=40%, list=12%, signal=35% | CHMP4A/CHMP5/CHMP6/TMEM50B/VPS25/VTA1 |
| GOBP_POSITIVE_REGULATION_OF_REACTIVE_OXYGEN_SPECIES_METABOLIC_PROCESS | GOBP_POSITIVE_REGULATION_OF_REACTIVE_OXYGEN_SPECIES_METABOLIC_PROCESS | 90 | -0.419662213 | -1.684200241 | 0.000827236 | 0.010857892 | 0.008364021 | 1760 | tags=24%, list=11%, signal=22% | DUOXA1/RAB27A/TICAM1/NFE2L2/FPR2/PDGFB/TGFBR2/TGFB1/LEP/KLF2/CRP/SMAD3/CDKN1A/ICAM1/NOS1AP/IL1B/EDN1/THBS1/KLF4/PTX3/PTGS2/ZC3H12A |
| GOBP_DNA_DEPENDENT_DNA_REPLICATION | GOBP_DNA_DEPENDENT_DNA_REPLICATION | 126 | 0.380341414 | 1.661537571 | 0.000834751 | 0.010934395 | 0.008422953 | 4063 | tags=40%, list=26%, signal=30% | GINS2/MCM5/PCNA/ZRANB3/RFC1/FAM111A/FEN1/POLE2/GMNN/POLD1/MCM6/POLB/MCM2/GEN1/EXD2/DONSON/CDT1/PRIM2/POLG2/RFC3/PRIM1/ETAA1/SMARCAL1/GINS3/CDC34/WDHD1/SLFN11/CHTF8/RFC5/RPA3/SAMHD1/ATRX/POLD2/POLA2/RECQL/CHEK2/GINS1/RFC4/CDC6/ATG7/CHTF18/SENP2/ZNF830/ZMPSTE24/EME1/DSCC1/DDX11/POLD3/SSBP1/MCM4/FANCM |
| GOCC_MYOSIN_FILAMENT | GOCC_MYOSIN_FILAMENT | 21 | -0.644455256 | -1.902635923 | 0.000838443 | 0.010960616 | 0.008443152 | 122 | tags=24%, list=1%, signal=24% | MYH13/MYH11/MYBPH/MYOM1/ACTG2 |
| GOMF_C_ACYLTRANSFERASE_ACTIVITY | GOMF_C_ACYLTRANSFERASE_ACTIVITY | 15 | 0.693466851 | 1.923848607 | 0.000854159 | 0.0111436 | 0.008584107 | 3479 | tags=80%, list=22%, signal=62% | SPTLC3/ACAA1/ACSM2B/ACSM1/ACSM5/SPTLC2/SCP2/ACSM3/SPTLC1/ACAT2/ACAT1/HADHB |
| GOBP_PLATELET_DERIVED_GROWTH_FACTOR_RECEPTOR_SIGNALING_PATHWAY | GOBP_PLATELET_DERIVED_GROWTH_FACTOR_RECEPTOR_SIGNALING_PATHWAY | 53 | -0.484460734 | -1.790275066 | 0.000861907 | 0.011222101 | 0.008644578 | 2612 | tags=38%, list=17%, signal=32% | ADIPOQ/CSPG4/ABL1/RGS14/ZFAND5/PTPN1/PDGFC/SLC9A3R1/PDGFB/BCAR1/PDGFRL/F3/LOX/VEGFA/RAPGEF1/TIPARP/PLAT/NR4A3/ARID5B/APOD |
| GOCC_CHROMOSOME_TELOMERIC_REGION | GOCC_CHROMOSOME_TELOMERIC_REGION | 112 | 0.38653443 | 1.663259533 | 0.000871649 | 0.011326195 | 0.008724763 | 4644 | tags=48%, list=30%, signal=34% | MSH2/MCM5/PCNA/CHEK1/RAD51AP1/FEN1/SMC6/POLD1/MCM6/MCM2/CDC73/THOC3/SSB/CBX1/PPP1CA/NSMCE2/THOC5/PPP1CB/TP53BP1/RAD17/CBX5/XRCC3/POLR2B/NSMCE4A/TOX4/TNKS/LIG4/ATRX/APEX1/PPP1CC/CHEK2/DCLRE1B/SMG6/POT1/XRCC5/ERCC4/ZBTB48/XRCC1/RNF8/ATM/NSMCE1/SETX/MCM4/DPY30/RPA1/RAD50/PTGES3/THOC2/TNKS2/SP100/RECQL4/CBX3/HAT1/MCM3 |
| GOBP_REGIONALIZATION | GOBP_REGIONALIZATION | 299 | -0.303584272 | -1.477989972 | 0.000890365 | 0.011546255 | 0.008894279 | 3211 | tags=28%, list=21%, signal=23% | FOXJ1/FKBP8/EGR2/HELT/HOXD9/LHX1/HOXA10/SKI/HOXC5/FGF8/HOXB9/PTCH1/ARL13B/FOXA2/OTX1/ISL1/SIX3/CELSR2/HOXD10/CDX4/SEMA3C/NKX2-1/ACVR1/DBX1/HEY1/KAT2A/NOG/PCDH8/SMARCD3/FZD5/HOXA3/TCF15/HOXA11/HOXA9/HOXA5/ARC/HOXC9/PLXNA2/HES4/SOX1/WNT7B/HES1/DKK1/GLI3/NRARP/FGF10/SPRY1/DLL3/WNT3A/NKX2-2/LRP2/NKX3-1/HOXD8/SCMH1/PKD1L1/HES2/SEMA3A/SP8/HIPK2/LMX1B/BMP2/NTF4/HES5/LRP5/BTG2/IRX2/SMAD3/HOXB1/ALX4/CHSY1/WT1/GATA4/WNT3/CHRD/FOXC2/SRF/HOXD13/OSR1/MSX1/ACVR2B/IRX3/LRP4/SOX17/EDN1/FOXC1 |
| GOBP_REGULATION_OF_CATION_CHANNEL_ACTIVITY | GOBP_REGULATION_OF_CATION_CHANNEL_ACTIVITY | 158 | -0.360477479 | -1.602716013 | 0.000895201 | 0.011585797 | 0.008924739 | 3926 | tags=36%, list=25%, signal=27% | DLG4/DRD4/DRD2/GRIN1/LRRC52/SLC6A9/KCNG1/JPH1/CACNB1/LRRC55/CRH/STIM1/MMP9/NPPA/IFNG/FKBP1A/NTSR1/MTNR1B/DRD3/PIRT/GRIA2/SHANK1/CACNA2D1/HAP1/CACNG5/REM1/JPH2/ARC/CAV1/CASQ2/CNIH3/SHANK3/KCNC2/KCNS1/PDE4B/NLGN3/NETO2/KCNS2/GSG1L/KCNA1/NLGN1/PDE4D/ANK2/CACNG3/NOS1/EPO/KCNE4/HPCA/ADRB2/CACNG7/HOMER1/NOS1AP/CACNG2/GEM/PPARGC1A/FGF14/CCL2 |
| GOBP_ACUTE_PHASE_RESPONSE | GOBP_ACUTE_PHASE_RESPONSE | 44 | -0.521911526 | -1.848782601 | 0.000897267 | 0.011588822 | 0.008927069 | 2897 | tags=39%, list=19%, signal=32% | TNFSF11/ASS1/MRGPRX1/HAMP/CEBPB/PLSCR1/SERPINA1/REG3G/ITIH4/IL1A/LBP/CRP/EPO/SAA1/IL1B/PTGS2/IL6 |
| GOBP_RESPONSE_TO_COPPER_ION | GOBP_RESPONSE_TO_COPPER_ION | 36 | -0.546321989 | -1.824686884 | 0.000899009 | 0.011588822 | 0.008927069 | 3271 | tags=47%, list=21%, signal=37% | MT1H/LOXL2/MT1G/MT3/MT2A/MT1E/MT1F/MT1X/NFE2L2/CYP1A2/IL1A/SOD3/CYP1A1/ICAM1/MT1M/MT1A/MT1B |
| GOBP_MITOCHONDRIAL_TRANSPORT | GOBP_MITOCHONDRIAL_TRANSPORT | 214 | 0.327664535 | 1.534473989 | 0.000911361 | 0.01172473 | 0.009031762 | 4811 | tags=42%, list=31%, signal=29% | PRKAA2/NOL3/THRSP/SIRT4/PRKAB2/IMMP1L/SLC25A20/C11orf65/TIMM17A/TMEM14A/YWHAZ/VPS11/PPIF/TP63/FIS1/LRRK2/NMT1/DYNLT1/UBL5/TIMM8B/FLVCR1/SAMM50/SLC25A30/BAG4/COX18/TMEM14C/MAPK8/MID1IP1/FBXO7/PSEN2/PMPCB/PSEN1/SLC25A38/LMAN1/SLC25A33/IMMP2L/TIMM13/MRS2/MRPL18/HSPA4/MFF/NPEPPS/SLC25A1/CASP8/RHOT1/CPT1B/SAE1/SREBF2/VPS35/ATF2/AIFM1/SH3GLB1/SLC25A10/BCS1L/HTRA2/SLC25A23/BAK1/SLC25A16/BOK/AGK/TST/PDCD5/SFXN5/ACACA/MIPEP/HAX1/FBXW7/ROMO1/HSP90AA1/BAD/CSNK2A2/YWHAE/SLC25A21/OXA1L/PARL/TMEM14B/TOMM40L/TIMM23/GRPEL2/UCP2/SLC25A22/TOMM22/BNIP3L/SREBF1/PPP3R1/GZMB/SLC25A24/SLC39A8/HSPD1/BID |
| GOBP_POSITIVE_REGULATION_OF_BLOOD_VESSEL_ENDOTHELIAL_CELL_MIGRATION | GOBP_POSITIVE_REGULATION_OF_BLOOD_VESSEL_ENDOTHELIAL_CELL_MIGRATION | 49 | -0.495245921 | -1.787462567 | 0.000915034 | 0.011748678 | 0.009050209 | 3569 | tags=43%, list=23%, signal=33% | HDAC7/SP1/KDR/AKT1/MAP3K3/FGFBP1/SIRT1/ABL1/HMOX1/MAP2K3/NFE2L2/PDGFB/TGFB1/VEGFA/NOS3/VEGFC/ANGPT4/FGFR1/FOXC2/THBS1/PTGS2 |
| GOBP_REGULATION_OF_HORMONE_METABOLIC_PROCESS | GOBP_REGULATION_OF_HORMONE_METABOLIC_PROCESS | 33 | -0.566211013 | -1.858703933 | 0.000925626 | 0.011861184 | 0.009136874 | 1760 | tags=36%, list=11%, signal=32% | DUOXA1/BMP6/FFAR3/BMP2/GATA3/H6PD/STC2/CYP27B1/TCF7L2/ADM/PPARGC1A/EGR1 |
| GOBP_AMINOGLYCAN_METABOLIC_PROCESS | GOBP_AMINOGLYCAN_METABOLIC_PROCESS | 162 | -0.353883477 | -1.582089472 | 0.000929444 | 0.011886621 | 0.009156469 | 2830 | tags=33%, list=18%, signal=27% | SLC35D2/AKT1/LYVE1/PRELP/OGN/B3GAT3/SPOCK3/HAS3/NFKB1/ACAN/DSE/NDST2/CSPG4/B3GALT5/ST3GAL1/B3GNT4/B3GAT1/B3GNT7/SLC9A1/CHST14/CHI3L2/PGLYRP3/B3GALT6/CHPF2/DSEL/ITIH4/PDGFB/HYAL2/CSGALNACT1/B4GALT5/TGFB1/ST3GAL6/GAL3ST3/HS3ST6/HS3ST3B1/CHSY3/UST/NDST1/LYG2/GPC5/CHST6/EGFLAM/CHSY1/VCAN/CHST3/B3GALT1/B4GALT1/HAS2/HAS1/IL1B/PIM1/SDC4/FOXC1 |
| GOBP_REGULATION_OF_ORGAN_GROWTH | GOBP_REGULATION_OF_ORGAN_GROWTH | 84 | -0.422889166 | -1.671052404 | 0.000936053 | 0.011947577 | 0.009203425 | 2861 | tags=32%, list=18%, signal=26% | FGF8/YAP1/HAMP/WWC3/NOG/TBX5/ARX/RGS4/SLC6A4/TGFBR2/PROX1/DUSP9/IGF1/TGFBR3/GATA6/PI16/BCL2L11/GJA1/RAG2/WT1/LATS2/FOXC2/DUSP6/EDN1/PIM1/RGS2/FOXC1 |
| GOBP_NEGATIVE_REGULATION_OF_CHEMOTAXIS | GOBP_NEGATIVE_REGULATION_OF_CHEMOTAXIS | 53 | -0.481994475 | -1.78116126 | 0.000950569 | 0.01209399 | 0.009316209 | 2510 | tags=36%, list=16%, signal=30% | ANGPT2/SEMA6A/SEMA3C/SEMA6C/MMP28/SEMA3D/WNT3A/SEMA4F/SEMA3B/DUSP1/RIN3/SEMA3A/SEMA4A/CXCL13/PLXNA3/WNT3/SEMA4B/THBS1/CCL2 |
| GOBP_MEMBRANE_DEPOLARIZATION_DURING_ACTION_POTENTIAL | GOBP_MEMBRANE_DEPOLARIZATION_DURING_ACTION_POTENTIAL | 35 | -0.563840477 | -1.865934018 | 0.000952414 | 0.01209399 | 0.009316209 | 3398 | tags=49%, list=22%, signal=38% | SCN10A/SCN2A/HCN2/CACNA2D1/CACNA1I/SCN5A/PTPN3/SCN2B/CACNA1G/SCN3B/TRPM4/SCN1A/SCN9A/ATP1A2/ANK2/SCN7A/HCN4 |
| GOBP_REGULATION_OF_STEROID_BIOSYNTHETIC_PROCESS | GOBP_REGULATION_OF_STEROID_BIOSYNTHETIC_PROCESS | 82 | 0.426231051 | 1.730451353 | 0.00095312 | 0.01209399 | 0.009316209 | 954 | tags=20%, list=6%, signal=18% | CYP7A1/GPAM/SQLE/HMGCS1/BMP5/MVK/FDFT1/ELOVL6/STARD4/LSS/IDI1/PMVK/TM7SF2/MVD/SEC14L2/NFYB |
| GOBP_CENTROSOME_DUPLICATION | GOBP_CENTROSOME_DUPLICATION | 59 | 0.482012551 | 1.826817907 | 0.000968462 | 0.012257702 | 0.009442319 | 3493 | tags=49%, list=22%, signal=38% | NDC80/CDK5RAP2/BRCA1/CETN2/PKD2/MDM1/CCNF/SAC3D1/GEN1/CHMP5/SASS6/CHMP2A/CEP152/CEP120/XRCC3/NPM1/USP33/CEP63/CNTROB/CEP192/PLK4/CENPJ/VPS4B/PDCD6IP/WDR62/KAT2B/FBXW5/CHMP1A/ALMS1 |
| GOBP_EPITHELIAL_TUBE_MORPHOGENESIS | GOBP_EPITHELIAL_TUBE_MORPHOGENESIS | 300 | -0.307997423 | -1.497711297 | 0.000970216 | 0.012257702 | 0.009442319 | 2483 | tags=24%, list=16%, signal=20% | NKX2-1/ACVR1/SOX8/KAT2A/ITGAX/NOG/WNK4/PKHD1/HOXA11/MET/RYR2/HOXA5/BRD2/TGFB2/HES1/STARD13/FZD6/CCL11/GLI3/NRARP/FGF10/RBM15/NFATC4/LUZP1/SPRY1/PHACTR4/WNT3A/CSF1/GZF1/CITED1/CXCR4/LRP2/NKX3-1/TGFBR2/PROX1/LAMA1/SIX4/MTHFR/GRHL2/BMP2/TGFB1/FOXP1/VEGFA/GATA3/HES5/HAND1/LRP5/VANGL2/PODXL/IRX2/SMAD3/SALL4/ADAMTS16/SPRY2/WT1/ADM/GATA4/SOX11/TEAD2/RHOB/FOXC2/SRF/OSR1/RASIP1/IRX3/SOX17/TACSTD2/EDN1/SDC4/EPHA2/MYC |
| GOBP_BRANCHING_MORPHOGENESIS_OF_AN_EPITHELIAL_TUBE | GOBP_BRANCHING_MORPHOGENESIS_OF_AN_EPITHELIAL_TUBE | 141 | -0.363428528 | -1.579127234 | 0.00097632 | 0.012257702 | 0.009442319 | 3632 | tags=34%, list=23%, signal=26% | WNT1/SEMA3E/LAMA5/KDR/SIRT6/GBX2/COL4A1/LHX1/TCF21/FGF8/PTCH1/YAP1/ABL1/NKX2-1/ACVR1/SOX8/NOG/PKHD1/HOXA11/MET/HOXA5/CCL11/GLI3/NRARP/FGF10/RBM15/NFATC4/SPRY1/CSF1/GZF1/CITED1/NKX3-1/TGFBR2/LAMA1/SIX4/BMP2/VEGFA/LRP5/ADAMTS16/SPRY2/WT1/FOXC2/SRF/RASIP1/TACSTD2/EDN1/EPHA2/MYC |
| GOBP_CELLULAR_RESPONSE_TO_REACTIVE_OXYGEN_SPECIES | GOBP_CELLULAR_RESPONSE_TO_REACTIVE_OXYGEN_SPECIES | 139 | -0.36405763 | -1.57957833 | 0.00097632 | 0.012257702 | 0.009442319 | 972 | tags=14%, list=6%, signal=14% | KLF2/MMP2/MMP3/SPHK1/SOD3/TNFAIP3/GPR37L1/SIRPA/KDM6B/NOS3/NR4A3/RHOB/IL10/JUN/ERN1/IL18RAP/FOXO1/KLF4/FOS/IL6 |
| GOBP_NEGATIVE_REGULATION_OF_ORGANELLE_ORGANIZATION | GOBP_NEGATIVE_REGULATION_OF_ORGANELLE_ORGANIZATION | 299 | 0.297141934 | 1.438060974 | 0.00097958 | 0.012257702 | 0.009442319 | 3857 | tags=33%, list=25%, signal=25% | FRMD7/NOL3/TOP2A/NDC80/CDK5RAP2/CHMP4A/STMN2/NUPR1/PTTG1/PSMD10/BRCA1/KANK4/SCFD1/MAD2L1/C11orf65/EML2/CHEK1/ZWINT/TMEM14A/TMSB4Y/BUB1/TOM1L1/MDM1/CCNF/MTM1/PPIF/MCM2/EVI5L/PIK3R1/GEN1/LRRK2/IK/AURKB/CDT1/APC/HDAC6/CAPG/USP30/TBC1D7/TMSB4X/KATNB1/FEZ2/TRIAP1/KLHL22/TRIP13/MID1IP1/ESPL1/CLASP2/MAD2L2/KNTC1/XRCC3/DCP2/NPM1/FNIP1/ODF2L/NME6/ANKRD27/TNKS/DYNC1LI1/MNAT1/CGNL1/ARHGEF18/ATRX/TRIM9/CDC20/SWAP70/GMFG/STMN1/DNM1L/BUB3/TMOD3/SMG6/PSMG2/POT1/KAT2B/ERCC4/OMA1/XRCC1/FLCN/LIMA1/LCMT1/TMSB10/HNRNPA1/ATM/TCHP/MKKS/XRN1/STYXL1/BOK/FEZ1/FLII/SPTBN5/BECN1/TWF2/TWF1/CORO1A/ZW10/CEP97 |
| GOBP_NEGATIVE_REGULATION_OF_NEURON_APOPTOTIC_PROCESS | GOBP_NEGATIVE_REGULATION_OF_NEURON_APOPTOTIC_PROCESS | 127 | -0.372707615 | -1.589190518 | 0.000980987 | 0.012257702 | 0.009442319 | 2961 | tags=30%, list=19%, signal=24% | NTF3/MTNR1B/FGF8/SOD2/NTRK1/ISL1/MT3/PTPRZ1/CEBPB/TFAP2D/HMOX1/BARHL1/GABRA5/NFATC4/CITED1/CX3CL1/GABRB2/SIX4/TFAP2B/FOXQ1/HIPK2/NTRK2/NTF4/FAIM2/CPEB4/BTG2/POU4F1/PLA2G3/C5AR1/TYRO3/MAG/IL10/GDF5/PPARGC1A/TGFB3/CLCF1/CCL2/NR4A2 |
| GOBP_CELL_JUNCTION_ASSEMBLY | GOBP_CELL_JUNCTION_ASSEMBLY | 388 | -0.291556738 | -1.448660593 | 0.000982295 | 0.012257702 | 0.009442319 | 2963 | tags=25%, list=19%, signal=21% | CLDN18/OXTR/CHRNB2/MYOC/PCDHB5/THSD1/NTRK1/BSN/COL16A1/ACTB/SHANK1/UGT8/CNTNAP1/SLITRK4/PCDHB2/EPB41L3/ABL1/CTNND2/GHRL/LINGO2/FARP1/JUP/FZD5/SDK1/CLSTN2/CAV1/CBLN1/SLITRK1/SHANK3/NPTN/WDR1/ITGB4/MAP1B/EEF2K/SLC9A1/RAC1/ACTN1/VCL/WNT3A/CDH8/SDK2/PDLIM5/AMIGO3/PCDHB9/EFNB2/GJC1/GABRB2/LRRTM2/PTPRD/NLGN3/RHOD/EPHB1/SIX4/LRRTM1/ESAM/GRHL2/CUX2/CDH12/SORBS1/TPBG/CDH18/NTRK2/LGI2/EFNA5/VEGFA/GJA4/RAPGEF1/IL1RAP/GHSR/NLGN1/CLDN2/SEMA4A/PIP5K1C/GPM6B/FLRT3/SMAD3/POU4F1/SLITRK2/GABRA2/GJA1/LAMC2/CDH10/CDH19/LRFN5/CD9/SRF/TLN2/FLNC/LRP4/IL1B/APOD/SDC4/THBS1/FAM107A/EPHA2/SLITRK3 |
| GOBP_IMPORT_INTO_CELL | GOBP_IMPORT_INTO_CELL | 219 | -0.320395572 | -1.506195454 | 0.000982295 | 0.012257702 | 0.009442319 | 3387 | tags=34%, list=22%, signal=27% | KCNJ9/SLC5A2/AKT1/TFR2/ATP1B1/HCN2/SLC43A1/ATP1A1/IFNG/NTSR1/SLC7A5/SLC43A2/DRD3/SLC39A4/ACTB/CACNA2D1/TRPV3/SLC38A1/KCNJ12/KCNJ1/CACNG5/SLC27A5/SLC12A9/WNK4/TRPV6/SLC6A20/KCNJ14/WNK2/ARC/SLC11A2/ATP1B3/SLC12A2/CNGA3/RGS4/SLC6A4/SLC9A4/SLC29A4/SLC9A1/SLC6A6/SLC5A6/DNM1/TRPM4/ATP4A/SLC30A1/LRP2/SLC27A1/SLC8A3/SLC22A3/KCNJ6/GSG1L/SLC3A2/ATP1B2/SLC6A11/ATP1A2/SLC1A4/GPM6B/SLC24A2/CACNG3/ATP2B4/NOS1/CALY/PER2/HPCA/CACNG7/SLC5A1/SLC22A4/HCN4/CACNG2/SLC7A1/SLC7A2/IRS2/SLC2A3/SLC8A2/RGS2/THBS1 |
| GOBP_POSITIVE_REGULATION_OF_VASCULAR_ENDOTHELIAL_GROWTH_FACTOR_PRODUCTION | GOBP_POSITIVE_REGULATION_OF_VASCULAR_ENDOTHELIAL_GROWTH_FACTOR_PRODUCTION | 27 | -0.587286427 | -1.849947797 | 0.000984785 | 0.012257702 | 0.009442319 | 1516 | tags=33%, list=10%, signal=30% | NOX1/IL1A/SULF1/TGFB1/GATA4/C5AR1/IL1B/PTGS2/IL6 |
| GOBP_REGULATION_OF_PROTEASOMAL_PROTEIN_CATABOLIC_PROCESS | GOBP_REGULATION_OF_PROTEASOMAL_PROTEIN_CATABOLIC_PROCESS | 161 | 0.369057497 | 1.66650006 | 0.000984926 | 0.012257702 | 0.009442319 | 4408 | tags=39%, list=28%, signal=28% | CEBPA/TREM2/NUPR1/PSMD10/AURKA/MAPK9/PBK/MTM1/ALAD/BAG2/LRRK2/SMAD7/PSME2/FZR1/PSMD14/KEAP1/RNF185/LAMP3/RFPL1/ATXN3/XPO1/HFE/STUB1/RNF14/RNF144B/DET1/GIPC1/BTRC/PSEN1/EIF3H/FBXO22/RBX1/GABARAPL2/TMTC3/SDCBP/CDC20/HSP90AB1/SUMO1/TMF1/PARK7/TAF1/GLMN/PRKACA/PSMC4/NUB1/SVIP/PSMC3/DDRGK1/PSME1/VCP/TTC36/RPL11/FHIT/IL33/GNA12/FBXW7/UBE2V2/CAMLG/TLK2/USP7/CHFR/HERPUD1/RNFT1 |
| GOBP_NEGATIVE_REGULATION_OF_WOUND_HEALING | GOBP_NEGATIVE_REGULATION_OF_WOUND_HEALING | 67 | -0.455415701 | -1.747731558 | 0.000991869 | 0.012320463 | 0.009490665 | 800 | tags=18%, list=5%, signal=17% | CEACAM1/SMAD3/PLAT/GJA1/NOS3/CD9/PLAUR/SERPINB2/THBD/EDN1/THBS1/SERPINE1 |
| GOBP_POSITIVE_REGULATION_OF_BLOOD_CIRCULATION | GOBP_POSITIVE_REGULATION_OF_BLOOD_CIRCULATION | 37 | -0.537901902 | -1.814423886 | 0.000999994 | 0.012397631 | 0.009550108 | 3131 | tags=57%, list=20%, signal=45% | NKX2-5/NPPA/ATP1A1/GHRL/ADA/RYR2/GCH1/ADRA1D/TGFB2/RGS4/SCN3B/TRPM4/AVPR1A/ADRB1/ATP1A2/PDE4D/ADM/PTGER2/EDN3/EDN1/RGS2 |
| GOBP_APOPTOTIC_PROCESS_INVOLVED_IN_MORPHOGENESIS | GOBP_APOPTOTIC_PROCESS_INVOLVED_IN_MORPHOGENESIS | 22 | -0.640276842 | -1.907286107 | 0.00100604 | 0.012448779 | 0.009589509 | 2674 | tags=50%, list=17%, signal=41% | FGF4/FZD5/TGFB2/TNFRSF1B/PPP2R1B/LRP5/CRYAB/BCL2L11/FOXC2/TNFRSF1A/FOXC1 |
| GOBP_SISTER_CHROMATID_COHESION | GOBP_SISTER_CHROMATID_COHESION | 40 | 0.511794517 | 1.750542614 | 0.001015455 | 0.012541349 | 0.009660817 | 4469 | tags=65%, list=29%, signal=46% | HDAC8/KIF22/STAG3/AXIN2/BUB1/FEN1/ESCO2/RAD51C/STAG1/NSMCE2/ESPL1/PHB2/CTCF/CHTF8/TNKS/RB1/ATRX/ESCO1/CDC20/STAG2/CTNNB1/DSCC1/DDX11/FBXW7/CDCA5/PDS5B |
| GOBP_LEARNING | GOBP_LEARNING | 121 | -0.384115537 | -1.631793157 | 0.00102169 | 0.012594227 | 0.00970155 | 3926 | tags=38%, list=25%, signal=29% | DLG4/NPAS4/MAP1A/TLR2/DRD2/YTHDF1/NRXN3/GRIN1/CCK/MEIS2/LRRN4/NRXN1/CRH/CHRNB2/NTSR1/INSR/DRD3/SHANK1/TANC1/ARC/TH/RGS14/SHANK3/NPTN/GABRA5/KALRN/DBH/DRD5/ADCY3/NLGN3/SLC8A3/TPBG/NTRK2/BRSK1/ATP1A2/GPR88/BTG2/SLC24A2/NPTX2/TAC1/SRF/JUN/TNR/SLC8A2/FOSL1/FOS |
| GOCC_CALCIUM_CHANNEL_COMPLEX | GOCC_CALCIUM_CHANNEL_COMPLEX | 57 | -0.46587631 | -1.745041566 | 0.001023621 | 0.012594227 | 0.00970155 | 3198 | tags=39%, list=21%, signal=31% | CACNA1A/CACNA1E/FKBP1A/CACNA2D1/CACNA1I/CACNG1/TRPV6/RYR2/CASQ2/CACNA1G/CACNG6/PDE4B/PKD1L1/HSPA2/PDE4D/ATP2A1/CACNG3/NOS1/ORAI1/CACNG7/NOS1AP/CACNG2 |
| GOBP_REGULATION_OF_SISTER_CHROMATID_COHESION | GOBP_REGULATION_OF_SISTER_CHROMATID_COHESION | 17 | 0.657292082 | 1.870945801 | 0.001033926 | 0.012696923 | 0.009780659 | 2567 | tags=59%, list=17%, signal=49% | HDAC8/AXIN2/BUB1/FEN1/NSMCE2/ESPL1/CTCF/TNKS/RB1/ATRX |
| GOCC_RESPIRATORY_CHAIN_COMPLEX | GOCC_RESPIRATORY_CHAIN_COMPLEX | 67 | 0.450059528 | 1.736063671 | 0.001059298 | 0.012983914 | 0.010001732 | 6330 | tags=73%, list=41%, signal=44% | NDUFAF1/NDUFA5/NDUFS4/NDUFA6/NDUFB2/NDUFB1/NDUFB4/NDUFA10/NDUFA9/NDUFB6/UQCRB/UQCRQ/NDUFV1/UQCRC2/SDHA/BCS1L/FOXRED1/NDUFA11/NDUFB10/COX6B1/NDUFC1/NDUFAB1/NDUFB3/NDUFA12/COX6A1/UQCRC1/SDHD/NDUFB5/NDUFS2/SDHC/NDUFA1/NDUFS5/COX4I1/NDUFS8/NDUFS7/NDUFB11/NDUFA8/NDUFA2/NDUFV2/NDUFA7/NDUFC2/NDUFB7/NDUFA3/C15orf48/NDUFB8/NDUFS6/COX6A2/UQCRFS1/NDUFS1 |
| GOBP_MICROTUBULE_CYTOSKELETON_ORGANIZATION | GOBP_MICROTUBULE_CYTOSKELETON_ORGANIZATION | 473 | 0.26932895 | 1.375540345 | 0.0010693 | 0.013051445 | 0.010053753 | 4117 | tags=33%, list=26%, signal=25% | NINL/PRKAA2/ASPM/NUSAP1/CNTLN/NDC80/FIGNL1/CDK5RAP2/GNAI1/UBXN2B/STMN2/PARD6B/BRCA1/TUBG2/CETN2/MAD2L1/CDK5/EML2/SPAST/CHEK1/AURKA/CETN3/GAS2/BBS4/TUBG1/SKA2/RACGAP1/RCC1/TUBE1/CCDC66/PKD2/BBS2/MDM1/CCNF/SAC3D1/KATNAL1/GEN1/FIGN/DYNLT1/GOLGA2/CHMP5/AURKB/SPATA7/DLG1/SASS6/SDCCAG8/GADD45A/CEP250/CCNB2/APC/ATXN3/HDAC6/KIFC1/STAG1/KIF3A/CHMP2A/NEK2/CEP152/TACC3/KATNB1/CEP120/BRSK2/MID1IP1/ESPL1/SSX2IP/CLASP2/UVRAG/CEP70/XRCC3/PRC1/RANBP9/NPM1/PPP1R12A/BCAS3/NUF2/SPIRE1/CENPH/USP33/NEK7/MLH1/CEP63/KIF3B/ROCK1/PEX14/CNTROB/PAK1/KIF11/TNKS/CEP192/DYNC1LI1/NIN/SPAG16/CLTC/SRGAP2/PARD6A/ATRX/KIF20A/LLGL1/IFT172/PLK4/DYNC1H1/MAPRE2/CHEK2/MAP7D1/CDC20/CENPJ/DLGAP5/STMN1/MEIG1/VPS4B/TUBB2A/TUBGCP3/STAG2/OCLN/PDCD6IP/TTC12/WDR62/CCDC88A/DIXDC1/NCKAP5/KAT2B/VAMP4/INCENP/PRKCZ/FBXW5/CHMP1A/PAFAH1B1/ALMS1/VCP/CTNNB1/CENPE/DRG1/CYLD/MCPH1/CUL7/UXT/TRAF3IP1/IQCG/ZW10/DCTN6/CEP97/TRPV4/BCCIP/STMN3/XRCC2/NSFL1C/LRRC6/ARL2/CHMP2B/LZTS2/KIF2A/RANGRF/RPS3/KIF2C/SKA1 |
| GOBP_BLOOD_VESSEL_ENDOTHELIAL_CELL_MIGRATION | GOBP_BLOOD_VESSEL_ENDOTHELIAL_CELL_MIGRATION | 109 | -0.396328195 | -1.652376019 | 0.001070524 | 0.013051445 | 0.010053753 | 2628 | tags=26%, list=17%, signal=21% | SIRT1/ABL1/ANGPT2/JUP/SPRED1/ID1/HMOX1/STARD13/TBXA2R/MAP2K3/NFE2L2/EFNB2/PDGFB/TGFB1/VEGFA/ATP2B4/NOS3/VEGFC/ANGPT4/FGFR1/FOXC2/SRF/EGR3/THBS1/KLF4/PTGS2/NR4A1/EPHA2 |
| GOBP_PROTEIN_DNA_COMPLEX_SUBUNIT_ORGANIZATION | GOBP_PROTEIN_DNA_COMPLEX_SUBUNIT_ORGANIZATION | 184 | 0.342262702 | 1.570237651 | 0.001071473 | 0.013051445 | 0.010053753 | 4379 | tags=43%, list=28%, signal=31% | MCM5/ITGB3BP/ASF1A/XPA/CETN2/BRF2/CENPQ/TAF12/ATF7IP/CHAF1A/GMNN/RRN3/GTF2E1/MCM6/MCM2/CENPK/ANP32E/GTF2H5/ACTR6/UBTF/RAD51C/MIS12/CDT1/DAXX/OIP5/HELLS/RBBP4/GTF2H3/CAND1/CTCF/DDB2/NPM1/RBX1/CENPH/CHAF1B/HJURP/RBBP7/ESR1/NAP1L3/RPA3/SART3/NAP1L1/MNAT1/RB1/CENPM/ATRX/SMARCD2/PSMC6/DLGAP5/TAF1/CENPL/LIN54/RAD52/PSMC4/ZNHIT1/HMGB2/RUVBL1/CENPN/PSMC3/ASF1B/RNF8/SMYD3/CENPE/NAP1L4/TAF11/PIH1D1/RSF1/GTF2A2/CHD1L/RPS27A/MCM4/ERCC3/CENPI/PSMC5/RPA1/DMAP1/HP1BP3/SENP6/NAP1L5 |
| GOBP_RESPONSE_TO_METAL_ION | GOBP_RESPONSE_TO_METAL_ION | 334 | -0.300606714 | -1.476681147 | 0.001072859 | 0.013051445 | 0.010053753 | 3343 | tags=30%, list=21%, signal=24% | AKT1/FGG/TFR2/LCE1D/MT1H/GPHN/LOXL2/STIM1/SMPD1/MMP9/CPNE2/SYT4/FXN/FGA/EGFR/JUND/MT1G/ATF4/ASS1/SOD2/CYP11B1/MT3/HAMP/ITPKB/BRAF/SLC30A3/SCN5A/MT2A/KCNMB4/MAPT/CD14/TFAP2A/TRPV6/RYR2/KCNMB1/CAV1/SYT15/CASQ2/CPNE8/SLC11A2/APOBEC1/AQP3/TH/HMOX1/HAAO/TFF1/SLC12A2/CACNA1G/CNGA3/MT1E/PLSCR1/SLC25A12/NFATC4/EEF2K/KCNC2/MT1F/BMP6/SLC30A1/RASA4/MT1X/ANXA11/NFE2L2/AMELX/GLRA1/DUSP1/TPH2/CYP1A2/ACER1/GLRA2/SLC30A8/IL1A/CPNE6/NPC1/KCNA1/GOT1/CRIP1/SOD3/SYT12/NLGN1/CYP1A1/PENK/TRPC1/ALOX5AP/S100A8/HPCA/HOMER1/ICAM1/CACNG2/JUN/MT1M/PPARGC1A/EDN1/MT1A/THBS1/MT1B/IGFBP2/JUNB/FOS/FOSB |
| GOBP_CYTOSKELETON_DEPENDENT_CYTOKINESIS | GOBP_CYTOSKELETON_DEPENDENT_CYTOKINESIS | 76 | 0.42200048 | 1.676455578 | 0.001081316 | 0.013105142 | 0.010095116 | 3362 | tags=41%, list=22%, signal=32% | CKAP2/NUSAP1/CHMP4A/KLHDC8B/SPAST/BBS4/RACGAP1/ANLN/CHMP5/AURKB/CHMP6/APC/CHMP2A/ECT2/UNC119/ESPL1/SPIRE1/RASA1/ACTR2/ROCK1/CNTROB/KIF20A/TTC19/MITD1/STMN1/VPS4B/PDCD6IP/ALKBH4/INCENP/CHMP1A/STAMBP |
| GOBP_NEGATIVE_REGULATION_OF_DEVELOPMENTAL_GROWTH | GOBP_NEGATIVE_REGULATION_OF_DEVELOPMENTAL_GROWTH | 98 | -0.416539825 | -1.702717725 | 0.001081316 | 0.013105142 | 0.010095116 | 2691 | tags=37%, list=17%, signal=31% | OSTN/RAI1/MT3/WWC3/MSTN/SEMA6A/SEMA3C/SEMA6C/NOG/MAP2/TBX5/TRIM46/RGS4/KIAA0319/SLC6A4/SEMA3D/WNT3A/SEMA4F/SEMA3B/TGFBR2/SEMA3A/ADRB1/DUSP10/DCC/PI16/SEMA4A/GJA1/CDKN1A/PLXNA3/ADRB2/MAG/WNT3/SEMA4B/TNR/RGS2/SOCS2 |
| GOBP_REGULATION_OF_HEMOPOIESIS | GOBP_REGULATION_OF_HEMOPOIESIS | 344 | -0.295603044 | -1.454397915 | 0.001089361 | 0.01317802 | 0.010151255 | 1039 | tags=27%, list=7%, signal=26% | CD80/IRF7/MEIS2/TNFRSF18/CBFB/HSPA1B/ZFP36L1/IFNB1/IL2RA/FOXJ1/AGER/RIPK2/ZBTB46/IFNA2/IL17D/IL4/P4HTM/CLDN18/TMEM176A/IFNG/PCK1/TNFSF11/BRD1/ACVR1B/ADIPOQ/ABL1/SIN3A/CEBPB/ITPKB/NFKBIA/CARTPT/KAT2A/TNFSF9/HOXA9/ADA/HOXA5/ZMIZ1/GLI3/NRARP/IL23R/TOX/RBM15/CTLA4/SETD1A/STAT3/CSF1/IRF4/PRDM1/PGLYRP3/PRKCQ/TGFBR2/NFATC2/FOXO3/JAG1/LILRB2/TGFB1/POU4F2/LOX/DUSP10/FOXP1/GATA3/LILRB3/CEACAM1/SPINK5/KLF10/IRF1/JAK3/ZFP36L2/TRIB1/POU4F1/THPO/CSF3/GFI1B/CSF3R/PLA2G3/MYL9/IL20/CCL3/DTX1/NR4A3/EGR3/IL10/JUN/NFKBIZ/LIF/THBS1/NFE2/BCL6/IL4R/ZFP36/SOCS1/MYC/ZC3H12A/FOS |
| GOBP_AEROBIC_RESPIRATION | GOBP_AEROBIC_RESPIRATION | 73 | 0.44798049 | 1.765435286 | 0.001094556 | 0.013216207 | 0.010180671 | 5329 | tags=53%, list=34%, signal=35% | COX15/FAHD1/IDH1/DLD/IDE/SUCLG2/MTFR1/SUCLA2/COX7A2L/ACO2/MDH1/PDHA1/UQCRB/PANK2/UQCRC2/SURF1/COX6C/PDHB/SDHA/NNT/SUCLG1/VCP/COX6B1/CAT/ME2/IDH2/COX6A1/UQCRC1/SDHD/OXA1L/SDHC/COX4I1/IDH3B/NDUFS8/DHTKD1/NDUFS7/COX5B/SIRT3/CBFA2T3 |
| GOMF_TRANSMITTER_GATED_CHANNEL_ACTIVITY | GOMF_TRANSMITTER_GATED_CHANNEL_ACTIVITY | 59 | -0.472022369 | -1.769651732 | 0.001098353 | 0.0132374 | 0.010196997 | 4476 | tags=63%, list=29%, signal=45% | GABRA6/GABRA1/GRIN3A/GRIK1/GRIN2C/CHRNA5/CHRNG/GRIN1/HTR3D/CHRNB4/HTR3E/GABRR2/CHRNA7/GABRG3/CHRNB2/CHRNA9/GRIN2D/CHRNA3/GRIA2/GLRA3/HTR3A/CHRNA4/GRIK4/CHRNA6/GABRA5/GRIK3/HTR3B/GLRA1/GRIK5/GABRB2/GRID1/GLRA2/GABRR1/GABRA2/CHRNA10/GABRB1/HTR3C |
| GOBP_RESPIRATORY_ELECTRON_TRANSPORT_CHAIN | GOBP_RESPIRATORY_ELECTRON_TRANSPORT_CHAIN | 94 | 0.409046571 | 1.705969681 | 0.001112103 | 0.013378247 | 0.010305494 | 5623 | tags=61%, list=36%, signal=39% | GPD1/COX15/NDUFAF1/NDUFA5/NDUFS4/NDUFA6/DLD/NDUFB2/POLG2/NDUFB1/AIFM2/NDUFB4/NDUFA10/COX7A2L/NDUFA9/NDUFB6/UQCRB/UQCRQ/IMMP2L/NDUFV1/UQCRC2/ETFA/COX6C/PARK7/SDHA/NDUFA11/NDUFB10/DGUOK/COX6B1/NDUFC1/ISCU/NDUFAB1/NDUFB3/NDUFA12/ETFB/COX6A1/UQCRC1/SDHD/NDUFB5/NDUFS2/SLC25A22/SDHC/NDUFA1/NDUFS5/COX4I1/BID/NDUFS8/NDUFS7/COX5B/NDUFB11/PINK1/NDUFA8/NDUFA2/NDUFV2/NDUFA7/NDUFC2/NDUFB7 |
| GOBP_NEGATIVE_REGULATION_OF_CELL_ACTIVATION | GOBP_NEGATIVE_REGULATION_OF_CELL_ACTIVATION | 181 | -0.341991387 | -1.55654545 | 0.001137192 | 0.013654726 | 0.010518471 | 800 | tags=13%, list=5%, signal=12% | CEACAM1/IRF1/TNFAIP3/JAK3/CD274/NOS3/LRFN5/TYRO3/DTX1/SOX11/CD9/ARG2/SCGB1A1/LDLR/IL10/PELI1/THBD/NR1D1/SDC4/BCL6/IL4R/SOCS1/ZC3H12A |
| GOBP_VESICLE_DOCKING | GOBP_VESICLE_DOCKING | 63 | 0.459265256 | 1.755203503 | 0.001143684 | 0.013682444 | 0.010539822 | 3957 | tags=48%, list=25%, signal=36% | VPS45/SCFD1/STX17/RAB8A/STX8/VPS11/CFTR/VTI1B/STX7/EXOC4/SCFD2/NSF/STXBP3/KCNB1/VAMP3/STX2/RAB3A/STX10/EXOC6/RAB10/STX4/CAV2/RAB12/STX16/UNC13B/VPS33A/STX19/STX5/USO1/YKT6 |
| GOBP_EMBRYONIC_ORGAN_MORPHOGENESIS | GOBP_EMBRYONIC_ORGAN_MORPHOGENESIS | 262 | -0.313566448 | -1.491058341 | 0.001143721 | 0.013682444 | 0.010539822 | 3131 | tags=28%, list=20%, signal=23% | NKX2-5/GJB6/HOXD9/LHX1/ALX1/TCF21/CHRNA9/FOXI1/FGF8/HOXB9/OTX1/YAP1/ATP8A2/SIX3/FBN2/HOXD10/ACVR1/NOG/TFAP2A/FZD5/HOXA3/HOXA11/HOXA9/RYR2/HOXA5/HOXC9/TH/HES1/FZD6/GLI3/FGF10/USH1G/MYO3B/PHACTR4/MYO3A/PDZD7/WNT3A/ATOH1/SLC9A3R1/PAX5/SLC44A4/TGFBR2/PROX1/ATP6V1B1/SIX4/GRHL2/HMX2/PRRX1/HIPK2/GATA3/HAND1/STRC/VANGL2/NDST1/SMAD3/CHRNA10/ALDH1A3/HOXB1/SPRY2/ALX4/GATA4/LHFPL5/SOX11/TEAD2/FOXC2/SRF/OSR1/LRIG1/MSX1/POU4F3/SOX17/EDN1/TGFB3/EPHA2 |
| GOBP_EAR_DEVELOPMENT | GOBP_EAR_DEVELOPMENT | 183 | -0.351058166 | -1.600746454 | 0.001148233 | 0.013686778 | 0.010543161 | 2086 | tags=26%, list=13%, signal=23% | TGFB2/LRP10/OTOL1/HES1/FZD6/GABRA5/GLI3/FGF10/USH1G/MYO3B/MYO3A/PDZD7/WNT3A/ATOH1/SLC9A3R1/SLC44A4/CYTL1/GABRB2/PROX1/CDH23/ATP6V1B1/SLC4A7/SIX4/ECE1/HMX2/PRRX1/TSKU/BMP2/JAG1/MAPKAPK2/GATA3/HES5/STRC/BCL2L11/PHOX2B/CHRNA10/ALDH1A3/SPRY2/HOXA13/HPCA/LHFPL5/OSR1/LRIG1/MSX1/POU4F3/EDN1/SDC4/TGFB3 |
| GOMF_CYSTEINE_TYPE_PEPTIDASE_ACTIVITY | GOMF_CYSTEINE_TYPE_PEPTIDASE_ACTIVITY | 131 | 0.364334458 | 1.597803107 | 0.001148305 | 0.013686778 | 0.010543161 | 4693 | tags=48%, list=30%, signal=34% | CASP1/USP9Y/USP18/SCRN2/CAPN12/SCRN3/COPS4/CASP6/USP40/SENP8/PIGK/ATG4C/USP47/USP28/CASP3/ATXN3/USP30/CTSZ/COPS5/PDIA3/ATG4A/CASP10/COPS2/ESPL1/EIF3F/USP48/USP33/USP45/USP21/CASP7/CASP8/CTSO/GGH/CTSC/USP51/UFSP2/CLC/UCHL3/USP46/OTUD7B/SENP2/USP15/CTSK/CAPN1/CYLD/USP3/ALG13/SENP3/OTUB2/CTSF/USPL1/PYCARD/USP1/SENP7/OTUD6B/USP7/SENP6/PGPEP1/OTUD6A/USP5/CAPN7/CTSS/GPAA1 |
| GOBP_ORGANELLE_FUSION | GOBP_ORGANELLE_FUSION | 125 | 0.383908039 | 1.671864082 | 0.00115525 | 0.013744296 | 0.010587468 | 4042 | tags=45%, list=26%, signal=33% | ENO3/VPS8/GOSR1/VPS41/SAMD9/STX17/RAB8A/PLD6/STX8/VPS11/VTI1B/FIS1/PIP4K2B/STX7/SNAP47/BET1/SNAPIN/VAMP8/VAMP3/USP30/SYT7/MFN1/GOSR2/VAV3/TAP2/UVRAG/VPS39/CHCHD3/STX2/RAB3A/VAMP1/SYT9/ANKRD27/STX10/MFF/TAPBP/TRIM9/SNAP23/STX4/TMEM175/CAV2/DNM1L/CALR/ANXA2/THG1L/VAMP4/STX16/OMA1/BAK1/STX19/STX5/USO1/CORO1A/ATP13A2/EEA1/CHMP2B |
| GOBP_RESPONSE_TO_ORGANOPHOSPHORUS | GOBP_RESPONSE_TO_ORGANOPHOSPHORUS | 126 | -0.378043493 | -1.615740781 | 0.001159705 | 0.013772028 | 0.01060883 | 3134 | tags=30%, list=20%, signal=24% | HCN2/DUOX1/WNT10B/PCK1/ASS1/PTPRN/TYR/ADIPOQ/AGXT/RELA/P2RY1/P2RY4/SRD5A1/CNGA3/SLC6A4/DNTT/EEF2K/CIB2/TRPM4/CITED1/PANX1/DUSP1/LDHA/SLC8A3/PDE3A/RAPGEF1/PENK/WT1/MMP19/HCN4/P2RX1/JUN/STC1/LPAR1/THBD/FOSL1/FOS/FOSB |
| GOBP_MUCOPOLYSACCHARIDE_METABOLIC_PROCESS | GOBP_MUCOPOLYSACCHARIDE_METABOLIC_PROCESS | 107 | -0.393709291 | -1.630733034 | 0.001171372 | 0.013885148 | 0.010695969 | 3366 | tags=37%, list=22%, signal=29% | SLC35D2/AKT1/LYVE1/PRELP/OGN/SPOCK3/HAS3/NFKB1/ACAN/DSE/NDST2/CSPG4/ST3GAL1/B3GNT4/B3GNT7/SLC9A1/CHST14/B3GALT6/CHPF2/DSEL/ITIH4/PDGFB/HYAL2/CSGALNACT1/B4GALT5/TGFB1/ST3GAL6/CHSY3/UST/NDST1/CHST6/EGFLAM/CHSY1/VCAN/CHST3/B4GALT1/HAS2/HAS1/IL1B/PIM1 |
| GOCC_AZUROPHIL_GRANULE_LUMEN | GOCC_AZUROPHIL_GRANULE_LUMEN | 81 | 0.43106482 | 1.747399636 | 0.001177466 | 0.013921695 | 0.010724122 | 3064 | tags=33%, list=20%, signal=27% | FABP5/FRK/DSN1/CTSG/PLAC8/CPPED1/AGA/GM2A/GLB1/TXNDC5/PSMD1/PYGB/ACTR10/NHLRC3/FUCA1/PTGES2/ACTR2/DNAJC3/GLA/SDCBP/DYNC1H1/GGH/DPP7/CTSC/TOLLIP/ANXA2/HEXB |
| GOBP_REGULATION_OF_INSULIN_LIKE_GROWTH_FACTOR_RECEPTOR_SIGNALING_PATHWAY | GOBP_REGULATION_OF_INSULIN_LIKE_GROWTH_FACTOR_RECEPTOR_SIGNALING_PATHWAY | 21 | -0.634788367 | -1.874096206 | 0.001178749 | 0.013921695 | 0.010724122 | 1956 | tags=43%, list=13%, signal=38% | IGFBP4/NKX3-1/GHRH/BMP2/IGF1/GHSR/IGFBP6/IGFBP2/IGFBP1 |
| GOBP_ALDITOL_PHOSPHATE_METABOLIC_PROCESS | GOBP_ALDITOL_PHOSPHATE_METABOLIC_PROCESS | 10 | 0.75729454 | 1.867707301 | 0.001200149 | 0.014148662 | 0.010898958 | 457 | tags=30%, list=3%, signal=29% | GPAM/GPD1/ACP6 |
| GOBP_AXON_EXTENSION | GOBP_AXON_EXTENSION | 112 | -0.379510702 | -1.592798428 | 0.001208265 | 0.014218493 | 0.01095275 | 2884 | tags=33%, list=19%, signal=27% | NDEL1/DCLK1/ULK1/ABL1/MT3/SIN3A/SEMA6A/SEMA3C/SEMA6C/MAPT/MAP2/TRIM46/DBN1/ZFYVE27/KIAA0319/SEMA3D/MAP1B/VCL/WNT3A/SLIT3/SEMA4F/ISLR2/SEMA3B/NLGN3/SEMA3A/POU4F2/VEGFA/C9orf72/SEMA4A/PLXNA3/MAG/WNT3/SEMA4B/SRF/CDH4/POU4F3/TNR |
| GOCC_LATE_ENDOSOME | GOCC_LATE_ENDOSOME | 228 | 0.315411188 | 1.483534461 | 0.001220544 | 0.01433697 | 0.011044015 | 3666 | tags=33%, list=24%, signal=26% | CHMP4A/TTPA/BST2/MREG/VPS41/PCSK9/TMEM9/VPS37D/RNF128/HLA-DRB3/STX8/VPS11/MTM1/LRAT/VTI1B/MR1/DERL2/ABCA5/LRRK2/NBR1/STX7/CHMP5/FYCO1/VAMP5/HLA-DMA/LAMP3/TMEM192/HLA-DMB/ANKRD13A/CHMP6/HDAC6/VAMP8/CHMP2A/ANXA6/WDR48/SLC9A9/GOSR2/SNX14/APOA5/LAMP2/MYO5A/LAPTM4A/VTA1/UVRAG/PLD1/VPS39/CD63/FIG4/SLC31A1/MON1A/SLC31A2/CHID1/ANKRD27/MAPK3/M6PR/PLD3/CTNS/MITD1/CLCN4/LAMP1/VPS35/VPS4B/ANXA2/CLCN3/CHMP1A/YIPF2/STARD3NL/SPPL2A/SLC30A4/VPS33A/WDR91/SLC38A9/TMEM106B/VPS29/MAP1LC3A |
| GOBP_POSITIVE_REGULATION_OF_CELL_DEVELOPMENT | GOBP_POSITIVE_REGULATION_OF_CELL_DEVELOPMENT | 267 | -0.311180144 | -1.484372267 | 0.001223011 | 0.014339966 | 0.011046323 | 3073 | tags=26%, list=20%, signal=21% | L1CAM/FGA/ETV5/IFNG/MYOC/TNFSF11/NDEL1/ASPA/ZNF335/ADIPOQ/ABL1/PTPRZ1/RELA/HAP1/MAPT/SOX8/SMARCD3/HOXA11/PLXNA2/DBN1/RGS14/SLITRK1/SHANK3/HES1/NPTN/GLI3/ZFYVE27/MAP1B/EEF2K/KALRN/ZNF365/RAC1/WNT3A/ISLR2/CX3CL1/TTBK1/TNFRSF1B/ARHGDIA/CXCR4/NKX2-2/LRP2/PTPRD/DCT/PDE3A/CUX2/BMP2/TGFB1/POU4F2/NTRK2/VEGFA/OTP/TRIB1/NEDD9/RND2/PLXNA3/MYADM/VEGFC/SOX11/MAG/S1PR2/WNT3/CASS4/SRF/CDH4/HAS2/IL1B/LIF/CLCF1/IL6 |
| GOBP_RESPONSE_TO_CHEMOKINE | GOBP_RESPONSE_TO_CHEMOKINE | 85 | -0.408380816 | -1.624022476 | 0.001235612 | 0.014461572 | 0.011139998 | 2076 | tags=32%, list=13%, signal=28% | SLC12A2/CCL11/RBM15/CCL8/SLIT3/CCL25/CXCL5/CX3CL1/CXCR4/DUSP1/CCL20/CCR7/CCL3L3/LOX/CXCL6/CCL21/CCL26/THPO/CXCL13/CCL3/CCL7/CXCL2/CXCL1/EDN1/FOXC1/CCL2/ZC3H12A |
| GOCC_CONDENSED_CHROMOSOME_CENTROMERIC_REGION | GOCC_CONDENSED_CHROMOSOME_CENTROMERIC_REGION | 89 | 0.421245764 | 1.751098697 | 0.001238213 | 0.014465895 | 0.011143328 | 3511 | tags=46%, list=23%, signal=36% | NDC80/DSN1/ITGB3BP/MAD2L1/ZWINT/SS18L1/SKA2/NUDCD2/BUB1/CENPK/ZWILCH/AURKB/NCAPD2/MIS12/CDT1/NCAPG/DYNLT3/NUP43/NEK2/CFDP1/DCTN5/TP53BP1/NUP37/CLASP2/SPC24/KNTC1/NUF2/CENPH/HJURP/PHF6/DYNC1LI1/NUP85/CENPM/ATRX/PPP1CC/BUB3/CENPN/INCENP/NSL1/NCAPD3/CENPE |
| GOBP_NEURONAL_ACTION_POTENTIAL | GOBP_NEURONAL_ACTION_POTENTIAL | 32 | -0.553313547 | -1.802584175 | 0.001240589 | 0.014467593 | 0.011144636 | 5182 | tags=62%, list=33%, signal=42% | GPR35/KCNMB3/GRIK2/CHRNA1/KCND2/SCN3A/KCNA2/SCN10A/SCN2A/MTNR1B/CACNA1I/SCN5A/KCNMB4/CACNA1G/SCN1A/KCNA1/SCN9A/GPR88/SCN7A/P2RX1 |
| GOBP_POSITIVE_REGULATION_OF_HORMONE_METABOLIC_PROCESS | GOBP_POSITIVE_REGULATION_OF_HORMONE_METABOLIC_PROCESS | 12 | -0.742946028 | -1.838369233 | 0.001252719 | 0.01455669 | 0.011213269 | 2431 | tags=50%, list=16%, signal=42% | SLCO1C1/BMP6/GATA3/ADM/PPARGC1A/EGR1 |
| GOMF_GLUCOCORTICOID_RECEPTOR_BINDING | GOMF_GLUCOCORTICOID_RECEPTOR_BINDING | 12 | -0.742959977 | -1.838403748 | 0.001252719 | 0.01455669 | 0.011213269 | 1445 | tags=83%, list=9%, signal=76% | NCOR2/STAT5B/GRIP1/CEBPB/TACC1/FLT3/SMAD3/NR4A3/NR4A2/NR4A1 |
| GOBP_SYNAPSE_ASSEMBLY | GOBP_SYNAPSE_ASSEMBLY | 155 | -0.359510442 | -1.593934494 | 0.001256764 | 0.014577559 | 0.011229345 | 4385 | tags=45%, list=28%, signal=32% | PCDHB4/GABRA1/PLXND1/SPTBN2/BDNF/SHANK2/CBLN4/PCDHB10/SLITRK5/LRRN1/NPAS4/TLR2/DRD2/AMIGO2/GJA10/PCDHB11/PTPRS/GAP43/NRXN1/SLIT1/CNTN5/OXTR/CHRNB2/PCDHB5/NTRK1/BSN/SHANK1/SLITRK4/PCDHB2/GHRL/LINGO2/FARP1/FZD5/SDK1/CLSTN2/CBLN1/SLITRK1/SHANK3/NPTN/MAP1B/EEF2K/WNT3A/SDK2/PDLIM5/AMIGO3/PCDHB9/EFNB2/GABRB2/LRRTM2/PTPRD/NLGN3/EPHB1/SIX4/LRRTM1/CUX2/TPBG/NTRK2/LGI2/IL1RAP/GHSR/NLGN1/SEMA4A/FLRT3/POU4F1/SLITRK2/GABRA2/LRFN5/LRP4/SLITRK3 |
| GOBP_REGULATION_OF_BODY_FLUID_LEVELS | GOBP_REGULATION_OF_BODY_FLUID_LEVELS | 457 | -0.27476538 | -1.392557588 | 0.001263035 | 0.014624136 | 0.011265224 | 2827 | tags=22%, list=18%, signal=19% | OXTR/CSN3/PRL/STATH/FOXA2/ZNF385A/PHF21A/C1QTNF1/CD34/ACTB/NCOA1/AGR2/DGKG/WAS/CELSR2/IFNA21/GP6/UMPS/P2RY1/FLG/WNK4/SH2B2/MET/A2M/ADA/SLC4A1/VIP/CAV1/AQP3/ADCY4/FZD6/PLSCR1/FGF10/SERPINA1/KALRN/IFNA14/RAC1/MLLT6/VCL/WNT3A/DGKE/TBXA2R/RAB27A/IFNA8/NFE2L2/ADCY5/PEAR1/ADCY3/PRKCQ/GRHL1/PDGFB/KRT16/ATP6V1B1/TFAP2B/CHRM1/HYAL2/CYP4A11/PDPN/F3/SCNN1A/FA2H/PRTN3/DHODH/VEGFA/GATA3/CEACAM1/IRF1/FBLN1/GNA11/GATA6/HGFAC/PLAT/ITPR1/CSN2/GJA1/NOS3/SAA1/ADM/GATA4/TAC1/VWF/MYL9/TYRO3/GNA15/CD9/SLC22A4/P2RX1/SRF/PLAUR/SERPINB2/HAS2/ALOX12B/THBD/MAFF/EDN1/SFN/SCNN1B/THBS1/NFE2/SERPINE1/SOCS2/IL6 |
| GOBP_PLACENTA_DEVELOPMENT | GOBP_PLACENTA_DEVELOPMENT | 131 | -0.368262439 | -1.590772145 | 0.001266758 | 0.014641101 | 0.011278292 | 2642 | tags=27%, list=17%, signal=23% | NCOA1/CEBPB/GHRL/CDX4/HEY1/FZD5/ADA/VDR/WNT7B/HES1/MC2R/PHLDA2/RBM15/EPOR/ADAM19/CITED1/GJB3/PDGFB/GCM1/GRHL2/NDP/LEP/HAND1/GHSR/STC2/CYP27B1/GJA1/ADM/EPAS1/ITGB8/IL10/STC1/LIF/SOCS3/FOSL1/JUNB |
| GOBP_ALPHA_LINOLENIC_ACID_METABOLIC_PROCESS | GOBP_ALPHA_LINOLENIC_ACID_METABOLIC_PROCESS | 13 | 0.710954444 | 1.896827749 | 0.001271815 | 0.014673393 | 0.011303167 | 2501 | tags=62%, list=16%, signal=52% | FADS2/FADS1/ELOVL2/ACOT8/ACAA1/ELOVL1/SCP2/ELOVL5 |
| GOBP_CELLULAR_RESPONSE_TO_BIOTIC_STIMULUS | GOBP_CELLULAR_RESPONSE_TO_BIOTIC_STIMULUS | 201 | -0.338851538 | -1.562814615 | 0.001274846 | 0.014682244 | 0.011309985 | 2109 | tags=22%, list=14%, signal=20% | LDOC1/AKAP8/NFKBIB/IRAK1/IRF8/BMP6/TBXA2R/IL24/TICAM1/CXCL5/CX3CL1/TNFRSF1B/PDE4B/CEBPE/NOD2/TNIP2/IL1A/LILRB2/TGFB1/CXCL6/LBP/IRAK2/GHSR/TNFAIP3/BCL2L11/TRIB1/CXCL13/CSF3/CD274/SIRPA/CCL3/ICAM1/TNIP3/IL10/SBNO2/CXCL2/PPARGC1A/IL1B/CXCL1/NR1D1/CCL2/ZFP36/SERPINE1/ZC3H12A/IL6 |
| GOBP_MANNOSYLATION | GOBP_MANNOSYLATION | 28 | 0.571707619 | 1.830138108 | 0.001278146 | 0.014694144 | 0.011319152 | 3631 | tags=50%, list=23%, signal=38% | ALG1L/ALG11/PIGB/DPY19L4/TMTC4/ALG1/SDF2L1/DPM3/TMTC3/FKTN/ALG12/PIGV/NUS1/DPM1 |
| GOBP_PROTEIN_TARGETING_TO_MITOCHONDRION | GOBP_PROTEIN_TARGETING_TO_MITOCHONDRION | 85 | 0.40778012 | 1.668357167 | 0.001288145 | 0.014782889 | 0.011387514 | 4896 | tags=49%, list=31%, signal=34% | SIRT4/IMMP1L/C11orf65/TIMM17A/VPS11/FIS1/LRRK2/UBL5/TIMM8B/SAMM50/BAG4/FBXO7/PMPCB/LMAN1/IMMP2L/TIMM13/HSPA4/MFF/NPEPPS/SAE1/SREBF2/AIFM1/SH3GLB1/HTRA2/AGK/PDCD5/MIPEP/HAX1/FBXW7/ROMO1/HSP90AA1/CSNK2A2/PARL/TOMM40L/TIMM23/GRPEL2/TOMM22/BNIP3L/SREBF1/HSPD1/BID/MICALL2 |
| GOBP_KINETOCHORE_ORGANIZATION | GOBP_KINETOCHORE_ORGANIZATION | 17 | 0.651595581 | 1.854731025 | 0.001308413 | 0.014973093 | 0.011534031 | 3511 | tags=65%, list=23%, signal=50% | NDC80/SMC2/CENPK/SMC4/MIS12/CDT1/NUF2/CENPH/DLGAP5/CENPN/CENPE |
| GOBP_BONE_REMODELING | GOBP_BONE_REMODELING | 86 | -0.41455353 | -1.644698385 | 0.001311088 | 0.014973093 | 0.011534031 | 1177 | tags=17%, list=8%, signal=16% | PLEKHM1/TGFB1/LEP/RAB3D/LRP5/TNFAIP3/LEPR/GJA1/ADRB2/CSK/GDF5/CALCA/TGFB3/EPHA2/IL6 |
| GOBP_BILE_ACID_AND_BILE_SALT_TRANSPORT | GOBP_BILE_ACID_AND_BILE_SALT_TRANSPORT | 30 | 0.583143973 | 1.876039988 | 0.001313831 | 0.014973093 | 0.011534031 | 500 | tags=13%, list=3%, signal=13% | CYP7A1/SLCO1B1/SLC10A5/ATP8B1 |
| GOCC_PROTEASOME_ACCESSORY_COMPLEX | GOCC_PROTEASOME_ACCESSORY_COMPLEX | 24 | 0.608771961 | 1.868903114 | 0.001313956 | 0.014973093 | 0.011534031 | 3589 | tags=54%, list=23%, signal=42% | PSMD10/PSME2/PSMD14/PSMD4/PSMD7/PSMD1/PSMD13/PSMD11/PSMC6/PSMC4/PSMC3/PSME1/PSMD2 |
| GOCC_NUCLEAR_CHROMOSOME | GOCC_NUCLEAR_CHROMOSOME | 186 | 0.338659868 | 1.55487552 | 0.001329932 | 0.015128562 | 0.011653792 | 3385 | tags=33%, list=22%, signal=26% | GINS2/HDAC8/TOP2A/NDC80/FIGNL1/DSN1/MCM5/ACTR8/BRCA1/XPA/ING2/PCNA/CHEK1/SUDS3/ZRANB3/SMC2/TUBG1/STAG3/RCC1/BUB1/POLE2/POLD1/MCM6/MCM2/CENPK/ANP32E/ACTR6/IK/NCAPD2/MIS12/TFPT/PRIM2/RUVBL2/PRIM1/SMARCAD1/NEK2/ETAA1/KIFAP3/RBBP4/SMARCAL1/GINS3/WDHD1/ACTR5/NUF2/MLH1/RPA3/ATRX/POLD2/POLA2/KAT5/TARDBP/CDC5L/GINS1/SUV39H1/TRIM24/ZNHIT1/RUVBL1/ACTL6A/INCENP/RAD9A/CHMP1A/ING3 |
| GOBP_ENDOMEMBRANE_SYSTEM_ORGANIZATION | GOBP_ENDOMEMBRANE_SYSTEM_ORGANIZATION | 383 | 0.285930245 | 1.425917603 | 0.001332347 | 0.015129494 | 0.01165451 | 4042 | tags=34%, list=26%, signal=26% | REEP4/AKTIP/UBXN2B/CHMP4A/FNBP1L/COG4/SNX10/TMEM170A/TRIP11/STX18/SPAST/TMEM9/ATP8B1/MPP5/GOLPH3L/VPS37D/STX17/YWHAZ/VPS11/VRK1/MIA3/PDE4DIP/LRRK2/LMAN2L/GOLGA2/RAB18/ATP8B4/CHMP5/OPTN/TMED10/NUP93/REEP3/CHMP6/CCNB2/REEP6/SERP1/PTPRC/RAB33B/SYT7/LMAN2/CHMP2A/RAB30/DNAJC13/ANXA6/STAM2/ARV1/BIN1/VPS25/RAB2A/ARL1/VTA1/ABCD2/CLASP2/NEK9/PACSIN2/BCAS3/LYSMD3/OSBPL2/LMAN1/PRKCB/STX2/BAIAP2/RAB3A/XKR9/SEC31A/RNF26/DNAJC28/BAIAP2L2/MAPK3/UBXN2A/HACE1/KIFC3/RAB10/STX4/PI4K2B/TMED2/SPAG4/MTSS1/CAV2/TARDBP/GBF1/EIF2AK3/TMF1/PTEN/TMED1/VPS4B/SEC16B/BLZF1/PLEKHJ1/PDCD6IP/PRKD1/DYM/SH3GLB1/COG1/RAB3GAP2/SYNJ1/VAMP4/GORASP2/BIN2/CLCN3/PARP11/USP6NL/STX16/ZMPSTE24/CHMP1A/FASLG/TBC1D20/PAFAH1B1/PI4K2A/RTN4/COG3/SPTBN5/TMED4/SYPL2/STX5/ANO6/ATL2/SEC31B/EXOC8/CUL7/USO1/TRAM1/ZW10/GOLGB1/ARL6IP1/NSFL1C/AP3B1/SNX3/ARFGEF1/CHMP2B |
| GOBP_REGULATION_OF_HORMONE_BIOSYNTHETIC_PROCESS | GOBP_REGULATION_OF_HORMONE_BIOSYNTHETIC_PROCESS | 20 | -0.655836485 | -1.917168258 | 0.001361154 | 0.015424109 | 0.011881457 | 1751 | tags=45%, list=11%, signal=40% | BMP6/FFAR3/BMP2/H6PD/STC2/CYP27B1/ADM/PPARGC1A/EGR1 |
| GOBP_BLOOD_VESSEL_REMODELING | GOBP_BLOOD_VESSEL_REMODELING | 40 | -0.50705385 | -1.759782544 | 0.00136305 | 0.015424109 | 0.011881457 | 2486 | tags=38%, list=16%, signal=32% | SEMA3C/HOXA3/CST3/FGF10/DBH/JAG1/TGFB1/TGM2/CEACAM1/NOS3/EPAS1/FOXC2/ACVR2B/LIF/FOXC1 |
| GOMF_UBIQUITIN_LIKE_PROTEIN_TRANSFERASE_ACTIVITY | GOMF_UBIQUITIN_LIKE_PROTEIN_TRANSFERASE_ACTIVITY | 389 | 0.286565152 | 1.429883519 | 0.00136766 | 0.015449318 | 0.011900876 | 3429 | tags=28%, list=22%, signal=22% | RNF43/TRIM55/TRIM22/AKTIP/FANCL/TRIM5/FBXO27/FBXO2/BRCA1/DTL/NHLRC1/TRIM68/UBE2T/HERC6/RNF128/HERC4/RNF214/MIB1/VPS11/TRIM32/TRIM14/CDC23/UBA3/RNF141/SEL1L/FBXO6/RNF185/RNF170/UHRF2/RNF20/ATG10/TRIM31/RFPL1/RNF7/FBXW2/NSMCE2/STUB1/RNF121/MED7/RNF186/RNF14/PJA1/CBX4/TRAF3/AMFR/TRIM23/FBXO3/RNF144B/RNF157/CUL5/PEX12/FBXO7/RNF181/ERCC8/NHLRC3/CDC34/RNF213/MED11/DDB2/HERC2/BTRC/MAEA/FBXO22/RBX1/UFC1/FBXO25/TSPAN17/BFAR/UBE2Q2/UBE2F/FBXL5/RNF26/UBR3/TRIM47/ANAPC11/UBE2H/RNF139/HACE1/TRIM9/MED31/RNF146/MED1/RNF5/SMURF2/VHL/TAF1/MED10/RNF208/TRIM24/HERC1/HLTF/LRSAM1/RNF216/TRIM59/KLHL13/TRIM56/ATG3/WDSUB1/RNF34/FBXO4/ANKRD39/ZBED1/NEDD4/MED30/XIAP/RNF8/UBE2E1 |
| GOBP_NEGATIVE_REGULATION_OF_T_HELPER_CELL_DIFFERENTIATION | GOBP_NEGATIVE_REGULATION_OF_T_HELPER_CELL_DIFFERENTIATION | 18 | -0.662912621 | -1.865459183 | 0.001379655 | 0.015539234 | 0.01197014 | 686 | tags=22%, list=4%, signal=21% | JAK3/BCL6/IL4R/ZC3H12A |
| GOBP_POSITIVE_REGULATION_OF_EPITHELIAL_TO_MESENCHYMAL_TRANSITION | GOBP_POSITIVE_REGULATION_OF_EPITHELIAL_TO_MESENCHYMAL_TRANSITION | 46 | -0.501624515 | -1.797198449 | 0.001380413 | 0.015539234 | 0.01197014 | 3302 | tags=41%, list=21%, signal=33% | TIAM1/LOXL2/ALX1/BAMBI/ISL1/WWTR1/ACVR1/TGFB2/TGFBR2/PDPN/BMP2/JAG1/TGFB1/SMAD3/TCF7L2/IL1B/TGFB3/FOXC1/IL6 |
| GOMF_DELAYED_RECTIFIER_POTASSIUM_CHANNEL_ACTIVITY | GOMF_DELAYED_RECTIFIER_POTASSIUM_CHANNEL_ACTIVITY | 31 | -0.557635586 | -1.803713591 | 0.00139361 | 0.015660604 | 0.012063633 | 4223 | tags=84%, list=27%, signal=61% | KCNH1/KCNH2/KCNA3/KCNQ1/KCNC4/KCNE1/KCNA6/KCNQ5/KCNQ2/KCNQ4/KCNA4/KCNA2/KCNG1/KCNG3/KCNC1/KCNC2/KCNA10/KCNG2/KCNS1/KCNB2/KCNA1/KCNS3/KCNG4/KCNA5/KCNC3/KCNE4 |
| GOBP_NEGATIVE_REGULATION_OF_FIBRINOLYSIS | GOBP_NEGATIVE_REGULATION_OF_FIBRINOLYSIS | 10 | -0.76677714 | -1.793737927 | 0.001401187 | 0.01571851 | 0.012108239 | 113 | tags=30%, list=1%, signal=30% | THBD/THBS1/SERPINE1 |
| GOBP_POSITIVE_REGULATION_OF_SYNAPSE_ASSEMBLY | GOBP_POSITIVE_REGULATION_OF_SYNAPSE_ASSEMBLY | 51 | -0.490975449 | -1.796642377 | 0.001404351 | 0.01572679 | 0.012114617 | 2959 | tags=43%, list=19%, signal=35% | OXTR/NTRK1/GHRL/LINGO2/CLSTN2/CBLN1/SLITRK1/EEF2K/AMIGO3/LRRTM2/PTPRD/NLGN3/EPHB1/CUX2/TPBG/NTRK2/IL1RAP/NLGN1/SEMA4A/FLRT3/SLITRK2/SLITRK3 |
| GOBP_CELLULAR_RESPONSE_TO_ZINC_ION | GOBP_CELLULAR_RESPONSE_TO_ZINC_ION | 22 | -0.631656942 | -1.88160875 | 0.001408447 | 0.015745463 | 0.012129001 | 3271 | tags=55%, list=21%, signal=43% | MT1H/MT1G/MT3/MT2A/MT1E/MT1F/MT1X/GLRA1/GLRA2/MT1M/MT1A/MT1B |
| GOBP_FIBRINOLYSIS | GOBP_FIBRINOLYSIS | 25 | -0.591580172 | -1.827962449 | 0.00141514 | 0.015793061 | 0.012165667 | 593 | tags=24%, list=4%, signal=23% | PLAT/PLAUR/SERPINB2/THBD/THBS1/SERPINE1 |
| GOBP_ERROR_PRONE_TRANSLESION_SYNTHESIS | GOBP_ERROR_PRONE_TRANSLESION_SYNTHESIS | 20 | 0.660018609 | 1.948997634 | 0.001422956 | 0.015825804 | 0.012190889 | 3051 | tags=55%, list=20%, signal=44% | PCNA/RFC1/POLE2/POLH/RFC3/POLK/POLI/MAD2L2/RFC5/RPA3/RFC4 |
| GOBP_REGULATION_OF_SODIUM_ION_TRANSPORT | GOBP_REGULATION_OF_SODIUM_ION_TRANSPORT | 84 | -0.413585442 | -1.634288612 | 0.001422956 | 0.015825804 | 0.012190889 | 3343 | tags=37%, list=21%, signal=29% | AKT1/ATP1B1/FXYD6/NKX2-5/ATP1A1/NKAIN2/DRD3/DMPK/SCN5A/WNK4/PTPN3/WNK2/SCN2B/ATP1B3/HECW2/NKAIN1/SPTBN4/SLC9A1/SCN3B/MLLT6/SLC9A3R1/FXYD5/NETO2/ATP1B2/ATP1A2/ATP2B4/NOS1/ADRB2/OSR1/FGF14/SIK1 |
| GOCC_PRESYNAPSE | GOCC_PRESYNAPSE | 456 | -0.276289188 | -1.400398478 | 0.001434153 | 0.015887505 | 0.012238419 | 3184 | tags=27%, list=20%, signal=22% | SCN2A/CABP4/CNTN5/SYT4/SYN2/SLC32A1/KCNC1/KIF1A/NTF3/SYN3/PNOC/CALB2/NTSR1/NDEL1/DOC2A/PTPRN/BSN/ACTB/GRM2/CNTNAP1/SLC5A7/TANC1/HTR3A/SYP/MT3/ITSN1/CYP46A1/HAP1/SLC30A3/GRIK4/P2RY1/STX1B/SVOP/STX1A/LGI3/RAB40AL/PCDH8/SNAP91/PPFIA4/P2RY4/TH/NPTN/GABRA5/ATCAY/UCN3/GRIK3/SLC6A4/SLC29A4/KCNC2/KCTD16/RAB15/DNM1/WNT3A/SYNPR/SYNGR3/GAD1/CDH8/GRM7/PDLIM5/ELK1/ERC2/DOC2B/APBA1/EFNB2/SLC6A17/GLRA1/SYNGR1/PDYN/GRIK5/CRHR2/PDE4B/PTPRD/NLGN3/GHRH/SLC8A3/ATP6V1B1/SLC22A3/TNN/CHRM1/GRM4/TPBG/NAAA/SV2A/SLC6A11/NTRK2/BRSK1/NTF4/KCNA1/RAB3D/GOT1/KCTD8/CADPS/NUFIP1/GRM3/SPHK1/SYT12/NLGN1/PIP5K1C/PENK/SYN1/FLRT3/KCNC3/CNGB1/ATP2B4/GABRA2/RPH3A/PPFIA2/SLC4A8/SV2C/STX11/CDH10/EGFLAM/SNCAIP/CPLX1/ADCYAP1/P2RX1/CPLX3/CALCA/SLC8A2/GAD2/TNIK/FOSL1 |
| GOBP_TELOMERE_ORGANIZATION | GOBP_TELOMERE_ORGANIZATION | 134 | 0.369806161 | 1.633403065 | 0.001435848 | 0.015887505 | 0.012238419 | 4396 | tags=45%, list=28%, signal=32% | HDAC8/PKIB/PCNA/RFC1/TPRKB/FEN1/POLE2/SMC6/POLD1/RAD51C/AURKB/CCT3/PRIM2/RFC3/PRIM1/NSMCE2/NEK2/DCLRE1A/SMARCAL1/CCT6A/SMG1/XRCC3/DCP2/CCT7/RFC5/NEK7/RPA3/TNKS/MAPK3/ATRX/POLD2/DCLRE1C/APEX1/POLA2/HSP90AB1/NOP10/DCLRE1B/RFC4/SMG6/POT1/XRCC5/ERCC4/FBXO4/ZBTB48/XRCC1/HNRNPA1/ATM/XRN1/POLD3/EXO1/MAP3K4/TCP1/RPA1/HSP90AA1/RAD50/PTGES3/USP7/TNKS2/SP100/RECQL4 |
| GOBP_REGULATION_OF_PROTEIN_CATABOLIC_PROCESS | GOBP_REGULATION_OF_PROTEIN_CATABOLIC_PROCESS | 349 | 0.288104626 | 1.420340125 | 0.001436072 | 0.015887505 | 0.012238419 | 4332 | tags=36%, list=28%, signal=26% | EEF1A2/WNT5A/RAB26/CEBPA/ZDHHC2/TREM2/NUPR1/PSMD10/DTL/MAD2L1/OAZ2/PCSK9/TMEM9/AURKA/GPLD1/MAPK9/RNF128/PBK/VPS11/MTM1/ALAD/BAG2/TRIM32/LRRK2/IDE/SMAD7/PSME2/FZR1/PSMD14/KEAP1/RGN/RNF185/LAMP3/PHB/CCDC22/NSF/CHMP6/APC/RFPL1/ATXN3/XPO1/RPS7/HFE/F13B/STUB1/SNX12/RNF14/PSMD1/SGSM3/CYP51A1/RNF144B/DET1/MAD2L2/PDCL3/LRIG2/BANP/HMGCR/MFSD8/GIPC1/BTRC/PSEN1/EIF3H/FBXO22/RBX1/GABARAPL2/SNX1/ROCK1/FBXL5/CDKN1B/TMTC3/UBXN2A/RNF139/SDCBP/HACE1/CHEK2/CDC20/HSP90AB1/SMURF2/SUMO1/CTSC/TMF1/VPS35/PTEN/PARK7/TAF1/RHBDD3/MAGEF1/ANXA2/GLMN/PRKACA/PSMC4/ATG7/NUB1/SVIP/PSMC3/DDRGK1/NEDD4/PSME1/VCP/WDR91/TTC36/QRICH2/RPL11/PSMD2/FHIT/IL33/STX5/GNA12/PTK2B/ASB9/ATP13A2/SNX3/FBXW7/UBE2V2/MSN/CAMLG/GGA3/TLK2/HSP90AA1/CSNK2A2/LPCAT1/CDH1/USP7/CHFR/ADAM9 |
| GOBP_VASCULAR_WOUND_HEALING | GOBP_VASCULAR_WOUND_HEALING | 16 | -0.67146173 | -1.810158215 | 0.001438304 | 0.015887505 | 0.012238419 | 3490 | tags=69%, list=22%, signal=53% | KDR/SMOC2/ALOX5/CD34/SLC12A2/CXCR4/VEGFA/TNFAIP3/FOXC2/MCAM/SERPINE1 |
| GOBP_PEPTIDE_HORMONE_SECRETION | GOBP_PEPTIDE_HORMONE_SECRETION | 227 | -0.320233761 | -1.502227594 | 0.001443283 | 0.015915391 | 0.0122599 | 3320 | tags=30%, list=21%, signal=24% | FGG/TIAM1/TFR2/SLC16A1/CRH/CACNA1A/ACVR1C/CACNA1E/FGA/EGFR/SYTL4/IFNG/ALOX5/TNFSF11/MTNR1B/GLP1R/FOXA2/ISL1/PTPRN/ABCC8/ITSN1/GHRL/SSTR5/CARTPT/G6PC2/STX1A/VIP/UCN3/KCNC2/KALRN/RAC1/TRPM4/FFAR3/DOC2B/KCNG2/ADCY5/GHRH/TFAP2B/SLC30A8/CPT1A/LEP/KCNS3/EFNA5/GHSR/LRP5/KCNA5/FFAR2/ITPR1/GJA1/PER2/RASL10B/TCF7L2/GPR27/LTBP4/TRH/CPLX1/ADCYAP1/CPLX3/IL1RN/EDN3/IRS2/IL1B/INHBB/NR1D1/PIM3/EDN1/MIDN/IL6 |
| GOBP_MECHANORECEPTOR_DIFFERENTIATION | GOBP_MECHANORECEPTOR_DIFFERENTIATION | 49 | -0.482892968 | -1.742877766 | 0.00144805 | 0.015940846 | 0.012279508 | 2051 | tags=39%, list=13%, signal=34% | HES1/GABRA5/USH1G/PDZD7/ATOH1/SLC9A3R1/SLC44A4/GABRB2/CDH23/SLC4A7/TSKU/JAG1/NTRK2/NTF4/HES5/STRC/LHFPL5/POU4F3/SDC4 |
| GOBP_REGULATORY_T_CELL_DIFFERENTIATION | GOBP_REGULATORY_T_CELL_DIFFERENTIATION | 32 | -0.548922214 | -1.788278096 | 0.00145175 | 0.015954489 | 0.012290018 | 3448 | tags=44%, list=22%, signal=34% | TNFRSF18/CBFB/IL2RA/IFNG/KAT2A/TOX/CTLA4/PLA2G2D/NFATC2/LILRB2/DUSP10/IRF1/BCL6/SOCS1 |
| GOMF_LIGAND_GATED_CATION_CHANNEL_ACTIVITY | GOMF_LIGAND_GATED_CATION_CHANNEL_ACTIVITY | 103 | -0.396347208 | -1.626869226 | 0.001462785 | 0.016048559 | 0.012362481 | 3936 | tags=47%, list=25%, signal=35% | GRIN2C/CHRNA5/CHRNG/GRIN1/HTR3D/KCNJ13/SCNN1G/CHRNB4/KCNJ9/HTR3E/HCN2/CNGA2/CHRNA7/CHRNB2/CHRNA9/GRIN2D/CHRNA3/ABCC8/GRIA2/HTR3A/KCNJ12/KCNJ1/CHRNA4/GRIK4/CHRNA6/KCNJ14/RYR2/CNGA3/CNGB3/GRIK3/TRPA1/CNGA4/HTR3B/TRPM4/KCNA10/GRIK5/KCNJ6/TPCN1/SCNN1A/TPCN2/CNGB1/ITPR1/CHRNA10/HCN4/P2RX1/HTR3C/SCNN1B/KCNK1 |
| GOBP_LONG_TERM_SYNAPTIC_POTENTIATION | GOBP_LONG_TERM_SYNAPTIC_POTENTIATION | 80 | -0.426624066 | -1.682492521 | 0.001466515 | 0.016062307 | 0.012373072 | 4055 | tags=42%, list=26%, signal=32% | SLC1A1/GRIN2C/DRD2/NR2E1/YTHDF1/GIP/STAU1/CRH/AGER/CHRNA7/CALB2/GRIN2D/SHANK1/IGSF11/ABL1/CYP46A1/ARC/RGS14/SHANK3/NPTN/NFATC4/CRHR2/LRRTM2/SLC8A3/LILRB2/NTRK2/MPP2/TSHZ3/SYT12/NLGN1/SLC24A2/TNR/SLC8A2/FAM107A |
| GOBP_POSITIVE_REGULATION_OF_GROWTH | GOBP_POSITIVE_REGULATION_OF_GROWTH | 223 | -0.322404502 | -1.511365785 | 0.001471521 | 0.016089955 | 0.012394369 | 3120 | tags=27%, list=20%, signal=22% | SYT4/FXN/L1CAM/EGFR/NDEL1/FGF8/YAP1/ATP8A2/INSR/AGR2/HAMP/GHRL/DIO3/MAPT/SUPV3L1/TBX5/ARX/DBN1/TGFB2/ZFYVE27/MAP1B/SPTBN4/SLC9A1/ADNP2/WNT3A/CSF1/AVPR1A/ISLR2/SLC44A4/CXCR4/POU3F2/TGFBR2/PROX1/GHRH/PLCB1/DDX3X/CPNE6/POU4F2/LEP/VEGFA/IGF1/SPHK1/S100A9/GHSR/TGFBR3/GATA6/S100A8/RND2/RAG2/WT1/CACNG7/WNT3/SRF/CDH4/SLC23A2/EDN1/PIM1/SFN/HBEGF/IGFBP1/VIL1 |
| GOMF_CYTOKINE_BINDING | GOMF_CYTOKINE_BINDING | 126 | -0.373671197 | -1.597053788 | 0.001488434 | 0.016247487 | 0.012515719 | 2498 | tags=26%, list=16%, signal=22% | IL12A/CSF2RA/ACVR1/NOG/CXCR1/A2M/IL23R/WFIKKN2/LRRC32/IL18R1/IFNGR1/TNFRSF1B/CXCR4/TGFBR2/CCR7/HYAL2/PDPN/TSKU/TGFBR3/LEPR/EBI3/OSMR/CSF3R/LTBP4/GREM2/CHRD/TNFRSF1A/IL1RN/GDF5/IL1RL1/THBS1/TGFB3/ZFP36 |
| GOBP_REGULATION_OF_CENTROSOME_CYCLE | GOBP_REGULATION_OF_CENTROSOME_CYCLE | 40 | 0.499587262 | 1.708788904 | 0.001518334 | 0.016546011 | 0.012745677 | 3678 | tags=50%, list=24%, signal=38% | CDK5RAP2/BRCA1/AURKA/MDM1/CCNF/GEN1/CHMP5/CHMP2A/CEP120/XRCC3/NPM1/PLK4/CENPJ/VPS4B/PDCD6IP/KAT2B/FBXW5/CHMP1A/ALMS1/MCPH1 |
| GOCC_COPII_VESICLE_COAT | GOCC_COPII_VESICLE_COAT | 13 | 0.703511498 | 1.876969956 | 0.001528004 | 0.016595606 | 0.012783881 | 4096 | tags=92%, list=26%, signal=68% | KLHL12/SEC13/SEC23B/SEC24A/SEC24D/SEC23A/SEC31A/SAR1B/SAR1A/SEC24C/SEC31B/SEC24B |
| GOBP_ANTIGEN_RECEPTOR_MEDIATED_SIGNALING_PATHWAY | GOBP_ANTIGEN_RECEPTOR_MEDIATED_SIGNALING_PATHWAY | 226 | 0.316879789 | 1.490090142 | 0.001528004 | 0.016595606 | 0.012783881 | 4231 | tags=41%, list=27%, signal=30% | CD3G/BTN3A2/BTN3A1/PSMD10/CD160/SH2D1A/LGALS3/HLA-DRB3/PSMB9/PSMA2/CD3E/PIK3R1/PSMB7/PSME2/CD3D/PSMD14/PLCG1/PHPT1/THY1/PSMA4/BTK/PSMD4/TRAT1/PTPRC/CD300A/IKBKB/PSMD7/PSMD1/LCK/EIF2B3/ERMAP/VAV3/PIK3R2/PSMA3/MAP3K7/PSMD13/CD28/SKP1/NCKAP1L/SYK/BTRC/SLC39A10/PSEN1/PLCL2/INPP5D/PRKCB/CD247/CD226/CD22/PSMD11/FCRL3/PAK1/GRAP2/PAWR/RFTN1/NCK1/BTN2A2/IGLL1/PSMA1/MEF2C/PSMB10/LPXN/PSMC6/PSMB5/SKAP1/HLA-A/MS4A1/PSMC4/FCGR2B/KCNN4/CACNB3/PSMC3/SPG21/PSME1/ZAP70/PSMB1/TXK/CD79B/PSMD2/HRAS/HLA-DPA1/PRAM1/PSMA5/CARD11/BTNL2/HLA-DQB1/PIK3CB/RPS3/LILRB4/PSMC5/CUL1/WNK1 |
| GOMF_TRANSCRIPTION_COREGULATOR_BINDING | GOMF_TRANSCRIPTION_COREGULATOR_BINDING | 60 | -0.454178487 | -1.705115344 | 0.001537208 | 0.01664105 | 0.012818887 | 2742 | tags=32%, list=18%, signal=26% | ZBTB7A/SIX3/FAM89B/RELA/LCOR/USP11/WIZ/MED25/CDK9/PER3/NFE2L2/HAND1/SMAD3/PER2/TEAD2/CIT/NR1D1/FOXO1/KLF4 |
| GOBP_GLOMERULAR_MESANGIUM_DEVELOPMENT | GOBP_GLOMERULAR_MESANGIUM_DEVELOPMENT | 15 | -0.695205451 | -1.835555022 | 0.001537321 | 0.01664105 | 0.012818887 | 1398 | tags=40%, list=9%, signal=36% | PDGFB/ACTA2/WT1/GPR4/FOXC2/EGR1 |
| GOBP_REGULATION_OF_STEROID_METABOLIC_PROCESS | GOBP_REGULATION_OF_STEROID_METABOLIC_PROCESS | 108 | 0.392407299 | 1.676097175 | 0.001543223 | 0.016677091 | 0.012846651 | 1656 | tags=21%, list=11%, signal=19% | CYP7A1/GPAM/SQLE/HMGCS1/BMP5/MVK/FDFT1/ELOVL6/STARD4/LSS/IDI1/PMVK/TM7SF2/MVD/SEC14L2/NFYB/ACADL/RORC/CLCN2/STUB1/ARV1/APOA5/CYP51A1 |
| GOBP_VESICLE_MEDIATED_TRANSPORT_BETWEEN_ENDOSOMAL_COMPARTMENTS | GOBP_VESICLE_MEDIATED_TRANSPORT_BETWEEN_ENDOSOMAL_COMPARTMENTS | 39 | 0.524057348 | 1.798495494 | 0.001549922 | 0.016696784 | 0.01286182 | 5091 | tags=54%, list=33%, signal=36% | AKTIP/KIF16B/STX8/VPS11/DNAJC13/SNX12/ANKRD27/MAPK3/MYO1D/WDR91/BECN1/CORO1A/SNX3/EEA1/MSN/HOOK3/MAP2K1/RAB21/SNX16/RDX/HOOK2 |
| GOBP_REGULATION_OF_BIOMINERALIZATION | GOBP_REGULATION_OF_BIOMINERALIZATION | 87 | -0.41298318 | -1.643861774 | 0.001550195 | 0.016696784 | 0.01286182 | 3087 | tags=37%, list=20%, signal=30% | FBXO5/WNT10B/ALOX5/ATF4/STATH/FBN2/CEBPB/ACVR1/HEY1/TFAP2A/S1PR1/IFITM5/AMTN/BMP6/TRPM4/AMELX/NELL1/BMP2/TGFB1/BCOR/MGP/GPM6B/SMAD3/CYP27B1/NOS3/ADRB2/CCL3/SGMS2/OSR1/KL/ACVR2B/TGFB3 |
| GOBP_T_CELL_ACTIVATION_INVOLVED_IN_IMMUNE_RESPONSE | GOBP_T_CELL_ACTIVATION_INVOLVED_IN_IMMUNE_RESPONSE | 103 | -0.395079814 | -1.621667011 | 0.001555955 | 0.01673103 | 0.012888201 | 1816 | tags=19%, list=12%, signal=17% | IFNA14/STAT3/IL18R1/RAB27A/IRF4/IFNA8/RELB/FOXP1/GATA3/CEACAM1/SEMA4A/JAK3/ICAM1/SLC11A1/NFKBIZ/BCL6/IL4R/BCL3/ZC3H12A/IL6 |
| GOCC_INTEGRAL_COMPONENT_OF_PRESYNAPTIC_ACTIVE_ZONE_MEMBRANE | GOCC_INTEGRAL_COMPONENT_OF_PRESYNAPTIC_ACTIVE_ZONE_MEMBRANE | 11 | -0.741600506 | -1.791430486 | 0.001558748 | 0.016733313 | 0.012889959 | 2460 | tags=55%, list=16%, signal=46% | P2RY1/P2RY4/NPTN/ATP2B4/CDH10/P2RX1 |
| GOMF_SNARE_BINDING | GOMF_SNARE_BINDING | 105 | 0.383171459 | 1.630592888 | 0.001569866 | 0.01682481 | 0.012960441 | 2645 | tags=33%, list=17%, signal=28% | SCFD1/STX17/STX8/VPS11/NAPB/VTI1B/LRRK2/GOLGA2/STX7/NAPG/SNAP47/TMED10/SCFD2/SNAPIN/RAB4A/NSF/STXBP3/VAMP8/VAMP3/SEC24A/NBAS/SEC24D/SYT7/GOSR2/UVRAG/STX2/GABARAPL2/VAMP1/SYT9/ANKRD27/STX10/VPS54/TRIM9/SNAP23/STX4 |
| GOBP_COPII_COATED_VESICLE_CARGO_LOADING | GOBP_COPII_COATED_VESICLE_CARGO_LOADING | 15 | 0.675454306 | 1.873877351 | 0.001572944 | 0.016829982 | 0.012964425 | 4499 | tags=87%, list=29%, signal=62% | MIA3/SEC13/SEC23B/SEC24A/SEC24D/SEC23A/SEC31A/SAR1A/TBC1D20/SEC24C/SEC31B/SEC24B/RAB1A |
| GOMF_HEPARIN_BINDING | GOMF_HEPARIN_BINDING | 147 | -0.356949584 | -1.564984075 | 0.001577194 | 0.016847658 | 0.012978041 | 1977 | tags=24%, list=13%, signal=21% | FGF10/SELL/CCL8/ADAMTS15/SLIT3/PGF/PLA2G2D/LPA/AZU1/BSPH1/RSPO1/SMOC1/NELL1/FGFRL1/APLP1/VEGFA/CXCL6/PCOLCE/DEFB106B/SOD3/TGFBR3/PRG2/ELSPBP1/CXCL13/LAMC2/FGF9/SAA1/GREM2/CCL7/FGFR1/TNXB/CRISPLD2/HBEGF/THBS1/ADAMTS1 |
| GOBP_ADENYLATE_CYCLASE_INHIBITING_G_PROTEIN_COUPLED_RECEPTOR_SIGNALING_PATHWAY | GOBP_ADENYLATE_CYCLASE_INHIBITING_G_PROTEIN_COUPLED_RECEPTOR_SIGNALING_PATHWAY | 79 | -0.421825496 | -1.662869427 | 0.001594834 | 0.017004298 | 0.013098703 | 2716 | tags=32%, list=17%, signal=26% | DRD3/GRM2/HTR1F/P2RY1/HTR4/S1PR1/ADCY4/GRIK3/GRM7/FFAR3/FPR2/ADCY5/ADCY3/CHRM1/GRM4/INSL3/GRM3/CHRM5/GPR37L1/GNAT1/AKAP12/RGS1/LPAR1/EDN1/RGS2 |
| GOBP_SIGNAL_TRANSDUCTION_INVOLVED_IN_G2_DNA_DAMAGE_CHECKPOINT | GOBP_SIGNAL_TRANSDUCTION_INVOLVED_IN_G2_DNA_DAMAGE_CHECKPOINT | 10 | 0.744581688 | 1.836353733 | 0.001597184 | 0.017004298 | 0.013098703 | 976 | tags=50%, list=6%, signal=47% | BRCA1/DTL/CHEK1/BRCC3/FZR1 |
| GOCC_CYTOSOLIC_LARGE_RIBOSOMAL_SUBUNIT | GOCC_CYTOSOLIC_LARGE_RIBOSOMAL_SUBUNIT | 54 | 0.475493615 | 1.753199111 | 0.001599726 | 0.017004298 | 0.013098703 | 5602 | tags=61%, list=36%, signal=39% | RPL39L/RPL7A/MRPL1/RPL26/RPL23A/RPL37/RPL7/RPL35A/RPL13A/RPL8/RPL15/RPLP0/RPL34/RPL17/RPL41/RPL29/RPL9/RPL11/RPL36AL/RPL3/RPL21/RPL3L/RPL31/RPL27A/RPL23/RPL22/RPL37A/RPL19/RPL24/RPL6/RPL35/RPL10/RPL26L1 |
| GOBP_REGULATION_OF_EXTRACELLULAR_MATRIX_ORGANIZATION | GOBP_REGULATION_OF_EXTRACELLULAR_MATRIX_ORGANIZATION | 39 | -0.523397419 | -1.793668442 | 0.001614212 | 0.017130202 | 0.01319569 | 2594 | tags=31%, list=17%, signal=26% | ABL1/TCF15/CST3/TNFRSF1B/PDPN/BMP2/TGFB1/PHLDB1/SMAD3/TNFRSF1A/HAS2/IL6 |
| GOBP_EXTRACELLULAR_MATRIX_ASSEMBLY | GOBP_EXTRACELLULAR_MATRIX_ASSEMBLY | 43 | -0.504422998 | -1.778996489 | 0.001630848 | 0.017278463 | 0.013309898 | 1032 | tags=21%, list=7%, signal=20% | TGFB1/LOX/GPM6B/PHLDB1/SMAD3/TNXB/HAS2/HAS1/MYH11 |
| GOBP_NEGATIVE_REGULATION_OF_PROTEIN_SERINE_THREONINE_KINASE_ACTIVITY | GOBP_NEGATIVE_REGULATION_OF_PROTEIN_SERINE_THREONINE_KINASE_ACTIVITY | 129 | -0.368497722 | -1.580356503 | 0.001649513 | 0.017447707 | 0.013440269 | 2668 | tags=29%, list=17%, signal=24% | CBLC/SIRT1/ADIPOQ/ABL1/SPRY3/SPRED1/DUSP19/CAV1/CDKN2B/RGS14/RGS4/PTPN1/SPRY1/DUSP1/DUSP16/SLC8A3/DUSP9/HYAL2/DUSP21/SPRED2/DUSP10/LRP5/TNFAIP3/IRAK3/DUSP5/TFAP4/CDKN1A/SPRY2/LATS2/DUSP8/DUSP6/CIT/RASIP1/IL1B/RGS2/SFN/SPRY4 |
| GOBP_REGULATION_OF_DNA_BINDING_TRANSCRIPTION_FACTOR_ACTIVITY | GOBP_REGULATION_OF_DNA_BINDING_TRANSCRIPTION_FACTOR_ACTIVITY | 394 | -0.278809944 | -1.386813969 | 0.001670973 | 0.017645907 | 0.013592946 | 1784 | tags=16%, list=11%, signal=15% | PPP2R5B/WNT3A/STAT3/IL18R1/LRRFIP1/NLRP12/TICAM1/CX3CL1/TFRC/CYTL1/PRKCQ/NKX3-1/PROX1/EGLN1/TRIML2/NOD2/HIPK2/NLRP2/BEX1/NDP/POU4F2/VEGFA/CRTC3/IL1RAP/SGK1/TRAIP/HAND1/SPHK1/IRAK2/S100A9/LRP5/TNFAIP3/IRAK3/FLOT2/S100A8/SMAD3/TRIB1/POU4F1/CSF3/NWD1/TCF7L2/ARHGEF5/PLA2G10/ICAM1/SRF/IL10/PELI1/TRIM15/JUN/ARID5B/PPARGC1A/IL1B/IL18RAP/PPRC1/EDN1/PIM1/S100A12/KLF4/SIK1/FOSL1/ZC3H12A/FOS/IL6 |
| GOMF_HISTONE_KINASE_ACTIVITY | GOMF_HISTONE_KINASE_ACTIVITY | 13 | 0.700868407 | 1.869918184 | 0.001674397 | 0.017653322 | 0.013598658 | 2202 | tags=46%, list=14%, signal=40% | PRKAA2/CHEK1/AURKA/VRK1/AURKB/PRKCB |
| GOBP_RESPONSE_TO_ZINC_ION | GOBP_RESPONSE_TO_ZINC_ION | 55 | -0.458667065 | -1.713206734 | 0.001679025 | 0.017653439 | 0.013598748 | 2945 | tags=40%, list=19%, signal=33% | MT1G/ASS1/SOD2/MT3/HAMP/SLC30A3/MT2A/APOBEC1/TH/HAAO/MT1E/MT1F/SLC30A1/MT1X/GLRA1/GLRA2/SLC30A8/CRIP1/S100A8/MT1M/MT1A/MT1B |
| GOBP_MESONEPHROS_DEVELOPMENT | GOBP_MESONEPHROS_DEVELOPMENT | 91 | -0.40326357 | -1.616464894 | 0.001679854 | 0.017653439 | 0.013598748 | 3819 | tags=37%, list=25%, signal=28% | HOXD11/GDNF/SFRP1/WNT1/BASP1/LAMA5/FOXJ1/LHX1/TCF21/FGF8/PTCH1/SOX8/NOG/HOXA11/HES1/GLI3/FGF10/SPRY1/GZF1/CITED1/SIX4/BMP2/VEGFA/GATA3/SMAD3/ADAMTS16/WT1/ARG2/FOXC2/OSR1/TACSTD2/SDC4/FOXC1/MYC |
| GOBP_NEGATIVE_REGULATION_OF_TUMOR_NECROSIS_FACTOR_SUPERFAMILY_CYTOKINE_PRODUCTION | GOBP_NEGATIVE_REGULATION_OF_TUMOR_NECROSIS_FACTOR_SUPERFAMILY_CYTOKINE_PRODUCTION | 52 | -0.479116965 | -1.762372452 | 0.001696792 | 0.017802591 | 0.013713642 | 1161 | tags=37%, list=7%, signal=34% | CHRNA7/IL4/CD34/ADIPOQ/GHRL/AKAP8/CX3CL1/NOD2/IGF1/LBP/GHSR/TNFAIP3/IRAK3/CD274/SIRPA/ARG2/IL10/BCL3/ZC3H12A |
| GOBP_EAR_MORPHOGENESIS | GOBP_EAR_MORPHOGENESIS | 100 | -0.392783171 | -1.602837255 | 0.001700216 | 0.01780969 | 0.01371911 | 3711 | tags=47%, list=24%, signal=36% | PAX2/OSR2/TBX1/CHD7/KCNQ4/DLX5/PTK7/CLRN1/GRHL3/WNT1/USH1C/NAGLU/GBX2/GJB6/CHRNA9/FOXI1/FGF8/OTX1/ATP8A2/NOG/TFAP2A/FZD6/FGF10/USH1G/MYO3B/MYO3A/PDZD7/WNT3A/ATOH1/SLC9A3R1/SLC44A4/PROX1/ATP6V1B1/SIX4/HMX2/PRRX1/GATA3/STRC/CHRNA10/ALDH1A3/SPRY2/LHFPL5/OSR1/LRIG1/MSX1/POU4F3/EDN1 |
| GOBP_CELLULAR_RESPONSE_TO_STEROID_HORMONE_STIMULUS | GOBP_CELLULAR_RESPONSE_TO_STEROID_HORMONE_STIMULUS | 181 | -0.336841481 | -1.533106076 | 0.001719001 | 0.017977426 | 0.013848321 | 3427 | tags=32%, list=22%, signal=25% | CBFB/STAR/SCNN1G/ZFP36L1/SSTR2/CRH/STRN3/SSTR3/TCF21/EGFR/ATP1A1/DDX5/PCK1/HNRNPU/ASS1/YAP1/ISL1/ZBTB7A/CRY1/SIRT1/SSTR5/ESR2/MSTN/HEY1/ABHD2/SRD5A1/ZMIZ1/NCOR1/CST11/LMO3/TRERF1/NR2E3/DDX54/NKX3-1/PMEPA1/WBP2/FLT3/KLF9/POU4F2/NPC1/AXIN1/SCGB2A1/FOXP1/ATP1A2/SGK1/ZFP36L2/BCL2L11/TFAP4/ICAM1/NR4A3/ADCYAP1/STC1/NR1D1/FOXO1/EDN1/SCNN1B/ZFP36/FAM107A |
| GOBP_CILIUM_ORGANIZATION | GOBP_CILIUM_ORGANIZATION | 300 | 0.292725446 | 1.418788683 | 0.001722532 | 0.017985343 | 0.013854419 | 3857 | tags=30%, list=25%, signal=23% | NINL/BBS10/ABCC4/CDK5RAP2/FNBP1L/ONECUT1/CETN2/SNX10/TRIP11/CEP290/IFT80/UNC119B/BBS4/TUBG1/ATP6V0D1/IFT52/CCDC66/PKD2/RAB8A/TTC8/ATG5/BBS2/CLUAP1/EVI5L/DYNC1I2/CEP78/SDCCAG8/ONECUT2/NEDD1/CEP250/HDAC6/KIF3A/TBC1D7/NEK2/MNS1/CEP152/KIFAP3/HYLS1/CEP120/TMEM80/FAM149B1/TTC30B/TCTN1/SSX2IP/CEP70/ATP6V1D/VDAC3/TTC17/GALNT11/ACTR2/NEK1/CEP63/KIF3B/ODF2L/CNTROB/DYNC2LI1/CEP192/SPAG16/DYNLL1/IFT172/PLK4/DYNC1H1/DCDC2/CENPJ/ARL6/TAPT1/MEIG1/TMEM138/PRKACA/TTC12/CCDC88A/ATG3/CCDC28B/IQCB1/TCTN2/BBS12/TCHP/B9D1/PAFAH1B1/MKKS/ALMS1/BBS5/TTC36/CYLD/IFT20/OFD1/IFT74/FUZ/TRAF3IP1/IQCG/CEP97 |
| GOBP_NEGATIVE_REGULATION_OF_CELL_MATRIX_ADHESION | GOBP_NEGATIVE_REGULATION_OF_CELL_MATRIX_ADHESION | 34 | -0.547199537 | -1.807797798 | 0.001733299 | 0.018059874 | 0.013911832 | 128 | tags=18%, list=1%, signal=18% | JAG1/APOD/THBS1/BCL6/SERPINE1/FAM107A |
| GOBP_REGULATION_OF_ORGANELLE_ASSEMBLY | GOBP_REGULATION_OF_ORGANELLE_ASSEMBLY | 162 | 0.335194141 | 1.509815913 | 0.001735241 | 0.018059874 | 0.013911832 | 4217 | tags=40%, list=27%, signal=30% | PRKAA2/CDK5RAP2/CHMP4A/NUPR1/BRCA1/SCFD1/STX18/MAPK9/BBS4/RCC1/ATG5/VPS11/MDM1/MTM1/EVI5L/LRRK2/PIP4K2B/CHMP5/SDCCAG8/TBC1D7/CHMP2A/MNS1/CEP120/FEZ2/VDAC3/NPM1/ODF2L/CNTROB/DYNC2LI1/PAN2/SDCBP/DYNLL1/PLK4/DYNC1H1/DCDC2/RNF5/CENPJ/PIP4K2C/TAPT1/VPS4B/PDCD6IP/SH3GLB1/RAB3GAP2/LRSAM1/CCDC88A/ATG3/KAT2B/SDC1/CHMP1A/TCHP/ALMS1/STYXL1/DRG1/FEZ1/CYLD/IFT20/BECN1/FUZ/CEP97/FSCN1/CDKL5/CHMP2B/MSN/CROCC/ADPRH |
| GOBP_ALCOHOL_CATABOLIC_PROCESS | GOBP_ALCOHOL_CATABOLIC_PROCESS | 50 | 0.480554695 | 1.740634884 | 0.001752151 | 0.018206645 | 0.014024892 | 2204 | tags=22%, list=14%, signal=19% | CYP7A1/AKR1B10/CYP39A1/SULT1E1/SULT2A1/HAO1/SULT1B1/BPNT1/ALDH1B1/AKR1D1/INPP5A |
| GOBP_NEGATIVE_REGULATION_OF_FAT_CELL_DIFFERENTIATION | GOBP_NEGATIVE_REGULATION_OF_FAT_CELL_DIFFERENTIATION | 44 | -0.506775613 | -1.795166208 | 0.001785629 | 0.018470257 | 0.014227957 | 3063 | tags=39%, list=20%, signal=31% | WNT10B/YAP1/WWTR1/SIRT1/ADIPOQ/ASXL1/TRIO/WNT3A/TRIB2/JAG1/TGFB1/GATA3/ZFP36L2/SMAD3/C1QL4/FOXO1/IL6 |
| GOBP_DEVELOPMENTAL_CELL_GROWTH | GOBP_DEVELOPMENTAL_CELL_GROWTH | 203 | -0.331342427 | -1.531628477 | 0.00178866 | 0.018470257 | 0.014227957 | 2691 | tags=27%, list=17%, signal=23% | OSTN/ULK1/ABL1/MT3/HAMP/SIN3A/SEMA6A/SEMA3C/SEMA6C/MAPT/MAP2/AKAP13/TRIM46/DBN1/RGS4/ZFYVE27/KIAA0319/SEMA3D/MAP1B/VCL/TMEM108/WNT3A/SLIT3/SEMA4F/ISLR2/PDLIM5/SEMA3B/CXCR4/NLGN3/TGFBR2/TNN/SEMA3A/CPNE6/POU4F2/VEGFA/IGF1/C9orf72/DCC/PI16/SEMA4A/FLRT3/RND2/PLXNA3/GATA4/CACNG7/MAG/WNT3/SEMA4B/SRF/CDH4/SLC23A2/POU4F3/TNR/EDN1/RGS2 |
| GOBP_PEPTIDYL_TYROSINE_MODIFICATION | GOBP_PEPTIDYL_TYROSINE_MODIFICATION | 349 | -0.290149914 | -1.426309158 | 0.001789524 | 0.018470257 | 0.014227957 | 3869 | tags=31%, list=25%, signal=24% | NRG1/ZFYVE28/CSH2/GH1/SFRP1/CCK/BLK/CLEC7A/EPHB4/MAP2K4/DYRK4/IL23A/LILRA5/CD80/KDR/PDGFD/EPHA10/SRMS/TNFRSF18/ACE/IL13/SCYL1/EFNA1/TGFA/GH2/HIPK3/RIPK2/IFNA2/FGR/NCK2/AFAP1L2/EGFR/IL4/EPHA8/NTF3/IFNG/MST1R/FGF8/NTRK1/SAMSN1/ISL1/INSR/AATK/EREG/CBLC/ADIPOQ/CSPG4/ABL1/GHRL/IL12A/ACVR1/LMTK2/MET/CAV1/EHD4/HES1/WEE1/IL23R/FGF10/PTPN1/PDGFC/PPP2R5B/BMP6/WNT3A/STAT3/IL24/MAP2K3/ROS1/CTF1/TTBK1/TPST1/PDGFB/IL11/FLT3/EPHB1/HYAL2/NOD2/HIPK2/NTRK3/TGFB1/LEP/ABL2/NTRK2/EFNA5/VEGFA/IGF1/HES5/JAK3/NEDD9/EPO/CSF3/CSK/IL20/ANGPT4/TYRO3/ICAM1/FGFR1/CASS4/TNFRSF1A/OSM/LRP4/HBEGF/LIF/GPRC5A/CLCF1/SOCS3/EPHA2/SOCS1/IL6 |
| GOBP_NADP_METABOLIC_PROCESS | GOBP_NADP_METABOLIC_PROCESS | 31 | 0.547023222 | 1.775282175 | 0.00178958 | 0.018470257 | 0.014227957 | 3972 | tags=65%, list=26%, signal=48% | FMO1/ME1/TP53I3/IDH1/RBKS/TALDO1/PGAM1/KCNAB2/NUDT12/PGD/FMO2/NQO1/NNT/SHPK/TKT/RPE/ME2/NUDT13/DERA/IDH2 |
| GOBP_MONOCARBOXYLIC_ACID_CATABOLIC_PROCESS | GOBP_MONOCARBOXYLIC_ACID_CATABOLIC_PROCESS | 118 | 0.376279283 | 1.631098781 | 0.001791763 | 0.018470257 | 0.014227957 | 3692 | tags=40%, list=24%, signal=31% | AKR1A1/AMACR/ACBD5/ECHDC1/SULT2A1/ACADL/HADH/ACOT8/ACAA1/HAO1/BDH2/NUDT7/PHYH/CYP26A1/IRS1/SCP2/DECR1/HACL1/ACADM/PCCB/ABCD2/AUH/CYP4F2/AKR1D1/PGD/ABHD1/CROT/EHHADH/ABCD3/HSD17B10/FAH/TYSND1/CPT1B/PEX7/ETFA/ACAT2/PECR/MCEE/ALDH3A2/ACAT1/XYLB/IVD/ACOX2/HADHB/AGXT2/ACAD10/ECH1 |
| GOBP_POSITIVE_REGULATION_OF_CELL_ACTIVATION | GOBP_POSITIVE_REGULATION_OF_CELL_ACTIVATION | 313 | -0.304145215 | -1.4810745 | 0.001799244 | 0.01851793 | 0.01426468 | 1504 | tags=16%, list=10%, signal=15% | TTBK1/TFRC/PRKCQ/TGFBR2/CCR7/NFATC2/NOD2/TNIP2/IL1A/LILRB2/TGFB1/LEP/CLEC4D/DUSP10/GATA3/IGF1/CCL21/LBP/FLOT2/JAK3/HAVCR1/EBI3/EPO/TNFRSF13C/CDKN1A/CD274/SIRPA/TAC1/CSK/PLA2G3/CCL3/TNFSF14/SIRPB1/NR4A3/SLC7A1/EGR3/IL10/PELI1/IRS2/MAP3K8/IL1B/IL1RL1/NFKBIZ/THBS1/CLCF1/BCL6/IL4R/CCL2/IGFBP2/SOCS1/IL6 |
| GOBP_GRANULOCYTE_CHEMOTAXIS | GOBP_GRANULOCYTE_CHEMOTAXIS | 109 | -0.385490924 | -1.607193147 | 0.001802492 | 0.018521964 | 0.014267788 | 2086 | tags=31%, list=13%, signal=27% | TGFB2/CCL11/CCL8/RAC1/CCL25/CSF1/CXCL5/CX3CL1/PDE4B/AKIRIN1/CCL20/CCR7/NOD2/CCL3L3/CXCL6/CCL21/LBP/S100A9/PIP5K1C/S100A8/CCL26/CXCL13/CSF3R/SAA1/C5AR1/CCL3/CCL7/EDN3/CXCL2/CXCL1/EDN1/S100A12/THBS1/CCL2 |
| GOBP_CARDIOCYTE_DIFFERENTIATION | GOBP_CARDIOCYTE_DIFFERENTIATION | 119 | -0.376956921 | -1.591707872 | 0.00180582 | 0.018526794 | 0.014271508 | 3131 | tags=37%, list=20%, signal=30% | NKX2-5/ACTC1/EGFR/HNRNPU/ISL1/BVES/HAMP/SEMA3C/ACVR1/KAT2A/MAML1/AKAP13/TBX5/TGFB2/HES1/DKK1/RGS4/SLC9A1/SPRY1/WNT3A/CSRP3/PDLIM5/FZD7/EFNB2/PROX1/FHOD3/BMP2/JAG1/TGFB1/VEGFA/IGF1/TGFBR3/GATA6/PI16/KDM6B/WT1/GATA4/SRF/MYO18B/SOX17/MYH11/EDN1/RGS2/SIK1 |
| GOBP_CELL_CYCLE_DNA_REPLICATION | GOBP_CELL_CYCLE_DNA_REPLICATION | 58 | 0.448629302 | 1.688393077 | 0.001809229 | 0.018532445 | 0.014275861 | 3344 | tags=45%, list=21%, signal=35% | MCM5/PCNA/RFC1/FEN1/POLE2/GMNN/POLD1/MCM6/MCM2/DONSON/CDT1/PRIM2/RFC3/PRIM1/GINS3/RFC5/RPA3/ATRX/POLD2/POLA2/CHEK2/GINS1/RFC4/SENP2/ZNF830/ZMPSTE24 |
| GOBP_STRIATED_MUSCLE_CELL_DIFFERENTIATION | GOBP_STRIATED_MUSCLE_CELL_DIFFERENTIATION | 229 | -0.319330612 | -1.503171539 | 0.001828197 | 0.018697209 | 0.014402782 | 3669 | tags=35%, list=24%, signal=27% | MYOF/MAP2K4/WNT1/MYOCD/G6PD/CFL2/KRT19/MYOZ1/LMOD3/AKT1/TMEM119/BHLHA15/NKX2-5/CEACAM5/LMOD1/ACTC1/WNT10B/IL4/SKI/HNRNPU/ISL1/JAM2/BVES/DMPK/TANC1/HAMP/ACVR1/KAT2A/MAML1/AKAP13/TBX5/DKK1/RGS4/WDR1/MYPN/KEL/SMYD1/RBM24/SLC9A1/WFIKKN2/WNT3A/AVPR1A/CSRP3/PDLIM5/OBSCN/FZD7/EFNB2/PROX1/NFATC2/SIX4/FHOD3/BMP2/TGFB1/TMOD4/LOX/VEGFA/IGF1/RBM38/GATA6/PI16/NOS1/TMOD1/KDM6B/WT1/GATA4/NPHS1/HOMER1/CD9/SCGB3A1/SRF/MYO18B/MSX1/SYNPO2L/FLNC/MYH11/EDN1/KLF5/RGS2/SIK1/IL4R |
| GOBP_POSITIVE_REGULATION_OF_NEUROGENESIS | GOBP_POSITIVE_REGULATION_OF_NEUROGENESIS | 200 | -0.328371665 | -1.510360738 | 0.001850005 | 0.018862421 | 0.014530047 | 2692 | tags=26%, list=17%, signal=21% | ASPA/ZNF335/PTPRZ1/RELA/HAP1/MAPT/SOX8/SMARCD3/PLXNA2/DBN1/RGS14/SLITRK1/SHANK3/HES1/NPTN/GLI3/ZFYVE27/MAP1B/EEF2K/KALRN/ZNF365/WNT3A/ISLR2/CX3CL1/TTBK1/TNFRSF1B/ARHGDIA/CXCR4/NKX2-2/LRP2/PTPRD/DCT/CUX2/BMP2/TGFB1/POU4F2/NTRK2/VEGFA/OTP/RND2/PLXNA3/VEGFC/SOX11/MAG/WNT3/SRF/CDH4/IL1B/LIF/CLCF1/IL6 |
| GOBP_POSITIVE_REGULATION_OF_ENDOTHELIAL_CELL_MIGRATION | GOBP_POSITIVE_REGULATION_OF_ENDOTHELIAL_CELL_MIGRATION | 97 | -0.399631976 | -1.63001258 | 0.00185017 | 0.018862421 | 0.014530047 | 3569 | tags=34%, list=23%, signal=26% | HDAC7/SP1/KDR/SMOC2/AKT1/MAP3K3/SASH1/FGFBP1/SIRT1/ABL1/MET/ANXA3/HMOX1/RAC1/MAP2K3/NFE2L2/PDGFB/PROX1/BCAR1/TGFB1/FOXP1/VEGFA/GATA3/NOS3/VEGFC/ANGPT4/FGFR1/RHOB/FOXC2/EDN1/THBS1/PTGS2/ZC3H12A |
| GOBP_PROTEIN_LOCALIZATION_TO_CHROMOSOME_CENTROMERIC_REGION | GOBP_PROTEIN_LOCALIZATION_TO_CHROMOSOME_CENTROMERIC_REGION | 18 | 0.659305002 | 1.893589612 | 0.001854309 | 0.018874947 | 0.014539696 | 2931 | tags=56%, list=19%, signal=45% | NDC80/CENPQ/IK/ZWILCH/AURKB/MIS12/CDT1/CTCF/RB1/BUB3 |
| GOBP_EMBRYO_IMPLANTATION | GOBP_EMBRYO_IMPLANTATION | 40 | -0.497313068 | -1.725976158 | 0.001867104 | 0.018975396 | 0.014617075 | 3630 | tags=52%, list=23%, signal=40% | UBE2Q1/TPPP3/PCSK5/MMP9/ACVR1C/SYDE1/ACVR1B/POLR1B/ITGB4/TGFBR2/MMP2/VEGFA/PRDM14/STC2/EPO/GJA1/SCGB1A1/CALCA/STC1/IL1B/LIF |
| GOBP_POSITIVE_REGULATION_OF_BIOMINERALIZATION | GOBP_POSITIVE_REGULATION_OF_BIOMINERALIZATION | 44 | -0.503668143 | -1.784158525 | 0.001874815 | 0.019023949 | 0.014654475 | 3264 | tags=50%, list=21%, signal=40% | TMEM119/FBXO5/WNT10B/ALOX5/ATF4/FBN2/CEBPB/ACVR1/TFAP2A/AMTN/BMP6/AMELX/NELL1/BMP2/TGFB1/GPM6B/SMAD3/ADRB2/OSR1/KL/ACVR2B/TGFB3 |
| GOCC_REPLICATION_FORK | GOCC_REPLICATION_FORK | 54 | 0.471271493 | 1.737631667 | 0.001880376 | 0.019030053 | 0.014659177 | 3051 | tags=44%, list=20%, signal=36% | XPA/PCNA/ZRANB3/RFC1/POLD1/RAD51C/POLH/DONSON/PRIM2/RFC3/PRIM1/SMARCAD1/ETAA1/SMARCAL1/TP53BP1/WDHD1/XRCC3/RFC5/RPA3/RAD18/POLD2/POLA2/CDC5L/RFC4 |
| GOMF_CATION_CATION_ANTIPORTER_ACTIVITY | GOMF_CATION_CATION_ANTIPORTER_ACTIVITY | 22 | -0.624575505 | -1.86051424 | 0.001881357 | 0.019030053 | 0.014659177 | 1980 | tags=50%, list=13%, signal=44% | SLC24A3/SLC9A4/SLC9A1/SLC8A3/SLC9A8/SLC3A2/SLC24A4/SLC24A2/SLC22A4/SLC11A1/SLC8A2 |
| GOMF_METAL_CLUSTER_BINDING | GOMF_METAL_CLUSTER_BINDING | 58 | 0.447463214 | 1.684004565 | 0.001884222 | 0.019030053 | 0.014659177 | 5974 | tags=64%, list=38%, signal=39% | RSAD2/LIAS/ISCA2/POLD1/PRIM2/GLRX3/ACO2/CISD1/NDUFV1/CISD2/NFS1/FECH/FDX1/NTHL1/CDKAL1/NUBP2/XDH/NFU1/ISCU/DDX11/RPS3/GLRX2/NDUFS2/CIAPIN1/DPYD/ELP3/NDUFS8/BRIP1/NDUFS7/CDK5RAP1/ERCC2/NDUFV2/POLA1/IREB2/AIFM3/RFESD/ABAT |
| GOBP_ATP_METABOLIC_PROCESS | GOBP_ATP_METABOLIC_PROCESS | 248 | 0.309689666 | 1.47306464 | 0.001911867 | 0.019277987 | 0.014850166 | 3869 | tags=32%, list=25%, signal=24% | GCK/PRKAA2/MSH2/ENO3/FIGNL1/SPHK2/TREM2/NUPR1/GPD1/COX15/NDUFAF1/DDIT4/NDUFA5/PPIF/NDUFS4/NDUFA6/DLD/FIS1/NMNAT1/SEC13/NDUFB2/NUDT5/NDUFB1/PRKAG1/NUP93/PFKM/NUP43/GCKR/NDUFB4/TMSB4X/NDUFA10/PGAM1/COX7A2L/NUP37/NDUFA9/MYH7/NDUFB6/NUDT2/PKLR/PSEN1/UQCRB/SLC25A33/UQCRQ/NDUFV1/ATP6V1B2/NUP85/UQCRC2/ENPP3/ATP6V1A/COX7A2/SURF1/CTNS/PFKL/COX6C/DNM1L/AK2/PARK7/NUP54/BPGM/SDHA/PGK1/PGAM2/SLC25A23/NDUFA11/FLCN/NDUFB10/DGUOK/VCP/COX6B1/HK3/NDUFC1/ISCU/PGAM4/NDUFAB1/ENPP1/NDUFB3/ALDOC/ENTPD5/NDUFA12 |
| GOBP_TERTIARY_ALCOHOL_METABOLIC_PROCESS | GOBP_TERTIARY_ALCOHOL_METABOLIC_PROCESS | 19 | 0.62528807 | 1.824396721 | 0.001914717 | 0.019277987 | 0.014850166 | 231 | tags=21%, list=1%, signal=21% | AKR1B10/BMP5/CYP11A1/AKR1A1 |
| GOBP_LIPID_HOMEOSTASIS | GOBP_LIPID_HOMEOSTASIS | 136 | 0.366766187 | 1.617849498 | 0.001925451 | 0.019342606 | 0.014899943 | 3844 | tags=35%, list=25%, signal=27% | CYP7A1/FABP4/GPAM/LPL/PRKAA2/CEBPA/CD24/ABCG8/CYP39A1/PNPLA3/PCSK9/COMMD9/TM6SF2/PLA2G12B/POLD1/ORMDL1/DGAT1/ABCB4/ANGPTL3/ACSM1/GCKR/USF1/APOA5/PNPLA4/ACSM3/TMEM97/ENPP7/ORMDL2/ABCA3/NR1H4/HDAC9/ABHD8/SREBF2/SLC25A27/HNF4A/DGAT2/ITGB6/LIMA1/RBP1/ACOX2/NR1D2/NUS1/CES1/RTN4/ACACA/SOAT2/IL18/RCN3 |
| GOMF_POTASSIUM_CHANNEL_ACTIVITY | GOMF_POTASSIUM_CHANNEL_ACTIVITY | 116 | -0.377010694 | -1.590573894 | 0.001927101 | 0.019342606 | 0.014899943 | 4571 | tags=47%, list=29%, signal=34% | KCNAB3/KCNK15/KCND3/KCNH4/KCND2/KCNQ2/KCNQ4/GRIK1/KCNK12/KCNA4/KCNA2/LRRC52/KCNG1/KCNJ13/LRRC55/KCNK10/KCNG3/KCNN2/KCNIP4/KCNJ9/HCN2/KCNC1/ABCC8/KCNK4/KCNJ12/KCNJ1/GRIK4/KCNMB4/KCNJ14/KCNMB1/KCNK18/GRIK3/KCNC2/KCNH6/KCNA10/KCNT1/KCNN3/KCNG2/KCNS1/KCNIP1/GRIK5/KCNS2/KCNJ6/KCNB2/KCNA1/KCNS3/KCNH3/CCT8L2/KCNH5/KCNG4/KCNA5/KCNC3/KCNE4/HCN4/KCNK1 |
| GOBP_MUSCLE_CELL_DIFFERENTIATION | GOBP_MUSCLE_CELL_DIFFERENTIATION | 299 | -0.293080765 | -1.426853996 | 0.001966699 | 0.019709545 | 0.015182602 | 4088 | tags=37%, list=26%, signal=28% | NFATC3/ACTN2/DLL1/SGCZ/ALPK3/TRIM72/RAMP2/IGFBP5/HEY2/NFATC1/TMEM204/NRG1/BARX2/MYOF/MAP2K4/PTBP1/WNT1/BOC/MYOCD/G6PD/CFL2/SUPT6H/KRT19/MYOZ1/LMOD3/AKT1/TMEM119/BHLHA15/NKX2-5/CEACAM5/LMOD1/ACTC1/WNT10B/IL4/SKI/HNRNPU/SOD2/ISL1/EREG/JAM2/BVES/DMPK/TANC1/SIRT1/ABL1/HAMP/ACVR1/HEY1/KAT2A/SMARCD3/MAML1/AKAP13/TBX5/CDK9/HES1/DKK1/RGS4/WDR1/FGF10/MYPN/KEL/SMYD1/NFATC4/RBM24/SLC9A1/WFIKKN2/WNT3A/AVPR1A/CSRP3/PDLIM5/OBSCN/FZD7/EFNB2/PDGFB/PROX1/NFATC2/SIX4/FHOD3/BMP2/TGFB1/TMOD4/LOX/VEGFA/IGF1/RBM38/GATA6/PI16/ANK2/NOS1/TMOD1/KDM6B/FGF9/WT1/ADM/GATA4/NPHS1/HOMER1/CD9/SCGB3A1/SRF/MYO18B/MSX1/SYNPO2L/FLNC/MYH11/EDN1/KLF5/RGS2/SIK1/IL4R |
| GOBP_POSITIVE_REGULATION_OF_CELL_JUNCTION_ASSEMBLY | GOBP_POSITIVE_REGULATION_OF_CELL_JUNCTION_ASSEMBLY | 89 | -0.414406019 | -1.654240279 | 0.001977039 | 0.019782591 | 0.01523887 | 2959 | tags=35%, list=19%, signal=28% | OXTR/MYOC/NTRK1/COL16A1/ABL1/GHRL/LINGO2/CLSTN2/CAV1/CBLN1/SLITRK1/EEF2K/RAC1/AMIGO3/LRRTM2/PTPRD/NLGN3/EPHB1/CUX2/TPBG/NTRK2/VEGFA/IL1RAP/NLGN1/SEMA4A/FLRT3/SMAD3/SLITRK2/SDC4/EPHA2/SLITRK3 |
| GOMF_ACYL_COA_BINDING | GOMF_ACYL_COA_BINDING | 21 | 0.608112012 | 1.8252855 | 0.001989473 | 0.019876336 | 0.015311084 | 4228 | tags=71%, list=27%, signal=52% | ACOT12/ACBD5/DBI/PNPLA3/PANK1/ACADL/ACBD4/SCP2/PANK3/ACBD6/HMGCL/ACOT11/SOAT2/ACOT7/ACAD9 |
| GOBP_POTASSIUM_ION_TRANSPORT | GOBP_POTASSIUM_ION_TRANSPORT | 218 | -0.32079421 | -1.508351361 | 0.001998291 | 0.019933722 | 0.015355289 | 3629 | tags=34%, list=23%, signal=27% | ATP4B/KCNJ13/LRRC55/KCNK10/KCNG3/KCNN2/KCNIP4/KCNJ9/ATP1B1/HCN2/NPPA/ATP1A1/KCNC1/ATF4/MTNR1B/ABCC8/DRD3/KCNK4/DPP10/KCNJ12/WWP2/KCNJ1/KCNMB4/SLC12A9/WNK4/KCNJ14/WNK2/KCNMB1/VIP/KCNK18/CAV1/CASQ2/ATP1B3/SLC12A2/RGS4/SLC24A3/KEL/SLC9A4/KCNC2/SLC9A1/KCNH6/ATP4A/KCNA10/KCNT1/KCNN3/KCNG2/KCNS1/KCNIP1/SLC9A8/NETO2/KCNS2/KCNJ6/KCNB2/ATP1B2/KCNA1/KCNS3/KCNH3/ATP1A2/CCT8L2/KCNH5/DPP6/KCNG4/KCNA5/FHL1/ANK2/SLC24A4/KCNC3/SLC24A2/NOS1/KCNE4/NOS1AP/HCN4/ADCYAP1/EDN3/KCNK1 |
| GOBP_ANTIGEN_PROCESSING_AND_PRESENTATION_OF_PEPTIDE_OR_POLYSACCHARIDE_ANTIGEN_VIA_MHC_CLASS_II | GOBP_ANTIGEN_PROCESSING_AND_PRESENTATION_OF_PEPTIDE_OR_POLYSACCHARIDE_ANTIGEN_VIA_MHC_CLASS_II | 98 | 0.396496521 | 1.662033469 | 0.002021113 | 0.020104101 | 0.015486535 | 5285 | tags=58%, list=34%, signal=39% | TREM2/KIF22/AP1S1/RACGAP1/HLA-DRB3/DYNC1I2/SEC13/HLA-DMA/HLA-DMB/KIF3A/SEC24A/SEC24D/SEC23A/KIFAP3/CLTA/DCTN5/ACTR10/AP2B1/KIF3B/SEC31A/KIF11/DYNC1LI1/CLTC/DYNLL1/DYNC1H1/HLA-DOA/SAR1B/FCGR2B/CENPE/HLA-DPA1/SEC24C/DCTN4/DCTN6/HLA-DQB1/KIF2A/SEC24B/KIF2C/IFI30/CTSF/AP1B1/PYCARD/DYNLL2/DCTN3/KLC1/ACTR1A/CTSD/CTSS/HLA-DQA1/AP2S1/AP2M1/CANX/CD74/HLA-DRA/ARF1/AP1S2/FCER1G/KIF18A |
| GOBP_CELL_DIFFERENTIATION_INVOLVED_IN_KIDNEY_DEVELOPMENT | GOBP_CELL_DIFFERENTIATION_INVOLVED_IN_KIDNEY_DEVELOPMENT | 57 | -0.447017638 | -1.674402286 | 0.002021572 | 0.020104101 | 0.015486535 | 3211 | tags=54%, list=21%, signal=43% | PROM1/GDNF/NPHS2/BASP1/FOXJ1/POU3F3/MMP9/LHX1/TCF21/PTCH1/YAP1/CD34/WWTR1/ADIPOQ/GLIS2/MAGI2/HES1/GLI3/ASXL1/CITED1/PDGFB/ACTA2/JAG1/GATA3/PODXL/WT1/GPR4/NPHS1/FOXC2/OSR1/LIF |
| GOCC_RECEPTOR_COMPLEX | GOCC_RECEPTOR_COMPLEX | 389 | -0.285169719 | -1.417064297 | 0.002053364 | 0.020369789 | 0.015691199 | 3151 | tags=28%, list=20%, signal=22% | ITGA11/CHRNA7/ACVR1C/GABRG3/EGFR/EPHA8/ITGA8/CHRNB2/CHRNA9/MST1R/GABBR2/GRIN2D/ACVR1B/LRP1B/NTRK1/CHRNA3/ADCYAP1R1/INSR/GRIA2/SHANK1/HTR3A/TRPV3/TRIL/CHRNA4/GRIK4/CACNG5/CD8B/CSF2RA/ACVR1/CHRNA6/CD14/LMTK2/ITGAX/PTPRB/TRAF4/MET/PKD1L3/VDR/CNIH3/PLXNA2/ARNTL2/SHANK3/GABRA5/IL23R/GRIK3/PEX5L/ITGB4/KCTD16/GPR61/IL18R1/HTR3B/GRM7/ROS1/TNFRSF1B/PLP1/TFRC/LRP2/GRIK5/GABRB2/TGFBR2/FLT3/EPHB1/AHRR/NTRK3/BMP2/GABRR1/NTRK2/VWC2/KCTD8/ADRB3/GABRD/CEACAM1/NLGN1/LRP5/TGFBR3/TRPC1/GPR63/ITGA10/GPR37L1/SMAD3/LEPR/CACNG3/EBI3/GABRA2/CSF2RB/NOTCH3/OSMR/PLXNA3/CSF3R/GFRA3/ADRB2/CACNG7/TYRO3/FGFR1/GABRB1/CACNG2/LDLR/CPT1C/ITGB8/TNFRSF1A/ACVR2B/IL18RAP/RAMP1/GPRC5A/IL4R/EPHA2/IL6 |
| GOBP_MAMMARY_GLAND_DEVELOPMENT | GOBP_MAMMARY_GLAND_DEVELOPMENT | 125 | -0.36598164 | -1.563598001 | 0.002057529 | 0.020369789 | 0.015691199 | 2959 | tags=28%, list=19%, signal=23% | OXTR/CSN3/PRL/TNFSF11/BSX/HOXB9/PTCH1/NCOA1/CEBPB/UMPS/HOXA9/HOXA5/CAV1/WNT7B/CCL11/GLI3/FGF10/KALRN/WNT3A/CSF1/TGFBR2/DHODH/VEGFA/GATA3/LRP5/BCL2L11/CSN2/ORAI1/WNT3/MSX1/IRS2/ELF3/TGFB3/EPHA2/SOCS2 |
| GOBP_NEGATIVE_REGULATION_OF_RESPONSE_TO_WOUNDING | GOBP_NEGATIVE_REGULATION_OF_RESPONSE_TO_WOUNDING | 82 | -0.405410519 | -1.606046591 | 0.002057713 | 0.020369789 | 0.015691199 | 913 | tags=34%, list=6%, signal=32% | MYOZ1/PTPRS/FGG/CLDN19/SERPING1/FGA/ALOX5/C1QTNF1/CD34/SLC12A2/KLK8/KIAA0319/SIGLEC10/PDGFB/RGMA/CEACAM1/SMAD3/PLAT/GJA1/NOS3/CD9/PLAUR/SERPINB2/TNR/THBD/EDN1/THBS1/SERPINE1 |
| GOBP_RECOMBINATIONAL_REPAIR | GOBP_RECOMBINATIONAL_REPAIR | 99 | 0.38043219 | 1.601464528 | 0.002073456 | 0.02049434 | 0.015787143 | 5339 | tags=55%, list=34%, signal=36% | GINS2/FIGNL1/MCM5/BRCA1/CHEK1/RAD51AP1/FEN1/SMC6/MCM6/MCM2/GEN1/EXD2/PSMD14/RAD51C/NSMCE2/WDR48/TP53BP1/ERCC6/MAD2L2/XRCC3/ACTR2/RPA3/SAMHD1/RECQL/USP51/RMI1/RAD52/MAGEF1/ERCC4/XRCC1/ATM/NSMCE1/XRCC2/MCM8/MCM4/FANCM/HELQ/RPA1/RAD50/RAD54B/RFWD3/RECQL4/RAD54L/MCM9/MCM3/NUCKS1/MMS19/UBE2N/SMC5/NBN/MUS81/RAD21/POLL/PALB2 |
| GOBP_NEGATIVE_REGULATION_OF_VASCULATURE_DEVELOPMENT | GOBP_NEGATIVE_REGULATION_OF_VASCULATURE_DEVELOPMENT | 87 | -0.405747781 | -1.61506158 | 0.002083521 | 0.020546132 | 0.015827039 | 3016 | tags=32%, list=19%, signal=26% | FOXJ2/ALOX5/PRL/IL17F/STAB1/GHRL/ANGPT2/SEMA6A/SPRED1/HOXA5/TGFB2/SLC12A2/KLK3/SULF1/KLF2/COL4A3/SPINK5/SEMA4A/ATP2B4/SPRY2/GPR4/ANGPT4/THBS1/KLF4/FOXC1/SERPINE1/ADAMTS1/EPHA2 |
| GOBP_FOREBRAIN_DEVELOPMENT | GOBP_FOREBRAIN_DEVELOPMENT | 334 | -0.29250148 | -1.436865517 | 0.002085033 | 0.020546132 | 0.015827039 | 3114 | tags=28%, list=20%, signal=23% | POU3F3/PROP1/SSTR3/LHX1/SLC32A1/SKI/KIF1A/OXTR/CHRNB2/NDEL1/DCLK1/NEUROG3/FGF8/SOX2/ARL13B/OTX1/ISL1/PHACTR1/SIX3/ZNF335/NCOA1/CCDC141/SIN3A/HAP1/NKX2-1/SCN5A/KAT2A/NOG/CCKAR/ANXA3/HPRT1/ARX/TH/SRD5A1/SOX1/SHANK3/ZMIZ1/WNT7B/RAX/HES1/CHD5/GLI3/FGF10/TOX/KCNC2/NPY/SLC38A2/TMEM108/WNT3A/AVPR1A/ATOH1/AKNA/PAX5/CXCR4/LRP2/TACC1/POU3F2/PROX1/GHRH/SLC8A3/PLCB1/SEMA3A/DCT/C21orf91/TSKU/APLP1/MAS1/BMP2/ATP1B2/NTRK2/KCNA1/ATP1A2/DNAH5/HES5/OTP/LHX8/NDST1/BTG2/POU4F1/ATP2B4/ALDH1A3/LHX5/PLXNA3/KDM6B/PTCHD1/TYRO3/ADCYAP1/SRF/MSX1/BCL2A1/SOX3/LPAR1/PPARGC1A/TNR/NR4A2 |
| GOBP_RESPONSE_TO_TYPE_I_INTERFERON | GOBP_RESPONSE_TO_TYPE_I_INTERFERON | 89 | 0.40709069 | 1.692256726 | 0.002100361 | 0.020665766 | 0.015919196 | 821 | tags=18%, list=5%, signal=17% | OAS1/IFIT2/WNT5A/IFI27/IFI6/IFIT3/USP18/ISG15/OAS2/RSAD2/BST2/IFIT1/OASL/RNASEL/OAS3/IP6K2 |
| GOCC_VESICLE_COAT | GOCC_VESICLE_COAT | 48 | 0.500072591 | 1.784441081 | 0.002105361 | 0.020683576 | 0.015932915 | 4776 | tags=56%, list=31%, signal=39% | KLHL12/AP1S1/SEC13/COPZ1/SEC23B/SEC24A/SEC24D/SEC23A/CLTA/COPB2/CLINT1/COPZ2/AP2B1/AFTPH/SEC31A/CLTC/SAR1B/NECAP2/COPB1/SAR1A/SEC24C/SEC31B/SEC24B/CLTCL1/AP1G2/AP2S1/AP2M1 |
| GOBP_PROTEIN_K11_LINKED_UBIQUITINATION | GOBP_PROTEIN_K11_LINKED_UBIQUITINATION | 27 | 0.560957392 | 1.792636922 | 0.002109784 | 0.020695672 | 0.015942233 | 4836 | tags=59%, list=31%, signal=41% | ANAPC7/UBE2T/CDC23/FZR1/RNF26/ANAPC11/UBE2H/ANAPC5/ANAPC2/CDC16/ANAPC4/UBE2E3/ANAPC10/CDC27/CDC26/ANAPC13 |
| GOBP_REGULATION_OF_LEUKOCYTE_CHEMOTAXIS | GOBP_REGULATION_OF_LEUKOCYTE_CHEMOTAXIS | 103 | -0.387875939 | -1.592097574 | 0.002116076 | 0.020726042 | 0.015965627 | 1804 | tags=23%, list=12%, signal=21% | RAC1/CSF1/PGF/FPR2/DUSP1/AKIRIN1/CCR7/RIN3/NOD2/MTUS1/VEGFA/CCL21/LBP/CXCL13/VEGFC/C5AR1/CCL3/CCL7/EDN3/EDN1/THBS1/CCL2/SERPINE1/IL6 |
| GOBP_CELLULAR_RESPONSE_TO_CADMIUM_ION | GOBP_CELLULAR_RESPONSE_TO_CADMIUM_ION | 36 | -0.525517284 | -1.755200258 | 0.002128909 | 0.02081777 | 0.016036287 | 3400 | tags=50%, list=22%, signal=39% | STAR/AKT1/MT1H/MMP9/EGFR/MT1G/MT3/MT2A/HMOX1/MT1E/MT1F/MT1X/CYP1A2/JUN/MT1M/MT1A/MT1B/FOS |
| GOBP_HISTONE_H3_K14_ACETYLATION | GOBP_HISTONE_H3_K14_ACETYLATION | 11 | -0.734428491 | -1.774105569 | 0.002131863 | 0.02081777 | 0.016036287 | 2831 | tags=64%, list=18%, signal=52% | BRD1/SIRT1/PIWIL2/KAT2A/WBP2/GATA3/BRPF1 |
| GOBP_ORGANELLE_DISASSEMBLY | GOBP_ORGANELLE_DISASSEMBLY | 91 | 0.390468755 | 1.624404932 | 0.002148005 | 0.02093938 | 0.016129965 | 4537 | tags=47%, list=29%, signal=34% | SPATA18/GFM2/WIPI1/SPAST/ATG5/VRK1/MCTS1/FIS1/VPS13C/GOLGA2/OPTN/HDAC6/USP30/FUNDC1/FBXO7/PHB2/MTIF3/UFC1/GABARAPL2/CISD2/GBF1/DNM1L/SREBF2/PARK7/ATG7/UBA5/ATG3/CTSK/HTRA2/DDRGK1/VCP/MAP1LC3A/BECN1/STX5/HAX1/UFM1/ATP13A2/FBXW7/CTTN/CSNK2A2/BNIP3L/SREBF1/KLC1 |
| GOCC_VOLTAGE_GATED_SODIUM_CHANNEL_COMPLEX | GOCC_VOLTAGE_GATED_SODIUM_CHANNEL_COMPLEX | 17 | -0.661576729 | -1.812961399 | 0.002151621 | 0.02093938 | 0.016129965 | 3398 | tags=59%, list=22%, signal=46% | SCN10A/SCN2A/CACNA1I/SCN5A/SCN2B/CACNA1G/SCN3B/SCN1A/SCN9A/SCN7A |
| GOBP_PATTERN_SPECIFICATION_PROCESS | GOBP_PATTERN_SPECIFICATION_PROCESS | 384 | -0.279035025 | -1.380453986 | 0.002154005 | 0.02093938 | 0.016129965 | 3779 | tags=30%, list=24%, signal=24% | GDNF/SFRP1/CDX2/APC2/INTU/DNAI2/GRHL3/DMRT2/WNT1/BASP1/DSCAML1/PITX2/IFT57/C2CD3/LHX3/MEIS2/TBX22/GBX2/PCSK5/FOXJ1/FKBP8/EGR2/NKX2-5/HELT/HOXD9/LHX1/HOXA10/SKI/HOXC5/FGF8/HOXB9/PTCH1/ARL13B/FOXA2/OTX1/ISL1/SIX3/CELSR2/HOXD10/CDX4/SEMA3C/NKX2-1/ACVR1/DBX1/HEY1/KAT2A/NOG/PCDH8/SMARCD3/FZD5/HOXA3/TCF15/HOXA11/HOXA9/HOXA5/ARC/TBX5/HOXC9/PLXNA2/HES4/SOX1/WNT7B/RAX/HES1/DKK1/GLI3/NRARP/FGF10/SPRY1/DLL3/WNT3A/CITED1/NKX2-2/LRP2/NKX3-1/TGFBR2/HOXD8/SCMH1/PKD1L1/HES2/SEMA3A/SP8/HIPK2/LMX1B/BMP2/NTF4/BCOR/DNAH5/HES5/HAND1/SIM2/LRP5/VANGL2/BTG2/IRX2/SMAD3/HOXB1/ALX4/CHSY1/WT1/GATA4/WNT3/CHRD/FOXC2/SRF/HOXD13/OSR1/MSX1/ACVR2B/FST/STC1/IRX3/DAND5/LRP4/SOX17/EDN1/FOXC1 |
| GOBP_ACETYL_COA_METABOLIC_PROCESS | GOBP_ACETYL_COA_METABOLIC_PROCESS | 36 | 0.530226817 | 1.787565852 | 0.002175638 | 0.021089206 | 0.016245379 | 3301 | tags=44%, list=21%, signal=35% | ACOT12/PDP2/HMGCS1/MVK/ACSS2/PMVK/MVD/DLD/NUDT7/PDHA1/FASN/PPCS/DIP2A/PIPOX/PDHB/ACAT1 |
| GOMF_MANNOSYLTRANSFERASE_ACTIVITY | GOMF_MANNOSYLTRANSFERASE_ACTIVITY | 23 | 0.597386835 | 1.820727862 | 0.002175922 | 0.021089206 | 0.016245379 | 2871 | tags=43%, list=18%, signal=36% | ALG1L/ALG11/PIGB/DPY19L4/TMTC4/ALG1/SDF2L1/TMTC3/ALG12/PIGV |
| GOBP_MITOTIC_SPINDLE_ASSEMBLY | GOBP_MITOTIC_SPINDLE_ASSEMBLY | 53 | 0.463696918 | 1.700199828 | 0.002180115 | 0.021098307 | 0.016252389 | 4069 | tags=45%, list=26%, signal=34% | RACGAP1/RCC1/GOLGA2/CHMP5/AURKB/KIFC1/STAG1/CHMP2A/NEK2/CLASP2/PRC1/KIF3B/KIF11/CEP192/CHEK2/CDC20/VPS4B/STAG2/CHMP1A/DRG1/CEP97/BCCIP/CHMP2B/KIF2A |
| GOBP_NEGATIVE_REGULATION_OF_AUTOPHAGOSOME_ASSEMBLY | GOBP_NEGATIVE_REGULATION_OF_AUTOPHAGOSOME_ASSEMBLY | 15 | 0.667038672 | 1.850530299 | 0.002185911 | 0.021108936 | 0.016260577 | 1661 | tags=40%, list=11%, signal=36% | CHMP4A/NUPR1/SCFD1/MTM1/LRRK2/FEZ2 |
| GOBP_INTERLEUKIN_7_MEDIATED_SIGNALING_PATHWAY | GOBP_INTERLEUKIN_7_MEDIATED_SIGNALING_PATHWAY | 17 | -0.660669644 | -1.810475656 | 0.0021884 | 0.021108936 | 0.016260577 | 686 | tags=29%, list=4%, signal=28% | JAK3/IRS2/CISH/SOCS2/SOCS1 |
| GOBP_T_CELL_RECEPTOR_SIGNALING_PATHWAY | GOBP_T_CELL_RECEPTOR_SIGNALING_PATHWAY | 184 | 0.331413755 | 1.520464698 | 0.00219098 | 0.021108936 | 0.016260577 | 4491 | tags=44%, list=29%, signal=32% | CD3G/BTN3A2/BTN3A1/PSMD10/CD160/SH2D1A/LGALS3/HLA-DRB3/PSMB9/PSMA2/CD3E/PIK3R1/PSMB7/PSME2/CD3D/PSMD14/PLCG1/PHPT1/THY1/PSMA4/PSMD4/TRAT1/PTPRC/CD300A/IKBKB/PSMD7/PSMD1/LCK/EIF2B3/ERMAP/PIK3R2/PSMA3/MAP3K7/PSMD13/CD28/SKP1/BTRC/PSEN1/INPP5D/CD247/CD226/PSMD11/PAK1/GRAP2/PAWR/RFTN1/NCK1/BTN2A2/PSMA1/PSMB10/PSMC6/PSMB5/SKAP1/HLA-A/PSMC4/KCNN4/CACNB3/PSMC3/PSME1/ZAP70/PSMB1/TXK/PSMD2/HRAS/HLA-DPA1/PRAM1/PSMA5/CARD11/BTNL2/HLA-DQB1/PIK3CB/RPS3/LILRB4/PSMC5/CUL1/WNK1/PDPK1/PRKD2/PSMB8/RBCK1/EIF2B1 |
| GOBP_NEGATIVE_REGULATION_OF_LEUKOCYTE_CELL_CELL_ADHESION | GOBP_NEGATIVE_REGULATION_OF_LEUKOCYTE_CELL_CELL_ADHESION | 117 | -0.369957856 | -1.560929574 | 0.002197171 | 0.021137177 | 0.016282332 | 1036 | tags=15%, list=7%, signal=14% | LILRB2/CCL21/CEACAM1/IRF1/JAK3/CD274/DTX1/ARG2/SCGB1A1/IL10/PELI1/SDC4/KLF4/BCL6/IL4R/SOCS1/ZC3H12A |
| GOBP_SENSORY_PERCEPTION_OF_PAIN | GOBP_SENSORY_PERCEPTION_OF_PAIN | 89 | -0.411713545 | -1.643492369 | 0.002207366 | 0.021203798 | 0.016333651 | 4355 | tags=44%, list=28%, signal=32% | IAPP/NPY2R/KCND2/SMR3B/NDN/KCNA2/CCK/GIP/SMR3A/ITGA2/PTGES/SCN10A/HOXD1/CHRNB2/NTSR1/GRIN2D/NTRK1/KCNK4/CHRNA4/P2RY1/VIP/TRPA1/SLC9A1/SCN3B/CXCR4/EPHB1/SCN1A/KCNA1/SCN9A/PENK/TAC1/CCL3/PRDM12/ADCYAP1/IL10/CALCA/EDN1/PROK2/CCL2 |
| GOBP_TRANSMEMBRANE_RECEPTOR_PROTEIN_SERINE_THREONINE_KINASE_SIGNALING_PATHWAY | GOBP_TRANSMEMBRANE_RECEPTOR_PROTEIN_SERINE_THREONINE_KINASE_SIGNALING_PATHWAY | 322 | -0.292946231 | -1.432687005 | 0.002222041 | 0.021311758 | 0.016416814 | 2990 | tags=26%, list=19%, signal=22% | BAMBI/SKI/SPINT3/FKBP1A/DDX5/ACVR1B/PPM1L/ZBTB7A/IL17F/WWTR1/FBN2/SIRT1/FAM89B/ABL1/ZC3H3/FURIN/MSTN/CRIM1/NKX2-1/SPRED1/ACVR1/NOG/ID1/CAV1/MAGI2/CDKN2B/HTRA4/TGFB2/ZMIZ1/HES1/DKK1/KIAA0319/FGF10/RNF165/PRDM16/SPRY1/WFIKKN2/BMP6/RGMB/LRRC32/CITED1/LRP2/PMEPA1/TGFBR2/BMP15/RBPMS/TGIF2/TFAP2B/HIPK2/SULF1/BMP2/TGFB1/LOX/VWC2/SPRED2/RGMA/GOT1/HES5/TGFBR3/GDF3/CHRDL1/SMAD3/SPRY2/HOXA13/LATS2/GATA4/LTBP4/GREM2/SOX11/CHRD/ITGB8/MSX1/LRG1/JUN/GDF5/ACVR2B/FST/DAND5/INHBB/THBS1/TGFB3/HIVEP1/FOS/EGR1 |
| GOBP_POSITIVE_REGULATION_OF_CHEMOTAXIS | GOBP_POSITIVE_REGULATION_OF_CHEMOTAXIS | 132 | -0.368519603 | -1.591595305 | 0.002225179 | 0.021311758 | 0.016416814 | 1804 | tags=23%, list=12%, signal=21% | RAC1/CSF1/PGF/FPR2/CXCR4/PDGFB/AKIRIN1/CCR7/AZU1/F3/NTRK3/TPBG/TGFB1/VEGFA/CCL21/LBP/CDH13/SMAD3/CCL26/CXCL13/VEGFC/C5AR1/CCL3/CCL7/FGFR1/EDN3/LPAR1/EDN1/THBS1/SERPINE1/IL6 |
| GOBP_REGULATION_OF_TRANSPORTER_ACTIVITY | GOBP_REGULATION_OF_TRANSPORTER_ACTIVITY | 253 | -0.306447064 | -1.454642524 | 0.00223297 | 0.021354836 | 0.016449998 | 2934 | tags=27%, list=19%, signal=22% | IFNG/FKBP1A/NTSR1/MTNR1B/DRD3/PIRT/GRIA2/ACTB/SHANK1/CACNA2D1/HTR3A/ADIPOQ/HAP1/WWP2/CACNG5/WNK4/REM1/PTPN3/JPH2/WNK2/RYR2/ARC/CAV1/SCN2B/CASQ2/CNIH3/ATP1B3/HECW2/SHANK3/KCNC2/SLC9A1/SCN3B/SYNGR3/SLC9A3R1/FXYD5/KCNS1/PDE4B/NLGN3/NETO2/KCNS2/GSG1L/ATP1B2/HSPA2/KCNA1/ATP1A2/SGK1/NLGN1/PDE4D/FHL1/ANK2/ATP2A1/CACNG3/NOS1/EPO/GJA1/KCNE4/HPCA/ADRB2/CACNG7/HOMER1/NOS1AP/CACNG2/OSR1/GEM/PPARGC1A/FGF14/PIM1/CCL2 |
| GOBP_INTRACILIARY_TRANSPORT_INVOLVED_IN_CILIUM_ASSEMBLY | GOBP_INTRACILIARY_TRANSPORT_INVOLVED_IN_CILIUM_ASSEMBLY | 32 | 0.535983579 | 1.749018253 | 0.002241086 | 0.021400881 | 0.016485467 | 3966 | tags=50%, list=25%, signal=37% | TRIP11/IFT80/IFT52/CLUAP1/KIF3A/KIFAP3/TTC30B/SSX2IP/KIF3B/DYNC2LI1/DYNLL1/IFT172/IFT20/IFT74/TRAF3IP1/IFT122 |
| GOMF_SNAP_RECEPTOR_ACTIVITY | GOMF_SNAP_RECEPTOR_ACTIVITY | 35 | 0.533844572 | 1.789028938 | 0.002251311 | 0.021466911 | 0.016536331 | 3957 | tags=60%, list=25%, signal=45% | GOSR1/STX18/STX17/STX8/VTI1B/STX7/SNAP47/BET1/VAMP8/VAMP3/GOSR2/STX2/USE1/VAMP1/STX10/SNAP23/STX4/STX16/STX19/STX5/YKT6 |
| GOBP_RESPONSE_TO_ESTROGEN | GOBP_RESPONSE_TO_ESTROGEN | 68 | -0.433744485 | -1.662570622 | 0.002258171 | 0.021500706 | 0.016562364 | 2560 | tags=31%, list=16%, signal=26% | GHRL/MSTN/CAV1/HMOX1/SRD5A1/GLI3/CITED1/LDHA/TGFBR2/TPH2/WBP2/GSTM3/GATA3/GATA6/EPO/CYP27B1/CITED4/SERPINB9/TGFB3/IL4R/IGFBP2 |
| GOBP_ENDOTHELIAL_CELL_DEVELOPMENT | GOBP_ENDOTHELIAL_CELL_DEVELOPMENT | 60 | -0.444505446 | -1.668799993 | 0.002275584 | 0.021634733 | 0.016665607 | 1307 | tags=27%, list=8%, signal=25% | MET/WNT7B/VCL/PLCB1/COL15A1/GSTM3/VEGFA/RAPGEF1/PDE4D/HOXA13/MYADM/ICAM1/S1PR2/TNFRSF1A/STC1/IL1B |
| GOBP_REGULATION_OF_TRANSMEMBRANE_RECEPTOR_PROTEIN_SERINE_THREONINE_KINASE_SIGNALING_PATHWAY | GOBP_REGULATION_OF_TRANSMEMBRANE_RECEPTOR_PROTEIN_SERINE_THREONINE_KINASE_SIGNALING_PATHWAY | 225 | -0.316307165 | -1.479986275 | 0.002294158 | 0.021779384 | 0.016777034 | 2990 | tags=31%, list=19%, signal=25% | BAMBI/SKI/SPINT3/FKBP1A/ACVR1B/ZBTB7A/IL17F/FBN2/SIRT1/FAM89B/ABL1/ZC3H3/MSTN/CRIM1/NKX2-1/SPRED1/ACVR1/NOG/CAV1/MAGI2/CDKN2B/HTRA4/TGFB2/HES1/DKK1/KIAA0319/FGF10/RNF165/PRDM16/SPRY1/WFIKKN2/BMP6/CITED1/LRP2/PMEPA1/TGFBR2/BMP15/RBPMS/TFAP2B/HIPK2/SULF1/BMP2/TGFB1/LOX/VWC2/SPRED2/GOT1/HES5/TGFBR3/GDF3/CHRDL1/SMAD3/SPRY2/HOXA13/LATS2/GATA4/LTBP4/GREM2/SOX11/CHRD/MSX1/LRG1/GDF5/ACVR2B/FST/DAND5/INHBB/THBS1/TGFB3 |
| GOMF_POTASSIUM_ION_TRANSMEMBRANE_TRANSPORTER_ACTIVITY | GOMF_POTASSIUM_ION_TRANSMEMBRANE_TRANSPORTER_ACTIVITY | 146 | -0.354042249 | -1.549020195 | 0.002303335 | 0.02183454 | 0.016819522 | 3762 | tags=43%, list=24%, signal=33% | KCND2/KCNQ2/KCNQ4/GRIK1/KCNK12/KCNA4/KCNA2/LRRC52/KCNG1/ATP4B/KCNJ13/LRRC55/KCNK10/KCNG3/KCNN2/KCNIP4/KCNJ9/HCN2/ATP1A1/KCNC1/ABCC8/KCNK4/KCNJ12/KCNJ1/GRIK4/KCNMB4/SLC12A9/KCNJ14/KCNMB1/KCNK18/SLC12A2/SLC24A3/GRIK3/SLC9A4/KCNC2/SLC9A1/KCNH6/ATP4A/KCNA10/KCNT1/KCNN3/KCNG2/KCNS1/KCNIP1/GRIK5/SLC9A8/KCNS2/KCNJ6/KCNB2/KCNA1/KCNS3/KCNH3/ATP1A2/CCT8L2/KCNH5/KCNG4/KCNA5/SLC24A4/KCNC3/SLC24A2/KCNE4/HCN4/KCNK1 |
| GOBP_AMINO_ACID_TRANSPORT | GOBP_AMINO_ACID_TRANSPORT | 143 | -0.358305353 | -1.556610239 | 0.002308026 | 0.02184707 | 0.016829174 | 2910 | tags=31%, list=19%, signal=25% | NTSR1/SLC7A5/SLC43A2/GRM2/SLC38A1/STX1A/SLC6A20/SLC38A8/PPFIA4/SLC12A2/RGS4/SLC25A12/SLC6A6/SLC38A2/SLC25A29/AVPR1A/GRM7/SLC9A3R1/SLC38A3/APBA1/SLC6A17/SLC6A18/PDPN/SLC3A2/SV2A/LEP/SLC36A2/SLC6A11/NTRK2/SLC25A2/ATP1A2/SLC1A4/SLC3A1/PPFIA2/GJA1/PER2/TRH/SLC25A18/CPLX1/SLC22A4/SLC11A1/SLC7A1/SLC7A2/RGS2 |
| GOBP_AMINOGLYCAN_BIOSYNTHETIC_PROCESS | GOBP_AMINOGLYCAN_BIOSYNTHETIC_PROCESS | 111 | -0.376427772 | -1.57229689 | 0.002336039 | 0.022079995 | 0.0170086 | 2830 | tags=32%, list=18%, signal=26% | HAS3/NFKB1/ACAN/DSE/NDST2/CSPG4/B3GALT5/ST3GAL1/B3GNT4/B3GNT7/CHST14/B3GALT6/CHPF2/DSEL/PDGFB/CSGALNACT1/B4GALT5/TGFB1/ST3GAL6/HS3ST6/HS3ST3B1/CHSY3/UST/NDST1/GPC5/CHST6/CHSY1/VCAN/CHST3/B3GALT1/B4GALT1/HAS2/HAS1/IL1B/SDC4 |
| GOBP_BRANCHING_INVOLVED_IN_BLOOD_VESSEL_MORPHOGENESIS | GOBP_BRANCHING_INVOLVED_IN_BLOOD_VESSEL_MORPHOGENESIS | 32 | -0.537176764 | -1.750013783 | 0.002351962 | 0.022198142 | 0.017099611 | 4854 | tags=66%, list=31%, signal=45% | SHH/NRP1/EDNRA/PLXND1/SFRP2/SEMA3E/KDR/SIRT6/GBX2/COL4A1/FGF8/ABL1/ACVR1/NRARP/RBM15/NFATC4/TGFBR2/VEGFA/FOXC2/SRF/EDN1 |
| GOBP_POSITIVE_REGULATION_OF_REGULATORY_T_CELL_DIFFERENTIATION | GOBP_POSITIVE_REGULATION_OF_REGULATORY_T_CELL_DIFFERENTIATION | 15 | -0.681449748 | -1.799235758 | 0.002378239 | 0.022370203 | 0.017232153 | 1036 | tags=27%, list=7%, signal=25% | LILRB2/DUSP10/BCL6/SOCS1 |
| GOBP_T_CELL_DIFFERENTIATION_INVOLVED_IN_IMMUNE_RESPONSE | GOBP_T_CELL_DIFFERENTIATION_INVOLVED_IN_IMMUNE_RESPONSE | 70 | -0.439334436 | -1.694421918 | 0.002379364 | 0.022370203 | 0.017232153 | 1734 | tags=20%, list=11%, signal=18% | STAT3/IL18R1/IRF4/RELB/FOXP1/GATA3/SEMA4A/JAK3/NFKBIZ/BCL6/IL4R/BCL3/ZC3H12A/IL6 |
| GOBP_RECEPTOR_SIGNALING_PATHWAY_VIA_STAT | GOBP_RECEPTOR_SIGNALING_PATHWAY_VIA_STAT | 152 | -0.354621685 | -1.566139732 | 0.002380564 | 0.022370203 | 0.017232153 | 1816 | tags=16%, list=12%, signal=15% | IFNA14/STAT3/IL24/IFNA8/CTF1/PTPRD/FLT3/LEP/IGF1/HES5/JAK3/THPO/EPO/IL20/TNFRSF1A/IL10/OSM/LIF/CLCF1/SOCS3/BCL3/CCL2/SOCS2/SOCS1/IL6 |
| GOMF_NUCLEOTIDYLTRANSFERASE_ACTIVITY | GOMF_NUCLEOTIDYLTRANSFERASE_ACTIVITY | 100 | 0.385626317 | 1.62794972 | 0.002383993 | 0.022370203 | 0.017232153 | 2372 | tags=28%, list=15%, signal=24% | OAS1/CMAS/OAS2/OAS3/MED21/GALT/POLE2/POLR2K/POLD1/POLB/NMNAT1/POLH/NUDT5/POLG2/POLR2E/PAPSS1/POLR2G/PRIM1/NMNAT3/POLK/POLR2L/GMPPA/POLI/POLR2B/FPGT/UGP2/PAPSS2/COASY |
| GOBP_MESODERM_DEVELOPMENT | GOBP_MESODERM_DEVELOPMENT | 106 | -0.376357574 | -1.557968039 | 0.002391388 | 0.022407166 | 0.017260626 | 900 | tags=30%, list=6%, signal=29% | LHX1/ITGA8/SECTM1/FGF8/TLX2/YAP1/ACVR1/NOG/TCF15/HOXA11/DKK1/ITGB4/DLL3/WNT3A/PUS7/VEGFA/HAND1/SMAD3/POU4F1/GJA1/KDM6B/WNT3/TEAD2/FOXC2/SRF/OSR1/TRIM15/IRX3/DAND5/KLF4/FOXC1/EPHA2 |
| GOBP_OVULATION_CYCLE | GOBP_OVULATION_CYCLE | 62 | -0.450524887 | -1.700153577 | 0.002399495 | 0.022429421 | 0.017277769 | 3017 | tags=34%, list=19%, signal=27% | EGFR/OXTR/PTPRN/EREG/NCOA1/SIRT1/MSTN/RETN/TGFB2/SLIT3/GPR149/LEP/TIMP4/MMP19/TYRO3/GABRB1/HAS2/TGFB3/PTX3/ADAMTS1/EGR1 |
| GOBP_PEPTIDYL_THREONINE_DEPHOSPHORYLATION | GOBP_PEPTIDYL_THREONINE_DEPHOSPHORYLATION | 21 | -0.60612956 | -1.789486335 | 0.002404238 | 0.022429421 | 0.017277769 | 1451 | tags=38%, list=9%, signal=35% | PPM1E/DUSP1/DUSP16/DUSP9/DUSP10/DUSP5/DUSP8/DUSP6 |
| GOBP_MITOTIC_CELL_CYCLE_CHECKPOINT | GOBP_MITOTIC_CELL_CYCLE_CHECKPOINT | 139 | 0.351024787 | 1.553873637 | 0.002407411 | 0.022429421 | 0.017277769 | 4033 | tags=37%, list=26%, signal=28% | MSH2/NDC80/CDK5RAP2/BRCA1/MAD2L1/PCNA/CHEK1/ZWINT/AURKA/BUB1/CNOT8/GEN1/IK/ZWILCH/AURKB/DONSON/CDT1/ZFYVE19/GADD45A/APC/NAE1/RPL26/RAD17/TRIAP1/KLHL22/TRIP13/MAD2L2/KNTC1/XRCC3/DYNC1LI1/CDKN1B/SYF2/CHEK2/CDC20/ATF2/BUB3/DCLRE1B/CLSPN/CDC6/PSMG2/ZNF830/RAD9A/LCMT1/FOXO4/ATM/EME1/PCBP4/CNOT7/ZW10/RINT1/RPS27L/RAD9B |
| GOBP_POSITIVE_REGULATION_OF_HEMOPOIESIS | GOBP_POSITIVE_REGULATION_OF_HEMOPOIESIS | 144 | -0.351943107 | -1.53021953 | 0.0024076 | 0.022429421 | 0.017277769 | 1036 | tags=13%, list=7%, signal=12% | LILRB2/TGFB1/POU4F2/DUSP10/GATA3/KLF10/TRIB1/POU4F1/PLA2G3/IL20/EGR3/IL10/JUN/NFKBIZ/LIF/BCL6/IL4R/SOCS1/FOS |
| GOBP_ERROR_FREE_TRANSLESION_SYNTHESIS | GOBP_ERROR_FREE_TRANSLESION_SYNTHESIS | 20 | 0.64202499 | 1.895863496 | 0.002437695 | 0.022670727 | 0.017463651 | 4190 | tags=60%, list=27%, signal=44% | PCNA/RFC1/POLD1/POLH/RFC3/RFC5/RPA3/RFC4/POLDIP2/VCP/RPS27A/RPA1 |
| GOBP_BIOMINERALIZATION | GOBP_BIOMINERALIZATION | 151 | -0.345995425 | -1.525320489 | 0.002440981 | 0.022670727 | 0.017463651 | 3087 | tags=32%, list=20%, signal=26% | FBXO5/FGR/WNT10B/ALOX5/ATF4/STATH/FBN2/CEBPB/ACVR1/HEY1/TFAP2A/FAM20A/S1PR1/PHEX/OTOL1/IFITM5/SLC24A3/AMTN/BMP6/TRPM4/TUFT1/SLC20A1/AMELX/ODAM/NELL1/BMP2/TGFB1/LEP/BCOR/LOX/IGF1/KLF10/OTOP1/MGP/GPM6B/SMAD3/ALPL/CYP27B1/KLK4/NOS3/ADRB2/CCL3/SGMS2/OSR1/KL/ACVR2B/SBNO2/FOXO1/TGFB3 |
| GOBP_NEGATIVE_REGULATION_OF_CD4_POSITIVE_ALPHA_BETA_T_CELL_DIFFERENTIATION | GOBP_NEGATIVE_REGULATION_OF_CD4_POSITIVE_ALPHA_BETA_T_CELL_DIFFERENTIATION | 22 | -0.615932462 | -1.834767948 | 0.002443991 | 0.022670727 | 0.017463651 | 686 | tags=18%, list=4%, signal=17% | JAK3/BCL6/IL4R/ZC3H12A |
| GOBP_POSITIVE_REGULATION_OF_NITRIC_OXIDE_METABOLIC_PROCESS | GOBP_POSITIVE_REGULATION_OF_NITRIC_OXIDE_METABOLIC_PROCESS | 35 | -0.536516472 | -1.775509878 | 0.002450922 | 0.022702543 | 0.01748816 | 972 | tags=26%, list=6%, signal=24% | KLF2/SMAD3/ICAM1/NOS1AP/IL1B/EDN1/KLF4/PTX3/PTGS2 |
| GOCC_ER_TO_GOLGI_TRANSPORT_VESICLE_MEMBRANE | GOCC_ER_TO_GOLGI_TRANSPORT_VESICLE_MEMBRANE | 54 | 0.462395318 | 1.704904198 | 0.002463155 | 0.022772861 | 0.017542327 | 4129 | tags=56%, list=27%, signal=41% | KLHL12/STX17/HLA-DRB3/VTI1B/SEC13/TMED10/SEC23B/SEC24A/SEC24D/SEC23A/GOSR2/HLA-F/LMAN1/SEC31A/TMED2/SREBF2/HLA-A/SEC16B/SAR1B/B2M/MCFD2/SAR1A/HLA-DPA1/SEC24C/STX5/SEC31B/USO1/HLA-DQB1/SEC24B/HLA-B |
| GOBP_CELLULAR_RESPIRATION | GOBP_CELLULAR_RESPIRATION | 157 | 0.34333161 | 1.545119005 | 0.002465538 | 0.022772861 | 0.017542327 | 4949 | tags=46%, list=32%, signal=32% | COQ10A/GPD1/COX15/FAHD1/NDUFAF1/IDH1/NDUFA5/NDUFS4/NDUFA6/DLD/IDE/NDUFB2/SUCLG2/POLG2/NDUFB1/AIFM2/MTFR1/NDUFB4/SUCLA2/NDUFA10/COX7A2L/ACO2/CISD1/MDH1/NDUFA9/PDHA1/NDUFB6/UQCRB/UQCRQ/IMMP2L/NDUFV1/PANK2/UQCRC2/SURF1/ETFA/COX6C/PARK7/PDHB/SDHA/NNT/SLC25A23/SUCLG1/NDUFA11/NDUFB10/DGUOK/VCP/COX6B1/CAT/NDUFC1/ME2/ISCU/NDUFAB1/NDUFB3/NDUFA12/IDH2/ETFB/COX6A1/LYRM7/UQCRC1/SDHD/NDUFB5/NDUFS2/OXA1L/SLC25A22/SDHC/NDUFA1/NDUFS5/COX4I1/BID/IDH3B/NDUFS8/DHTKD1/PIK3CA |
| GOBP_REGULATION_OF_LYMPHOCYTE_ACTIVATION | GOBP_REGULATION_OF_LYMPHOCYTE_ACTIVATION | 403 | -0.282651634 | -1.410921963 | 0.0024723 | 0.022793945 | 0.017558569 | 2064 | tags=18%, list=13%, signal=16% | ZMIZ1/HES1/GLI3/NRARP/IL23R/FGF10/TOX/CTLA4/RAC1/WNT3A/LRRC32/IRF4/PRDM1/TICAM1/PGLYRP3/PLA2G2D/TNFRSF1B/TFRC/PRKCQ/TGFBR2/CCR7/NFATC2/NOD2/TNIP2/IL1A/LILRB2/TGFB1/LEP/DUSP10/GATA3/IGF1/CCL21/CEACAM1/SPINK5/IRF1/TNFAIP3/FLOT2/JAK3/ZFP36L2/EBI3/EPO/TNFRSF13C/CDKN1A/CD274/SIRPA/TAC1/CSK/TNFSF14/TYRO3/SIRPB1/DTX1/SOX11/ARG2/SCGB1A1/SLC7A1/EGR3/IL10/PELI1/CD19/IRS2/MAP3K8/IL1B/SDC4/NFKBIZ/CLCF1/BCL6/IL4R/CCL2/IGFBP2/SOCS1/ZC3H12A/IL6 |
| GOBP_CYTOKINETIC_PROCESS | GOBP_CYTOKINETIC_PROCESS | 36 | 0.526405119 | 1.774681672 | 0.002478329 | 0.022793945 | 0.017558569 | 3347 | tags=50%, list=22%, signal=39% | CHMP4A/KLHDC8B/SPAST/RACGAP1/ANLN/CHMP5/AURKB/CHMP6/CHMP2A/ECT2/SPIRE1/CNTROB/KIF20A/MITD1/VPS4B/PDCD6IP/ALKBH4/CHMP1A |
| GOBP_REGULATION_OF_APOPTOTIC_PROCESS_INVOLVED_IN_DEVELOPMENT | GOBP_REGULATION_OF_APOPTOTIC_PROCESS_INVOLVED_IN_DEVELOPMENT | 10 | -0.746342691 | -1.74593519 | 0.002480511 | 0.022793945 | 0.017558569 | 2086 | tags=50%, list=13%, signal=43% | TGFB2/TNFRSF1B/FOXC2/TNFRSF1A/FOXC1 |
| GOBP_CHRONIC_INFLAMMATORY_RESPONSE | GOBP_CHRONIC_INFLAMMATORY_RESPONSE | 19 | -0.623460105 | -1.785318054 | 0.002481882 | 0.022793945 | 0.017558569 | 766 | tags=58%, list=5%, signal=55% | PTGES/IL4/AHCY/CCL11/S100A9/TNFAIP3/S100A8/CXCL13/GJA1/IL10/THBS1 |
| GOBP_DETOXIFICATION_OF_INORGANIC_COMPOUND | GOBP_DETOXIFICATION_OF_INORGANIC_COMPOUND | 15 | -0.67822004 | -1.790708342 | 0.002490594 | 0.022841603 | 0.01759528 | 3271 | tags=73%, list=21%, signal=58% | MT1H/MT1G/MT3/MT2A/MT1E/MT1F/SLC30A1/MT1X/MT1M/MT1A/MT1B |
| GOBP_NEGATIVE_REGULATION_OF_CELL_GROWTH | GOBP_NEGATIVE_REGULATION_OF_CELL_GROWTH | 171 | -0.336583905 | -1.515686958 | 0.002501272 | 0.02290713 | 0.017645757 | 2691 | tags=27%, list=17%, signal=23% | OSTN/SIRT1/MT3/ESR2/SEMA6A/SEMA3C/DCUN1D3/SEMA6C/RERG/MAP2/PRDM11/TRIM46/TGFB2/RGS4/KIAA0319/SEMA3D/OSGIN2/WNT3A/SLIT3/SEMA4F/SEMA3B/HYAL2/DDX3X/SEMA3A/PSRC1/TGFB1/DCC/PI16/CRYAB/SEMA4A/FHL1/SH3BP4/SMAD3/CYP27B1/GJA1/CDKN1A/PLXNA3/WT1/MAG/WNT3/SCGB3A1/SEMA4B/MSX1/SOX17/TNR/RGS2/BCL6 |
| GOBP_3_UTR_MEDIATED_MRNA_DESTABILIZATION | GOBP_3_UTR_MEDIATED_MRNA_DESTABILIZATION | 17 | -0.65663801 | -1.79942751 | 0.002519411 | 0.023040708 | 0.017748654 | 1871 | tags=41%, list=12%, signal=36% | RBM24/KHSRP/ZC3H12D/CPEB3/ZFP36L2/ZFP36/ZC3H12A |
| GOBP_NEGATIVE_REGULATION_OF_DEFENSE_RESPONSE | GOBP_NEGATIVE_REGULATION_OF_DEFENSE_RESPONSE | 184 | -0.335116452 | -1.526540087 | 0.002547211 | 0.023187131 | 0.017861447 | 2612 | tags=24%, list=17%, signal=20% | ADIPOQ/HAMP/SERPINB4/GHRL/MEFV/GPR17/MFHAS1/A2M/ADA/SIGLEC10/MMP26/NLRP12/FEM1A/FPR2/CX3CL1/TNFRSF1B/NOD2/SEC14L1/DUSP10/METRNL/GATA3/IGF1/CEACAM1/SPINK5/OTOP1/GHSR/TNFAIP3/IRAK3/SMAD3/FNDC4/SIRPA/SAA1/LRFN5/TYRO3/ARG2/ADCYAP1/LDLR/TNFRSF1A/IL10/TNFAIP6/NR1D1/SERPINB9/KLF4/SOCS3 |
| GOBP_REGULATION_OF_BONE_MINERALIZATION | GOBP_REGULATION_OF_BONE_MINERALIZATION | 68 | -0.430890633 | -1.651631621 | 0.002547211 | 0.023187131 | 0.017861447 | 3063 | tags=37%, list=20%, signal=30% | WNT10B/ALOX5/STATH/FBN2/ACVR1/TFAP2A/S1PR1/IFITM5/BMP6/TRPM4/NELL1/BMP2/TGFB1/BCOR/MGP/GPM6B/SMAD3/CYP27B1/ADRB2/CCL3/SGMS2/OSR1/KL/ACVR2B/TGFB3 |
| GOBP_PRODUCTION_OF_MOLECULAR_MEDIATOR_INVOLVED_IN_INFLAMMATORY_RESPONSE | GOBP_PRODUCTION_OF_MOLECULAR_MEDIATOR_INVOLVED_IN_INFLAMMATORY_RESPONSE | 66 | -0.434607493 | -1.661478114 | 0.002552215 | 0.023187131 | 0.017861447 | 1161 | tags=18%, list=7%, signal=17% | NOD2/LEP/DUSP10/LBP/SIRPA/PLA2G3/P2RX1/APOD/IL4R/SERPINE1/ZC3H12A/IL6 |
| GOBP_POSITIVE_REGULATION_OF_MYELOID_LEUKOCYTE_DIFFERENTIATION | GOBP_POSITIVE_REGULATION_OF_MYELOID_LEUKOCYTE_DIFFERENTIATION | 53 | -0.456206133 | -1.68586308 | 0.002553302 | 0.023187131 | 0.017861447 | 1032 | tags=19%, list=7%, signal=18% | TGFB1/POU4F2/KLF10/TRIB1/POU4F1/PLA2G3/IL20/JUN/LIF/FOS |
| GOBP_SODIUM_ION_HOMEOSTASIS | GOBP_SODIUM_ION_HOMEOSTASIS | 53 | -0.455860583 | -1.684586135 | 0.002553302 | 0.023187131 | 0.017861447 | 2172 | tags=36%, list=14%, signal=31% | ATP1B3/SLC12A2/AGTR1/SLC9A1/MLLT6/AVPR1A/ATP4A/MC3R/ATP6V1B1/TFAP2B/CYP4A11/IL1A/ATP1B2/SCNN1A/ATP1A2/TAC1/SCN7A/EDN1/SCNN1B |
| GOBP_BASIC_AMINO_ACID_TRANSPORT | GOBP_BASIC_AMINO_ACID_TRANSPORT | 16 | -0.652412337 | -1.758803962 | 0.002592412 | 0.023481583 | 0.018088267 | 1718 | tags=38%, list=11%, signal=33% | SLC25A29/SLC38A3/SLC3A1/SLC11A1/SLC7A1/SLC7A2 |
| GOBP_NEUTROPHIL_MIGRATION | GOBP_NEUTROPHIL_MIGRATION | 109 | -0.379816626 | -1.583535796 | 0.002592969 | 0.023481583 | 0.018088267 | 2086 | tags=30%, list=13%, signal=26% | TGFB2/CCL11/WDR1/CCL8/RAC1/CCL25/CXCL5/CX3CL1/PDE4B/CCL20/CCR7/NOD2/CCL3L3/PRTN3/CXCL6/CCL21/LBP/S100A9/PIP5K1C/S100A8/CCL26/CXCL13/CSF3R/SAA1/C5AR1/CCL3/CCL7/EDN3/CXCL2/CXCL1/EDN1/S100A12/CCL2 |
| GOBP_POSITIVE_REGULATION_OF_ACTIN_FILAMENT_BUNDLE_ASSEMBLY | GOBP_POSITIVE_REGULATION_OF_ACTIN_FILAMENT_BUNDLE_ASSEMBLY | 58 | -0.441727338 | -1.655185514 | 0.002604153 | 0.023549966 | 0.018140944 | 612 | tags=19%, list=4%, signal=18% | RAC1/CX3CL1/PPM1E/SMAD3/ARHGEF5/TAC1/SYNPO2L/LPAR1/SDC4/TGFB3/VIL1 |
| GOBP_REGULATION_OF_NEURON_PROJECTION_DEVELOPMENT | GOBP_REGULATION_OF_NEURON_PROJECTION_DEVELOPMENT | 387 | -0.280228664 | -1.38894916 | 0.002650404 | 0.023934849 | 0.018437427 | 3073 | tags=26%, list=20%, signal=21% | L1CAM/SIPA1L1/KNDC1/KIF1A/CHRNB2/NDEL1/NEUROG3/NTRK1/STK24/TLX2/CHRNA3/ATP8A2/DGKG/MT3/SEMA6A/SEMA3C/SEMA6C/MAPT/STX1B/OMG/ID1/MAP2/ARC/MAGI2/PLXNA2/TRIM46/HECW2/DBN1/SLITRK1/SHANK3/KLK8/NPTN/ZFYVE27/KIAA0319/TOX/KEL/SEMA3D/MAP1B/NFATC4/EEF2K/KALRN/ZNF365/MARK1/DPYSL3/PPP2R5B/WNT3A/DENND5A/INPP5J/SEMA4F/PTPN9/ISLR2/LZTS1/PDLIM5/KLK6/NFE2L2/SEMA3B/CX3CL1/EFNB2/ARHGDIA/POU3F2/PTPRD/SCARF1/SEMA3A/EFHC2/PRRX1/NTRK3/CUX2/TSKU/ATP1B2/POU4F2/ABL2/NTRK2/BRSK1/DDX56/RGMA/VEGFA/GATA3/RAPGEF1/S100A9/SEZ6/UST/NLGN1/DCC/SEMA4A/RND2/EPO/PPFIA2/PLXNA3/PLA2G3/MAG/WNT3/SEMA4B/ADCYAP1/SRF/CDH4/LPAR1/LRP4/TNR/RGS2/TNIK/KLF4 |
| GOBP_NEGATIVE_REGULATION_OF_MUSCLE_CELL_DIFFERENTIATION | GOBP_NEGATIVE_REGULATION_OF_MUSCLE_CELL_DIFFERENTIATION | 49 | -0.469817007 | -1.695683453 | 0.002660432 | 0.023991991 | 0.018481444 | 4854 | tags=63%, list=31%, signal=44% | SHH/ID2/EZH2/MED28/HDAC5/HDAC4/BDNF/RBPMS2/NFATC3/DLL1/TRIM72/HEY2/NFATC1/PTBP1/MYOCD/G6PD/TMEM119/BHLHA15/NKX2-5/CEACAM5/EREG/DKK1/RGS4/FZD7/PDGFB/NFATC2/BMP2/PI16/FGF9/MSX1/RGS2 |
| GOMF_NEUROTRANSMITTER_RECEPTOR_ACTIVITY_INVOLVED_IN_REGULATION_OF_POSTSYNAPTIC_MEMBRANE_POTENTIAL | GOMF_NEUROTRANSMITTER_RECEPTOR_ACTIVITY_INVOLVED_IN_REGULATION_OF_POSTSYNAPTIC_MEMBRANE_POTENTIAL | 47 | -0.468968032 | -1.684736806 | 0.00267483 | 0.024088334 | 0.018555659 | 4476 | tags=66%, list=29%, signal=47% | GABRA6/GABRA1/GRIN3A/GRIK1/GRIN2C/CHRNA5/CHRNG/GABBR1/CHRNB4/GABRR2/CHRNA7/GABRG3/CHRNB2/CHRNA9/CHRNA3/CHRNA4/GRIK4/CHRNA6/GABRA5/GRIK3/GLRA1/GRIK5/GABRB2/CHRM1/GRID1/GLRA2/ADRB1/GABRR1/GABRA2/CHRNA10/GABRB1 |
| GOBP_SPINDLE_ASSEMBLY | GOBP_SPINDLE_ASSEMBLY | 92 | 0.391831061 | 1.631501262 | 0.002717206 | 0.024436008 | 0.018823478 | 4094 | tags=40%, list=26%, signal=30% | AURKA/RACGAP1/RCC1/SAC3D1/GOLGA2/CHMP5/AURKB/CCNB2/KIFC1/STAG1/CHMP2A/NEK2/CLASP2/PRC1/NEK7/MLH1/CEP63/KIF3B/KIF11/TNKS/CEP192/DYNC1H1/MAPRE2/CHEK2/CDC20/VPS4B/TUBGCP3/STAG2/INCENP/CHMP1A/DRG1/CEP97/BCCIP/CHMP2B/LZTS2/KIF2A/RPS3 |
| GOBP_DECIDUALIZATION | GOBP_DECIDUALIZATION | 20 | -0.633852581 | -1.852904005 | 0.002735751 | 0.024568711 | 0.018925701 | 757 | tags=50%, list=5%, signal=48% | GHRL/VDR/EPOR/GHSR/STC2/CYP27B1/GJA1/STC1/LIF/JUNB |
| GOBP_RESPONSE_TO_EXTRACELLULAR_STIMULUS | GOBP_RESPONSE_TO_EXTRACELLULAR_STIMULUS | 440 | -0.267802894 | -1.353956598 | 0.002741002 | 0.024581821 | 0.0189358 | 2921 | tags=25%, list=19%, signal=21% | ATF4/GALP/SEH1L/PCK1/PRL/MYBBP1A/ASS1/SOD2/FOXA2/NTRK1/STK24/SLC39A4/TYR/ULK1/NCOA1/SIRT1/ADIPOQ/MT3/HAMP/GHRL/RELA/AHCY/CARTPT/KAT2A/HTR4/ADA/VDR/LARP1/CDKN2B/AQP3/RASGRP4/UCP1/TH/GCGR/HMOX1/PHEX/SRD5A1/PRKAG3/KRT20/UCN3/SLC6A4/MAP1B/NPY/MYH13/SLC38A2/TBXA2R/AVPR1A/NFE2L2/SLC38A3/CLPS/MN1/AMELX/PMAIP1/LDHA/TGFBR2/TPH2/PROX1/GHRH/SLC22A3/FOXO3/MTHFR/SST/NOD2/MAP1LC3C/CYP24A1/CPT1A/ADRB1/LEP/BRSK1/DHODH/UPP1/KLF10/GHSR/CPEB4/CYP1A1/PENK/MAP1LC3B/STC2/ALPL/EPO/CYP27B1/CDKN1A/CHSY1/ADM/DAPL1/GATA4/ADRB2/SLC25A25/ATF3/ICAM1/NUAK2/ADCYAP1/SRF/LDLR/RNF152/JUN/STC1/PPARGC1A/INHBB/FOXO1/PIM1/SIK1/ZFP36/NR4A2/IGFBP2/FAM107A/FOSL1/ZC3H12A/FOS |
| GOBP_REGULATION_OF_SYNAPSE_ASSEMBLY | GOBP_REGULATION_OF_SYNAPSE_ASSEMBLY | 84 | -0.401565514 | -1.586791697 | 0.0027448 | 0.024581882 | 0.018935847 | 3373 | tags=39%, list=22%, signal=31% | PTPRS/NRXN1/SLIT1/OXTR/CHRNB2/NTRK1/SLITRK4/GHRL/LINGO2/CLSTN2/CBLN1/SLITRK1/EEF2K/WNT3A/PDLIM5/AMIGO3/LRRTM2/PTPRD/NLGN3/EPHB1/SIX4/LRRTM1/CUX2/TPBG/NTRK2/IL1RAP/GHSR/NLGN1/SEMA4A/FLRT3/SLITRK2/LRFN5/SLITRK3 |
| GOBP_INTERLEUKIN_1_PRODUCTION | GOBP_INTERLEUKIN_1_PRODUCTION | 101 | -0.38488717 | -1.573857575 | 0.002775321 | 0.02482094 | 0.019119997 | 1734 | tags=24%, list=11%, signal=21% | STAT3/NLRP12/CX3CL1/PANX1/CCR7/AZU1/NOD2/NLRP2/FOXP1/SERPINB1/IGF1/CEACAM1/SPHK1/GHSR/TNFAIP3/SMAD3/SIRPA/SAA1/CCL3/ARG2/IL10/ZC3H12A/EGR1/IL6 |
| GOBP_POSITIVE_REGULATION_OF_VASOCONSTRICTION | GOBP_POSITIVE_REGULATION_OF_VASOCONSTRICTION | 29 | -0.564151971 | -1.805116621 | 0.002787068 | 0.024886375 | 0.019170403 | 3343 | tags=52%, list=21%, signal=41% | AKT1/FGG/SMTNL2/FGA/EGFR/OXTR/HRH2/CAV1/ADRA1D/DBH/TBXA2R/TRPM4/AVPR1A/GJA1/ICAM1 |
| GOBP_ENDOTHELIAL_CELL_CHEMOTAXIS | GOBP_ENDOTHELIAL_CELL_CHEMOTAXIS | 28 | -0.548639513 | -1.745989402 | 0.002790314 | 0.024886375 | 0.019170403 | 900 | tags=21%, list=6%, signal=20% | VEGFA/CXCL13/FGFR1/EGR3/THBS1/NR4A1 |
| GOBP_REGULATION_OF_CATION_TRANSMEMBRANE_TRANSPORT | GOBP_REGULATION_OF_CATION_TRANSMEMBRANE_TRANSPORT | 309 | -0.292474574 | -1.425004013 | 0.00281418 | 0.025064754 | 0.019307812 | 2934 | tags=28%, list=19%, signal=23% | IFNG/FKBP1A/NTSR1/MTNR1B/SLC43A2/DRD3/PIRT/GRIA2/SHANK1/CACNA2D1/DPP10/ABL1/HAMP/DNAJC30/HAP1/WWP2/CACNG5/SCN5A/CACNG1/WNK4/REM1/PTPN3/JPH2/WNK2/RYR2/KCNMB1/ARC/CAV1/SCN2B/CASQ2/CNIH3/ATP1B3/HECW2/SHANK3/RGS4/KEL/KCNC2/SLC9A1/SCN3B/SLC30A1/SLC9A3R1/CACNG6/FXYD5/KCNS1/KCNIP1/CX3CL1/PLP1/PDE4B/NLGN3/NPSR1/NETO2/KCNS2/GSG1L/ATP1B2/HSPA2/KCNA1/ATP1A2/DHRS7C/NLGN1/PDE4D/DPP6/FHL1/ANK2/TRPC1/ATP2A1/CACNG3/ATP2B4/NOS1/EPO/KCNE4/HPCA/ADRB2/CACNG7/HOMER1/NOS1AP/CACNG2/OSR1/CD19/GEM/EDN3/PPARGC1A/FGF14/TSPAN13/RGS2/CCL2 |
| GOBP_MITOTIC_CYTOKINESIS | GOBP_MITOTIC_CYTOKINESIS | 66 | 0.417010894 | 1.60496772 | 0.002821926 | 0.025099267 | 0.019334397 | 3362 | tags=41%, list=22%, signal=32% | CKAP2/NUSAP1/CHMP4A/KLHDC8B/SPAST/BBS4/RACGAP1/ANLN/CHMP5/CHMP6/APC/CHMP2A/ECT2/UNC119/ESPL1/RASA1/ROCK1/CNTROB/KIF20A/TTC19/MITD1/STMN1/VPS4B/PDCD6IP/INCENP/CHMP1A/STAMBP |
| GOBP_LONG_TERM_MEMORY | GOBP_LONG_TERM_MEMORY | 31 | -0.537510181 | -1.738616481 | 0.002836216 | 0.025191816 | 0.01940569 | 2677 | tags=48%, list=17%, signal=40% | NPAS4/DRD2/LRRN4/SHANK1/KAT2A/ARC/RGS14/NFATC4/CPEB3/NTF4/SGK1/TAC1/PTCHD1/SRF/LDLR |
| GOCC_INTRINSIC_COMPONENT_OF_PRESYNAPTIC_MEMBRANE | GOCC_INTRINSIC_COMPONENT_OF_PRESYNAPTIC_MEMBRANE | 63 | -0.453087386 | -1.723349229 | 0.002841824 | 0.025207095 | 0.019417459 | 3958 | tags=43%, list=25%, signal=32% | SLC6A3/ATP2B1/DRD2/SLC6A9/PTPRS/SCN2A/CNTN5/HTR3A/GRIK4/P2RY1/STX1A/P2RY4/NPTN/GABRA5/SLC6A4/EFNB2/GLRA1/GRIK5/PTPRD/CHRM1/SLC6A11/KCNA1/GRM3/ATP2B4/CDH10/P2RX1/CPLX3 |
| GOBP_REGULATION_OF_ENDOTHELIAL_CELL_DIFFERENTIATION | GOBP_REGULATION_OF_ENDOTHELIAL_CELL_DIFFERENTIATION | 32 | -0.530983581 | -1.729837639 | 0.002847104 | 0.025219428 | 0.019426959 | 1761 | tags=31%, list=11%, signal=28% | VCL/BMP6/PLCB1/JAG1/VEGFA/CEACAM1/S1PR2/TNFRSF1A/IL1B/APOLD1 |
| GOBP_RETROGRADE_TRANSPORT_ENDOSOME_TO_GOLGI | GOBP_RETROGRADE_TRANSPORT_ENDOSOME_TO_GOLGI | 72 | 0.441400102 | 1.726901966 | 0.002856693 | 0.025242611 | 0.019444818 | 4750 | tags=58%, list=31%, signal=41% | GOSR1/HEATR5A/VTI1B/LRRK2/SNX2/TBC1D23/ARFIP1/VAMP3/SNX12/SNX5/GOSR2/ARL1/TBC1D10A/SNX1/STX10/CLTC/VPS54/ARFRP1/GBF1/VPS35/RHOBTB3/CLN5/PLEKHJ1/TBC1D10B/STX16/TBC1D10C/VPS26A/SNX6/VPS29/SGSM2/STX5/VPS52/YKT6/ERC1/SNX3/STX6/CLTCL1/USP7/TMEM87B/BET1L/TBC1D14/GCC2 |
| GOMF_INSULIN_LIKE_GROWTH_FACTOR_BINDING | GOMF_INSULIN_LIKE_GROWTH_FACTOR_BINDING | 23 | -0.592324717 | -1.794667122 | 0.002857507 | 0.025242611 | 0.019444818 | 2878 | tags=48%, list=19%, signal=39% | ESM1/INSR/CRIM1/HTRA4/IGFBP4/ITGB4/LRP2/IGFALS/IGFBP6/IGFBP2/IGFBP1 |
| GOBP_NEGATIVE_REGULATION_OF_SMOOTH_MUSCLE_CELL_PROLIFERATION | GOBP_NEGATIVE_REGULATION_OF_SMOOTH_MUSCLE_CELL_PROLIFERATION | 41 | -0.514945805 | -1.794117498 | 0.002865968 | 0.02528291 | 0.019475861 | 712 | tags=22%, list=5%, signal=21% | TNFAIP3/TRIB1/CDKN1A/IL10/CNN1/PPARGC1A/APOD/KLF4/TGFB3 |
| GOBP_ANTERIOR_POSTERIOR_PATTERN_SPECIFICATION | GOBP_ANTERIOR_POSTERIOR_PATTERN_SPECIFICATION | 187 | -0.331951085 | -1.521024874 | 0.002899165 | 0.025506357 | 0.019647986 | 3085 | tags=30%, list=20%, signal=24% | HELT/HOXD9/LHX1/HOXA10/SKI/HOXC5/FGF8/HOXB9/FOXA2/OTX1/CELSR2/HOXD10/CDX4/SEMA3C/HEY1/KAT2A/NOG/PCDH8/FZD5/HOXA3/TCF15/HOXA11/HOXA9/HOXA5/ARC/HOXC9/PLXNA2/HES4/HES1/GLI3/NRARP/DLL3/WNT3A/NKX3-1/HOXD8/SCMH1/HES2/HIPK2/BMP2/HES5/LRP5/BTG2/SMAD3/HOXB1/ALX4/WT1/GATA4/WNT3/FOXC2/SRF/HOXD13/OSR1/MSX1/ACVR2B/SOX17/FOXC1 |
| GOBP_REGULATION_OF_CD4_POSITIVE_ALPHA_BETA_T_CELL_DIFFERENTIATION | GOBP_REGULATION_OF_CD4_POSITIVE_ALPHA_BETA_T_CELL_DIFFERENTIATION | 50 | -0.457789249 | -1.661731285 | 0.002899165 | 0.025506357 | 0.019647986 | 893 | tags=14%, list=6%, signal=13% | GATA3/JAK3/NFKBIZ/BCL6/IL4R/SOCS1/ZC3H12A |
| GOBP_REGULATION_OF_TRANSCRIPTION_FROM_RNA_POLYMERASE_II_PROMOTER_IN_RESPONSE_TO_OXIDATIVE_STRESS | GOBP_REGULATION_OF_TRANSCRIPTION_FROM_RNA_POLYMERASE_II_PROMOTER_IN_RESPONSE_TO_OXIDATIVE_STRESS | 11 | -0.726422027 | -1.754764936 | 0.002910439 | 0.025570852 | 0.019697668 | 3163 | tags=64%, list=20%, signal=51% | ANKRD2/ATF4/MT3/SIN3A/HMOX1/NFE2L2/EPAS1 |
| GOBP_VASCULAR_ENDOTHELIAL_GROWTH_FACTOR_PRODUCTION | GOBP_VASCULAR_ENDOTHELIAL_GROWTH_FACTOR_PRODUCTION | 33 | -0.536680233 | -1.761763085 | 0.00292345 | 0.025587455 | 0.019710457 | 1516 | tags=27%, list=10%, signal=25% | NOX1/IL1A/SULF1/TGFB1/GATA4/C5AR1/IL1B/PTGS2/IL6 |
| GOBP_REGULATION_OF_LEUKOCYTE_ADHESION_TO_VASCULAR_ENDOTHELIAL_CELL | GOBP_REGULATION_OF_LEUKOCYTE_ADHESION_TO_VASCULAR_ENDOTHELIAL_CELL | 27 | -0.550486032 | -1.734026833 | 0.002925133 | 0.025587455 | 0.019710457 | 2930 | tags=30%, list=19%, signal=24% | ALOX5/RELA/IRAK1/CCL25/CCL21/ICAM1/KLF4/IL6 |
| GOBP_REGULATION_OF_SYNAPTIC_TRANSMISSION_GLUTAMATERGIC | GOBP_REGULATION_OF_SYNAPTIC_TRANSMISSION_GLUTAMATERGIC | 67 | -0.428343208 | -1.643836481 | 0.002927422 | 0.025587455 | 0.019710457 | 3017 | tags=34%, list=19%, signal=28% | EGFR/OXTR/NTRK1/DRD3/GRM2/SHANK1/CACNG5/SHANK3/GRIK3/GRM7/NLGN3/GRM4/TSHZ3/ATP1A2/GRM3/NLGN1/CACNG3/CACNG7/HOMER1/CACNG2/ADCYAP1/TNR/CCL2 |
| GOBP_ARGININE_CATABOLIC_PROCESS | GOBP_ARGININE_CATABOLIC_PROCESS | 10 | -0.742014917 | -1.735811137 | 0.002928114 | 0.025587455 | 0.019710457 | 692 | tags=50%, list=4%, signal=48% | OAT/ATP2B4/NOS1/NOS3/ARG2 |
| GOBP_REGULATION_OF_RECEPTOR_RECYCLING | GOBP_REGULATION_OF_RECEPTOR_RECYCLING | 19 | 0.612856689 | 1.788125807 | 0.002976313 | 0.025932632 | 0.019976353 | 3024 | tags=58%, list=19%, signal=47% | KIF16B/PCSK9/CHMP5/OPTN/NSF/TRAT1/VAMP3/TBC1D16/PSEN1/RAMP3/ANXA2 |
| GOBP_REACTIVE_OXYGEN_SPECIES_BIOSYNTHETIC_PROCESS | GOBP_REACTIVE_OXYGEN_SPECIES_BIOSYNTHETIC_PROCESS | 102 | -0.391037631 | -1.606912704 | 0.00298459 | 0.025932632 | 0.019976353 | 2934 | tags=33%, list=19%, signal=27% | IFNG/ALOX5/ASS1/SOD2/INSR/CD34/TRAP1/GCH1/CAV1/UCP1/GCHFR/RAC1/KHSRP/DUOXA1/RAB27A/TICAM1/CYP1A2/KLF2/CYP1A1/SMAD3/ATP2B4/NOS1/SIRPA/NOS3/ICAM1/NOS1AP/ARG2/IL10/IL1B/EDN1/KLF4/PTX3/PTGS2/ZC3H12A |
| GOBP_CELLULAR_RESPONSE_TO_VASCULAR_ENDOTHELIAL_GROWTH_FACTOR_STIMULUS | GOBP_CELLULAR_RESPONSE_TO_VASCULAR_ENDOTHELIAL_GROWTH_FACTOR_STIMULUS | 57 | -0.437078708 | -1.637173852 | 0.002987612 | 0.025932632 | 0.019976353 | 1666 | tags=23%, list=11%, signal=20% | MAP2K3/PGF/FLT3/MAPKAPK2/VEGFA/SPHK1/ATP2B4/SPRY2/VEGFC/EGR3/ERN1/FOXC1/NR4A1 |
| GOBP_MESENCHYMAL_CELL_DIFFERENTIATION | GOBP_MESENCHYMAL_CELL_DIFFERENTIATION | 212 | -0.321369752 | -1.498837164 | 0.002987612 | 0.025932632 | 0.019976353 | 2496 | tags=24%, list=16%, signal=20% | SEMA6A/SEMA3C/NKX2-1/SPRED1/SEMA6C/ACVR1/SOX8/HEY1/NOG/TBX5/TGFB2/HES1/FGF10/RADIL/SEMA3D/SPRY1/PHACTR4/SEMA4F/AKNA/SEMA3B/AMELX/TGFBR2/SEMA3A/ZNF750/PDPN/BMP2/JAG1/TGFB1/SPRED2/GATA3/TGFBR3/SEMA4A/PHLDB1/SMAD3/PHOX2B/SPRY2/TCF7L2/SOX11/FGFR1/FOXC2/SEMA4B/OSR1/MSX1/EDN3/HAS2/IL1B/EDN1/TGFB3/FOXC1/IL6 |
| GOBP_POSITIVE_REGULATION_OF_STEM_CELL_DIFFERENTIATION | GOBP_POSITIVE_REGULATION_OF_STEM_CELL_DIFFERENTIATION | 18 | -0.632707428 | -1.780460719 | 0.002987612 | 0.025932632 | 0.019976353 | 2192 | tags=50%, list=14%, signal=43% | SP7/NKX2-5/TBX5/TGFB2/RBM24/GATA6/GATA4/TACSTD2/FOXC1 |
| GOBP_REGULATION_OF_EPITHELIAL_TO_MESENCHYMAL_TRANSITION | GOBP_REGULATION_OF_EPITHELIAL_TO_MESENCHYMAL_TRANSITION | 87 | -0.398371122 | -1.585699106 | 0.003001013 | 0.02601413 | 0.020039133 | 3302 | tags=36%, list=21%, signal=28% | TIAM1/EFNA1/LOXL2/ALX1/BAMBI/FOXA2/ISL1/WWTR1/NKX2-1/SPRED1/ACVR1/NOG/TBX5/TGFB2/SPRY1/TGFBR2/ZNF750/PDPN/BMP2/JAG1/TGFB1/SPRED2/GATA3/PHLDB1/SMAD3/SPRY2/TCF7L2/IL1B/TGFB3/FOXC1/IL6 |
| GOMF_PROTEIN_MACROMOLECULE_ADAPTOR_ACTIVITY | GOMF_PROTEIN_MACROMOLECULE_ADAPTOR_ACTIVITY | 243 | 0.304280759 | 1.445850302 | 0.003011695 | 0.026071873 | 0.020083613 | 2851 | tags=28%, list=18%, signal=24% | CD3G/PDZK1/LPL/CNTLN/TRIM22/TRIM5/COL1A2/TRADD/GOSR1/TCAP/STX18/GAS2/BBS4/STX17/PEX3/STX8/VPS11/NAPB/NMD3/CD3E/VTI1B/PIK3R1/FLRT2/LRRK2/STX7/NAPG/SNAP47/BET1/OPTN/GAS6/COL14A1/TRAT1/VAMP8/FRS2/VAMP3/STUB1/IRS1/GRB14/GOSR2/AMFR/CBX5/DET1/ADAP2/FBXO7/SKP1/STAP2/BTRC/STON2/PTPN11/AP2B1/STX2/BAIAP2/BFAR/SORBS2/USE1/HOMER2/VAMP1/STX10/NCK1/FXYD2/SDCBP/SNAP23/STX4/ABI1/SPAG4/CAV2/ARRDC4/PSMC6/VHL |
| GOBP_NEUROTRANSMITTER_RECEPTOR_TRANSPORT | GOBP_NEUROTRANSMITTER_RECEPTOR_TRANSPORT | 43 | -0.485382274 | -1.711843761 | 0.003029756 | 0.02613193 | 0.020129876 | 3024 | tags=37%, list=19%, signal=30% | GRIP1/DRD3/CACNG5/KIF17/STX1B/ARC/DNM1/GSG1L/GRIP2/KIF5A/CACNG3/CALY/HPCA/CACNG7/CPLX1/CACNG2 |
| GOBP_REGULATION_OF_POTASSIUM_ION_TRANSPORT | GOBP_REGULATION_OF_POTASSIUM_ION_TRANSPORT | 91 | -0.390168334 | -1.563973197 | 0.00303295 | 0.02613193 | 0.020129876 | 4170 | tags=45%, list=27%, signal=33% | ITGB1/ACTN2/ADRA2A/DRD2/LRRC52/KCNG1/LRRC55/KCNN2/KCNIP4/ATP1B1/NPPA/ATF4/MTNR1B/DRD3/DPP10/WWP2/WNK4/WNK2/KCNMB1/VIP/CAV1/CASQ2/ATP1B3/RGS4/KEL/KCNC2/KCNS1/KCNIP1/NETO2/KCNS2/ATP1B2/KCNA1/DPP6/KCNA5/FHL1/ANK2/NOS1/KCNE4/NOS1AP/ADCYAP1/EDN3 |
| GOCC_COSTAMERE | GOCC_COSTAMERE | 17 | -0.647569667 | -1.774576943 | 0.003034319 | 0.02613193 | 0.020129876 | 2078 | tags=35%, list=13%, signal=31% | AHNAK2/VCL/ANK2/HOMER1/FLNC/SDC4 |
| GOBP_RESPONSE_TO_HYDROGEN_PEROXIDE | GOBP_RESPONSE_TO_HYDROGEN_PEROXIDE | 121 | -0.368423581 | -1.565130856 | 0.003034754 | 0.02613193 | 0.020129876 | 972 | tags=15%, list=6%, signal=14% | KLF2/SPHK1/CRYAB/TNFAIP3/KCNA5/GPR37L1/SIRPA/KDM6B/NR4A3/RHOB/IL10/JUN/ERN1/IL18RAP/FOXO1/KLF4/FOSL1/IL6 |
| GOBP_REGULATION_OF_LEUKOCYTE_DIFFERENTIATION | GOBP_REGULATION_OF_LEUKOCYTE_DIFFERENTIATION | 258 | -0.2986956 | -1.418916385 | 0.003040388 | 0.02614572 | 0.020140499 | 1036 | tags=12%, list=7%, signal=11% | LILRB2/TGFB1/POU4F2/DUSP10/FOXP1/GATA3/LILRB3/CEACAM1/SPINK5/KLF10/IRF1/JAK3/ZFP36L2/TRIB1/POU4F1/PLA2G3/IL20/CCL3/DTX1/EGR3/IL10/JUN/NFKBIZ/LIF/BCL6/IL4R/SOCS1/MYC/ZC3H12A/FOS |
| GOBP_CARDIAC_MUSCLE_CONTRACTION | GOBP_CARDIAC_MUSCLE_CONTRACTION | 124 | -0.359609035 | -1.536622549 | 0.003059031 | 0.026271197 | 0.020237156 | 3434 | tags=35%, list=22%, signal=27% | CHGA/GAA/KCNN2/SCN10A/DSP/ATP1B1/PPP1R13L/NKX2-5/MYL4/NPPA/ACTC1/ATP1A1/CACNA2D1/JUP/SCN5A/RYR2/CAV1/SCN2B/CASQ2/CACNA1G/SLC9A1/SCN3B/TRPM4/CSRP3/MAP2K3/CXCR4/GJC1/PDE4B/SCN1A/ATP1A2/PDE4D/KCNA5/ANK2/ATP2A1/NOS1/GJA1/KCNE4/GATA4/NOS1AP/HCN4/STC1/RGS2/ZC3H12A |
| GOBP_NEGATIVE_REGULATION_OF_ORGANELLE_ASSEMBLY | GOBP_NEGATIVE_REGULATION_OF_ORGANELLE_ASSEMBLY | 37 | 0.501550538 | 1.701993691 | 0.003064754 | 0.026285538 | 0.020248203 | 3857 | tags=49%, list=25%, signal=37% | CDK5RAP2/CHMP4A/NUPR1/BRCA1/SCFD1/MDM1/MTM1/EVI5L/LRRK2/TBC1D7/FEZ2/ODF2L/KAT2B/TCHP/STYXL1/FEZ1/BECN1/CEP97 |
| GOBP_TROPHECTODERMAL_CELL_DIFFERENTIATION | GOBP_TROPHECTODERMAL_CELL_DIFFERENTIATION | 16 | -0.645275223 | -1.739563395 | 0.003077315 | 0.026358405 | 0.020304334 | 2795 | tags=50%, list=18%, signal=41% | YAP1/ADA/CNOT3/RBM46/BYSL/HAND1/SRF/JUNB |
| GOMF_5_3_EXONUCLEASE_ACTIVITY | GOMF_5_3_EXONUCLEASE_ACTIVITY | 14 | 0.687492298 | 1.867956307 | 0.00308326 | 0.026374487 | 0.020316721 | 3918 | tags=79%, list=25%, signal=59% | FEN1/DCLRE1A/DCP2/DCLRE1C/PLD3/PLD4/DCLRE1B/XRN1/CPSF3/EXOG/EXO1 |
| GOBP_POSITIVE_REGULATION_OF_METAPHASE_ANAPHASE_TRANSITION_OF_CELL_CYCLE | GOBP_POSITIVE_REGULATION_OF_METAPHASE_ANAPHASE_TRANSITION_OF_CELL_CYCLE | 15 | 0.655575555 | 1.818728777 | 0.003089163 | 0.026390158 | 0.020328793 | 4544 | tags=87%, list=29%, signal=61% | ANAPC7/CDC23/CDT1/NSMCE2/ESPL1/RB1/ANAPC11/ANAPC5/DLGAP5/CDC16/ANAPC4/CDC27/CUL3 |
| GOBP_PHOTOTRANSDUCTION | GOBP_PHOTOTRANSDUCTION | 51 | -0.472412432 | -1.728714125 | 0.003106601 | 0.026504207 | 0.020416647 | 3673 | tags=41%, list=24%, signal=32% | GNAQ/RGR/PDC/RHO/CABP4/GRK1/PDE6A/OPN4/PPEF1/RCVRN/NR2E3/PLEKHB1/GPR88/RP1/AIPL1/GNA11/CNGB1/GRK7/GNAT1/SAG/CDS1 |
| GOBP_REGULATION_OF_COAGULATION | GOBP_REGULATION_OF_COAGULATION | 68 | -0.427944949 | -1.640340626 | 0.003125293 | 0.026628644 | 0.020512503 | 1708 | tags=21%, list=11%, signal=18% | TBXA2R/NFE2L2/PDGFB/F3/CEACAM1/PLAT/NOS3/CD9/PLAUR/SERPINB2/THBD/EDN1/THBS1/SERPINE1 |
| GOMF_VOLTAGE_GATED_POTASSIUM_CHANNEL_ACTIVITY | GOMF_VOLTAGE_GATED_POTASSIUM_CHANNEL_ACTIVITY | 83 | -0.404366719 | -1.60379412 | 0.003146463 | 0.026773836 | 0.020624347 | 4571 | tags=48%, list=29%, signal=34% | KCNAB3/KCND3/KCNH4/KCND2/KCNQ2/KCNQ4/KCNA4/KCNA2/LRRC52/KCNG1/KCNJ13/LRRC55/KCNG3/KCNJ9/HCN2/KCNC1/ABCC8/KCNJ12/KCNJ1/KCNJ14/KCNK18/KCNC2/KCNH6/KCNA10/KCNT1/KCNG2/KCNS1/KCNS2/KCNJ6/KCNB2/KCNA1/KCNS3/KCNH3/KCNH5/KCNG4/KCNA5/KCNC3/KCNE4/HCN4/KCNK1 |
| GOBP_NEGATIVE_REGULATION_OF_CYTOKINE_PRODUCTION | GOBP_NEGATIVE_REGULATION_OF_CYTOKINE_PRODUCTION | 257 | -0.304465588 | -1.446196944 | 0.00315726 | 0.026795387 | 0.020640948 | 2158 | tags=19%, list=14%, signal=17% | RPS6KA5/HMOX1/TGFB2/AKAP8/NPTN/IL23R/CRYBA1/RAC1/LRRC32/NLRP12/PGLYRP3/RELB/TRIB2/CX3CL1/CCR7/NOD2/TSKU/TGFB1/KLF2/GATA3/SERPINB1/IGF1/ASB1/TRAIP/LBP/CEACAM1/GHSR/GATA6/TNFAIP3/IRAK3/JAK3/CD274/SIRPA/CSK/ARG2/SCGB1A1/SLC11A1/IL10/APOD/IL1RL1/INHBB/THBS1/KLF4/TGFB3/BCL6/BCL3/ZFP36/EPHA2/ZC3H12A/IL6 |
| GOMF_MODIFICATION_DEPENDENT_PROTEIN_BINDING | GOMF_MODIFICATION_DEPENDENT_PROTEIN_BINDING | 131 | 0.347738231 | 1.525019698 | 0.00315726 | 0.026795387 | 0.020640948 | 3497 | tags=32%, list=22%, signal=25% | NCAPG2/ING4/TDRD3/ING2/ZRANB3/CBX8/BRCC3/ATAD2B/IDE/JMJD7/KDM5A/OPTN/DAXX/ANKRD13A/PSMD4/HDAC6/ZCWPW2/MSL3/CBX4/TP53BP1/ZFAND6/CBX5/YEATS2/ZBTB1/DPF2/ATRX/RAD18/ZFAND2B/TAF1/TRIM24/SPIN1/OTUD7B/RBBP5/USP15/BRD7/ING3/AGAP3/NCAPD3/UBL7/CBX2/SUZ12/VCP |
| GOBP_REGULATION_OF_PRESYNAPSE_ORGANIZATION | GOBP_REGULATION_OF_PRESYNAPSE_ORGANIZATION | 30 | -0.543663234 | -1.755005659 | 0.003182452 | 0.02697388 | 0.020778444 | 2098 | tags=33%, list=13%, signal=29% | CBLN1/SLITRK1/WNT3A/PTPRD/LRRTM1/IL1RAP/NLGN1/SLITRK2/LRFN5/SLITRK3 |
| GOBP_DEOXYRIBONUCLEOTIDE_BIOSYNTHETIC_PROCESS | GOBP_DEOXYRIBONUCLEOTIDE_BIOSYNTHETIC_PROCESS | 14 | 0.684769255 | 1.860557642 | 0.003192724 | 0.027005783 | 0.020803019 | 1698 | tags=50%, list=11%, signal=45% | TYMS/ADK/DUT/DCK/CMPK2/RRM2B/RRM1 |
| GOBP_VASODILATION | GOBP_VASODILATION | 32 | -0.524448175 | -1.708546603 | 0.003200777 | 0.027005783 | 0.020803019 | 1022 | tags=25%, list=7%, signal=23% | ADRB1/KLF2/ADRB3/NOS1/NOS3/ADRB2/CALCA/RGS2 |
| GOBP_GLYCOSPHINGOLIPID_BIOSYNTHETIC_PROCESS | GOBP_GLYCOSPHINGOLIPID_BIOSYNTHETIC_PROCESS | 26 | -0.564031407 | -1.763350289 | 0.003205382 | 0.027005783 | 0.020803019 | 2666 | tags=46%, list=17%, signal=38% | UGT8/GAL3ST1/ST6GALNAC5/ST3GAL1/ST6GALNAC3/B4GALT5/FA2H/A4GALT/ST8SIA2/ST6GALNAC6/B3GALT1/ST8SIA5 |
| GOBP_REGULATION_OF_G_PROTEIN_COUPLED_RECEPTOR_SIGNALING_PATHWAY | GOBP_REGULATION_OF_G_PROTEIN_COUPLED_RECEPTOR_SIGNALING_PATHWAY | 129 | -0.356660675 | -1.529591593 | 0.003205419 | 0.027005783 | 0.020803019 | 3452 | tags=33%, list=22%, signal=26% | RGS6/CHGA/PDC/RHO/GRK1/RGS20/FGF8/GRK6/CRY1/DRD3/SYP/PDE6A/MET/ADA/RASGRP4/RGS14/RGS4/KLK14/PPEF1/KCTD16/KLK6/FRMPD1/PDE4B/PLCB1/APLP1/KCTD8/AIPL1/RGS5/CNGB1/ATP2B4/GRK7/GNAT1/GPR27/ADM/ADRB2/SAG/RGS16/ADCYAP1/RGS1/RAMP1/EDN1/RGS2 |
| GOCC_PHOTORECEPTOR_OUTER_SEGMENT | GOCC_PHOTORECEPTOR_OUTER_SEGMENT | 78 | -0.419737492 | -1.646019777 | 0.003207041 | 0.027005783 | 0.020803019 | 3673 | tags=49%, list=24%, signal=37% | TULP1/OPN1SW/MERTK/CACNA1F/SHANK2/CNGA1/PROM1/GNAQ/PDE6H/USH1C/RGR/LYAR/PDC/RHO/PCDH15/GRK1/ATP8A2/PDE6A/OPN4/RP1L1/CNGB3/NXNL1/MAP1B/CIB2/RAB27A/RCVRN/RPGR/PPEF2/RP1/RGS9BP/GNA11/CNGB1/ROM1/GRK7/GNAT1/MAK/VCAN/SAG |
| GOMF_VOLTAGE_GATED_ION_CHANNEL_ACTIVITY | GOMF_VOLTAGE_GATED_ION_CHANNEL_ACTIVITY | 187 | -0.3309084 | -1.516247213 | 0.003219314 | 0.027073974 | 0.020855548 | 4579 | tags=43%, list=29%, signal=31% | CACNA1C/KCNAB3/KCND3/TRPM5/CACNG8/CLIC6/KCNH4/CACNA1F/GRIN3A/KCND2/KCNQ2/SCN3A/KCNQ4/CLIC5/KCNK12/KCNA4/GRIN2C/KCNA2/CACNA1B/GRIN1/LRRC52/KCNG1/KCNJ13/CACNB1/LRRC55/KCNK10/KCNG3/KCNIP4/CLCNKA/SCN10A/KCNJ9/CACNA1A/SCN2A/HCN2/CACNA1E/KCNC1/GRIN2D/ABCC8/KCNK4/CACNA2D1/KCNJ12/CACNA1I/KCNJ1/CACNG5/SCN5A/CACNG1/KCNJ14/KCNK18/SCN2B/CACNA1G/KCNC2/SCN3B/KCNH6/KCNA10/KCNT1/CACNG6/KCNG2/KCNS1/KCNIP1/NOX1/KCNS2/KCNJ6/SCN1A/KCNB2/TPCN1/KCNA1/SCN9A/KCNS3/KCNH3/TPCN2/KCNH5/KCNG4/KCNA5/KCNC3/CACNG3/KCNE4/CACNG7/SCN7A/HCN4/CACNG2/KCNK1 |
| GOBP_ORGANIC_ACID_CATABOLIC_PROCESS | GOBP_ORGANIC_ACID_CATABOLIC_PROCESS | 236 | 0.309582492 | 1.464789786 | 0.003269813 | 0.027463044 | 0.021155255 | 3732 | tags=37%, list=24%, signal=28% | DDO/CSAD/IDO2/DAO/AKR1A1/AMACR/ACBD5/NPL/HIBCH/QDPR/ECHDC1/DLD/GCSH/ACAD8/BCAT1/SULT2A1/ACADL/CRYM/GLS/HADH/ACOT8/ACAA1/HAO1/BDH2/ALDH8A1/NUDT7/PHYH/DDAH2/NAGK/CYP26A1/GLDC/DBT/IRS1/SCP2/DECR1/HACL1/HNMT/ACADM/PCCB/GNPDA1/ABCD2/THNSL2/MCCC1/AUH/CYP4F2/AKR1D1/PGD/HPD/ABHD1/MTHFS/CROT/EHHADH/GLUD2/ABCD3/HSD17B10/TXN2/FAH/TYSND1/AMDHD2/AFMID/CPT1B/PEX7/PIPOX/QPRT/ETFA/ACAT2/PECR/HMGCL/MCEE/GLUL/ALDH3A2/ACAT1/BCKDK/XYLB/PON1/IVD/ACOX2/HADHB/AGXT2/UROC1/TST/ACAD10/MPST/ALDH1L1/ECH1/IDO1/ACMSD |
| GOBP_CELLULAR_RESPONSE_TO_INORGANIC_SUBSTANCE | GOBP_CELLULAR_RESPONSE_TO_INORGANIC_SUBSTANCE | 197 | -0.324984495 | -1.493938504 | 0.003276237 | 0.027481401 | 0.021169396 | 3420 | tags=30%, list=22%, signal=24% | CPNE7/STAR/AKT1/TFR2/LCE1D/MT1H/SMPD1/MMP9/CPNE2/SYT4/EGFR/JUND/MT1G/ATF4/CYP11B1/MT3/ITPKB/BRAF/SCN5A/MT2A/TFAP2A/SYT15/CPNE8/TH/HMOX1/SLC12A2/MT1E/NFATC4/EEF2K/KCNC2/MT1F/BMP6/RASA4/MT1X/RAD51/NFE2L2/GLRA1/TPH2/CYP1A2/ACER1/GLRA2/CPNE6/KCNA1/MMP3/SYT12/NLGN1/CYP1A1/ALOX5AP/ADCY10/HPCA/JUN/MT1M/PPARGC1A/FOXO1/EDN1/MT1A/MT1B/JUNB/FOS/FOSB |
| GOCC_TRANS_GOLGI_NETWORK | GOCC_TRANS_GOLGI_NETWORK | 210 | 0.314724502 | 1.47451242 | 0.003307813 | 0.027710417 | 0.021345811 | 5057 | tags=47%, list=33%, signal=32% | C17orf75/COG4/WIPI1/ATP8B1/COG5/TRAPPC6B/GOLPH3L/AP1S1/HLA-DRB3/RAB8A/LGR5/STX8/CBY1/TRAPPC6A/LRRK2/ATP8B4/OPTN/TBC1D23/ARFIP1/ATP11C/FAM91A1/VAMP3/COG6/RAB30/MS4A6A/CLTA/LAP3/ARL1/GOLGA1/CLASP2/SCOC/AFTPH/CHID1/STX10/GCNT1/TMEM79/CLTC/VPS54/LLGL1/ARL5A/ARFRP1/RAB10/STX4/PI4K2B/M6PR/MME/CCDC91/ATP9A/GBF1/PLD4/RAB32/RHOBTB3/PLEKHJ1/PRKD1/COG1/VAMP4/USP6NL/STX16/ATP2C1/YIPF2/YIPF6/BOK/PI4K2A/COG3/HLA-DPA1/BECN1/GOLGA4/VPS52/ARFGEF1/HLA-DQB1/ADAM10/GGA3/DPY30/STX6/AP1B1/CLTCL1/CDH1/PCSK1N/PLEKHA8/RABEPK/RAB21/ATP7A/MYO1B/SLC9A7/RAB38/CLN3/ARFGEF2/RAB14/HLA-DQA1/GCC2/TGFBI/GGA2/CD74/HLA-DRA/VAMP7/ARF1/APP/KLHL20 |
| GOBP_PROTEIN_DEGLYCOSYLATION | GOBP_PROTEIN_DEGLYCOSYLATION | 23 | 0.578971238 | 1.764600429 | 0.003312865 | 0.027716924 | 0.021350824 | 2920 | tags=52%, list=19%, signal=42% | DERL2/AGA/EDEM3/OS9/SEL1L/RNF185/AMFR/MAN1A2/EDEM2/RNF139/RNF5/PARK7 |
| GOBP_NEUTROPHIL_CHEMOTAXIS | GOBP_NEUTROPHIL_CHEMOTAXIS | 89 | -0.403035129 | -1.608849565 | 0.003320624 | 0.027746035 | 0.021373248 | 2086 | tags=35%, list=13%, signal=30% | TGFB2/CCL11/CCL8/RAC1/CCL25/CXCL5/CX3CL1/PDE4B/CCL20/CCR7/NOD2/CCL3L3/CXCL6/CCL21/LBP/S100A9/PIP5K1C/S100A8/CCL26/CXCL13/CSF3R/SAA1/C5AR1/CCL3/CCL7/EDN3/CXCL2/CXCL1/EDN1/S100A12/CCL2 |
| GOBP_T_CELL_ACTIVATION | GOBP_T_CELL_ACTIVATION | 439 | -0.274409628 | -1.386009108 | 0.003335844 | 0.027837336 | 0.021443579 | 2595 | tags=21%, list=17%, signal=18% | WAS/ABL1/HHLA2/CDH26/CEBPB/ITPKB/IFNA21/IL12A/CD8B/KAT2A/FZD5/TNFRSF21/TNFSF9/ADA/CAV1/AIRE/ZMIZ1/HES1/GLI3/NRARP/IL23R/TOX/CTLA4/IFNA14/RAC1/STAT3/LRRC32/IL18R1/RAB27A/IRF4/PRDM1/IFNA8/RELB/PLA2G2D/FZD7/TNFRSF1B/TFRC/PRKCQ/TGFBR2/CCR7/NFATC2/NOD2/IL1A/LILRB2/LEP/DUSP10/FOXP1/GATA3/IGF1/CCL21/CEACAM1/SPINK5/IRF1/SEMA4A/FLOT2/JAK3/ZFP36L2/PSMB11/SMAD3/LEPR/EBI3/EPO/TNFRSF13C/RAG2/CD274/SIRPA/CSK/TNFSF14/SIRPB1/DTX1/ICAM1/ARG2/SCGB1A1/SRF/SLC11A1/SLC7A1/EGR3/IL10/PELI1/MAP3K8/IL1B/SDC4/NFKBIZ/BCL6/IL4R/BCL3/CCL2/IGFBP2/SOCS1/ZC3H12A/EGR1/IL6 |
| GOMF_NAD_BINDING | GOMF_NAD_BINDING | 50 | 0.464651534 | 1.683031458 | 0.003369322 | 0.028080574 | 0.02163095 | 2299 | tags=28%, list=15%, signal=24% | ME1/SIRT4/GPD1/HPGD/IDH1/QDPR/DLD/UGDH/NUDT6/HADH/BDH2/ALDH1B1/HSD17B8/NDUFV1 |
| GOBP_MICROVILLUS_ORGANIZATION | GOBP_MICROVILLUS_ORGANIZATION | 21 | -0.595688341 | -1.758660552 | 0.003386977 | 0.028191478 | 0.021716381 | 1628 | tags=33%, list=10%, signal=30% | SLC9A3R1/FXYD5/PODXL/RAP1GAP/KLF5/TNIK/VIL1 |
[truncated: 123,509 more chars]
