# Supplementary material for: Identification of Fatty acid metabolism-Related Genes in the Progression from Non-Alcoholic Fatty Liver to Nonalcoholic fatty liver disease
Source: Research Square preprint supplement (doi:10.21203/rs.3.rs-5030401/v1), 2024-10-21
Supplement: Supplementary file 9 [file 8079e7ee62ffc9b6dd26056c.docx]

| Samples | Activated.B.cell | Activated.CD4.T.cell | Activated.CD8.T.cell | Activated.dendritic.cell | CD56bright.natural.killer.cell | CD56dim.natural.killer.cell | Eosinophil | Gamma.delta.T.cell | Immature..B.cell | Immature.dendritic.cell | MDSC | Macrophage | Mast.cell | Monocyte | Natural.killer.T.cell | Natural.killer.cell | Neutrophil | Plasmacytoid.dendritic.cell | Regulatory.T.cell | T.follicular.helper.cell | Type.1.T.helper.cell | Type.17.T.helper.cell | Type.2.T.helper.cell |
| --- | --- | --- | --- | --- | --- | --- | --- | --- | --- | --- | --- | --- | --- | --- | --- | --- | --- | --- | --- | --- | --- | --- | --- |
| GSM789110 | 0.051381288 | 0.300445514 | 0.662060479 | 0.553577598 | 0.692882767 | 0.578887791 | 0.147851053 | 0.868277932 | 0.349723755 | 0.740196129 | 0.690481519 | 0.380339671 | 0.233649376 | 0.957407345 | 0.414251669 | 0.694839053 | 0.252532706 | 0.716881505 | 0.631192566 | 0.458311973 | 0.523072053 | 0.35121826 | 0.560968206 |
| GSM789111 | 0.158412582 | 0.404996367 | 0.728654543 | 0.588690938 | 0.705004059 | 0.557297774 | 0.169264756 | 0.915446101 | 0.361077348 | 0.752870415 | 0.779266715 | 0.383529241 | 0.357590676 | 0.95349147 | 0.428751417 | 0.710762548 | 0.290974135 | 0.736041186 | 0.649858241 | 0.492627656 | 0.521433126 | 0.307360309 | 0.549778505 |
| GSM789112 | 0.030599719 | 0.307445417 | 0.612049704 | 0.533798456 | 0.672106805 | 0.539609519 | 0.035610218 | 0.835825935 | 0.233965916 | 0.736832239 | 0.583243111 | 0.334454148 | 0.278916711 | 0.931520694 | 0.377452836 | 0.68069637 | 0.18229597 | 0.722728864 | 0.532824936 | 0.444659818 | 0.470645454 | 0.322444869 | 0.547698408 |
| GSM789113 | 0.042011401 | 0.276897434 | 0.654231674 | 0.556492347 | 0.704052472 | 0.55302329 | 0.113579153 | 0.858698129 | 0.367461993 | 0.7525613 | 0.704598327 | 0.416469315 | 0.326555585 | 0.955544 | 0.392474191 | 0.716540652 | 0.277276159 | 0.728904224 | 0.654360359 | 0.491530387 | 0.495765704 | 0.323621635 | 0.526164408 |
| GSM789114 | 0.021596007 | 0.285872387 | 0.653311693 | 0.534888886 | 0.698525774 | 0.552160158 | 0.135503492 | 0.867563398 | 0.309263098 | 0.738864493 | 0.62927939 | 0.339000615 | 0.208463434 | 0.948948283 | 0.416795972 | 0.685326129 | 0.210806213 | 0.713658379 | 0.589672853 | 0.430894087 | 0.498245164 | 0.310079316 | 0.519700334 |
| GSM789115 | 0.093250431 | 0.433717138 | 0.682391219 | 0.547827811 | 0.681118125 | 0.519236219 | 0.074605129 | 0.861203322 | 0.225013011 | 0.771271911 | 0.642666542 | 0.333713636 | 0.265826252 | 0.939398517 | 0.400453558 | 0.695030776 | 0.276642232 | 0.732229421 | 0.527072158 | 0.445203394 | 0.507626542 | 0.331767925 | 0.55638292 |
| GSM789116 | 0 | 0.296564476 | 0.585207739 | 0.508639718 | 0.659882809 | 0.55776377 | 0.068553398 | 0.831832784 | 0.257859685 | 0.743539827 | 0.589071244 | 0.315614396 | 0.264773402 | 0.931265761 | 0.369495041 | 0.676957025 | 0.140768018 | 0.721674916 | 0.537684718 | 0.422127046 | 0.483247638 | 0.305913919 | 0.555316889 |
| GSM789117 | 0.015737002 | 0.297654391 | 0.731926059 | 0.57400043 | 0.692746551 | 0.559481016 | 0.132037707 | 0.846717712 | 0.297668773 | 0.749839427 | 0.725616963 | 0.419856453 | 0.211647833 | 0.953083061 | 0.372026749 | 0.704520803 | 0.251293679 | 0.726598437 | 0.633250973 | 0.473628809 | 0.511302497 | 0.300043212 | 0.554064053 |
| GSM789118 | 0.10351083 | 0.358492918 | 0.785387884 | 0.587012032 | 0.706007352 | 0.540192576 | 0.13172971 | 0.863642994 | 0.252930813 | 0.73309826 | 0.780760198 | 0.411522239 | 0.251396528 | 0.97990785 | 0.42184025 | 0.705957682 | 0.316002983 | 0.706842396 | 0.671936472 | 0.498099059 | 0.507032575 | 0.318555636 | 0.527043994 |
| GSM789119 | 0.15555491 | 0.422231608 | 0.629023197 | 0.562876175 | 0.684189496 | 0.54734542 | 0.112222069 | 0.904316097 | 0.354740893 | 0.75537144 | 0.631461393 | 0.369935156 | 0.222225068 | 0.946650002 | 0.422445634 | 0.701515372 | 0.185697413 | 0.728983698 | 0.609715394 | 0.480762357 | 0.510341102 | 0.312740929 | 0.5636719 |
| GSM789120 | 0.065906176 | 0.351408462 | 0.701951931 | 0.571943548 | 0.711692009 | 0.561638999 | 0.141643068 | 0.918166803 | 0.314701298 | 0.761499207 | 0.78390219 | 0.435807019 | 0.274506119 | 0.969519179 | 0.439138951 | 0.723204001 | 0.285989038 | 0.752382635 | 0.676256537 | 0.50793063 | 0.521239212 | 0.310276715 | 0.520621238 |
| GSM789121 | 0.088706275 | 0.381425105 | 0.745244354 | 0.565166451 | 0.697275724 | 0.567969569 | 0.128507544 | 0.892407233 | 0.296633617 | 0.741437604 | 0.753691001 | 0.415426027 | 0.283087606 | 0.988776072 | 0.40602027 | 0.694071635 | 0.25744667 | 0.71425901 | 0.664698993 | 0.516976168 | 0.521906771 | 0.310514273 | 0.533615923 |
| GSM789122 | 0.028075693 | 0.325894193 | 0.689909394 | 0.575677927 | 0.694523122 | 0.561425689 | 0.135593692 | 0.899852117 | 0.227692981 | 0.747877992 | 0.700724438 | 0.387516328 | 0.314416503 | 0.943385069 | 0.416507297 | 0.687676284 | 0.241397761 | 0.712967512 | 0.629411682 | 0.450665259 | 0.511306723 | 0.319048636 | 0.547472763 |
| GSM789123 | 0.067689723 | 0.319158561 | 0.66618389 | 0.533538163 | 0.683358232 | 0.554632195 | 0.130816323 | 0.864455713 | 0.241510682 | 0.719607298 | 0.653445445 | 0.327490876 | 0.245412725 | 0.932075634 | 0.414889366 | 0.6763808 | 0.252327801 | 0.697516024 | 0.526726271 | 0.425188238 | 0.527744607 | 0.335870801 | 0.560031482 |
| GSM789124 | 0.04222897 | 0.311286593 | 0.681308829 | 0.543865726 | 0.684267436 | 0.535473891 | 0.097699054 | 0.878655887 | 0.32415189 | 0.754802939 | 0.631625712 | 0.351124432 | 0.269570847 | 0.929446336 | 0.402304698 | 0.705569756 | 0.212650161 | 0.724959101 | 0.539039065 | 0.456181667 | 0.512683543 | 0.319132648 | 0.533387856 |
| GSM789125 | 0.062151346 | 0.357183531 | 0.70061057 | 0.581506825 | 0.69914229 | 0.545771523 | 0.138365402 | 0.918063668 | 0.357122671 | 0.758927733 | 0.777496256 | 0.419669785 | 0.302641758 | 0.97614454 | 0.436335919 | 0.704612884 | 0.235624538 | 0.723558658 | 0.664183775 | 0.489387107 | 0.528173529 | 0.32178957 | 0.532313795 |
| GSM789126 | 0.100108937 | 0.31363392 | 0.667725976 | 0.567159212 | 0.680796267 | 0.574500918 | 0.152695239 | 0.862059263 | 0.258893721 | 0.746332218 | 0.733696744 | 0.37811721 | 0.333756323 | 0.984450755 | 0.405731092 | 0.692065422 | 0.269040545 | 0.716166137 | 0.656587853 | 0.479888193 | 0.540283617 | 0.341373255 | 0.522932942 |
| GSM789127 | 0.024075951 | 0.266632443 | 0.581923278 | 0.538728183 | 0.702939368 | 0.568674307 | 0.055553066 | 0.854008005 | 0.255835434 | 0.735067191 | 0.649171251 | 0.350655084 | 0.215684339 | 0.945953488 | 0.390083003 | 0.692413791 | 0.159913661 | 0.76426536 | 0.605525456 | 0.466431134 | 0.480447788 | 0.307340137 | 0.537511987 |
| GSM789128 | 0.067754126 | 0.402696176 | 0.716437905 | 0.566853809 | 0.697651794 | 0.554233377 | 0.15097713 | 0.92996082 | 0.343206026 | 0.732714876 | 0.719900209 | 0.374810659 | 0.315158909 | 0.946830239 | 0.428681102 | 0.681370684 | 0.202976232 | 0.703038176 | 0.660180716 | 0.477316105 | 0.523364619 | 0.321122602 | 0.530356724 |
| GSM789129 | 0.141362224 | 0.479525359 | 0.728168323 | 0.654514924 | 0.709660866 | 0.543866984 | 0.198120316 | 0.925799945 | 0.270782805 | 0.750476357 | 0.88020415 | 0.513006965 | 0.3354451 | 0.983114122 | 0.448389773 | 0.731136488 | 0.414224226 | 0.729167126 | 0.714949438 | 0.514250285 | 0.538627394 | 0.361643114 | 0.562180183 |
| GSM789130 | 0.084552524 | 0.38876426 | 0.735266282 | 0.585710627 | 0.696491676 | 0.560341467 | 0.155100235 | 0.909327302 | 0.305221014 | 0.758966577 | 0.784987356 | 0.419133445 | 0.290798014 | 0.978991831 | 0.45045545 | 0.717480066 | 0.25930662 | 0.736776274 | 0.698631134 | 0.515269178 | 0.551923692 | 0.322282216 | 0.547415752 |
| GSM789131 | 0.059726018 | 0.313234285 | 0.644797558 | 0.590884775 | 0.691323179 | 0.567819636 | 0.079687507 | 0.891801433 | 0.31589327 | 0.754091919 | 0.75964323 | 0.434432345 | 0.223660532 | 0.965010083 | 0.404527331 | 0.692096241 | 0.311112315 | 0.745434025 | 0.648420851 | 0.445544058 | 0.523270939 | 0.305004965 | 0.502115853 |
| GSM789132 | 0.06738131 | 0.407252425 | 0.786067536 | 0.543356413 | 0.708782542 | 0.540646944 | 0.165541194 | 0.900439637 | 0.266089787 | 0.733445916 | 0.69289491 | 0.355813382 | 0.295586403 | 0.939886195 | 0.423316296 | 0.678305248 | 0.20212796 | 0.699159163 | 0.615163548 | 0.461909185 | 0.527703473 | 0.321975825 | 0.557917008 |
| GSM789133 | 0.077924257 | 0.43787308 | 0.70061072 | 0.585622688 | 0.68712282 | 0.568398055 | 0.149323766 | 0.922832654 | 0.257560432 | 0.742259735 | 0.795761735 | 0.392005787 | 0.345972189 | 0.953515139 | 0.43821906 | 0.683538566 | 0.296189228 | 0.725991431 | 0.67512535 | 0.485408799 | 0.537260787 | 0.314828317 | 0.55692715 |
| GSM789134 | 0.041524449 | 0.386466636 | 0.739063442 | 0.56779227 | 0.700702748 | 0.568347022 | 0.164605434 | 0.919360536 | 0.380710839 | 0.747726047 | 0.745967314 | 0.42349045 | 0.261153543 | 0.955041428 | 0.416621888 | 0.705796822 | 0.29961211 | 0.738152363 | 0.66020826 | 0.488829692 | 0.535152225 | 0.340505856 | 0.543722044 |
| GSM789135 | 0.081077253 | 0.315198625 | 0.68154703 | 0.576706591 | 0.706774772 | 0.532498166 | 0.099581237 | 0.880322894 | 0.356362927 | 0.75251346 | 0.713208008 | 0.404490151 | 0.290097016 | 0.951338598 | 0.399678343 | 0.691987433 | 0.269305421 | 0.736691959 | 0.627226291 | 0.480602257 | 0.518622269 | 0.31231669 | 0.539545893 |
| GSM789136 | 0.113567223 | 0.318072337 | 0.662546929 | 0.566937903 | 0.692186699 | 0.554509983 | 0.130751681 | 0.873746961 | 0.278914825 | 0.72196166 | 0.702916354 | 0.396829716 | 0.284175967 | 0.949872407 | 0.405798651 | 0.683258968 | 0.246877608 | 0.737959562 | 0.642631494 | 0.493660141 | 0.534721491 | 0.316393633 | 0.518777206 |
| GSM789137 | 0.068005225 | 0.335166695 | 0.669676491 | 0.566703233 | 0.696463643 | 0.550174832 | 0.104173912 | 0.902743829 | 0.369986627 | 0.754505973 | 0.764884054 | 0.410014638 | 0.334491157 | 0.973590592 | 0.43016755 | 0.706366538 | 0.271166083 | 0.736458268 | 0.682770777 | 0.515145918 | 0.512955181 | 0.315782164 | 0.537936344 |
| GSM789138 | 0.088002779 | 0.366983682 | 0.777017684 | 0.556563509 | 0.699160364 | 0.562144187 | 0.081977906 | 0.874239138 | 0.265194343 | 0.739097401 | 0.721312358 | 0.353175424 | 0.30090815 | 0.944546587 | 0.40265512 | 0.694131559 | 0.210689771 | 0.709371732 | 0.56945718 | 0.480182782 | 0.51572922 | 0.365994366 | 0.548864332 |
| GSM789139 | 0.139273562 | 0.377955105 | 0.805205279 | 0.604086091 | 0.704957318 | 0.571801824 | 0.126103823 | 0.912883574 | 0.392901501 | 0.744821686 | 0.826826775 | 0.438611738 | 0.36330309 | 1 | 0.441607635 | 0.721334467 | 0.321342584 | 0.735500636 | 0.710634539 | 0.519997376 | 0.523621228 | 0.350356369 | 0.520112058 |
| GSM789140 | 0.060351218 | 0.343907895 | 0.665463944 | 0.538830342 | 0.697495115 | 0.579626115 | 0.081869735 | 0.862925135 | 0.234193973 | 0.747828473 | 0.66391102 | 0.339521343 | 0.278962591 | 0.92734666 | 0.423150926 | 0.682298615 | 0.23569782 | 0.750727455 | 0.554044332 | 0.441084367 | 0.503415493 | 0.347354378 | 0.544713893 |
| GSM789141 | 0.054955873 | 0.306588114 | 0.710949832 | 0.57784217 | 0.692672353 | 0.544127128 | 0.063017574 | 0.868183086 | 0.340877052 | 0.730255844 | 0.727983901 | 0.376294723 | 0.291287568 | 0.962573627 | 0.408291353 | 0.697407138 | 0.265204045 | 0.706152442 | 0.64181541 | 0.480861985 | 0.513542583 | 0.332964601 | 0.502357537 |
| GSM789142 | 0.054233291 | 0.325715548 | 0.745947779 | 0.558783206 | 0.690558895 | 0.540013822 | 0.12209239 | 0.849931674 | 0.350928466 | 0.739950131 | 0.697679842 | 0.384952233 | 0.254926779 | 0.937511275 | 0.393037612 | 0.677569045 | 0.25805406 | 0.712648422 | 0.603924792 | 0.449373966 | 0.496028036 | 0.315971022 | 0.557377385 |
| GSM789143 | 0.11797633 | 0.325702364 | 0.773552621 | 0.59953977 | 0.709283712 | 0.549101404 | 0.152375464 | 0.908888945 | 0.416584458 | 0.73986966 | 0.792694944 | 0.402558584 | 0.339007979 | 0.967930825 | 0.415407787 | 0.726165495 | 0.279585902 | 0.711935759 | 0.672416691 | 0.492544151 | 0.533682583 | 0.292816788 | 0.487128077 |
| GSM789144 | 0.079946054 | 0.293547762 | 0.698261631 | 0.560204417 | 0.693137542 | 0.566060307 | 0.155310979 | 0.872072535 | 0.269291141 | 0.742922109 | 0.71545168 | 0.410013209 | 0.288936327 | 0.952354479 | 0.419490647 | 0.688636642 | 0.276628527 | 0.720155286 | 0.628879112 | 0.447948167 | 0.513861359 | 0.342146694 | 0.555887808 |
| GSM789145 | 0.442082436 | 0.573924176 | 0.929911034 | 0.602948325 | 0.72755905 | 0.568544151 | 0.202022291 | 0.947985209 | 0.424066209 | 0.767012389 | 0.892815879 | 0.436490391 | 0.339735462 | 0.982372639 | 0.443019896 | 0.739577749 | 0.222758658 | 0.758256226 | 0.798795261 | 0.55708286 | 0.564725948 | 0.34950825 | 0.595045702 |
| GSM789146 | 0.062213106 | 0.303127929 | 0.698701302 | 0.567764884 | 0.684877953 | 0.559505626 | 0.081869235 | 0.878645377 | 0.226910478 | 0.724957404 | 0.632068972 | 0.349974285 | 0.216646787 | 0.931348754 | 0.400343369 | 0.637272825 | 0.202173117 | 0.68750767 | 0.573052887 | 0.444438027 | 0.50382672 | 0.338632605 | 0.522276997 |
| GSM789147 | 0.036887731 | 0.284204142 | 0.646193307 | 0.525037388 | 0.676492945 | 0.558039349 | 0.092864891 | 0.850020257 | 0.298173544 | 0.713071404 | 0.633509219 | 0.361949842 | 0.284968387 | 0.928773642 | 0.360639297 | 0.673052892 | 0.221840298 | 0.716964922 | 0.57114095 | 0.436085265 | 0.483050138 | 0.328854258 | 0.516697602 |
| GSM789148 | 0.033449991 | 0.313817604 | 0.676597571 | 0.586364167 | 0.699837359 | 0.537684848 | 0.145368936 | 0.879784359 | 0.271704097 | 0.7378614 | 0.701678108 | 0.384803434 | 0.310734062 | 0.942334413 | 0.419326507 | 0.685114837 | 0.253404657 | 0.740342054 | 0.643862348 | 0.453418037 | 0.537488037 | 0.327477776 | 0.557606003 |
| GSM789149 | 0.080711827 | 0.424949487 | 0.75812771 | 0.577289825 | 0.707568104 | 0.599724395 | 0.184214796 | 0.916474014 | 0.339541836 | 0.745195687 | 0.800116035 | 0.443994618 | 0.306588454 | 0.96240189 | 0.435072486 | 0.706056198 | 0.285869358 | 0.731653023 | 0.69619378 | 0.527081879 | 0.544384111 | 0.324982362 | 0.563319448 |
| GSM789150 | 0.073115903 | 0.354762986 | 0.733383321 | 0.574190871 | 0.704617425 | 0.588615889 | 0.131158537 | 0.917812273 | 0.277944289 | 0.730743356 | 0.749824352 | 0.413933267 | 0.300236228 | 0.956835398 | 0.422052615 | 0.697138415 | 0.287666937 | 0.708147382 | 0.643272351 | 0.502581598 | 0.507954612 | 0.317322704 | 0.517743506 |
| GSM789151 | 0.161373427 | 0.456889213 | 0.723513325 | 0.593243515 | 0.709584133 | 0.540613411 | 0.126100217 | 0.910757348 | 0.232820714 | 0.750081383 | 0.819014499 | 0.412033583 | 0.417491826 | 0.958465404 | 0.455249236 | 0.708398694 | 0.219802541 | 0.722400998 | 0.717402727 | 0.525467166 | 0.553068912 | 0.362720109 | 0.580626317 |
| GSM789152 | 0.05876912 | 0.30570395 | 0.642889148 | 0.514324201 | 0.683280766 | 0.572021738 | 0.038549715 | 0.849969463 | 0.267700475 | 0.736798467 | 0.602690809 | 0.331220553 | 0.190423831 | 0.949590309 | 0.390772632 | 0.668302419 | 0.183466996 | 0.738293079 | 0.484178369 | 0.422569095 | 0.49062014 | 0.31647242 | 0.568411961 |
| GSM789153 | 0.058759583 | 0.297410397 | 0.626036483 | 0.532843112 | 0.673460169 | 0.578798343 | 0.077149763 | 0.838607545 | 0.211683871 | 0.736079659 | 0.628587682 | 0.311610692 | 0.278251863 | 0.947916147 | 0.382515185 | 0.696006792 | 0.247593065 | 0.714327971 | 0.525175997 | 0.407874953 | 0.504222797 | 0.345201454 | 0.531900832 |
| GSM789154 | 0.059544206 | 0.241442493 | 0.597500377 | 0.5464882 | 0.674643767 | 0.527671875 | 0.069041406 | 0.822191917 | 0.28803865 | 0.751449592 | 0.609456747 | 0.341435402 | 0.271650369 | 0.919446189 | 0.360602935 | 0.644239115 | 0.262561734 | 0.738210454 | 0.552183796 | 0.469600516 | 0.49226561 | 0.306952018 | 0.566515695 |
| GSM789155 | 0.037279992 | 0.289969966 | 0.63796221 | 0.525855562 | 0.689949179 | 0.51227233 | 0.121765623 | 0.845256027 | 0.253715264 | 0.733486559 | 0.613373561 | 0.327147916 | 0.259044448 | 0.914365947 | 0.386716133 | 0.681977495 | 0.202186565 | 0.727487102 | 0.531080527 | 0.42029908 | 0.500506256 | 0.304537062 | 0.585439458 |
| GSM789156 | 0.102700689 | 0.362960865 | 0.724895032 | 0.605655799 | 0.704302822 | 0.57035225 | 0.08436165 | 0.935537369 | 0.312480242 | 0.731799085 | 0.770087388 | 0.420930672 | 0.285235171 | 0.947636712 | 0.442870311 | 0.697045569 | 0.277192239 | 0.715941098 | 0.670468292 | 0.515115548 | 0.542652148 | 0.322174777 | 0.538594963 |
| GSM789157 | 0.025229216 | 0.194371353 | 0.555044999 | 0.49684882 | 0.681246159 | 0.614614978 | 0.084053709 | 0.793407823 | 0.189742524 | 0.739669315 | 0.535313102 | 0.311790454 | 0.196834952 | 0.935556056 | 0.324182289 | 0.676466182 | 0.265203516 | 0.696620421 | 0.468632756 | 0.407097799 | 0.478511896 | 0.324766937 | 0.514306444 |
| GSM789158 | 0.094188574 | 0.393096615 | 0.74753843 | 0.57390361 | 0.712406524 | 0.55583469 | 0.154048882 | 0.920544582 | 0.368684837 | 0.749819477 | 0.787958929 | 0.444025094 | 0.384102788 | 0.951741015 | 0.428534597 | 0.693076751 | 0.336378788 | 0.713854175 | 0.700328328 | 0.522611411 | 0.530489626 | 0.325554772 | 0.552088379 |
| GSM789159 | 0.101188953 | 0.310746365 | 0.714167176 | 0.569437965 | 0.701329743 | 0.555327428 | 0.098499201 | 0.812912217 | 0.278863556 | 0.735726402 | 0.730773891 | 0.379237208 | 0.207622881 | 0.979993993 | 0.382409928 | 0.692116242 | 0.238646835 | 0.721469445 | 0.600878478 | 0.46305543 | 0.506589298 | 0.320451908 | 0.509294278 |
| GSM789160 | 0.114233589 | 0.369491374 | 0.663991912 | 0.562489923 | 0.681462372 | 0.560984575 | 0.112704951 | 0.921585522 | 0.258108834 | 0.752231182 | 0.717811204 | 0.388358906 | 0.237098617 | 0.94156773 | 0.428713922 | 0.683840114 | 0.264854759 | 0.705912555 | 0.646017306 | 0.519457984 | 0.506285086 | 0.306802711 | 0.548854153 |
| GSM789161 | 0.091936478 | 0.328670917 | 0.710234603 | 0.577541407 | 0.687763292 | 0.521464202 | 0.132120729 | 0.894345621 | 0.27758555 | 0.735605175 | 0.754302854 | 0.405327584 | 0.271097403 | 0.959405717 | 0.399454731 | 0.647214062 | 0.317576093 | 0.733879126 | 0.682149712 | 0.485062374 | 0.526538 | 0.317610267 | 0.544657129 |
| GSM789162 | 0.067986533 | 0.289080531 | 0.700637962 | 0.579873855 | 0.715514617 | 0.56945631 | 0.134191039 | 0.883526345 | 0.322064848 | 0.740161662 | 0.722701178 | 0.399289935 | 0.294775643 | 0.970877909 | 0.391315873 | 0.712201408 | 0.244744943 | 0.722778333 | 0.647653207 | 0.466511658 | 0.517946782 | 0.348189517 | 0.507071486 |
| GSM789163 | 0.098531194 | 0.348393171 | 0.704655806 | 0.556457079 | 0.699635204 | 0.55824336 | 0.090410848 | 0.857491686 | 0.323501978 | 0.747699469 | 0.709865315 | 0.378541347 | 0.321902535 | 0.977606588 | 0.400413325 | 0.714163992 | 0.257908074 | 0.721095517 | 0.603510852 | 0.481638288 | 0.503200916 | 0.321742159 | 0.542744807 |
| GSM789164 | 0.099323764 | 0.418505401 | 0.726083259 | 0.588679542 | 0.714485626 | 0.549151795 | 0.180539517 | 0.896823438 | 0.323046127 | 0.752077309 | 0.839143641 | 0.466654782 | 0.341999788 | 0.976352647 | 0.450754803 | 0.719420177 | 0.345433678 | 0.752753538 | 0.726354798 | 0.522324405 | 0.528126563 | 0.329041383 | 0.594398033 |
| GSM789165 | 0.073801099 | 0.2997318 | 0.688627127 | 0.584927871 | 0.693966416 | 0.599900891 | 0.111455861 | 0.841865357 | 0.316035909 | 0.744434789 | 0.64445755 | 0.367149727 | 0.212467205 | 0.981692533 | 0.389155684 | 0.688750332 | 0.229685311 | 0.722827378 | 0.609820188 | 0.462310233 | 0.513346745 | 0.325729294 | 0.513677624 |
| GSM789166 | 0.050651092 | 0.326054808 | 0.69008037 | 0.56067351 | 0.709506722 | 0.585192748 | 0.115408597 | 0.876601943 | 0.335427376 | 0.744443912 | 0.71237103 | 0.390931541 | 0.310494425 | 0.948157768 | 0.400041219 | 0.688675914 | 0.302103457 | 0.706310442 | 0.638222266 | 0.460351182 | 0.495968798 | 0.328703215 | 0.495847693 |
| GSM789167 | 0.092386826 | 0.363060766 | 0.677643183 | 0.59256333 | 0.680071586 | 0.545663449 | 0.146093989 | 0.900236124 | 0.292262639 | 0.750758689 | 0.740791424 | 0.382051885 | 0.302748581 | 0.957482172 | 0.420178534 | 0.707867554 | 0.270507353 | 0.755148972 | 0.652036801 | 0.487224119 | 0.523787331 | 0.334698365 | 0.562821747 |
| GSM789168 | 0.100573665 | 0.36008976 | 0.697394869 | 0.562488515 | 0.706930987 | 0.578830708 | 0.111657445 | 0.900527015 | 0.265685767 | 0.737638658 | 0.730822283 | 0.38695254 | 0.386988032 | 0.968940071 | 0.407986556 | 0.683366267 | 0.268569772 | 0.700084628 | 0.649719601 | 0.461951076 | 0.531110471 | 0.339483805 | 0.524479341 |
| GSM789169 | 0.07212599 | 0.373873716 | 0.694305448 | 0.607067265 | 0.717148134 | 0.553305634 | 0.190687655 | 0.899435595 | 0.3130237 | 0.757731928 | 0.781529194 | 0.385493086 | 0.254983661 | 0.95535046 | 0.440969487 | 0.700363411 | 0.27793294 | 0.740844464 | 0.638384195 | 0.495205299 | 0.538417768 | 0.325305421 | 0.584207298 |
| GSM789170 | 0.073739158 | 0.306680438 | 0.707029829 | 0.536051576 | 0.697323259 | 0.560427347 | 0.130753594 | 0.867075581 | 0.302787132 | 0.728405721 | 0.697186574 | 0.348362178 | 0.294066581 | 0.935506971 | 0.388264521 | 0.699359233 | 0.247006757 | 0.713363393 | 0.568752083 | 0.45702387 | 0.52308269 | 0.331858717 | 0.518096449 |
| GSM789171 | 0.09776897 | 0.368043153 | 0.687303769 | 0.563514126 | 0.709824603 | 0.551994095 | 0.11249032 | 0.886631098 | 0.286799 | 0.761986202 | 0.706217791 | 0.383516392 | 0.334058605 | 0.978888559 | 0.431960275 | 0.657734819 | 0.225453732 | 0.728285064 | 0.647088463 | 0.481624808 | 0.530709502 | 0.333374232 | 0.543899451 |
| GSM789172 | 0.098366661 | 0.427230955 | 0.770075477 | 0.563356868 | 0.701770547 | 0.552256015 | 0.130066805 | 0.896328496 | 0.273291495 | 0.740336836 | 0.777505775 | 0.383418116 | 0.316404385 | 0.947092382 | 0.423668053 | 0.672358944 | 0.288026326 | 0.724476843 | 0.651491035 | 0.456884572 | 0.541945042 | 0.299810561 | 0.531645358 |
| GSM789173 | 0.1094652 | 0.378002083 | 0.735490776 | 0.586143255 | 0.717036095 | 0.542541314 | 0.157463992 | 0.906299784 | 0.299436029 | 0.744713684 | 0.731036441 | 0.404515281 | 0.307444437 | 0.958211781 | 0.462670461 | 0.702630475 | 0.239866564 | 0.732999551 | 0.70015957 | 0.497225802 | 0.54137769 | 0.335703849 | 0.549774854 |
| GSM789174 | 0.08700879 | 0.388364181 | 0.726393242 | 0.559902031 | 0.70322838 | 0.531381075 | 0.142821238 | 0.905255757 | 0.270391619 | 0.751061808 | 0.758209268 | 0.417224396 | 0.333819851 | 0.969614041 | 0.420350256 | 0.705577733 | 0.297925707 | 0.7278447 | 0.666419559 | 0.482827615 | 0.530241302 | 0.335079269 | 0.547365528 |
| GSM789175 | 0.024957107 | 0.365375079 | 0.62192167 | 0.511022905 | 0.681800437 | 0.558031887 | 0.129378076 | 0.863094617 | 0.29510974 | 0.727997627 | 0.634481588 | 0.331961142 | 0.209033314 | 0.916091699 | 0.377384305 | 0.673005837 | 0.198543383 | 0.750617294 | 0.536501656 | 0.42539832 | 0.506621336 | 0.31767689 | 0.578418247 |
| GSM789176 | 0.040265877 | 0.276091922 | 0.608697201 | 0.524078673 | 0.689274762 | 0.53474401 | 0.109189253 | 0.853814341 | 0.252524366 | 0.735393862 | 0.577828004 | 0.339054164 | 0.187421093 | 0.937766387 | 0.379445049 | 0.66748962 | 0.217831391 | 0.721199801 | 0.541834067 | 0.414175924 | 0.497972062 | 0.307879763 | 0.52246752 |
| GSM789177 | 0.187807839 | 0.366920076 | 0.803334613 | 0.582916973 | 0.725335117 | 0.579627522 | 0.154692761 | 0.902678113 | 0.416108459 | 0.752409067 | 0.838365593 | 0.431557328 | 0.332647093 | 0.979090628 | 0.434467262 | 0.723026385 | 0.392856901 | 0.754846563 | 0.69968734 | 0.509587571 | 0.53572598 | 0.319202983 | 0.583822327 |
| GSM789178 | 0.047597772 | 0.307277004 | 0.662797262 | 0.562650887 | 0.677357014 | 0.548522269 | 0.081708111 | 0.883824721 | 0.255343209 | 0.754287829 | 0.704306409 | 0.396626535 | 0.259749568 | 0.962933246 | 0.409939792 | 0.695438536 | 0.271789621 | 0.716164431 | 0.637115115 | 0.479675453 | 0.513288931 | 0.332994004 | 0.532494802 |
| GSM789179 | 0.070440428 | 0.390769299 | 0.794092506 | 0.566715119 | 0.706195745 | 0.551019187 | 0.112974657 | 0.890713893 | 0.298872021 | 0.747008117 | 0.780325873 | 0.435173789 | 0.267408356 | 0.975283179 | 0.401177093 | 0.719044209 | 0.277659317 | 0.742970164 | 0.692839282 | 0.519055719 | 0.503213531 | 0.348432827 | 0.528419314 |
| GSM789180 | 0.183695295 | 0.468788095 | 0.780723716 | 0.605479444 | 0.705869983 | 0.565411237 | 0.209922177 | 0.934102774 | 0.405416683 | 0.773492331 | 0.841452415 | 0.428330497 | 0.322455144 | 0.976841095 | 0.473048449 | 0.707289345 | 0.252348861 | 0.759352672 | 0.703873064 | 0.51410416 | 0.543600923 | 0.333241727 | 0.593967814 |
| GSM789181 | 0.045947715 | 0.396233799 | 0.76215137 | 0.554130822 | 0.720967782 | 0.535811017 | 0.176186138 | 0.905673744 | 0.283959418 | 0.751337852 | 0.722997861 | 0.395620252 | 0.260455327 | 0.935355177 | 0.422427873 | 0.70263993 | 0.211038603 | 0.722249723 | 0.64801674 | 0.485156628 | 0.521627528 | 0.316462597 | 0.565586357 |
