# Supplementary material for: Identification of Fatty acid metabolism-Related Genes in the Progression from Non-Alcoholic Fatty Liver to Nonalcoholic fatty liver disease
Source: Research Square preprint supplement (doi:10.21203/rs.3.rs-5030401/v1), 2024-10-21
Supplement: Supplementary file 10 [file 90c455f331e379897a177a04.docx]

| ONTOLOGY | ID | Description | GeneRatio | BgRatio | pvalue | p.adjust | qvalue | geneID | Count |
| --- | --- | --- | --- | --- | --- | --- | --- | --- | --- |
| BP | GO:0032496 | response to lipopolysaccharide | 64/1945 | 326/18862 | 3.03E-07 | 0.001754927 | 0.001530321 | IL6/EDN1/ZC3H12A/CXCL9/FMO1/CCL2/TRIM5/ZFP36/ALPL/CXCL10/CASP1/CARD16/WNT5A/PELI1/TAC1/ADH5/PPARGC1A/FOXP1/AKAP12/FOS/IL10/CHMP5/SBNO2/TRIB1/CXCL1/SLC11A1/CX3CR1/CSF3/AKAP8/S100A14/TREM2/MGST1/LIAS/MAPKAPK2/THBD/LY86/ADM/CSF2RB/CXCL11/TIMP4/SERPINE1/ICAM1/ALAD/NOS3/IL1B/SIRPA/GJA1/TNFRSF1B/CTSG/IRAK2/CYP27B1/PRDX3/CCL5/SASH1/TNIP3/JUN/HPGD/CXCL2/CXCL13/TICAM1/FGF10/ATP4B/C5AR1/TBXA2R | 64 |
| BP | GO:0002237 | response to molecule of bacterial origin | 66/1945 | 346/18862 | 5.89E-07 | 0.001754927 | 0.001530321 | IL6/EDN1/ZC3H12A/CXCL9/FMO1/CCL2/TRIM5/ZFP36/ALPL/CXCL10/CD24/CASP1/CARD16/WNT5A/PELI1/TAC1/ADH5/PPARGC1A/FOXP1/AKAP12/FOS/IL10/CHMP5/SBNO2/TRIB1/CXCL1/SLC11A1/CX3CR1/CSF3/AKAP8/S100A14/TREM2/MGST1/LIAS/MAPKAPK2/THBD/LY86/ADM/CSF2RB/CXCL11/TIMP4/SERPINE1/ICAM1/ALAD/NOS3/IL1B/SIRPA/GJA1/TNFRSF1B/CTSG/IRAK2/CYP27B1/PRDX3/CCL5/SASH1/TNIP3/JUN/HPGD/CXCL2/CXCL13/TLR1/TICAM1/FGF10/ATP4B/C5AR1/TBXA2R | 66 |
| BP | GO:0071496 | cellular response to external stimulus | 57/1945 | 303/18862 | 5.27E-06 | 0.009050629 | 0.007892275 | ZC3H12A/FOSL1/FOXO1/FAM107A/NR4A2/SRF/INHBB/CASP1/UPP1/GOT1/LTBR/VPS41/CASP8AP2/WIPI1/TNFRSF1A/NUAK2/SIK1/FOS/LPL/MAP3K14/ZFYVE1/PRKAA2/ATF3/HABP4/TNFRSF10B/TLR7/USF1/PCSK9/TBL2/PIM1/DAPL1/CHEK1/CPEB4/RRAGB/TLR8/ICAM1/IL1B/MAG/IMPACT/FAS/RAC1/GJA1/FOXO3/CYP27B1/TLR3/CDKN1A/IL15/TNFRSF8/JUN/FNIP1/NFE2L2/MAP1LC3B/RNF152/MIOS/LAMP2/PRKAG1/EIF2AK2 | 57 |
| BP | GO:0010506 | regulation of autophagy | 60/1945 | 328/18862 | 7.51E-06 | 0.009050629 | 0.007892275 | ZC3H12A/FOXO1/EEF1A2/TRIM5/ERN1/SNX5/CASP1/NUPR1/TRIM22/ITPR1/ADRB2/VPS13C/RASIP1/GOLGA2/IL10/PRKAA2/SH3BP4/RAB8A/PRKAB2/FEZ2/ATP6V0D1/CHMP4A/TREM2/OPTN/NPC1/CDK5/DAPL1/C9orf72/TP53INP2/MTMR4/RRAGB/PIP4K2B/KLHL22/HTR2B/LEPR/ZKSCAN3/FOXO3/ATP6V1B2/SCFD1/KEAP1/PLEKHF1/HDAC6/MAP3K7/BCL2L11/ATP6V1A/RNF152/EXOC4/TICAM1/ABL2/ATP6V1D/ATP6V1E2/TRIM68/ROCK1/SCOC/PARK7/SMG1/PRKAG1/LAMP3/CISD2/ATP6V1H | 60 |
| BP | GO:0032642 | regulation of chemokine production | 24/1945 | 89/18862 | 7.59E-06 | 0.009050629 | 0.007892275 | EPHA2/IL6/IL4R/EGR1/KLF4/WNT5A/FOXP1/LPL/IL10/ADCYAP1/ARG2/TLR7/TREM2/TRIM32/IL1RL1/FFAR3/IL1B/SIRPA/TLR3/MAP2K5/TICAM1/DDX3X/APOD/EIF2AK2 | 24 |
| BP | GO:0006809 | nitric oxide biosynthetic process | 21/1945 | 73/18862 | 9.33E-06 | 0.009274991 | 0.008087922 | EDN1/ZC3H12A/PTGS2/PTX3/KLF4/IL10/SMAD3/CX3CR1/ATP2B4/ARG2/KHSRP/KLF2/NOS1AP/ICAM1/NOS3/IL1B/RAC1/SIRPA/GLA/TICAM1/GCHFR | 21 |
| BP | GO:0045428 | regulation of nitric oxide biosynthetic process | 18/1945 | 59/18862 | 1.65E-05 | 0.011333354 | 0.009882843 | EDN1/ZC3H12A/PTGS2/PTX3/KLF4/IL10/SMAD3/CX3CR1/ATP2B4/KHSRP/KLF2/NOS1AP/ICAM1/IL1B/RAC1/SIRPA/GLA/TICAM1 | 18 |
| BP | GO:0048545 | response to steroid hormone | 59/1945 | 330/18862 | 1.82E-05 | 0.011333354 | 0.009882843 | IL6/FOSB/EDN1/TYMS/GPAM/FOSL1/FOXO1/FAM107A/ZFP36/ALPL/PCNA/SPP1/GOT1/STC1/WBP2/FOXP1/SCNN1B/IGFBP2/FOS/IL10/TGFB3/TGFBR2/CNGA3/ADCYAP1/AXIN1/CALM3/GABRB1/THBS1/NR4A3/PMEPA1/TP63/KLF9/IL1RN/NPC1/IDH1/ADM/RNF14/VPS11/PAPPA/NR2C1/ICAM1/ALAD/NCOR1/BRCA1/ZMIZ1/CDKN1A/HDAC6/ESR2/ZFP36L2/BCL2L11/TFAP4/ESR1/CLOCK/TRIM68/TRH/OXT/TPH2/PARK7/UFSP2 | 59 |
| BP | GO:0046209 | nitric oxide metabolic process | 21/1945 | 77/18862 | 2.29E-05 | 0.011333354 | 0.009882843 | EDN1/ZC3H12A/PTGS2/PTX3/KLF4/IL10/SMAD3/CX3CR1/ATP2B4/ARG2/KHSRP/KLF2/NOS1AP/ICAM1/NOS3/IL1B/RAC1/SIRPA/GLA/TICAM1/GCHFR | 21 |
| BP | GO:0070482 | response to oxygen levels | 66/1945 | 385/18862 | 2.41E-05 | 0.011333354 | 0.009882843 | EPAS1/EDN1/MYC/PTGS2/FOXO1/EGR1/LPAR1/NR4A2/PSMD10/SRF/RWDD3/CD24/POLB/NOL3/APOLD1/CASP1/CARD16/ITPR1/STC1/PPARGC1A/SIRT4/VEGFC/TGFB3/TGFBR2/SMAD3/PSME2/ATP6V0D1/THBS1/USF1/TBL2/PSMD14/HIF3A/ADM/RBX1/PSMD1/CPEB4/APAF1/PSMB9/CCDC115/TGFBR3/ICAM1/ALAD/FAS/SCFD1/PLOD2/CDKN1A/LDHA/HIPK2/NPEPPS/KCNA5/CLCA1/PSMD7/VEGFA/ANGPTL4/ATP6V1A/NFE2L2/FAM162A/PSMB7/VHL/TRH/PSMB10/CYB5R4/ANGPT4/FUNDC1/SLC6A4/PSMD4 | 66 |
| BP | GO:0032602 | chemokine production | 24/1945 | 95/18862 | 2.50E-05 | 0.011333354 | 0.009882843 | EPHA2/IL6/IL4R/EGR1/KLF4/WNT5A/FOXP1/LPL/IL10/ADCYAP1/ARG2/TLR7/TREM2/TRIM32/IL1RL1/FFAR3/IL1B/SIRPA/TLR3/MAP2K5/TICAM1/DDX3X/APOD/EIF2AK2 | 24 |
| BP | GO:0042180 | cellular ketone metabolic process | 48/1945 | 254/18862 | 2.50E-05 | 0.011333354 | 0.009882843 | CYP7A1/AKR1A1/PTGS2/EGR1/AKR1B10/CEACAM1/PSMD10/PPARGC1A/SIRT4/DHRS9/PDP2/PRKAA2/CYP11A1/PRKAB2/PSME2/ATP2B4/CRYZL1/GPD1/NR4A3/PSMD14/ADM/NDUFA9/BMP5/PSMD1/PSMB9/CES1/OAZ2/PROX1/PANK2/COQ10A/IL1B/ACADL/NCOR1/BRCA1/PDSS2/FABP5/PSMD7/AIFM2/IRS2/PSMB7/CLCN2/PSMB10/PARK7/NMT1/CYP4F2/PSMD4/COQ5/ABCD2 | 48 |
| BP | GO:0080164 | regulation of nitric oxide metabolic process | 18/1945 | 61/18862 | 2.73E-05 | 0.011333354 | 0.009882843 | EDN1/ZC3H12A/PTGS2/PTX3/KLF4/IL10/SMAD3/CX3CR1/ATP2B4/KHSRP/KLF2/NOS1AP/ICAM1/IL1B/RAC1/SIRPA/GLA/TICAM1 | 18 |
| BP | GO:2001057 | reactive nitrogen species metabolic process | 21/1945 | 78/18862 | 2.84E-05 | 0.011333354 | 0.009882843 | EDN1/ZC3H12A/PTGS2/PTX3/KLF4/IL10/SMAD3/CX3CR1/ATP2B4/ARG2/KHSRP/KLF2/NOS1AP/ICAM1/NOS3/IL1B/RAC1/SIRPA/GLA/TICAM1/GCHFR | 21 |
| BP | GO:0050729 | positive regulation of inflammatory response | 30/1945 | 133/18862 | 2.85E-05 | 0.011333354 | 0.009882843 | IL6/C2CD4B/PTGS2/FABP4/TRADD/NUPR1/WNT5A/TAC1/NFKBIZ/TNFRSF1A/LPL/OSM/C2CD4A/PLA2G7/TLR7/TREM2/CCR2/IL1RL1/CREB3L3/FFAR3/NAPEPLD/SERPINE1/IL1B/TLR3/IL15/NLRP12/CLOCK/CEBPA/PARK7/S100A12 | 30 |
| BP | GO:0010948 | negative regulation of cell cycle process | 62/1945 | 359/18862 | 3.35E-05 | 0.012491356 | 0.010892637 | NDC80/BCL6/CCL2/FAM107A/CDK5RAP2/KLF4/PSMD10/SFN/PCNA/ZWINT/LIF/PPP1R10/DTL/MAD2L1/USP47/DONSON/CBX5/AURKA/PSME2/GPNMB/CDK6/VPS4A/GFI1B/MDM1/RBBP4/CNOT8/PTTG1/PSMD14/RBX1/CHEK1/PSMD1/DACT1/APAF1/PSMG2/PSMB9/FHL1/CDKN1B/KLHL22/BTG2/BRCA1/NANOS2/CCNF/BUB1/PHOX2B/CDKN1A/TOM1L1/XRCC3/PSMD7/TRIP13/C10orf99/ZFP36L2/RBL1/FOXE3/TFAP4/PSMB7/EED/PPP2R5B/FGF10/PSMB10/AURKB/PSMD4/NAE1 | 62 |
| BP | GO:0051384 | response to glucocorticoid | 30/1945 | 135/18862 | 3.85E-05 | 0.012751632 | 0.011119602 | IL6/FOSB/EDN1/TYMS/FOSL1/FOXO1/FAM107A/ZFP36/ALPL/PCNA/GOT1/STC1/IGFBP2/FOS/IL10/ADCYAP1/CALM3/KLF9/IL1RN/ADM/PAPPA/ICAM1/ALAD/CDKN1A/ZFP36L2/BCL2L11/TFAP4/TRH/OXT/TPH2 | 30 |
| BP | GO:0051783 | regulation of nuclear division | 30/1945 | 135/18862 | 3.85E-05 | 0.012751632 | 0.011119602 | EDN1/NDC80/NUSAP1/CDK5RAP2/EDN3/ZWINT/WNT5A/LIF/ANAPC7/MAD2L1/AURKA/RAD51AP1/MSX1/CDC23/PLCB1/CHEK1/NPM2/PSMG2/KLHL22/IL1B/ANAPC11/NANOS2/RCC1/BUB1/TOM1L1/XRCC3/SPHK1/TRIP13/STRA8/AURKB | 30 |
| BP | GO:0051607 | defense response to virus | 48/1945 | 260/18862 | 4.64E-05 | 0.013840468 | 0.012069081 | IL6/ZC3H12A/GPAM/OAS1/CXCL9/TRIM5/IFIT2/CXCL10/RTP4/TRIM22/TRAF3IP2/IFIT3/ELMOD2/IFI6/MAP3K14/RNASEL/TLR7/APOBEC3A/TRIM15/IFITM2/DHX58/POLR3C/ISG15/SKP2/DDX58/MICB/TLR8/IFI27/NLRP9/OASL/OAS2/MICA/SEC14L1/AKAP1/TLR3/DDX60/APOBEC3C/IL15/BST2/IFIH1/IFIT1/RSAD2/TICAM1/AGBL5/OAS3/IFNA8/TRAF3/EIF2AK2 | 48 |
| BP | GO:0140546 | defense response to symbiont | 48/1945 | 260/18862 | 4.64E-05 | 0.013840468 | 0.012069081 | IL6/ZC3H12A/GPAM/OAS1/CXCL9/TRIM5/IFIT2/CXCL10/RTP4/TRIM22/TRAF3IP2/IFIT3/ELMOD2/IFI6/MAP3K14/RNASEL/TLR7/APOBEC3A/TRIM15/IFITM2/DHX58/POLR3C/ISG15/SKP2/DDX58/MICB/TLR8/IFI27/NLRP9/OASL/OAS2/MICA/SEC14L1/AKAP1/TLR3/DDX60/APOBEC3C/IL15/BST2/IFIH1/IFIT1/RSAD2/TICAM1/AGBL5/OAS3/IFNA8/TRAF3/EIF2AK2 | 48 |
| BP | GO:0031667 | response to nutrient levels | 73/1945 | 451/18862 | 6.53E-05 | 0.017228707 | 0.015023673 | ZC3H12A/TYMS/FOXO1/CHSY1/FAM107A/ZFP36/ALPL/SRF/CXCL10/INHBB/SPP1/UPP1/STC1/PPARGC1A/VPS41/WIPI1/ENSA/ADRB2/IGFBP2/NUAK2/SIK1/LPL/ZFYVE1/TGFBR2/PRKAA2/BBS4/ATF3/ADCYAP1/LDLR/USF1/TMEM135/PCSK9/TBL2/PIM1/ADM/DAPL1/NUCB2/TTPA/CPEB4/RRAGB/SLC25A25/APAF1/PROX1/ICAM1/ALAD/PSPH/HMGCS1/IMPACT/FAS/FOXO3/GNPAT/CD3E/NPY/BBS2/CYP27B1/CDKN1A/IL15/LDHA/JUN/FNIP1/NFE2L2/ADRB1/MAP1LC3B/RNF152/MIOS/OXT/OGG1/TPH2/SLC6A4/LAMP2/PRKAG1/TBXA2R/EIF2AK2 | 73 |
| BP | GO:0031960 | response to corticosteroid | 32/1945 | 152/18862 | 6.63E-05 | 0.017228707 | 0.015023673 | IL6/FOSB/EDN1/TYMS/FOSL1/FOXO1/FAM107A/ZFP36/ALPL/PCNA/GOT1/STC1/SCNN1B/IGFBP2/FOS/IL10/CNGA3/ADCYAP1/CALM3/KLF9/IL1RN/ADM/PAPPA/ICAM1/ALAD/CDKN1A/ZFP36L2/BCL2L11/TFAP4/TRH/OXT/TPH2 | 32 |
| BP | GO:0045071 | negative regulation of viral genome replication | 16/1945 | 54/18862 | 7.14E-05 | 0.017228707 | 0.015023673 | OAS1/FAM111A/RNASEL/APOBEC3A/IFITM2/ISG15/PROX1/OASL/OAS2/CCL5/APOBEC3C/BST2/IFIT1/RSAD2/OAS3/EIF2AK2 | 16 |
| BP | GO:0070227 | lymphocyte apoptotic process | 19/1945 | 71/18862 | 7.36E-05 | 0.017228707 | 0.015023673 | GPAM/BCL6/WNT5A/CD3G/TRAF3IP2/FOXP1/IL10/ARG2/GIMAP8/FAS/GLI3/JAK3/DFFA/CCL5/ZC3H8/BCL2L11/FNIP1/IRS2/AURKB | 19 |
| BP | GO:0030728 | ovulation | 8/1945 | 16/18862 | 7.58E-05 | 0.017228707 | 0.015023673 | IL4R/INHBB/ADAMTS1/GAS2/TNFAIP6/IMMP2L/RGS2/HPGD | 8 |
| BP | GO:0048525 | negative regulation of viral process | 22/1945 | 89/18862 | 7.64E-05 | 0.017228707 | 0.015023673 | OAS1/TRIM5/PTX3/ZFP36/FAM111A/HEXIM1/RNASEL/TRIM32/APOBEC3A/TRIM15/IFITM2/ISG15/PROX1/OASL/OAS2/CCL5/APOBEC3C/BST2/IFIT1/RSAD2/OAS3/EIF2AK2 | 22 |
| BP | GO:0009991 | response to extracellular stimulus | 76/1945 | 477/18862 | 7.92E-05 | 0.017228707 | 0.015023673 | ZC3H12A/TYMS/FOSL1/FOXO1/CHSY1/FAM107A/ZFP36/NR4A2/ALPL/SRF/CXCL10/INHBB/SPP1/UPP1/STC1/PPARGC1A/VPS41/WIPI1/ENSA/ADRB2/IGFBP2/NUAK2/SIK1/FOS/LPL/ZFYVE1/TGFBR2/PRKAA2/BBS4/ATF3/ADCYAP1/LDLR/USF1/TMEM135/PCSK9/TBL2/PIM1/ADM/DAPL1/NUCB2/TTPA/CPEB4/RRAGB/SLC25A25/APAF1/PROX1/ICAM1/ALAD/PSPH/HMGCS1/IMPACT/FAS/FOXO3/GNPAT/CD3E/NPY/BBS2/CYP27B1/CDKN1A/IL15/LDHA/JUN/FNIP1/NFE2L2/ADRB1/MAP1LC3B/RNF152/MIOS/OXT/OGG1/TPH2/SLC6A4/LAMP2/PRKAG1/TBXA2R/EIF2AK2 | 76 |
| BP | GO:0051091 | positive regulation of DNA-binding transcription factor activity | 48/1945 | 266/18862 | 8.35E-05 | 0.017228707 | 0.015023673 | IL6/EDN1/FOSL1/TRIM5/PPRC1/SRF/TRADD/IKBKB/ARID5B/CARD16/WNT5A/TRIM22/CRTC3/PPARGC1A/IL18RAP/COPS5/IL10/SMAD3/FLOT2/CX3CR1/CSF3/TRIM32/TRIM15/PLA2G1B/DDX58/ARHGEF5/ICAM1/IL1B/IRAK2/TAF12/PRDX3/TLR3/CD40LG/HIPK2/SPHK1/ESR2/VEGFA/MAP3K7/ESR1/PPP2R5B/CLOCK/TICAM1/TRIM68/PARK7/RPS6KA5/S100A12/TP53BP1/EIF2AK2 | 48 |
| BP | GO:1901990 | regulation of mitotic cell cycle phase transition | 71/1945 | 439/18862 | 8.38E-05 | 0.017228707 | 0.015023673 | NDC80/CETN2/CCL2/FAM107A/CDK5RAP2/KLF4/PSMD10/ANLN/SFN/NINL/PCNA/ZWINT/ADAMTS1/ANAPC7/DTL/HMMR/TUBG1/MAD2L1/RAD51C/USP47/DONSON/AURKA/PSME2/GPNMB/CDK6/VPS4A/GFI1B/CDC23/CEP290/CSNK1E/CNOT8/PSMD14/RBX1/PLCB1/CHEK1/CEP78/PSMD1/NPM2/DACT1/PSMG2/PSMB9/FHL1/CDKN1B/UBD/KLHL22/ANAPC11/BTG2/CEP250/CEP63/HSPA2/BRCA1/BUB1/PHOX2B/CDKN1A/KCNA5/XRCC3/PSMD7/CEP152/TRIP13/CEP70/ZFP36L2/NEDD1/RBL1/TFAP4/PSMB7/FGF10/DDX3X/PSMB10/AURKB/PSMD4/NAE1 | 71 |
| BP | GO:0045926 | negative regulation of growth | 45/1945 | 245/18862 | 8.94E-05 | 0.017774144 | 0.015499302 | BCL6/SOCS2/WNT3/SPP1/TNR/WNT5A/ING4/ADRB2/IP6K2/TGFBR2/SMAD3/SH3BP4/SOX17/WT1/MSX1/SEMA4B/MT1B/RGS2/CDK5/FHL1/SCGB3A1/CDKN1B/MAG/GJA1/MT1X/BBS2/CYP27B1/NDRG3/SEMA6D/MT2A/CDKN1A/MT1M/BST2/CRLF3/MEIS1/PPT1/ESR2/PI16/PSRC1/ADRB1/PLXNA3/PTK6/DDX3X/SLC6A4/EI24 | 45 |
| BP | GO:0120162 | positive regulation of cold-induced thermogenesis | 23/1945 | 97/18862 | 0.00010559 | 0.020307426 | 0.01770836 | EPAS1/IL4R/FABP4/PER2/PPARGC1A/ADRB2/PRKAB2/ADCYAP1/CCR2/GADD45G/GATM/ELOVL6/ACADL/GJA1/LEPR/PHOX2B/FABP5/VEGFA/ADRB1/TRPM8/HADH/KDM6B/OXT | 23 |
| BP | GO:0008217 | regulation of blood pressure | 35/1945 | 177/18862 | 0.000118368 | 0.022053469 | 0.019230933 | EDN1/TRHDE/ACE2/PTGS2/CALCA/GPR37L1/EDN3/SNX5/TAC1/ADH5/ADRB2/NPR3/VEGFC/SMAD3/P2RX1/PDE4D/ADM/COL1A2/CTSZ/CES1/FFAR3/NOS3/GJA1/CTSG/TAC3/NPY/ECE1/SCPEP1/ADRB1/PTPRO/OXT/CAMK2N1/CYP4F2/ERAP1/TBXA2R | 35 |
| BP | GO:0045444 | fat cell differentiation | 41/1945 | 221/18862 | 0.000143707 | 0.025963092 | 0.022640179 | IL6/ZC3H12A/NR4A1/SOCS1/PTGS2/FOXO1/FABP4/PER2/TCF7L2/ZFP36/NR4A2/KLF4/ARID5B/INHBB/CDS1/KLF5/WNT5A/PPARGC1A/ADRB2/LPL/BBS4/SMAD3/CBY1/RNASEL/TRIM32/NR4A3/PIM1/RGS2/PLCB1/NAPEPLD/MAFB/FNDC5/BBS2/HDAC6/LRG1/ZFP36L2/ADRB1/IL11/FGF10/CEBPA/ERAP1 | 41 |
| BP | GO:1902042 | negative regulation of extrinsic apoptotic signaling pathway via death domain receptors | 13/1945 | 41/18862 | 0.000157398 | 0.027600135 | 0.024067704 | TRADD/ITPRIP/TNFRSF10B/BMP5/RFFL/SERPINE1/ICAM1/NOS3/FAS/TNFSF10/BRCA1/DDX3X/PARK7 | 13 |
| BP | GO:0048340 | paraxial mesoderm morphogenesis | 6/1945 | 10/18862 | 0.000173546 | 0.029562312 | 0.02577875 | FOXC1/WNT5A/FOXC2/SMAD3/BMPR1A/EXOC4 | 6 |
| BP | GO:0003018 | vascular process in circulatory system | 44/1945 | 245/18862 | 0.000180525 | 0.029664472 | 0.025867834 | EDN1/ACE2/C2CD4B/SLC7A2/PER2/CALCA/CEACAM1/EDN3/FOXC1/SCNN1B/ADRB2/FOXC2/AKAP12/ITGB1BP1/ATP2B4/SLC8A2/ABCC5/ABCC4/C2CD4A/SLC5A1/P2RX1/SLCO1C1/SLC2A3/RGS2/ADM/SLC22A8/KLF2/ICAM1/NOS3/HTR2B/GJA1/LEPR/BBS2/ECE1/SCPEP1/FABP5/KCNA5/VEGFA/ADCY6/ADRB1/ROCK1/SLC6A4/SLC4A8/TBXA2R | 44 |
| BP | GO:0009612 | response to mechanical stimulus | 38/1945 | 202/18862 | 0.000184097 | 0.029664472 | 0.025867834 | FOSB/EDN1/FOSL1/CXCL10/CNTNAP2/CASP1/GOT1/PKD1L1/LTBR/CASP8AP2/TNFRSF1A/IGFBP2/FOS/MAP3K14/TGFBR2/HABP4/CHRNA10/TNFRSF10B/TLR7/THBS1/CHEK1/XPA/TLR8/PSPH/GDF5/IL1B/BTG2/MAG/FAS/RAC1/GJA1/STRC/TLR3/KCNA5/TNFRSF8/JUN/ERCC8/PDZD7 | 38 |
| BP | GO:0035296 | regulation of tube diameter | 27/1945 | 127/18862 | 0.000201005 | 0.030728047 | 0.026795287 | EDN1/ACE2/PER2/CALCA/EDN3/FOXC1/SCNN1B/ADRB2/FOXC2/ITGB1BP1/P2RX1/RGS2/ADM/KLF2/ICAM1/NOS3/HTR2B/GJA1/BBS2/ECE1/SCPEP1/KCNA5/ADCY6/ADRB1/ROCK1/SLC6A4/TBXA2R | 27 |
| BP | GO:0097746 | blood vessel diameter maintenance | 27/1945 | 127/18862 | 0.000201005 | 0.030728047 | 0.026795287 | EDN1/ACE2/PER2/CALCA/EDN3/FOXC1/SCNN1B/ADRB2/FOXC2/ITGB1BP1/P2RX1/RGS2/ADM/KLF2/ICAM1/NOS3/HTR2B/GJA1/BBS2/ECE1/SCPEP1/KCNA5/ADCY6/ADRB1/ROCK1/SLC6A4/TBXA2R | 27 |
| BP | GO:0002675 | positive regulation of acute inflammatory response | 10/1945 | 27/18862 | 0.000215056 | 0.031182045 | 0.027191179 | IL6/C2CD4B/PTGS2/TAC1/OSM/C2CD4A/CREB3L3/FFAR3/IL1B/PARK7 | 10 |
| BP | GO:1903900 | regulation of viral life cycle | 30/1945 | 148/18862 | 0.000223937 | 0.031182045 | 0.027191179 | OAS1/TRIM5/PTX3/VPS37B/TRIM22/FAM111A/TOP2A/RNASEL/TRIM32/VPS4A/APOBEC3A/TRIM15/IFITM2/ISG15/PROX1/OASL/OAS2/TMPRSS2/CCL5/APOBEC3C/BST2/TYRO3/PPIE/IFIT1/RSAD2/TRIM68/DDX3X/OAS3/LAMP3/EIF2AK2 | 30 |
| BP | GO:1902041 | regulation of extrinsic apoptotic signaling pathway via death domain receptors | 16/1945 | 59/18862 | 0.000225837 | 0.031182045 | 0.027191179 | TRADD/ITPRIP/ATF3/TNFRSF10B/THBS1/BMP5/RFFL/SERPINE1/ICAM1/NOS3/FAS/TNFSF10/BRCA1/TIMP3/DDX3X/PARK7 | 16 |
| BP | GO:0034341 | response to interferon-gamma | 37/1945 | 197/18862 | 0.000229698 | 0.031182045 | 0.027191179 | EDN1/OAS1/SOCS1/CCL2/TRIM5/SOCS3/RAB43/CASP1/WNT5A/TRIM22/AQP4/GBP5/SLC11A1/GBP7/SLC26A6/CDC42EP2/CCL7/RPL13A/IFITM2/STX8/CCL18/UBD/ICAM1/OASL/OAS2/SIRPA/CYP27B1/VAMP3/CCL5/MT2A/TLR3/BST2/PARP14/HLA-A/TRIM68/OAS3/WAS | 37 |
| BP | GO:0035150 | regulation of tube size | 27/1945 | 128/18862 | 0.000230126 | 0.031182045 | 0.027191179 | EDN1/ACE2/PER2/CALCA/EDN3/FOXC1/SCNN1B/ADRB2/FOXC2/ITGB1BP1/P2RX1/RGS2/ADM/KLF2/ICAM1/NOS3/HTR2B/GJA1/BBS2/ECE1/SCPEP1/KCNA5/ADCY6/ADRB1/ROCK1/SLC6A4/TBXA2R | 27 |
| BP | GO:0031349 | positive regulation of defense response | 59/1945 | 361/18862 | 0.000242418 | 0.031195726 | 0.02720311 | IL6/C2CD4B/PTGS2/TRIM5/FABP4/PSMD10/TRADD/IKBKB/NUPR1/WNT5A/TAC1/NFKBIZ/IL18RAP/GBP5/TNFRSF1A/SH2D1A/LPL/HEXIM1/PSME2/OSM/CD160/C2CD4A/PLA2G7/TLR7/TREM2/OPTN/PSMD14/POLR3C/CCR2/PSMD1/IL1RL1/CREB3L3/PSMB9/TLR8/FFAR3/NAPEPLD/SERPINE1/IL1B/SLAMF6/GJA1/CCL5/TLR3/IL15/PSMD7/MAP3K7/KLRD1/PRKACB/PSMB7/NLRP12/CLOCK/CLEC4D/PSMB10/CEBPA/PGC/PARK7/RPS6KA5/MUC16/PSMD4/S100A12 | 59 |
| BP | GO:0044344 | cellular response to fibroblast growth factor stimulus | 29/1945 | 142/18862 | 0.000247346 | 0.031195726 | 0.02720311 | SPRY4/NR4A1/CCL2/FGFR1/KLB/ZFP36/EGR3/SULF2/SPRY2/WNT5A/ITGB1BP1/TIA1/THBS1/NPTN/KIF16B/POLR2G/KDM5B/FRS2/CCL5/DSTYK/SPRY1/GALNT3/ZFP36L2/CXCL13/NDST1/KL/FGF10/FGF9/FGFRL1 | 29 |
| BP | GO:0032091 | negative regulation of protein binding | 22/1945 | 96/18862 | 0.000249735 | 0.031195726 | 0.02720311 | FRMD7/IFIT2/CARD16/ADRB2/GOLGA2/IL10/AURKA/ITGB1BP1/CSNK1E/PCSK9/CTSZ/DACT1/ACTB/CDKN1A/IFIT1/NFATC4/EFHB/AURKB/ROCK1/PARK7/DKK1/SYMPK | 22 |
| BP | GO:0043281 | regulation of cysteine-type endopeptidase activity involved in apoptotic process | 38/1945 | 205/18862 | 0.000251156 | 0.031195726 | 0.02720311 | VIL1/MYC/GRAMD4/KLF4/TRADD/ARL6IP5/SFN/NOL3/CASP1/CARD16/CASP8AP2/IFI6/USP47/SERPINB9/SMAD3/TNFRSF10B/SOX7/THBS1/P2RX1/PLAUR/TP63/LCK/RFFL/APAF1/FAS/TNFSF10/COL4A3/PRDX3/MAP2K5/VEGFA/BCL2L11/FNIP1/FAM162A/TFAP4/NLRP12/DDX3X/PARK7/LAMP3 | 38 |
| BP | GO:0001919 | regulation of receptor recycling | 9/1945 | 23/18862 | 0.000275223 | 0.032279679 | 0.028148332 | CHMP5/OPTN/PCSK9/KIF16B/VAMP3/ECE1/BVES/TRAT1/NSF | 9 |
| BP | GO:0000819 | sister chromatid segregation | 37/1945 | 199/18862 | 0.000282684 | 0.032279679 | 0.028148332 | DSN1/NDC80/NUSAP1/HDAC8/RACGAP1/CDK5RAP2/ZWINT/ANAPC7/TUBG1/NCAPG2/CHMP5/MAD2L1/RAD51C/TOP2A/RRS1/FEN1/AKAP8/CHMP4A/VPS4A/CDC23/SMC2/PTTG1/PSMG2/KLHL22/ANAPC11/TUBG2/NCAPD2/BUB1/NUF2/XRCC3/TRIP13/CENPK/SMC4/PSRC1/AXIN2/AURKB/KIF22 | 37 |
| BP | GO:0043154 | negative regulation of cysteine-type endopeptidase activity involved in apoptotic process | 18/1945 | 72/18862 | 0.000286699 | 0.032279679 | 0.028148332 | VIL1/KLF4/SFN/NOL3/CARD16/IFI6/USP47/SERPINB9/THBS1/PLAUR/RFFL/PRDX3/MAP2K5/VEGFA/FNIP1/DDX3X/PARK7/LAMP3 | 18 |
| BP | GO:0010565 | regulation of cellular ketone metabolic process | 35/1945 | 185/18862 | 0.00028965 | 0.032279679 | 0.028148332 | CYP7A1/PTGS2/EGR1/CEACAM1/PSMD10/PPARGC1A/SIRT4/PDP2/PRKAA2/PRKAB2/PSME2/ATP2B4/NR4A3/PSMD14/ADM/BMP5/PSMD1/PSMB9/CES1/OAZ2/PROX1/PANK2/IL1B/ACADL/NCOR1/BRCA1/FABP5/PSMD7/IRS2/PSMB7/CLCN2/PSMB10/PARK7/PSMD4/ABCD2 | 35 |
| BP | GO:0000070 | mitotic sister chromatid segregation | 32/1945 | 164/18862 | 0.000291767 | 0.032279679 | 0.028148332 | DSN1/NDC80/NUSAP1/RACGAP1/CDK5RAP2/ZWINT/ANAPC7/TUBG1/NCAPG2/CHMP5/MAD2L1/RRS1/AKAP8/CHMP4A/VPS4A/CDC23/SMC2/PTTG1/PSMG2/KLHL22/ANAPC11/TUBG2/NCAPD2/BUB1/NUF2/XRCC3/TRIP13/CENPK/SMC4/PSRC1/AURKB/KIF22 | 32 |
| BP | GO:0001659 | temperature homeostasis | 33/1945 | 171/18862 | 0.000292369 | 0.032279679 | 0.028148332 | EPAS1/IL4R/PTGS2/FOXO1/EGR1/FABP4/PER2/PPARGC1A/ADRB2/FOXC2/NPR3/PRKAB2/ADCYAP1/LAMA4/ACVR2B/CCR2/GADD45G/NAPEPLD/GATM/ELOVL6/IL1B/ACADL/GJA1/LEPR/PHOX2B/IL15/FABP5/VEGFA/ADRB1/TRPM8/HADH/KDM6B/OXT | 33 |
| BP | GO:0040001 | establishment of mitotic spindle localization | 11/1945 | 33/18862 | 0.000306564 | 0.033082524 | 0.028848423 | UBXN2B/NDC80/NUSAP1/CDK5RAP2/SPRY2/MAD2L1/DYNLT1/CLASP2/GJA1/SPRY1/FGF10 | 11 |
| BP | GO:0042110 | T cell activation | 73/1945 | 474/18862 | 0.000310738 | 0.033082524 | 0.028848423 | BCL3/IL6/ZC3H12A/GPAM/IL4R/SOCS1/BCL6/CCL2/EGR1/NHEJ1/TMEM98/SDC4/CEACAM1/BTN3A1/SRF/MR1/EGR3/CSK/CD24/RABL3/PELI1/CD3G/CD2/NFKBIZ/FOXP1/IGFBP2/IL10/MAP3K8/TGFBR2/LY9/SMAD3/SLC11A1/FLOT2/GPNMB/CD160/ARG2/CD151/LCK/CCR2/MICB/NFATC2/CTLA4/MAFB/ICAM1/IL1B/SIT1/RAC1/EBI3/SLAMF6/SIRPA/TNFRSF1B/LEPR/GLI3/JAK3/CD3E/MICA/ZMIZ1/HHLA2/CCL5/IL15/CD40LG/CDH26/ZC3H8/ZFP36L2/RSAD2/SIRPB1/DTX1/NCKAP1L/RAG2/HLA-A/PSMB10/IFNA8/WAS | 73 |
| BP | GO:0071356 | cellular response to tumor necrosis factor | 50/1945 | 296/18862 | 0.000318852 | 0.033108123 | 0.028870747 | EDN1/ZC3H12A/CCL2/FABP4/CALCA/ZFP36/PSMD10/TRADD/IKBKB/NOL3/CASP1/CARD16/LTBR/PPARGC1A/HAS2/TNFRSF1A/AKAP12/MAP3K14/PSME2/GPD1/THBS1/CCL7/TRIM32/PSMD14/CCL18/PSMD1/RFFL/PSMB9/EDAR/KLF2/ICAM1/FAS/BAG4/TNFRSF1B/FOXO3/BRCA1/CCL5/CD40LG/PSMD7/SPHK1/TNFRSF8/ZFP36L2/EDARADD/SPATA2/NFE2L2/PSMB7/PSMB10/CEBPA/TRAF3/PSMD4 | 50 |
| BP | GO:0050792 | regulation of viral process | 35/1945 | 186/18862 | 0.000322085 | 0.033108123 | 0.028870747 | OAS1/MDFIC/TRIM5/PTX3/ZFP36/VPS37B/TRIM22/FAM111A/HEXIM1/TOP2A/RNASEL/TRIM32/VPS4A/APOBEC3A/TRIM15/IFITM2/ISG15/POLR2G/DYNLT1/PROX1/OASL/OAS2/TMPRSS2/CCL5/APOBEC3C/BST2/TYRO3/PPIE/IFIT1/RSAD2/TRIM68/DDX3X/OAS3/LAMP3/EIF2AK2 | 35 |
| BP | GO:0043406 | positive regulation of MAP kinase activity | 41/1945 | 230/18862 | 0.000345418 | 0.034339043 | 0.029944126 | EDN1/TNIK/MDFIC/FGFR1/LPAR1/ERN1/GADD45B/CSK/CD24/EDN3/WNT5A/TGFB3/DUSP6/DUSP5/NTRK3/THBS1/PROK2/MAPKAPK2/PLA2G1B/GADD45G/ARHGEF5/IL1B/HTR2B/IGFBP6/FRS2/ERP29/IRAK2/RET/CD40LG/PBK/MAP2K5/SASH1/VEGFA/MAP3K7/FGD2/FGF10/DUSP9/DKK1/C5AR1/S100A12/PROK1 | 41 |
| BP | GO:0051090 | regulation of DNA-binding transcription factor activity | 69/1945 | 444/18862 | 0.000345579 | 0.034339043 | 0.029944126 | IL6/EDN1/ZC3H12A/FOSL1/TRIM5/TCF7L2/PPRC1/KLF4/PSMD10/SRF/TRADD/IKBKB/RWDD3/ARID5B/NUPR1/CARD16/WNT5A/TRIM22/PELI1/CRTC3/PPARGC1A/IL18RAP/COPS5/SIK1/FOS/IL10/TRIB1/SMAD3/FLOT2/CX3CR1/ADORA3/CSF3/TRIM32/TRIM15/PIM1/PLA2G1B/DDX58/ARHGEF5/PROX1/ICAM1/MAPK9/IL1B/IRAK2/TAF12/KEAP1/PRDX3/TLR3/CD40LG/HIPK2/MAP2K5/SPHK1/ESR2/VEGFA/MAP3K7/JUN/CCDC22/ESR1/NLRP12/PPP2R5B/CLOCK/TICAM1/TRIM68/COMMD6/PARK7/TRAF3/RPS6KA5/S100A12/TP53BP1/EIF2AK2 | 69 |
| BP | GO:0071900 | regulation of protein serine/threonine kinase activity | 75/1945 | 492/18862 | 0.000354001 | 0.034599229 | 0.030171011 | SPRY4/EDN1/TNIK/CCNG2/MDFIC/CDKN3/FGFR1/LPAR1/ERN1/PSMD10/CXCL10/LATS2/GADD45B/SFN/CSK/CD24/EDN3/SPRY2/WNT5A/SERTAD1/ADRB2/RASIP1/TGFB3/TRIB1/DUSP6/HEXIM1/ATP2B4/DUSP5/SLC8A2/CIT/CALM3/NTRK3/THBS1/PKIB/PROK2/MAPKAPK2/RGS2/PLA2G1B/DUSP8/NPFFR2/GADD45G/ARHGEF5/CDKN1B/PROX1/IL1B/HTR2B/IGFBP6/FRS2/ERP29/IRAK2/CCNF/ACTB/SPRY1/CDKN1A/RET/CD40LG/PBK/MAP2K5/SASH1/VEGFA/MAP3K7/CKS1B/FGD2/PSRC1/TFAP4/FGF10/DDX3X/CEBPA/DUSP9/DKK1/PRKAG1/STK38/C5AR1/S100A12/PROK1 | 75 |
| BP | GO:0051100 | negative regulation of binding | 31/1945 | 159/18862 | 0.000365046 | 0.034918236 | 0.03044919 | FRMD7/PER2/IFIT2/CARD16/ADRB2/GOLGA2/IL10/AURKA/HABP4/ITGB1BP1/GZMA/MSX1/CSNK1E/PCSK9/ZNF462/CTSZ/DACT1/ENHO/ACTB/CDKN1A/IFIT1/NFATC4/JUN/TFAP4/EFHB/ZFP90/AURKB/ROCK1/PARK7/DKK1/SYMPK | 31 |
| BP | GO:0009615 | response to virus | 58/1945 | 359/18862 | 0.000368978 | 0.034918236 | 0.03044919 | BCL3/IL6/ZC3H12A/GPAM/OAS1/CXCL9/FOSL1/TRIM5/IFIT2/CXCL10/IKBKB/RTP4/TRIM22/TRAF3IP2/IFIT3/ELMOD2/ITGB8/IFI6/MAP3K14/CDK6/RNASEL/TLR7/APOBEC3A/TRIM15/IFI44/IFITM2/DHX58/POLR3C/ISG15/SKP2/AP1S1/DDX58/MICB/TLR8/IFI27/NLRP9/OASL/BATF3/OAS2/MICA/SEC14L1/CCL5/AKAP1/TLR3/DDX60/APOBEC3C/IL15/BST2/IFIH1/IFIT1/RSAD2/TICAM1/AGBL5/DDX3X/OAS3/IFNA8/TRAF3/EIF2AK2 | 58 |
| BP | GO:1903426 | regulation of reactive oxygen species biosynthetic process | 22/1945 | 99/18862 | 0.000395779 | 0.036056482 | 0.031441756 | EDN1/ZC3H12A/PTGS2/PTX3/KLF4/IL10/SMAD3/CX3CR1/ATP2B4/ARG2/KHSRP/KLF2/NOS1AP/ICAM1/IL1B/RAC1/SIRPA/GLA/CTNS/TICAM1/PARK7/ABCD2 | 22 |
| BP | GO:2000117 | negative regulation of cysteine-type endopeptidase activity | 19/1945 | 80/18862 | 0.000399001 | 0.036056482 | 0.031441756 | VIL1/KLF4/SFN/NOL3/CARD16/IFI6/USP47/SERPINB9/THBS1/PLAUR/RFFL/CSN2/PRDX3/MAP2K5/VEGFA/FNIP1/DDX3X/PARK7/LAMP3 | 19 |
| BP | GO:1901987 | regulation of cell cycle phase transition | 73/1945 | 478/18862 | 0.000399149 | 0.036056482 | 0.031441756 | NDC80/CETN2/CCL2/FAM107A/CDK5RAP2/KLF4/PSMD10/ANLN/SFN/NINL/PCNA/ZWINT/ADAMTS1/ANAPC7/DTL/HMMR/TUBG1/MAD2L1/RAD51C/USP47/DONSON/AURKA/PSME2/GPNMB/CDK6/ATP2B4/VPS4A/GFI1B/CDC23/CEP290/CSNK1E/CNOT8/PSMD14/RBX1/PLCB1/CHEK1/CEP78/PSMD1/NPM2/DACT1/PSMG2/PSMB9/FHL1/CDKN1B/UBD/KLHL22/ANAPC11/BTG2/CEP250/CEP63/HSPA2/BRCA1/BUB1/PHOX2B/CDKN1A/KCNA5/XRCC3/PSMD7/CEP152/TRIP13/C10orf99/CEP70/ZFP36L2/NEDD1/RBL1/TFAP4/PSMB7/FGF10/DDX3X/PSMB10/AURKB/PSMD4/NAE1 | 73 |
| BP | GO:0071260 | cellular response to mechanical stimulus | 18/1945 | 74/18862 | 0.000411803 | 0.036502861 | 0.031831005 | CASP1/GOT1/LTBR/CASP8AP2/TNFRSF1A/MAP3K14/HABP4/TNFRSF10B/TLR7/CHEK1/TLR8/IL1B/MAG/FAS/RAC1/GJA1/TLR3/TNFRSF8 | 18 |
| BP | GO:0010389 | regulation of G2/M transition of mitotic cell cycle | 37/1945 | 203/18862 | 0.000422458 | 0.036502861 | 0.031831005 | CETN2/CDK5RAP2/PSMD10/NINL/DTL/HMMR/TUBG1/RAD51C/USP47/DONSON/AURKA/PSME2/VPS4A/CEP290/CSNK1E/PSMD14/RBX1/CHEK1/CEP78/PSMD1/PSMB9/FHL1/CEP250/CEP63/HSPA2/BRCA1/PHOX2B/CDKN1A/PSMD7/CEP152/CEP70/NEDD1/PSMB7/PSMB10/AURKB/PSMD4/NAE1 | 37 |
| BP | GO:0046890 | regulation of lipid biosynthetic process | 37/1945 | 203/18862 | 0.000422458 | 0.036502861 | 0.031831005 | CYP7A1/GPAM/PTGS2/EGR1/CEACAM1/SQLE/PPARGC1A/TNFRSF1A/SIRT4/SIK1/PRKAA2/PRKAB2/SORBS1/LDLR/FDFT1/IDH1/ADM/BMP5/THRSP/CES1/PMVK/PROX1/ELOVL6/IL1B/HMGCS1/ACADL/HTR2B/BRCA1/CYP27B1/ENHO/MVK/FABP5/SPHK1/IDI1/CLCN2/NFYB/ABCD2 | 37 |
| BP | GO:0035148 | tube formation | 28/1945 | 140/18862 | 0.000448145 | 0.038169146 | 0.033284029 | SDC4/WNT5A/TEAD2/BBS4/PODXL/ITGB1BP1/LIAS/CEP290/MIB1/SPINT2/IRX3/ADM/BMP5/APAF1/EDAR/SALL4/PROX1/PHACTR4/OSR1/IFT52/RET/VEGFA/BCL2L11/HESX1/TMED2/PRKACB/FGF10/IRX2 | 28 |
| BP | GO:0035967 | cellular response to topologically incorrect protein | 32/1945 | 168/18862 | 0.000455587 | 0.038256476 | 0.033360182 | PPP1R15A/CCL2/FKBP14/ERN1/WIPI1/COPS5/RNF185/RNF121/KDELR3/ATF3/IGFBP1/ATP6V0D1/OPTN/RHBDD2/TBL2/CREB3L3/GOSR2/DERL3/DNAJB14/KLHL15/HSPA2/DERL2/RNF175/CREB3L4/HDAC6/BCL2L11/TMED2/RNF126/NFE2L2/PPP2R5B/EXTL2/YOD1 | 32 |
| BP | GO:0043903 | regulation of biological process involved in symbiotic interaction | 36/1945 | 197/18862 | 0.000476717 | 0.039474787 | 0.034422566 | OAS1/MDFIC/TRIM5/PTX3/ZFP36/VPS37B/TRIM22/FAM111A/HEXIM1/TOP2A/RNASEL/TRIM32/VPS4A/APOBEC3A/TRIM15/IFITM2/ISG15/POLR2G/DYNLT1/PROX1/OASL/OAS2/TMPRSS2/CCL5/APOBEC3C/BST2/TYRO3/PPIE/IFIT1/RSAD2/KRT6A/TRIM68/DDX3X/OAS3/LAMP3/EIF2AK2 | 36 |
| BP | GO:1902895 | positive regulation of pri-miRNA transcription by RNA polymerase II | 12/1945 | 40/18862 | 0.000496383 | 0.040003906 | 0.034883965 | FOSL1/EGR1/KLF4/SRF/KLF5/FOS/IL10/SMAD3/WT1/FOXO3/BMPR1A/JUN | 12 |
| BP | GO:0051785 | positive regulation of nuclear division | 15/1945 | 57/18862 | 0.000499902 | 0.040003906 | 0.034883965 | EDN1/NUSAP1/EDN3/WNT5A/ANAPC7/AURKA/RAD51AP1/MSX1/CDC23/PLCB1/NPM2/IL1B/ANAPC11/SPHK1/STRA8 | 15 |
| BP | GO:0001666 | response to hypoxia | 56/1945 | 348/18862 | 0.000509654 | 0.040003906 | 0.034883965 | EPAS1/EDN1/MYC/PTGS2/EGR1/NR4A2/PSMD10/SRF/RWDD3/CD24/NOL3/APOLD1/CASP1/CARD16/ITPR1/STC1/PPARGC1A/SIRT4/VEGFC/TGFB3/TGFBR2/SMAD3/PSME2/THBS1/USF1/TBL2/PSMD14/HIF3A/ADM/RBX1/PSMD1/APAF1/PSMB9/TGFBR3/ICAM1/ALAD/SCFD1/PLOD2/LDHA/HIPK2/NPEPPS/KCNA5/CLCA1/PSMD7/VEGFA/ANGPTL4/NFE2L2/FAM162A/PSMB7/VHL/TRH/PSMB10/ANGPT4/FUNDC1/SLC6A4/PSMD4 | 56 |
| BP | GO:0071774 | response to fibroblast growth factor | 29/1945 | 148/18862 | 0.000509946 | 0.040003906 | 0.034883965 | SPRY4/NR4A1/CCL2/FGFR1/KLB/ZFP36/EGR3/SULF2/SPRY2/WNT5A/ITGB1BP1/TIA1/THBS1/NPTN/KIF16B/POLR2G/KDM5B/FRS2/CCL5/DSTYK/SPRY1/GALNT3/ZFP36L2/CXCL13/NDST1/KL/FGF10/FGF9/FGFRL1 | 29 |
| BP | GO:0045787 | positive regulation of cell cycle | 62/1945 | 395/18862 | 0.000517214 | 0.040047166 | 0.034921689 | EDN1/UBXN2B/NDC80/NUSAP1/FOSL1/RACGAP1/PSMD10/SPAST/SFN/PCNA/EDN3/NUPR1/ADAMTS1/WNT5A/PPP1R10/ANAPC7/DTL/CENPV/IL10/MAD2L1/RAD51C/AURKA/RAD51AP1/FEN1/THOC5/MSX1/CIT/TRIM32/CDC23/CNOT8/PLCB1/CHEK1/NPM2/CDKN1B/PROX1/IL1B/ANAPC11/BTG2/HSPA2/TBX3/BRCA1/PHOX2B/CDKN1A/CRLF3/KCNA5/XRCC3/SPHK1/BCL2L11/PKP4/C6orf89/CKS1B/PSRC1/FOXE3/TFAP4/CCDC57/PPP2R5B/STRA8/FGF10/PTK6/DDX3X/AURKB/SLC6A4 | 62 |
| BP | GO:1903131 | mononuclear cell differentiation | 64/1945 | 411/18862 | 0.000526426 | 0.040237815 | 0.035087937 | BCL3/IL6/CLCF1/ZC3H12A/MSH2/IL4R/SOCS1/BCL6/MYC/EGR1/NHEJ1/TMEM98/SRF/MR1/EGR3/RABL3/CD3G/CD2/NFKBIZ/LTBR/FOXP1/ITGB8/IL10/TGFBR2/LY9/CDK6/THOC5/TREM2/KLF6/ONECUT1/LCK/CCR2/CD19/NFATC2/CTLA4/MAFB/UBD/IL1B/DCLRE1C/BATF3/SLAMF6/LEPR/GLI3/PIR/JAK3/CD3E/ZMIZ1/MFNG/IL15/CD40LG/TYRO3/VEGFA/ZC3H8/ZFP36L2/JUN/FNIP1/RSAD2/DTX1/NCKAP1L/RAG2/IL11/HDAC9/IKZF3/IFNA8 | 64 |
| BP | GO:1901991 | negative regulation of mitotic cell cycle phase transition | 43/1945 | 250/18862 | 0.000550131 | 0.041517451 | 0.036203798 | NDC80/CCL2/FAM107A/CDK5RAP2/KLF4/PSMD10/SFN/PCNA/ZWINT/MAD2L1/USP47/DONSON/AURKA/PSME2/GPNMB/CDK6/VPS4A/GFI1B/CNOT8/PSMD14/RBX1/CHEK1/PSMD1/DACT1/PSMG2/PSMB9/FHL1/CDKN1B/KLHL22/BTG2/BRCA1/BUB1/CDKN1A/XRCC3/PSMD7/TRIP13/ZFP36L2/RBL1/PSMB7/PSMB10/AURKB/PSMD4/NAE1 | 43 |
| BP | GO:0071902 | positive regulation of protein serine/threonine kinase activity | 51/1945 | 311/18862 | 0.00057026 | 0.042302443 | 0.036888322 | EDN1/TNIK/MDFIC/FGFR1/LPAR1/ERN1/PSMD10/GADD45B/CSK/CD24/EDN3/SPRY2/WNT5A/ADRB2/TGFB3/DUSP6/ATP2B4/DUSP5/SLC8A2/CALM3/NTRK3/THBS1/PROK2/MAPKAPK2/PLA2G1B/GADD45G/ARHGEF5/PROX1/IL1B/HTR2B/IGFBP6/FRS2/ERP29/IRAK2/RET/CD40LG/PBK/MAP2K5/SASH1/VEGFA/MAP3K7/CKS1B/FGD2/PSRC1/FGF10/DDX3X/DUSP9/DKK1/C5AR1/S100A12/PROK1 | 51 |
| BP | GO:0000086 | G2/M transition of mitotic cell cycle | 44/1945 | 258/18862 | 0.000574723 | 0.042302443 | 0.036888322 | CETN2/PHLDA1/CDK5RAP2/PSMD10/NINL/DTL/ENSA/HMMR/TUBG1/RAD51C/USP47/DONSON/AURKA/PSME2/CALM3/OPTN/VPS4A/CEP290/CSNK1E/PSMD14/SKP2/RBX1/PLCB1/CHEK1/CEP78/PSMD1/PSMB9/FHL1/CEP250/CEP63/HSPA2/BRCA1/PHOX2B/CDKN1A/PSMD7/CEP152/CEP70/NEDD1/PSMB7/CCDC57/PSMB10/AURKB/PSMD4/NAE1 | 44 |
| BP | GO:0048608 | reproductive structure development | 63/1945 | 405/18862 | 0.000595629 | 0.043306608 | 0.037763968 | EPAS1/MSH2/FOSL1/JUNB/SOCS3/PTX3/ING2/ARID5B/FOXC1/INHBB/SPP1/NUPR1/ADAMTS1/WNT5A/LIF/STC1/ITGB8/ARID4A/IL10/GAS2/ADCYAP1/WT1/MGST1/IMMP2L/ZNF568/SPINT2/TP63/CYP19A1/IDH1/ADM/BMP5/WDR48/SPO11/ICAM1/HMGCS1/KDM5B/OSR1/RBM15/TNFSF10/TBX3/GJA1/GLI3/FRS2/CCNF/CYP27B1/PRDX3/TLR3/HOXD13/TYRO3/VEGFA/BCL2L11/NSDHL/HESX1/TMED2/SPATA2/CSDE1/ESR1/SERPINB5/FGF10/LHX9/CEBPA/FGF9/BIK | 63 |
| BP | GO:0062012 | regulation of small molecule metabolic process | 67/1945 | 437/18862 | 0.00060801 | 0.043404832 | 0.037849621 | CYP7A1/GPAM/PFKFB3/PTGS2/MIDN/GCK/EGR1/CEACAM1/PSMD10/NUPR1/PPP1R3C/SQLE/PPARGC1A/SIRT4/PDP2/SIK1/PRKAA2/PRKAB2/PSME2/NUP153/ATP2B4/GPD1/SORBS1/TREM2/FDFT1/PGAM1/NR4A3/PSMD14/ADM/BMP5/PSMD1/PSMB9/CES1/PMVK/OAZ2/PROX1/PANK2/ELOVL6/NOS3/IL1B/HMGCS1/NUP37/ACADL/NCOR1/LEPR/BRCA1/NUP43/GUCA2B/COX11/PPP1R3B/CYP27B1/MVK/FABP5/PSMD7/IDI1/GCKR/HPCA/IRS2/PSMB7/CLCN2/PSMB10/PARK7/NFYB/PRKAG1/CLYBL/PSMD4/ABCD2 | 67 |
| BP | GO:0042116 | macrophage activation | 22/1945 | 102/18862 | 0.000611541 | 0.043404832 | 0.037849621 | IL6/ZC3H12A/IL4R/WNT5A/CRTC3/FOXP1/IL10/SBNO2/SLC11A1/TLR7/THBS1/LDLR/TREM2/CD93/IL1RL1/TLR8/TLR3/SPHK1/TLR1/TICAM1/CEBPA/C5AR1 | 22 |
| BP | GO:0045069 | regulation of viral genome replication | 19/1945 | 83/18862 | 0.000651849 | 0.045721484 | 0.039869773 | OAS1/FAM111A/TOP2A/RNASEL/APOBEC3A/IFITM2/ISG15/PROX1/OASL/OAS2/CCL5/APOBEC3C/BST2/PPIE/IFIT1/RSAD2/DDX3X/OAS3/EIF2AK2 | 19 |
| BP | GO:2000116 | regulation of cysteine-type endopeptidase activity | 40/1945 | 230/18862 | 0.000673583 | 0.046341919 | 0.040410802 | VIL1/MYC/GRAMD4/KLF4/TRADD/ARL6IP5/SFN/NOL3/CASP1/CARD16/CASP8AP2/IFI6/USP47/SERPINB9/SMAD3/TNFRSF10B/SOX7/THBS1/P2RX1/PLAUR/TP63/LCK/RFFL/APAF1/PSMB9/FAS/TNFSF10/COL4A3/CSN2/PRDX3/MAP2K5/VEGFA/BCL2L11/FNIP1/FAM162A/TFAP4/NLRP12/DDX3X/PARK7/LAMP3 | 40 |
| BP | GO:0036293 | response to decreased oxygen levels | 57/1945 | 360/18862 | 0.000685965 | 0.046341919 | 0.040410802 | EPAS1/EDN1/MYC/PTGS2/EGR1/NR4A2/PSMD10/SRF/RWDD3/CD24/NOL3/APOLD1/CASP1/CARD16/ITPR1/STC1/PPARGC1A/SIRT4/VEGFC/TGFB3/TGFBR2/SMAD3/PSME2/THBS1/USF1/TBL2/PSMD14/HIF3A/ADM/RBX1/PSMD1/CPEB4/APAF1/PSMB9/TGFBR3/ICAM1/ALAD/SCFD1/PLOD2/LDHA/HIPK2/NPEPPS/KCNA5/CLCA1/PSMD7/VEGFA/ANGPTL4/NFE2L2/FAM162A/PSMB7/VHL/TRH/PSMB10/ANGPT4/FUNDC1/SLC6A4/PSMD4 | 57 |
| BP | GO:0070498 | interleukin-1-mediated signaling pathway | 22/1945 | 103/18862 | 0.000703235 | 0.046341919 | 0.040410802 | IL6/EGR1/PSMD10/IKBKB/PELI1/MAP3K8/PSME2/PSMD14/IL1RN/RBX1/PLCB1/PSMD1/PELI2/PSMB9/IL1B/IRAK2/PSMD7/MAP3K7/PSMB7/PSMB10/RPS6KA5/PSMD4 | 22 |
| BP | GO:1901988 | negative regulation of cell cycle phase transition | 45/1945 | 268/18862 | 0.00070394 | 0.046341919 | 0.040410802 | NDC80/CCL2/FAM107A/CDK5RAP2/KLF4/PSMD10/SFN/PCNA/ZWINT/DTL/MAD2L1/USP47/DONSON/AURKA/PSME2/GPNMB/CDK6/VPS4A/GFI1B/CNOT8/PSMD14/RBX1/CHEK1/PSMD1/DACT1/PSMG2/PSMB9/FHL1/CDKN1B/KLHL22/BTG2/BRCA1/BUB1/CDKN1A/XRCC3/PSMD7/TRIP13/C10orf99/ZFP36L2/RBL1/PSMB7/PSMB10/AURKB/PSMD4/NAE1 | 45 |
| BP | GO:0031331 | positive regulation of cellular catabolic process | 60/1945 | 384/18862 | 0.000708504 | 0.046341919 | 0.040410802 | IL6/ZC3H12A/PFKFB3/FOXO1/TRIM5/ZFP36/PSMD10/NUPR1/TRIM22/RNF185/ADRB2/TRIB1/PRKAA2/SH3BP4/AURKA/GPD1/AXIN1/LDLR/TREM2/OPTN/CSNK1E/PCSK9/SNX33/CNOT8/POLR2G/RNF14/RBX1/VPS11/C9orf72/TP53INP2/DACT1/PIP4K2B/NKD2/KHSRP/MAPK9/IL1B/BTG2/TNFRSF1B/FOXO3/NANOS2/KEAP1/FBXO22/PLEKHF1/MAP3K7/ZFP36L2/BCL2L11/CCDC22/NFE2L2/FBXL5/IRS2/RNF152/TICAM1/RNF128/TRIM68/CEBPA/ROCK1/SCOC/PARK7/RNF144B/ABCD2 | 60 |
| BP | GO:0106106 | cold-induced thermogenesis | 28/1945 | 144/18862 | 0.000716376 | 0.046341919 | 0.040410802 | EPAS1/IL4R/FABP4/PER2/PPARGC1A/ADRB2/FOXC2/NPR3/PRKAB2/ADCYAP1/LAMA4/ACVR2B/CCR2/GADD45G/GATM/ELOVL6/ACADL/GJA1/LEPR/PHOX2B/IL15/FABP5/VEGFA/ADRB1/TRPM8/HADH/KDM6B/OXT | 28 |
| BP | GO:0120161 | regulation of cold-induced thermogenesis | 28/1945 | 144/18862 | 0.000716376 | 0.046341919 | 0.040410802 | EPAS1/IL4R/FABP4/PER2/PPARGC1A/ADRB2/FOXC2/NPR3/PRKAB2/ADCYAP1/LAMA4/ACVR2B/CCR2/GADD45G/GATM/ELOVL6/ACADL/GJA1/LEPR/PHOX2B/IL15/FABP5/VEGFA/ADRB1/TRPM8/HADH/KDM6B/OXT | 28 |
| BP | GO:0061458 | reproductive system development | 63/1945 | 408/18862 | 0.00072333 | 0.046341919 | 0.040410802 | EPAS1/MSH2/FOSL1/JUNB/SOCS3/PTX3/ING2/ARID5B/FOXC1/INHBB/SPP1/NUPR1/ADAMTS1/WNT5A/LIF/STC1/ITGB8/ARID4A/IL10/GAS2/ADCYAP1/WT1/MGST1/IMMP2L/ZNF568/SPINT2/TP63/CYP19A1/IDH1/ADM/BMP5/WDR48/SPO11/ICAM1/HMGCS1/KDM5B/OSR1/RBM15/TNFSF10/TBX3/GJA1/GLI3/FRS2/CCNF/CYP27B1/PRDX3/TLR3/HOXD13/TYRO3/VEGFA/BCL2L11/NSDHL/HESX1/TMED2/SPATA2/CSDE1/ESR1/SERPINB5/FGF10/LHX9/CEBPA/FGF9/BIK | 63 |
| BP | GO:0007585 | respiratory gaseous exchange by respiratory system | 16/1945 | 65/18862 | 0.000735557 | 0.046341919 | 0.040410802 | EDN1/NR4A2/ADH5/COX15/STK40/ELN/CSF2RB/MAFB/PHOX2B/MAN1A2/CYSLTR1/ECEL1/NDST1/GLS/BPGM/GLRA1 | 16 |
| BP | GO:0033630 | positive regulation of cell adhesion mediated by integrin | 8/1945 | 21/18862 | 0.00074695 | 0.046341919 | 0.040410802 | LIF/FOXC2/PODXL/CD3E/CCL5/RET/CXCL13/NCKAP1L | 8 |
| BP | GO:0071219 | cellular response to molecule of bacterial origin | 37/1945 | 209/18862 | 0.000747541 | 0.046341919 | 0.040410802 | IL6/ZC3H12A/CXCL9/CCL2/TRIM5/ZFP36/CXCL10/CASP1/CARD16/WNT5A/PPARGC1A/IL10/CHMP5/SBNO2/TRIB1/CXCL1/CX3CR1/CSF3/AKAP8/TREM2/LY86/CXCL11/SERPINE1/ICAM1/IL1B/SIRPA/TNFRSF1B/CTSG/IRAK2/CCL5/SASH1/TNIP3/CXCL2/CXCL13/TLR1/TICAM1/TBXA2R | 37 |
| BP | GO:0071347 | cellular response to interleukin-1 | 33/1945 | 180/18862 | 0.00075647 | 0.046341919 | 0.040410802 | IL6/EDN1/ZC3H12A/CCL2/EGR1/PSMD10/IKBKB/PELI1/HAS2/AKAP12/MAP3K8/PSME2/CCL7/PSMD14/IL1RN/RBX1/PLCB1/CCL18/PSMD1/PELI2/PSMB9/KLF2/ICAM1/IL1B/SIRPA/IRAK2/CCL5/PSMD7/MAP3K7/PSMB7/PSMB10/RPS6KA5/PSMD4 | 33 |
| BP | GO:0002718 | regulation of cytokine production involved in immune response | 19/1945 | 84/18862 | 0.0007623 | 0.046341919 | 0.040410802 | IL6/BCL6/WNT5A/IL10/TGFB3/CD160/NR4A3/CCR2/DDX58/FFAR3/IL1B/TNFRSF1B/JAK3/TLR3/BST2/MAP3K7/RSAD2/TICAM1/HLA-A | 19 |
| BP | GO:0070306 | lens fiber cell differentiation | 10/1945 | 31/18862 | 0.000769515 | 0.046341919 | 0.040410802 | EPHA2/SPRY2/SMAD3/MAF/TMOD1/PROX1/KDM5B/FRS2/SPRY1/FOXE3 | 10 |
| BP | GO:0031669 | cellular response to nutrient levels | 37/1945 | 210/18862 | 0.0008192 | 0.048840722 | 0.042589793 | ZC3H12A/FOXO1/FAM107A/SRF/INHBB/UPP1/VPS41/WIPI1/NUAK2/SIK1/LPL/ZFYVE1/PRKAA2/ATF3/USF1/PCSK9/TBL2/PIM1/DAPL1/CPEB4/RRAGB/ICAM1/IMPACT/FAS/FOXO3/CYP27B1/CDKN1A/IL15/JUN/FNIP1/NFE2L2/MAP1LC3B/RNF152/MIOS/LAMP2/PRKAG1/EIF2AK2 | 37 |
| BP | GO:0009896 | positive regulation of catabolic process | 68/1945 | 450/18862 | 0.000827425 | 0.048842675 | 0.042591496 | IL6/ZC3H12A/PFKFB3/FOXO1/TRIM5/ZFP36/PSMD10/NUPR1/WNT5A/TRIM22/DTL/RNF185/ADRB2/TRIB1/PRKAA2/SH3BP4/AURKA/SOX17/GPD1/AXIN1/LDLR/TREM2/TRIM32/OPTN/CSNK1E/PCSK9/SNX33/CNOT8/POLR2G/RNF14/RBX1/VPS11/C9orf72/TP53INP2/DACT1/PIP4K2B/NKD2/KHSRP/OAZ2/CDKN1B/MAPK9/IL1B/BTG2/GJA1/TNFRSF1B/FOXO3/NANOS2/KEAP1/FBXO22/PLEKHF1/MAP3K7/ZFP36L2/BCL2L11/CCDC22/NFE2L2/FBXL5/IRS2/RNF152/TICAM1/NSF/RNF128/TRIM68/CEBPA/ROCK1/SCOC/PARK7/RNF144B/ABCD2 | 68 |
| BP | GO:0048660 | regulation of smooth muscle cell proliferation | 30/1945 | 160/18862 | 0.000881998 | 0.050907608 | 0.044392146 | IL6/EDN1/TCF7L2/ERN1/KLF4/ADAMTS1/PPARGC1A/HBEGF/FOXP1/NPR3/IL10/TGFB3/TRIB1/TGFBR2/ABCC4/ELN/THBS1/NR4A3/CDKN1B/CNN1/GJA1/CCL5/CDKN1A/IL15/BMPR1A/JUN/HPGD/CDH13/FGF9/APOD | 30 |
| BP | GO:0051784 | negative regulation of nuclear division | 14/1945 | 54/18862 | 0.000894709 | 0.050907608 | 0.044392146 | NDC80/CDK5RAP2/ZWINT/LIF/MAD2L1/CHEK1/PSMG2/KLHL22/NANOS2/BUB1/TOM1L1/XRCC3/TRIP13/AURKB | 14 |
| BP | GO:0070228 | regulation of lymphocyte apoptotic process | 14/1945 | 54/18862 | 0.000894709 | 0.050907608 | 0.044392146 | GPAM/BCL6/WNT5A/CD3G/FOXP1/IL10/ARG2/GIMAP8/JAK3/CCL5/ZC3H8/FNIP1/IRS2/AURKB | 14 |
| BP | GO:0032722 | positive regulation of chemokine production | 15/1945 | 60/18862 | 0.000896561 | 0.050907608 | 0.044392146 | IL6/IL4R/EGR1/WNT5A/LPL/ADCYAP1/TLR7/TRIM32/IL1RL1/FFAR3/IL1B/TLR3/TICAM1/DDX3X/EIF2AK2 | 15 |
| BP | GO:0048339 | paraxial mesoderm development | 7/1945 | 17/18862 | 0.000937096 | 0.051731144 | 0.045110281 | FOXC1/WNT5A/FOXC2/TEAD2/SMAD3/BMPR1A/EXOC4 | 7 |
| BP | GO:1901550 | regulation of endothelial cell development | 7/1945 | 17/18862 | 0.000937096 | 0.051731144 | 0.045110281 | IKBKB/TNFRSF1A/PLCB1/IL1B/VCL/VEGFA/ROCK1 | 7 |
| BP | GO:1903140 | regulation of establishment of endothelial barrier | 7/1945 | 17/18862 | 0.000937096 | 0.051731144 | 0.045110281 | IKBKB/TNFRSF1A/PLCB1/IL1B/VCL/VEGFA/ROCK1 | 7 |
| BP | GO:0071222 | cellular response to lipopolysaccharide | 35/1945 | 197/18862 | 0.000958282 | 0.052415375 | 0.04570694 | IL6/ZC3H12A/CXCL9/CCL2/TRIM5/ZFP36/CXCL10/CASP1/CARD16/WNT5A/PPARGC1A/IL10/CHMP5/SBNO2/TRIB1/CXCL1/CX3CR1/CSF3/AKAP8/LY86/CXCL11/SERPINE1/ICAM1/IL1B/SIRPA/TNFRSF1B/CTSG/IRAK2/CCL5/SASH1/TNIP3/CXCL2/CXCL13/TICAM1/TBXA2R | 35 |
| BP | GO:0003012 | muscle system process | 68/1945 | 453/18862 | 0.000989258 | 0.053617793 | 0.046755465 | EDN1/ZC3H12A/ACE2/FOXO1/CALCA/KLF4/SRF/MYBPH/EDN3/SULF2/NOL3/ACTG2/STC1/PPARGC1A/TNFRSF1A/HOMER1/SCNN1B/ADRB2/GLRX3/SMAD3/ATP2B4/PARP2/SORBS1/ARG2/CALM3/PROK2/P2RX1/PDE4D/NR4A3/PDE9A/RGS2/MYL9/TMOD1/CHRNB1/MYOM1/GSTO1/MTMR4/GJC1/GATM/NOS1AP/MYL6B/NOS3/IL1B/HTR2B/TBX3/CACNB2/CNN1/GJA1/TNFRSF1B/NEB/FOXO3/ANK2/VCL/BBS2/SCN7A/IL15/KCNA5/SPHK1/PI16/DTNA/OXT/HCN4/ROCK1/HSBP1/KCNB2/CACNA1G/GLRA1/TBXA2R | 68 |
| BP | GO:0009954 | proximal/distal pattern formation | 10/1945 | 32/18862 | 0.001016929 | 0.054479349 | 0.047506755 | CHSY1/LRP4/TP63/IRX3/HOXC9/OSR1/HOXD10/GLI3/FGF10/IRX2 | 10 |
| BP | GO:0050727 | regulation of inflammatory response | 57/1945 | 366/18862 | 0.00102752 | 0.054479349 | 0.047506755 | IL6/BCL6/ACE2/C2CD4B/PTGS2/FABP4/SOCS3/KLF4/TRADD/CASP1/NUPR1/WNT5A/TAC1/NFKBIZ/FOXP1/TNFRSF1A/IL20/LPL/IL10/SBNO2/SMAD3/OSM/FEM1A/ADCYAP1/TNFAIP6/C2CD4A/PLA2G7/TLR7/LDLR/TREM2/CCR2/IL1RL1/CREB3L3/FFAR3/NAPEPLD/SERPINE1/IL1B/SIRPA/TNFRSF1B/AOAH/USP18/CCL5/TLR3/MVK/IL15/PBK/TYRO3/SPHK1/AKNA/SPATA2/ESR1/DNASE1/NLRP12/CLOCK/CEBPA/PARK7/S100A12 | 57 |
| BP | GO:0031668 | cellular response to extracellular stimulus | 40/1945 | 235/18862 | 0.001034916 | 0.054479349 | 0.047506755 | ZC3H12A/FOSL1/FOXO1/FAM107A/NR4A2/SRF/INHBB/UPP1/VPS41/WIPI1/NUAK2/SIK1/FOS/LPL/ZFYVE1/PRKAA2/ATF3/USF1/PCSK9/TBL2/PIM1/DAPL1/CPEB4/RRAGB/ICAM1/IMPACT/FAS/FOXO3/CYP27B1/CDKN1A/IL15/JUN/FNIP1/NFE2L2/MAP1LC3B/RNF152/MIOS/LAMP2/PRKAG1/EIF2AK2 | 40 |
| BP | GO:0140014 | mitotic nuclear division | 48/1945 | 296/18862 | 0.001041705 | 0.054479349 | 0.047506755 | EDN1/UBXN2B/DSN1/NDC80/NUSAP1/RACGAP1/CDK5RAP2/ANLN/SPAST/EDN3/KLHDC8B/ZWINT/REEP4/ANAPC7/TUBG1/NCAPG2/GOLGA2/CHMP5/MAD2L1/AURKA/RRS1/AKAP8/CHMP4A/VPS4A/CDC23/SMC2/PTTG1/CHEK1/NPM2/CLASP2/PSMG2/KLHL22/IL1B/ANAPC11/TUBG2/NCAPD2/RCC1/BUB1/NUF2/TOM1L1/XRCC3/SPHK1/TRIP13/CENPK/SMC4/PSRC1/AURKB/KIF22 | 48 |
| BP | GO:0072132 | mesenchyme morphogenesis | 13/1945 | 49/18862 | 0.001071019 | 0.05485635 | 0.047835504 | MYC/FOXC1/WNT5A/ACTG2/FOXC2/TGFBR2/SMAD3/MSX1/BMP5/NOS3/OSR1/BMPR1A/EXOC4 | 13 |
| BP | GO:0014745 | negative regulation of muscle adaptation | 6/1945 | 13/18862 | 0.001078402 | 0.05485635 | 0.047835504 | FOXO1/KLF4/NOL3/SMAD3/ATP2B4/NOS3 | 6 |
| BP | GO:0009914 | hormone transport | 50/1945 | 312/18862 | 0.001082456 | 0.05485635 | 0.047835504 | IL6/EDN1/MIDN/GCK/ARL2BP/PER2/PIM3/TCF7L2/EDN3/INHBB/SPP1/TAC1/LIF/ITPR1/ENSA/SIRT4/CRYM/OSM/ADCYAP1/PHPT1/SLC22A9/KALRN/SLCO1C1/IL1RN/CYP19A1/CPLX1/ADM/GPR27/CPLX3/VSNL1/FFAR3/IL1B/KDM5B/RAC1/TBX3/GJA1/CCKAR/ENHO/CCL5/KCNA5/IRS2/CLOCK/HADH/IL11/TRH/CYB5R4/LTBP4/CAMK2N1/PARK7/HMGN3 | 50 |
| BP | GO:0048659 | smooth muscle cell proliferation | 30/1945 | 162/18862 | 0.001085718 | 0.05485635 | 0.047835504 | IL6/EDN1/TCF7L2/ERN1/KLF4/ADAMTS1/PPARGC1A/HBEGF/FOXP1/NPR3/IL10/TGFB3/TRIB1/TGFBR2/ABCC4/ELN/THBS1/NR4A3/CDKN1B/CNN1/GJA1/CCL5/CDKN1A/IL15/BMPR1A/JUN/HPGD/CDH13/FGF9/APOD | 30 |
| BP | GO:0034612 | response to tumor necrosis factor | 51/1945 | 320/18862 | 0.001100099 | 0.055115903 | 0.048061839 | EDN1/ZC3H12A/CCL2/FABP4/CALCA/ZFP36/PSMD10/TRADD/IKBKB/NOL3/CASP1/CARD16/LTBR/PPARGC1A/HAS2/TNFRSF1A/AKAP12/MAP3K14/PSME2/GPD1/THBS1/CCL7/TRIM32/PSMD14/CCL18/PSMD1/RFFL/PSMB9/EDAR/KLF2/UBD/ICAM1/FAS/BAG4/TNFRSF1B/FOXO3/BRCA1/CCL5/CD40LG/PSMD7/SPHK1/TNFRSF8/ZFP36L2/EDARADD/SPATA2/NFE2L2/PSMB7/PSMB10/CEBPA/TRAF3/PSMD4 | 51 |
| BP | GO:0032147 | activation of protein kinase activity | 52/1945 | 328/18862 | 0.001115987 | 0.055185929 | 0.048122902 | TNIK/MDFIC/SOCS1/CALCA/LPAR1/ERN1/GADD45B/WNT5A/GPRC5A/ADRB2/MAP3K14/TGFB3/MAP3K8/DUSP6/TGFBR2/SLC11A1/ITGB1BP1/RAPGEF1/DUSP5/TNFRSF10B/AXIN1/NTRK3/THBS1/PROK2/MAPKAPK2/PLA2G1B/GADD45G/IL1B/IGFBP6/FRS2/ERP29/IRAK2/CCL5/TLR3/PRRC1/RET/CD40LG/TOM1L1/PBK/MAP2K5/VEGFA/MAP3K7/ADCY6/PRKACB/NCKAP1L/FGF10/ANGPT4/PARK7/DUSP9/C5AR1/EIF2AK2/PROK1 | 52 |
| BP | GO:0030968 | endoplasmic reticulum unfolded protein response | 25/1945 | 127/18862 | 0.00112001 | 0.055185929 | 0.048122902 | PPP1R15A/CCL2/FKBP14/ERN1/WIPI1/COPS5/RNF121/KDELR3/ATF3/IGFBP1/ATP6V0D1/RHBDD2/TBL2/CREB3L3/GOSR2/DERL3/DERL2/RNF175/CREB3L4/BCL2L11/TMED2/NFE2L2/PPP2R5B/EXTL2/YOD1 | 25 |
| BP | GO:0071346 | cellular response to interferon-gamma | 32/1945 | 177/18862 | 0.001148258 | 0.056020346 | 0.048850525 | EDN1/OAS1/SOCS1/CCL2/TRIM5/SOCS3/RAB43/CASP1/WNT5A/TRIM22/AQP4/GBP5/GBP7/SLC26A6/CDC42EP2/CCL7/RPL13A/STX8/CCL18/ICAM1/OASL/OAS2/SIRPA/VAMP3/CCL5/MT2A/TLR3/PARP14/HLA-A/TRIM68/OAS3/WAS | 32 |
| BP | GO:0007249 | I-kappaB kinase/NF-kappaB signaling | 46/1945 | 282/18862 | 0.001155737 | 0.056020346 | 0.048850525 | BCL3/ZC3H12A/TRIM5/LPAR1/TRADD/IKBKB/CASP1/CARD16/WNT5A/TRIM22/PELI1/LTBR/TRAF3IP2/TNFRSF1A/MAP3K14/CX3CR1/TNFRSF10B/TLR7/TRIM32/APOL3/OPTN/PELI2/TLR8/EDAR/TFG/UBD/IL1B/HTR2B/TNFSF10/SIRPA/GJA1/IRAK2/TLR3/BST2/MAP3K7/TMEM9B/TNIP3/CCDC22/TMEM101/ESR1/NLRP12/TICAM1/TRIM68/ROCK1/TRAF3/S100A12 | 46 |
| BP | GO:0045930 | negative regulation of mitotic cell cycle | 51/1945 | 321/18862 | 0.001179943 | 0.056732423 | 0.049471466 | MSH2/NDC80/BCL6/CCL2/FAM107A/CDK5RAP2/KLF4/PSMD10/SFN/PCNA/ZWINT/FOXC1/PPP1R10/IL10/MAD2L1/USP47/DONSON/SMAD3/ZWILCH/AURKA/PSME2/GPNMB/CDK6/VPS4A/GFI1B/CNOT8/PSMD14/RBX1/CHEK1/PSMD1/DACT1/PSMG2/PSMB9/FHL1/CDKN1B/KLHL22/BTG2/BRCA1/BUB1/CDKN1A/TOM1L1/XRCC3/PSMD7/TRIP13/ZFP36L2/RBL1/PSMB7/PSMB10/AURKB/PSMD4/NAE1 | 51 |
