# Supplementary material for: Identification of Fatty acid metabolism-Related Genes in the Progression from Non-Alcoholic Fatty Liver to Nonalcoholic fatty liver disease
Source: Research Square preprint supplement (doi:10.21203/rs.3.rs-5030401/v1), 2024-10-21
Supplement: Supplementary file 11 [file c1e4a85715ef686bbb50c736.docx]

**Table S9. Results of GSE49541 typing.**

| Samples | Cluster |
| --- | --- |
| GSM789110 | A |
| GSM789120 | A |
| GSM789122 | A |
| GSM789123 | A |
| GSM789125 | A |
| GSM789128 | A |
| GSM789129 | A |
| GSM789131 | A |
| GSM789132 | A |
| GSM789133 | A |
| GSM789140 | A |
| GSM789143 | A |
| GSM789144 | A |
| GSM789145 | A |
| GSM789148 | A |
| GSM789152 | A |
| GSM789153 | A |
| GSM789158 | A |
| GSM789159 | A |
| GSM789163 | A |
| GSM789164 | A |
| GSM789167 | A |
| GSM789168 | A |
| GSM789169 | A |
| GSM789170 | A |
| GSM789171 | A |
| GSM789173 | A |
| GSM789174 | A |
| GSM789175 | A |
| GSM789176 | A |
| GSM789177 | A |
| GSM789180 | A |
| GSM789181 | A |
| GSM789111 | B |
| GSM789112 | B |
| GSM789113 | B |
| GSM789114 | B |
| GSM789115 | B |
| GSM789116 | B |
| GSM789117 | B |
| GSM789118 | B |
| GSM789119 | B |
| GSM789121 | B |
| GSM789124 | B |
| GSM789126 | B |
| GSM789127 | B |
| GSM789130 | B |
| GSM789134 | B |
| GSM789135 | B |
| GSM789136 | B |
| GSM789137 | B |
| GSM789138 | B |
| GSM789139 | B |
| GSM789141 | B |
| GSM789142 | B |
| GSM789146 | B |
| GSM789147 | B |
| GSM789149 | B |
| GSM789150 | B |
| GSM789151 | B |
| GSM789154 | B |
| GSM789155 | B |
| GSM789156 | B |
| GSM789157 | B |
| GSM789160 | B |
| GSM789161 | B |
| GSM789162 | B |
| GSM789165 | B |
| GSM789166 | B |
| GSM789172 | B |
| GSM789178 | B |
| GSM789179 | B |
