# Supplementary material for: Identification of Fatty acid metabolism-Related Genes in the Progression from Non-Alcoholic Fatty Liver to Nonalcoholic fatty liver disease
Source: Research Square preprint supplement (doi:10.21203/rs.3.rs-5030401/v1), 2024-10-21
Supplement: Supplementary file 12 [file d7b5bebd5217ba233546f69c.docx]

| Samples | B cells naive | B cells memory | Plasma cells | T cells CD8 | T cells CD4 naive | T cells CD4 memory resting | T cells CD4 memory activated | T cells follicular helper | T cells regulatory (Tregs) | T cells gamma delta | NK cells resting | NK cells activated | Monocytes | Macrophages M0 | Macrophages M1 | Macrophages M2 | Dendritic cells resting | Dendritic cells activated | Mast cells resting | Mast cells activated | Eosinophils | Neutrophils |
| --- | --- | --- | --- | --- | --- | --- | --- | --- | --- | --- | --- | --- | --- | --- | --- | --- | --- | --- | --- | --- | --- | --- |
| GSM2863101_con | 0.052431492 | 0 | 0.051304401 | 0.064027696 | 0 | 0.18365472 | 0.102089356 | 0 | 0 | 0.071952047 | 0 | 0.007097589 | 0.186635039 | 0 | 0.019941222 | 0.133621798 | 0.006057419 | 0.013330872 | 0.005601736 | 0 | 0 | 0.102254611 |
| GSM1627740_con | 0.012706426 | 0 | 0.054285072 | 0 | 0 | 0.192795887 | 0.001560699 | 0 | 0.050166086 | 0.109513353 | 0.06043257 | 0 | 0.032146718 | 0 | 0.07309514 | 0.258755262 | 0.013974855 | 0 | 0.0882902 | 0 | 0 | 0.052277732 |
| GSM1627741_con | 0.046423767 | 0 | 0.050713415 | 0.063679886 | 0.030944375 | 0.078694055 | 0.037634593 | 0 | 0.003441317 | 0.109240542 | 0 | 0.062933416 | 0.169063276 | 0 | 0.021384298 | 0.186494127 | 0 | 0.037917097 | 0.065439068 | 0 | 0 | 0.035996768 |
| GSM1627742_con | 0.008936812 | 0 | 0.061275707 | 0.123027455 | 0 | 0.25410494 | 0 | 0 | 0 | 0.023773957 | 0 | 0.040498218 | 0.093976951 | 0 | 0.020405424 | 0.277505542 | 0 | 0 | 0.052572542 | 0 | 0 | 0.043922453 |
| GSM1627743_con | 0.072182975 | 0 | 0.07424455 | 0.027849278 | 0 | 0.204674302 | 0 | 0.003030408 | 0 | 0.036759972 | 0 | 0.090312112 | 0.034679818 | 0 | 0.032062261 | 0.22981007 | 0.00767446 | 0.014472225 | 0.103458102 | 0 | 0 | 0.068789467 |
| GSM1627744_con | 0.059017655 | 0 | 0.136597697 | 0.025468265 | 0 | 0.24003571 | 0 | 0 | 0 | 0.027989797 | 0.011057564 | 0.011830008 | 0 | 0 | 0.043251571 | 0.249867687 | 0.003117724 | 0 | 0.097700554 | 0 | 0 | 0.094065768 |
| GSM1627746_con | 0.036198622 | 0 | 0.121857133 | 0 | 0 | 0.173214777 | 0.084177637 | 0 | 0 | 0.136505479 | 0 | 0.048232813 | 0.001303101 | 0 | 0.017304593 | 0.201726526 | 0.003567746 | 0 | 0.10419884 | 0 | 0 | 0.071712735 |
| GSM1627747_con | 0.020316173 | 0 | 0.119523846 | 0 | 0 | 0.392288739 | 0 | 0 | 0 | 0.190269662 | 0 | 0 | 0.001083135 | 0 | 0.03877103 | 0.158685128 | 0 | 0.018314274 | 0.000824309 | 0.003618144 | 0 | 0.056305561 |
| GSM1627749_con | 0.069049253 | 0 | 0.088486872 | 0 | 0 | 0.274364238 | 0.049172169 | 0 | 0 | 0.154127199 | 0 | 0.012180694 | 0.049782046 | 0 | 0.026711146 | 0.106036281 | 0.007456201 | 0 | 0.063080819 | 0 | 0 | 0.099553081 |
| GSM1627750_con | 0.061911321 | 0 | 0.046619449 | 0 | 0 | 0.243721865 | 0.063400898 | 0 | 0 | 0.202208419 | 0 | 0.020709541 | 0.002318607 | 0 | 0.050600469 | 0.102318394 | 0.063525792 | 0 | 0.073452316 | 0 | 0.031608822 | 0.037604106 |
| GSM1627751_con | 0.011142253 | 0 | 0.141760524 | 0 | 0 | 0.231602906 | 0.035111837 | 0 | 0 | 0.155979234 | 0 | 0.023188079 | 0.039866893 | 0 | 0.013872733 | 0.262940972 | 0.003046498 | 0.01661783 | 0.042749273 | 0 | 0 | 0.022120968 |
| GSM1627752_con | 0.175551916 | 0 | 0.072829934 | 0.048717886 | 0 | 0.11362644 | 0.023938605 | 0 | 0 | 0.147119725 | 0 | 0.03678328 | 0.055129079 | 0 | 0.059486806 | 0.15528802 | 0.01563643 | 0.005752242 | 0.086886162 | 0 | 0.000783153 | 0.002470323 |
| GSM1627758_con | 0.018477604 | 0 | 0.077081244 | 0 | 0 | 0.286034407 | 0 | 0 | 0 | 0.185199309 | 0 | 0.022816167 | 0 | 0 | 0.020846003 | 0.202102416 | 0 | 0.00489352 | 0.085204302 | 0 | 0.013177137 | 0.084167891 |
| GSM1627759_con | 0.073886101 | 0 | 0.06702069 | 0 | 0 | 0.264296058 | 0.001031876 | 0 | 0.044279794 | 0.093179521 | 0 | 0.028754209 | 0.058869277 | 0 | 0.040748518 | 0.131100842 | 0.10922085 | 0 | 0.060974617 | 0.026637647 | 0 | 0 |
| GSM1627761_con | 0.061123177 | 0 | 0.060964335 | 0 | 0 | 0.114116024 | 0 | 0 | 0.011155821 | 0.179959851 | 0 | 0.039437824 | 0.199664468 | 0 | 0.013863337 | 0.22250836 | 0 | 0.022719634 | 0.047945149 | 0 | 0.02654202 | 0 |
| GSM1627763_con | 0.013315264 | 0 | 0.168348768 | 0.028167632 | 0 | 0.218432597 | 0 | 0 | 0 | 0.052544768 | 0 | 0.053314768 | 0.044584391 | 0 | 0.045013389 | 0.275997526 | 0.024040479 | 0 | 0.068750072 | 0 | 0.004097859 | 0.003392487 |
| GSM1627765_con | 0.088546925 | 0 | 0.02650316 | 0.006743535 | 0 | 0.345024679 | 0 | 0 | 0 | 0.01833598 | 0 | 0.027795635 | 0.164239623 | 0 | 0.036308311 | 0.140619216 | 0 | 0.012250294 | 0.133632643 | 0 | 0 | 0 |
| GSM1627767_con | 0.103507974 | 0 | 0.101710127 | 0.094645524 | 0 | 0.222047864 | 0 | 0 | 0.013790489 | 0 | 0.014033082 | 0 | 0.039795216 | 0.023562476 | 0.049322976 | 0.130606843 | 0 | 0 | 0.169788572 | 0 | 0 | 0.037188857 |
| GSM1627771_con | 0.078080792 | 0 | 0.057856352 | 0 | 0 | 0.248741339 | 0 | 0 | 0 | 0.108974572 | 0 | 0.054808084 | 0.075769017 | 0 | 0.067638787 | 0.26451793 | 0 | 0.002280101 | 0.008213539 | 0.033119487 | 0 | 0 |
| GSM1627772_con | 0.138927542 | 0 | 0 | 0.091050418 | 0 | 0.170703953 | 0 | 0 | 0.038072289 | 0.037330335 | 0 | 5.26E-05 | 0.179807654 | 0.036871181 | 0.051946285 | 0.078151559 | 0 | 0.027587916 | 0.132701857 | 0 | 0 | 0.016796425 |
| GSM1627773_con | 0.035414539 | 0 | 0.153594105 | 0.013485162 | 0 | 0.093419893 | 0.046050997 | 0 | 0 | 0.020426379 | 0 | 0.113735388 | 0.140177511 | 0 | 0.056078466 | 0.245081706 | 0.002076898 | 0 | 0.075488576 | 0 | 0 | 0.004970381 |
| GSM2385757_con | 0.080993367 | 0 | 0.056720199 | 0 | 0 | 0.217326829 | 0.0239025 | 0 | 0 | 0.073941657 | 0 | 0.027375907 | 0.043919471 | 0 | 0.032154041 | 0.148954908 | 0.011827663 | 0 | 0.053187621 | 0 | 0.085319204 | 0.144376633 |
| GSM2385758_con | 0.107014432 | 0 | 0.063114679 | 0.031519643 | 0 | 0.417485346 | 0.042414554 | 0 | 0 | 0.110185559 | 0 | 0 | 0.002751222 | 0 | 0.009412547 | 0.13636237 | 0.019005549 | 0 | 0.058059405 | 0 | 0.002674693 | 0 |
| GSM2385759_con | 0.007329449 | 0 | 0.105445669 | 0.010445812 | 0 | 0.197492239 | 0 | 0 | 0 | 0.219128812 | 0 | 0.038703787 | 0.038272984 | 0 | 0.054609432 | 0.293186984 | 6.09E-05 | 0 | 0.011371629 | 0 | 0.0145912 | 0.009361059 |
| GSM2385760_con | 0.11519952 | 0 | 0.080645893 | 0 | 0 | 0.207137958 | 0.00176452 | 0 | 0 | 0.107911907 | 0 | 0.030554286 | 0.061088736 | 0 | 0.038611655 | 0.132624713 | 0.088975112 | 0 | 0.110336109 | 0 | 0 | 0.02514959 |
| GSM2385761_con | 0.092954058 | 0 | 0.124572916 | 0 | 0 | 0.201043215 | 0 | 0 | 0 | 0.084290707 | 0 | 0.003201084 | 0.075611795 | 0 | 0.032740279 | 0.119767944 | 0 | 0.006816804 | 0 | 0.073407411 | 0.015945004 | 0.169648782 |
| GSM2385762_con | 0.116130613 | 0 | 0.098400457 | 0 | 0 | 0.178957399 | 0.024034525 | 0 | 0 | 0.064443321 | 0 | 0.028027161 | 0.115644705 | 0 | 0.063373074 | 0.138884084 | 0.031563138 | 0.00880021 | 0 | 0.077584634 | 0 | 0.05415668 |
| GSM2385763_con | 0.031649743 | 0 | 0.096148803 | 0 | 0 | 0.144874457 | 0 | 0 | 0 | 0.094749305 | 0 | 0.02073316 | 0.129950812 | 0.039107235 | 0.034117395 | 0.136485241 | 0 | 0 | 0 | 0.185495324 | 0.066206903 | 0.020481622 |
| GSM2385764_con | 0.012575106 | 0 | 0.029219356 | 0 | 0 | 0.282776078 | 0.048881595 | 0 | 0 | 0.071150919 | 0 | 0.010767345 | 0.061105414 | 0 | 0.049687147 | 0.143773284 | 0 | 0.00023861 | 0 | 0.118603186 | 0.068941465 | 0.102280495 |
| GSM2385766_con | 0.11189768 | 0 | 0.081217057 | 0.045976568 | 0 | 0.195043967 | 0.016950576 | 0 | 0 | 0.070949298 | 0 | 0.020215651 | 0.220132034 | 0.000654573 | 0.036789815 | 0.049625209 | 0.001321903 | 0.012845747 | 0 | 0.082133319 | 0 | 0.054246604 |
| GSM2385768_con | 0.089447088 | 0 | 0.049251913 | 0 | 0 | 0.245795251 | 0.01939764 | 0.006353489 | 0 | 0.112759793 | 0 | 0.02957088 | 0.025863862 | 0 | 0.057705036 | 0.102828061 | 0 | 0.020448304 | 0 | 0.130215724 | 0 | 0.110362959 |
| GSM2385769_con | 0.077163208 | 0 | 0.121297522 | 0 | 0 | 0.168868066 | 0.066238371 | 0 | 0 | 0.075561989 | 0 | 0.020500166 | 0.208255011 | 0 | 0.048935111 | 0.041939468 | 0 | 0.02484166 | 0 | 0.085308482 | 0 | 0.061090945 |
| GSM2385770_con | 0.105820414 | 0 | 0.070913968 | 0 | 0 | 0.284741838 | 0 | 0 | 0 | 0.06615823 | 0 | 0.002429097 | 0.113370736 | 0 | 0.012977627 | 0.110926735 | 0 | 0.027300781 | 0 | 0.092782808 | 0 | 0.112577767 |
| GSM2385772_con | 0.120492529 | 0 | 0.07843593 | 0 | 0 | 0.177906922 | 0 | 0 | 0 | 0.072033207 | 0 | 0.022700913 | 0.179434031 | 0 | 0 | 0.193405781 | 0 | 0.027994991 | 0 | 0.071875533 | 0 | 0.055720162 |
| GSM2385775_con | 0.108145927 | 0 | 0.178891961 | 0.008330565 | 0 | 0.083607892 | 0.062688819 | 0 | 0 | 0.047484444 | 0 | 0.069992232 | 0.140039975 | 0 | 0.021378993 | 0.096613098 | 0.024076946 | 0.04423286 | 0 | 0.079892729 | 0 | 0.034623559 |
| GSM2385776_con | 0.14945546 | 0 | 0.070074641 | 0.006838927 | 0 | 0.119030578 | 0.043923016 | 0 | 0 | 0.001376023 | 0 | 0.056379869 | 0.167908769 | 0.002961322 | 0.006365903 | 0.175640631 | 0 | 0.04213164 | 0 | 0.027212097 | 0 | 0.130701124 |
| GSM2385779_con | 0.013818428 | 0 | 0.122778625 | 0 | 0 | 0.141782826 | 0 | 0.028260364 | 0 | 0.007530397 | 0 | 0.06343133 | 0.140166024 | 0.04674343 | 0.081967419 | 0.132011924 | 0 | 0.002159564 | 0 | 0.136149692 | 0.013718981 | 0.069480997 |
| GSM2385780_con | 0.01013671 | 0 | 0.163048491 | 0 | 0 | 0.15899543 | 0 | 0 | 0.016843519 | 0.02096514 | 0 | 0.030173372 | 0.097394957 | 0.058275181 | 0.056336356 | 0.142152684 | 0 | 0 | 0.047931376 | 0.084339021 | 0 | 0.113407763 |
| GSM2385781_con | 0.057393583 | 0 | 0.09355863 | 0 | 0 | 0.150355787 | 0.015491595 | 0 | 0 | 0.059435202 | 0 | 0.02858186 | 0.13543531 | 0 | 0.004636036 | 0.122774456 | 0 | 0.046397456 | 0 | 0.124581884 | 0.035308888 | 0.126049313 |
| GSM2863107_treat | 0.022356816 | 0 | 0.076216809 | 0.02044357 | 0 | 0.38520071 | 0.009271561 | 0 | 0 | 0.096331814 | 0 | 0.061919286 | 0.028198124 | 0.016108083 | 0.03628161 | 0.115621621 | 0.000151572 | 0.008732965 | 0.106561837 | 0 | 0 | 0.01660362 |
| GSM2863108_treat | 0.096405035 | 0 | 0.146218512 | 0 | 0 | 0.21395293 | 0 | 0 | 0 | 0.121116934 | 0 | 0.018087042 | 0.108119334 | 0 | 0.03661214 | 0.147555845 | 0.032799394 | 0.00128164 | 0.044371332 | 0.033479861 | 0 | 0 |
| GSM2863109_treat | 0.020651005 | 0 | 0.095393802 | 0.034134977 | 0 | 0.233147704 | 0 | 0 | 0 | 0.131362188 | 0 | 0.065310552 | 0.000155739 | 0 | 0.067521487 | 0.194674224 | 0 | 0 | 0.121436045 | 0 | 0 | 0.036212278 |
| GSM2863110_treat | 0.098821484 | 0 | 0.05033985 | 0.053558016 | 0 | 0.146207966 | 0.04579627 | 0 | 0 | 0.140098095 | 0 | 0.021349381 | 0.124436791 | 0.018915361 | 0.055682504 | 0.12407375 | 0.02296216 | 0 | 0.075298117 | 0 | 0.022460254 | 0 |
| GSM1627775_treat | 0.04521031 | 0 | 0.080991891 | 0.074657601 | 0 | 0.09247723 | 0 | 0 | 0 | 0.207070502 | 0 | 0.040792207 | 0.090913268 | 0 | 0.032648976 | 0.20431807 | 0 | 0.029030787 | 0.074861977 | 0 | 0 | 0.02702718 |
| GSM1627776_treat | 0.037311734 | 0 | 0.055404205 | 0 | 0 | 0.172388328 | 0.074582063 | 0 | 0 | 0.125780654 | 0 | 0 | 0.019146269 | 0 | 0.024150102 | 0.18171215 | 0.039963943 | 0 | 0.153438302 | 0 | 0.030678981 | 0.085443269 |
| GSM1627778_treat | 0.011578603 | 0 | 0.191055878 | 0 | 0 | 0.085894 | 0 | 0 | 0 | 0.135394256 | 0 | 0.040284634 | 0.057451869 | 0 | 0.012197274 | 0.297362911 | 0 | 0.00193475 | 0.072125524 | 0 | 0 | 0.0947203 |
| GSM1627779_treat | 0.035555058 | 0 | 0.090770983 | 0 | 0 | 0.29244541 | 0.040977869 | 0 | 0 | 0.104544035 | 0 | 0.00154493 | 0.122943644 | 0 | 0.039518858 | 0.144044088 | 0.007861245 | 0.003821195 | 0.070266434 | 0 | 0 | 0.04570625 |
| GSM1627780_treat | 0 | 0 | 0.081430165 | 0 | 0 | 0.172640048 | 0.042574523 | 0 | 0 | 0.179443007 | 0 | 0.022858849 | 0 | 0 | 0.049888152 | 0.258248622 | 0.005992247 | 0 | 0.099550701 | 0 | 0 | 0.087373686 |
| GSM1627781_treat | 0 | 0 | 0.086022092 | 0 | 0 | 0.242912429 | 0.041698327 | 0 | 0 | 0.172984008 | 0 | 0 | 0.161808343 | 0 | 0.066131511 | 0.15364674 | 0 | 0.002244743 | 0.045757648 | 0 | 0 | 0.026794159 |
| GSM1627782_treat | 0 | 0 | 0.054549503 | 0 | 0 | 0.390835974 | 0 | 0 | 0 | 0.081950192 | 0 | 0 | 0.049524495 | 0 | 0.054885237 | 0.181778927 | 0.029208229 | 0.017902527 | 0.081034172 | 0 | 0 | 0.058330744 |
| GSM1627784_treat | 0.122123156 | 0 | 0.107425214 | 0 | 0 | 0.140792128 | 0.046109122 | 0 | 0 | 0.084063253 | 0 | 0.021495216 | 0.11570524 | 0 | 0.068038241 | 0.21897978 | 0 | 0.006638891 | 0.023727845 | 0 | 0 | 0.044901915 |
| GSM1627785_treat | 0.088297571 | 0 | 0.116388388 | 0 | 0 | 0.267335329 | 0 | 0 | 0 | 0.105707796 | 0 | 0.029418553 | 0.056572937 | 0 | 0.033063792 | 0.201924126 | 0.024309065 | 0.00428349 | 0.062381621 | 0 | 0 | 0.010317333 |
| GSM1627786_treat | 0 | 0 | 0.077689147 | 0.053043914 | 0 | 0.14384224 | 0 | 0.000516378 | 0 | 0.14932211 | 0 | 0.048394466 | 0.157931622 | 0 | 0.019484273 | 0.143180727 | 0 | 0.078410202 | 0.082038252 | 0 | 0 | 0.046146669 |
| GSM1627787_treat | 0.101256557 | 0 | 0.012292231 | 0 | 0 | 0.337169215 | 0 | 0.029521025 | 0 | 0.109973673 | 0 | 0.005568955 | 0.08331116 | 0 | 0.043818195 | 0.161660769 | 0 | 0.058545867 | 0 | 0.036597766 | 0 | 0.020284587 |
| GSM1627788_treat | 0.104226213 | 0 | 0.036706409 | 0.064083122 | 0 | 0.226906521 | 0 | 0 | 0.009649626 | 0.00434018 | 0 | 0.049062606 | 0.18347386 | 0 | 0.058123457 | 0.16272904 | 0.045727851 | 0.014419404 | 0.008424812 | 0.0321269 | 0 | 0 |
| GSM1627790_treat | 0.045011392 | 0 | 0.089143436 | 8.32E-05 | 0 | 0.3936156 | 0 | 0 | 0 | 0.045481651 | 0.016854234 | 0.007962616 | 0.056589489 | 0 | 0.031290338 | 0.175992988 | 0 | 0.040088212 | 0.028397635 | 0 | 0 | 0.069489174 |
| GSM1627791_treat | 0 | 0.012776522 | 0.046667396 | 0 | 0 | 0.213981468 | 0.010612257 | 0 | 0 | 0.20669266 | 0 | 0.000777243 | 0.054703069 | 0 | 0.010496414 | 0.175328288 | 0 | 0.011942395 | 0.126124305 | 0 | 0.004832 | 0.125065983 |
| GSM1627792_treat | 0.064915427 | 0 | 0.080365722 | 0 | 0 | 0.297475649 | 0 | 0.007858655 | 0.0110963 | 0.044832106 | 0 | 0.021647894 | 0.125267652 | 0 | 0.090641444 | 0.147738311 | 0.006311409 | 0 | 0 | 0.101849432 | 0 | 0 |
| GSM1627793_treat | 0.119842011 | 0 | 0 | 0.006280706 | 0 | 0.147624904 | 0 | 0 | 0.072944825 | 0 | 0.013109142 | 0.109025933 | 0.199777624 | 0.093517183 | 0.046819226 | 0.09555553 | 0 | 0.032097007 | 0.063405907 | 0 | 0 | 0 |
| GSM1627795_treat | 0.022606112 | 0 | 0.19040427 | 0.102618826 | 0 | 0 | 0 | 0.012266356 | 0.041132825 | 0 | 0.048515272 | 0 | 0.147170498 | 0 | 0.040216845 | 0.236395401 | 0 | 0.044566744 | 0.114106853 | 0 | 0 | 0 |
| GSM1627796_treat | 0.119220825 | 0 | 0.01981625 | 0.041520717 | 0 | 0.18965396 | 0.018018943 | 0 | 0.018709339 | 0.056385194 | 0 | 0.015659915 | 0.102365917 | 0.044689079 | 0 | 0.185542206 | 0 | 0.019679903 | 0.141501795 | 0 | 0 | 0.027235957 |
| GSM1627797_treat | 0.064167194 | 0 | 0.080286823 | 0.003841156 | 0 | 0.167000084 | 0 | 0 | 0 | 0.052036936 | 0 | 0.016901046 | 0.155849347 | 0 | 0.080546149 | 0.113955889 | 0 | 0.004979178 | 0 | 0.052823114 | 0 | 0.207613085 |
| GSM1627798_treat | 0.006595383 | 0 | 0.069963932 | 0 | 0 | 0.305077327 | 0.058808783 | 0 | 0 | 0.009308315 | 0 | 0.041155191 | 0.069390333 | 0 | 0.117282544 | 0.234864208 | 0 | 0 | 0.062386912 | 0 | 0 | 0.025167073 |
| GSM1627799_treat | 0.050758782 | 0 | 0.050376262 | 0 | 0 | 0.271250241 | 0 | 0 | 0 | 0.133055194 | 0 | 0.007200001 | 0.091249831 | 0.11354143 | 0.064978597 | 0.138042656 | 0 | 0.02155202 | 0.052153859 | 0 | 0 | 0.005841127 |
| GSM1627800_treat | 0.012233947 | 0 | 0.055536707 | 0 | 0 | 0.233844842 | 0.044018497 | 0 | 0 | 0.090467968 | 0 | 0 | 0.150975517 | 0 | 0.024996652 | 0.174906641 | 0.032153721 | 0.002003388 | 0.169559327 | 0 | 0 | 0.009302793 |
| GSM1627801_treat | 0 | 0 | 0.05585016 | 0 | 0 | 0.299206834 | 0.020861531 | 0 | 0 | 0.179620226 | 0 | 0 | 0.023363992 | 0 | 0.030421741 | 0.183368569 | 0.00024064 | 0.003632886 | 0.203433421 | 0 | 0 | 0 |
| GSM1627802_treat | 0.02427133 | 0 | 0.108874128 | 0 | 0.012449303 | 0.268547482 | 0.05081593 | 0 | 0 | 0.136758238 | 0 | 0.021631652 | 0 | 0 | 0.035003923 | 0.154091056 | 0.009017362 | 0.009221017 | 0.093086142 | 0 | 0.0295951 | 0.046637339 |
| GSM1627803_treat | 0.007665646 | 0 | 0.090389638 | 0 | 0 | 0.249081051 | 0.023807702 | 0 | 0 | 0.186727084 | 0 | 0 | 0.027219419 | 0 | 0.053981811 | 0.149560301 | 0.074232016 | 0 | 0.059906394 | 0 | 0 | 0.077428939 |
| GSM1627804_treat | 0.020552596 | 0 | 0.054045992 | 0.09407246 | 0 | 0.175245739 | 0 | 0.031370329 | 0.014734094 | 0.01486745 | 0.003085662 | 0 | 0.058489776 | 0 | 0.043743743 | 0.151590576 | 0 | 0.031944756 | 0 | 0.197610208 | 0 | 0.10864662 |
| GSM1627805_treat | 0.048525496 | 0 | 0.080758553 | 0.019547169 | 0 | 0.24787109 | 0.014681252 | 0 | 0.015326644 | 0.055186713 | 0 | 0 | 0.074569473 | 0.10137705 | 0.064745441 | 0.154494255 | 0.078730809 | 0 | 0 | 0.011296935 | 0 | 0.032889119 |
| GSM2385721_treat | 0.031625083 | 0 | 0.069963954 | 0.090608779 | 0 | 0.28040918 | 0.01335328 | 0 | 0.033962533 | 0.023047161 | 0 | 0.072036813 | 0.038669957 | 0.064729701 | 0.086428826 | 0 | 0.057086368 | 0 | 0.138078365 | 0 | 0 | 0 |
| GSM2385728_treat | 0.022425163 | 0 | 0.088450194 | 0.019486554 | 0 | 0.215218646 | 0 | 0 | 0 | 0.158005726 | 0.018239964 | 0 | 0.066172568 | 0 | 0.085926291 | 0.142882391 | 0.023822781 | 0 | 0.159369722 | 0 | 0 | 0 |
| GSM2385729_treat | 0 | 0.019703032 | 0 | 0.014287866 | 0 | 0.288273722 | 0.04150284 | 0 | 0 | 0.107856399 | 0.019354154 | 0 | 0.042222909 | 0 | 0.032453774 | 0.248197973 | 0.076524422 | 0 | 0.108128295 | 0 | 0 | 0.001494614 |
| GSM2385731_treat | 0.001742609 | 0 | 0.119176209 | 0.062099791 | 0 | 0.229606562 | 0 | 0 | 0.001607686 | 0.203950319 | 0 | 0.011310939 | 0 | 0.046027354 | 0.026620067 | 0.201380394 | 0.01118758 | 0.005551532 | 0.079738958 | 0 | 0 | 0 |
| GSM2385732_treat | 0.023148357 | 0 | 0.044239689 | 0 | 0 | 0.174913024 | 0 | 0 | 0 | 0.107070514 | 0.018729204 | 0.031826151 | 0.021332251 | 0 | 0.051678301 | 0.227869609 | 0.074217401 | 0 | 0.224975499 | 0 | 0 | 0 |
| GSM2385735_treat | 0 | 0 | 0.034463593 | 0.104090119 | 0 | 0.169820437 | 0.004684104 | 0 | 0 | 0.168352964 | 0 | 0.023533217 | 0.007869667 | 0 | 0.043683457 | 0.333241166 | 0.008723734 | 0 | 0.086436285 | 0 | 0 | 0.015101257 |
| GSM2385736_treat | 0 | 0.006522702 | 0.012638957 | 0.068093635 | 0 | 0.203515993 | 0 | 0 | 0 | 0.234840226 | 0 | 0.019392156 | 0 | 0.009211993 | 0.049582309 | 0.258267328 | 0.026941353 | 0 | 0.110993348 | 0 | 0 | 0 |
| GSM2385737_treat | 0.021949918 | 0 | 0.099594288 | 0 | 0 | 0.234046215 | 0.007291364 | 0 | 0 | 0.166715843 | 0 | 0 | 0.070912744 | 0 | 0.058949269 | 0.217121604 | 0.047257163 | 0.020778153 | 0.055383438 | 0 | 0 | 0 |
| GSM2385739_treat | 0.013802915 | 0 | 0.053764674 | 0.036255115 | 0 | 0.255119813 | 0.022253737 | 0 | 0 | 0.084320989 | 0 | 0.014495314 | 0.060851677 | 0 | 0.086959724 | 0.173303415 | 0.010063455 | 0 | 0.183626006 | 0 | 0 | 0.005183165 |
| GSM2385741_treat | 0.031148719 | 0 | 0.027667057 | 0.114990734 | 0 | 0.22920022 | 0 | 0 | 0.046964742 | 0.071193979 | 0 | 0 | 0.078671393 | 0.001313052 | 0.108610344 | 0.114414012 | 0.025838645 | 0 | 0.149987104 | 0 | 0 | 0 |
| GSM2385742_treat | 0.024028019 | 0 | 0.070732935 | 0.040705956 | 0 | 0.257670068 | 0 | 0 | 0 | 0.034812501 | 0.019068492 | 0 | 0.059104997 | 0 | 0.072729114 | 0.15977844 | 0.012935289 | 0 | 0.248434188 | 0 | 0 | 0 |
| GSM2385743_treat | 0.035536518 | 0 | 0.0734601 | 0.006245196 | 0 | 0.255242039 | 0.012592515 | 0 | 0.009611951 | 0.148290231 | 0 | 0.001488541 | 0.049743443 | 0 | 0.067761866 | 0.218499394 | 0.033482602 | 0 | 0.088045604 | 0 | 0 | 0 |
| GSM2385748_treat | 0.009764431 | 0 | 0.054667254 | 0.064696311 | 0 | 0.127427703 | 0.053191804 | 0 | 0 | 0.181990522 | 0.00154616 | 0 | 0.013937265 | 0 | 0.03240747 | 0.241673928 | 0.009175511 | 0 | 0.20952164 | 0 | 0 | 0 |
| GSM2385750_treat | 0.018720864 | 0 | 0.056291232 | 0 | 0 | 0.160778912 | 0.043945792 | 0 | 0 | 0.157583787 | 0 | 0.031260329 | 0.080765515 | 0 | 0.086517504 | 0.270829164 | 0.000302174 | 0 | 0.089595225 | 0 | 0 | 0.003409502 |
| GSM2385753_treat | 0 | 0 | 0.067389206 | 0.041052033 | 0 | 0.159088514 | 0.064215477 | 0 | 0 | 0.152612165 | 0 | 0.01791485 | 0 | 0 | 0.050615491 | 0.210676056 | 0.054172357 | 0 | 0.176915213 | 0 | 0 | 0.005348637 |
| GSM2385754_treat | 0 | 0 | 0.029982781 | 0.06328062 | 0 | 0.305543453 | 0 | 0 | 0.004063869 | 0.151967115 | 0 | 0.000171049 | 0.016380139 | 0.007584662 | 0.105989864 | 0.153885121 | 0.073765282 | 0 | 0.087386046 | 0 | 0 | 0 |
| GSM2385756_treat | 0.011437206 | 0 | 0.065322224 | 0 | 0 | 0.264880362 | 0.027016345 | 0 | 0 | 0.091489959 | 0 | 0.025852779 | 0.063990792 | 0 | 0.05873155 | 0.234525042 | 0.047401937 | 0 | 0.109351803 | 0 | 0 | 0 |
