# Supplementary material for: Identification of Fatty acid metabolism-Related Genes in the Progression from Non-Alcoholic Fatty Liver to Nonalcoholic fatty liver disease
Source: Research Square preprint supplement (doi:10.21203/rs.3.rs-5030401/v1), 2024-10-21
Supplement: Supplementary file 13 [file e3aeed801620e25ee3af1d32.docx]

| Type | ONTOLOGY | ID | Description | pvalue | p.adjust | qvalue | geneID | Count |
| --- | --- | --- | --- | --- | --- | --- | --- | --- |
| ClusterA GO | BP | GO:0070098 | chemokine-mediated signaling pathway | 3.91E-06 | 0.002415129 | 0.001762953 | CXCL6/CCL20/CCL19/CXCL10/ROBO1 | 5 |
| BP | GO:0001501 | skeletal system development | 5.40E-06 | 0.002415129 | 0.001762953 | CHI3L1/EFEMP1/LUM/COL1A2/MGP/TIMP1/GJA1/COL3A1/IGF1 | 9 |
| BP | GO:1990868 | response to chemokine | 6.31E-06 | 0.002415129 | 0.001762953 | CXCL6/CCL20/CCL19/CXCL10/ROBO1 | 5 |
| BP | GO:1990869 | cellular response to chemokine | 6.31E-06 | 0.002415129 | 0.001762953 | CXCL6/CCL20/CCL19/CXCL10/ROBO1 | 5 |
| BP | GO:0030199 | collagen fibril organization | 1.36E-05 | 0.004151656 | 0.003030552 | DPT/LUM/COL1A2/COL3A1 | 4 |
| BP | GO:0120162 | positive regulation of cold-induced thermogenesis | 0.000136455 | 0.03062706 | 0.022356595 | FABP5/FABP4/GJA1/ESRRG | 4 |
| BP | GO:0051216 | cartilage development | 0.000140124 | 0.03062706 | 0.022356595 | CHI3L1/EFEMP1/LUM/MGP/TIMP1 | 5 |
| BP | GO:0030593 | neutrophil chemotaxis | 0.000172057 | 0.032905893 | 0.024020056 | CXCL6/CCL20/CCL19/CXCL10 | 4 |
| BP | GO:0009612 | response to mechanical stimulus | 0.000211076 | 0.035882889 | 0.026193151 | CHI3L1/AQP1/CXCL10/GJA1/COL3A1 | 5 |
| BP | GO:0007566 | embryo implantation | 0.000333714 | 0.043784993 | 0.031961388 | SPP1/TIMP1/GJA1 | 3 |
| BP | GO:1990266 | neutrophil migration | 0.000339538 | 0.043784993 | 0.031961388 | CXCL6/CCL20/CCL19/CXCL10 | 4 |
| BP | GO:0071621 | granulocyte chemotaxis | 0.00035016 | 0.043784993 | 0.031961388 | CXCL6/CCL20/CCL19/CXCL10 | 4 |
| BP | GO:0010559 | regulation of glycoprotein biosynthetic process | 0.00046661 | 0.043784993 | 0.031961388 | CCL19/ITM2A/IGF1 | 3 |
| BP | GO:2000242 | negative regulation of reproductive process | 0.000491597 | 0.043784993 | 0.031961388 | TIMP1/GJA1/IGF1 | 3 |
| BP | GO:0061448 | connective tissue development | 0.0004935 | 0.043784993 | 0.031961388 | CHI3L1/EFEMP1/LUM/MGP/TIMP1 | 5 |
| BP | GO:0106106 | cold-induced thermogenesis | 0.000616254 | 0.043784993 | 0.031961388 | FABP5/FABP4/GJA1/ESRRG | 4 |
| BP | GO:0120161 | regulation of cold-induced thermogenesis | 0.000616254 | 0.043784993 | 0.031961388 | FABP5/FABP4/GJA1/ESRRG | 4 |
| BP | GO:1903018 | regulation of glycoprotein metabolic process | 0.000629401 | 0.043784993 | 0.031961388 | CCL19/ITM2A/IGF1 | 3 |
| BP | GO:0030198 | extracellular matrix organization | 0.000642426 | 0.043784993 | 0.031961388 | SPP1/DPT/LUM/COL1A2/TIMP1/COL3A1 | 6 |
| BP | GO:0043062 | extracellular structure organization | 0.000651027 | 0.043784993 | 0.031961388 | SPP1/DPT/LUM/COL1A2/TIMP1/COL3A1 | 6 |
| BP | GO:0045229 | external encapsulating structure organization | 0.000668497 | 0.043784993 | 0.031961388 | SPP1/DPT/LUM/COL1A2/TIMP1/COL3A1 | 6 |
| BP | GO:0097530 | granulocyte migration | 0.000682979 | 0.043784993 | 0.031961388 | CXCL6/CCL20/CCL19/CXCL10 | 4 |
| BP | GO:0048247 | lymphocyte chemotaxis | 0.000690742 | 0.043784993 | 0.031961388 | CCL20/CCL19/CXCL10 | 3 |
| BP | GO:0015908 | fatty acid transport | 0.000718193 | 0.043784993 | 0.031961388 | PLA2G2A/FABP5/FABP4/GJA1 | 4 |
| BP | GO:1901163 | regulation of trophoblast cell migration | 0.000735868 | 0.043784993 | 0.031961388 | TIMP1/GJA1 | 2 |
| BP | GO:1990845 | adaptive thermogenesis | 0.0007734 | 0.043784993 | 0.031961388 | FABP5/FABP4/GJA1/ESRRG | 4 |
| BP | GO:0002548 | monocyte chemotaxis | 0.000824575 | 0.043784993 | 0.031961388 | CCL20/CCL19/CXCL10 | 3 |
| BP | GO:0061450 | trophoblast cell migration | 0.000839539 | 0.043784993 | 0.031961388 | TIMP1/GJA1 | 2 |
| BP | GO:1904862 | inhibitory synapse assembly | 0.000839539 | 0.043784993 | 0.031961388 | GABRB3/FGF13 | 2 |
| BP | GO:0031214 | biomineral tissue development | 0.000913791 | 0.043784993 | 0.031961388 | SPP1/COL1A2/MGP/IGF1 | 4 |
| BP | GO:0046579 | positive regulation of Ras protein signal transduction | 0.000935046 | 0.043784993 | 0.031961388 | ROBO1/COL3A1/IGF1 | 3 |
| BP | GO:0048670 | regulation of collateral sprouting | 0.000949834 | 0.043784993 | 0.031961388 | SPP1/FGF13 | 2 |
| BP | GO:0110148 | biomineralization | 0.000956994 | 0.043784993 | 0.031961388 | SPP1/COL1A2/MGP/IGF1 | 4 |
| BP | GO:0015909 | long-chain fatty acid transport | 0.000973849 | 0.043784993 | 0.031961388 | PLA2G2A/FABP5/FABP4 | 3 |
| BP | GO:1903034 | regulation of response to wounding | 0.001001617 | 0.043784993 | 0.031961388 | FKBP1B/TSPAN8/SPP1/GJA1 | 4 |
| BP | GO:0046503 | glycerolipid catabolic process | 0.001054485 | 0.044815592 | 0.032713687 | ENPP2/FABP5/FABP4 | 3 |
| BP | GO:0001659 | temperature homeostasis | 0.001169354 | 0.046690655 | 0.034082412 | FABP5/FABP4/GJA1/ESRRG | 4 |
| BP | GO:0051057 | positive regulation of small GTPase mediated signal transduction | 0.001183164 | 0.046690655 | 0.034082412 | ROBO1/COL3A1/IGF1 | 3 |
| BP | GO:0071731 | response to nitric oxide | 0.001190154 | 0.046690655 | 0.034082412 | CCL19/AQP1 | 2 |
| BP | GO:0046697 | decidualization | 0.00132011 | 0.050494198 | 0.036858854 | SPP1/GJA1 | 2 |
| BP | GO:0019932 | second-messenger-mediated signaling | 0.001407415 | 0.052520625 | 0.038338069 | CCL20/FKBP1B/AQP1/IGF1/RCAN2 | 5 |
| BP | GO:0007204 | positive regulation of cytosolic calcium ion concentration | 0.001469063 | 0.053515872 | 0.039064562 | CD24/FKBP1B/CCL19/CXCL10/GJA1 | 5 |
| BP | GO:0035584 | calcium-mediated signaling using intracellular calcium source | 0.001599439 | 0.05561685 | 0.040598196 | CCL20/FKBP1B | 2 |
| BP | GO:2000648 | positive regulation of stem cell proliferation | 0.001599439 | 0.05561685 | 0.040598196 | EPCAM/GJA1 | 2 |
| BP | GO:0070371 | ERK1 and ERK2 cascade | 0.001689026 | 0.056034122 | 0.040902789 | CHI3L1/PLA2G2A/CCL20/CCL19/IGF1 | 5 |
| BP | GO:0048668 | collateral sprouting | 0.001748743 | 0.056034122 | 0.040902789 | SPP1/FGF13 | 2 |
| BP | GO:0033273 | response to vitamin | 0.001795492 | 0.056034122 | 0.040902789 | FKBP1B/CXCL10/SPP1 | 3 |
| BP | GO:0046470 | phosphatidylcholine metabolic process | 0.001853887 | 0.056034122 | 0.040902789 | ENPP2/PLA2G2A/FABP5 | 3 |
| BP | GO:1903035 | negative regulation of response to wounding | 0.001853887 | 0.056034122 | 0.040902789 | TSPAN8/SPP1/GJA1 | 3 |
| BP | GO:0042098 | T cell proliferation | 0.001893911 | 0.056034122 | 0.040902789 | CD24/FKBP1B/CCL19/IGF1 | 4 |
| BP | GO:0010560 | positive regulation of glycoprotein biosynthetic process | 0.001904428 | 0.056034122 | 0.040902789 | CCL19/IGF1 | 2 |
| BP | GO:0086064 | cell communication by electrical coupling involved in cardiac conduction | 0.001904428 | 0.056034122 | 0.040902789 | FKBP1B/GJA1 | 2 |
| BP | GO:0019722 | calcium-mediated signaling | 0.002002204 | 0.057485125 | 0.041961966 | CCL20/FKBP1B/IGF1/RCAN2 | 4 |
| BP | GO:0045765 | regulation of angiogenesis | 0.002063225 | 0.057485125 | 0.041961966 | THBS2/ENPP2/CHI3L1/AQP1/CXCL10 | 5 |
| BP | GO:0007026 | negative regulation of microtubule depolymerization | 0.002066459 | 0.057485125 | 0.041961966 | STMN2/FGF13 | 2 |
| BP | GO:0016042 | lipid catabolic process | 0.002200483 | 0.058952537 | 0.043033121 | ENPP2/PLA2G2A/FABP5/SPP1/FABP4 | 5 |
| BP | GO:1901342 | regulation of vasculature development | 0.002228717 | 0.058952537 | 0.043033121 | THBS2/ENPP2/CHI3L1/AQP1/CXCL10 | 5 |
| BP | GO:0042104 | positive regulation of activated T cell proliferation | 0.002234802 | 0.058952537 | 0.043033121 | CD24/IGF1 | 2 |
| BP | GO:0031346 | positive regulation of cell projection organization | 0.00231501 | 0.059032759 | 0.04309168 | ENPP2/FKBP1B/CCL19/STMN2/ROBO1 | 5 |
| BP | GO:0051480 | regulation of cytosolic calcium ion concentration | 0.00231501 | 0.059032759 | 0.04309168 | CD24/FKBP1B/CCL19/CXCL10/GJA1 | 5 |
| BP | GO:1903020 | positive regulation of glycoprotein metabolic process | 0.002409424 | 0.059160768 | 0.043185122 | CCL19/IGF1 | 2 |
| BP | GO:0042102 | positive regulation of T cell proliferation | 0.002433285 | 0.059160768 | 0.043185122 | CD24/CCL19/IGF1 | 3 |
| BP | GO:0051651 | maintenance of location in cell | 0.002436032 | 0.059160768 | 0.043185122 | FKBP1B/CCL19/CXCL10/GJA1 | 4 |
| BP | GO:0070374 | positive regulation of ERK1 and ERK2 cascade | 0.002478427 | 0.059249893 | 0.04325018 | CHI3L1/PLA2G2A/CCL20/CCL19 | 4 |
| BP | GO:0007163 | establishment or maintenance of cell polarity | 0.002564739 | 0.060047625 | 0.043832494 | CCL19/AQP1/GJA1/FGF13 | 4 |
| BP | GO:0001893 | maternal placenta development | 0.00259029 | 0.060047625 | 0.043832494 | SPP1/GJA1 | 2 |
| BP | GO:0031114 | regulation of microtubule depolymerization | 0.002777366 | 0.062490746 | 0.04561588 | STMN2/FGF13 | 2 |
| BP | GO:0048679 | regulation of axon regeneration | 0.002777366 | 0.062490746 | 0.04561588 | FKBP1B/SPP1 | 2 |
| BP | GO:0097529 | myeloid leukocyte migration | 0.002836062 | 0.062886603 | 0.045904841 | CXCL6/CCL20/CCL19/CXCL10 | 4 |
| BP | GO:0007229 | integrin-mediated signaling pathway | 0.002953459 | 0.063566414 | 0.046401077 | ITGBL1/TIMP1/COL3A1 | 3 |
| BP | GO:2000406 | positive regulation of T cell migration | 0.00297062 | 0.063566414 | 0.046401077 | CCL20/CXCL10 | 2 |
| BP | GO:0021987 | cerebral cortex development | 0.003032907 | 0.063566414 | 0.046401077 | ROBO1/COL3A1/FGF13 | 3 |
| BP | GO:0048640 | negative regulation of developmental growth | 0.003032907 | 0.063566414 | 0.046401077 | SPP1/GJA1/FGF13 | 3 |
| BP | GO:0010644 | cell communication by electrical coupling | 0.003170018 | 0.064668372 | 0.047205465 | FKBP1B/GJA1 | 2 |
| BP | GO:0019835 | cytolysis | 0.003170018 | 0.064668372 | 0.047205465 | PLA2G2A/C7 | 2 |
| BP | GO:0030595 | leukocyte chemotaxis | 0.003227636 | 0.064977402 | 0.047431044 | CXCL6/CCL20/CCL19/CXCL10 | 4 |
| BP | GO:0070570 | regulation of neuron projection regeneration | 0.003375526 | 0.065336681 | 0.047693305 | FKBP1B/SPP1 | 2 |
| BP | GO:0043406 | positive regulation of MAP kinase activity | 0.003436627 | 0.065336681 | 0.047693305 | CD24/CCL19/ROBO1/IGF1 | 4 |
| BP | GO:0051209 | release of sequestered calcium ion into cytosol | 0.003449881 | 0.065336681 | 0.047693305 | FKBP1B/CCL19/CXCL10 | 3 |
| BP | GO:0021537 | telencephalon development | 0.003490282 | 0.065336681 | 0.047693305 | AQP1/ROBO1/COL3A1/FGF13 | 4 |
| BP | GO:0030282 | bone mineralization | 0.003537269 | 0.065336681 | 0.047693305 | COL1A2/MGP/IGF1 | 3 |
| BP | GO:0051283 | negative regulation of sequestering of calcium ion | 0.003537269 | 0.065336681 | 0.047693305 | FKBP1B/CCL19/CXCL10 | 3 |
| BP | GO:0035025 | positive regulation of Rho protein signal transduction | 0.003587112 | 0.065336681 | 0.047693305 | ROBO1/COL3A1 | 2 |
| BP | GO:1901020 | negative regulation of calcium ion transmembrane transporter activity | 0.003587112 | 0.065336681 | 0.047693305 | GEM/FKBP1B | 2 |
| BP | GO:0051282 | regulation of sequestering of calcium ion | 0.003716093 | 0.066889673 | 0.04882693 | FKBP1B/CCL19/CXCL10 | 3 |
| BP | GO:0033280 | response to vitamin D | 0.003804742 | 0.067689007 | 0.049410414 | CXCL10/SPP1 | 2 |
| BP | GO:0051924 | regulation of calcium ion transport | 0.00388196 | 0.068268958 | 0.049833756 | GEM/FKBP1B/CXCL10/GJA1 | 4 |
| CC | GO:0062023 | collagen-containing extracellular matrix | 2.55E-06 | 0.00019057 | 0.000165295 | THBS2/EFEMP1/FREM2/DPT/LUM/COL1A2/MGP/TIMP1/COL3A1 | 9 |
| CC | GO:0005583 | fibrillar collagen trimer | 4.57E-06 | 0.00019057 | 0.000165295 | LUM/COL1A2/COL3A1 | 3 |
| CC | GO:0098643 | banded collagen fibril | 4.57E-06 | 0.00019057 | 0.000165295 | LUM/COL1A2/COL3A1 | 3 |
| CC | GO:0098644 | complex of collagen trimers | 2.72E-05 | 0.000848666 | 0.000736107 | LUM/COL1A2/COL3A1 | 3 |
| CC | GO:0005581 | collagen trimer | 0.001897849 | 0.044958453 | 0.038995542 | LUM/COL1A2/COL3A1 | 3 |
| CC | GO:0031091 | platelet alpha granule | 0.002158006 | 0.044958453 | 0.038995542 | THBS2/TIMP1/IGF1 | 3 |
| MF | GO:0005201 | extracellular matrix structural constituent | 1.28E-09 | 2.58E-07 | 1.82E-07 | THBS2/CHI3L1/EFEMP1/TFPI2/DPT/LUM/COL1A2/MGP/COL3A1 | 9 |
| MF | GO:0048018 | receptor ligand activity | 1.13E-07 | 8.60E-06 | 6.05E-06 | CXCL6/IL32/CCL20/NTS/EFEMP1/CCL19/CXCL10/SPP1/TIMP1/IGF1/FGF13 | 11 |
| MF | GO:0030546 | signaling receptor activator activity | 1.28E-07 | 8.60E-06 | 6.05E-06 | CXCL6/IL32/CCL20/NTS/EFEMP1/CCL19/CXCL10/SPP1/TIMP1/IGF1/FGF13 | 11 |
| MF | GO:0005125 | cytokine activity | 4.85E-06 | 0.000244763 | 0.000172189 | CXCL6/IL32/CCL20/CCL19/CXCL10/SPP1/TIMP1 | 7 |
| MF | GO:0008009 | chemokine activity | 1.20E-05 | 0.000483415 | 0.000340078 | CXCL6/CCL20/CCL19/CXCL10 | 4 |
| MF | GO:0042379 | chemokine receptor binding | 4.68E-05 | 0.001574985 | 0.001107989 | CXCL6/CCL20/CCL19/CXCL10 | 4 |
| MF | GO:0005178 | integrin binding | 5.52E-05 | 0.001593681 | 0.001121141 | TSPAN8/SPP1/ITGBL1/COL3A1/IGF1 | 5 |
| MF | GO:0048407 | platelet-derived growth factor binding | 0.000443363 | 0.011194923 | 0.007875532 | COL1A2/COL3A1 | 2 |
| MF | GO:0008191 | metalloendopeptidase inhibitor activity | 0.000958421 | 0.019954249 | 0.014037643 | LXN/TIMP1 | 2 |
| MF | GO:0005324 | long-chain fatty acid transporter activity | 0.001084202 | 0.019954249 | 0.014037643 | FABP5/FABP4 | 2 |
| MF | GO:0045236 | CXCR chemokine receptor binding | 0.001217472 | 0.019954249 | 0.014037643 | CXCL6/CXCL10 | 2 |
| MF | GO:0008083 | growth factor activity | 0.00122732 | 0.019954249 | 0.014037643 | EFEMP1/TIMP1/IGF1/FGF13 | 4 |
| MF | GO:0008201 | heparin binding | 0.001284184 | 0.019954249 | 0.014037643 | CXCL6/THBS2/CXCL10/LXN | 4 |
| MF | GO:0001664 | G protein-coupled receptor binding | 0.001452575 | 0.020958587 | 0.014744186 | CXCL6/CCL20/NTS/CCL19/CXCL10 | 5 |
| MF | GO:0005217 | intracellular ligand-gated ion channel activity | 0.003165646 | 0.042630698 | 0.02999033 | FKBP1B/AQP1 | 2 |
| MF | GO:0019207 | kinase regulator activity | 0.003727889 | 0.047064601 | 0.033109542 | CD24/CXCL10/CISH/FGF13 | 4 |
| MF | GO:0005539 | glycosaminoglycan binding | 0.004232306 | 0.050289758 | 0.035378412 | CXCL6/THBS2/CXCL10/LXN | 4 |
| MF | GO:0005501 | retinoid binding | 0.005116816 | 0.054399837 | 0.038269818 | FABP5/RBP7 | 2 |
| MF | GO:0005504 | fatty acid binding | 0.005116816 | 0.054399837 | 0.038269818 | FABP5/FABP4 | 2 |
| MF | GO:0019840 | isoprenoid binding | 0.005391136 | 0.054450475 | 0.038305441 | FABP5/RBP7 | 2 |
| MF | GO:0030020 | extracellular matrix structural constituent conferring tensile strength | 0.006253712 | 0.056423411 | 0.039693384 | COL1A2/COL3A1 | 2 |
| MF | GO:0002020 | protease binding | 0.006433841 | 0.056423411 | 0.039693384 | COL1A2/TIMP1/COL3A1 | 3 |
| MF | GO:1901681 | sulfur compound binding | 0.006710699 | 0.056423411 | 0.039693384 | CXCL6/THBS2/CXCL10/LXN | 4 |
| MF | GO:0005246 | calcium channel regulator activity | 0.007494803 | 0.056423411 | 0.039693384 | GEM/FKBP1B | 2 |
| MF | GO:0015276 | ligand-gated ion channel activity | 0.007572849 | 0.056423411 | 0.039693384 | FKBP1B/AQP1/GABRB3 | 3 |
| MF | GO:0022834 | ligand-gated channel activity | 0.007572849 | 0.056423411 | 0.039693384 | FKBP1B/AQP1/GABRB3 | 3 |
| MF | GO:0005126 | cytokine receptor binding | 0.00764774 | 0.056423411 | 0.039693384 | CXCL6/CCL20/CCL19/CXCL10 | 4 |
| MF | GO:0048020 | CCR chemokine receptor binding | 0.007821067 | 0.056423411 | 0.039693384 | CCL20/CCL19 | 2 |
| MF | GO:0016247 | channel regulator activity | 0.008500598 | 0.059211064 | 0.041654475 | GEM/FKBP1B/FGF13 | 3 |
| MF | GO:0098632 | cell-cell adhesion mediator activity | 0.00883763 | 0.059506712 | 0.04186246 | EPCAM/PALLD | 2 |
| Cluster B GO | BP | GO:0071280 | cellular response to copper ion | 1.97E-07 | 0.000160176 | 0.000116967 | MT1F/AOC1/MT1M/CYP1A2 | 4 |
| BP | GO:0046688 | response to copper ion | 1.06E-06 | 0.000429825 | 0.000313875 | MT1F/AOC1/MT1M/CYP1A2 | 4 |
| BP | GO:0042445 | hormone metabolic process | 2.73E-06 | 0.000739715 | 0.000540169 | DGAT2/HSD17B14/MME/SLC16A10/DHRS2/CYP1A2 | 6 |
| BP | GO:0009084 | glutamine family amino acid biosynthetic process | 3.91E-06 | 0.000794632 | 0.000580271 | NAGS/GLUL/OAT | 3 |
| BP | GO:1901606 | alpha-amino acid catabolic process | 2.07E-05 | 0.002776569 | 0.002027558 | GCDH/GSTZ1/GLUL/OAT | 4 |
| BP | GO:0071248 | cellular response to metal ion | 2.44E-05 | 0.002776569 | 0.002027558 | PKD2/MT1F/AOC1/MT1M/CYP1A2 | 5 |
| BP | GO:1901605 | alpha-amino acid metabolic process | 2.56E-05 | 0.002776569 | 0.002027558 | GCDH/GSTZ1/NAGS/GLUL/OAT | 5 |
| BP | GO:0008202 | steroid metabolic process | 2.85E-05 | 0.002776569 | 0.002027558 | TSKU/DGAT2/HSD17B14/DHRS2/CYP1A2/CYP2C19 | 6 |
| BP | GO:0006536 | glutamate metabolic process | 3.07E-05 | 0.002776569 | 0.002027558 | NAGS/GLUL/OAT | 3 |
| BP | GO:0010038 | response to metal ion | 4.16E-05 | 0.002953306 | 0.002156619 | PKD2/PKLR/MT1F/AOC1/MT1M/CYP1A2 | 6 |
| BP | GO:0009063 | cellular amino acid catabolic process | 4.31E-05 | 0.002953306 | 0.002156619 | GCDH/GSTZ1/GLUL/OAT | 4 |
| BP | GO:0071241 | cellular response to inorganic substance | 4.61E-05 | 0.002953306 | 0.002156619 | PKD2/MT1F/AOC1/MT1M/CYP1A2 | 5 |
| BP | GO:0071276 | cellular response to cadmium ion | 4.72E-05 | 0.002953306 | 0.002156619 | MT1F/MT1M/CYP1A2 | 3 |
| BP | GO:0034754 | cellular hormone metabolic process | 0.000113824 | 0.006609929 | 0.004826827 | DGAT2/HSD17B14/DHRS2/CYP1A2 | 4 |
| BP | GO:0046686 | response to cadmium ion | 0.000195665 | 0.010605017 | 0.007744196 | MT1F/MT1M/CYP1A2 | 3 |
| BP | GO:1901607 | alpha-amino acid biosynthetic process | 0.000258465 | 0.01313325 | 0.00959041 | NAGS/GLUL/OAT | 3 |
| BP | GO:0046394 | carboxylic acid biosynthetic process | 0.000321649 | 0.013327297 | 0.00973211 | PKLR/NAGS/GLUL/OAT/CYP1A2 | 5 |
| BP | GO:0006520 | cellular amino acid metabolic process | 0.000340124 | 0.013327297 | 0.00973211 | GCDH/GSTZ1/NAGS/GLUL/OAT | 5 |
| BP | GO:0010273 | detoxification of copper ion | 0.000345938 | 0.013327297 | 0.00973211 | MT1F/MT1M | 2 |
| BP | GO:1990169 | stress response to copper ion | 0.000345938 | 0.013327297 | 0.00973211 | MT1F/MT1M | 2 |
| BP | GO:0016053 | organic acid biosynthetic process | 0.000359394 | 0.013327297 | 0.00973211 | PKLR/NAGS/GLUL/OAT/CYP1A2 | 5 |
| BP | GO:0009064 | glutamine family amino acid metabolic process | 0.00036064 | 0.013327297 | 0.00973211 | NAGS/GLUL/OAT | 3 |
| BP | GO:0008652 | cellular amino acid biosynthetic process | 0.000389692 | 0.013774762 | 0.010058867 | NAGS/GLUL/OAT | 3 |
| BP | GO:0061687 | detoxification of inorganic compound | 0.000447029 | 0.015143106 | 0.011058085 | MT1F/MT1M | 2 |
| BP | GO:0097501 | stress response to metal ion | 0.000502322 | 0.016335507 | 0.011928822 | MT1F/MT1M | 2 |
| BP | GO:0006525 | arginine metabolic process | 0.000622346 | 0.018739545 | 0.013684344 | NAGS/OAT | 2 |
| BP | GO:0019373 | epoxygenase P450 pathway | 0.000622346 | 0.018739545 | 0.013684344 | CYP1A2/CYP2C19 | 2 |
| BP | GO:0006631 | fatty acid metabolic process | 0.000734146 | 0.020830605 | 0.015211318 | DGAT2/GCDH/GSTZ1/CYP1A2/CYP2C19 | 5 |
| BP | GO:0043648 | dicarboxylic acid metabolic process | 0.000743035 | 0.020830605 | 0.015211318 | NAGS/GLUL/OAT | 3 |
| BP | GO:0042738 | exogenous drug catabolic process | 0.000825813 | 0.022379525 | 0.016342399 | CYP1A2/CYP2C19 | 2 |
| BP | GO:0071294 | cellular response to zinc ion | 0.000899838 | 0.022693075 | 0.016571365 | MT1F/MT1M | 2 |
| BP | GO:0006637 | acyl-CoA metabolic process | 0.000963808 | 0.022693075 | 0.016571365 | DGAT2/GCDH/GSTZ1 | 3 |
| BP | GO:0035383 | thioester metabolic process | 0.000963808 | 0.022693075 | 0.016571365 | DGAT2/GCDH/GSTZ1 | 3 |
| BP | GO:0009636 | response to toxic substance | 0.000966751 | 0.022693075 | 0.016571365 | GSTZ1/MT1F/DHRS2/MT1M | 4 |
| BP | GO:0042737 | drug catabolic process | 0.000976947 | 0.022693075 | 0.016571365 | CYP1A2/CYP2C19 | 2 |
| BP | GO:0046395 | carboxylic acid catabolic process | 0.001028136 | 0.023218741 | 0.016955228 | GCDH/GSTZ1/GLUL/OAT | 4 |
| BP | GO:0006706 | steroid catabolic process | 0.001057127 | 0.02322823 | 0.016962157 | HSD17B14/CYP1A2 | 2 |
| BP | GO:0044282 | small molecule catabolic process | 0.001122637 | 0.023772311 | 0.017359466 | GCDH/PKLR/GSTZ1/GLUL/OAT | 5 |
| BP | GO:0009065 | glutamine family amino acid catabolic process | 0.001140369 | 0.023772311 | 0.017359466 | GLUL/OAT | 2 |
| BP | GO:0016054 | organic acid catabolic process | 0.001282892 | 0.026074772 | 0.019040812 | GCDH/GSTZ1/GLUL/OAT | 4 |
| BP | GO:0006805 | xenobiotic metabolic process | 0.001416726 | 0.028092639 | 0.020514337 | AOC1/CYP1A2/CYP2C19 | 3 |
| BP | GO:0006721 | terpenoid metabolic process | 0.001556546 | 0.02960266 | 0.021617013 | DGAT2/CYP1A2/CYP2C19 | 3 |
| BP | GO:0071466 | cellular response to xenobiotic stimulus | 0.001592803 | 0.02960266 | 0.021617013 | AOC1/CYP1A2/CYP2C19 | 3 |
| BP | GO:0009072 | aromatic amino acid family metabolic process | 0.001602112 | 0.02960266 | 0.021617013 | GCDH/GSTZ1 | 2 |
| BP | GO:0009410 | response to xenobiotic stimulus | 0.001821503 | 0.032908491 | 0.024031059 | AOC1/CYP1A2/CYP2C19 | 3 |
| BP | GO:0098754 | detoxification | 0.002113079 | 0.035946458 | 0.026249502 | GSTZ1/MT1F/MT1M | 3 |
| BP | GO:0033865 | nucleoside bisphosphate metabolic process | 0.002201404 | 0.035946458 | 0.026249502 | DGAT2/GCDH/GSTZ1 | 3 |
| BP | GO:0033875 | ribonucleoside bisphosphate metabolic process | 0.002201404 | 0.035946458 | 0.026249502 | DGAT2/GCDH/GSTZ1 | 3 |
| BP | GO:0034032 | purine nucleoside bisphosphate metabolic process | 0.002201404 | 0.035946458 | 0.026249502 | DGAT2/GCDH/GSTZ1 | 3 |
| BP | GO:0006882 | cellular zinc ion homeostasis | 0.002254944 | 0.035946458 | 0.026249502 | MT1F/MT1M | 2 |
| BP | GO:0008210 | estrogen metabolic process | 0.002254944 | 0.035946458 | 0.026249502 | HSD17B14/CYP1A2 | 2 |
| BP | GO:0006720 | isoprenoid metabolic process | 0.002338151 | 0.036417352 | 0.026593366 | DGAT2/CYP1A2/CYP2C19 | 3 |
| BP | GO:0071470 | cellular response to osmotic stress | 0.002374071 | 0.036417352 | 0.026593366 | PKD2/EFHD1 | 2 |
| BP | GO:0055069 | zinc ion homeostasis | 0.002496118 | 0.03758045 | 0.027442706 | MT1F/MT1M | 2 |
| BP | GO:0008203 | cholesterol metabolic process | 0.002627227 | 0.038835199 | 0.028358972 | TSKU/DGAT2/CYP1A2 | 3 |
| BP | GO:0035337 | fatty-acyl-CoA metabolic process | 0.002748933 | 0.039908616 | 0.029142823 | DGAT2/GCDH | 2 |
| BP | GO:1902652 | secondary alcohol metabolic process | 0.003100775 | 0.044151428 | 0.032241089 | TSKU/DGAT2/CYP1A2 | 3 |
| BP | GO:0017144 | drug metabolic process | 0.003149794 | 0.044151428 | 0.032241089 | CYP1A2/CYP2C19 | 2 |
| BP | GO:0042572 | retinol metabolic process | 0.003431339 | 0.046689771 | 0.034094686 | DGAT2/CYP1A2 | 2 |
| BP | GO:0016042 | lipid catabolic process | 0.003494756 | 0.046689771 | 0.034094686 | GCDH/HSD17B14/PLIN1/CYP1A2 | 4 |
| BP | GO:0016125 | sterol metabolic process | 0.003503169 | 0.046689771 | 0.034094686 | TSKU/DGAT2/CYP1A2 | 3 |
| BP | GO:0009152 | purine ribonucleotide biosynthetic process | 0.004131339 | 0.054173851 | 0.039559852 | GCDH/PKLR/GSTZ1 | 3 |
| BP | GO:0035384 | thioester biosynthetic process | 0.004343715 | 0.055178758 | 0.040293675 | GCDH/GSTZ1 | 2 |
| BP | GO:0071616 | acyl-CoA biosynthetic process | 0.004343715 | 0.055178758 | 0.040293675 | GCDH/GSTZ1 | 2 |
| BP | GO:0010043 | response to zinc ion | 0.005007592 | 0.062142096 | 0.045378575 | MT1F/MT1M | 2 |
| BP | GO:0009260 | ribonucleotide biosynthetic process | 0.005044746 | 0.062142096 | 0.045378575 | GCDH/PKLR/GSTZ1 | 3 |
| BP | GO:0019369 | arachidonic acid metabolic process | 0.005355972 | 0.064991126 | 0.047459047 | CYP1A2/CYP2C19 | 2 |
| BP | GO:0046390 | ribose phosphate biosynthetic process | 0.005583197 | 0.066752043 | 0.048744937 | GCDH/PKLR/GSTZ1 | 3 |
| BP | GO:0006164 | purine nucleotide biosynthetic process | 0.005743148 | 0.067669261 | 0.049414725 | GCDH/PKLR/GSTZ1 | 3 |
| MF | GO:0046943 | carboxylic acid transmembrane transporter activity | 0.000220213 | 0.018050191 | 0.010687613 | SLC13A5/SLCO1B3/SLC16A10/SLC16A4 | 4 |
| MF | GO:0005342 | organic acid transmembrane transporter activity | 0.000225627 | 0.018050191 | 0.010687613 | SLC13A5/SLCO1B3/SLC16A10/SLC16A4 | 4 |
| MF | GO:0070330 | aromatase activity | 0.001032897 | 0.03857917 | 0.02284293 | CYP1A2/CYP2C19 | 2 |
| MF | GO:0015291 | secondary active transmembrane transporter activity | 0.001072803 | 0.03857917 | 0.02284293 | SLC13A5/SLCO1B3/SLC16A10/SLC16A4 | 4 |
| MF | GO:0051393 | alpha-actinin binding | 0.001205599 | 0.03857917 | 0.02284293 | PKD2/KCNN2 | 2 |
| MF | GO:1901681 | sulfur compound binding | 0.001463552 | 0.039028059 | 0.023108719 | GCDH/PCOLCE/PCOLCE2/AOC1 | 4 |
| MF | GO:0016712 | oxidoreductase activity, acting on paired donors, with incorporation or reduction of molecular oxygen, reduced flavin or flavoprotein as one donor, and incorporation of one atom of oxygen | 0.002024205 | 0.039927436 | 0.023641245 | CYP1A2/CYP2C19 | 2 |
| MF | GO:0042805 | actinin binding | 0.002140714 | 0.039927436 | 0.023641245 | PKD2/KCNN2 | 2 |
| MF | GO:0008395 | steroid hydroxylase activity | 0.002383057 | 0.039927436 | 0.023641245 | CYP1A2/CYP2C19 | 2 |
| MF | GO:0022804 | active transmembrane transporter activity | 0.002495465 | 0.039927436 | 0.023641245 | SLC13A5/SLCO1B3/SLC16A10/SLC16A4 | 4 |
| MF | GO:0016504 | peptidase activator activity | 0.003042781 | 0.044258638 | 0.026205773 | PCOLCE/PCOLCE2 | 2 |
| MF | GO:0008201 | heparin binding | 0.003726396 | 0.049685285 | 0.029418919 | PCOLCE/PCOLCE2/AOC1 | 3 |
| MF | GO:0008237 | metallopeptidase activity | 0.005138034 | 0.063237343 | 0.037443164 | MME/CNDP1/THOP1 | 3 |
| MF | GO:0005518 | collagen binding | 0.007450371 | 0.081745406 | 0.048401885 | PCOLCE/PCOLCE2 | 2 |
| MF | GO:0008028 | monocarboxylic acid transmembrane transporter activity | 0.007663632 | 0.081745406 | 0.048401885 | SLCO1B3/SLC16A4 | 2 |
| MF | GO:0016747 | transferase activity, transferring acyl groups other than amino-acyl groups | 0.008934962 | 0.084311999 | 0.049921578 | DGAT2/NAGS/GLUL | 3 |
| MF | GO:0005539 | glycosaminoglycan binding | 0.009262713 | 0.084311999 | 0.049921578 | PCOLCE/PCOLCE2/AOC1 | 3 |
| MF | GO:0061134 | peptidase regulator activity | 0.0094851 | 0.084311999 | 0.049921578 | FETUB/PCOLCE/PCOLCE2 | 3 |
| Type | KEGG | ID | Description | pvalue | p.adjust | qvalue | geneID | Count |
| ClusterA |  | hsa04512 | ECM-receptor interaction | 0.000320798 | 0.024297634 | 0.022001253 | THBS2/FREM2/SPP1/COL1A2 | 4 |
|  | hsa04061 | Viral protein interaction with cytokine and cytokine receptor | 0.00052253 | 0.024297634 | 0.022001253 | CXCL6/CCL20/CCL19/CXCL10 | 4 |
|  | hsa04060 | Cytokine-cytokine receptor interaction | 0.004726106 | 0.104293359 | 0.094436545 | CXCL6/IL32/CCL20/CCL19/CXCL10 | 5 |
|  | hsa04657 | IL-17 signaling pathway | 0.005300992 | 0.104293359 | 0.094436545 | CXCL6/CCL20/CXCL10 | 3 |
|  | hsa04062 | Chemokine signaling pathway | 0.005729034 | 0.104293359 | 0.094436545 | CXCL6/CCL20/CCL19/CXCL10 | 4 |
|  | hsa04510 | Focal adhesion | 0.006728604 | 0.104293359 | 0.094436545 | THBS2/SPP1/COL1A2/IGF1 | 4 |
|  | hsa04668 | TNF signaling pathway | 0.008607206 | 0.114352885 | 0.103545341 | CXCL6/CCL20/CXCL10 | 3 |
|  | hsa00565 | Ether lipid metabolism | 0.0147631 | 0.171621039 | 0.155401054 | ENPP2/PLA2G2A | 2 |
|  | hsa04115 | p53 signaling pathway | 0.031183115 | 0.304793951 | 0.275987732 | ZMAT3/IGF1 | 2 |
|  | hsa03320 | PPAR signaling pathway | 0.032773543 | 0.304793951 | 0.275987732 | FABP5/FABP4 | 2 |
|  | hsa05205 | Proteoglycans in cancer | 0.042158295 | 0.323408299 | 0.292842829 | LUM/COL1A2/IGF1 | 3 |
|  | hsa04151 | PI3K-Akt signaling pathway | 0.043788833 | 0.323408299 | 0.292842829 | THBS2/SPP1/COL1A2/IGF1 | 4 |
|  | hsa05323 | Rheumatoid arthritis | 0.048443958 | 0.323408299 | 0.292842829 | CXCL6/CCL20 | 2 |
| ClusterB |  | hsa00380 | Tryptophan metabolism | 0.000116787 | 0.005121956 | 0.003741063 | GCDH/AOC1/CYP1A2 | 3 |
|  | hsa00330 | Arginine and proline metabolism | 0.000209059 | 0.005121956 | 0.003741063 | CNDP1/AOC1/OAT | 3 |
|  | hsa01230 | Biosynthesis of amino acids | 0.000654293 | 0.010353478 | 0.007562153 | PKLR/NAGS/GLUL | 3 |
|  | hsa00220 | Arginine biosynthesis | 0.001159143 | 0.010353478 | 0.007562153 | NAGS/GLUL | 2 |
|  | hsa00340 | Histidine metabolism | 0.001159143 | 0.010353478 | 0.007562153 | CNDP1/AOC1 | 2 |
|  | hsa04614 | Renin-angiotensin system | 0.001267773 | 0.010353478 | 0.007562153 | MME/THOP1 | 2 |
|  | hsa00591 | Linoleic acid metabolism | 0.002017546 | 0.014122824 | 0.010315274 | CYP1A2/CYP2C19 | 2 |
|  | hsa04978 | Mineral absorption | 0.008425188 | 0.051604274 | 0.037691629 | MT1F/MT1M | 2 |
|  | hsa05204 | Chemical carcinogenesis - DNA adducts | 0.011028524 | 0.058632937 | 0.042825346 | CYP1A2/CYP2C19 | 2 |
|  | hsa00982 | Drug metabolism - cytochrome P450 | 0.011965906 | 0.058632937 | 0.042825346 | CYP1A2/CYP2C19 | 2 |
